# Supplementary material for: Transcriptomic profiling and pathway analysis of cultured human lung microvascular endothelial cells following ionizing radiation exposure
Source: PubMed Central journal article supplement (PMC8688546; doi:10.1038/s41598-021-03636-7), 2021-12-20
Supplement: 41598_2021_3636_MOESM1_ESM.pdf [file 41598_2021_3636_MOESM1_ESM.pdf]

Table S1. List of gene expression changes by time point post-irradiation: 2 h, 4 h, 6 h, 8 h , and

| Gene     | I2fc_2hr | I2fc_4hr | I2fc_6hr | I2fc_8hr | I2fc_24hr | LRT_fdr   |
|----------|----------|----------|----------|----------|-----------|-----------|
| MAMDC2   | 0.369    | 0.543    | 0.937    | 1.402    | 2.945     | 0         |
| PLA2G4C  | 0.007    | 0.712    | 1.364    | 1.767    | 4.326     | 4.6e-311  |
| BMP2     | 0.568    | 0.699    | 0.78     | 0.88     | 3.549     | 8.73e-316 |
| PLAU     | 0.655    | 0.743    | 1.531    | 1.733    | 4.057     | 3.97E-296 |
| CX3CL1   | -0.005   | 1.347    | 1.105    | 0.319    | 4.73      | 1.02E-291 |
| PCDH12   | -0.206   | 0.335    | 1.142    | 1.527    | 3.511     | 5.50E-290 |
| STC1     | -0.366   | -0.237   | 0.43     | 0.582    | 3.786     | 2.13E-275 |
| TNFSF15  | -0.336   | 0.56     | 1.691    | 2.056    | 5.46      | 4.85E-267 |
| BTG2     | 2.559    | 1.562    | 1.677    | 1.436    | 2.108     | 8.18E-258 |
| NRG1     | -1.283   | 0.805    | 0.16     | -0.112   | -0.891    | 2.73E-256 |
| ATF3     | 3.62     | 2.856    | 2.38     | 1.628    | 2.592     | 4.81E-256 |
| CCNE2    | 0.858    | 0.194    | -0.632   | -1.459   | -1.955    | 1.16E-254 |
| CDCP1    | 0.112    | 0.138    | 0.556    | 1.101    | 3.544     | 4.06E-251 |
| CDH11    | 0.058    | 0.173    | 0.157    | 0.536    | 2.215     | 1.80E-250 |
| PLAT     | 0.286    | 0.133    | 0.307    | 0.919    | 3.139     | 7.03E-245 |
| TP53INP1 | 1.753    | 1.398    | 1.291    | 1.006    | 1.758     | 6.40E-244 |
| TRIM22   | 0.443    | 0.963    | 1.104    | 1.164    | 1.584     | 1.85E-227 |
| LTB      | -0.335   | -0.08    | 0.314    | -0.081   | 4.73      | 1.65E-221 |
| CCND2    | -0.489   | 0.35     | 0.967    | 0.829    | 2.169     | 5.20E-221 |
| CTNNBIP1 | 0.119    | -0.039   | 0.184    | 0.581    | 1.712     | 3.19E-220 |
| GAS6     | 0.212    | 0.162    | 0.22     | 0.401    | 1.647     | 6.90E-216 |
| LPXN     | 0.37     | 0.031    | -0.064   | 0.242    | 2.073     | 3.17E-214 |
| SIPA1L3  | 0.216    | 0.016    | 0.728    | 1.071    | 1.93      | 9.87E-213 |
| ADAM19   | 0.123    | -0.165   | 0.126    | 0.406    | 1.891     | 2.17E-212 |
| IL32     | 0.221    | 0.52     | 0.757    | 0.823    | 2.378     | 3.45E-209 |
| OGFRL1   | 0.278    | 0.267    | 0.522    | 0.645    | 1.988     | 5.09E-209 |
| TRAF1    | -0.272   | 1.614    | 1.3      | 0.337    | 2.844     | 1.10E-202 |
| FST      | -0.01    | 0.992    | 0.195    | -0.086   | -2.006    | 5.53E-201 |
| VWCE     | 1.286    | 2.246    | 2.343    | 2.015    | 2.606     | 1.35E-199 |
| CYTL1    | 0.082    | 0.555    | 0.97     | 1.053    | 2.515     | 5.66E-198 |
| SLC7A7   | -0.255   | 0.158    | 0.641    | 1.058    | 1.959     | 1.41E-197 |
| MYO1B    | 0.224    | 0.134    | 0.365    | 0.68     | 1.833     | 1.53E-193 |
| KCNMA1   | 0.192    | 0.096    | 0.56     | 0.77     | 2.841     | 4.13E-190 |
| E2F1     | 0.526    | 0.049    | -0.852   | -1.497   | -1.559    | 7.89E-190 |
| SULF2    | 0.454    | 0.35     | 0.465    | 0.883    | 2.26      | 1.29E-188 |
| NDST1    | -0.012   | -0.02    | 0.228    | 0.587    | 1.632     | 1.64E-187 |

|          |        |        |        |        |        |           |
|----------|--------|--------|--------|--------|--------|-----------|
| HES2     | 0.677  | 0.433  | 0.892  | 1.227  | 1.993  | 1.74E-187 |
| CTSS     | 0.063  | 0.339  | 0.41   | 0.72   | 2.041  | 3.62E-185 |
| RHBDF2   | -0.181 | 0.245  | 0.795  | 0.85   | 1.64   | 5.35E-185 |
| AOX1     | 0.055  | -0.018 | 0.191  | 0.903  | 2.374  | 1.89E-182 |
| IGFBP1   | -0.049 | -0.109 | -0.561 | -0.532 | -4.25  | 4.58E-182 |
| STK32B   | 0.282  | 0.447  | 0.995  | 1.338  | 2.053  | 8.89E-182 |
| ITPKB    | -0.629 | 0.174  | 0.603  | 0.705  | 1.95   | 1.22E-181 |
| DDX58    | -0.224 | 0.658  | 0.692  | 0.925  | 1.947  | 6.32E-181 |
| FAM210B  | 0.483  | 0.452  | 0.59   | 0.883  | 1.646  | 1.31E-179 |
| TMEM158  | -0.113 | -0.334 | -0.387 | -0.091 | 2.609  | 6.93E-177 |
| MYH16    | -0.003 | 0.839  | 2.054  | 2.735  | 5.406  | 1.82E-176 |
| POU2F2   | -1.159 | 0.959  | 1.321  | 0.955  | 2.419  | 1.39E-175 |
| MDM2     | 2.096  | 1.75   | 1.922  | 1.397  | 1.909  | 2.57E-175 |
| PBXIP1   | 0.055  | 0.118  | 0.243  | 0.647  | 1.783  | 2.63E-175 |
| F11R     | 0.169  | 0.554  | 0.812  | 1.127  | 1.723  | 2.88E-175 |
| ALPK3    | 0.008  | -0.302 | -0.061 | 0.022  | 1.504  | 2.65E-172 |
| TP53I11  | -0.038 | 0.22   | 0.543  | 0.704  | 1.946  | 7.64E-172 |
| CMBL     | 0.433  | 0.866  | 1.417  | 1.776  | 2.558  | 8.48E-166 |
| MAP4K4   | 0.172  | 0.051  | 0.164  | 0.331  | 1.109  | 3.39E-163 |
| ZNF367   | 1.046  | 0.002  | -0.52  | -0.583 | -0.774 | 5.37E-163 |
| SH3RF3   | 0.328  | -0.077 | 0.538  | 0.976  | 1.946  | 2.65E-162 |
| CD82     | -0.048 | 0.18   | 0.808  | 1.349  | 3.282  | 3.60E-162 |
| SIRPB2   | -0.019 | -0.338 | 0.235  | 0.647  | 3.373  | 7.12E-161 |
| SLC7A11  | 0.084  | 0.386  | -0.171 | -0.287 | -1.792 | 7.72E-161 |
| GADD45A  | 1.233  | 1.076  | 1.153  | 0.88   | 1.778  | 9.50E-161 |
| TNFRSF21 | 0.384  | 0.236  | 0.274  | 0.495  | 1.893  | 3.40E-160 |
| JUP      | 0.184  | 0.078  | 0.302  | 0.906  | 2.285  | 1.31E-159 |
| E2F2     | 0.741  | -0.278 | -0.795 | -1.422 | -1.942 | 1.42E-158 |
| SPATA18  | 0.565  | 1.447  | 1.726  | 1.843  | 2.242  | 2.58E-158 |
| HIC1     | 0.286  | 0.31   | 1.019  | 0.828  | 3.179  | 1.56E-157 |
| TRIB1    | -0.843 | 0.745  | 0.889  | 0.694  | 2.001  | 1.14E-156 |
| SESN1    | 1.545  | 1.359  | 1.31   | 1.108  | 1.605  | 2.08E-155 |
| OTOGL    | 0.078  | 0.005  | -0.538 | -0.531 | -3.275 | 7.91E-155 |
| DYSF     | 0.24   | 0.03   | 0.414  | 0.887  | 2.234  | 1.04E-154 |
| PLEKHG1  | -0.43  | 0.427  | 0.799  | 0.907  | 1.855  | 7.49E-153 |
| CHST1    | -0.124 | -0.236 | 0.611  | 0.782  | 2.274  | 4.68E-151 |
| IGFBP3   | -0.076 | -0.008 | -0.263 | -0.119 | -3.927 | 1.71E-150 |
| RALA     | 0.354  | -0.169 | -0.301 | -0.111 | 1.055  | 7.14E-150 |

|             |        |        |        |        |        |           |
|-------------|--------|--------|--------|--------|--------|-----------|
| RGMB        | -0.363 | -0.128 | 0.069  | 0.185  | 1.313  | 1.29E-147 |
| NINJ1       | 0.313  | 0.499  | 0.799  | 1.086  | 2.05   | 2.68E-147 |
| KIAA1551    | -0.032 | 0.243  | 0.049  | -0.106 | 1.406  | 8.19E-147 |
| CCDC85C     | -0.226 | -0.548 | 0.141  | 0.641  | 1.661  | 1.56E-146 |
| SH3BP5      | -0.003 | 0.143  | 0.476  | 0.766  | 1.887  | 1.98E-146 |
| ARL4C       | 0.44   | 0.465  | 0.664  | 1.157  | 3.398  | 5.32E-146 |
| FRMD6       | 0.095  | 0.573  | 0.785  | 0.866  | 1.963  | 6.69E-145 |
| KITLG       | 0.994  | 1.049  | 0.781  | 1.048  | 2.583  | 9.34E-145 |
| MPP4        | -0.096 | 0.034  | 0.699  | 0.924  | 2.993  | 3.37E-143 |
| ADAMTS1     | 0.866  | 0.112  | -0.507 | -0.557 | -1.86  | 3.56E-143 |
| CYFIP2      | 0.353  | 1.565  | 1.803  | 2.174  | 2.523  | 3.17E-142 |
| APOL3       | 0.073  | 0.762  | 1.47   | 1.259  | 2.578  | 4.83E-142 |
| CHST2       | 0.223  | -0.286 | -0.089 | 0.359  | 1.297  | 2.33E-141 |
| CDKN1A      | 2.376  | 2.121  | 1.81   | 1.717  | 2.078  | 3.72E-141 |
| ETS1        | 0.681  | 0.683  | 0.691  | 0.738  | 1.723  | 2.37E-140 |
| WDR76       | 0.624  | 0.02   | -0.594 | -0.789 | -1.588 | 3.11E-140 |
| ALDH3A1     | 1.637  | 2.573  | 2.971  | 3.609  | 3.866  | 1.16E-138 |
| GALNT6      | 0.195  | 0.077  | 0.296  | 0.705  | 2.073  | 1.76E-138 |
| EPS8L2      | 0.103  | 1.353  | 1.842  | 1.662  | 2.574  | 3.22E-137 |
| ITGA2       | 0.069  | 0.913  | 1.015  | 1.131  | 1.776  | 5.77E-137 |
| RP11-497D6  | 0.142  | 0.014  | -0.192 | -0.167 | 2.524  | 2.39E-136 |
| BTG1        | 0.84   | 0.379  | 0.293  | 0.48   | 1.304  | 3.31E-136 |
| PNMA2       | -0.564 | 0      | 0.949  | 1.353  | 2.416  | 1.00E-135 |
| SMAD1       | -0.095 | 0.06   | 0.252  | 0.553  | 1.985  | 1.34E-134 |
| CDC25A      | 0.825  | -0.142 | -0.686 | -0.819 | -0.874 | 1.52E-134 |
| CSF1        | 0.517  | 1.239  | 0.384  | -0.155 | 1.945  | 2.62E-134 |
| IL1A        | 0.258  | 0.519  | 1.256  | 1.02   | 3.087  | 3.61E-134 |
| INSIG1      | 0.824  | -0.269 | -0.567 | -0.514 | 0.749  | 5.49E-133 |
| RP11-54A9.1 | -0.061 | 0.059  | 0.495  | 0.545  | 1.184  | 1.49E-131 |
| PARP14      | 0.006  | 0.602  | 0.871  | 0.889  | 1.905  | 3.07E-131 |
| TMEM98      | 0.053  | 0.022  | 0.007  | 0.215  | 1.001  | 8.61E-131 |
| SESN2       | 1.87   | 1.147  | 1.305  | 0.831  | 1.33   | 8.93E-130 |
| TNS3        | -0.077 | 0.098  | 0.594  | 0.855  | 1.453  | 7.43E-127 |
| ARHGAP22    | -0.196 | 0.042  | 0.707  | 0.936  | 1.485  | 1.75E-125 |
| SVIL        | 0.142  | 0.166  | 0.452  | 0.523  | 1.116  | 5.20E-124 |
| PLA2G4A     | 0.372  | 0.097  | -0.555 | -0.901 | -3.052 | 1.07E-123 |
| CCNB1       | -0.946 | -1.877 | -1.593 | -0.76  | -0.194 | 2.59E-123 |
| DFNA5       | 0.362  | 0.39   | 0.699  | 1.155  | 1.718  | 2.93E-123 |

|         |        |        |        |        |        |           |
|---------|--------|--------|--------|--------|--------|-----------|
| ZFAND5  | 0.532  | 0.318  | 0.173  | 0.139  | 0.893  | 3.16E-123 |
| TCF19   | 0.259  | 0.103  | -0.02  | -0.157 | -1.266 | 1.09E-122 |
| TMEM217 | 0.485  | 1.866  | 1.801  | 1.525  | 3.171  | 1.10E-122 |
| MFAP2   | 0.123  | 0.059  | -0.018 | 0.312  | 1.671  | 1.56E-122 |
| IRF1    | 0.798  | 1.008  | 0.237  | 0.132  | 1.986  | 2.10E-122 |
| ERGIC1  | 0.188  | -0.108 | 0.077  | 0.416  | 1.245  | 5.24E-122 |
| GDF15   | 1.882  | 2.126  | 1.776  | 1.622  | 1.959  | 1.34E-121 |
| BNIP3L  | 0.211  | 0.322  | 0.589  | 0.994  | 1.679  | 1.68E-121 |
| RBFOX2  | 0.175  | -0.116 | 0.083  | 0.366  | 0.921  | 6.20E-121 |
| PLK2    | 1.436  | 1.23   | 1.115  | 0.827  | 1.691  | 4.22E-120 |
| LOX     | 0.386  | 0.044  | -0.175 | -0.033 | 1.452  | 6.15E-120 |
| SLC40A1 | 0.789  | 1.33   | 0.341  | -0.448 | -1.44  | 4.88E-119 |
| LDLR    | 0.724  | -0.516 | -1.141 | -1.126 | 0.122  | 1.74E-118 |
| SOX7    | 0.015  | 0.482  | 0.322  | 0.495  | 1.643  | 4.76E-118 |
| PIK3CD  | -0.223 | 0.604  | 0.742  | 0.654  | 1.672  | 6.77E-118 |
| TNFSF4  | -0.075 | 0.605  | 0.874  | 0.867  | 1.852  | 1.49E-117 |
| RHOF    | 0.189  | -0.193 | 0.182  | 0.558  | 1.74   | 4.37E-117 |
| RPGR    | 0.196  | -0.009 | -0.227 | -0.473 | -1.627 | 5.56E-117 |
| PDGFC   | 0.439  | 0.797  | 0.61   | 1.008  | 1.615  | 9.70E-117 |
| DOCK4   | 0.513  | -0.032 | 0.456  | 0.526  | 1.115  | 6.51E-116 |
| CEACAM1 | 0.568  | 1.604  | 1.948  | 2.11   | 3.632  | 2.54E-115 |
| PHLDB2  | -0.267 | 0.03   | 0.289  | 0.339  | 1.172  | 3.48E-115 |
| DLG1    | -0.188 | 0.12   | 0.399  | 0.617  | 1.209  | 2.50E-114 |
| PPM1D   | 1.464  | 0.785  | 0.634  | 0.457  | 0.875  | 4.00E-114 |
| PTGS2   | 2.054  | 0.236  | -0.45  | -0.748 | -1.219 | 6.74E-114 |
| LPIN1   | -0.093 | 0.117  | 0.277  | 0.393  | 1.217  | 2.51E-113 |
| OCIAD2  | 0.1    | -0.18  | -0.274 | -0.271 | 1.085  | 3.87E-113 |
| UBE2H   | 0.233  | 0.218  | 0.311  | 0.568  | 1.503  | 4.96E-113 |
| ARL6IP1 | -0.483 | -0.86  | -1.032 | -0.546 | 0.143  | 8.12E-113 |
| SMAD3   | 0.35   | 0.642  | 0.889  | 0.778  | 1.727  | 1.04E-112 |
| IL1RL1  | 0.252  | 0.076  | -0.4   | -0.477 | -2.633 | 2.60E-112 |
| MYLK    | 0.217  | 0.019  | 0.18   | 0.634  | 1.599  | 3.82E-112 |
| MGLL    | 0.244  | -0.027 | 0.191  | 0.697  | 1.597  | 7.88E-112 |
| CDC6    | 0.76   | 0.119  | -0.487 | -0.553 | -1.115 | 1.05E-111 |
| TNFRSF4 | -0.87  | 0.619  | 1.209  | 0.905  | 3.413  | 1.77E-111 |
| ANGPTL2 | 0.51   | 0.495  | 0.778  | 1.348  | 2.288  | 7.93E-111 |
| POLE    | 0.123  | 0.021  | -0.303 | -0.845 | -1.109 | 2.46E-110 |
| CCNG2   | 0.178  | 0.22   | 0.281  | 0.637  | 1.587  | 5.24E-110 |

|             |        |        |        |        |        |           |
|-------------|--------|--------|--------|--------|--------|-----------|
| FHL2        | 0.51   | 0.622  | 0.945  | 1.254  | 1.669  | 4.26E-109 |
| IRF6        | 0.73   | -0.035 | -0.809 | -0.98  | -2.681 | 4.66E-109 |
| DOCK10      | 0.169  | -0.059 | 0.209  | 0.214  | 1.118  | 2.09E-108 |
| TMEM132A    | -0.039 | 0.063  | 0.042  | 0.189  | 1.147  | 2.17E-108 |
| TRAK1       | 0.071  | 0.338  | 0.482  | 0.542  | 1.106  | 3.75E-108 |
| PTPN22      | 0.706  | -0.201 | 0.213  | 0.722  | 2.914  | 1.28E-107 |
| RHOBTB1     | 0.599  | 0.108  | 0.226  | 0.455  | 1.512  | 1.28E-107 |
| YBX3        | 0.388  | 0.594  | 0.724  | 0.847  | 1.229  | 1.54E-107 |
| ORC1        | 0.767  | 0.053  | -0.699 | -0.621 | -1.408 | 2.39E-107 |
| LRP8        | -0.039 | -0.134 | -0.124 | -0.539 | -1.258 | 3.14E-106 |
| IRAK2       | 0.414  | 0.909  | 0.684  | 0.616  | 1.847  | 7.55E-106 |
| TNIP1       | 0.056  | 0.607  | 0.744  | 0.912  | 1.663  | 7.75E-106 |
| DRAM1       | 0.496  | 0.827  | 0.768  | 0.823  | 1.238  | 1.02E-105 |
| ANTXR1      | 0.09   | -0.036 | -0.121 | 0.217  | 1.25   | 1.14E-105 |
| ART4        | 0.528  | 0.534  | -0.303 | -0.792 | -1.85  | 1.69E-105 |
| HMGCS1      | 0.873  | -0.2   | -0.699 | -0.745 | 0.01   | 4.16E-105 |
| DBNDD1      | -0.077 | 0.051  | 0.362  | 0.818  | 1.428  | 4.68E-105 |
| RP1-152L7.5 | -0.968 | 0.024  | 0.395  | 0.125  | 1.534  | 6.37E-105 |
| ADAMTS7     | 0.108  | 0.434  | 0.565  | 0.478  | 1.518  | 6.72E-105 |
| PGF         | 0.632  | -0.047 | 0.252  | 0.376  | 1.5    | 1.35E-104 |
| BACE2       | 0.221  | 0.038  | 0.011  | 0.355  | 1.299  | 2.87E-104 |
| AKR1C3      | -0.194 | -0.106 | -0.129 | -0.071 | -1.132 | 1.64E-103 |
| MMP14       | 0.146  | 0.245  | 0.376  | 0.702  | 1.439  | 2.93E-103 |
| CORO1C      | 0.142  | -0.088 | 0.044  | 0.331  | 0.819  | 1.18E-102 |
| DAB2        | 0.268  | 0.172  | 0.338  | 0.612  | 1.317  | 1.38E-102 |
| BMP4        | -0.653 | -0.086 | -0.581 | -0.489 | -2.128 | 2.91E-102 |
| PSRC1       | -2.334 | -2.493 | -1.695 | -1.101 | -1.16  | 4.18E-102 |
| PFKFB3      | 0.578  | 0.342  | 0.268  | 0.367  | 1.338  | 9.18E-102 |
| KSR2        | -0.12  | -0.429 | 0.466  | 0.455  | 1.32   | 3.17E-101 |
| MAP1LC3B    | 0.264  | 0.194  | 0.224  | 0.437  | 1.018  | 2.04E-100 |
| MAP3K6      | 0.603  | 0.056  | -0.2   | -0.605 | -1.164 | 3.01E-100 |
| JUN         | -1.228 | 0.261  | 0.284  | 0.323  | 1.119  | 9.67E-100 |
| RP11-889L3. | -0.542 | 0.056  | 0.596  | 0.357  | 2.121  | 2.20E-99  |
| AFAP1L1     | 0.078  | -0.027 | 0.406  | 0.609  | 1.373  | 8.40E-99  |
| SLCO2A1     | 0.228  | -0.284 | -0.858 | -0.886 | -2.54  | 9.91E-99  |
| RELB        | 0.213  | 1.85   | 1.101  | 0.575  | 1.811  | 1.85E-98  |
| ANXA3       | -0.092 | -0.152 | 0.126  | 0.308  | 1.646  | 4.00E-98  |
| PHLDA3      | 1.657  | 1.824  | 1.633  | 1.737  | 2.151  | 1.07E-97  |

|           |        |        |        |        |        |          |
|-----------|--------|--------|--------|--------|--------|----------|
| NMT2      | 0.158  | -0.019 | 0.005  | 0.325  | 0.959  | 1.13E-97 |
| APOL1     | 0.258  | 0.363  | 0.68   | 1.093  | 2.229  | 2.19E-97 |
| DGCR8     | -0.006 | -0.183 | -0.344 | -0.892 | -0.676 | 2.76E-97 |
| NEK7      | -0.206 | -0.11  | -0.366 | -0.493 | -1.339 | 3.55E-97 |
| SLC7A14   | -0.304 | 0.4    | 0.96   | 1.256  | 1.953  | 4.61E-97 |
| NTM       | 0.169  | 0.084  | 0.03   | 0.206  | 1.797  | 7.40E-97 |
| ANXA4     | 0.317  | 0.313  | 0.435  | 0.697  | 1.369  | 2.92E-96 |
| SP6       | -0.823 | 0.075  | 0.58   | 0.633  | 1.357  | 8.67E-96 |
| PLD1      | -0.245 | -0.034 | 0.621  | 0.941  | 1.649  | 1.11E-95 |
| FDXR      | 1.392  | 1.6    | 1.637  | 1.488  | 1.646  | 1.39E-95 |
| TSPAN18   | 0.209  | -0.289 | -0.172 | 0.31   | 1.56   | 1.64E-95 |
| CDKN2B    | 0.673  | 0.852  | 0.679  | 0.885  | 2.224  | 1.18E-94 |
| RAD54L    | 0.082  | 0.037  | -0.253 | -0.813 | -1.474 | 2.88E-94 |
| TMTC1     | -0.116 | 0.005  | -0.344 | -0.348 | -2.268 | 4.39E-94 |
| AURKA     | -1.134 | -1.789 | -1.506 | -0.661 | -0.442 | 4.51E-94 |
| ELMOD1    | 0.324  | -0.695 | -1.255 | -1.812 | -3.173 | 4.53E-94 |
| LGALS9    | 0.146  | 0.208  | 0.164  | 0.546  | 2.621  | 1.03E-93 |
| CCDC68    | 0.76   | -0.109 | -0.758 | -0.811 | -2.356 | 1.36E-93 |
| MB21D2    | 0.074  | 0.117  | 0.406  | 1.078  | 1.866  | 1.47E-93 |
| CABLES1   | 1.364  | -0.244 | 0.391  | 1.104  | 1.559  | 1.50E-93 |
| SOX4      | 0.683  | 0.271  | 0.876  | 1.285  | 2.219  | 1.62E-93 |
| CSGALNAC1 | -0.022 | 0.069  | 0.567  | 1.121  | 2.116  | 2.29E-93 |
| ZWINT     | -0.02  | 0.035  | -0.062 | -0.099 | -1.051 | 3.36E-93 |
| ATP2B4    | 0.128  | -0.038 | 0.296  | 0.595  | 1.38   | 4.84E-93 |
| CXCR4     | -0.328 | 0.669  | 1.207  | 1.198  | 3.156  | 5.31E-93 |
| BLOC1S5   | -0.022 | -0.038 | -0.407 | -0.659 | -1.557 | 7.65E-93 |
| ANTXR2    | 0.274  | -0.188 | -0.218 | 0.104  | 0.944  | 1.31E-92 |
| MYO5C     | -0.311 | 0.146  | 0.819  | 1.03   | 2.442  | 2.11E-92 |
| MEDAG     | 0.283  | -0.837 | -0.137 | 0.662  | 1.424  | 2.52E-92 |
| ZSWIM4    | 0.084  | 0.963  | 0.62   | 0.437  | 1.582  | 4.84E-92 |
| ERCC6     | -0.397 | -0.15  | -0.389 | -0.599 | -1.726 | 7.18E-92 |
| CLCN4     | 0.168  | -0.231 | -0.382 | -0.091 | -1.42  | 8.06E-92 |
| SRSF3     | 0.243  | -0.046 | -0.274 | -0.483 | -0.537 | 9.97E-92 |
| APOBEC3C  | 0.493  | 0.593  | 0.921  | 1.546  | 2.745  | 4.02E-91 |
| GRK5      | 0.219  | -0.353 | -0.168 | 0.153  | 1.055  | 4.37E-91 |
| OAS2      | -0.03  | -0.014 | 0.611  | 1.101  | 2.157  | 5.54E-91 |
| MICA      | 0.167  | -0.057 | -0.214 | -0.356 | -0.921 | 9.80E-91 |
| SHISA3    | -0.536 | -0.115 | -0.549 | -0.51  | -2.817 | 1.36E-90 |

|            |        |        |        |        |        |          |
|------------|--------|--------|--------|--------|--------|----------|
| FAM83D     | -1.6   | -1.591 | -1.24  | -0.48  | -0.391 | 1.53E-90 |
| CCNE1      | 0.606  | -0.068 | -0.611 | -1.211 | -1.268 | 2.21E-90 |
| P2RX4      | -0.07  | 0.236  | 0.44   | 0.657  | 1.701  | 5.87E-90 |
| DTX3L      | -0.033 | 0.646  | 0.8    | 0.997  | 1.612  | 7.43E-90 |
| ICAM1      | 0.116  | 1.137  | 0.956  | 0.963  | 2.611  | 1.57E-89 |
| BBC3       | 2.09   | 1.701  | 1.827  | 1.627  | 2.389  | 1.64E-89 |
| ABLIM1     | 0.218  | 0.456  | 0.647  | 0.97   | 2.007  | 1.82E-89 |
| PASK       | -0.279 | -0.099 | -0.396 | -1.129 | -1.688 | 2.62E-89 |
| EFNB2      | 0.45   | -0.129 | -0.769 | -0.593 | -1.098 | 3.23E-89 |
| GLTSCR2    | 0.068  | 0.175  | 0.208  | 0.409  | 1.08   | 9.39E-89 |
| PAQR4      | 0.249  | -0.134 | -0.571 | -0.691 | -1.473 | 1.27E-88 |
| MCAM       | 0.024  | 0.118  | 0.204  | 0.549  | 1.409  | 1.45E-88 |
| MARCKSL1   | 0.14   | -0.124 | -0.278 | 0.189  | 1.162  | 2.34E-88 |
| WSCD1      | -0.243 | 0.107  | 0.607  | 0.952  | 1.849  | 2.43E-88 |
| DDB2       | 0.652  | 1.191  | 1.211  | 1.142  | 1.125  | 8.19E-88 |
| SIRPA      | 0.312  | 0.017  | -0.076 | 0.243  | 1.271  | 9.26E-88 |
| MASTL      | 0.569  | 0.3    | -0.191 | -0.237 | -0.518 | 1.16E-87 |
| FAM111B    | 0.663  | 0.258  | -0.43  | -0.596 | -1.919 | 1.64E-87 |
| SULT1B1    | -0.058 | -0.026 | -0.08  | 0.071  | -0.979 | 2.41E-87 |
| MSI2       | 0.337  | 0.046  | 0.298  | 0.512  | 0.996  | 2.55E-87 |
| MERTK      | -0.278 | 0.599  | 1.139  | 1.158  | 1.778  | 3.81E-87 |
| FAM49A     | 0.129  | 0.218  | 0.322  | 0.559  | 1.357  | 4.60E-87 |
| ARVCF      | -0.848 | 0.088  | 0.475  | 0.123  | 1.517  | 7.92E-87 |
| DSN1       | -0.115 | -0.02  | -0.225 | -0.403 | -1.165 | 8.38E-87 |
| ALDH7A1    | 0.341  | 0.283  | 0.313  | 0.736  | 1.669  | 8.74E-87 |
| CREB3L1    | 0.315  | 0.176  | 0.615  | 0.731  | 2.932  | 1.90E-86 |
| RNF24      | 0.285  | 0.209  | 0.247  | 0.222  | 1.207  | 2.56E-86 |
| IPMK       | 0.504  | 0.704  | 0.522  | 0.506  | 1.434  | 9.59E-86 |
| PLEKHO1    | 0.524  | -0.004 | -0.1   | 0.027  | 1.137  | 2.58E-85 |
| CTD-2562J1 | -0.03  | 0.213  | 0.756  | 1.061  | 1.981  | 2.76E-85 |
| FILIP1L    | 0.351  | 0.216  | 0.332  | 0.792  | 1.486  | 3.17E-85 |
| RRM2B      | 0.606  | 1.02   | 1.008  | 1.006  | 1.278  | 3.18E-85 |
| DDX11      | -0.215 | -0.142 | -0.22  | -0.887 | -1.496 | 3.23E-85 |
| HOMER3     | -0.178 | -0.149 | -0.096 | 0.053  | 0.898  | 7.10E-85 |
| TGIF1      | -0.874 | 0.148  | 0.228  | 0.229  | 1.106  | 1.55E-84 |
| ELMO1      | 0.226  | 0.224  | 0.332  | 0.87   | 1.701  | 1.72E-84 |
| DKK3       | 0.291  | 0.028  | -0.058 | 0.337  | 1.337  | 2.73E-84 |
| SH3D19     | -0.157 | -0.09  | -0.018 | 0.161  | 0.699  | 1.56E-83 |

|            |        |        |        |        |        |          |
|------------|--------|--------|--------|--------|--------|----------|
| POLD3      | 0.195  | 0.124  | -0.097 | -0.326 | -1.068 | 1.56E-83 |
| KIAA1211L  | 0.242  | 0.367  | 0.736  | 1.026  | 1.729  | 1.92E-83 |
| TFPI2      | 0.063  | 0.032  | -0.106 | 0.105  | 0.846  | 2.38E-83 |
| USP1       | 0.462  | 0.05   | -0.223 | -0.058 | -0.837 | 3.33E-83 |
| DTL        | 0.992  | 0.022  | -0.66  | -0.57  | -0.726 | 3.61E-83 |
| NT5E       | 0.158  | 0.006  | 0.086  | 0.525  | 1.245  | 4.84E-83 |
| GPC1       | 0.398  | 0.736  | 0.852  | 1.225  | 1.991  | 6.94E-83 |
| BCL2L11    | 0.161  | 0.661  | 0.383  | 0.283  | 2.781  | 7.08E-83 |
| SLC35B1    | 0.155  | 0.031  | -0.126 | -0.132 | -0.9   | 1.02E-82 |
| HMGCR      | 0.423  | -0.344 | -0.706 | -0.597 | -0.022 | 1.03E-82 |
| DCBLD2     | 0.088  | -0.138 | -0.405 | -0.191 | 0.771  | 1.06E-82 |
| GMNN       | 0.042  | -0.272 | -0.614 | -0.711 | -1.376 | 1.40E-82 |
| RALGPS2    | -0.023 | -0.234 | -0.248 | -0.034 | 0.905  | 1.59E-82 |
| CCBE1      | 0.256  | -0.075 | 0.149  | 0.532  | 1.33   | 2.11E-82 |
| FEZ1       | 0.235  | 0.263  | 0.412  | 0.748  | 1.148  | 2.55E-82 |
| EXO1       | 0.828  | 0.299  | -0.235 | -0.317 | -1.226 | 9.09E-82 |
| SASH1      | 0.273  | 0.153  | 0.71   | 0.967  | 1.299  | 1.10E-81 |
| CDCA7      | 0.051  | -0.43  | -1.028 | -1.225 | -0.901 | 1.77E-81 |
| CAPN2      | 0.179  | 0.065  | 0.218  | 0.549  | 1.275  | 1.04E-80 |
| PIK3IP1    | 0.104  | -0.252 | 0.055  | 0.247  | 2.488  | 1.08E-80 |
| CCNG1      | 0.545  | 0.765  | 0.763  | 0.696  | 1.176  | 1.50E-80 |
| ATP8B1     | 0.028  | 0.087  | 0.388  | 0.571  | 1.539  | 1.54E-80 |
| AIM1       | -0.665 | -0.09  | 0.326  | 0.559  | 1.254  | 1.57E-80 |
| RP11-284F2 | -0.191 | 0.218  | 1.643  | 2.175  | 2.852  | 1.76E-80 |
| SGIP1      | -0.089 | 0.243  | 0.643  | 0.337  | 2.55   | 2.53E-80 |
| UNG        | 0.557  | -0.172 | -1.008 | -0.914 | -0.561 | 2.53E-80 |
| FGL2       | 0.517  | 0.063  | -0.45  | -0.081 | -1.989 | 3.99E-80 |
| OPTN       | 0.123  | 0.482  | 0.535  | 0.642  | 1.289  | 5.56E-80 |
| ZBTB16     | 0.387  | 0.264  | -0.145 | -0.764 | -1.942 | 7.68E-80 |
| DGKA       | 0.067  | 0.597  | 0.871  | 0.66   | 0.567  | 1.00E-79 |
| RSPO3      | -0.481 | 0.44   | 0.023  | -0.186 | -2.299 | 1.03E-79 |
| HJURP      | -1.468 | -0.936 | -1.087 | -1.073 | -1.598 | 1.79E-79 |
| RNF121     | 0.02   | -0.098 | -0.298 | -0.361 | -1.091 | 1.98E-79 |
| STEAP1     | -0.406 | -0.443 | -0.49  | -0.449 | -1.557 | 2.32E-79 |
| SARAF      | -0.007 | 0.018  | 0.086  | 0.262  | 0.837  | 2.82E-79 |
| LIMS1      | 0.447  | 0.079  | 0.132  | 0.582  | 1.293  | 5.11E-79 |
| NF2        | -0.097 | -0.061 | 0.187  | 0.61   | 1.085  | 5.19E-79 |
| ABCG1      | 0.263  | 0.253  | 0.827  | 1.352  | 2.384  | 7.04E-79 |



|            |        |        |        |        |        |          |
|------------|--------|--------|--------|--------|--------|----------|
| BHLHE40    | 0.496  | 0.399  | 0.886  | 1.074  | 2.47   | 1.17E-78 |
| FRMD4A     | 0.3    | 0.092  | 0.514  | 0.618  | 0.932  | 1.28E-78 |
| NBAS       | 0.208  | 0.101  | 0.246  | 0.664  | 1.396  | 2.48E-78 |
| HMMR       | -0.802 | -1.148 | -1.149 | -0.857 | 0.041  | 5.31E-78 |
| MTSS1      | 0.021  | -0.143 | 0.488  | 0.484  | 1.801  | 9.09E-78 |
| CASP7      | -0.045 | 0.311  | 0.608  | 0.652  | 1.356  | 9.09E-78 |
| GBP3       | -0.246 | 0.092  | 0.457  | 0.628  | 0.973  | 1.19E-77 |
| AC007743.1 | 0.09   | 0.314  | 0.075  | -0.248 | -1.269 | 2.77E-77 |
| LAMA4      | 0.159  | 0.001  | 0.113  | 0.39   | 1.147  | 4.02E-77 |
| PLK1       | -1.146 | -2.204 | -1.641 | -0.69  | -0.644 | 6.28E-77 |
| PECAM1     | 0.173  | -0.033 | -0.028 | 0.422  | 1.117  | 1.02E-76 |
| PER2       | 0.251  | -0.658 | -1.325 | -1.948 | -1.226 | 1.24E-76 |
| CITED4     | -0.441 | -0.019 | 0.082  | 0.381  | 2.006  | 3.26E-76 |
| SERTAD1    | 1.176  | 0.234  | 0.247  | 0.268  | -0.032 | 9.42E-76 |
| PHACTR1    | 0.161  | -0.515 | 0.498  | 0.771  | 1.209  | 9.56E-76 |
| ATAD5      | 0.411  | 0.168  | -0.272 | -0.683 | -1.088 | 1.03E-75 |
| OSBPL3     | -0.219 | 0.512  | 0.773  | 0.575  | 1.157  | 1.61E-75 |
| NFATC2     | 0.762  | 0.812  | 1.642  | 1.81   | 2.853  | 3.94E-75 |
| MCM8       | 0.003  | 0.135  | -0.051 | -0.321 | -1.125 | 4.97E-75 |
| RUSC2      | 0.683  | 0.617  | 0.821  | 0.684  | 1.034  | 1.12E-74 |
| DNAJC9     | 0.279  | 0.073  | -0.148 | -0.178 | -0.727 | 1.61E-74 |
| TACC2      | 0.689  | -0.202 | 0.336  | 0.762  | 1.203  | 2.14E-74 |
| ACTA2      | 0.589  | 1.186  | 1.511  | 1.996  | 2.44   | 2.99E-74 |
| PALD1      | -0.374 | -0.136 | 1.057  | 1.139  | 2.584  | 4.18E-74 |
| THSD1      | 1.018  | 0.853  | 1.087  | 1.096  | 1.193  | 4.27E-74 |
| NFKB2      | -0.042 | 1.151  | 0.724  | 0.124  | 0.806  | 4.50E-74 |
| SNX22      | -0.607 | -0.641 | -1.339 | -1.926 | -3.518 | 8.87E-74 |
| RBBP8      | 0.346  | 0.337  | 0.023  | -0.097 | -1.094 | 8.99E-74 |
| ZNF703     | 0.299  | -0.096 | 0.079  | 0.434  | 1.358  | 9.07E-74 |
| TSPAN13    | 0.345  | -0.102 | -0.665 | -0.899 | -1.207 | 1.20E-73 |
| FAP        | 0.212  | -0.016 | 0.023  | 0.274  | 1.235  | 2.53E-73 |
| RP11-424C2 | 0.839  | -0.244 | -0.883 | -0.791 | -0.73  | 2.93E-73 |
| SPSB1      | 1.258  | 0.072  | 0.674  | 1.086  | 2.131  | 4.07E-73 |
| FBXO5      | -0.232 | -0.27  | -0.377 | -0.295 | -1.259 | 4.45E-73 |
| SYT9       | 0.179  | 0.002  | 0.231  | 0.669  | 1.559  | 5.08E-73 |
| NCOR2      | 0.422  | -0.222 | 0.449  | 0.736  | 1.195  | 6.67E-73 |
| FZD8       | 0.611  | -0.308 | -0.472 | -0.175 | 1.151  | 6.97E-73 |
| TRIM16     | -0.157 | -0.238 | 0.344  | 0.552  | 1.244  | 6.98E-73 |

|           |        |        |        |        |        |          |
|-----------|--------|--------|--------|--------|--------|----------|
| ASPM      | -1.222 | -1.564 | -1.409 | -1.062 | -0.734 | 8.06E-73 |
| UGCG      | -0.467 | 0.386  | 0.518  | 0.288  | 1.175  | 1.06E-72 |
| MCM10     | 0.614  | 0.088  | -0.49  | -0.451 | -1.244 | 1.09E-72 |
| TBC1D9    | 0.115  | 0.053  | 0.165  | 0.509  | 1.24   | 1.26E-72 |
| E2F8      | -0.132 | -0.264 | -0.268 | -0.319 | -1.677 | 1.26E-72 |
| CDC45     | 0.187  | 0.107  | -0.297 | -0.526 | -1.255 | 1.34E-72 |
| MEF2A     | 0.861  | 0.234  | 0.312  | 0.221  | 0.503  | 1.67E-72 |
| PDE1C     | -0.379 | 0.029  | 0.517  | 0.73   | 0.825  | 2.15E-72 |
| NYNRIN    | 0.037  | -0.103 | 0.266  | 0.513  | 1.143  | 2.22E-72 |
| CNTNAP1   | -0.324 | 0.168  | 0.606  | 0.501  | 1.532  | 2.80E-72 |
| NTN4      | 0.172  | 0.378  | 0.647  | 1.131  | 1.541  | 3.68E-72 |
| KIAA1462  | -0.055 | -0.089 | 0.177  | 0.31   | 0.998  | 3.99E-72 |
| RAD51AP1  | -0.125 | 0.033  | -0.18  | -0.298 | -1.318 | 4.75E-72 |
| TMEM63B   | -0.215 | 0.111  | 0.349  | 0.295  | 0.96   | 5.35E-72 |
| NFE2L3    | 0.255  | 0.303  | 0.337  | 0.754  | 1.557  | 5.82E-72 |
| QPCT      | 0.263  | 0.104  | 0.035  | 0.325  | 1.094  | 6.51E-72 |
| CXADR     | -0.415 | -0.526 | -0.075 | -0.033 | 1.303  | 7.64E-72 |
| CXorf36   | 0.001  | -0.042 | 0.558  | 0.681  | 3.101  | 1.09E-71 |
| LRRC17    | 0.302  | -0.288 | -0.725 | -0.767 | 1.759  | 2.61E-71 |
| F2RL1     | -0.211 | 0.569  | 0.316  | 0.324  | 1.43   | 3.39E-71 |
| PERP      | 0.252  | 0.177  | 0.2    | 0.565  | 1.213  | 4.18E-71 |
| UBE2C     | -0.752 | -1.399 | -1.25  | -0.934 | -0.683 | 4.18E-71 |
| ASAP1     | 0.307  | 0.128  | 0.45   | 0.472  | 0.939  | 4.83E-71 |
| RTN4      | 0.32   | 0.052  | -0.03  | 0.307  | 1.081  | 8.23E-71 |
| LAMC2     | 0.301  | 0.138  | 0.436  | 0.755  | 2.528  | 1.42E-70 |
| UBE2L6    | 0.151  | 0.088  | 0.325  | 0.744  | 2.148  | 1.45E-70 |
| PSTPIP2   | 0.364  | 1.105  | 1.009  | 1.036  | 1.341  | 1.86E-70 |
| MAST4     | 0.197  | 0.482  | 0.53   | 0.432  | 1.169  | 1.97E-70 |
| TNFRSF10C | 0.313  | 1.014  | 1.167  | 1.334  | 1.729  | 4.73E-70 |
| ANKRD1    | 0.002  | -0.047 | -0.117 | -0.043 | -1.014 | 6.69E-70 |
| NRIP1     | 0.547  | 0.468  | 0.507  | 0.491  | 1.679  | 7.18E-70 |
| PRSS23    | 0.248  | 0.005  | -0.131 | 0.153  | 0.844  | 9.17E-70 |
| ZNF207    | 0.087  | 0.027  | -0.1   | -0.37  | -0.384 | 9.29E-70 |
| RAB15     | -0.012 | 0.105  | 0.099  | -0.139 | 0.81   | 1.27E-69 |
| TNFAIP8L1 | -0.668 | 0.079  | 0.005  | 0.121  | 1.21   | 1.40E-69 |
| CDC20     | -0.911 | -1.817 | -1.549 | -0.721 | -0.673 | 2.01E-69 |
| IGBP1     | 0.178  | 0.152  | 0.254  | 0.518  | 0.955  | 2.28E-69 |
| COL25A1   | 0.506  | 0.183  | -0.004 | 0.004  | -1.935 | 2.32E-69 |

|          |        |        |        |        |        |          |
|----------|--------|--------|--------|--------|--------|----------|
| BASP1    | 0.244  | -0.103 | -0.1   | 0.275  | 0.95   | 2.51E-69 |
| XPC      | 0.726  | 0.986  | 0.91   | 0.898  | 1.323  | 6.37E-69 |
| ADGRL2   | -0.226 | -0.134 | -0.696 | -0.797 | -1.406 | 3.34E-68 |
| ESPL1    | -0.963 | -0.673 | -0.507 | -0.599 | -1.448 | 6.14E-68 |
| MGP      | 0.029  | 0.004  | -0.088 | -0.144 | -1.331 | 6.27E-68 |
| SAMD9L   | -0.235 | 0.187  | 0.544  | 0.467  | 1.076  | 1.06E-67 |
| CELF2    | 0.097  | 0.138  | 0.533  | 0.933  | 2.34   | 1.15E-67 |
| KLHL24   | 1.142  | 0.752  | 0.601  | 0.849  | 1.932  | 1.15E-67 |
| UTRN     | 0.183  | 0.039  | 0.185  | 0.392  | 1.231  | 1.64E-67 |
| DAP      | 0.149  | -0.011 | -0.002 | 0.307  | 0.852  | 1.73E-67 |
| CALCRL   | 0.182  | -0.036 | -0.566 | -0.544 | -0.501 | 1.92E-67 |
| SERPIND1 | 0.176  | -0.089 | -0.155 | 0.411  | 2.693  | 2.23E-67 |
| PLOD2    | 0.051  | 0.145  | 0.131  | 0.387  | 1.01   | 2.39E-67 |
| GULP1    | -0.262 | -0.265 | -0.671 | -0.942 | -1.418 | 2.62E-67 |
| RIN2     | -0.001 | 0.388  | 0.499  | 0.438  | 0.976  | 2.85E-67 |
| RASSF2   | -0.695 | -0.323 | 0.102  | 0.015  | 0.8    | 4.22E-67 |
| KRT80    | 0.517  | 0.456  | 0.85   | 1.027  | 1.128  | 5.63E-67 |
| NR2F1    | -0.389 | -0.33  | -0.666 | -0.717 | -1.919 | 7.98E-67 |
| SLC16A7  | 0.363  | -0.124 | -0.235 | -0.465 | -1.635 | 9.63E-67 |
| DHRS7    | 0.14   | 0.013  | 0.068  | 0.243  | 1.238  | 1.45E-66 |
| SLBP     | 0.431  | -0.127 | -0.457 | -0.472 | -0.392 | 2.17E-66 |
| CXCL12   | 0.749  | 0.03   | -0.782 | -1     | -3.244 | 2.27E-66 |
| KNTC1    | -0.269 | 0.153  | 0.057  | -0.28  | -0.871 | 2.32E-66 |
| FANCA    | -0.387 | 0.035  | -0.073 | -0.766 | -1.489 | 2.39E-66 |
| OSGIN2   | 0.675  | 0.046  | -0.477 | -0.44  | -0.946 | 3.80E-66 |
| CD93     | 0.329  | -0.055 | -0.064 | 0.358  | 1.162  | 4.34E-66 |
| BIRC3    | 0.633  | 2.139  | 1.267  | 0.358  | 2.021  | 5.89E-66 |
| RAP2B    | 0.568  | 0.249  | 0.35   | 0.606  | 1.129  | 7.09E-66 |
| UBALD2   | -0.054 | -0.001 | 0.268  | 0.596  | 1.333  | 1.21E-65 |
| SLC3A2   | 0.141  | 0.018  | -0.143 | -0.194 | -1.137 | 1.28E-65 |
| STARD13  | -0.085 | 0.055  | 0.342  | 0.281  | 0.789  | 2.19E-65 |
| GAS2L3   | -1.475 | -1.35  | -0.892 | -0.564 | 0.117  | 3.39E-65 |
| KRT18    | 0.144  | 0.055  | 0.283  | 0.841  | 1.452  | 3.50E-65 |
| NR1D2    | 1.366  | 0.218  | -0.069 | 0.577  | 1.054  | 3.95E-65 |
| KLF6     | -0.668 | 0.278  | 0.005  | -0.258 | 0.26   | 4.57E-65 |
| APBB2    | 0.378  | -0.142 | 0.247  | 0.43   | 0.925  | 4.73E-65 |
| LFNG     | 1.201  | -0.621 | -0.234 | -0.285 | 0.611  | 5.23E-65 |
| CCNF     | -1.291 | -0.895 | -0.695 | -0.403 | -0.903 | 5.32E-65 |

|            |        |        |        |        |        |          |
|------------|--------|--------|--------|--------|--------|----------|
| PREX2      | -0.167 | -0.036 | -0.225 | -0.483 | -1.229 | 6.12E-65 |
| UBTD1      | -0.194 | -0.384 | -0.177 | 0.103  | 1.084  | 7.20E-65 |
| NFKBIA     | 1.116  | 0.659  | 0.216  | 0.081  | 0.853  | 1.35E-64 |
| FNDC5      | 0.135  | 0.167  | 0.266  | 0.241  | 3.437  | 1.85E-64 |
| FYN        | 0.224  | 0.026  | 0.256  | 0.505  | 0.992  | 1.87E-64 |
| ORC6       | 0.22   | -0.2   | -0.572 | -0.876 | -1.053 | 2.93E-64 |
| FGF2       | 1.11   | 0.858  | 0.306  | 0.435  | -0.171 | 4.74E-64 |
| TIGAR      | 0.865  | 0.987  | 0.819  | 0.767  | 0.984  | 7.17E-64 |
| AK3        | 0.062  | 0.168  | 0.086  | 0.177  | 0.802  | 7.72E-64 |
| CLDN5      | -0.447 | -0.406 | -0.143 | 0.22   | 1.07   | 9.64E-64 |
| MARCKS     | 0.192  | 0.011  | 0.075  | 0.644  | 1.241  | 1.29E-63 |
| ALDH3A2    | 0.546  | 0.73   | 0.832  | 1.145  | 0.739  | 2.47E-63 |
| USP53      | -0.302 | 0.047  | 0.05   | 0.052  | 0.765  | 2.90E-63 |
| ENC1       | 1.274  | -0.042 | 0.222  | 0.274  | 1.128  | 3.08E-63 |
| FREM3      | 0.033  | -0.273 | -0.822 | -1.49  | -3.147 | 5.52E-63 |
| UHRF1      | 0.826  | -0.163 | -0.763 | -0.764 | -0.698 | 5.58E-63 |
| STOM       | 0.761  | 0.881  | 0.723  | 0.797  | 0.711  | 5.73E-63 |
| TRAM2      | -0.154 | -0.212 | 0.151  | 0.288  | 0.758  | 6.86E-63 |
| CEP85      | -0.428 | -0.336 | -0.426 | -0.768 | -1.183 | 7.05E-63 |
| TSTA3      | -0.105 | -0.01  | 0.066  | 0.021  | 0.779  | 7.93E-63 |
| EXOC6      | -0.512 | -0.412 | -0.816 | -0.525 | -0.99  | 2.29E-62 |
| ARHGAP29   | -0.107 | 0.067  | 0.365  | 0.533  | 0.47   | 2.53E-62 |
| RP5-1039K5 | -0.032 | 0.08   | 0.243  | 0.507  | 1.443  | 2.79E-62 |
| CD34       | -0.042 | 0.042  | 0.015  | 0.261  | 0.73   | 3.28E-62 |
| SAMD1      | 0.579  | -0.223 | -0.827 | -1.082 | -0.565 | 3.28E-62 |
| FGFR3      | 0.696  | 0.003  | -0.765 | -1.193 | -2.527 | 3.43E-62 |
| IDS        | 0.256  | 0.085  | 0.061  | 0.084  | 0.842  | 3.71E-62 |
| C10orf10   | -1.602 | 0.34   | -0.073 | -0.113 | 1.967  | 6.11E-62 |
| EFNB1      | 0.534  | 0.379  | 0.315  | 0.615  | 1.415  | 6.22E-62 |
| CDH13      | 0.127  | 0.06   | -0.007 | 0.434  | 1.13   | 6.37E-62 |
| DDIT4L     | 0.369  | 0.586  | 0.699  | 0.788  | 2.917  | 7.34E-62 |
| APLN       | -1.27  | -0.018 | 0.865  | 1.041  | 2.279  | 1.18E-61 |
| HTR1B      | -0.507 | -0.147 | -0.553 | -0.526 | -2.017 | 1.45E-61 |
| RFC3       | 0.258  | 0.165  | -0.461 | -0.432 | -0.841 | 1.60E-61 |
| FGFR1      | 0.059  | -0.094 | -0.128 | 0.015  | 0.787  | 2.61E-61 |
| MCTP1      | -0.035 | 0.126  | -0.424 | -0.728 | -1.369 | 3.25E-61 |
| SRPRB      | 0.149  | -0.157 | -0.249 | -0.24  | -0.797 | 4.26E-61 |
| GRASP      | 0.984  | -0.013 | -0.085 | -0.238 | -0.314 | 1.08E-60 |

|            |        |        |        |        |        |          |
|------------|--------|--------|--------|--------|--------|----------|
| EGLN1      | 0.209  | 0.192  | 0.133  | 0.507  | 1.049  | 1.48E-60 |
| ADD3       | 0.071  | 0.175  | 0.409  | 0.655  | 1.583  | 1.72E-60 |
| CCNJL      | -0.431 | -0.053 | 0.181  | 0.552  | 1.086  | 2.72E-60 |
| ARHGEF28   | -0.381 | 0.012  | 0.256  | 0.062  | 0.415  | 2.72E-60 |
| INSC       | 0.355  | 0.046  | 0.658  | 1.137  | 2.4    | 2.75E-60 |
| FKBP1A     | 0.268  | 0.074  | -0.003 | 0.245  | 0.799  | 2.99E-60 |
| AGRN       | 0.041  | 0.265  | 0.372  | 0.447  | 1.275  | 6.28E-60 |
| CERK       | 0.232  | -0.28  | 0.123  | 0.406  | 0.647  | 8.28E-60 |
| CMTM7      | 0.198  | -0.246 | 0.108  | 0.319  | 0.893  | 8.30E-60 |
| TMEM154    | 0.3    | -0.229 | -0.202 | 0.074  | 1.685  | 8.72E-60 |
| TIMP2      | 0.188  | 0.02   | 0.065  | 0.453  | 1.358  | 9.59E-60 |
| CDC20P     | -0.866 | -1.927 | -1.653 | -0.776 | -0.657 | 9.74E-60 |
| RNF19B     | 0.929  | 0.654  | 0.618  | 0.698  | 1.33   | 1.10E-59 |
| FAM46A     | 1.02   | 0.669  | 0.152  | 0.079  | 0.076  | 1.50E-59 |
| IDI1       | 0.31   | -0.401 | -0.877 | -1.05  | -0.374 | 1.68E-59 |
| MAML3      | 0.767  | -0.493 | 0.556  | 0.888  | 1.245  | 1.97E-59 |
| CCND1      | 0.182  | 0.036  | 0.269  | 0.607  | 0.925  | 2.17E-59 |
| PHF19      | -0.433 | -0.584 | -0.518 | -0.445 | -1.105 | 2.28E-59 |
| SQLE       | 0.314  | -0.437 | -0.735 | -0.559 | 0.162  | 2.29E-59 |
| MYCBPAP    | -0.587 | 0.441  | 1.538  | 0.932  | 2.55   | 2.47E-59 |
| HELLS      | 0.074  | 0.357  | -0.262 | -0.368 | -0.982 | 2.54E-59 |
| MSMO1      | 0.227  | -0.503 | -0.949 | -1.014 | -0.138 | 2.69E-59 |
| NEBL       | 0.379  | -0.052 | -0.416 | -0.616 | -1.344 | 3.13E-59 |
| CTSK       | 0.175  | 0.331  | 0.277  | -0.022 | 1.581  | 3.76E-59 |
| INPP4B     | -0.789 | 0.465  | 0.148  | 0.616  | 1.703  | 6.47E-59 |
| EPHB2      | 0.226  | -0.199 | -0.071 | 0.444  | 1.161  | 7.20E-59 |
| TAP1       | 0.328  | 0.938  | 0.922  | 0.902  | 1.261  | 7.24E-59 |
| RP11-536O1 | 0.026  | -0.356 | -0.06  | 0.2    | 2.021  | 9.54E-59 |
| SYNE1      | 0.117  | 0.355  | 0.565  | 0.783  | 1.117  | 1.06E-58 |
| TSKU       | 1.372  | 0.639  | 0.733  | 0.778  | 1.301  | 1.07E-58 |
| WNK4       | 0.031  | 0.064  | 0.551  | 0.494  | 1.331  | 1.14E-58 |
| BRIP1      | 0.281  | 0.33   | -0.149 | -0.477 | -0.777 | 1.94E-58 |
| CDH5       | 0.296  | 0.123  | 0.162  | 0.555  | 1.134  | 3.49E-58 |
| ZNF618     | 0.114  | -0.319 | 0.018  | 0.319  | 0.883  | 3.79E-58 |
| FAM129B    | 0.17   | -0.088 | 0.123  | 0.515  | 1.03   | 3.87E-58 |
| CTGF       | 0.08   | 0.015  | -0.302 | -0.351 | -0.983 | 6.56E-58 |
| FGF16      | -0.12  | -0.09  | 0.293  | 0.444  | 2.89   | 7.73E-58 |
| NEDD4L     | 0.666  | -0.074 | -0.007 | 0.296  | 1.058  | 1.04E-57 |

|          |        |        |        |        |        |          |
|----------|--------|--------|--------|--------|--------|----------|
| RFC5     | 0.083  | 0.035  | -0.212 | -0.299 | -0.96  | 1.56E-57 |
| ACAT2    | 0.214  | -0.227 | -0.528 | -0.654 | -0.796 | 1.70E-57 |
| KALRN    | -0.187 | 0.035  | 0.494  | 0.52   | 1.866  | 1.71E-57 |
| STEAP2   | -0.994 | -0.513 | -0.775 | -1.012 | -1.371 | 1.94E-57 |
| TNFSF9   | 2.12   | 2.236  | 1.847  | 1.801  | 1.995  | 1.96E-57 |
| AEN      | 0.911  | 0.583  | 0.709  | 0.44   | 0.787  | 2.13E-57 |
| TNFRSF14 | -0.287 | 0.599  | 1.079  | 0.845  | 1.149  | 2.24E-57 |
| SLC9A3R2 | 0.371  | -0.15  | -0.443 | -0.413 | -0.862 | 2.29E-57 |
| PLPP3    | 0.867  | -0.009 | -0.445 | 0.031  | -0.144 | 2.41E-57 |
| PODXL    | 0.579  | -0.047 | -0.282 | -0.009 | 1.023  | 2.67E-57 |
| COL17A1  | 0.015  | 0.148  | 0.705  | 0.634  | 2.376  | 4.37E-57 |
| ANGPTL4  | 0.035  | 0.031  | 0.983  | 1.277  | 1.391  | 4.46E-57 |
| TMCC3    | -0.115 | 0.009  | 0.286  | 0.41   | 1.335  | 5.22E-57 |
| UNC13B   | 0.042  | 0.175  | 0.472  | 0.576  | 0.636  | 5.75E-57 |
| GIN3     | 0.522  | -0.1   | -0.488 | -0.332 | -0.939 | 6.16E-57 |
| PHLDA1   | -0.402 | 0.16   | 0.256  | 0.121  | 0.948  | 6.32E-57 |
| JUNB     | 1.358  | 0.862  | 0.048  | -0.017 | 1.115  | 7.01E-57 |
| RAB33B   | 0.246  | 0.295  | 0.571  | 0.517  | 1.06   | 7.21E-57 |
| PCNA     | 0.474  | 0.599  | 0.35   | -0.004 | -0.305 | 9.01E-57 |
| ETS2     | 0.338  | 0.42   | 0.334  | 0.359  | 1.136  | 9.03E-57 |
| PLXNB2   | 0.536  | 0.99   | 0.963  | 0.561  | 0.882  | 1.51E-56 |
| EXOSC9   | 0.132  | 0.066  | -0.195 | -0.371 | -0.824 | 1.92E-56 |
| MMP1     | 0.188  | 0.008  | -0.019 | 0.382  | 1.212  | 2.12E-56 |
| CSDAP1   | 0.394  | 0.396  | 0.644  | 0.859  | 1.131  | 2.38E-56 |
| MCC      | 0.235  | 0.077  | 0.231  | 0.639  | 1.098  | 2.50E-56 |
| PDCD1LG2 | -0.207 | 0.191  | 0.421  | 0.708  | 0.816  | 3.19E-56 |
| SLC9A7   | -0.089 | -0.139 | 0.319  | 0.503  | 1.439  | 3.31E-56 |
| SAP30L   | 0.08   | 0.138  | 0.095  | 0.235  | 0.914  | 5.53E-56 |
| CLMN     | 0.233  | 0.034  | 0.915  | 0.878  | 2.073  | 8.52E-56 |
| IER5     | 1.026  | 0.629  | 0.739  | 0.848  | 1.374  | 8.61E-56 |
| CCDC69   | 0.074  | 0.18   | 0.398  | 0.674  | 1.399  | 1.36E-55 |
| DUSP6    | -1.143 | -0.118 | -0.237 | -0.331 | -0.209 | 1.42E-55 |
| FEN1     | 0.472  | 0.167  | -0.181 | -0.136 | -0.956 | 1.46E-55 |
| NPAS2    | -0.016 | -0.149 | 0.269  | 0.488  | 1.254  | 1.62E-55 |
| FLT1     | 0.478  | -0.075 | -0.503 | -0.318 | -1.467 | 1.78E-55 |
| MPST     | -0.161 | -0.188 | -0.049 | 0.196  | 0.804  | 2.05E-55 |
| KIF18B   | -1.02  | -0.798 | -0.54  | -0.776 | -1.499 | 2.22E-55 |
| DKK1     | 0.409  | 0.302  | -0.019 | 0.051  | -0.889 | 2.38E-55 |

|          |        |        |        |        |        |          |
|----------|--------|--------|--------|--------|--------|----------|
| SGO2     | -0.893 | -1.135 | -1.112 | -0.569 | -0.783 | 3.04E-55 |
| TMEM37   | 0.087  | -0.65  | -0.977 | -1.057 | -2.891 | 3.20E-55 |
| WDR26    | 0.019  | 0.148  | 0.181  | 0.211  | 0.648  | 4.41E-55 |
| CTSB     | 0.246  | 0.054  | 0.004  | 0.405  | 0.971  | 5.72E-55 |
| MTMR10   | -0.234 | 0.049  | -0.201 | -0.403 | -1.054 | 6.34E-55 |
| GPSM2    | -1.081 | -1.468 | -0.869 | -0.259 | 0.083  | 6.44E-55 |
| TBC1D4   | -0.03  | -0.1   | -0.386 | -0.706 | -1.055 | 1.02E-54 |
| TSPAN14  | 0.154  | -0.282 | -0.013 | 0.22   | 0.671  | 1.12E-54 |
| NOP56    | -0.272 | -0.183 | -0.225 | -0.555 | -0.906 | 1.20E-54 |
| HN1      | 0.103  | -0.278 | -0.373 | -0.107 | 0.412  | 1.48E-54 |
| USP37    | 0.492  | 0.152  | -0.257 | -0.59  | -0.725 | 1.65E-54 |
| HEY2     | 1.175  | -0.446 | -0.329 | 0.153  | -1.524 | 1.69E-54 |
| LTF      | -0.264 | -0.692 | 0.203  | 0.506  | 1.675  | 2.35E-54 |
| SMAD9    | 1.256  | -0.21  | -0.574 | -0.431 | -1.351 | 2.54E-54 |
| IL4I1    | -0.032 | 0.639  | 0.856  | 1.265  | 2.175  | 2.55E-54 |
| TBC1D5   | 0.488  | 0.061  | 0.224  | 0.778  | 1.184  | 2.55E-54 |
| DLL4     | -1.421 | -0.079 | -0.042 | 0.022  | 0.448  | 2.57E-54 |
| ADGRA2   | 0.06   | -0.12  | -0.154 | 0.031  | 0.941  | 2.63E-54 |
| FAM89B   | 0.201  | -0.127 | -0.163 | -0.141 | 0.683  | 2.69E-54 |
| DEPDC1   | -1.194 | -1.64  | -1.389 | -1.112 | -0.643 | 3.17E-54 |
| TIMELESS | 0.006  | 0.037  | -0.07  | -0.116 | -0.819 | 3.89E-54 |
| SH2D2A   | 0.23   | 0.444  | 0.93   | 1.309  | 2.47   | 3.98E-54 |
| CAV1     | -0.221 | 0.049  | 0.249  | 0.554  | 1.076  | 3.98E-54 |
| KIF18A   | -0.895 | -1.408 | -1.215 | -0.465 | -0.355 | 4.41E-54 |
| BUB1     | -0.659 | -1.189 | -1.047 | -0.361 | -0.228 | 4.73E-54 |
| CENPA    | -1.959 | -1.654 | -1.115 | -0.623 | -0.843 | 6.40E-54 |
| HIVEP2   | 1.96   | 1.702  | 0.902  | 0.484  | 2.073  | 6.42E-54 |
| EIF3F    | 0.069  | 0.195  | 0.225  | 0.348  | 0.965  | 6.42E-54 |
| CD274    | -1.229 | 0.046  | -0.009 | -0.447 | -0.201 | 1.37E-53 |
| PMEPA1   | 0.753  | -0.171 | -0.357 | 0.388  | 1.39   | 1.98E-53 |
| FAR2     | 0.325  | -0.064 | -0.103 | 0.334  | 1.364  | 2.59E-53 |
| SLC9A1   | 0.528  | 0.908  | 0.867  | 0.988  | 1.394  | 3.18E-53 |
| DUSP5    | -0.042 | 0.678  | 0.517  | 0.374  | 1.027  | 4.03E-53 |
| GAL3ST4  | 0.518  | 1.024  | 1.342  | 1.784  | 2.303  | 5.13E-53 |
| CCNB2    | -0.564 | -1.02  | -1.08  | -0.587 | -0.315 | 5.17E-53 |
| GLT25D1  | 0.094  | 0.126  | 0.092  | 0.153  | 0.754  | 6.05E-53 |
| YPEL2    | -0.29  | 0.484  | 0.069  | 0.117  | 0.939  | 6.97E-53 |
| CASP3    | 0.098  | 0.271  | 0.344  | 0.542  | 0.909  | 7.52E-53 |

|          |        |        |        |        |        |          |
|----------|--------|--------|--------|--------|--------|----------|
| MCMBP    | 0.427  | -0.055 | -0.527 | -0.328 | -0.316 | 7.61E-53 |
| STAP2    | -0.138 | 0.39   | 0.919  | 0.727  | 2.356  | 8.58E-53 |
| SPC25    | -0.399 | -0.313 | -0.249 | 0.081  | -1.426 | 9.51E-53 |
| CDC42EP3 | -0.473 | 0.29   | 0.381  | 0.389  | 0.739  | 1.18E-52 |
| SCARB2   | 0.215  | 0.098  | 0.003  | 0.342  | 0.891  | 1.35E-52 |
| SDC1     | 0.418  | 1.19   | 1.271  | 1.696  | 2.248  | 1.38E-52 |
| TSC22D1  | 0.426  | 0.323  | 0.412  | 0.657  | 0.92   | 1.42E-52 |
| CRYAB    | 0.306  | -0.092 | -0.288 | -0.169 | -2.12  | 1.96E-52 |
| BST2     | -0.116 | -0.166 | -0.036 | 0.178  | 0.692  | 2.11E-52 |
| CENPE    | -0.984 | -0.571 | -0.628 | -0.143 | 0.129  | 2.59E-52 |
| FMNL2    | -0.129 | -0.029 | 0.554  | 0.346  | 1.16   | 3.48E-52 |
| PRNP     | 0.231  | -0.056 | -0.202 | 0.094  | 0.722  | 3.95E-52 |
| BARD1    | 0.126  | -0.195 | -0.416 | -0.46  | -1.042 | 3.95E-52 |
| NCAPH2   | 0.168  | 0.123  | -0.031 | -0.157 | -0.885 | 4.97E-52 |
| EPHX4    | -0.132 | 0.173  | 0.561  | 1.26   | 3.134  | 5.05E-52 |
| CDH2     | 0.466  | 0.151  | -0.159 | 0.274  | 1.23   | 5.36E-52 |
| QSOX1    | 0.141  | 0.004  | 0.017  | 0.372  | 1.101  | 1.04E-51 |
| SLC5A6   | -0.172 | -0.183 | -0.271 | -0.485 | -0.862 | 1.11E-51 |
| PRKX     | 0.036  | 0.421  | 0.445  | 0.414  | 0.862  | 1.14E-51 |
| BDNF     | -0.059 | 0.212  | -0.424 | -0.182 | -1.452 | 1.24E-51 |
| DEPDC1B  | -0.96  | -1.083 | -0.913 | -0.667 | -1.498 | 1.26E-51 |
| PTPRM    | 0.035  | -0.061 | 0.003  | -0.068 | 1.037  | 1.34E-51 |
| SOD2     | 0.192  | 0.439  | 0.226  | 0.268  | 1.227  | 1.45E-51 |
| MEX3B    | 0.362  | 0.14   | 0      | 0.334  | 2.127  | 1.57E-51 |
| GLS      | -0.044 | -0.021 | 0.104  | 0.202  | 0.655  | 1.73E-51 |
| PIF1     | -2.384 | -2.239 | -1.326 | -1.384 | -1.354 | 1.73E-51 |
| SSBP3    | 0.385  | -0.165 | -0.046 | 0.356  | 0.937  | 2.37E-51 |
| PPM1F    | -0.125 | -0.307 | 0.148  | 0.351  | 0.705  | 2.38E-51 |
| DGAT2    | -0.424 | -0.484 | 0.36   | 0.764  | 1.905  | 2.42E-51 |
| STX3     | 0.803  | 0.147  | 0.071  | 0.138  | 0.383  | 2.63E-51 |
| SAV1     | 1.106  | 0.424  | 0.011  | 0.147  | 0.294  | 3.06E-51 |
| ITGA6    | 0.201  | 0.076  | 0.084  | 0.503  | 1.102  | 3.11E-51 |
| TMEM200A | 0.357  | 0.131  | -0.28  | 0.032  | 1.126  | 4.02E-51 |
| SLC7A2   | 0.976  | 1.278  | 0.64   | 0.136  | 0.018  | 4.29E-51 |
| CRY2     | 0.095  | 0.069  | -0.529 | -1.183 | -0.82  | 6.50E-51 |
| PRRG1    | 0.132  | 0.229  | -0.032 | 0.036  | 0.86   | 6.58E-51 |
| DDIT4    | -0.479 | -0.155 | 0.372  | 0.501  | 0.767  | 6.93E-51 |
| HERC4    | -0.32  | 0.002  | 0.306  | 0.4    | 0.433  | 7.74E-51 |



|            |        |        |        |        |        |          |
|------------|--------|--------|--------|--------|--------|----------|
| BMF        | 0.498  | 0.602  | 0.679  | 0.186  | 2.142  | 8.36E-51 |
| TRIM21     | 0.096  | 0.51   | 0.669  | 0.986  | 1.25   | 8.98E-51 |
| RNF41      | -0.048 | -0.01  | -0.306 | -0.261 | -0.926 | 9.63E-51 |
| ATF6B      | -0.153 | 0.008  | 0.061  | 0.315  | 0.697  | 1.23E-50 |
| PHLPP2     | 0.676  | 0.131  | -0.148 | -0.558 | -0.074 | 1.29E-50 |
| PINK1      | -0.115 | -0.013 | 0.153  | 0.294  | 0.742  | 1.49E-50 |
| ARHGEF7    | -0.352 | 0.084  | 0.18   | 0.124  | 0.596  | 1.50E-50 |
| BOK        | 0.194  | 0.013  | 0.223  | 0.45   | 0.971  | 1.54E-50 |
| GIN52      | -0.074 | -0.23  | -0.534 | -1.023 | -1.288 | 1.54E-50 |
| MBNL2      | 0.516  | 0.113  | 0.342  | 0.786  | 1.131  | 2.01E-50 |
| OAF        | 0.188  | -0.079 | -0.109 | 0.231  | 0.931  | 2.10E-50 |
| RP11-286H1 | 0.083  | 0.208  | -0.447 | -1.183 | -2.932 | 2.32E-50 |
| SLC27A3    | -0.576 | -0.145 | -0.219 | -0.718 | -1.36  | 3.04E-50 |
| DBN1       | 0.031  | -0.173 | -0.069 | 0.178  | 0.76   | 3.11E-50 |
| EDA2R      | 0.797  | 1.272  | 1.287  | 0.679  | 1.219  | 3.25E-50 |
| CASP1      | -0.067 | 0.361  | 0.956  | 1.02   | 2.191  | 3.31E-50 |
| GJA5       | 0.594  | -0.655 | -1.596 | -1.354 | -3.065 | 3.31E-50 |
| RETSAT     | 0.161  | 0.335  | 0.43   | 0.515  | 0.687  | 3.34E-50 |
| KLF13      | 1.157  | -0.084 | 0.337  | 0.692  | 0.809  | 3.85E-50 |
| SYNC       | 0.228  | 0.473  | 0.854  | 0.938  | 1.418  | 3.94E-50 |
| RP11-443P1 | -0.247 | 0.396  | 0.09   | -0.6   | -1.784 | 4.73E-50 |
| SH2D3C     | -0.561 | -0.118 | 0.344  | 0.472  | 0.804  | 5.79E-50 |
| SRSF7      | 0.137  | -0.192 | -0.332 | -0.614 | -0.664 | 6.18E-50 |
| ATOH8      | 1.326  | -0.402 | -0.24  | 0.105  | -0.534 | 6.25E-50 |
| WDR62      | -0.331 | -0.274 | -0.222 | -0.579 | -1.37  | 6.85E-50 |
| DMD        | 0.066  | 0.016  | 0.188  | 0.235  | -1.128 | 7.01E-50 |
| SNED1      | 0.2    | 0.06   | 0.196  | 0.311  | 1.189  | 8.59E-50 |
| KIF20A     | -0.925 | -1.674 | -1.54  | -0.572 | -0.283 | 8.60E-50 |
| RFC4       | 0.195  | -0.11  | -0.26  | -0.356 | -0.847 | 9.90E-50 |
| ARRB1      | 0.059  | 0.096  | 0.555  | 0.71   | 1.405  | 1.06E-49 |
| PPP2R3A    | 0.228  | 0.221  | 0.241  | 0.293  | 1.361  | 1.20E-49 |
| EIF2B2     | 0.388  | -0.03  | -0.023 | 0.386  | 0.934  | 1.21E-49 |
| PTPRU      | 0.314  | 0.07   | -0.001 | 0.205  | 1.254  | 1.33E-49 |
| AC008268.3 | -0.777 | -0.067 | 0.228  | -1.157 | -2.107 | 1.66E-49 |
| SLC12A2    | -0.039 | 0.159  | -0.077 | -0.244 | 0.727  | 2.04E-49 |
| ID2        | 1.777  | -0.006 | 0.227  | 0.29   | -1.252 | 2.08E-49 |
| SMURF2     | 0.464  | -0.067 | 0.166  | 0.121  | 0.963  | 2.18E-49 |
| SEMA7A     | 0.305  | 0.378  | -0.005 | -0.397 | 1.962  | 2.22E-49 |

|           |        |        |        |        |        |          |
|-----------|--------|--------|--------|--------|--------|----------|
| PNRC1     | 0.345  | 0.705  | 0.454  | 0.546  | 1.443  | 2.44E-49 |
| ST6GAL1   | -0.1   | -0.004 | 0.228  | 0.395  | 1.104  | 3.02E-49 |
| PARD3B    | -0.142 | -0.177 | 0.229  | 0.306  | 0.952  | 3.02E-49 |
| CHMP1B    | 0.488  | 0.282  | 0.164  | 0.441  | 0.86   | 4.03E-49 |
| GCHFR     | -0.169 | -0.015 | 0.109  | -0.09  | 2.012  | 4.21E-49 |
| ARSD      | 0.347  | 0.109  | 0.155  | 0.541  | 1.156  | 6.20E-49 |
| SEPT11    | 0.327  | 0.121  | 0.065  | 0.377  | 1.07   | 6.69E-49 |
| CAMKK2    | -0.046 | 0.088  | 0.243  | 0.296  | 0.683  | 6.94E-49 |
| MAFG      | 0.337  | 0.219  | 0.015  | -0.326 | -0.376 | 7.85E-49 |
| CCL2      | -0.31  | 1.245  | 0.886  | 0.285  | 2.573  | 8.58E-49 |
| JAG2      | 0.454  | -0.321 | -0.637 | -0.732 | -1.002 | 9.08E-49 |
| SNX9      | 0.343  | 0.156  | 0.171  | 0.357  | 0.932  | 1.03E-48 |
| ZSWIM5    | 0.38   | -0.215 | -0.832 | -0.925 | -1.594 | 1.03E-48 |
| SPHK1     | 0.656  | 0.354  | 0.268  | 0.052  | 1.037  | 1.04E-48 |
| NUAK2     | 0.625  | 1.12   | 0.146  | -0.099 | 2.459  | 1.06E-48 |
| NLRC3     | 0.547  | -0.32  | 0.53   | 0.836  | 1.718  | 1.27E-48 |
| EXTL3     | 0.059  | -0.169 | -0.064 | 0.319  | 0.911  | 1.49E-48 |
| CCNA2     | -0.504 | -0.78  | -0.736 | -0.267 | -0.755 | 1.76E-48 |
| ROBO4     | -0.093 | -0.147 | 0.1    | 0.415  | 0.791  | 1.86E-48 |
| PRADC1    | -0.246 | -0.393 | -0.494 | -0.651 | -1.355 | 2.26E-48 |
| ST3GAL5   | 0.317  | -0.282 | 0.102  | 0.475  | 1.286  | 2.41E-48 |
| FUCA1     | 0.148  | 0.56   | 0.735  | 0.95   | 1.594  | 2.81E-48 |
| TENM3     | 0.152  | -0.008 | 0.201  | 0.677  | 1.38   | 2.92E-48 |
| NLK       | -0.222 | 0.043  | 0.156  | 0.101  | 0.648  | 3.19E-48 |
| CTXN1     | -0.253 | -0.156 | -0.074 | 0.138  | 1.696  | 3.39E-48 |
| SCD5      | -0.035 | -0.274 | -0.179 | 0.121  | 0.747  | 3.56E-48 |
| KIAA1324L | 0.099  | 0.182  | 0.198  | 0.509  | 0.953  | 4.38E-48 |
| SRSF1     | 0.232  | -0.044 | -0.204 | -0.147 | -0.354 | 5.92E-48 |
| KIAA0319L | -0.026 | 0.091  | 0.159  | 0.383  | 0.746  | 6.02E-48 |
| CDK2      | 0.229  | 0.169  | -0.208 | -0.292 | -0.532 | 7.60E-48 |
| TRAF3IP2  | -0.336 | -0.164 | 0.344  | 0.873  | 1.162  | 9.36E-48 |
| MTCL1     | 0.633  | -0.193 | -0.262 | -0.597 | -0.804 | 1.10E-47 |
| CLDN14    | 1.198  | 1.063  | 1.359  | 1.657  | 2.87   | 1.25E-47 |
| PXDN      | 0.305  | 0.186  | 0.124  | 0.512  | 1.358  | 1.51E-47 |
| TMEM100   | 0.238  | -0.713 | -1.758 | -2.047 | -3.216 | 2.04E-47 |
| ARHGAP26  | 0.212  | -0.104 | 0.254  | 0.315  | 1.202  | 2.27E-47 |
| SMG6      | -0.002 | 0.26   | 0.254  | 0.466  | 1.089  | 2.53E-47 |
| FBXL7     | -0.4   | -0.191 | -0.139 | -0.043 | 0.831  | 2.84E-47 |

|           |        |        |        |        |        |          |
|-----------|--------|--------|--------|--------|--------|----------|
| SNCA      | 0.028  | -0.162 | -0.281 | -0.138 | -0.969 | 2.92E-47 |
| DPF1      | -0.029 | 0.066  | -0.332 | -0.648 | -1.749 | 3.39E-47 |
| RUNX1T1   | 0.886  | -0.443 | -0.598 | -0.424 | -0.423 | 3.61E-47 |
| GPRC5B    | -0.108 | 0.48   | 0.368  | 0.514  | 1.36   | 3.85E-47 |
| TNFRSF10B | 0.268  | 0.646  | 0.424  | 0.098  | 0.79   | 3.93E-47 |
| TTK       | -0.795 | -0.904 | -0.851 | -0.191 | -0.319 | 4.28E-47 |
| NID2      | 0.549  | 0.329  | 0.038  | 0.325  | 1.658  | 5.60E-47 |
| DOCK6     | 0.138  | -0.026 | 0.256  | 0.11   | 0.821  | 6.20E-47 |
| ADGRF5    | 0.018  | 0.04   | -0.008 | 0.298  | 1.765  | 6.44E-47 |
| NPR1      | -0.123 | -0.069 | -0.271 | -0.252 | -2.008 | 7.77E-47 |
| RPS6KA5   | 0.836  | -0.031 | -0.089 | -0.295 | -1.319 | 1.24E-46 |
| BST1      | -0.425 | -0.122 | 0.082  | 0.53   | 0.952  | 1.68E-46 |
| VSIR      | 0.12   | 0.081  | 0.26   | 0.822  | 1.173  | 1.81E-46 |
| EPB41L3   | 0.409  | 0.219  | 0.236  | 0.735  | 1.416  | 1.85E-46 |
| TNFAIP8L3 | 0.953  | -0.172 | -0.419 | -0.276 | 0.101  | 2.06E-46 |
| TGFBR2    | -0.134 | -0.081 | 0.064  | 0.292  | 0.815  | 2.14E-46 |
| SLC35F2   | -0.066 | -0.268 | -0.127 | -0.077 | 0.518  | 2.34E-46 |
| TBX18     | -0.688 | -0.212 | -0.663 | -0.743 | -1.089 | 2.41E-46 |
| CDKN2C    | -0.494 | -0.742 | -0.661 | -0.237 | -1.402 | 2.99E-46 |
| TFAP2A    | 0.985  | 0.717  | -0.376 | -0.773 | -2.085 | 3.66E-46 |
| GJC1      | 0.656  | 0.231  | -0.03  | -0.214 | -0.065 | 4.34E-46 |
| RPS6KA3   | 0.206  | -0.079 | -0.017 | 0.225  | 0.699  | 4.58E-46 |
| RRM2      | 0.481  | 0.348  | 0.207  | 0.341  | -0.84  | 4.75E-46 |
| PTPRE     | -0.112 | 0.004  | 0.378  | 0.315  | 0.876  | 5.61E-46 |
| MMP10     | 0.42   | 0.171  | -0.061 | 0.226  | 0.935  | 6.15E-46 |
| DNA2      | -0.079 | 0.118  | -0.191 | -0.358 | -1.222 | 6.22E-46 |
| MEX3D     | 0.257  | 0.07   | -0.317 | 0.028  | 0.957  | 7.16E-46 |
| TMEM97    | 0.172  | -0.113 | -0.48  | -0.52  | -0.649 | 7.88E-46 |
| DHCR24    | 0.205  | -0.324 | -0.75  | -0.869 | -0.496 | 8.12E-46 |
| EVA1A     | -0.47  | -0.329 | 0.11   | 0.462  | 0.956  | 8.16E-46 |
| C4orf46   | 0.072  | -0.367 | -0.539 | -0.408 | -0.811 | 8.49E-46 |
| TRA2B     | -0.035 | -0.148 | -0.276 | -0.351 | -0.8   | 8.71E-46 |
| GALNT1    | 0.068  | 0.228  | 0.279  | 0.596  | 0.861  | 1.02E-45 |
| C1QTNF1   | 0.223  | -0.201 | -0.212 | 0.24   | 1.377  | 1.28E-45 |
| SNPH      | -0.699 | -0.745 | -0.138 | 0.193  | 0.449  | 1.41E-45 |
| NEK2      | -0.927 | -1.25  | -1.247 | -0.428 | -0.03  | 1.42E-45 |
| TM7SF3    | -0.006 | -0.011 | 0.153  | 0.403  | 0.658  | 1.62E-45 |
| ZC3H7B    | 0.04   | 0.144  | 0.199  | 0.335  | 0.898  | 1.66E-45 |

|            |        |        |        |        |        |          |
|------------|--------|--------|--------|--------|--------|----------|
| DMTN       | -0.035 | -0.03  | 0.033  | 0.342  | 1.464  | 1.70E-45 |
| SQSTM1     | 0.163  | 0.662  | 0.472  | 0.484  | 1.064  | 1.96E-45 |
| UBE2J1     | 0.399  | 0.023  | -0.008 | 0.155  | 0.599  | 2.01E-45 |
| LMO7       | -0.061 | -0.054 | -0.616 | -0.605 | -1.076 | 2.17E-45 |
| RP11-874J1 | -0.865 | 0.032  | 0.63   | 0.299  | 1.653  | 2.19E-45 |
| GATA2      | 0.703  | -0.471 | -0.245 | -0.038 | -0.682 | 2.21E-45 |
| CDC42BPA   | 0.243  | -0.022 | 0.246  | 0.512  | 0.99   | 2.33E-45 |
| ATP2B1     | 0.254  | 0.017  | -0.591 | -0.666 | -0.738 | 2.69E-45 |
| PDE4B      | -0.5   | 0.32   | -0.073 | -0.26  | 0.318  | 2.74E-45 |
| CHAF1A     | 0.453  | 0.004  | -0.464 | -0.548 | -0.718 | 2.76E-45 |
| CES2       | 0.419  | 0.687  | 0.776  | 0.872  | 0.87   | 2.85E-45 |
| LIPG       | 0.625  | -0.232 | -0.804 | -0.685 | -2.105 | 2.87E-45 |
| FAM117A    | 0.223  | -0.319 | -0.633 | -0.608 | -1.603 | 2.92E-45 |
| CASP8AP2   | 0.241  | 0.054  | -0.27  | -0.614 | -0.495 | 3.06E-45 |
| TMEM255B   | -0.004 | -0.041 | 0.079  | 0.114  | 0.618  | 3.15E-45 |
| TNFAIP1    | 0.195  | 0.381  | 0.304  | 0.468  | 0.963  | 4.43E-45 |
| RNF44      | -0.034 | 0.128  | 0.348  | 0.355  | 0.947  | 4.50E-45 |
| PTK2       | 0.209  | -0.065 | 0.171  | 0.521  | 0.688  | 4.53E-45 |
| PCDH7      | 0.269  | -0.415 | -1.112 | -1.081 | -2.279 | 4.72E-45 |
| DPYSL2     | 0.338  | -0.101 | 0.249  | 0.824  | 1.377  | 4.87E-45 |
| PDE3A      | -0.427 | 0.181  | 0.074  | -0.047 | -0.83  | 5.19E-45 |
| H1FO       | -0.194 | -0.798 | -0.386 | 0.026  | -0.898 | 5.35E-45 |
| NIPAL3     | 0.127  | 0.252  | 0.483  | 0.81   | 0.777  | 5.68E-45 |
| CTD-2568A1 | 0.059  | -0.091 | -0.341 | -0.488 | -0.654 | 5.81E-45 |
| AURKB      | -0.801 | -0.663 | -0.378 | -0.245 | -1.125 | 5.85E-45 |
| CHMP4B     | 0.306  | 0.198  | 0.197  | 0.585  | 1.01   | 5.90E-45 |
| PDLIM1     | 0.293  | 0.379  | 0.476  | 1.022  | 1.408  | 6.18E-45 |
| RP11-284F2 | -0.367 | 0.085  | 1.277  | 1.595  | 2.456  | 6.46E-45 |
| SLC44A1    | 0.311  | 0.005  | -0.259 | -0.036 | -0.656 | 6.74E-45 |
| PARP9      | 0.05   | 0.219  | 0.478  | 0.856  | 1.242  | 6.80E-45 |
| MAGI1      | 0.087  | 0.139  | -0.181 | -0.399 | 0.93   | 6.98E-45 |
| SLX4       | -0.573 | -0.117 | -0.083 | -0.311 | -1.023 | 7.02E-45 |
| UBA7       | -0.206 | 0.146  | 0.505  | 0.205  | 1.343  | 8.07E-45 |
| FJX1       | -0.721 | -0.461 | -0.252 | -0.062 | 0.507  | 8.39E-45 |
| ICAM2      | -0.259 | -0.171 | 0.195  | 0.628  | 0.803  | 9.20E-45 |
| RCN1       | 0.222  | 0.256  | 0.216  | 0.533  | 0.858  | 1.07E-44 |
| SPAAR      | -0.504 | -0.486 | -0.434 | -0.221 | -1.254 | 1.12E-44 |
| CDYL       | 0.084  | -0.001 | 0.094  | 0.426  | 1.031  | 1.22E-44 |

|            |        |        |        |        |        |          |
|------------|--------|--------|--------|--------|--------|----------|
| INPP5D     | -0.19  | -0.44  | 0.236  | 0.686  | 0.79   | 1.22E-44 |
| ZC3H12C    | 0.981  | 0.48   | 0.379  | 0.326  | 0.853  | 1.33E-44 |
| RBMX       | 0.136  | -0.005 | -0.107 | -0.148 | -0.432 | 1.35E-44 |
| MAOA       | 0.196  | -0.101 | -0.418 | -0.229 | -2.023 | 1.37E-44 |
| HSD17B2    | -0.284 | -0.296 | -0.018 | 0.389  | 0.725  | 2.14E-44 |
| RASSF8     | 0.627  | 0.169  | 0.059  | 0.384  | 0.847  | 2.46E-44 |
| FIG4       | 0.044  | 0.226  | 0.391  | 0.755  | 0.998  | 2.60E-44 |
| DOT1L      | 0.019  | 0.025  | -0.152 | -0.531 | -0.83  | 3.25E-44 |
| NREP       | -0.151 | -0.184 | 0.131  | 0.269  | 1.014  | 3.30E-44 |
| TIPIN      | 0.266  | 0.014  | -0.34  | -0.488 | -1.044 | 3.40E-44 |
| CDCA8      | -0.947 | -1.042 | -0.95  | -0.391 | -0.772 | 3.67E-44 |
| SSFA2      | 0.034  | -0.139 | -0.078 | 0.03   | 0.552  | 4.03E-44 |
| CDC7       | -0.231 | -0.2   | -0.22  | -0.412 | -1.261 | 4.07E-44 |
| FBXO32     | 1.149  | 0.772  | 1.066  | 1.284  | 2.27   | 4.21E-44 |
| EIF4B      | 0.253  | 0.185  | 0.248  | 0.516  | 0.74   | 4.29E-44 |
| WTIP       | 0.586  | -0.004 | -0.264 | -0.518 | -0.281 | 4.40E-44 |
| FRMD5      | -0.344 | 0.029  | 0.249  | 0.405  | 1.079  | 5.45E-44 |
| RNPEPL1    | 0.165  | -0.062 | -0.005 | 0.171  | 0.77   | 5.68E-44 |
| STX6       | 0.333  | 0.405  | 0.471  | 0.641  | 1.15   | 6.92E-44 |
| ACSS1      | -0.199 | 0.474  | 1.176  | 0.905  | 1.943  | 7.24E-44 |
| DUSP4      | 0.297  | 0.264  | 0.425  | 0.453  | 1.051  | 7.56E-44 |
| ABC7-42404 | 0.603  | -0.071 | -0.739 | -0.629 | -2.629 | 7.92E-44 |
| BMX        | -0.058 | -0.167 | 0.032  | 0.407  | 0.937  | 7.95E-44 |
| EPHA4      | 0.198  | 0.74   | 0.852  | 0.657  | 1.331  | 8.88E-44 |
| NRGN       | 0.013  | -0.011 | -0.019 | 0.192  | 1.132  | 1.03E-43 |
| MARCH2     | -0.152 | -0.069 | 0.082  | 0.115  | 0.767  | 1.26E-43 |
| E2F7       | 0.809  | 0.559  | 0.455  | 0.028  | 0.696  | 1.42E-43 |
| CYP51A1    | 0.347  | -0.243 | -0.67  | -0.547 | -0.189 | 1.55E-43 |
| CDYL2      | 0.722  | -0.021 | 0.098  | 0.235  | 0.786  | 1.91E-43 |
| CXCL5      | 0.026  | 0.853  | 0.856  | 0.919  | 2.548  | 2.32E-43 |
| SYTL4      | -0.043 | 0.001  | -0.359 | -0.617 | -0.834 | 2.32E-43 |
| SPRY1      | -0.167 | 0.079  | -0.368 | -0.897 | -1.087 | 2.32E-43 |
| TPP1       | 0.203  | 0.17   | 0.194  | 0.461  | 1.02   | 2.47E-43 |
| PCBD1      | -0.11  | -0.115 | 0.079  | 0.277  | 0.772  | 3.24E-43 |
| RMI1       | -0.062 | -0.008 | -0.265 | -0.431 | -0.957 | 3.40E-43 |
| ZMAT3      | 0.888  | 1.07   | 0.796  | 0.848  | 1.082  | 3.46E-43 |
| SMC5       | 0.259  | 0.419  | 0.172  | -0.114 | -0.293 | 3.50E-43 |
| SOX12      | -0.165 | -0.431 | 0.108  | 0.41   | 1.062  | 3.84E-43 |

|             |        |        |        |        |        |          |
|-------------|--------|--------|--------|--------|--------|----------|
| ADIPOR2     | 0.128  | -0.141 | -0.478 | -0.638 | -1.048 | 4.40E-43 |
| MN1         | 1.756  | 0.574  | 0.789  | 0.872  | 1.431  | 4.62E-43 |
| SH3RF2      | -0.073 | -0.595 | -0.431 | 0.17   | 1.509  | 4.63E-43 |
| NR4A1       | 1.999  | 1.172  | 0.879  | 0.446  | 0.388  | 5.41E-43 |
| SNN         | 0.348  | 0.008  | -0.373 | -0.346 | 0.774  | 6.18E-43 |
| RASA3       | 0.365  | -0.243 | 0.124  | 0.542  | 0.752  | 6.54E-43 |
| C16orf74    | -0.152 | -0.299 | 0.043  | 0.199  | 0.887  | 6.60E-43 |
| JAG1        | 0.705  | 0.194  | -0.098 | -0.256 | 0.865  | 6.68E-43 |
| SIAE        | 0.164  | 0.015  | 0.072  | 0.327  | 0.915  | 6.74E-43 |
| IRS2        | -0.258 | 0.288  | -0.266 | -0.453 | -1.526 | 8.55E-43 |
| ADTRP       | 0.117  | -0.138 | 0.346  | 0.313  | 1.375  | 8.83E-43 |
| KIF23       | -0.755 | -0.908 | -0.539 | -0.208 | -0.649 | 9.95E-43 |
| OSBP2       | 0.258  | 0.093  | 0.285  | 0.644  | 1.411  | 1.04E-42 |
| SLC30A1     | 0.992  | 0.397  | 0.383  | 0.328  | 0.642  | 1.05E-42 |
| KIT         | -0.925 | 0.31   | 1.18   | 1.24   | 2.72   | 1.08E-42 |
| TNFRSF1B    | 0.105  | -0.373 | -0.357 | -0.217 | -1.109 | 1.11E-42 |
| NES         | -0.221 | -0.074 | 0.098  | -0.086 | 0.725  | 1.15E-42 |
| SEMA6D      | -0.516 | 0.779  | 0.337  | -0.125 | -0.603 | 1.16E-42 |
| TNS1        | 0.397  | -0.193 | -0.014 | 0.192  | 0.772  | 1.28E-42 |
| PARP12      | 0.03   | -0.067 | 0.245  | 0.405  | 1.034  | 1.64E-42 |
| TMEM25      | -0.387 | -0.101 | 0.122  | 0.326  | 0.827  | 1.66E-42 |
| RUNX1       | -0.042 | -0.137 | 0.082  | 0.174  | 0.686  | 1.87E-42 |
| CD163L1     | 0.077  | -0.104 | 0.134  | 0.241  | 0.96   | 1.89E-42 |
| RP1-140K8.5 | -0.375 | -0.179 | 0.379  | 0.305  | 1.009  | 1.94E-42 |
| DUSP23      | -0.259 | -0.363 | -0.35  | -0.341 | -1.218 | 2.03E-42 |
| SOX13       | 0.6    | -0.428 | -0.058 | -0.124 | -0.452 | 2.26E-42 |
| COL4A5      | 0.176  | 0.167  | 0.305  | 0.37   | 0.909  | 2.32E-42 |
| CD276       | 0.242  | 0.019  | -0.028 | 0.322  | 1.025  | 3.11E-42 |
| CHAF1B      | 0.553  | 0.225  | -0.276 | -0.371 | -0.819 | 3.39E-42 |
| RAB29       | -0.185 | -0.005 | 0.241  | 0.413  | 0.758  | 3.47E-42 |
| SSR1        | 0.19   | 0.007  | -0.114 | -0.012 | -0.525 | 3.76E-42 |
| ZGRF1       | -0.009 | 0.182  | -0.308 | -0.76  | -0.948 | 3.82E-42 |
| SYNM        | 0.713  | 0.756  | 0.141  | -0.364 | 0.069  | 4.79E-42 |
| NR3C1       | 1.286  | 0.026  | -0.094 | 0.355  | 0.108  | 4.86E-42 |
| SLFN5       | 0.438  | 0.627  | 0.46   | 0.558  | 1.117  | 5.13E-42 |
| DAPK3       | 0.345  | 0.303  | 0.263  | 0.483  | 1.007  | 5.21E-42 |
| SCD         | 0.525  | -0.157 | -0.66  | -0.657 | 0.098  | 5.80E-42 |
| ADAMTSL1    | -0.185 | -0.262 | -0.365 | -0.339 | 0.733  | 6.00E-42 |

|            |        |        |        |        |        |          |
|------------|--------|--------|--------|--------|--------|----------|
| SEMA6B     | -0.319 | -0.226 | 0.096  | 0.541  | 1.058  | 6.40E-42 |
| ACKR1      | 0.06   | 0.113  | 0.025  | -0.488 | -1.457 | 7.79E-42 |
| TMEM30A    | 0.224  | 0.28   | 0.16   | 0.418  | 0.708  | 7.88E-42 |
| MXRA7      | 0.083  | 0.029  | 0.057  | 0.202  | 0.656  | 8.58E-42 |
| TOX        | -0.502 | -0.015 | -0.426 | -0.202 | -1.606 | 8.79E-42 |
| PEG10      | 0.205  | -0.143 | -0.183 | 0.132  | 1.196  | 9.50E-42 |
| ISCU       | 0.212  | 0.546  | 0.689  | 0.611  | 0.833  | 9.62E-42 |
| PKMYT1     | 0.144  | 0.15   | -0.198 | -0.356 | -1.116 | 9.69E-42 |
| DONSON     | 0.179  | 0.171  | -0.054 | -0.11  | -0.676 | 1.37E-41 |
| SMURF1     | 0.622  | 0.239  | 0.117  | 0.062  | 0.664  | 1.40E-41 |
| MAPK14     | 0.147  | -0.232 | -0.432 | -0.257 | -0.446 | 1.57E-41 |
| ADA        | 0.308  | 0.087  | 0.096  | 0.224  | 1      | 1.58E-41 |
| RP11-597D1 | -0.336 | 0.528  | 0.81   | 0.709  | 1.223  | 1.69E-41 |
| GFOD1      | 0.346  | -0.311 | -0.484 | -0.665 | -0.604 | 1.94E-41 |
| DUSP1      | -0.314 | 0.536  | 0.553  | 0.4    | 0.576  | 2.09E-41 |
| PDPN       | 0.125  | -0.125 | -0.175 | -0.062 | 1.16   | 2.31E-41 |
| CYB561     | 0.256  | -0.259 | -0.229 | -0.364 | -0.512 | 2.37E-41 |
| GALNT10    | 0.258  | 0.021  | 0.002  | 0.29   | 0.801  | 2.44E-41 |
| SLC12A7    | -0.209 | 0.38   | 0.168  | -0.169 | 0.497  | 2.49E-41 |
| ERGIC3     | 0.042  | 0.011  | 0.034  | 0.237  | 0.442  | 2.53E-41 |
| APAF1      | 0.385  | 0.292  | 0.25   | 0.253  | 0.704  | 2.90E-41 |
| DYRK1B     | -0.03  | 0.048  | 0.204  | 0.398  | 1.005  | 3.10E-41 |
| AIF1L      | -0.207 | -0.154 | 0.174  | 0.365  | 0.839  | 3.42E-41 |
| HRH1       | 0.512  | 0.166  | 0.451  | 0.597  | 0.973  | 3.78E-41 |
| PLEKHA6    | -0.018 | 0.344  | 1      | 0.988  | 1.227  | 5.01E-41 |
| IFFO2      | 0.486  | -0.062 | 0.265  | 0.562  | 0.904  | 5.98E-41 |
| LXN        | -0.184 | -0.173 | -0.068 | -0.055 | 1.103  | 6.32E-41 |
| ADM        | -0.582 | -0.092 | -0.895 | -1.161 | -1.681 | 6.89E-41 |
| ARHGAP5    | 0.4    | 0.206  | 0.092  | 0.208  | 0.921  | 7.10E-41 |
| HSPA4L     | 0.554  | 1.116  | 1.236  | 1.591  | 1.511  | 7.21E-41 |
| ZNFX1      | 0.795  | 0.448  | 0.508  | 0.479  | 0.982  | 7.21E-41 |
| HRCT1      | 0.128  | 0.052  | -0.188 | 0.013  | -1.53  | 7.80E-41 |
| MTMR4      | -0.756 | -0.178 | -0.197 | -0.364 | -0.709 | 8.97E-41 |
| REV3L      | 0.489  | 0.807  | 0.705  | 0.693  | 0.997  | 8.99E-41 |
| DYRK3      | 0.735  | 0.179  | 0.465  | 0.803  | 1.196  | 1.01E-40 |
| KIAA1549   | -0.001 | 0.223  | 0.191  | 0.23   | 0.92   | 1.02E-40 |
| MGAT4B     | 0.14   | 0.123  | 0.019  | 0.127  | 0.711  | 1.24E-40 |
| KIAA1715   | -0.035 | 0.188  | -0.076 | -0.29  | -1.045 | 1.32E-40 |

|            |        |        |        |        |        |          |
|------------|--------|--------|--------|--------|--------|----------|
| KNSTRN     | -0.835 | -0.878 | -0.691 | -0.312 | -0.398 | 1.44E-40 |
| HIF3A      | -0.636 | -0.41  | 0.117  | -0.272 | -1.101 | 1.44E-40 |
| PIR        | 0.167  | 0.016  | 0.008  | 0.283  | 0.742  | 1.84E-40 |
| PSMC3IP    | 0.288  | 0.108  | -0.188 | -0.582 | -0.825 | 1.88E-40 |
| TMCO6      | -0.504 | -0.111 | -0.082 | -0.608 | -1.05  | 1.88E-40 |
| ACVRL1     | -0.056 | -0.077 | 0.133  | 0.284  | 0.512  | 2.07E-40 |
| SRGAP1     | 0.406  | 0.379  | 0.706  | 0.667  | 1.094  | 2.48E-40 |
| SNX33      | -0.166 | 0.062  | 0.065  | 0.321  | 0.783  | 2.54E-40 |
| IQCJ-SCHIP | 1.065  | 0.489  | 0.649  | 0.771  | 1.589  | 2.87E-40 |
| RASGRF2    | 0.033  | -0.176 | -0.357 | 0.04   | 0.742  | 2.94E-40 |
| PARP10     | -0.464 | 0.406  | 0.833  | 0.528  | 1.018  | 3.49E-40 |
| BIN1       | 0.177  | -0.158 | -0.006 | 0.347  | 0.774  | 3.52E-40 |
| PEBP1      | 0.162  | -0.005 | -0.007 | 0.328  | 0.781  | 4.30E-40 |
| SPIN4      | 0.068  | -0.393 | -0.456 | -0.249 | -1.399 | 4.33E-40 |
| FDFT1      | 0.44   | -0.235 | -0.618 | -0.497 | 0.134  | 4.43E-40 |
| C9orf142   | -0.25  | -0.138 | -0.189 | -0.597 | -1.128 | 4.58E-40 |
| CDC14A     | -0.01  | 0.315  | -0.54  | -0.833 | -0.401 | 5.58E-40 |
| OTUD3      | 0.22   | 0.039  | 0.024  | -0.66  | -0.758 | 5.61E-40 |
| CST3       | 0.103  | -0.058 | -0.056 | 0.255  | 0.728  | 5.70E-40 |
| ACSL3      | 0.189  | -0.192 | -0.257 | 0.047  | 0.664  | 6.02E-40 |
| KDM5B      | 0.148  | 0.171  | 0.151  | 0.348  | 0.955  | 6.13E-40 |
| MAP3K2     | 0.45   | 0.347  | 0.109  | -0.216 | -0.392 | 6.26E-40 |
| RGS3       | -0.308 | -0.04  | -0.065 | -0.027 | 0.762  | 6.86E-40 |
| ITFG1      | 0.194  | 0.13   | -0.007 | 0.4    | 0.698  | 6.95E-40 |
| TRIM8      | 0.338  | 0.084  | 0.236  | 0.55   | 0.968  | 7.67E-40 |
| TMEM65     | 0.243  | -0.016 | 0.047  | 0.318  | 0.725  | 7.74E-40 |
| FLRT2      | -0.037 | 0.087  | 0.064  | 0.028  | 1.017  | 8.75E-40 |
| SPTBN2     | 0.289  | -0.066 | -0.067 | -0.212 | 0.928  | 8.80E-40 |
| EGFL7      | -0.533 | -0.363 | -0.366 | -0.746 | -1.174 | 9.46E-40 |
| LRP10      | 0.15   | 0.202  | 0.222  | 0.674  | 1.054  | 1.08E-39 |
| WDFY4      | -0.084 | -0.241 | 0.059  | 0.612  | 0.886  | 1.10E-39 |
| RP11-398C1 | 0.207  | 0.049  | -0.263 | -0.473 | -0.759 | 1.45E-39 |
| ARHGAP11A  | -0.789 | -0.752 | -0.652 | -0.558 | -1.044 | 1.48E-39 |
| SCRN1      | 0.161  | -0.02  | 0.113  | 0.518  | 0.956  | 1.55E-39 |
| RP11-680F8 | -0.302 | 0.376  | 0.809  | 0.599  | 1.927  | 1.62E-39 |
| NEK6       | 0.269  | -0.352 | 0.101  | 0.342  | 0.359  | 1.63E-39 |
| SH3BGRL2   | -0.231 | -0.028 | -0.015 | 0.13   | -0.561 | 1.67E-39 |
| KDM4B      | -0.12  | 0.375  | 0.419  | 0.55   | 0.922  | 1.86E-39 |



|            |        |        |        |        |        |          |
|------------|--------|--------|--------|--------|--------|----------|
| HDAC1      | 0.241  | -0.041 | -0.027 | 0.089  | 0.612  | 1.94E-39 |
| EXOC3L1    | 0.318  | -0.166 | -0.396 | -0.485 | -1.692 | 1.96E-39 |
| NIPSNAP1   | 0.267  | 0.02   | -0.09  | 0.307  | 1.008  | 2.07E-39 |
| GAB1       | -0.063 | 0.358  | -0.22  | -0.634 | 0.647  | 2.16E-39 |
| G2E3       | -0.935 | -0.835 | -0.799 | -0.53  | -0.297 | 2.22E-39 |
| RTEL1      | -0.336 | 0.08   | 0.051  | -0.445 | -1.129 | 2.29E-39 |
| ZSWIM6     | 0.335  | 0.157  | 0.778  | 0.549  | 1.343  | 2.76E-39 |
| CRY1       | 0.172  | 0.01   | -0.333 | -0.647 | -0.284 | 2.78E-39 |
| SSH2       | -0.481 | -0.093 | -0.131 | -0.132 | 0.493  | 2.83E-39 |
| ERF        | 0.514  | -0.383 | -0.435 | -0.348 | -0.338 | 2.87E-39 |
| EIF1AD     | 0.235  | 0.105  | -0.05  | -0.162 | -0.586 | 3.02E-39 |
| CTC1       | -0.598 | 0.252  | 0.449  | 0.145  | 0.214  | 3.73E-39 |
| PTCHD4     | -0.282 | 1.055  | 0.919  | 1.001  | 1.729  | 3.89E-39 |
| ASB9       | 0.052  | -0.173 | -0.111 | 0.176  | 1.475  | 3.99E-39 |
| APOD       | 0.28   | 0.737  | 0.982  | 1.319  | 1.961  | 4.04E-39 |
| DSE        | 0.179  | 0.237  | 0.129  | 0.102  | 1.276  | 4.04E-39 |
| RECQL4     | -0.203 | 0.018  | -0.203 | -0.836 | -1.196 | 4.05E-39 |
| MEGF6      | -0.614 | 0.001  | 0.473  | 0.203  | 1.079  | 4.19E-39 |
| GRB14      | -0.087 | -0.325 | -0.433 | -0.839 | -1.284 | 4.37E-39 |
| IER3       | 0.046  | 0.276  | 0.236  | 0.233  | 0.7    | 4.56E-39 |
| YPEL1      | -0.52  | 0.145  | 0.273  | 0.618  | 1.859  | 4.58E-39 |
| STK17B     | -0.041 | -0.438 | -0.676 | -0.506 | -1.057 | 4.67E-39 |
| LAPTM5     | 0.259  | 0.103  | 0.092  | 0.5    | 0.972  | 4.68E-39 |
| DPF3       | -0.523 | 0.143  | 0.774  | 0.584  | 1.058  | 4.78E-39 |
| FAM69B     | 0.003  | -0.429 | -0.615 | -0.7   | -0.418 | 5.13E-39 |
| ID1        | 0.955  | -0.361 | 0.003  | 0.206  | -1.865 | 5.48E-39 |
| BCL6B      | -0.728 | 0.208  | 0.147  | -0.443 | 0.602  | 5.94E-39 |
| SUGCT      | 0.311  | 0.352  | 0.736  | 1.19   | 2.108  | 6.30E-39 |
| ARMC9      | -0.09  | -0.25  | 0.006  | 0.326  | 1.212  | 6.46E-39 |
| F2RL3      | 0.74   | 0.467  | 1.161  | 1.294  | 2.249  | 6.57E-39 |
| IL7R       | -0.084 | 0.726  | 0.134  | -0.198 | 0.027  | 6.91E-39 |
| SGCG       | 0.169  | 0.13   | -0.553 | -0.355 | -2.599 | 7.57E-39 |
| CCRL2      | -0.507 | -0.069 | 0.603  | 0.868  | 0.551  | 7.77E-39 |
| AP000695.4 | 0.243  | -0.076 | 0.555  | 0.737  | 1.467  | 8.28E-39 |
| RP11-359E1 | 0.215  | 0.942  | 0.986  | 1.261  | 2.138  | 8.89E-39 |
| RP11-304F1 | -0.24  | -0.11  | -0.111 | -0.89  | -1.9   | 9.27E-39 |
| NUP85      | 0.083  | 0.062  | -0.087 | -0.242 | -0.58  | 9.70E-39 |
| ZMYND19    | 0.002  | -0.053 | -0.509 | -0.783 | -0.594 | 1.04E-38 |

|            |        |        |        |        |        |          |
|------------|--------|--------|--------|--------|--------|----------|
| CTC-316M1E | 0.286  | 0.013  | 0.137  | 0.646  | 1.432  | 1.05E-38 |
| PTTG1IP    | 0.048  | -0.065 | -0.123 | 0.162  | 0.498  | 1.06E-38 |
| ERMP1      | 0.132  | 0.009  | 0.06   | 0.386  | 1      | 1.07E-38 |
| TNKS1BP1   | 0.019  | 0.104  | 0.21   | 0.248  | 0.773  | 1.11E-38 |
| NCAPG      | -0.272 | -0.472 | -0.527 | -0.167 | -0.776 | 1.15E-38 |
| PCYOX1     | 0.174  | 0.128  | 0.16   | 0.597  | 1.112  | 1.23E-38 |
| MMP19      | -0.467 | 0.251  | 0.474  | 0.276  | 0.904  | 1.46E-38 |
| SELE       | 1.765  | 1.732  | 0.2    | -0.316 | 2.629  | 1.52E-38 |
| RND1       | 1.821  | 1.587  | -0.099 | -0.025 | 2.075  | 1.67E-38 |
| PCDH10     | 0.083  | -0.004 | -0.427 | -0.253 | -1.174 | 1.76E-38 |
| ETV4       | -0.376 | -0.225 | 0.041  | 0.236  | 0.642  | 1.81E-38 |
| RP11-168P8 | 0.226  | -0.652 | -0.891 | -0.769 | -2.313 | 1.81E-38 |
| ARNTL2     | 0.066  | 0.138  | 0.236  | 0.305  | 0.669  | 1.92E-38 |
| DNMBP      | -0.288 | -0.032 | 0.124  | 0.139  | 0.429  | 1.96E-38 |
| IFIH1      | -0.001 | 1.033  | 0.909  | 1.054  | 2.07   | 2.14E-38 |
| SC5D       | 0.491  | -0.064 | -0.516 | -0.461 | -0.386 | 2.15E-38 |
| SFRP1      | 0.265  | 0.104  | 0.026  | 0.42   | 1.077  | 2.40E-38 |
| TRAF5      | -0.223 | -0.132 | 0.339  | -0.058 | 1.319  | 2.50E-38 |
| LTK        | 0.004  | -0.015 | -0.238 | -0.722 | -2.437 | 2.50E-38 |
| VEGFC      | 0.388  | 0.288  | -0.477 | -0.23  | -0.057 | 2.51E-38 |
| PDE2A      | 0.297  | 0.034  | 0.369  | 0.489  | 1.312  | 2.56E-38 |
| APOL2      | -0.065 | 0.348  | 0.702  | 0.382  | 0.711  | 2.56E-38 |
| MAP4       | 0.078  | 0.041  | 0.075  | 0.097  | 0.588  | 2.71E-38 |
| EIF1       | 0.468  | 0.153  | 0.035  | 0.167  | -0.107 | 3.29E-38 |
| AUP1       | -0.082 | 0.029  | -0.015 | -0.257 | -0.571 | 3.90E-38 |
| KLF15      | -1.112 | -0.349 | -0.996 | -1.356 | -2.67  | 3.99E-38 |
| TSPAN5     | 0.109  | -0.253 | -0.127 | 0.181  | 0.675  | 4.29E-38 |
| MARCH4     | 0.118  | -0.093 | 0.291  | 0.831  | 0.963  | 4.41E-38 |
| AC073130.1 | -0.638 | 0.144  | 0.545  | 0.668  | -0.086 | 4.43E-38 |
| FUCA2      | 0.147  | 0.15   | 0.127  | 0.413  | 0.785  | 4.57E-38 |
| LMBRD2     | -0.106 | 0.152  | -0.095 | -0.209 | -0.928 | 5.09E-38 |
| UCK2       | 0.323  | -0.089 | 0      | 0.284  | 0.725  | 5.14E-38 |
| HBP1       | 0.315  | 0.236  | 0.424  | 0.571  | 0.863  | 5.41E-38 |
| CDK6       | 0.442  | 0.3    | 0.078  | -0.058 | 0.605  | 5.86E-38 |
| CLIP2      | -0.315 | 0.078  | 0.381  | 0.293  | 0.801  | 7.21E-38 |
| TMEM233    | 0.187  | -0.365 | 0.084  | 0.355  | 1.226  | 8.38E-38 |
| EPHB4      | 0.563  | -0.33  | -0.539 | -0.193 | -0.342 | 9.01E-38 |
| CMTM8      | 0.307  | -0.335 | -1.062 | -1.088 | -1.162 | 9.19E-38 |

|            |        |        |        |        |        |          |
|------------|--------|--------|--------|--------|--------|----------|
| CLSPN      | 0.572  | 0.267  | -0.054 | -0.213 | -0.579 | 9.35E-38 |
| KIF22      | -0.431 | -0.428 | -0.438 | -0.329 | -1     | 9.45E-38 |
| STC2       | -0.192 | -0.235 | 0.001  | 0.203  | -0.725 | 9.67E-38 |
| ZBTB2      | 0.7    | -0.392 | -0.57  | -0.386 | 0.169  | 9.88E-38 |
| PLXNB1     | 0.346  | 0.593  | 0.606  | 0.185  | 1.155  | 1.01E-37 |
| RND3       | 0.433  | -0.094 | -0.233 | -0.146 | -0.323 | 1.03E-37 |
| CDCA3      | -1.161 | -1.101 | -0.764 | -0.838 | -1.505 | 1.07E-37 |
| EIF3H      | 0.14   | 0.085  | 0.089  | 0.3    | 0.516  | 1.12E-37 |
| SHE        | 0.419  | -0.261 | -0.332 | -0.193 | -0.765 | 1.50E-37 |
| CCDC130    | -0.434 | 0.158  | -0.004 | -0.771 | -0.857 | 1.57E-37 |
| ZNF185     | 0.345  | 0.061  | 0.211  | 0.699  | 1.148  | 1.67E-37 |
| SRRT       | 0.108  | -0.069 | -0.164 | -0.385 | -0.6   | 1.76E-37 |
| RNF149     | -0.066 | -0.011 | 0.205  | 0.258  | 0.756  | 2.22E-37 |
| GTSE1      | -0.835 | -0.892 | -0.61  | -0.281 | -0.583 | 2.61E-37 |
| GIN51      | 0.054  | 0.009  | -0.194 | -0.277 | -0.966 | 2.95E-37 |
| HAUS5      | -0.329 | 0.051  | -0.032 | -0.552 | -1.133 | 2.99E-37 |
| MKI67      | -0.9   | -0.761 | -0.542 | -0.411 | -1.14  | 3.01E-37 |
| ASAP2      | 0.431  | 0.143  | 0.329  | 0.539  | 0.715  | 3.35E-37 |
| PPP1R15B   | 0.187  | 0.135  | -0.133 | -0.237 | -0.6   | 3.84E-37 |
| RAB3D      | -0.242 | -0.138 | 0.233  | 0.592  | 0.754  | 4.26E-37 |
| RAB30      | 0.857  | 0.125  | -0.009 | 0.216  | 0.069  | 4.45E-37 |
| TPST2      | 0.003  | -0.076 | -0.066 | -0.069 | 0.733  | 4.49E-37 |
| RP11-137N2 | 0.216  | -0.224 | -0.365 | -0.554 | -0.677 | 4.57E-37 |
| PRIM1      | 0.136  | 0.113  | -0.158 | -0.173 | -1.21  | 4.63E-37 |
| BCS1L      | -0.31  | -0.075 | -0.02  | -0.453 | -0.997 | 5.46E-37 |
| ZFPM1      | 1.234  | 0.696  | 0.768  | 0.419  | 0.972  | 5.69E-37 |
| MAVS       | -0.292 | 0.052  | 0.247  | 0.185  | 0.356  | 6.26E-37 |
| MPZL2      | -0.235 | -0.164 | -0.157 | 0.085  | 0.611  | 6.49E-37 |
| KIAA1549L  | 0.081  | -0.4   | -0.101 | 0.29   | 0.778  | 8.10E-37 |
| SAPCD2     | -0.751 | -1.356 | -0.97  | -0.404 | -0.287 | 8.93E-37 |
| KBTBD2     | 0.596  | 0.042  | -0.022 | 0.035  | -0.114 | 8.96E-37 |
| CENPF      | -0.779 | -1.039 | -0.728 | -0.337 | -0.306 | 9.15E-37 |
| RHOB       | 0.867  | 0.173  | -0.235 | -0.044 | 0.259  | 9.35E-37 |
| ARHGAP33   | -0.794 | -0.391 | -0.362 | -1.205 | -1.926 | 1.20E-36 |
| TONSL      | -0.021 | -0.133 | -0.444 | -0.929 | -1.104 | 1.27E-36 |
| AKNA       | -0.232 | 0.041  | 0.203  | 0.23   | 0.797  | 1.77E-36 |
| RAD9A      | -0.424 | -0.21  | -0.281 | -1.161 | -1.309 | 1.78E-36 |
| ICOSLG     | 0.307  | 1.197  | 1.432  | 1.036  | 1.96   | 1.79E-36 |

|            |        |        |        |        |        |          |
|------------|--------|--------|--------|--------|--------|----------|
| FAM208A    | -0.282 | -0.03  | 0.244  | 0.422  | 0.259  | 1.79E-36 |
| PRR11      | -0.274 | -0.665 | -0.62  | -0.139 | 0.361  | 2.02E-36 |
| RP11-322E1 | -0.784 | -0.217 | 0.617  | 0.539  | 1.779  | 2.18E-36 |
| BTN3A3     | -0.099 | -0.045 | 0.426  | 0.438  | 1.147  | 2.18E-36 |
| TSEN54     | -0.142 | -0.069 | -0.299 | -0.563 | -1.035 | 2.21E-36 |
| BACH1      | 0.23   | 0.279  | 0.275  | 0.53   | 0.998  | 2.66E-36 |
| EMP1       | 0.387  | -0.205 | -0.33  | -0.078 | -0.645 | 2.75E-36 |
| SPRED1     | 0.574  | -0.081 | -0.025 | 0.163  | 0.714  | 2.90E-36 |
| S1PR3      | 0.04   | 0.495  | 0.506  | 0.543  | 0.9    | 2.91E-36 |
| NOP58      | 0.327  | 0.044  | -0.195 | -0.101 | -0.4   | 3.10E-36 |
| DHRS9      | 0.097  | -0.059 | -0.31  | -0.249 | -1.136 | 3.21E-36 |
| CXCL2      | 0.752  | 0.74   | -0.022 | -1.092 | 0.756  | 3.55E-36 |
| ERN1       | -0.352 | 0.484  | 0.365  | -0.057 | 0.072  | 3.69E-36 |
| PPFIBP1    | 0.028  | 0.369  | 0.403  | 0.406  | 0.594  | 4.54E-36 |
| PMAIP1     | 0.575  | 0.715  | 0.526  | 0.14   | 1.243  | 4.79E-36 |
| CLDN1      | 0.386  | 1.205  | 1.394  | 1.628  | 2.315  | 5.83E-36 |
| WDR90      | -0.436 | -0.002 | -0.128 | -1.049 | -1.35  | 6.54E-36 |
| MET        | 0.285  | -0.06  | -0.208 | 0.175  | 0.799  | 6.78E-36 |
| TMEM123    | 0.311  | 0.1    | -0.176 | 0.055  | -0.844 | 7.48E-36 |
| SRSF10     | 0.033  | -0.107 | -0.098 | -0.319 | -0.497 | 7.59E-36 |
| JMJD1C     | -0.291 | 0.081  | 0.2    | 0.133  | 0.752  | 7.63E-36 |
| FMNL3      | 0.104  | 0.113  | 0.347  | 0.042  | 0.842  | 7.79E-36 |
| FLNB       | 0.041  | -0.069 | 0.132  | 0.253  | 0.924  | 7.81E-36 |
| CSNK1G1    | 0.013  | 0.306  | 0.23   | 0.186  | 0.66   | 7.85E-36 |
| BRCA2      | 0.082  | 0.052  | -0.186 | -0.309 | -0.823 | 9.25E-36 |
| EHD1       | 0.487  | 0.232  | 0.477  | 0.945  | 1.364  | 9.51E-36 |
| RBM26      | -0.365 | 0.079  | 0.073  | -0.161 | -0.497 | 9.84E-36 |
| ASTN2      | 0.496  | 1.05   | 1.878  | 1.812  | 2.098  | 1.11E-35 |
| KCTD15     | 0.528  | -0.124 | -0.16  | -0.266 | -0.223 | 1.12E-35 |
| ATAD2      | 0.436  | 0.068  | -0.403 | -0.426 | -0.712 | 1.19E-35 |
| AHR        | 0.896  | 0.441  | -0.216 | -0.138 | -0.401 | 1.23E-35 |
| PER1       | -0.223 | -0.209 | -0.479 | -0.751 | -1.218 | 1.32E-35 |
| GATA6      | 0.883  | -0.232 | -0.178 | 0.214  | -0.203 | 1.33E-35 |
| KRI1       | -0.507 | -0.052 | -0.031 | -0.279 | -0.976 | 1.36E-35 |
| DDX39A     | -0.067 | -0.172 | -0.265 | -0.243 | -0.716 | 1.61E-35 |
| TMPO       | -0.03  | -0.304 | -0.429 | -0.068 | -0.865 | 1.73E-35 |
| WDR48      | 0.19   | 0.491  | 0.451  | 0.542  | 0.89   | 1.76E-35 |
| COTL1      | 0.19   | 0.072  | 0.033  | 0.349  | 0.795  | 1.79E-35 |

|             |        |        |        |        |        |          |
|-------------|--------|--------|--------|--------|--------|----------|
| KIF3C       | 0.196  | -0.203 | -0.152 | 0.222  | 0.885  | 1.87E-35 |
| RP11-150O1  | 0.047  | -0.28  | 0.353  | 0.419  | 1.943  | 1.96E-35 |
| PTPRF       | -0.01  | -0.035 | 0.161  | 0.444  | 1.002  | 1.97E-35 |
| CDCA2       | -1.145 | -1.069 | -0.889 | -0.214 | -0.512 | 1.99E-35 |
| DGKD        | -0.156 | 0.281  | -0.06  | -0.624 | -0.365 | 2.13E-35 |
| TNFSF18     | -0.978 | 0.252  | 0.425  | 0.086  | 1.224  | 2.15E-35 |
| CSRP1       | 0.261  | -0.012 | 0.031  | 0.362  | 0.884  | 2.16E-35 |
| NR2C2AP     | 0.14   | -0.088 | -0.495 | -0.731 | -0.974 | 2.29E-35 |
| CTHRC1      | 0.171  | -0.192 | -0.497 | -0.653 | 0.568  | 2.34E-35 |
| RP11-874J11 | -0.222 | 0.251  | 0.399  | 0.418  | 1.91   | 2.48E-35 |
| FIGNL1      | -0.127 | 0.023  | -0.113 | -0.363 | -0.64  | 2.59E-35 |
| RGCC        | 0.21   | -0.079 | 0.149  | -0.071 | 1.078  | 2.83E-35 |
| FANCI       | 0.084  | 0.21   | 0.135  | 0.229  | -0.602 | 3.31E-35 |
| DENND5B     | 0.469  | -0.34  | -0.5   | -0.204 | 0.556  | 3.36E-35 |
| PLCG1       | -0.131 | -0.174 | -0.057 | -0.218 | 0.389  | 3.79E-35 |
| MYCT1       | 0.449  | 0.291  | 0.276  | 0.558  | 0.704  | 3.96E-35 |
| SERPINB1    | 0.294  | 0.082  | 0.217  | 0.634  | 0.935  | 4.05E-35 |
| BTBD3       | 0.236  | 0.021  | -0.344 | -0.352 | -0.804 | 4.13E-35 |
| NOG         | 1.557  | -0.278 | 0.083  | 0.402  | 2.14   | 4.34E-35 |
| FAS         | 0.871  | 1.51   | 1.348  | 0.91   | 1.263  | 4.60E-35 |
| ITGA3       | 0.182  | 0.099  | 0.272  | 0.64   | 1.027  | 4.69E-35 |
| STARD10     | -0.102 | 0.268  | 0.645  | 0.615  | 1.224  | 4.75E-35 |
| SOX18       | 0.578  | -0.377 | -0.394 | -0.286 | 0.904  | 4.75E-35 |
| CHSY3       | 0.528  | -0.019 | -0.811 | -0.99  | -0.906 | 4.91E-35 |
| RNF145      | 0.21   | 0.032  | -0.428 | -0.48  | -0.24  | 4.97E-35 |
| FBXO38      | 0.112  | 0.212  | 0.329  | 0.458  | 0.657  | 5.42E-35 |
| TCF7L2      | 1.162  | 0.07   | 0.158  | 0.365  | 0.462  | 5.76E-35 |
| JARID2      | 0.141  | -0.257 | 0.198  | 0.427  | 0.84   | 6.49E-35 |
| AC002055.4  | -0.087 | 0.301  | 0.542  | 0.653  | 0.676  | 6.49E-35 |
| ARHGAP21    | 1.061  | 0.392  | 0.242  | 0.292  | 0.537  | 6.95E-35 |
| C8orf4      | 1.822  | 0.212  | -0.262 | -0.414 | 0.8    | 8.18E-35 |
| CREBL2      | 0.128  | 0.193  | 0.363  | 0.63   | 0.681  | 9.16E-35 |
| PHTF2       | -0.121 | -0.064 | -0.322 | -0.5   | -0.727 | 9.22E-35 |
| GAS6-AS1    | 0.679  | 1.774  | 2.215  | 1.635  | 1.896  | 1.18E-34 |
| C2CD2       | -0.364 | 0.098  | 0.473  | 0.18   | 0.891  | 1.21E-34 |
| NUF2        | -0.68  | -0.773 | -0.557 | -0.27  | -0.916 | 1.30E-34 |
| CCNA1       | -0.14  | -0.322 | -0.009 | 0.526  | 0.932  | 1.35E-34 |
| SORT1       | 0.141  | 0.02   | 0.063  | 0.39   | 1.3    | 1.51E-34 |

|          |        |        |        |        |        |          |
|----------|--------|--------|--------|--------|--------|----------|
| BORA     | -1.358 | -1.147 | -0.977 | -0.544 | -0.653 | 1.55E-34 |
| LRIG1    | -0.347 | 0.164  | 0.292  | 0.147  | 1.086  | 1.61E-34 |
| DCUN1D3  | 0.22   | 0.412  | 0.309  | 0.23   | 0.874  | 1.66E-34 |
| LDB2     | 0.135  | -0.506 | -0.703 | -0.576 | -1.139 | 1.74E-34 |
| ADAMTS4  | -0.305 | -0.036 | 0.202  | 0.095  | 0.764  | 1.78E-34 |
| BCL2L13  | 0.25   | 0.105  | 0.209  | 0.486  | 0.668  | 1.84E-34 |
| MAPK12   | -0.209 | -0.107 | -0.207 | -0.7   | -0.784 | 1.93E-34 |
| COL4A6   | 0.231  | 0.088  | 0.158  | 0.355  | 0.871  | 1.99E-34 |
| WASF3    | -0.626 | -0.376 | -0.343 | -0.424 | -0.715 | 2.01E-34 |
| TGFBRAP1 | -0.059 | 0.174  | 0.395  | 0.518  | 0.9    | 2.04E-34 |
| EFNA1    | -0.686 | 0.125  | 0.259  | 0.204  | 1.464  | 2.12E-34 |
| RAC2     | 0.224  | -0.23  | -0.044 | 0.452  | 0.962  | 2.19E-34 |
| GPR161   | 0.155  | 0.01   | -0.046 | 0.046  | 0.77   | 2.78E-34 |
| RGP1     | -0.375 | 0.011  | 0.38   | 0.276  | 0.18   | 2.80E-34 |
| SEMA3A   | 0.084  | 0.453  | 0.33   | 0.53   | 1.548  | 3.40E-34 |
| RHOC     | 0.063  | 0.032  | 0.057  | 0.293  | 0.647  | 3.63E-34 |
| TLE1     | 0.507  | -0.297 | -0.149 | 0.193  | 0.467  | 3.70E-34 |
| LIMS2    | 0.11   | -0.183 | -0.152 | -0.162 | -0.837 | 3.91E-34 |
| NUP58    | -0.017 | 0.041  | -0.314 | -0.314 | -0.514 | 3.99E-34 |
| LGALS1   | 0.074  | -0.11  | 0.007  | 0.171  | 0.491  | 4.34E-34 |
| PRKACB   | 0.315  | -0.048 | -0.38  | -0.202 | -0.292 | 4.34E-34 |
| ACSL5    | 0.102  | 0.007  | 0.153  | 0.39   | 0.939  | 4.38E-34 |
| DLGAP5   | -0.492 | -0.965 | -1.025 | -0.297 | -0.153 | 4.46E-34 |
| WWTR1    | 0.143  | -0.275 | -0.419 | -0.454 | -0.452 | 4.76E-34 |
| GPX3     | 0.041  | 0.074  | 0.243  | 0.648  | 0.833  | 5.07E-34 |
| GAMT     | -0.091 | 0.056  | 0.269  | 0.552  | 1.049  | 5.63E-34 |
| TCAIM    | -0.024 | 0.252  | 0.481  | 0.605  | 0.664  | 6.27E-34 |
| ZNF358   | -0.106 | 0.024  | 0.003  | 0.221  | 0.892  | 6.40E-34 |
| SCARF1   | -0.641 | -0.245 | 0.109  | -0.008 | 0.412  | 6.86E-34 |
| MCM6     | 0.583  | 0.067  | -0.575 | -0.527 | -0.765 | 6.87E-34 |
| GAS6-AS2 | 0.104  | 0.36   | 0.769  | 0.779  | 2.108  | 6.97E-34 |
| CALM1    | 0.028  | -0.051 | -0.008 | 0.163  | 0.506  | 7.02E-34 |
| BBS10    | -0.922 | -0.319 | -0.217 | -0.265 | -0.592 | 7.04E-34 |
| MYEF2    | -0.643 | -0.191 | 0.266  | 0.167  | 0.7    | 7.17E-34 |
| LIMCH1   | 0.126  | -0.23  | -0.917 | -1.293 | -1.819 | 7.77E-34 |
| FAT4     | 0.15   | -0.067 | -0.507 | -0.446 | -1.112 | 8.32E-34 |
| FAM89A   | 0.016  | -0.059 | 0.168  | 0.034  | 1.396  | 9.62E-34 |
| TAPBP    | 0.108  | 0.284  | 0.223  | 0.401  | 0.868  | 1.00E-33 |

|           |        |        |        |        |        |          |
|-----------|--------|--------|--------|--------|--------|----------|
| ITPR3     | -0.115 | -0.192 | 0.305  | -0.011 | 0.712  | 1.00E-33 |
| HEXB      | 0.132  | 0.059  | 0.012  | 0.235  | 0.575  | 1.01E-33 |
| MFSD12    | -0.023 | 0.001  | -0.008 | -0.079 | 0.666  | 1.03E-33 |
| ZMIZ1     | 0.595  | -0.398 | 0.169  | 0.603  | 0.598  | 1.03E-33 |
| FRMD4B    | 0.69   | -0.081 | -0.046 | 0.159  | 0.578  | 1.11E-33 |
| FZD1      | 0.633  | -0.265 | -0.73  | -0.378 | -0.701 | 1.14E-33 |
| RPL3      | 0.062  | 0.134  | 0.17   | 0.305  | 0.511  | 1.22E-33 |
| FKBP1C    | 0.238  | -0.082 | -0.103 | 0.159  | 0.681  | 1.24E-33 |
| PHF10     | 0.146  | 0.094  | -0.091 | -0.302 | 0.481  | 1.24E-33 |
| GALNT7    | 0.35   | 0.216  | 0.117  | 0.401  | 0.914  | 1.28E-33 |
| CMTM3     | 0.147  | -0.113 | 0.06   | 0.179  | 0.642  | 1.41E-33 |
| YIPF5     | 0.5    | -0.033 | -0.324 | -0.231 | -0.435 | 1.55E-33 |
| FAM126A   | -0.111 | -0.004 | -0.029 | 0.056  | 0.514  | 1.56E-33 |
| PHEX      | 0.036  | -0.209 | 0.041  | 0.335  | 1.335  | 1.59E-33 |
| HECA      | 0.868  | 0.201  | 0.192  | 0.366  | 0.667  | 1.60E-33 |
| PAXIP1    | 0.17   | 0.054  | -0.113 | -0.413 | -0.636 | 1.62E-33 |
| LAMP3     | -0.031 | 0.198  | 0.261  | 0.722  | 1.102  | 1.69E-33 |
| ROBO3     | -0.437 | 0.126  | 0.23   | -0.26  | -1.134 | 1.70E-33 |
| ZDHHC23   | 0.5    | 0.217  | 0.037  | -0.354 | -1.159 | 1.70E-33 |
| MMS22L    | 0.301  | 0.144  | -0.256 | -0.328 | -0.551 | 1.77E-33 |
| KIAA1217  | -0.157 | 0.106  | 0.211  | 0.209  | 1.757  | 1.89E-33 |
| ITM2B     | 0.235  | 0.138  | 0.019  | 0.271  | 0.674  | 1.98E-33 |
| NAV2      | -0.125 | -0.26  | 0.164  | 0.136  | 0.675  | 2.04E-33 |
| BCL2L1    | 0.49   | 0.528  | 0.68   | 1.035  | 1.091  | 2.05E-33 |
| NCR3LG1   | 0.463  | 0.266  | 0.116  | -0.306 | -0.507 | 2.16E-33 |
| TDG       | 0.377  | 0.138  | -0.113 | -0.231 | -0.455 | 2.18E-33 |
| CDKN1B    | -0.677 | -0.178 | -0.237 | -0.16  | -0.719 | 2.24E-33 |
| ADAM17    | 0.212  | 0.197  | 0.179  | 0.317  | 0.63   | 2.30E-33 |
| GCNT1     | -0.037 | -0.472 | -0.528 | -0.191 | -0.959 | 2.35E-33 |
| HIST1H2AC | 0.585  | 0.819  | 1.414  | 1.663  | 1.625  | 2.37E-33 |
| DENND6B   | -0.253 | 0.025  | 0.249  | -0.263 | 1.624  | 2.37E-33 |
| REEP3     | 0.015  | 0.015  | 0.019  | 0.029  | 0.695  | 3.00E-33 |
| ATRX      | 0.033  | 0.123  | 0.182  | 0.111  | 0.632  | 3.55E-33 |
| IGHMBP2   | -0.308 | 0.14   | -0.089 | -0.423 | -0.677 | 3.77E-33 |
| ZNF438    | -0.103 | -0.086 | 0.376  | 0.567  | 0.713  | 3.80E-33 |
| CDCA5     | 0.181  | 0.002  | -0.125 | -0.185 | -0.731 | 3.89E-33 |
| DUSP16    | 0.357  | 0.537  | 0.558  | 0.617  | 1.276  | 4.04E-33 |
| SPOCD1    | -0.213 | -0.14  | 0.222  | 0.047  | 0.814  | 4.08E-33 |

|          |        |        |        |        |        |          |
|----------|--------|--------|--------|--------|--------|----------|
| NADSYN1  | -0.062 | 0.413  | 0.536  | 0.239  | 0.666  | 4.10E-33 |
| LAMC1    | 0.317  | 0.22   | 0.154  | 0.476  | 1.129  | 4.14E-33 |
| NUAK1    | 0.228  | 0.112  | -0.33  | -0.491 | -0.658 | 4.30E-33 |
| DOCK1    | 0.35   | 0.115  | 0.116  | 0.444  | 0.83   | 4.56E-33 |
| LYL1     | 0.336  | -0.681 | -0.293 | 0.155  | -0.114 | 4.58E-33 |
| PCDH1    | 0.7    | -0.096 | -0.185 | 0.183  | 0.621  | 4.76E-33 |
| WASF2    | 0.07   | 0.2    | 0.223  | 0.355  | 0.827  | 4.93E-33 |
| DERA     | 0.075  | 0.06   | -0.158 | -0.26  | -0.743 | 5.40E-33 |
| USP54    | -0.155 | -0.026 | -0.145 | 0.078  | 0.796  | 5.46E-33 |
| HMG20A   | 0.057  | 0.119  | 0.15   | 0.493  | 0.836  | 6.05E-33 |
| TGM2     | 0.148  | -0.123 | 0.058  | 0.701  | 1.255  | 7.54E-33 |
| DNAJB11  | 0.303  | 0.142  | -0.068 | 0.169  | -0.56  | 7.63E-33 |
| FAM171A1 | 0.21   | 0.015  | -0.043 | 0.348  | 0.835  | 7.83E-33 |
| PDGFRL   | 0.056  | 0.087  | 0.302  | 0.665  | 1.186  | 7.90E-33 |
| JADE1    | -0.478 | -0.296 | -0.237 | -0.202 | -0.882 | 8.06E-33 |
| MSH6     | 0.714  | -0.05  | -0.582 | -0.441 | -0.294 | 8.13E-33 |
| RRP15    | -0.209 | -0.047 | -0.097 | -0.172 | -0.835 | 9.43E-33 |
| ARHGEF2  | -0.481 | 0.051  | 0.246  | 0.253  | 0.487  | 9.49E-33 |
| PCNT     | -0.278 | 0.079  | 0.056  | -0.504 | -0.784 | 1.01E-32 |
| CCHCR1   | -0.155 | -0.087 | -0.079 | -0.265 | -1.019 | 1.08E-32 |
| SNHG1    | -0.081 | -0.127 | -0.187 | -1.043 | -1.406 | 1.09E-32 |
| CLCN5    | -0.017 | 0.046  | -0.253 | -0.396 | -1.017 | 1.18E-32 |
| NDC80    | -0.505 | -0.85  | -0.606 | 0.003  | -0.522 | 1.19E-32 |
| PLK3     | 1.089  | 0.695  | 0.764  | 0.265  | 0.64   | 1.21E-32 |
| PALLD    | -0.095 | 0.102  | 0.056  | 0.023  | 0.499  | 1.25E-32 |
| PRAG1    | 1.403  | 0.76   | 0.785  | 0.785  | 0.911  | 1.27E-32 |
| SH3BGRL  | 0.153  | 0.003  | 0.067  | 0.206  | 0.641  | 1.28E-32 |
| ATRIP    | -0.064 | 0.133  | -0.112 | -0.277 | -0.86  | 1.34E-32 |
| RASAL2   | 0.045  | -0.096 | -0.154 | -0.121 | 0.627  | 1.44E-32 |
| DHX34    | -0.691 | -0.195 | -0.085 | -0.461 | -0.648 | 1.45E-32 |
| ZNF532   | 0.355  | 0.048  | 0.085  | 0.23   | 0.61   | 1.66E-32 |
| RAI14    | 0.276  | -0.099 | 0.249  | 0.499  | 0.603  | 1.79E-32 |
| CC2D1B   | -0.247 | 0.114  | 0.09   | -0.194 | -0.552 | 1.86E-32 |
| AKAP2    | -0.247 | 0.151  | 0.31   | 0.254  | 1.103  | 2.14E-32 |
| SRC      | 0.19   | 0.317  | 0.218  | 0.434  | 0.894  | 2.26E-32 |
| TRIM44   | 0.194  | 0.029  | 0.155  | 0.214  | 0.594  | 2.36E-32 |
| RIBC2    | -0.222 | 0.055  | 0.234  | -0.308 | -2.195 | 2.36E-32 |
| SUSD6    | 0.434  | 0.442  | 0.399  | 0.086  | 0.738  | 2.40E-32 |



|            |        |        |        |        |        |          |
|------------|--------|--------|--------|--------|--------|----------|
| PDE4D      | 0.821  | 0.971  | 0.666  | 0.53   | 0.906  | 2.43E-32 |
| PLEKHA8    | -0.25  | 0.207  | 0.29   | 0.207  | 0.625  | 2.47E-32 |
| MMP15      | 0.168  | -0.217 | -0.107 | -0.059 | 1.242  | 2.65E-32 |
| RP4-564F22 | -0.37  | -0.259 | -0.34  | -0.976 | -1.101 | 2.70E-32 |
| SYNGAP1    | -0.965 | -0.131 | 0.19   | -0.736 | -0.913 | 2.74E-32 |
| RAD1       | 0.078  | -0.003 | -0.23  | -0.342 | -0.658 | 2.76E-32 |
| ABCA3      | -0.18  | -0.116 | 0.324  | 0.644  | 1.043  | 2.91E-32 |
| KIAA1522   | 0.018  | 0.172  | 0.387  | 0.291  | 1.097  | 3.03E-32 |
| PRSS12     | 0.139  | 0.155  | 0.266  | 0.554  | 1.093  | 3.38E-32 |
| KIF15      | -0.67  | -0.46  | -0.327 | -0.156 | -0.99  | 3.81E-32 |
| IFNAR1     | -0.003 | 0.183  | 0.172  | 0.368  | 0.589  | 4.06E-32 |
| TIE1       | -0.063 | -0.112 | -0.025 | 0.033  | 0.523  | 4.06E-32 |
| SDC4       | 0.537  | 0.487  | 0.064  | -0.038 | 0.641  | 4.32E-32 |
| BTN3A1     | -0.133 | -0.027 | 0.468  | 0.413  | 1.023  | 4.37E-32 |
| CALD1      | 0.345  | 0.024  | 0.017  | 0.274  | 0.953  | 4.91E-32 |
| SYNPO      | 0.211  | -0.05  | 0.289  | 0.265  | 0.507  | 4.96E-32 |
| EML1       | 0.588  | -0.204 | -0.421 | 0.043  | 0.186  | 5.13E-32 |
| APCDD1L    | 0.363  | -0.027 | -0.248 | 0.193  | 0.916  | 5.81E-32 |
| CHST3      | 1.008  | -0.221 | -0.188 | -0.088 | -0.158 | 5.81E-32 |
| REXO2      | 0.171  | 0.035  | 0.022  | 0.265  | 0.545  | 6.00E-32 |
| MON1B      | -0.346 | 0.091  | 0.239  | 0.279  | 0.431  | 6.25E-32 |
| ZNF335     | -0.115 | 0.1    | -0.081 | -0.629 | -0.822 | 6.54E-32 |
| ENOX1      | 0.275  | -0.216 | -0.453 | -0.331 | 0.93   | 6.74E-32 |
| EIF2AK4    | 0.151  | 0.071  | 0.215  | 0.505  | 0.793  | 7.31E-32 |
| TSPAN15    | 0.042  | -0.37  | -0.571 | -0.467 | -0.255 | 7.45E-32 |
| HBEGF      | 0.67   | 0.57   | 0.385  | 0.402  | 0.754  | 7.60E-32 |
| LYN        | 0.498  | -0.175 | -0.656 | -0.328 | -0.164 | 7.60E-32 |
| MBP        | -0.024 | 0.244  | 1.004  | 1.693  | 2.13   | 9.10E-32 |
| BTN3A2     | -0.127 | 0.033  | 0.173  | 0.345  | 0.815  | 9.12E-32 |
| TCERG1     | -0.119 | -0.056 | -0.13  | -0.33  | -0.528 | 9.94E-32 |
| RP11-255G1 | -0.178 | 0.067  | 0.612  | 0.837  | 2.458  | 1.06E-31 |
| SMIM15     | 0.057  | -0.054 | 0.056  | 0.391  | 0.686  | 1.10E-31 |
| CBLN2      | -0.007 | 0.669  | 0.518  | 0.543  | -0.42  | 1.13E-31 |
| MYRIP      | 0.555  | -0.285 | 0.38   | 1.101  | 1.258  | 1.15E-31 |
| SCHIP1     | -0.085 | 0.85   | 1.535  | 1.281  | 2.235  | 1.24E-31 |
| INCENP     | -0.743 | -0.777 | -0.564 | -0.203 | -0.812 | 1.25E-31 |
| FOXC2      | 0.786  | -0.23  | -0.175 | 0.249  | -0.417 | 1.26E-31 |
| TMEM140    | 0.102  | -0.034 | 0.192  | 0.572  | 1.78   | 1.37E-31 |

|            |        |        |        |        |        |          |
|------------|--------|--------|--------|--------|--------|----------|
| CIRBP      | -0.251 | 0.087  | -0.107 | -0.598 | -0.923 | 1.41E-31 |
| TCF3       | 0.111  | -0.138 | -0.211 | 0.017  | 0.519  | 1.46E-31 |
| VAR52      | -0.454 | -0.161 | 0.005  | -0.653 | -0.979 | 1.54E-31 |
| CYP26A1    | -2.08  | -0.601 | -0.947 | -1.879 | -2.427 | 1.59E-31 |
| PSMB9      | 0.065  | 0.433  | 0.738  | 1.047  | 1.989  | 1.61E-31 |
| SERPIN2    | 0.593  | 0.117  | -0.355 | -0.679 | -1.505 | 1.73E-31 |
| PRKAR1B    | 0.272  | 0.019  | 0.549  | 1.018  | 1.218  | 1.75E-31 |
| MMD        | 0.238  | 0.12   | -0.42  | -0.767 | -0.83  | 1.75E-31 |
| MME        | 0.055  | 0.024  | 0.078  | 0.262  | 0.847  | 1.81E-31 |
| TBC1D22B   | 0.212  | 0.547  | 0.44   | 0.484  | 0.904  | 2.17E-31 |
| RNF144B    | -0.482 | -0.213 | -0.411 | -0.303 | -1.147 | 2.37E-31 |
| ARHGAP10   | 0.114  | 0.323  | 0.191  | 0.478  | 0.988  | 2.48E-31 |
| SHROOM2    | 0.163  | 0.034  | 0.114  | 0.478  | 1.172  | 2.60E-31 |
| VIM        | 0.342  | 0.131  | 0.061  | 0.442  | 1.098  | 2.80E-31 |
| TUB        | -0.131 | -0.281 | -0.649 | -1.038 | -1.371 | 2.88E-31 |
| PLEK2      | 0.594  | -0.15  | -0.334 | -0.098 | 0.448  | 3.07E-31 |
| MGAT5      | 0.148  | -0.187 | -0.037 | 0.384  | 0.662  | 3.27E-31 |
| KCTD12     | 0.321  | -0.1   | -0.376 | -0.168 | -1.187 | 3.39E-31 |
| KHNYN      | 0.265  | 0.305  | 0.531  | 0.395  | 0.655  | 3.42E-31 |
| Orai3      | 0.17   | 0.361  | 0.505  | 0.685  | 1.511  | 3.66E-31 |
| TLE4       | 0.549  | 0.668  | 0.468  | 0.558  | 0.988  | 4.12E-31 |
| BNIP2      | 0.35   | 0.019  | 0.062  | 0.313  | 0.547  | 4.12E-31 |
| SEMA3D     | 0.041  | 0.042  | -0.263 | -0.199 | -1.06  | 4.22E-31 |
| TACC1      | -0.101 | -0.131 | 0.014  | 0.07   | 0.485  | 4.23E-31 |
| NR3C2      | -0.363 | -0.083 | 0.141  | 0.615  | 0.985  | 4.48E-31 |
| CBFB       | 0.6    | -0.106 | -0.314 | -0.18  | -0.159 | 4.49E-31 |
| BCL9L      | 0.22   | -0.204 | 0.229  | 0.47   | 0.817  | 4.64E-31 |
| RP11-800A3 | 0.059  | -0.104 | 0.335  | 0.735  | 0.875  | 4.85E-31 |
| TNS2       | -0.638 | -0.314 | -0.003 | -0.323 | -0.673 | 5.54E-31 |
| RMND5B     | -0.317 | 0.071  | 0.358  | 0.395  | 0.41   | 5.58E-31 |
| GTPBP3     | -0.446 | -0.154 | -0.02  | -0.418 | -0.969 | 6.61E-31 |
| CADM4      | 0.185  | 0.613  | 0.567  | 0.73   | 2.118  | 6.67E-31 |
| TES        | 0.755  | 0.181  | 0.073  | 0.412  | 0.028  | 7.70E-31 |
| CEP152     | -0.289 | 0.092  | 0.019  | -0.661 | -1.049 | 7.70E-31 |
| UNC5B      | 1.224  | -0.184 | -0.838 | -0.761 | 0.022  | 8.12E-31 |
| AIG1       | -0.026 | 0.087  | 0.443  | 0.52   | 1.054  | 8.25E-31 |
| C3orf52    | 1.307  | 0.868  | 0.766  | 0.377  | 0.613  | 8.31E-31 |
| ATP8A1     | -0.246 | -0.037 | -0.451 | -0.635 | -1.667 | 8.62E-31 |

|             |        |        |        |        |        |          |
|-------------|--------|--------|--------|--------|--------|----------|
| CAPG        | 0.289  | 0.191  | 0.12   | 0.546  | 1.146  | 9.16E-31 |
| FOXN2       | 0.239  | 0.089  | -0.3   | -0.311 | -0.506 | 9.52E-31 |
| ASCC3       | 0.318  | 0.859  | 0.795  | 1.138  | 1.211  | 9.55E-31 |
| GOLPH3L     | -0.114 | 0.286  | 0.302  | 0.574  | 0.905  | 1.00E-30 |
| HSPA13      | 0.17   | -0.027 | -0.292 | -0.264 | -0.638 | 1.01E-30 |
| AXL         | 0.1    | 0.095  | 0.328  | 0.672  | 0.779  | 1.05E-30 |
| CD44        | 0.327  | 0.121  | -0.009 | 0.348  | 0.817  | 1.06E-30 |
| PARP4       | 0.233  | -0.003 | 0.207  | 0.588  | 0.924  | 1.07E-30 |
| PAWR        | 0.017  | 0.194  | 0.371  | 0.479  | 0.287  | 1.08E-30 |
| RARB        | 0.705  | 0.361  | -0.02  | 0.754  | 1.708  | 1.33E-30 |
| TNFRSF11A   | 0.151  | -0.005 | -0.228 | -0.326 | -1.091 | 1.33E-30 |
| RIN3        | 0.294  | 0.224  | 0.214  | 0.464  | 1.107  | 1.35E-30 |
| AL035209.2  | -1.265 | -0.16  | -0.179 | -1.56  | -1.093 | 1.37E-30 |
| FANCG       | -0.08  | -0.08  | -0.213 | -0.408 | -0.943 | 1.42E-30 |
| CHTF18      | -0.621 | -0.03  | -0.195 | -0.953 | -1.406 | 1.45E-30 |
| BRPF1       | 0.353  | 0.122  | -0.041 | -0.279 | -0.269 | 1.49E-30 |
| SEMA4B      | 0.08   | 0.011  | 0.428  | 0.624  | 1.096  | 1.68E-30 |
| CASC4       | 0.1    | 0.065  | -0.022 | 0.2    | 0.534  | 1.92E-30 |
| SPRED3      | -0.784 | -0.077 | 0.037  | -0.323 | -0.262 | 2.02E-30 |
| EFNA5       | 0.454  | -0.217 | -0.24  | -0.126 | -0.42  | 2.02E-30 |
| PCGF5       | 0.046  | 0.06   | 0.029  | -0.011 | -0.532 | 2.02E-30 |
| CTDSPL2     | 0.376  | 0.126  | -0.197 | -0.117 | -0.319 | 2.06E-30 |
| AC005041.10 | 0.283  | 0.116  | 0.125  | 0.647  | 1.052  | 2.24E-30 |
| RP11-420G6  | -0.127 | -0.402 | 0.281  | 0.76   | 1.268  | 2.27E-30 |
| GNA12       | 0.263  | -0.031 | -0.043 | 0.34   | 0.808  | 2.50E-30 |
| INHBA       | 0.145  | 0.28   | 0.016  | 0.068  | -0.599 | 2.55E-30 |
| LYNX1       | 0.408  | 0.854  | 1.077  | 1.456  | 1.792  | 2.62E-30 |
| COL12A1     | 0.208  | 0.318  | 0.459  | 0.326  | 1.487  | 2.72E-30 |
| RNF38       | 0.577  | 0.236  | 0.15   | 0.189  | 0.581  | 2.81E-30 |
| PANX1       | 0.459  | 0.627  | 0.443  | 0.5    | 1.079  | 2.82E-30 |
| RP11-612L3  | 0.256  | 0.177  | 0.291  | 0.568  | 0.733  | 2.82E-30 |
| SMAD6       | 1.094  | -0.3   | -0.888 | -0.984 | -2.077 | 2.94E-30 |
| VAT1        | 0.22   | 0.016  | 0.034  | 0.524  | 1.095  | 3.20E-30 |
| CAMTA2      | -0.373 | -0.044 | 0.104  | -0.249 | -0.601 | 3.45E-30 |
| PSMB8       | 0.078  | 0.171  | 0.13   | 0.436  | 0.928  | 3.61E-30 |
| ANKIB1      | -0.158 | 0.096  | 0.182  | 0.192  | 0.455  | 3.94E-30 |
| SPAG9       | 0.21   | 0.224  | -0.067 | -0.365 | -0.36  | 3.94E-30 |
| TMEM106C    | -0.469 | -0.082 | 0.111  | -0.176 | -1.107 | 4.01E-30 |

|            |        |        |        |        |        |          |
|------------|--------|--------|--------|--------|--------|----------|
| GRAP       | 0.492  | -0.197 | -0.082 | 0.196  | 0.716  | 4.08E-30 |
| BBS2       | -0.066 | 0.195  | 0.503  | 0.675  | 0.834  | 4.10E-30 |
| TUBA1A     | 0.18   | -0.151 | -0.214 | 0.164  | 0.686  | 4.25E-30 |
| MAP2K3     | 0.474  | 0.289  | 0.361  | 0.606  | 1.049  | 5.27E-30 |
| GPX4       | -0.113 | -0.098 | -0.064 | -0.021 | 0.41   | 5.30E-30 |
| CXCL6      | -0.159 | 0.539  | 0.144  | -0.236 | 0.882  | 6.34E-30 |
| BSDC1      | 0.074  | 0.414  | 0.363  | 0.239  | 0.572  | 7.66E-30 |
| LRRC1      | 0.306  | 0.111  | -0.385 | -0.487 | -0.906 | 7.91E-30 |
| PAQR8      | -0.242 | -0.139 | -0.002 | 0.182  | 0.656  | 8.06E-30 |
| ACER2      | 0.526  | 1.143  | 0.89   | 0.476  | 1.048  | 8.41E-30 |
| HSPA12B    | -0.33  | -0.309 | 0.119  | -0.044 | 0.791  | 1.01E-29 |
| SRSF2      | -0.001 | -0.057 | -0.263 | -0.633 | -0.529 | 1.01E-29 |
| AP000695.6 | 0.295  | 0.075  | 0.699  | 0.873  | 1.46   | 1.03E-29 |
| ZFYVE1     | 0.525  | 0.536  | 0.394  | 0.428  | 0.958  | 1.04E-29 |
| SDK1       | 0.09   | -0.1   | 0.049  | 0.064  | -1.101 | 1.05E-29 |
| FHL1       | 0.226  | -0.004 | -0.049 | 0.292  | 0.798  | 1.09E-29 |
| RP5-1158H2 | 0.432  | 0.207  | 0.199  | 0.482  | -0.716 | 1.12E-29 |
| FSTL1      | 0.273  | 0.073  | -0.06  | 0.281  | 0.662  | 1.15E-29 |
| SDCCAG8    | -0.142 | 0.017  | 0.224  | 0.303  | 0.885  | 1.32E-29 |
| IL4R       | 0.389  | 0.24   | 0.391  | 0.371  | 0.641  | 1.41E-29 |
| ANKH       | 0.691  | 0.1    | -0.371 | -0.27  | -0.232 | 1.45E-29 |
| SYNGR2     | 0.006  | -0.091 | -0.104 | 0.192  | 0.488  | 1.48E-29 |
| RP11-492E3 | 0.176  | -0.185 | 0.315  | 0.569  | 0.197  | 1.58E-29 |
| ACVR1B     | -0.096 | 0.101  | 0.028  | -0.172 | -0.664 | 1.69E-29 |
| ARMC8      | 0.04   | -0.042 | -0.235 | -0.179 | -0.559 | 1.73E-29 |
| SLC4A8     | -0.382 | -0.417 | 0.111  | 0.182  | 0.797  | 1.75E-29 |
| ULK1       | 0.266  | 0.511  | 0.074  | -0.266 | 0.414  | 1.81E-29 |
| MEF2D      | 0.442  | 0.193  | 0.289  | 0.39   | 1.023  | 1.89E-29 |
| AC092066.1 | 0.182  | 0.227  | 0.601  | 0.412  | 0.934  | 1.89E-29 |
| SKA1       | -0.001 | -0.218 | -0.249 | 0.039  | -0.785 | 1.89E-29 |
| OTUD4      | 0.035  | 0.441  | 0.327  | 0.151  | 0.442  | 2.05E-29 |
| PML        | -0.006 | 0.198  | 0.288  | 0.391  | 0.86   | 2.12E-29 |
| FANCD2     | -0.135 | 0.114  | 0.084  | -0.014 | -0.573 | 2.24E-29 |
| MAFF       | -0.234 | 0.491  | 0.46   | 0.233  | 0.669  | 2.25E-29 |
| C16orf52   | -0.061 | -0.06  | -0.137 | -0.535 | -0.962 | 2.39E-29 |
| CCDC41     | -0.447 | 0.254  | 0.24   | -0.273 | -0.879 | 2.53E-29 |
| CLN6       | 0.077  | -0.068 | -0.258 | -0.213 | -0.984 | 2.66E-29 |
| PDE7B      | -0.799 | -0.346 | -0.117 | 0.059  | 0.247  | 2.77E-29 |

|            |        |        |        |        |        |          |
|------------|--------|--------|--------|--------|--------|----------|
| RNMT       | 0.143  | 0.279  | 0.262  | 0.242  | 0.708  | 3.09E-29 |
| RAVER2     | 0.547  | 0.033  | -0.263 | -0.344 | -0.426 | 3.30E-29 |
| AC007250.3 | 0.119  | 0.032  | 0.122  | 0.344  | 0.693  | 3.34E-29 |
| TRIM46     | -1.143 | -0.261 | 0.056  | -0.51  | -0.239 | 3.38E-29 |
| EIF3L      | 0.234  | 0.169  | 0.228  | 0.429  | 0.684  | 3.68E-29 |
| RFX5       | -0.276 | 0.099  | 0.271  | 0.314  | 0.456  | 3.74E-29 |
| CBLN3      | -1.016 | 0.169  | 0.677  | -0.219 | 0.94   | 3.91E-29 |
| S100A16    | 0.084  | -0.097 | -0.088 | 0.209  | 0.471  | 3.97E-29 |
| SLC4A7     | -0.32  | 0.004  | 0.094  | -0.077 | 0.529  | 4.04E-29 |
| FADS3      | -0.208 | 0.268  | 0.546  | 0.285  | 0.861  | 4.08E-29 |
| PRKAG2     | 0.139  | 0.243  | 0.474  | 0.494  | 0.841  | 4.20E-29 |
| TMEM201    | -0.209 | -0.285 | -0.467 | -0.577 | -1.031 | 4.20E-29 |
| BIRC5      | -0.528 | -0.629 | -0.731 | -0.558 | -0.465 | 4.25E-29 |
| ATF7IP     | 0.267  | -0.085 | -0.28  | -0.038 | 0.541  | 4.27E-29 |
| MVD        | 0.43   | -0.169 | -0.504 | -0.637 | -0.292 | 4.35E-29 |
| SAMSN1     | 0.683  | 0.067  | -0.346 | -0.106 | -0.463 | 4.35E-29 |
| RFX2       | 1.24   | 0.035  | 0.165  | 0.46   | -0.401 | 4.36E-29 |
| NAB2       | 0.463  | -0.014 | -0.442 | -0.619 | -0.786 | 4.73E-29 |
| ST13       | 0.291  | 0.151  | 0.106  | 0.49   | 0.711  | 4.90E-29 |
| SH3PXD2B   | 0.019  | -0.425 | -0.166 | 0.039  | 0.677  | 5.18E-29 |
| PYCARD     | 0      | -0.24  | -0.109 | 0.192  | 1.122  | 5.42E-29 |
| HMGB2      | -0.331 | -0.69  | -0.632 | -0.279 | -0.707 | 5.46E-29 |
| NFXL1      | -0.105 | 0.161  | 0.078  | -0.302 | -0.704 | 5.86E-29 |
| MEX3A      | 0.034  | -0.039 | -0.123 | 0.082  | 0.948  | 5.90E-29 |
| ANPEP      | 0.351  | 0.052  | -0.012 | 0.408  | 1.049  | 6.31E-29 |
| C16orf59   | -0.268 | -0.145 | -0.284 | -0.689 | -1.097 | 6.31E-29 |
| ATP6AP2    | 0.14   | 0.1    | 0.056  | 0.379  | 0.58   | 6.47E-29 |
| EMG1       | 0.143  | -0.001 | 0.044  | 0.019  | -0.686 | 6.74E-29 |
| MANF       | 0.228  | -0.212 | -0.188 | -0.007 | -0.496 | 6.77E-29 |
| SNRPA1     | -0.065 | 0.094  | 0.037  | -0.086 | -0.719 | 7.97E-29 |
| TRIM56     | -0.319 | 0.163  | 0.449  | 0.023  | 0.282  | 8.03E-29 |
| ABHD3      | -0.236 | 0.041  | -0.021 | -0.85  | -1.361 | 8.39E-29 |
| MMS19      | -0.014 | -0.003 | 0.125  | 0.112  | 0.533  | 8.50E-29 |
| MEGF8      | -0.113 | 0.072  | 0.12   | 0.117  | 0.534  | 9.16E-29 |
| NDOR1      | -0.418 | -0.011 | -0.132 | -0.721 | -0.805 | 9.77E-29 |
| C19orf66   | -0.307 | 0.282  | 0.505  | 0.265  | 0.743  | 1.00E-28 |
| RPL13A     | -0.067 | 0.008  | 0.128  | 0.134  | 0.657  | 1.04E-28 |
| KANK3      | 0.032  | 0.28   | 0.628  | 0.315  | 1.169  | 1.06E-28 |

|            |        |        |        |        |        |          |
|------------|--------|--------|--------|--------|--------|----------|
| ANKRD26P1  | -0.221 | 1.201  | 1.843  | 1.259  | 2.191  | 1.13E-28 |
| CLK2       | -0.455 | 0.07   | 0      | -0.827 | -0.949 | 1.13E-28 |
| RBCK1      | -0.2   | -0.012 | 0.139  | 0.019  | 0.527  | 1.14E-28 |
| PIM3       | -0.669 | -0.045 | -0.521 | -0.716 | -0.328 | 1.16E-28 |
| FLOT2      | -0.101 | -0.114 | 0.106  | 0.519  | 0.818  | 1.18E-28 |
| SNCAIP     | -0.496 | -0.474 | -0.06  | -0.354 | 1.364  | 1.19E-28 |
| XRCC3      | -0.344 | -0.056 | -0.22  | -0.628 | -1.034 | 1.29E-28 |
| FBXL2      | -0.315 | -0.503 | -0.084 | -0.13  | 0.597  | 1.35E-28 |
| TTLL4      | -0.485 | -0.233 | -0.159 | -0.432 | -0.653 | 1.44E-28 |
| NECAP2     | 0.11   | 0.135  | 0.171  | 0.415  | 0.77   | 1.66E-28 |
| STK38L     | 0.554  | -0.089 | -0.306 | -0.175 | 0.344  | 1.70E-28 |
| ATG16L2    | -0.548 | 0.874  | 1.135  | 0.066  | 0.179  | 1.74E-28 |
| NOX4       | 0.175  | 0.117  | 0.201  | 0.227  | 0.757  | 1.76E-28 |
| SH3GLB1    | 0.186  | -0.07  | -0.091 | 0.129  | 0.449  | 2.01E-28 |
| DACH1      | -0.26  | -0.148 | -1.007 | -1.05  | 0.805  | 2.02E-28 |
| VPS13C     | -0.295 | 0.133  | 0.378  | 0.186  | 0.599  | 2.02E-28 |
| RANBP6     | -0.141 | -0.141 | -0.007 | 0.321  | 0.353  | 2.09E-28 |
| TCF7L1     | -0.026 | -0.128 | 0.234  | 0.387  | 0.811  | 2.36E-28 |
| TRAF3      | 0.167  | 0.429  | 0.202  | 0.116  | 0.686  | 2.38E-28 |
| GLYCTK     | -0.407 | 0.113  | -0.003 | -0.335 | -1.037 | 2.52E-28 |
| HAPLN1     | -0.023 | -0.107 | -0.429 | -0.198 | -1.23  | 2.52E-28 |
| ZFP90      | -0.267 | 0.421  | 0.47   | -0.003 | 0.544  | 2.53E-28 |
| RP4-794H19 | 0.268  | 0.394  | 0.778  | 0.538  | 2.215  | 2.69E-28 |
| EZH2       | -0.138 | -0.136 | -0.261 | -0.737 | -1.018 | 2.71E-28 |
| GLIS2      | 0.915  | 0.204  | 0.141  | 0.096  | 0.69   | 2.78E-28 |
| FAM167B    | -0.273 | -0.424 | 0.472  | 0.337  | 1.785  | 2.97E-28 |
| ACSF2      | -0.51  | -0.137 | 0.035  | 0.235  | 1.153  | 2.97E-28 |
| PAM        | 0.315  | 0.204  | 0.1    | 0.458  | 0.867  | 3.01E-28 |
| POLE2      | 0.016  | -0.076 | -0.215 | -0.403 | -1.025 | 3.05E-28 |
| IGFBP7     | 0.219  | 0.076  | 0.001  | 0.32   | 0.735  | 3.06E-28 |
| TMEM171    | 0.093  | -0.09  | -0.029 | 0.071  | -1.208 | 3.15E-28 |
| PIK3C2B    | -0.728 | -0.577 | -0.018 | 0.008  | 0.27   | 3.18E-28 |
| CD99       | 0.106  | -0.056 | -0.053 | 0.22   | 0.514  | 3.26E-28 |
| CDS2       | 0.103  | 0.107  | 0.186  | 0.319  | 0.58   | 3.39E-28 |
| DPY19L3    | -0.002 | 0.054  | -0.037 | -0.287 | -0.711 | 3.56E-28 |
| CTPS1      | 0.198  | 0.215  | 0.067  | 0.038  | -0.339 | 3.75E-28 |
| GALNT15    | -0.241 | 0.044  | 1.002  | 1.283  | 1.395  | 3.76E-28 |
| ANKRD12    | 0.639  | 0.267  | 0.017  | -0.134 | -0.047 | 3.90E-28 |

|            |        |        |        |        |        |          |
|------------|--------|--------|--------|--------|--------|----------|
| WNT9A      | -0.125 | 0.45   | 0.945  | 0.235  | 1.874  | 3.96E-28 |
| PHF1       | -0.058 | 0.403  | 0.264  | -0.325 | -0.575 | 4.20E-28 |
| TRPM3      | -0.785 | -0.124 | -0.496 | -1.301 | -1.536 | 4.33E-28 |
| FOXO1      | 0.586  | 0.567  | 0.406  | 0.49   | 0.888  | 4.40E-28 |
| ZNF71      | 0.175  | 0.33   | 0.051  | 0.288  | 0.965  | 4.47E-28 |
| MARVELD1   | 0.066  | 0.075  | 0.085  | 0.258  | 0.617  | 4.55E-28 |
| VPS37B     | 0.558  | 0.264  | 0.336  | 0.553  | 0.893  | 4.60E-28 |
| CHD7       | 0.379  | -0.046 | -0.219 | -0.578 | 0.718  | 4.67E-28 |
| LAMB3      | -0.039 | 0.174  | 0.222  | 0.601  | 1.339  | 4.72E-28 |
| CNTROB     | -0.433 | -0.147 | -0.029 | -0.306 | -0.734 | 6.33E-28 |
| MB21D1     | 0.511  | 0.163  | -0.315 | -0.495 | -0.455 | 6.47E-28 |
| PABPC1     | 0.118  | 0.192  | 0.174  | 0.25   | 0.524  | 6.57E-28 |
| LYPD1      | 0.107  | -0.335 | -0.249 | 0.111  | 0.701  | 6.61E-28 |
| AKAP1      | -0.162 | 0.028  | -0.027 | -0.167 | -0.567 | 6.82E-28 |
| AJUBA      | 0.012  | 0.181  | 0.547  | 0.603  | 0.517  | 7.01E-28 |
| RFC2       | 0.286  | 0.034  | -0.355 | -0.179 | -0.7   | 7.37E-28 |
| NAP1L1     | 0.283  | 0.283  | 0.238  | 0.42   | 0.569  | 7.52E-28 |
| SLC25A29   | -0.816 | -0.315 | -0.18  | -1.007 | -0.816 | 8.10E-28 |
| CALCOCO1   | -0.203 | 0.324  | 0.457  | 0.173  | 0.527  | 9.21E-28 |
| HMGA1      | 0.129  | 0.007  | 0.081  | 0.47   | 0.947  | 9.79E-28 |
| OSGIN1     | 0.146  | 0.337  | -0.261 | -0.281 | -1.217 | 1.00E-27 |
| CREB3L2    | 0.006  | -0.104 | 0.061  | 0.201  | 0.759  | 1.01E-27 |
| SLC10A7    | 0.013  | 0.036  | -0.121 | -0.231 | -0.834 | 1.11E-27 |
| PIK3R3     | 0.795  | -0.05  | -0.054 | 0.308  | 0.147  | 1.22E-27 |
| ADAM15     | -0.047 | -0.053 | -0.012 | 0.225  | 0.656  | 1.23E-27 |
| TMEM173    | 0.237  | 0.369  | 0.548  | 0.608  | 0.411  | 1.25E-27 |
| RFLNB      | 0.163  | 0.139  | -0.121 | -0.407 | -0.58  | 1.26E-27 |
| KRT17      | 0.138  | 0.682  | 1.19   | 1.62   | 2.149  | 1.28E-27 |
| RP11-541M1 | -0.502 | -0.172 | 0.547  | 0.634  | 1.54   | 1.29E-27 |
| PBK        | -0.401 | -0.532 | -0.512 | -0.236 | -0.891 | 1.31E-27 |
| VEGFB      | -0.02  | -0.037 | 0.165  | 0.19   | 0.677  | 1.34E-27 |
| FADS2      | 0.32   | -0.144 | -0.477 | -0.432 | 0.47   | 1.37E-27 |
| MLLT3      | -0.137 | -0.415 | -0.104 | 0.306  | 0.942  | 1.45E-27 |
| SKIL       | 0.737  | 0.197  | 0.457  | 0.421  | 0.337  | 1.45E-27 |
| NETO2      | 0.097  | -0.059 | -0.204 | -0.182 | 0.458  | 1.60E-27 |
| HAUS3      | -0.16  | 0.016  | -0.162 | -0.376 | -0.936 | 1.63E-27 |
| MYLK2      | -0.044 | -0.404 | 0.19   | 0.522  | 1.666  | 1.67E-27 |
| FAM20C     | 0.406  | -0.216 | -0.231 | 0.076  | 0.581  | 1.67E-27 |

|            |        |        |        |        |        |          |
|------------|--------|--------|--------|--------|--------|----------|
| BMP1       | -0.032 | 0.157  | 0.181  | 0.044  | 0.53   | 1.67E-27 |
| BRIX1      | 0.157  | -0.019 | -0.289 | -0.162 | -0.558 | 1.71E-27 |
| DOLPP1     | -0.091 | -0.016 | -0.252 | -0.224 | -0.876 | 1.83E-27 |
| UBE2T      | -0.454 | -0.529 | -0.534 | -0.942 | -1.523 | 1.91E-27 |
| ARHGEF39   | -1.641 | -1.278 | -0.793 | -0.828 | -1.656 | 1.92E-27 |
| FGF5       | -0.048 | 0.47   | 0.41   | 0.658  | 0.636  | 1.97E-27 |
| CLEC14A    | 0.124  | -0.277 | -0.589 | -0.172 | -0.754 | 2.03E-27 |
| GIMAP8     | -0.477 | 0.157  | -0.083 | 0.01   | -0.945 | 2.04E-27 |
| FANCE      | -0.069 | -0.247 | -0.371 | -0.569 | -1.044 | 2.09E-27 |
| FAM53C     | 0.472  | 0.159  | 0.008  | 0.104  | 0.488  | 2.11E-27 |
| DDX60      | -0.097 | 0.009  | 0.407  | 0.641  | 1.054  | 2.15E-27 |
| LURAP1L    | -0.905 | -0.049 | 0.119  | 0.358  | 1.22   | 2.20E-27 |
| FCHO2      | 0.538  | 0.711  | 0.647  | 0.472  | 0.657  | 2.35E-27 |
| CYLD       | 0.231  | 0.638  | 0.385  | 0.312  | 0.682  | 2.50E-27 |
| RASSF4     | -0.337 | 0.192  | 0.641  | 0.636  | 1.271  | 2.55E-27 |
| MIS12      | -0.206 | -0.071 | -0.116 | -0.6   | -0.931 | 2.61E-27 |
| ZNF467     | -0.55  | -0.833 | -0.506 | -0.71  | -1.783 | 2.69E-27 |
| RBMS2      | 0.036  | 0.047  | 0.3    | 0.443  | 0.364  | 2.72E-27 |
| COPS8      | 0.282  | 0.121  | -0.097 | 0.02   | -0.485 | 2.74E-27 |
| PPP1R3B    | -0.003 | 0.089  | 0.214  | 0.439  | 0.87   | 2.87E-27 |
| EPHA5      | -0.11  | -0.142 | -0.61  | -0.831 | -1.448 | 2.91E-27 |
| RSRC2      | 0.235  | 0.049  | -0.125 | -0.446 | -0.388 | 2.97E-27 |
| C15orf52   | -0.728 | -0.046 | 0.719  | 0.24   | 0.401  | 3.20E-27 |
| FAM50B     | -0.451 | -0.764 | -0.116 | 0.513  | 0.356  | 3.24E-27 |
| EEF1E1     | -0.286 | -0.207 | -0.338 | -0.915 | -1.538 | 3.28E-27 |
| PELI1      | 0.1    | 0.025  | 0.174  | 0.28   | 0.762  | 3.32E-27 |
| HNRNPDL    | 0.047  | 0.034  | -0.152 | -0.737 | -0.757 | 3.46E-27 |
| ANKRD33B   | 0.768  | 0.583  | 0.178  | 0.097  | 0.178  | 3.61E-27 |
| AL162151.1 | 0.118  | 0.089  | 0.217  | 0.346  | 0.511  | 3.70E-27 |
| NLRP1      | 0.066  | 0.58   | 0.713  | 0.264  | 0.313  | 3.70E-27 |
| LTA4H      | 0.17   | 0.226  | 0.316  | 0.768  | 0.909  | 3.76E-27 |
| ENTPD5     | 0.003  | 0.158  | 0.279  | 0.14   | -0.403 | 3.92E-27 |
| CDIP1      | 0.458  | 0.81   | 0.896  | 1.123  | 1.118  | 4.14E-27 |
| HELZ2      | 0.048  | 0.617  | 0.524  | 0.125  | 0.675  | 4.15E-27 |
| BANP       | -1.222 | -0.23  | -0.154 | -0.333 | -0.376 | 4.24E-27 |
| AC005363.9 | -0.346 | -0.095 | -0.147 | -1.146 | -1.473 | 4.48E-27 |
| MEX3C      | 0.391  | 0.095  | 0.006  | 0.444  | 0.841  | 4.51E-27 |
| GCH1       | 0.896  | 0.433  | -0.13  | -0.283 | -0.335 | 4.54E-27 |



|            |        |        |        |        |        |          |
|------------|--------|--------|--------|--------|--------|----------|
| SLC17A9    | -0.357 | -0.315 | -0.298 | -0.995 | -1.034 | 5.07E-27 |
| RP11-255M2 | 0.044  | -0.102 | 0.114  | 0.401  | 0.807  | 5.17E-27 |
| SERPINB8   | 0.685  | 0.115  | -0.125 | 0.103  | 0.137  | 5.33E-27 |
| NEK9       | 0.13   | 0.102  | 0.26   | 0.399  | 0.562  | 5.35E-27 |
| FOXP1      | -0.017 | -0.137 | -0.075 | 0.295  | 0.633  | 5.87E-27 |
| EEF1A1P5   | 0.147  | 0.144  | 0.219  | 0.308  | 0.585  | 6.47E-27 |
| KB-176G8.1 | 0.267  | 0.306  | 0.961  | 0.704  | 1.863  | 7.60E-27 |
| EFL1       | 0.305  | 0.169  | 0.437  | 1.012  | 1.085  | 7.73E-27 |
| PLPP4      | 0.402  | -0.043 | -0.388 | -0.603 | -0.441 | 7.74E-27 |
| SLCO4A1    | -0.133 | -0.32  | -0.147 | -0.371 | -1.34  | 8.55E-27 |
| PTS        | -0.127 | -0.038 | -0.061 | -0.532 | -1.092 | 8.79E-27 |
| PAN2       | -0.713 | -0.145 | 0.318  | -0.334 | -0.711 | 8.86E-27 |
| E2F4       | 0.194  | -0.21  | -0.217 | -0.217 | -0.534 | 9.01E-27 |
| ABCC3      | -0.056 | -0.073 | 0.346  | 0.19   | 0.827  | 9.03E-27 |
| RYBP       | 0.728  | 0.094  | -0.131 | 0.064  | 0.329  | 1.01E-26 |
| SLC25A19   | -0.341 | -0.297 | -0.267 | -0.446 | -1.105 | 1.15E-26 |
| TRMT2A     | -0.351 | 0.101  | -0.003 | -0.326 | -0.692 | 1.17E-26 |
| RP1-222E13 | -0.283 | -0.177 | -0.264 | -0.494 | -0.928 | 1.18E-26 |
| PITPNA     | 0.334  | 0.004  | -0.106 | 0.196  | 0.673  | 1.21E-26 |
| MT-TP      | -0.372 | 0.02   | 0.363  | -1.328 | -1.284 | 1.22E-26 |
| H2AFX      | -0.526 | -0.741 | -0.723 | -0.366 | -0.877 | 1.23E-26 |
| YES1       | 0.109  | -0.164 | -0.134 | 0.157  | 0.376  | 1.26E-26 |
| UBE2S      | -0.442 | -0.657 | -0.909 | -0.886 | -0.253 | 1.30E-26 |
| TANK       | -0.228 | 0.166  | 0.318  | 0.239  | 0.799  | 1.34E-26 |
| ELF4       | 0.74   | -0.002 | 0.014  | 0.238  | 0.497  | 1.37E-26 |
| GCKR       | -0.444 | 0.474  | 0.699  | 0.109  | -0.244 | 1.39E-26 |
| POLQ       | -0.622 | -0.219 | -0.261 | -0.638 | -0.935 | 1.51E-26 |
| ATP13A3    | 0.489  | 0.013  | -0.401 | -0.33  | -0.333 | 1.53E-26 |
| CSF3       | -1.789 | -0.501 | 0.25   | -0.337 | 0.392  | 1.54E-26 |
| RP11-382A2 | 0.366  | 0.065  | -0.21  | -0.268 | 0.005  | 1.56E-26 |
| PREB       | -0.133 | -0.035 | -0.026 | -0.046 | -0.559 | 1.64E-26 |
| CCDC71L    | -0.66  | -0.101 | -0.39  | -0.358 | -0.684 | 1.70E-26 |
| TPCN2      | -0.293 | 0.279  | 0.003  | -0.445 | -0.711 | 1.71E-26 |
| GDPD5      | -0.397 | -0.264 | 0.11   | -0.189 | 0.648  | 2.31E-26 |
| RDX        | 0.287  | 0.01   | -0.346 | -0.301 | -0.267 | 2.34E-26 |
| CRTAP      | 0.021  | 0.004  | 0.035  | 0.117  | 0.549  | 2.36E-26 |
| LZTS3      | -0.263 | 0.557  | 0.785  | 0.535  | 1.064  | 2.37E-26 |
| TRIB3      | -0.296 | -0.026 | 0.328  | 0.67   | 0.834  | 2.43E-26 |

|             |        |        |        |        |        |          |
|-------------|--------|--------|--------|--------|--------|----------|
| RRAD        | 0.893  | 1.526  | 1.087  | 0.278  | 2.465  | 2.56E-26 |
| MCM4        | 0.538  | 0.034  | -0.495 | -0.496 | -0.635 | 2.57E-26 |
| NRCAM       | 0.273  | 0.074  | -0.265 | -0.043 | -1.036 | 2.63E-26 |
| SDF2L1      | -0.041 | -0.304 | -0.4   | -0.368 | -0.989 | 2.68E-26 |
| RP11-475N2  | 0.174  | -0.28  | -0.202 | -0.41  | -0.81  | 2.77E-26 |
| RP11-356J5. | -0.015 | -0.288 | -0.359 | -0.507 | -1.278 | 2.95E-26 |
| RSAD1       | -0.498 | -0.193 | -0.049 | -0.236 | 0.183  | 2.98E-26 |
| PLXNA1      | -0.128 | -0.202 | -0.214 | -0.102 | 0.427  | 3.08E-26 |
| CTSF        | -0.063 | -0.001 | -0.077 | 0.067  | 0.745  | 3.14E-26 |
| IL11        | 1.145  | 0.329  | -0.282 | -0.618 | -0.61  | 3.16E-26 |
| FBLN5       | 0.389  | 0.053  | -0.248 | 0.067  | -1.244 | 3.16E-26 |
| NABP1       | -0.734 | 0.409  | 0.403  | -0.574 | -0.652 | 3.23E-26 |
| MEF2C       | 0.719  | -0.131 | -0.135 | 0.178  | -0.092 | 3.24E-26 |
| TIFA        | 0.173  | 0.366  | -0.242 | -0.447 | 0.645  | 3.31E-26 |
| ATG3        | -0.097 | -0.136 | -0.207 | -0.241 | -0.68  | 3.43E-26 |
| PLCXD2      | -0.577 | 0.46   | 0.762  | 0.359  | 1.074  | 3.52E-26 |
| IFNGR2      | -0.015 | 0.106  | 0.05   | 0.087  | 0.667  | 3.56E-26 |
| EPT1        | -0.013 | 0.031  | -0.376 | -0.631 | -0.577 | 3.68E-26 |
| EIF5        | 0.398  | 0.12   | 0.033  | 0.105  | -0.062 | 3.76E-26 |
| PCNX2       | 0.025  | 0.269  | 0.479  | 0.251  | 0.92   | 3.84E-26 |
| ZFP36L1     | -0.386 | 0.272  | 0.159  | 0.134  | 0.379  | 3.96E-26 |
| SMIM13      | 0.318  | -0.082 | -0.192 | -0.263 | -0.323 | 3.96E-26 |
| GNPDA1      | -0.117 | -0.026 | 0.194  | 0.477  | 0.499  | 4.19E-26 |
| ZNF641      | -0.002 | 0.055  | -0.145 | -0.474 | -1.016 | 4.27E-26 |
| CENPN       | 0.086  | -0.005 | -0.071 | 0.022  | -0.494 | 4.33E-26 |
| KIFC1       | -0.573 | -0.574 | -0.404 | -0.169 | -0.901 | 4.33E-26 |
| GBX2        | -0.658 | -0.588 | -0.528 | -0.241 | -1.071 | 4.48E-26 |
| VIMP        | 0.207  | -0.087 | -0.18  | -0.105 | -0.416 | 4.81E-26 |
| CTSO        | 0.271  | 0.342  | 0.219  | 0.537  | 1.147  | 4.85E-26 |
| EIF4EBP2    | 0.372  | 0.216  | 0.119  | 0.166  | 0.468  | 4.91E-26 |
| NEIL3       | -0.687 | -0.615 | -0.403 | -0.273 | -1.181 | 5.10E-26 |
| KDM7A       | 1.15   | 0.19   | 0.109  | -0.299 | 0.648  | 5.18E-26 |
| GCC2        | 0.332  | 0.519  | 0.474  | 0.474  | 0.754  | 5.25E-26 |
| NRP2        | 0.092  | -0.027 | -0.086 | 0.206  | 0.774  | 5.30E-26 |
| SLC45A3     | -0.011 | -0.621 | -0.067 | 0.323  | 0.395  | 5.31E-26 |
| RNF130      | 0.07   | 0.01   | 0.019  | 0.211  | 0.548  | 5.37E-26 |
| MIR126      | -1.12  | -0.38  | -0.499 | -1.52  | -1.718 | 5.51E-26 |
| EIF5A2      | 0.158  | -0.163 | -0.53  | -0.791 | -0.592 | 5.52E-26 |

|            |        |        |        |        |        |          |
|------------|--------|--------|--------|--------|--------|----------|
| KDM3A      | 0.799  | 0.198  | -0.1   | -0.131 | 0.264  | 5.62E-26 |
| ZNF365     | 0.714  | -0.391 | -0.132 | 0.241  | 0.65   | 5.74E-26 |
| ESYT2      | 0.313  | 0.094  | 0.008  | 0.156  | 0.587  | 5.87E-26 |
| FAXDC2     | -0.137 | 0.136  | 0.526  | 0.903  | 2.254  | 5.91E-26 |
| CASC5      | -0.542 | -0.492 | -0.411 | -0.147 | -0.728 | 6.03E-26 |
| PRKCE      | 0.645  | -0.121 | -0.038 | 0.431  | 0.564  | 6.12E-26 |
| AC018766.5 | -0.591 | -0.16  | 0.018  | -0.996 | -1.358 | 6.22E-26 |
| SH3PXD2A   | -0.4   | -0.417 | 0.424  | 0.183  | 0.842  | 6.41E-26 |
| EXOSC8     | -0.199 | -0.132 | -0.218 | -0.353 | -0.908 | 6.42E-26 |
| GIMAP6     | -0.308 | -0.01  | 0.138  | 0.358  | 0.439  | 7.47E-26 |
| PGLS       | 0.083  | 0.072  | 0.086  | 0.369  | 0.813  | 7.76E-26 |
| SHANK1     | -0.36  | -0.064 | 0.234  | 0.037  | 0.855  | 7.87E-26 |
| LNX2       | 0.637  | -0.116 | -0.136 | 0.064  | 0.007  | 8.19E-26 |
| HOXB4      | -0.992 | -0.264 | -0.176 | -0.244 | -0.091 | 8.33E-26 |
| CHML       | 0.202  | 0.138  | -0.084 | 0.056  | -0.546 | 9.05E-26 |
| CUTA       | 0.01   | -0.158 | -0.09  | 0.175  | 0.605  | 9.25E-26 |
| SPNS2      | 0.111  | -0.335 | -0.327 | -0.343 | 0.201  | 9.84E-26 |
| EXTL2      | 0.049  | 0.036  | -0.208 | -0.19  | -0.561 | 1.15E-25 |
| NCOA7      | 0.119  | 0.073  | -0.462 | -0.479 | -0.388 | 1.27E-25 |
| RFWD2      | -0.008 | 0.055  | 0.078  | 0.358  | 0.475  | 1.30E-25 |
| RNF122     | 0.44   | 0.493  | 0.208  | 0.481  | 1.307  | 1.32E-25 |
| ARL6IP6    | 0.02   | -0.18  | -0.397 | -0.529 | -0.496 | 1.33E-25 |
| PFDN1      | 0.089  | -0.073 | -0.084 | 0.063  | 0.409  | 1.34E-25 |
| RGL1       | 0.349  | 0.493  | 0.521  | 0.458  | 1.199  | 1.35E-25 |
| FANCB      | -0.122 | -0.093 | -0.481 | -0.77  | -1.134 | 1.42E-25 |
| HOXA9      | 0.537  | -0.132 | 0.035  | 0.051  | -0.25  | 1.44E-25 |
| PANK3      | 0.452  | 0.158  | -0.026 | -0.106 | 0.184  | 1.50E-25 |
| TSPYL2     | -0.155 | 0.019  | 0.002  | -0.632 | -0.747 | 1.56E-25 |
| ARAP1      | -0.178 | 0.264  | 0.472  | 0.338  | 0.424  | 1.59E-25 |
| STOML1     | -0.242 | -0.179 | -0.15  | -0.057 | -0.967 | 1.59E-25 |
| EPG5       | -0.058 | 0.177  | 0.32   | 0.41   | 0.613  | 1.67E-25 |
| ZNF385A    | 0.36   | 0.612  | 0.81   | 0.941  | 1.253  | 1.77E-25 |
| PTP4A1     | 0.659  | 0.472  | 0.286  | 0.307  | 0.285  | 1.80E-25 |
| PRDX2      | 0.211  | 0.078  | 0.035  | 0.439  | 0.752  | 1.82E-25 |
| ADRB2      | 0.056  | 0.603  | 0.74   | 0.669  | 0.233  | 1.84E-25 |
| LUZP1      | 0.598  | 0.146  | 0.199  | 0.442  | 0.827  | 1.95E-25 |
| MLXIP      | 0.286  | 0.132  | 0.214  | 0.174  | 0.688  | 1.95E-25 |
| NHSL2      | -0.361 | -0.427 | 0.128  | 0.261  | 0.317  | 2.10E-25 |

|            |        |        |        |        |        |          |
|------------|--------|--------|--------|--------|--------|----------|
| ZSCAN30    | -0.539 | -0.021 | 0.556  | 0.054  | 0.301  | 2.29E-25 |
| FAM111A    | -0.642 | 0.036  | 0.19   | -0.322 | -0.796 | 2.50E-25 |
| PTGIR      | -0.541 | 0.431  | 0.656  | 0.523  | 1.817  | 2.59E-25 |
| TMCC1      | 0.009  | 0.041  | 0.299  | 0.471  | 0.895  | 2.82E-25 |
| YPEL5      | 0.054  | 0.204  | 0.212  | 0.076  | 0.795  | 2.83E-25 |
| SLC2A8     | 0.047  | -0.188 | -0.383 | -0.482 | -0.772 | 2.87E-25 |
| GNAI2      | 0.214  | 0.039  | 0.042  | 0.44   | 0.886  | 3.10E-25 |
| RP11-244O1 | 0.063  | -0.545 | 0.314  | 0.982  | 1.175  | 3.11E-25 |
| PTGR1      | 0.156  | 0.257  | 0.189  | 0.563  | 0.629  | 3.18E-25 |
| ADAMTS9    | -0.612 | -0.227 | 0.215  | 0.286  | -0.131 | 3.22E-25 |
| SLC8B1     | -0.105 | 0.039  | 0.156  | 0.136  | 0.589  | 3.25E-25 |
| NHSL1      | -0.056 | -0.232 | -0.254 | -0.426 | 0.367  | 3.25E-25 |
| CEP170     | -0.076 | 0.033  | 0.074  | 0.252  | 0.606  | 3.31E-25 |
| APBA2      | 0.265  | -0.06  | 0.038  | 0.234  | 0.806  | 3.43E-25 |
| TGFBR3     | -0.024 | -0.12  | -0.261 | -0.265 | -0.864 | 4.09E-25 |
| SPECC1     | 0.115  | 0.045  | -0.416 | -0.48  | 0.278  | 4.19E-25 |
| PLXNA4     | 0.059  | -0.201 | -0.551 | -0.071 | -1.044 | 4.28E-25 |
| PPP1R14B   | -0.105 | -0.149 | -0.141 | -0.187 | 0.449  | 4.31E-25 |
| SLC2A6     | -0.015 | 0.361  | 0.146  | 0.041  | 0.609  | 4.45E-25 |
| AFG3L1P    | -0.258 | 0.064  | 0.065  | -0.875 | -1.008 | 4.79E-25 |
| CMIP       | 0.406  | -0.159 | 0.087  | 0.517  | 0.775  | 5.06E-25 |
| ZNF654     | 0.821  | 0.518  | 0.358  | 0.004  | 0.347  | 5.07E-25 |
| ZNF76      | -0.338 | 0.101  | 0.248  | -0.04  | -0.427 | 5.31E-25 |
| PI4KAP1    | -0.255 | 0.482  | 0.229  | -0.75  | -0.686 | 5.36E-25 |
| ZNF561     | 0.087  | 0.645  | 0.754  | 0.331  | 0.82   | 5.47E-25 |
| ZNF436     | 0.98   | 0.601  | 0.324  | 0.27   | 0.66   | 5.48E-25 |
| TRAC       | 0.368  | 0.547  | 1.039  | 1.497  | 2.403  | 5.50E-25 |
| CEBPG      | 0.502  | -0.094 | -0.147 | 0.141  | -0.065 | 5.56E-25 |
| EXOC4      | 0.49   | 0.016  | -0.018 | 0.511  | 1.027  | 5.68E-25 |
| PPM1M      | -0.436 | -0.143 | 0.35   | 0.197  | 0.453  | 6.09E-25 |
| PSD3       | 0.309  | -0.015 | -0.115 | 0.209  | 0.866  | 6.30E-25 |
| KIF14      | -0.347 | -0.883 | -0.643 | -0.322 | -0.382 | 6.59E-25 |
| SLC35D1    | 0.297  | 0.171  | -0.066 | -0.419 | -0.553 | 7.25E-25 |
| ARPC1B     | 0.203  | -0.081 | -0.107 | 0.133  | 0.439  | 7.28E-25 |
| SNHG15     | -0.37  | -0.162 | -0.191 | -0.944 | -1.189 | 7.54E-25 |
| TBC1D2     | 0.626  | 0.592  | 0.875  | 1.188  | 0.72   | 7.90E-25 |
| REST       | 1.058  | 0.249  | 0.364  | 0.661  | 0.69   | 7.91E-25 |
| TOPBP1     | 0.151  | -0.045 | -0.223 | -0.204 | -0.376 | 8.02E-25 |

|             |        |        |        |        |        |          |
|-------------|--------|--------|--------|--------|--------|----------|
| ULK3        | -0.26  | 0.031  | -0.067 | -0.614 | -0.726 | 8.02E-25 |
| LIMK2       | 0.154  | 0.124  | 0.266  | 0.024  | 0.475  | 8.13E-25 |
| ZNF827      | 0.229  | -0.055 | 0.358  | 0.385  | 0.653  | 8.53E-25 |
| MCM3        | 0.445  | -0.035 | -0.519 | -0.464 | -0.506 | 8.53E-25 |
| TGFBR1      | 0.838  | 0.422  | 0.084  | 0.017  | 0.349  | 8.54E-25 |
| GDE1        | -0.056 | -0.062 | -0.026 | 0.156  | 0.486  | 8.57E-25 |
| EXOC3L2     | 1.195  | -0.159 | -0.253 | 0.059  | -1.092 | 8.58E-25 |
| ABR         | 0.239  | -0.07  | 0.072  | 0.479  | 0.795  | 1.04E-24 |
| SIRT1       | 0.708  | 0.084  | -0.089 | 0.055  | 0.058  | 1.07E-24 |
| ING4        | -0.258 | -0.011 | 0.178  | 0.102  | 0.748  | 1.08E-24 |
| IPPK        | 0.56   | 0.206  | 0.119  | 0.008  | -0.37  | 1.08E-24 |
| ERRFI1      | 0.307  | 0.139  | 0.177  | 0.051  | 0.675  | 1.09E-24 |
| MYO19       | 0.005  | -0.048 | -0.074 | -0.444 | -0.438 | 1.11E-24 |
| CREB5       | 0.057  | 0.277  | 0.297  | 0.52   | 1.584  | 1.15E-24 |
| ATHL1       | -0.406 | 0.083  | 0.055  | -0.937 | -0.9   | 1.16E-24 |
| RP3-399L15. | -0.586 | -0.182 | 0.298  | 0.467  | 1.635  | 1.20E-24 |
| RSPH3       | 0.246  | 0.463  | 0.485  | 0.803  | 1.382  | 1.29E-24 |
| MFHAS1      | 0.868  | 0.084  | 0.148  | 0.225  | 0.65   | 1.38E-24 |
| KLF3        | 0.742  | 0.289  | 0.264  | 0.288  | 0.647  | 1.40E-24 |
| CERCAM      | 0.035  | -0.031 | 0.077  | 0.263  | 0.665  | 1.42E-24 |
| C1orf74     | 0.597  | 0.135  | -0.223 | -0.195 | -0.74  | 1.55E-24 |
| EFHD2       | -0.186 | -0.205 | 0.044  | 0.367  | 0.503  | 1.56E-24 |
| FAM129A     | 0.26   | 0.57   | 0.669  | 1.187  | 1.469  | 1.60E-24 |
| GLRB        | 0.088  | 0.193  | 0.287  | 0.259  | 1.06   | 1.60E-24 |
| LMO4        | 0.153  | -0.429 | -0.482 | -0.259 | -0.469 | 1.63E-24 |
| NUMB        | 0.092  | 0.039  | 0.042  | 0.221  | 0.586  | 1.64E-24 |
| RP11-142E9  | 0.468  | 0.129  | -0.448 | -0.751 | -1.237 | 1.67E-24 |
| SDC2        | 0.275  | -0.05  | -0.423 | -0.335 | -0.891 | 1.76E-24 |
| HMOX1       | 0.681  | 0.397  | 0.486  | 0.897  | 1.125  | 1.78E-24 |
| RAB31       | 0.476  | -0.112 | -0.386 | -0.136 | 0.371  | 1.87E-24 |
| HSF2        | 0.42   | 0.077  | -0.315 | -0.259 | -0.384 | 1.93E-24 |
| MESDC1      | 0.118  | -0.146 | -0.14  | 0.055  | 0.584  | 2.03E-24 |
| APOBEC3B    | 0.041  | 0.346  | 0.545  | 1.108  | 1.076  | 2.08E-24 |
| MTURN       | 0.466  | 0.346  | 0.131  | -0.469 | -0.864 | 2.14E-24 |
| IQCE        | 0.288  | -0.149 | 0.017  | 0.157  | 0.695  | 2.17E-24 |
| RACGAP1     | -0.562 | -0.862 | -0.751 | -0.19  | -0.543 | 2.30E-24 |
| TNFAIP3     | 0.097  | 0.656  | 0.204  | -0.293 | 0.533  | 2.32E-24 |
| ZBTB8A      | 1.181  | 0.172  | 0.122  | 0.19   | 0.376  | 2.34E-24 |

|            |        |        |        |        |        |          |
|------------|--------|--------|--------|--------|--------|----------|
| C14orf80   | -0.018 | -0.05  | -0.066 | -0.187 | -0.915 | 2.48E-24 |
| MRPS27     | 0.097  | -0.063 | 0.087  | 0.278  | 0.391  | 2.51E-24 |
| PCDHGB7    | 0.2    | 0.28   | 0.024  | 0.534  | 1.588  | 2.78E-24 |
| KIAA0556   | -0.318 | -0.032 | 0.23   | 0.079  | 0.459  | 2.78E-24 |
| PLCL2      | 0.525  | 0.696  | 0.534  | 0.673  | 1.406  | 2.84E-24 |
| PLCXD1     | -0.263 | -0.128 | -0.233 | -1.002 | -0.733 | 2.88E-24 |
| ZFP36L2    | -0.183 | 0.393  | 0.014  | -0.018 | 0.7    | 2.91E-24 |
| SFXN3      | -0.222 | -0.193 | 0.044  | 0.031  | 0.359  | 2.93E-24 |
| FNIP2      | 0.645  | 0.057  | -0.035 | 0.08   | -0.069 | 3.01E-24 |
| RP11-22B23 | -0.6   | -0.114 | -0.109 | -1.094 | -1.576 | 3.02E-24 |
| RAD18      | 0.147  | 0.101  | -0.2   | -0.217 | -0.546 | 3.12E-24 |
| MAMDC4     | -0.266 | 0.773  | 1.037  | -0.068 | -0.283 | 3.18E-24 |
| NBR1       | 0.275  | 0.16   | 0.308  | 0.717  | 0.828  | 3.36E-24 |
| TROAP      | -1.432 | -1.086 | -0.705 | -1.037 | -1.062 | 3.44E-24 |
| SLC38A2    | 0.201  | -0.037 | -0.263 | -0.435 | -0.795 | 3.50E-24 |
| NHLRC2     | 0.162  | 0.187  | 0.165  | 0.001  | -0.393 | 3.53E-24 |
| TMEM35     | 0.3    | -0.021 | 0.086  | 0.231  | 1.109  | 3.55E-24 |
| DLGAP4     | 0.203  | 0.176  | 0.345  | 0.562  | 0.959  | 3.55E-24 |
| DNAJB4     | -0.258 | -0.025 | -0.469 | -0.31  | -1.078 | 3.75E-24 |
| MMP11      | -0.026 | -0.142 | -0.091 | -0.092 | 1.352  | 3.78E-24 |
| AGTRAP     | -0.142 | -0.105 | 0.154  | 0.38   | 0.494  | 3.80E-24 |
| BNC2       | -0.035 | 0.028  | 0.118  | 0.315  | 0.6    | 3.89E-24 |
| DSTN       | 0.215  | 0.03   | -0.08  | -0.119 | -0.468 | 3.97E-24 |
| VKORC1L1   | 0.025  | -0.192 | -0.101 | 0.05   | 0.484  | 3.98E-24 |
| CDT1       | 0.617  | 0.004  | -0.305 | -0.336 | -0.293 | 4.08E-24 |
| ADGRG1     | 0.314  | 0.063  | 0.086  | 0.449  | 0.788  | 4.44E-24 |
| SBDSP      | -0.021 | -0.087 | -0.164 | -0.377 | -0.761 | 4.67E-24 |
| B4GAT1     | -0.079 | 0.088  | 0.093  | 0.592  | 0.734  | 4.76E-24 |
| SYNE3      | 0.489  | 0.092  | 0.642  | 0.31   | -0.158 | 5.00E-24 |
| GPX1       | -0.053 | -0.031 | 0.09   | 0.2    | 0.417  | 5.12E-24 |
| DIAPH2     | 0.521  | 0.065  | 0.292  | 0.701  | 0.76   | 5.21E-24 |
| AMIGO2     | 0.762  | 0.633  | 0.335  | 0.067  | 1.026  | 5.30E-24 |
| ANKRD18A   | -0.079 | -0.08  | -0.012 | -0.499 | -1.258 | 5.48E-24 |
| C21orf58   | -1.153 | -0.349 | -0.187 | -0.577 | -0.891 | 5.61E-24 |
| FAM107B    | 0.066  | 0.052  | 0.052  | 0.201  | -0.58  | 5.66E-24 |
| DBF4       | -0.809 | -0.754 | -0.654 | -0.706 | -1.007 | 5.67E-24 |
| RABL2B     | -0.28  | 0.184  | 0.55   | 0.291  | 0.671  | 5.75E-24 |
| FOXF1      | 0.599  | 0.296  | 0.475  | 0.859  | 1.731  | 5.87E-24 |

|             |        |        |        |        |        |          |
|-------------|--------|--------|--------|--------|--------|----------|
| KLF4        | 1.329  | 0.253  | 0.052  | 0.057  | 0.149  | 5.88E-24 |
| KCNJ2       | 1.253  | 0.974  | 1.622  | 1.421  | 1.33   | 6.59E-24 |
| ST3GAL1     | 0.592  | -0.068 | 0.047  | 0.091  | -0.183 | 6.67E-24 |
| RHOJ        | -0.234 | -0.187 | 0.01   | -0.161 | 0.472  | 7.00E-24 |
| ZNF704      | 0.537  | -0.07  | -0.141 | -0.212 | -0.468 | 7.29E-24 |
| C3orf58     | 0.266  | 0.02   | -0.346 | -0.3   | -0.352 | 7.46E-24 |
| GMPPB       | 0.096  | -0.002 | 0.017  | 0      | -0.608 | 7.96E-24 |
| MANSC1      | -0.043 | -0.023 | 0.069  | 0.464  | 0.543  | 8.01E-24 |
| PM20D2      | 0.058  | 0.308  | 0.353  | 0.46   | 0.799  | 8.29E-24 |
| TFDP2       | 0.182  | 0.011  | -0.198 | 0.043  | 0.655  | 8.41E-24 |
| ZBTB38      | 0.33   | 0.259  | 0.41   | 0.743  | 0.834  | 8.61E-24 |
| RP4-794I6.4 | 0.735  | 1.217  | 1.446  | 1.092  | 1.279  | 8.67E-24 |
| MAP3K3      | 0.095  | -0.101 | 0.046  | 0.21   | 0.546  | 8.83E-24 |
| C1RL        | -0.094 | 0.079  | 0.273  | 0.58   | 0.744  | 8.97E-24 |
| CRTAC1      | 0.187  | 0.114  | 0.493  | 0.649  | 1.941  | 9.62E-24 |
| TMEM248     | 0.251  | 0.059  | -0.036 | 0.261  | 0.544  | 9.65E-24 |
| LRRC4       | 0.88   | -0.734 | -1.215 | -1.267 | -1.871 | 9.66E-24 |
| ASPH        | 0.141  | -0.056 | -0.13  | 0.13   | 0.469  | 9.87E-24 |
| HLX         | 0.211  | 0.548  | -0.217 | 0.054  | 1.107  | 1.02E-23 |
| STIL        | -0.09  | -0.393 | -0.449 | -0.292 | -0.71  | 1.04E-23 |
| CH17-472G2  | -1.201 | -0.063 | 0.108  | -0.774 | 0.299  | 1.09E-23 |
| FAM213A     | -0.053 | -0.092 | 0.099  | 0.314  | 0.648  | 1.13E-23 |
| COG5        | 0.266  | 0.064  | 0.138  | 0.397  | 0.619  | 1.25E-23 |
| PLVAP       | 0.296  | -0.07  | -0.275 | 0.245  | -1.466 | 1.26E-23 |
| PRDM15      | -0.77  | 0.311  | 0.241  | -0.239 | -0.347 | 1.35E-23 |
| RNF19A      | 0.549  | 0.169  | 0.199  | 0.173  | 0.554  | 1.36E-23 |
| MSRA        | 0.101  | 0.116  | 0.108  | 0.489  | 0.959  | 1.38E-23 |
| CARD11      | 0.217  | -0.074 | -0.078 | 0.261  | 0.76   | 1.41E-23 |
| XRCC2       | 0.249  | -0.028 | -0.37  | -0.787 | -0.903 | 1.45E-23 |
| SP100       | 0.152  | 0.021  | 0.064  | 0.264  | 0.497  | 1.48E-23 |
| TMEM164     | 0.482  | 0.114  | -0.228 | -0.259 | -0.553 | 1.57E-23 |
| TBC1D8      | 0.192  | 0.089  | 0.17   | -0.275 | -0.545 | 1.61E-23 |
| HLA-A       | 0.24   | 0.136  | 0.034  | 0.398  | 0.799  | 1.65E-23 |
| CPNE3       | 0.27   | 0.114  | 0.149  | 0.585  | 0.83   | 1.70E-23 |
| TLR4        | 0.157  | -0.181 | -0.468 | -0.378 | -0.612 | 1.72E-23 |
| SULF1       | -0.15  | 0.033  | -0.016 | 0.324  | -1.044 | 1.76E-23 |
| RINL        | -0.078 | 0.159  | 0.741  | 1.032  | 0.969  | 1.78E-23 |
| ZNF692      | -1.151 | -0.08  | 0.164  | -0.886 | -0.686 | 1.83E-23 |

|           |        |        |        |        |        |          |
|-----------|--------|--------|--------|--------|--------|----------|
| ZBTB48    | -0.799 | -0.01  | 0.002  | -0.569 | -0.687 | 1.97E-23 |
| TAB2      | 0.378  | 0.408  | 0.285  | 0.466  | 0.739  | 1.98E-23 |
| ATG4D     | 0.082  | 0.236  | -0.123 | -0.308 | -0.556 | 2.03E-23 |
| NFKBIE    | 0.458  | 0.669  | 0.246  | 0.033  | 0.738  | 2.05E-23 |
| FLOT1     | 0.105  | -0.185 | -0.282 | -0.086 | -0.617 | 2.05E-23 |
| HIVEP1    | 0.564  | 0.825  | 0.501  | 0.224  | 0.283  | 2.10E-23 |
| HDAC9     | -0.055 | 0.766  | 0.563  | 0.599  | 0.986  | 2.11E-23 |
| VWA5A     | -0.256 | -0.241 | 0.024  | 0.26   | 0.948  | 2.11E-23 |
| CALHM2    | 0.341  | -0.386 | -0.279 | -0.03  | -0.514 | 2.14E-23 |
| MPZL1     | 0.11   | -0.057 | -0.23  | -0.024 | 0.409  | 2.17E-23 |
| GRINA     | 0.067  | 0.029  | -0.011 | 0.261  | 0.763  | 2.29E-23 |
| PPARA     | -0.36  | 0.142  | 0.311  | 0.31   | 0.844  | 2.44E-23 |
| PRPF40B   | -0.584 | -0.169 | -0.165 | -0.518 | -1.36  | 2.47E-23 |
| FHL3      | 0.098  | 0.038  | 0.171  | 0.268  | 0.725  | 2.49E-23 |
| SPATA7    | -0.476 | 0.183  | 0.009  | -0.224 | -0.713 | 2.50E-23 |
| HPCAL1    | 0.226  | -0.166 | -0.208 | 0.248  | 0.436  | 2.58E-23 |
| SDCBP2    | 0.136  | -0.047 | 0.167  | 0.403  | 1.239  | 2.67E-23 |
| GM2A      | 0.218  | 0.099  | 0.129  | 0.554  | 0.69   | 2.73E-23 |
| ELMO3     | -0.041 | -0.156 | -0.098 | -1.035 | -1.227 | 2.77E-23 |
| SLITRK4   | -0.183 | 0.006  | 0.029  | 0.066  | 0.749  | 2.78E-23 |
| HEY1      | 1.199  | -0.237 | -0.721 | -0.516 | -0.154 | 2.78E-23 |
| PRKAB1    | -0.011 | 0.218  | 0.477  | 0.387  | 0.828  | 2.81E-23 |
| VAPA      | 0.162  | -0.184 | -0.284 | -0.197 | -0.327 | 3.03E-23 |
| ADAMTS18  | -0.388 | -0.065 | 0.617  | 0.693  | 2.15   | 3.17E-23 |
| RBM38     | 0.335  | 0.36   | 0.354  | 0.428  | 0.928  | 3.28E-23 |
| MMP16     | 0.051  | -0.239 | -0.466 | -0.527 | -0.617 | 3.28E-23 |
| DNASE1L1  | 0.046  | -0.091 | 0.006  | 0.256  | 0.538  | 3.36E-23 |
| TIMM10    | -0.437 | -0.506 | -0.459 | -0.626 | -1.018 | 3.44E-23 |
| EDEM1     | 0.262  | 0.103  | 0.093  | 0.07   | 0.527  | 3.56E-23 |
| TAF1C     | -0.332 | -0.148 | -0.224 | -0.937 | -0.977 | 3.57E-23 |
| PWWP2A    | 0.093  | 0.116  | 0.109  | 0.327  | 0.728  | 3.96E-23 |
| HMG2P5    | -0.05  | -0.177 | -0.06  | -0.052 | -0.799 | 4.01E-23 |
| VOPP1     | 0.116  | 0.024  | -0.022 | 0.239  | 0.54   | 4.06E-23 |
| AES       | 0.056  | -0.07  | -0.048 | 0.091  | 0.414  | 4.27E-23 |
| GCLM      | 0.324  | 0.135  | -0.109 | 0.046  | -0.675 | 4.29E-23 |
| ABCB6     | -0.359 | 0.263  | 0.276  | 0.205  | -0.934 | 4.29E-23 |
| EGR1      | -0.777 | -0.185 | -1.158 | -1.788 | -1.733 | 4.54E-23 |
| HNRPA1L-2 | 0.251  | 0.458  | 0.373  | 0.81   | 0.67   | 4.62E-23 |



|         |        |        |        |        |        |          |
|---------|--------|--------|--------|--------|--------|----------|
| PRDM1   | 0.43   | 0.761  | 0.415  | 0.06   | 1.151  | 4.89E-23 |
| AHNAK2  | -0.195 | -0.216 | 0.52   | 0.31   | 0.673  | 4.99E-23 |
| DCP1A   | 0.468  | 0.085  | -0.059 | -0.161 | -0.186 | 5.01E-23 |
| BCAT1   | 0.326  | -0.256 | -0.379 | -0.093 | 0.268  | 5.06E-23 |
| FAM193B | -0.69  | 0.048  | -0.025 | -0.904 | -0.801 | 5.19E-23 |
| DPYSL3  | 0.571  | 0.037  | -0.382 | -0.339 | -0.649 | 5.30E-23 |
| NUDT4   | -0.08  | -0.082 | -0.513 | -0.459 | -0.064 | 5.77E-23 |
| PLEKHJ1 | -0.634 | -0.342 | -0.42  | -0.747 | -0.69  | 5.77E-23 |
| CHST11  | 0.331  | -0.166 | -0.251 | -0.037 | 0.639  | 5.87E-23 |
| KRT7    | 0.655  | 0.023  | -0.243 | 0.074  | 0.971  | 5.88E-23 |
| TNFSF10 | -0.457 | -0.028 | 0.174  | 0.223  | 2.081  | 5.95E-23 |
| NOL6    | 0.15   | -0.011 | -0.103 | -0.175 | -0.678 | 5.95E-23 |
| FAM63A  | -0.308 | 0.132  | 0.447  | 0.6    | 0.581  | 6.28E-23 |
| SLFN11  | 0.103  | -0.247 | -0.182 | -0.32  | -0.49  | 6.67E-23 |
| STK11IP | 0.115  | 0.088  | -0.003 | -0.177 | -0.753 | 6.68E-23 |
| SNX5    | 0.035  | 0.072  | -0.051 | -0.137 | -0.372 | 6.81E-23 |
| TTC3    | 0.089  | 0.072  | 0.07   | -0.027 | 0.385  | 7.28E-23 |
| CXCL1   | 0.05   | 0.265  | -0.182 | -0.633 | -0.194 | 7.34E-23 |
| ZNRF1   | 0.234  | 0.301  | 0.16   | 0.267  | 0.78   | 7.48E-23 |
| PTPN14  | 0.185  | 0.03   | 0.122  | 0.289  | 0.681  | 7.69E-23 |
| CENPO   | 0.039  | -0.297 | -0.427 | -0.331 | -0.595 | 7.86E-23 |
| SHB     | 0.683  | -0.082 | 0.048  | 0.45   | 0.779  | 7.97E-23 |
| CCDC112 | 0.056  | 0.045  | 0.179  | 0.422  | 0.976  | 8.16E-23 |
| FNDC3B  | 0.392  | 0.051  | 0.177  | 0.422  | 0.824  | 8.38E-23 |
| SEMA4C  | -0.572 | -0.055 | -0.489 | -0.584 | -0.835 | 8.82E-23 |
| ANKRD11 | 0.124  | -0.026 | 0.153  | 0.167  | 0.427  | 9.04E-23 |
| PMP22   | 0.273  | -0.246 | -0.411 | -0.187 | -0.308 | 9.25E-23 |
| SLC30A7 | 0.122  | 0.347  | 0.061  | -0.185 | -0.299 | 9.34E-23 |
| PARVB   | 0.282  | -0.006 | 0.022  | 0.379  | 0.714  | 1.02E-22 |
| RPS6KA2 | 0.248  | -0.044 | -0.154 | 0.13   | 0.523  | 1.05E-22 |
| SREBF2  | 0.304  | -0.072 | -0.337 | -0.38  | 0.162  | 1.08E-22 |
| GMDS    | 0.515  | 0.202  | 0.094  | 0.575  | 0.86   | 1.15E-22 |
| UBA6    | 0.104  | 0.226  | 0.272  | 0.375  | 0.591  | 1.16E-22 |
| ANK3    | 0.327  | -0.149 | 0.201  | 0.63   | 0.888  | 1.21E-22 |
| PLK4    | -0.164 | -0.31  | -0.24  | -0.328 | -0.873 | 1.25E-22 |
| KLHL4   | 0.297  | -0.14  | -0.597 | -0.565 | 0.098  | 1.26E-22 |
| KIF2C   | -0.606 | -0.824 | -0.687 | -0.305 | -0.517 | 1.27E-22 |
| BEND3   | 0.923  | 0.056  | -0.311 | -0.192 | 0.644  | 1.39E-22 |

|            |        |        |        |        |        |          |
|------------|--------|--------|--------|--------|--------|----------|
| CRYL1      | 0.231  | -0.175 | -0.221 | 0.097  | 0.546  | 1.39E-22 |
| ELMSAN1    | -0.454 | -0.169 | 0.139  | 0.076  | 0.185  | 1.39E-22 |
| ELL2       | 0.458  | 0.415  | 0.159  | 0.193  | 0.535  | 1.42E-22 |
| KIAA0922   | -0.094 | -0.103 | 0.008  | 0.157  | 0.842  | 1.43E-22 |
| IQCC       | -0.412 | -0.131 | -0.701 | -0.657 | -1.428 | 1.45E-22 |
| PTTG1      | -0.427 | -0.578 | -0.465 | -0.255 | 0.147  | 1.50E-22 |
| ZMYM2      | 0.124  | 0.018  | -0.067 | 0.038  | 0.56   | 1.54E-22 |
| SUV39H1    | -0.119 | -0.24  | -0.398 | -0.133 | -0.825 | 1.59E-22 |
| SKI        | 0.779  | 0.02   | 0.032  | 0.209  | 0.326  | 1.67E-22 |
| ZNF512     | -0.588 | -0.128 | 0.077  | -0.034 | 0.15   | 1.68E-22 |
| BTBD10     | 0.042  | 0.177  | 0.167  | 0.437  | 0.49   | 1.75E-22 |
| CEP95      | -0.139 | 0.248  | 0.223  | -0.438 | -0.628 | 1.80E-22 |
| DIXDC1     | 0.385  | -0.359 | -0.584 | -0.272 | -0.682 | 1.80E-22 |
| ELP2       | 0.096  | 0.072  | 0.14   | 0.327  | 0.525  | 1.95E-22 |
| MIPOL1     | 0.131  | -0.148 | -0.133 | -0.338 | -0.658 | 1.97E-22 |
| SLC25A28   | -0.004 | 0.046  | -0.081 | -0.503 | -0.9   | 1.98E-22 |
| HMOX2      | 0.302  | -0.145 | -0.1   | 0.361  | 0.658  | 2.05E-22 |
| MZF1       | -0.592 | 0.268  | 0.598  | -0.096 | -0.205 | 2.08E-22 |
| TMEM38B    | -0.144 | -0.009 | -0.121 | -0.563 | -1.235 | 2.08E-22 |
| EBI3       | -0.021 | 0.987  | 0.849  | 1.106  | 1.859  | 2.13E-22 |
| GPD2       | 0.236  | 0.007  | -0.218 | -0.174 | -0.571 | 2.22E-22 |
| ZNF79      | 0.916  | 0.904  | 0.852  | 0.288  | 0.593  | 2.32E-22 |
| UAP1       | 0.354  | -0.129 | -0.04  | 0.329  | 0.309  | 2.33E-22 |
| ALS2CL     | -0.578 | 0.049  | 0.79   | 0.267  | -0.055 | 2.34E-22 |
| LRRC58     | 0.482  | 0.093  | -0.172 | -0.021 | -0.286 | 2.36E-22 |
| RNF138     | 0.154  | -0.123 | -0.331 | -0.474 | -0.388 | 2.40E-22 |
| RPS6KL1    | -0.524 | 0.079  | 0.572  | 0.157  | 0.433  | 2.42E-22 |
| PAPLN      | -0.637 | 0.344  | 0.739  | 0.154  | 0.54   | 2.45E-22 |
| RFWD3      | 0.192  | -0.204 | -0.35  | -0.306 | -0.508 | 2.45E-22 |
| AC116366.4 | -0.484 | 0.165  | 0.753  | -0.039 | 1.366  | 2.53E-22 |
| CCIN       | 0.231  | 0.071  | -0.051 | 0.56   | 1.266  | 2.55E-22 |
| RP11-295D4 | -0.791 | -0.166 | -0.119 | -1.341 | -1.215 | 2.60E-22 |
| PLCL1      | -0.328 | -0.002 | -0.897 | -0.49  | -0.63  | 2.66E-22 |
| SLC15A3    | -0.048 | 0.262  | 0.319  | 0.746  | 1.613  | 2.80E-22 |
| TINAGL1    | 0.317  | 0.074  | -0.059 | 0.143  | -0.402 | 2.85E-22 |
| YRDC       | 0.205  | -0.155 | -0.342 | -0.39  | -0.595 | 2.91E-22 |
| NASP       | 0.31   | 0.156  | -0.118 | -0.144 | -0.504 | 2.92E-22 |
| LRRC20     | -0.051 | -0.356 | -0.056 | 0.423  | 1.003  | 2.99E-22 |

|             |        |        |        |        |        |          |
|-------------|--------|--------|--------|--------|--------|----------|
| SOGA1       | -0.421 | -0.301 | -0.193 | -0.114 | 0.362  | 3.09E-22 |
| ZNF121      | -0.066 | 0.279  | 0.173  | -0.697 | -0.578 | 3.10E-22 |
| RP11-504P2  | -1.09  | 0.171  | 0.581  | -0.38  | -0.511 | 3.22E-22 |
| CCP110      | 0.032  | 0.054  | -0.055 | -0.117 | -0.611 | 3.48E-22 |
| APMAP       | 0.175  | 0.073  | 0.02   | 0.354  | 0.549  | 3.56E-22 |
| LYST        | -0.789 | 0.064  | 0.201  | -0.07  | 0.22   | 3.56E-22 |
| WDR59       | -0.176 | 0.217  | 0.365  | 0.14   | 0.371  | 3.67E-22 |
| RAB11FIP5   | -0.055 | -0.026 | 0.179  | 0.37   | 0.615  | 3.72E-22 |
| KSR1        | -0.514 | -0.079 | 0.336  | 0.155  | 0.294  | 3.90E-22 |
| TDRD10      | 0.247  | 0.056  | -0.101 | -0.609 | -1.201 | 3.95E-22 |
| RP11-363E7  | 0.559  | 1.142  | 1.11   | 0.591  | 1.112  | 3.97E-22 |
| AK1         | 0.18   | 0.128  | 0.269  | 0.569  | 0.859  | 4.14E-22 |
| NCEH1       | 0.024  | 0.2    | 0.214  | 0.513  | 0.628  | 4.20E-22 |
| UGT2A1      | -0.147 | -0.036 | -0.392 | -0.284 | -1.689 | 4.50E-22 |
| PLEKHA1     | 0.097  | 0.335  | 0.237  | 0.118  | 0.613  | 4.51E-22 |
| HMGXB4      | 0.496  | 0.021  | -0.081 | -0.067 | -0.119 | 4.62E-22 |
| WASH3P      | -0.47  | 0.153  | 0.244  | -0.572 | -0.734 | 4.83E-22 |
| SHROOM3     | 0.664  | 0.15   | 0.655  | 0.891  | 0.976  | 4.94E-22 |
| KMT2B       | -0.324 | -0.067 | -0.125 | -0.674 | -0.597 | 5.00E-22 |
| LAPTM4A     | 0.119  | -0.089 | -0.083 | 0.187  | 0.402  | 5.11E-22 |
| ZKSCAN1     | -0.118 | 0.283  | 0.238  | 0.124  | 0.483  | 5.34E-22 |
| CDKN2D      | -0.131 | -0.501 | -0.056 | 0.151  | -1.294 | 5.42E-22 |
| PAIP1       | 0.12   | 0.007  | -0.175 | 0.093  | 0.597  | 5.52E-22 |
| ST3GAL4     | -0.171 | -0.219 | -0.024 | -0.198 | 0.443  | 5.63E-22 |
| PVR         | 0.335  | 0.255  | 0.239  | 0.328  | 0.572  | 5.69E-22 |
| TNFRSF10D   | 0.516  | 0.476  | 0.235  | 0.338  | -0.285 | 5.76E-22 |
| RP11-334L9. | 0.358  | -0.274 | -0.362 | -0.125 | -0.712 | 6.07E-22 |
| PRPSAP1     | -0.105 | -0.098 | -0.006 | 0.244  | 0.46   | 6.09E-22 |
| RP11-245J9. | 0.529  | 0.446  | 0.418  | -1.049 | -1.163 | 6.24E-22 |
| GBP2        | 0.546  | 0.259  | 0.091  | 0.46   | 1.89   | 6.40E-22 |
| FSTL3       | 0.62   | 0.269  | 0.345  | 0.394  | 0.45   | 6.46E-22 |
| GREM1       | 0.331  | 0.127  | -0.251 | -0.248 | 0.729  | 6.53E-22 |
| HACD2       | 0.068  | 0      | -0.228 | -0.217 | -0.579 | 6.56E-22 |
| DHRS3       | 0.279  | -0.049 | -0.07  | 0.182  | 1.121  | 6.70E-22 |
| STAU2       | 0.026  | 0.104  | 0.228  | 0.517  | 0.726  | 7.31E-22 |
| CXXC1       | -0.194 | -0.112 | -0.155 | -0.317 | -0.651 | 8.08E-22 |
| FSCN1       | 0.299  | -0.065 | -0.138 | 0.295  | 0.947  | 8.12E-22 |
| KDR         | 0.353  | -0.13  | -0.06  | 0.181  | 0.544  | 8.26E-22 |

|            |        |        |        |        |        |          |
|------------|--------|--------|--------|--------|--------|----------|
| FBXO22     | 0.427  | 0.686  | 0.822  | 0.456  | 0.648  | 8.34E-22 |
| NDFIP1     | 0.064  | -0.036 | -0.076 | 0.086  | 0.454  | 8.40E-22 |
| HYLS1      | -0.927 | -0.851 | -0.667 | -0.322 | -0.246 | 8.55E-22 |
| PCTP       | 0.112  | -0.21  | -0.528 | -0.497 | -1.004 | 8.65E-22 |
| DLC1       | 0.711  | 0.301  | 0.355  | 0.493  | 0.678  | 8.84E-22 |
| FTX        | -0.364 | 0.177  | 0.152  | -0.597 | -0.557 | 9.06E-22 |
| RAD52      | -0.9   | 0.006  | 0.162  | -0.537 | -0.59  | 9.19E-22 |
| CDK19      | -0.188 | 0.251  | 0.308  | 0.414  | 0.783  | 9.24E-22 |
| SNX7       | 0.042  | 0.091  | 0.135  | 0.416  | 0.595  | 9.29E-22 |
| HSDL2      | 0.343  | 0.335  | 0.439  | 0.689  | 0.766  | 9.34E-22 |
| CLDN15     | -0.507 | -0.035 | 0.408  | -0.566 | -0.745 | 9.81E-22 |
| RP11-181C3 | -0.546 | -0.526 | -0.387 | -0.499 | -1.825 | 9.93E-22 |
| EFHC1      | -0.527 | -0.087 | 0.485  | -0.037 | 0.835  | 1.00E-21 |
| ZFAND2B    | -0.079 | -0.09  | -0.207 | -0.382 | -0.781 | 1.00E-21 |
| C8orf33    | 0.17   | 0.031  | -0.14  | -0.206 | -0.385 | 1.03E-21 |
| TCF4       | 0.397  | 0.103  | -0.019 | 0.015  | 0.535  | 1.08E-21 |
| ASPHD2     | -0.288 | -0.138 | 0.019  | 0.266  | 0.748  | 1.12E-21 |
| TBL1X      | 0.155  | -0.189 | -0.058 | 0.27   | 0.709  | 1.14E-21 |
| CEP68      | -0.122 | -0.008 | 0.063  | 0.133  | 0.631  | 1.17E-21 |
| ANKRD18B   | 0.212  | 0.012  | -0.235 | -0.313 | -1.149 | 1.17E-21 |
| EIF2S3     | 0.202  | 0.257  | 0.291  | 0.319  | 0.446  | 1.18E-21 |
| POLL       | -0.497 | 0.199  | 0.186  | -0.212 | -0.334 | 1.20E-21 |
| IQCK       | 0.007  | 0.268  | 0.495  | 0.387  | 1.287  | 1.30E-21 |
| PCMTD1     | 0.148  | 0.306  | 0.294  | 0.134  | 0.747  | 1.30E-21 |
| CARD8      | -0.6   | -0.225 | 0.28   | -0.075 | 0.093  | 1.33E-21 |
| NUP35      | -0.182 | -0.414 | -0.583 | -0.324 | -0.868 | 1.40E-21 |
| RAB5B      | 0.122  | 0.039  | 0.143  | 0.254  | 0.613  | 1.41E-21 |
| GLIPR2     | 0.279  | 0.13   | 0.022  | 0.077  | 0.705  | 1.43E-21 |
| MIR22HG    | -0.155 | 0.097  | -0.061 | -0.969 | -0.886 | 1.43E-21 |
| RBL1       | 0.429  | 0.244  | 0.032  | 0.082  | -0.307 | 1.45E-21 |
| MPG        | -0.102 | -0.151 | -0.058 | 0.151  | 0.499  | 1.46E-21 |
| HDAC6      | -0.185 | 0.072  | 0.207  | -0.041 | -0.596 | 1.46E-21 |
| CACHD1     | 0.158  | -0.094 | -0.647 | -0.589 | -0.74  | 1.46E-21 |
| ALDH2      | 0.196  | 0.12   | 0.003  | 0.41   | 0.772  | 1.57E-21 |
| AC002480.6 | 0.116  | 0.235  | 0.285  | 0.398  | 0.616  | 1.59E-21 |
| EVC        | -0.189 | -0.147 | 0.125  | -0.036 | 0.561  | 1.59E-21 |
| PPM1A      | 0.558  | 0.34   | 0.156  | 0.238  | 0.383  | 1.59E-21 |
| SNHG12     | -0.081 | 0.113  | 0.097  | -0.971 | -1.125 | 1.59E-21 |

|            |        |        |        |        |        |          |
|------------|--------|--------|--------|--------|--------|----------|
| SKA3       | -0.468 | -0.413 | -0.156 | -0.045 | -0.724 | 1.63E-21 |
| ST6GALNAC  | 0.006  | -0.116 | -0.278 | -0.322 | -0.662 | 1.68E-21 |
| MFSD2A     | -0.369 | -0.355 | -0.825 | -0.959 | -1.121 | 1.72E-21 |
| TRIM25     | 0.067  | 0.016  | 0.044  | 0.321  | 0.584  | 1.74E-21 |
| JUND       | 0.272  | 0.199  | 0.034  | 0.208  | 0.964  | 1.77E-21 |
| CKAP2      | -0.454 | -0.631 | -0.476 | -0.006 | -0.02  | 1.77E-21 |
| CPEB2      | 0.548  | 0.384  | 0.114  | -0.098 | 0.072  | 1.79E-21 |
| CUL9       | -0.643 | -0.087 | 0.156  | -0.407 | -0.477 | 1.79E-21 |
| STAG3L5P-F | -0.802 | 0.001  | 0.159  | -0.909 | -0.928 | 1.86E-21 |
| IFIT3      | 1.107  | 0.061  | 0.436  | 1.181  | 1.64   | 1.91E-21 |
| KAT7       | 0.126  | -0.079 | -0.334 | -0.224 | -0.8   | 1.91E-21 |
| UBXN2B     | -0.338 | 0.02   | 0.233  | 0.379  | 0.771  | 1.95E-21 |
| ECE1       | 0.27   | 0.083  | 0.039  | 0.477  | 0.903  | 1.98E-21 |
| CREG1      | 0.159  | 0.229  | 0.128  | 0.394  | 0.824  | 2.06E-21 |
| MPHOSPH9   | -0.362 | -0.231 | -0.094 | -0.211 | -0.724 | 2.11E-21 |
| HOXD1      | 0.183  | 0.438  | -0.053 | -0.094 | -0.635 | 2.20E-21 |
| POP5       | -0.252 | -0.128 | -0.201 | -0.235 | -0.946 | 2.25E-21 |
| TUBGCP6    | -0.634 | 0.079  | 0.198  | -0.648 | -0.763 | 2.28E-21 |
| RILPL1     | -0.102 | -0.272 | 0.107  | 0.178  | 0.545  | 2.32E-21 |
| AP001053.1 | -0.469 | 0.278  | 1.061  | 0.974  | 1.37   | 2.47E-21 |
| TMEM79     | -0.699 | 0.064  | -0.106 | -0.696 | -0.832 | 2.53E-21 |
| CSRNP2     | 0.369  | 0.18   | -0.119 | -0.122 | 0.242  | 2.55E-21 |
| DENND4B    | -0.418 | -0.193 | -0.047 | -0.48  | -0.618 | 2.63E-21 |
| RAI2       | 0.502  | 0.022  | -0.307 | -0.325 | -0.744 | 2.75E-21 |
| CREM       | -0.092 | 0.319  | 0.62   | 0.592  | 0.69   | 2.83E-21 |
| MBNL1-AS1  | -0.425 | -0.515 | -0.476 | -0.848 | -1.533 | 2.83E-21 |
| MAGEH1     | 0.153  | -0.101 | -0.293 | -0.095 | -0.649 | 2.89E-21 |
| FAM167A    | 0.49   | 0.272  | 0.868  | 1.615  | 0.866  | 2.91E-21 |
| CDK14      | 0.445  | -0.141 | -0.264 | -0.275 | -0.082 | 2.93E-21 |
| TNFAIP2    | 0.053  | 0.436  | 0.267  | -0.212 | 0.44   | 2.96E-21 |
| PSME1      | 0.123  | 0.09   | 0.18   | 0.236  | 0.59   | 3.02E-21 |
| LHFPL2     | 0.529  | 0.015  | -0.316 | -0.297 | 0.325  | 3.05E-21 |
| CYBA       | -0.107 | -0.145 | -0.104 | -0.043 | 0.456  | 3.07E-21 |
| TJP1       | 0.473  | 0.12   | 0.249  | 0.472  | 0.719  | 3.23E-21 |
| TACC3      | -0.378 | -0.644 | -0.525 | -0.318 | -0.699 | 3.66E-21 |
| SPOCK1     | 0.332  | 0.159  | -0.02  | 0.379  | 0.801  | 3.76E-21 |
| SLC22A23   | 0.364  | 0.661  | 1.375  | 1.269  | 0.883  | 3.85E-21 |
| ILVBL      | -0.116 | -0.121 | -0.295 | -0.141 | -0.721 | 3.88E-21 |

|          |        |        |        |        |        |          |
|----------|--------|--------|--------|--------|--------|----------|
| DOPEY2   | 0.074  | 0.317  | 0.474  | 0.822  | 1.071  | 4.12E-21 |
| CLIC4    | 0.434  | 0.11   | -0.121 | 0.073  | 0.515  | 4.24E-21 |
| ATAD3B   | -0.179 | 0.002  | -0.231 | -0.739 | -0.666 | 4.24E-21 |
| LIN54    | 0.41   | 0.053  | -0.195 | -0.052 | -0.295 | 4.47E-21 |
| CD47     | -0.264 | -0.037 | 0.17   | 0.201  | 0.642  | 4.48E-21 |
| NR5A2    | -0.879 | -0.122 | -0.765 | -0.587 | -0.643 | 4.51E-21 |
| ARMC10   | -0.125 | -0.118 | -0.001 | -0.038 | 0.609  | 4.64E-21 |
| RELT     | 0.084  | -0.032 | -0.365 | -0.883 | -0.491 | 4.88E-21 |
| SNX19    | 0.005  | 0.024  | 0.109  | 0.309  | 0.406  | 5.07E-21 |
| TMEM175  | -0.306 | 0.013  | 0.023  | -0.248 | -0.803 | 5.07E-21 |
| C1orf21  | 0.29   | 0.073  | -0.188 | 0.149  | 0.917  | 5.15E-21 |
| APLF     | -0.173 | 0.825  | 1.102  | 0.951  | 1.11   | 5.33E-21 |
| HNRNPC   | 0.443  | 0.146  | -0.013 | 0.325  | 0.662  | 5.42E-21 |
| PLEKHA2  | 0.714  | 0.001  | -0.004 | 0.315  | 0.289  | 5.54E-21 |
| ALDH1A1  | 0.125  | 0.056  | -0.023 | 0.54   | -0.718 | 5.56E-21 |
| NAV3     | 0.08   | 0.06   | -0.501 | -0.355 | 0.037  | 5.57E-21 |
| SLC4A11  | -0.154 | 0.532  | 0.478  | -0.225 | 0.414  | 5.71E-21 |
| FBLIM1   | 0.294  | -0.212 | -0.046 | 0.294  | 0.385  | 5.87E-21 |
| VLDLR    | 0.549  | 0.269  | -0.184 | 0.268  | 1.224  | 5.93E-21 |
| C9orf114 | -0.384 | -0.118 | -0.184 | -0.397 | -0.678 | 5.98E-21 |
| MALL     | 0.395  | -0.206 | -0.424 | -0.171 | -0.635 | 6.06E-21 |
| CDR2     | -0.044 | -0.2   | -0.214 | 0.087  | 0.463  | 6.28E-21 |
| SLC35E2B | -0.431 | -0.018 | 0.125  | -0.077 | 0.257  | 6.28E-21 |
| KISS1    | -0.318 | 0.002  | 0.247  | 1.108  | 1.859  | 6.29E-21 |
| EPS8     | 0.287  | 0.339  | -0.004 | 0.023  | -0.722 | 6.32E-21 |
| IL27RA   | 0.196  | 0.063  | 0.032  | 0.472  | 0.769  | 6.41E-21 |
| RHPN1    | -1.097 | -0.37  | 0.388  | -0.055 | 0.773  | 6.46E-21 |
| ID3      | -0.221 | -0.391 | -0.401 | -0.179 | -1.209 | 6.46E-21 |
| TJAP1    | -0.223 | 0.301  | 0.102  | -0.385 | -0.421 | 6.48E-21 |
| ZBTB18   | -0.622 | -0.151 | -0.087 | -0.245 | -0.422 | 7.00E-21 |
| C2CD2L   | -0.26  | -0.032 | -0.126 | -0.449 | -0.556 | 7.15E-21 |
| KLHL21   | 0.527  | 0.294  | 0.271  | 0.285  | 0.6    | 7.46E-21 |
| HECTD2   | -0.054 | 0.118  | 0.003  | -0.539 | -0.747 | 7.55E-21 |
| TSPAN3   | 0.194  | -0.025 | -0.13  | 0.138  | 0.361  | 7.56E-21 |
| POLH     | 0.533  | 0.628  | 0.621  | 0.578  | 0.553  | 7.70E-21 |
| PXN      | 0.16   | -0.18  | 0.034  | 0.196  | 0.461  | 7.83E-21 |
| CASP6    | 0.081  | -0.071 | -0.07  | 0.248  | 0.687  | 7.84E-21 |
| TMEM237  | -0.198 | -0.13  | 0.016  | 0.033  | 0.653  | 7.95E-21 |

|            |        |        |        |        |        |          |
|------------|--------|--------|--------|--------|--------|----------|
| LINC00205  | -0.439 | 0.04   | 0.333  | 0.073  | 0.221  | 8.03E-21 |
| FAM73B     | -0.478 | 0.085  | -0.129 | -0.653 | -0.684 | 8.45E-21 |
| COL5A2     | 0.165  | 0.155  | 0.097  | 0.521  | 0.914  | 8.48E-21 |
| EEF1A1     | 0.11   | 0.109  | 0.195  | 0.261  | 0.502  | 8.48E-21 |
| BCAR3      | -0.206 | -0.11  | -0.062 | 0.265  | 0.516  | 8.59E-21 |
| GRB10      | 0.399  | -0.194 | -0.386 | -0.126 | 0.198  | 8.59E-21 |
| PCDH9      | -0.139 | -0.191 | -0.977 | -0.716 | -0.725 | 8.72E-21 |
| NMNAT1     | -0.27  | 0.047  | 0.277  | 0.421  | 0.456  | 8.74E-21 |
| CNKSR3     | 0.523  | 0.712  | -0.058 | -0.116 | 0.63   | 8.75E-21 |
| ARG2       | -0.304 | -0.034 | 0.276  | 0.522  | 0.878  | 9.01E-21 |
| RELL1      | -0.087 | 0.183  | 0.182  | 0.173  | 0.658  | 9.07E-21 |
| ABLIM3     | 0.009  | -0.126 | 0.273  | 0.214  | 0.556  | 9.35E-21 |
| CAB39      | 0.334  | 0.393  | 0.157  | 0.445  | 0.782  | 9.79E-21 |
| BUB1B      | -0.606 | -0.783 | -0.771 | -0.304 | -0.575 | 1.00E-20 |
| MTUS1      | -0.349 | 0.057  | 0.097  | 0.187  | -0.163 | 1.02E-20 |
| TWF2       | 0.268  | 0.04   | 0.007  | 0.455  | 0.844  | 1.03E-20 |
| ZNF710     | -0.079 | -0.216 | 0.121  | 0.292  | 0.607  | 1.04E-20 |
| RASA1      | -0.199 | 0.041  | 0.003  | 0.204  | 0.531  | 1.04E-20 |
| WBP1L      | -0.052 | 0.144  | 0.134  | 0.263  | 0.465  | 1.06E-20 |
| FAM131A    | -0.668 | -0.29  | -0.072 | -0.07  | 0.155  | 1.06E-20 |
| EED        | 0.183  | 0.165  | -0.05  | -0.153 | -0.37  | 1.07E-20 |
| MAPKBP1    | -0.496 | 0.142  | 0.439  | -0.101 | 0.436  | 1.08E-20 |
| NEURL4     | -0.654 | -0.14  | -0.114 | -0.713 | -0.742 | 1.08E-20 |
| TBC1D16    | 0.31   | -0.133 | -0.157 | -0.123 | 0.512  | 1.09E-20 |
| NDE1       | -0.486 | -0.574 | -0.336 | 0.08   | 0.28   | 1.16E-20 |
| WLS        | 0.26   | 0.03   | -0.162 | 0.124  | 0.512  | 1.18E-20 |
| ERAP2      | -0.089 | 0.415  | 0.889  | 0.322  | 1.076  | 1.20E-20 |
| EHD4       | 0.338  | -0.156 | -0.082 | 0.356  | 0.687  | 1.20E-20 |
| UNKL       | -0.079 | 0.372  | 0.183  | 0.009  | -0.459 | 1.21E-20 |
| RNF115     | 0.137  | -0.09  | -0.168 | -0.228 | -0.35  | 1.22E-20 |
| RMND5A     | 0.336  | 0.128  | 0.073  | 0.296  | 0.627  | 1.26E-20 |
| MXD3       | -1.364 | -1.093 | -0.508 | -0.476 | -1.281 | 1.28E-20 |
| MTMR2      | 0.106  | -0.036 | -0.143 | -0.082 | -0.489 | 1.39E-20 |
| STARD4     | 0.203  | -0.103 | -0.297 | -0.69  | -0.564 | 1.39E-20 |
| RNF10      | 0.166  | 0.068  | 0.08   | 0.344  | 0.607  | 1.40E-20 |
| PAPD5      | 0.692  | 0.443  | 0.473  | 0.58   | 0.809  | 1.42E-20 |
| PRKCA      | 0.484  | 0.01   | 0.109  | 0.498  | 0.695  | 1.52E-20 |
| RP6-99M1.2 | -1.032 | 0.2    | 0.403  | -0.724 | -0.388 | 1.52E-20 |

|            |        |        |        |        |        |          |
|------------|--------|--------|--------|--------|--------|----------|
| S100A10    | 0.175  | 0.03   | 0.092  | 0.256  | 0.493  | 1.55E-20 |
| TOB1       | 0.566  | 0.519  | 0.303  | 0.448  | 0.939  | 1.59E-20 |
| CFAP97     | 0.059  | 0.156  | 0.358  | 0.484  | 0.653  | 1.68E-20 |
| NCS1       | 0.429  | 0.086  | -0.089 | 0.129  | 0.685  | 1.72E-20 |
| LINS1      | -0.068 | 0.207  | -0.074 | -0.51  | -0.752 | 1.76E-20 |
| FYCO1      | -0.29  | 0.117  | 0.438  | 0.306  | 0.285  | 1.80E-20 |
| KDSR       | 0.417  | 0.153  | -0.037 | 0.049  | 0.307  | 1.87E-20 |
| HERC2P2    | -1.062 | -0.202 | 0.08   | -0.937 | -0.873 | 1.88E-20 |
| KLHL6      | 0.408  | -0.056 | 0.177  | 0.442  | 1.119  | 1.92E-20 |
| SFXN5      | 0.03   | 0.43   | 0.198  | -0.22  | -0.179 | 1.92E-20 |
| JRK        | -0.557 | -0.195 | -0.074 | -0.543 | -0.763 | 1.96E-20 |
| IL18R1     | 0.281  | 0.206  | -0.164 | -0.582 | -0.603 | 1.99E-20 |
| ATP9A      | 0.335  | 0.148  | 0.156  | 0.234  | 0.768  | 2.03E-20 |
| RUSC1      | 0.157  | 0.22   | -0.049 | -0.182 | -0.34  | 2.03E-20 |
| TTLL5      | 0.127  | -0.076 | 0.113  | 0.48   | 0.724  | 2.12E-20 |
| AC019178.1 | 0.411  | 0.017  | -0.066 | 0.305  | 0.611  | 2.12E-20 |
| GGA3       | -0.395 | 0.007  | -0.093 | -0.457 | -0.443 | 2.12E-20 |
| PRPS1      | 0.196  | -0.062 | -0.255 | -0.131 | -0.483 | 2.19E-20 |
| TNIP2      | -0.077 | 0.215  | 0.088  | 0.036  | 0.507  | 2.21E-20 |
| RP11-296E7 | 1.028  | 0.366  | 0.245  | 0.293  | 0.532  | 2.34E-20 |
| STAT2      | -0.388 | 0.041  | 0.141  | -0.332 | -0.486 | 2.35E-20 |
| AC068831.1 | -1.251 | -0.793 | -0.544 | -1.205 | -1.571 | 2.36E-20 |
| HECW2      | 0.315  | 0.232  | 0.336  | 0.219  | 0.651  | 2.47E-20 |
| HMGCL      | 0.185  | 0.239  | 0.375  | 0.744  | 0.659  | 2.49E-20 |
| ZNF33B     | -0.173 | -0.074 | 0.345  | 0.313  | 0.533  | 2.52E-20 |
| PITPNC1    | 0.142  | -0.044 | -0.068 | 0.158  | 1.078  | 2.63E-20 |
| AMH        | -0.33  | 0.016  | -0.482 | -1.649 | -1.757 | 2.66E-20 |
| GLIPR1     | 0.13   | 0.153  | 0.096  | 0.115  | 0.545  | 2.83E-20 |
| BRWD3      | -0.349 | 0.15   | 0.16   | -0.352 | -0.602 | 2.83E-20 |
| YWHAQ      | 0.278  | 0.103  | -0.003 | 0.28   | 0.446  | 2.85E-20 |
| SPTBN5     | -0.609 | -0.293 | 0.148  | -0.775 | 0.548  | 2.88E-20 |
| CHN1       | 0.14   | -0.101 | -0.039 | 0.003  | 0.815  | 2.92E-20 |
| CLDN7      | -0.571 | -0.174 | 0.194  | -0.083 | 0.823  | 2.94E-20 |
| CTSZ       | 0.222  | 0.065  | 0.014  | 0.463  | 0.755  | 2.95E-20 |
| CENPP      | -0.236 | 0.154  | 0.16   | 0.244  | -0.647 | 2.98E-20 |
| TMEM41A    | 0.117  | 0.078  | -0.206 | -0.179 | -0.513 | 3.10E-20 |
| LDLRAD3    | 0.325  | -0.094 | 0.029  | 0.327  | 0.63   | 3.12E-20 |
| CEACAM19   | -0.353 | 0.227  | 0.85   | 0.09   | 0.919  | 3.17E-20 |



|            |        |        |        |        |        |          |
|------------|--------|--------|--------|--------|--------|----------|
| RNF168     | 0.133  | -0.06  | -0.064 | -0.093 | -0.517 | 3.27E-20 |
| RBL2       | -0.215 | -0.142 | 0.09   | 0.169  | 0.443  | 3.35E-20 |
| MLLT1      | 0.375  | -0.232 | -0.286 | -0.191 | -0.485 | 3.36E-20 |
| GBP1       | 0.239  | 0.367  | 0.266  | 0.454  | 0.9    | 3.39E-20 |
| PGM2L1     | 0.328  | 0.367  | 0.166  | 0.398  | 0.822  | 3.45E-20 |
| TPM1       | 0.436  | -0.047 | -0.275 | -0.208 | 0.065  | 3.47E-20 |
| KPNA2      | -0.265 | -0.661 | -0.721 | 0.018  | 0.187  | 3.78E-20 |
| TMEM64     | 0.515  | 0.101  | -0.078 | 0.098  | 0.293  | 3.81E-20 |
| NRARP      | 0.472  | -0.237 | -0.024 | 0.282  | 0.665  | 3.90E-20 |
| FICD       | -0.047 | 0.094  | -0.277 | -0.431 | -0.819 | 3.91E-20 |
| HHEX       | 0.627  | 0.135  | -0.096 | -0.117 | -0.137 | 4.46E-20 |
| NECAP1     | 0.105  | 0.245  | -0.035 | -0.059 | -0.481 | 4.77E-20 |
| PPP2R5B    | -0.546 | 0.257  | 0.231  | -0.053 | 0.109  | 4.82E-20 |
| ANAPC15    | -0.012 | -0.025 | -0.131 | -0.212 | -0.59  | 4.85E-20 |
| RBM12B     | -0.302 | 0.139  | -0.021 | -0.345 | -0.533 | 5.08E-20 |
| TNC        | 0.512  | 0.138  | -0.034 | -0.016 | 1.301  | 5.12E-20 |
| SUMF1      | 0.153  | 0.109  | 0.093  | 0.435  | 0.743  | 5.13E-20 |
| NT5DC3     | -0.012 | -0.197 | 0.086  | -0.672 | -0.784 | 5.13E-20 |
| MCFD2      | 0.074  | -0.101 | -0.074 | 0.146  | 0.399  | 5.30E-20 |
| RNF207     | -0.575 | 0.576  | 1.127  | 0.147  | 1.303  | 5.31E-20 |
| SIN3B      | -0.27  | 0.115  | 0.333  | 0.059  | 0.33   | 6.27E-20 |
| AC093509.1 | -0.173 | -0.182 | -0.046 | -0.137 | -0.958 | 6.35E-20 |
| C11orf71   | -0.232 | 0.051  | -0.006 | -0.292 | -1.258 | 6.56E-20 |
| PHKG2      | -0.212 | -0.038 | -0.243 | -0.57  | -0.686 | 6.60E-20 |
| PTEN       | 0.157  | 0.241  | 0.099  | 0.303  | 0.6    | 6.80E-20 |
| CIT        | -0.663 | -0.603 | -0.414 | -0.393 | -0.273 | 6.90E-20 |
| SLC24A1    | -0.441 | -0.24  | 0.187  | 0.194  | 0.401  | 6.92E-20 |
| PLD3       | 0.167  | -0.008 | -0.056 | 0.404  | 0.738  | 6.98E-20 |
| CAT        | 0.133  | -0.078 | -0.146 | 0.382  | 0.651  | 6.98E-20 |
| RP11-793E1 | 0.434  | -0.113 | -0.428 | -0.311 | -1.228 | 7.06E-20 |
| RACK1      | 0.181  | 0.035  | 0.056  | 0.235  | 0.422  | 7.09E-20 |
| MGA        | -0.582 | -0.078 | 0.113  | -0.006 | 0.173  | 7.15E-20 |
| DNAJC3     | 0.401  | 0.028  | -0.116 | -0.006 | -0.387 | 7.21E-20 |
| NOP16      | 0.02   | -0.142 | -0.306 | -0.161 | -0.614 | 7.28E-20 |
| CENPL      | -0.587 | -0.583 | -0.497 | -0.597 | -1.02  | 7.32E-20 |
| ZBTB1      | 0.354  | 0.093  | 0.28   | 0.428  | 0.657  | 8.15E-20 |
| GRAMD1A    | -0.191 | -0.057 | 0.097  | -0.043 | 0.492  | 8.21E-20 |
| ERAP1      | 0.315  | 0.158  | 0.082  | 0.467  | 0.798  | 8.50E-20 |

|             |        |        |        |        |        |          |
|-------------|--------|--------|--------|--------|--------|----------|
| EXD2        | -0.006 | 0.034  | 0.261  | 0.474  | 0.62   | 8.77E-20 |
| CTB-50E14.1 | 0.676  | 0.248  | 0.138  | 0.212  | 0.751  | 8.97E-20 |
| RQCD1       | 0.267  | 0.044  | -0.092 | -0.056 | -0.324 | 9.01E-20 |
| CTD-2228K2  | -0.896 | 0.313  | 0.5    | -0.552 | -0.705 | 9.03E-20 |
| ACOT11      | 0.536  | -0.113 | -0.307 | -0.139 | -0.657 | 9.22E-20 |
| FAM83G      | 0.683  | 0.227  | 0.777  | 0.802  | 0.627  | 9.29E-20 |
| LIMK1       | 0.152  | -0.134 | -0.032 | 0.294  | 0.669  | 9.73E-20 |
| ZBTB40      | -0.281 | 0.336  | 0.369  | -0.18  | -0.088 | 9.82E-20 |
| FXR1        | 0.157  | 0.185  | 0.147  | 0.422  | 0.631  | 9.84E-20 |
| GOLGA2      | 0.04   | 0.098  | 0.038  | -0.357 | -0.42  | 9.87E-20 |
| LRBA        | 0.387  | 0.13   | 0.084  | 0.549  | 0.833  | 1.00E-19 |
| APLP2       | 0.354  | 0.165  | 0.053  | 0.478  | 0.846  | 1.01E-19 |
| TEX30       | -0.374 | -0.062 | -0.173 | -1.019 | -1.398 | 1.05E-19 |
| RP11-22B23  | -0.609 | -0.052 | -0.102 | -1.107 | -1.765 | 1.05E-19 |
| PDE4DIP     | -0.197 | 0.197  | 0.212  | 0.29   | 0.478  | 1.10E-19 |
| KCMF1       | 0.368  | -0.064 | -0.173 | -0.189 | -0.195 | 1.12E-19 |
| VGLL4       | -0.02  | 0.424  | 0.161  | -0.222 | 0.257  | 1.15E-19 |
| XXyac-R12D  | 0.236  | 0.224  | 0.205  | 0.552  | 0.791  | 1.20E-19 |
| PRDM2       | 0.465  | 0.137  | -0.046 | -0.213 | -0.042 | 1.20E-19 |
| WEE1        | -0.493 | -0.498 | -0.554 | -0.643 | -0.618 | 1.25E-19 |
| FAM63B      | -0.179 | 0.168  | 0.412  | 0.565  | 0.42   | 1.26E-19 |
| LOXL1       | 0.088  | 0.022  | 0.045  | 0.229  | 0.935  | 1.28E-19 |
| SYNE2       | -0.225 | 0.147  | -0.187 | -0.296 | -0.966 | 1.28E-19 |
| SMAD7       | 1.419  | -0.189 | 0.102  | 0.287  | -0.718 | 1.29E-19 |
| TWIST2      | 0.002  | -0.308 | -0.21  | 0.097  | 0.991  | 1.32E-19 |
| AC005264.2  | -0.242 | 0.906  | 1.478  | 1.136  | 0.997  | 1.34E-19 |
| ATP13A2     | 0.044  | -0.115 | 0.006  | 0.31   | 0.536  | 1.38E-19 |
| CABYR       | 0.359  | 0.873  | 0.859  | 0.954  | 1.769  | 1.39E-19 |
| CTC-259J15  | 0.383  | 0.161  | 0.238  | 0.613  | 0.799  | 1.45E-19 |
| TWSG1       | 0.103  | 0.113  | -0.051 | 0.097  | 0.442  | 1.53E-19 |
| SNORD86     | -0.457 | -0.421 | -0.266 | -1.518 | -1.325 | 1.58E-19 |
| CH507-42P1  | -0.168 | 0.453  | 0.225  | 0.244  | 1.068  | 1.65E-19 |
| RAPGEF2     | 0.338  | 0.169  | 0.185  | 0.34   | 0.613  | 1.67E-19 |
| AD000090.2  | -0.739 | 0.122  | 0.034  | -0.753 | -0.96  | 1.72E-19 |
| SLC16A4     | 0.093  | 0.026  | -0.025 | 0.427  | 0.931  | 1.73E-19 |
| AP000347.2  | -0.556 | 0.158  | 0.508  | -0.865 | -0.613 | 1.73E-19 |
| MSX1        | 0.501  | 0.363  | -0.182 | -0.319 | 0.573  | 1.75E-19 |
| ROR1        | 0.448  | 0.121  | 0.182  | 0.339  | 0.89   | 1.90E-19 |

|            |        |        |        |        |        |          |
|------------|--------|--------|--------|--------|--------|----------|
| GSAP       | -0.403 | -0.2   | 0.679  | 0.402  | 1.388  | 1.91E-19 |
| MBD4       | 0.142  | -0.07  | -0.067 | -0.301 | -0.406 | 1.95E-19 |
| ARID4B     | 0.119  | 0.397  | 0.046  | 0.081  | 0.454  | 1.97E-19 |
| HMGA1P2    | 0.231  | 0.098  | 0.171  | 0.529  | 1.018  | 1.98E-19 |
| RPL4       | 0.2    | 0.119  | 0.072  | 0.248  | 0.395  | 1.98E-19 |
| MADD       | 0.231  | 0.092  | -0.024 | -0.071 | -0.324 | 2.01E-19 |
| CTD-2270P1 | -0.857 | 0.042  | 0.124  | -0.876 | -0.919 | 2.05E-19 |
| CCSER2     | 0.851  | 0.469  | 0.056  | 0.13   | 0.071  | 2.18E-19 |
| IFRD1      | -0.095 | -0.134 | -0.213 | -0.537 | -0.507 | 2.19E-19 |
| TEP1       | -0.06  | 0.156  | 0.277  | -0.165 | 0.453  | 2.27E-19 |
| HADHB      | 0.268  | 0.17   | 0.132  | 0.483  | 0.678  | 2.30E-19 |
| LRPAP1     | 0.163  | 0.241  | 0.122  | 0.489  | 0.736  | 2.32E-19 |
| NCOR1      | 0.057  | -0.011 | 0.068  | 0.323  | 0.605  | 2.33E-19 |
| CENPJ      | -0.146 | -0.027 | -0.126 | -0.572 | -0.755 | 2.46E-19 |
| THAP5      | -0.097 | 0.082  | -0.145 | -0.368 | -0.65  | 2.66E-19 |
| HYI        | -0.679 | -0.185 | 0.191  | -0.014 | 0.557  | 2.72E-19 |
| RP11-322E1 | -0.559 | -0.142 | 0.348  | 0.249  | 1.574  | 2.75E-19 |
| NAA16      | -0.054 | -0.055 | -0.134 | -0.579 | -0.586 | 2.75E-19 |
| ACTN1      | 0.4    | 0.061  | 0.043  | 0.49   | 0.996  | 2.88E-19 |
| POLE3      | 0.097  | -0.076 | -0.17  | -0.144 | -0.346 | 2.89E-19 |
| ABCA6      | -0.239 | 0.101  | 0.069  | -0.253 | -0.664 | 2.91E-19 |
| THSD4      | 0.439  | 0.093  | -0.292 | -0.051 | 0.595  | 2.97E-19 |
| PDLIM7     | 0.169  | -0.155 | -0.034 | -0.054 | 0.335  | 3.01E-19 |
| LPP        | 0.448  | 0.051  | 0.021  | 0.268  | 0.687  | 3.05E-19 |
| CDC25B     | -0.455 | -0.642 | -0.403 | -0.207 | -0.433 | 3.25E-19 |
| ZDHHC9     | 0.174  | 0.094  | 0.083  | 0.335  | 0.693  | 3.57E-19 |
| ALCAM      | 0.113  | 0.106  | -0.106 | 0.162  | -0.617 | 3.75E-19 |
| VAMP5      | -0.238 | -0.26  | -0.114 | -0.109 | 0.47   | 3.81E-19 |
| RNF219     | 0.244  | -0.144 | -0.306 | -0.12  | -0.42  | 3.97E-19 |
| RP5-857K21 | -0.331 | -0.333 | 0.028  | -1.491 | -1.356 | 4.15E-19 |
| CTD-2119F7 | 0.258  | 0.244  | 0.257  | 0.657  | 0.439  | 4.38E-19 |
| TRMT1L     | -0.413 | 0.182  | 0.055  | 0.424  | 0.132  | 4.44E-19 |
| IKKB       | -0.246 | 0.115  | 0.393  | 0.069  | 0.376  | 4.45E-19 |
| USP49      | 0.254  | 0.656  | 0.532  | -0.321 | -0.154 | 4.45E-19 |
| SPDL1      | -0.195 | -0.425 | -0.282 | 0.037  | -0.24  | 4.49E-19 |
| PSMG1      | 0.101  | -0.063 | -0.245 | -0.1   | -0.539 | 4.51E-19 |
| TTYH3      | 0.236  | 0.032  | -0.014 | 0.249  | 0.707  | 4.58E-19 |
| CROT       | -0.057 | 0.643  | 0.603  | 0.592  | 0.671  | 4.64E-19 |

|             |        |        |        |        |        |          |
|-------------|--------|--------|--------|--------|--------|----------|
| ZBTB21      | 0.403  | 0.72   | 0.465  | 0.356  | 0.362  | 4.64E-19 |
| GLB1        | 0.25   | 0.097  | -0.02  | 0.466  | 0.705  | 4.66E-19 |
| PHLDB1      | 0.579  | 0.168  | 0.268  | 0.138  | 0.469  | 4.70E-19 |
| TOR3A       | -0.093 | -0.085 | -0.188 | -0.175 | -0.722 | 4.70E-19 |
| EI24        | 0.256  | 0.294  | 0.313  | 0.472  | 0.472  | 4.72E-19 |
| KATNAL1     | 0.278  | 0.066  | 0.076  | 0.003  | -0.349 | 4.83E-19 |
| NLRC5       | 0.072  | 0.043  | 0.322  | 0.14   | 0.833  | 4.88E-19 |
| VPS35       | 0.27   | 0.017  | 0.025  | 0.459  | 0.623  | 4.99E-19 |
| FAM160A2    | -0.574 | -0.066 | 0.055  | -0.527 | -0.478 | 5.15E-19 |
| MIR1304     | -0.378 | 0.071  | 0.032  | -1.143 | -1.197 | 5.16E-19 |
| RPS6KB2     | -0.103 | 0.023  | -0.121 | -0.397 | -0.547 | 5.19E-19 |
| AGAP1       | 0.548  | 0.003  | 0.06   | 0.465  | 0.583  | 5.21E-19 |
| RP4-591C20  | -0.897 | -0.043 | -0.189 | -0.547 | -0.803 | 5.29E-19 |
| NFKBID      | -0.118 | 0.032  | -0.163 | -1.01  | -1.057 | 5.38E-19 |
| MTHFR       | -0.621 | -0.098 | 0.086  | -0.04  | -0.175 | 5.49E-19 |
| BMP6        | 0.148  | 0.073  | -0.165 | 0.09   | -0.717 | 5.49E-19 |
| FBF1        | -0.765 | 0.097  | 0.236  | -0.37  | -0.544 | 5.51E-19 |
| RP11-95D17  | 0.116  | 0.067  | 0.162  | 0.705  | 1.117  | 5.56E-19 |
| CCDC92      | 0.361  | 0.228  | 0.286  | 0.355  | 0.72   | 5.79E-19 |
| PLTP        | 0.366  | 0.239  | 0.083  | 0.454  | 0.999  | 5.88E-19 |
| ITGAV       | 0.42   | 0.232  | -0.148 | 0.001  | -0.57  | 5.89E-19 |
| GIMAP2      | -0.802 | -0.168 | 0.101  | 0.16   | 0.218  | 5.92E-19 |
| RP11-513I15 | -0.522 | 0.074  | 0.764  | 0.943  | 0.804  | 6.01E-19 |
| FOXRED1     | -0.045 | -0.005 | -0.061 | -0.211 | -0.681 | 6.01E-19 |
| FAM26E      | -0.002 | -0.311 | -0.65  | -0.425 | -0.327 | 6.08E-19 |
| SLC26A6     | -0.488 | -0.271 | -0.261 | -0.999 | -1.061 | 6.17E-19 |
| HSPA5       | 0.499  | 0.032  | -0.26  | 0.011  | -0.539 | 6.28E-19 |
| ZNF219      | -0.224 | 0.374  | 0.716  | 0.486  | 1.365  | 6.42E-19 |
| MCM7        | 0.471  | 0.088  | -0.221 | -0.182 | -0.443 | 6.48E-19 |
| CENPT       | -0.472 | -0.071 | -0.077 | -0.633 | -0.723 | 6.49E-19 |
| MT-RNR1     | -0.832 | -0.299 | 0.191  | -1.281 | -0.985 | 6.59E-19 |
| ITGB8       | -0.633 | 0.507  | 0.404  | 0.26   | 0.449  | 6.64E-19 |
| MDC1        | 0.007  | -0.106 | -0.215 | -0.411 | -0.508 | 6.78E-19 |
| MAP1LC3B2   | 0.108  | 0.045  | 0.077  | 0.287  | 0.69   | 6.96E-19 |
| PLAGL1      | -0.165 | 0.249  | 0.244  | -0.268 | -0.342 | 7.01E-19 |
| SYDE1       | -0.395 | -0.135 | -0.352 | -0.663 | -0.493 | 7.09E-19 |
| CYB561D2    | 0.001  | -0.151 | -0.108 | 0.006  | -0.694 | 7.15E-19 |
| PALMD       | 0.169  | -0.041 | -0.045 | 0.237  | -0.455 | 7.25E-19 |

|          |        |        |        |        |        |          |
|----------|--------|--------|--------|--------|--------|----------|
| DENND3   | -0.097 | 0.238  | 0.583  | 0.333  | 0.271  | 7.27E-19 |
| KIAA1671 | 0.132  | 0.269  | 0.408  | 0.524  | 0.8    | 7.32E-19 |
| TYK2     | -0.157 | 0.054  | 0.061  | -0.289 | -0.503 | 7.37E-19 |
| TOP3A    | -0.058 | -0.051 | -0.215 | -0.303 | -0.626 | 7.74E-19 |
| DCAF15   | -0.206 | -0.142 | -0.282 | -0.543 | -0.766 | 7.94E-19 |
| RHBDD3   | -0.165 | 0.076  | -0.184 | -0.344 | -0.775 | 8.24E-19 |
| UVSSA    | -0.367 | 0.023  | 0.245  | -0.445 | -0.702 | 8.27E-19 |
| C11orf91 | 0.233  | 0.719  | 0.73   | -0.298 | -0.85  | 8.36E-19 |
| CACNG8   | -0.361 | -0.238 | -0.001 | -0.937 | -1.149 | 8.65E-19 |
| IL21R    | 1.534  | 0.253  | -0.048 | 0.011  | -1.148 | 8.67E-19 |
| PREX1    | 0.345  | -0.273 | -0.469 | -0.25  | -0.686 | 8.78E-19 |
| LSM11    | 0.449  | 0.025  | -0.068 | 0.029  | -0.285 | 8.87E-19 |
| KHDRBS3  | 0.024  | 0.026  | 0.161  | 0.591  | 0.704  | 8.95E-19 |
| PRR5L    | -0.335 | -0.382 | -0.205 | -0.385 | 0.888  | 9.06E-19 |
| LPCAT3   | 0.079  | 0.123  | -0.012 | 0.191  | -0.612 | 9.13E-19 |
| CDK17    | -0.12  | -0.028 | 0      | 0.065  | 0.349  | 9.30E-19 |
| NMI      | 0.168  | 0.07   | 0.156  | 0.578  | 0.672  | 9.62E-19 |
| MFSD6    | 0.216  | 0.496  | 0.382  | 0.614  | 1.45   | 9.69E-19 |
| KIAA0430 | -0.026 | 0.116  | 0.246  | 0.338  | 0.408  | 9.82E-19 |
| UBE2SP1  | -0.221 | -0.65  | -0.937 | -0.703 | -0.598 | 9.90E-19 |
| ZBED1    | 0.435  | 0.196  | -0.213 | 0.094  | 0.582  | 9.96E-19 |
| TOP2A    | -0.618 | -0.903 | -0.728 | -0.06  | -0.241 | 1.02E-18 |
| UBXN1    | 0.182  | 0.185  | 0.2    | 0.41   | 0.593  | 1.03E-18 |
| JADE2    | -0.278 | -0.168 | 0.102  | 0.162  | 0.382  | 1.03E-18 |
| LRRFIP1  | 0.285  | -0.103 | 0.055  | 0.429  | 0.535  | 1.05E-18 |
| SKP2     | -0.319 | -0.282 | -0.331 | -0.302 | -0.812 | 1.06E-18 |
| WDR45    | -0.187 | 0.04   | 0.324  | 0.206  | 0.664  | 1.07E-18 |
| DCK      | -0.013 | -0.172 | -0.312 | -0.507 | -0.704 | 1.07E-18 |
| FBXL17   | 0.288  | 0.022  | 0.203  | 0.442  | 0.916  | 1.09E-18 |
| CARD6    | 0.435  | 0.353  | 0.334  | 0.656  | 0.762  | 1.10E-18 |
| SPATS2   | 0.136  | 0.033  | 0.056  | 0.284  | 0.486  | 1.10E-18 |
| TMTC4    | -0.123 | -0.059 | 0.131  | 0.142  | 0.743  | 1.12E-18 |
| ALG6     | -0.122 | 0.046  | 0.045  | 0.081  | -0.598 | 1.12E-18 |
| CABIN1   | -0.06  | -0.258 | 0.057  | 0.233  | 0.392  | 1.15E-18 |
| MYEOV    | -0.52  | 0.083  | 0.268  | 0.144  | 0.874  | 1.17E-18 |
| MFSD3    | -0.698 | -0.14  | -0.184 | -0.296 | 0.606  | 1.17E-18 |
| CAPZA2   | -0.23  | -0.255 | -0.383 | -0.755 | -1.019 | 1.20E-18 |
| RF02271  | -0.804 | 0.102  | 0.064  | -0.994 | -0.975 | 1.21E-18 |

|            |        |        |        |        |        |          |
|------------|--------|--------|--------|--------|--------|----------|
| TUBGCP5    | 0.151  | 0.073  | 0.026  | -0.05  | -0.534 | 1.22E-18 |
| DZIP1L     | -0.239 | -0.02  | -0.127 | -0.85  | -1.026 | 1.23E-18 |
| ZNF142     | 0.009  | 0.036  | -0.056 | -0.309 | -0.548 | 1.25E-18 |
| UBE2R2     | 0.278  | -0.002 | -0.034 | 0.296  | 0.685  | 1.26E-18 |
| ARL6IP5    | -0.125 | -0.183 | -0.148 | 0.083  | 0.335  | 1.26E-18 |
| ULBP2      | 0.365  | 0.223  | -0.049 | 0.062  | -0.767 | 1.27E-18 |
| GIT2       | -0.099 | -0.086 | 0.116  | 0.288  | 0.508  | 1.30E-18 |
| CXCL3      | 0.966  | 0.711  | -0.194 | -0.468 | 0.981  | 1.31E-18 |
| RGS17      | -0.448 | -0.141 | 0.339  | -0.051 | 1.074  | 1.38E-18 |
| EPB41L1    | 0.192  | -0.15  | -0.028 | 0.437  | 0.776  | 1.40E-18 |
| TNKS       | -0.106 | 0.21   | 0.149  | 0.263  | 0.624  | 1.42E-18 |
| MICAL2     | 0.463  | -0.059 | 0.103  | 0.525  | 0.731  | 1.50E-18 |
| DHX40      | 0.104  | 0.238  | 0.255  | 0.446  | 0.501  | 1.58E-18 |
| HTRA1      | 0.344  | 0.055  | -0.093 | 0.315  | 0.654  | 1.59E-18 |
| GDI1       | -0.065 | -0.018 | -0.028 | -0.301 | -0.419 | 1.62E-18 |
| BCOR       | 0.966  | -0.26  | 0.188  | 0.352  | 0.517  | 1.71E-18 |
| CCDC150    | -0.6   | -0.055 | -0.106 | -0.927 | -1.418 | 1.73E-18 |
| RP11-540B6 | -0.402 | 0.155  | 0.129  | -0.772 | -0.932 | 1.78E-18 |
| ABL1       | 0.452  | -0.128 | 0.075  | 0.424  | 0.59   | 1.79E-18 |
| SEC11C     | -0.147 | -0.138 | -0.085 | -0.175 | -1.15  | 1.81E-18 |
| THBS1      | 0.212  | 0.033  | -0.255 | -0.194 | -0.64  | 1.83E-18 |
| DBF4B      | -0.861 | -0.517 | -0.437 | -0.804 | -0.94  | 1.84E-18 |
| TSC22D4    | -0.676 | -0.149 | -0.024 | -0.145 | 0.043  | 1.98E-18 |
| PGPEP1     | -0.753 | 0.03   | 0.427  | 0.037  | 0.308  | 2.00E-18 |
| EZH1       | -0.589 | 0.059  | 0.333  | -0.41  | -0.48  | 2.09E-18 |
| CASP10     | -0.109 | 0.349  | 0.312  | 0.334  | 0.577  | 2.13E-18 |
| NDUFC2     | 0.005  | -0.181 | -0.276 | -0.279 | -0.76  | 2.16E-18 |
| GALC       | 0.011  | 0.059  | -0.137 | 0.182  | -0.629 | 2.23E-18 |
| CLDN11     | 0.059  | -0.04  | 0.268  | 0.48   | 0.834  | 2.34E-18 |
| NOA1       | -0.021 | -0.148 | -0.026 | 0.162  | 0.558  | 2.35E-18 |
| HNRNPA1P7  | 0.222  | 0.219  | 0.265  | 0.624  | 0.475  | 2.40E-18 |
| RP11-456N1 | -1.062 | -0.407 | 0.398  | -0.358 | 1.187  | 2.54E-18 |
| C3orf67    | 0.687  | 1.4    | 1.49   | 1.296  | 1.099  | 2.67E-18 |
| GMPPA      | 0.119  | 0.041  | -0.058 | 0.051  | -0.529 | 2.69E-18 |
| HK2        | -0.655 | -0.375 | -0.519 | -0.586 | -1.128 | 2.71E-18 |
| BLM        | 0.383  | 0.254  | -0.006 | 0.013  | -0.539 | 2.73E-18 |
| PPP3CA     | 0.244  | -0.113 | -0.152 | 0.092  | 0.781  | 2.81E-18 |
| MEIS1      | -0.57  | -0.072 | -0.369 | -0.39  | -0.796 | 2.82E-18 |

|            |        |        |        |        |        |          |
|------------|--------|--------|--------|--------|--------|----------|
| SREBF1     | 0.096  | -0.033 | -0.165 | -0.147 | 0.465  | 2.88E-18 |
| C14orf1    | 0.218  | -0.109 | -0.336 | -0.234 | -0.318 | 2.91E-18 |
| VPS50      | -0.03  | 0.184  | 0.366  | 0.524  | 0.419  | 3.14E-18 |
| CLIC3      | 0.484  | -0.038 | -0.39  | -0.193 | -1.018 | 3.14E-18 |
| UPP1       | -0.237 | -0.014 | 0.033  | -0.152 | -0.599 | 3.18E-18 |
| EVA1C      | 0.239  | -0.196 | 0.127  | 0.237  | -0.386 | 3.19E-18 |
| FOXJ3      | 0.172  | 0.046  | 0.086  | 0.094  | 0.461  | 3.22E-18 |
| MBD6       | -0.355 | -0.015 | -0.103 | -0.462 | -0.433 | 3.36E-18 |
| BTG3       | 0.004  | 0.096  | -0.217 | -0.581 | -0.539 | 3.39E-18 |
| NOL12      | -0.554 | -0.181 | -0.117 | -0.699 | -0.982 | 3.39E-18 |
| SGCE       | -0.023 | -0.174 | -0.177 | 0.099  | 0.391  | 3.52E-18 |
| RP11-110C1 | 0.185  | 0.022  | 0.021  | 0.211  | 0.328  | 3.58E-18 |
| BAX        | 0.229  | 0.339  | 0.427  | 0.561  | 0.477  | 3.62E-18 |
| MAP3K12    | -0.865 | -0.317 | -0.059 | -0.528 | -0.128 | 3.74E-18 |
| FRMD8      | 0.421  | 0.058  | 0.077  | 0.01   | 0.305  | 3.84E-18 |
| PPP1R12B   | -0.731 | 0.02   | 0.198  | -0.598 | -0.696 | 3.89E-18 |
| SZT2       | -0.287 | 0.111  | 0.16   | -0.41  | -0.514 | 3.99E-18 |
| AIFM2      | 0.23   | 0.27   | 0.136  | 0.402  | -0.521 | 4.07E-18 |
| HAUS2      | 0.143  | 0.062  | -0.047 | -0.133 | -0.412 | 4.18E-18 |
| IL18BP     | -0.086 | 0.037  | -0.003 | -0.415 | -0.64  | 4.19E-18 |
| HMGA2      | -0.127 | -0.11  | 0.17   | 0.394  | 0.057  | 4.27E-18 |
| SNORA73A   | -0.256 | 0.097  | 0.088  | -0.904 | -1.395 | 4.33E-18 |
| DCLRE1A    | -0.301 | -0.235 | -0.195 | -0.113 | -0.774 | 4.49E-18 |
| LRRC8C     | 0.327  | 0.028  | -0.235 | -0.033 | -0.207 | 4.50E-18 |
| AP2B1      | 0.299  | 0.102  | 0.094  | 0.456  | 0.864  | 4.54E-18 |
| HAGH       | -0.166 | -0.098 | -0.011 | 0.282  | 0.44   | 4.57E-18 |
| AC017048.3 | -0.158 | -0.179 | 0.203  | 0.476  | 0.351  | 4.59E-18 |
| ZDHHC13    | -0.512 | -0.269 | -0.022 | -0.046 | 0.38   | 4.64E-18 |
| LIN52      | -0.1   | -0.239 | -0.467 | -0.45  | -0.744 | 4.66E-18 |
| GVINP1     | -0.311 | -0.054 | 0      | -0.137 | 1.114  | 4.71E-18 |
| SNORA61    | -0.226 | 0.053  | 0.027  | -1.161 | -1.147 | 4.74E-18 |
| SIPA1L2    | 0.565  | 0.643  | 0.239  | 0.407  | 0.737  | 4.80E-18 |
| HEXA       | 0.188  | 0.09   | 0.067  | 0.33   | 0.46   | 4.85E-18 |
| ATP6V0B    | -0.148 | -0.111 | -0.158 | -0.389 | -0.704 | 4.97E-18 |
| SLC25A13   | 0.281  | -0.035 | 0.021  | 0.395  | 0.625  | 4.99E-18 |
| MRI1       | -0.479 | -0.065 | -0.065 | -0.655 | -0.644 | 5.04E-18 |
| SLC26A11   | -0.032 | 0.075  | -0.031 | -0.445 | -0.526 | 5.08E-18 |
| GRSF1      | 0.144  | 0.003  | -0.042 | 0.217  | 0.463  | 5.10E-18 |

|             |        |        |        |        |        |          |
|-------------|--------|--------|--------|--------|--------|----------|
| ZEB2        | 0.536  | -0.278 | -0.29  | -0.166 | -0.317 | 5.14E-18 |
| TRIM5       | 0.481  | 0.572  | 0.583  | 0.763  | 0.977  | 5.23E-18 |
| SLC43A3     | -0.124 | -0.083 | 0.17   | 0.387  | 0.432  | 5.49E-18 |
| SCN5A       | -0.082 | 0.153  | 0.318  | 0.447  | 0.535  | 5.64E-18 |
| AC069513.3  | -0.114 | 0.195  | 0.196  | -0.89  | -0.744 | 5.64E-18 |
| SLF1        | 0.047  | -0.224 | -0.513 | -0.48  | -0.81  | 5.69E-18 |
| KLF12       | 0.18   | -0.051 | 0.345  | 0.294  | 0.624  | 5.70E-18 |
| LTB4R       | -0.522 | 0.214  | 0.367  | -0.65  | -0.727 | 5.79E-18 |
| DUSP8       | 0.16   | 0.711  | 0.757  | 0.09   | 1.221  | 5.89E-18 |
| MIR17HG     | -0.748 | -0.332 | -0.407 | -1.57  | -1.362 | 5.89E-18 |
| RP11-54A4.2 | -0.886 | -0.026 | 0.426  | -0.527 | -1.072 | 6.32E-18 |
| THOC6       | -0.135 | -0.277 | 0.014  | -0.042 | -0.725 | 6.44E-18 |
| BCL10       | -0.072 | 0.125  | 0.17   | 0.218  | 0.507  | 6.89E-18 |
| KANK1       | 0.306  | -0.313 | 0.073  | 0.327  | 0.313  | 6.89E-18 |
| GPR37       | 0.83   | 0.095  | 0.014  | 0.265  | 0.153  | 6.97E-18 |
| MT-ATP6     | -0.453 | -0.342 | 0.265  | -1.205 | -1.1   | 7.07E-18 |
| B3GNT5      | -0.137 | 0.12   | 0.03   | 0.063  | 0.643  | 7.08E-18 |
| RGS2        | -0.841 | -0.599 | -0.481 | -0.422 | 0.672  | 7.09E-18 |
| ZNF337      | -0.029 | 0.53   | 0.69   | -0.109 | 0.107  | 7.56E-18 |
| FAT1        | 0.318  | 0.12   | 0.191  | 0.27   | 1.14   | 7.61E-18 |
| IL17RA      | 0.134  | -0.186 | -0.255 | -0.257 | -0.581 | 7.82E-18 |
| SAMD9       | 0.374  | 0.304  | 0.429  | 0.83   | 0.996  | 7.92E-18 |
| MAZ         | -0.04  | -0.242 | -0.263 | -0.288 | -0.461 | 7.96E-18 |
| FAM161A     | -0.351 | -0.141 | -0.111 | -0.481 | -1.311 | 7.96E-18 |
| CRELD2      | 0.17   | -0.085 | -0.263 | -0.032 | -0.691 | 8.17E-18 |
| TCIRG1      | -0.264 | 0.146  | 0.046  | -0.486 | -0.606 | 8.28E-18 |
| DCP1B       | 0.72   | 0.792  | 0.897  | 0.851  | 0.928  | 8.31E-18 |
| MLLT10      | -0.532 | -0.16  | 0.06   | -0.184 | -0.236 | 8.49E-18 |
| NUSAP1      | -0.384 | -0.357 | -0.372 | -0.147 | -0.588 | 8.57E-18 |
| LZTFL1      | 0.181  | 0.047  | 0.077  | 0.408  | 0.818  | 8.69E-18 |
| TMEM163     | 0.161  | -0.244 | 0.024  | 0.198  | 1.082  | 8.95E-18 |
| AP000640.9  | -0.047 | -0.216 | -0.293 | -0.493 | 0.383  | 9.19E-18 |
| CCDC102A    | -0.346 | 0.102  | 0.144  | 0.082  | 0.858  | 9.29E-18 |
| NUP54       | 0.155  | 0.011  | -0.189 | -0.099 | -0.367 | 9.32E-18 |
| WDFY1       | 0.198  | -0.018 | -0.042 | 0.262  | 0.54   | 9.34E-18 |
| LINC00338   | -0.854 | -0.045 | 0.156  | -0.578 | -0.499 | 9.47E-18 |
| SLC35E2     | -0.513 | 0.065  | 0.156  | -0.199 | 0.218  | 9.89E-18 |
| TIMM21      | -0.04  | -0.011 | -0.046 | -0.106 | -0.616 | 9.89E-18 |



|            |        |        |        |        |        |          |
|------------|--------|--------|--------|--------|--------|----------|
| MINK1      | -0.211 | 0.122  | 0.317  | 0      | 0.355  | 1.01E-17 |
| MGST2      | -0.045 | -0.156 | -0.086 | 0.136  | 0.483  | 1.02E-17 |
| FAM64A     | -0.647 | -0.906 | -0.943 | -0.436 | -0.39  | 1.02E-17 |
| FAM189A2   | -0.361 | 0.024  | 0.37   | -0.175 | 0.742  | 1.03E-17 |
| RGS12      | -0.022 | 0.082  | 0.227  | 0.14   | 0.518  | 1.03E-17 |
| DHODH      | -0.054 | -0.033 | -0.137 | -0.235 | -0.894 | 1.04E-17 |
| UFM1       | 0.183  | 0.127  | -0.034 | -0.338 | -0.39  | 1.05E-17 |
| C11orf95   | 0.09   | 0.065  | -0.254 | -0.503 | 0.321  | 1.06E-17 |
| TNPO2      | -0.372 | -0.084 | -0.182 | -0.573 | -0.491 | 1.07E-17 |
| AC004383.4 | -1.754 | -0.275 | 0.089  | -0.781 | -0.507 | 1.07E-17 |
| NPEPPS     | 0.213  | 0.117  | 0.157  | 0.377  | 0.614  | 1.09E-17 |
| CENPU      | 0.127  | 0.13   | -0.019 | -0.35  | -0.709 | 1.09E-17 |
| TAGLN      | 0.268  | 0.042  | 0.149  | -0.09  | -1.029 | 1.11E-17 |
| UBTF       | 0.375  | -0.227 | -0.221 | 0.07   | 0.332  | 1.13E-17 |
| RGS4       | -0.379 | -0.102 | 0.009  | 0.5    | 0.376  | 1.16E-17 |
| CASKIN2    | 0.478  | -0.037 | -0.066 | -0.044 | -0.527 | 1.16E-17 |
| AK2        | 0.07   | -0.059 | -0.202 | -0.176 | -0.333 | 1.17E-17 |
| SAT1       | 0.15   | 0.565  | 0.196  | -0.582 | -0.45  | 1.17E-17 |
| TXNRD1     | 0.378  | 0.149  | -0.216 | -0.095 | -0.664 | 1.17E-17 |
| SFI1       | -0.385 | -0.2   | -0.035 | -0.62  | -0.755 | 1.18E-17 |
| SKAP2      | 0.191  | 0.105  | 0.081  | 0.531  | 0.678  | 1.19E-17 |
| TRIM47     | 0.415  | 0.508  | 0.322  | 0.324  | 0.901  | 1.20E-17 |
| PSAP       | 0.269  | 0.083  | -0.014 | 0.406  | 0.705  | 1.23E-17 |
| ADGRL1     | 0.349  | -0.028 | -0.413 | -0.627 | -0.937 | 1.24E-17 |
| GIGYF1     | -0.31  | 0.133  | 0.093  | -0.721 | -0.598 | 1.25E-17 |
| ELOVL6     | 0.104  | -0.287 | -0.361 | -0.247 | -0.87  | 1.25E-17 |
| SPAG5      | -0.351 | -0.506 | -0.489 | -0.255 | -0.655 | 1.26E-17 |
| TOE1       | -0.008 | -0.199 | -0.255 | -0.41  | -0.847 | 1.27E-17 |
| SPATA33    | -0.23  | -0.104 | -0.125 | -0.535 | -0.774 | 1.28E-17 |
| CARD10     | -0.096 | 0.065  | 0.304  | 0.391  | 0.617  | 1.29E-17 |
| SGK1       | 0.285  | 0.012  | -0.16  | -0.251 | -0.668 | 1.31E-17 |
| PDGFD      | 0.017  | -0.018 | 0.198  | 0.587  | 1.206  | 1.34E-17 |
| POLR3K     | -0.22  | -0.305 | -0.479 | -0.49  | -0.704 | 1.34E-17 |
| GATA3      | -0.016 | -0.298 | -0.483 | -0.128 | -1.134 | 1.35E-17 |
| AC087590.3 | -0.199 | 0.04   | 0.073  | -0.97  | -1.215 | 1.35E-17 |
| MCCC2      | 0.316  | 0.121  | 0.215  | 0.427  | 0.911  | 1.38E-17 |
| CTPS2      | -0.064 | -0.181 | 0.072  | 0.406  | 0.662  | 1.42E-17 |
| RALGAPB    | -0.017 | 0.287  | 0.225  | 0.096  | 0.341  | 1.42E-17 |

|              |        |        |        |        |        |          |
|--------------|--------|--------|--------|--------|--------|----------|
| CACNG6       | 0.325  | -0.254 | -0.424 | -0.317 | -1.123 | 1.42E-17 |
| TBC1D2B      | 0.058  | -0.085 | 0.163  | 0.137  | 0.356  | 1.48E-17 |
| RP11-77I22.: | 0.21   | 0.103  | -0.022 | 0.065  | -0.774 | 1.52E-17 |
| DAB2IP       | 0.55   | -0.14  | -0.063 | 0.09   | 0.222  | 1.55E-17 |
| HOXA10       | 0.178  | -0.518 | -0.322 | 0.096  | 0.033  | 1.57E-17 |
| MAT2A        | -0.304 | -0.214 | -0.17  | -0.676 | -0.461 | 1.57E-17 |
| DPH2         | 0.036  | -0.004 | -0.057 | -0.16  | -0.434 | 1.65E-17 |
| MT-ND2       | -0.42  | -0.305 | 0.325  | -1.188 | -1.099 | 1.77E-17 |
| EBAG9        | -0.031 | -0.004 | 0.037  | -0.048 | -0.752 | 1.78E-17 |
| ADRA1B       | 0.417  | -0.525 | -0.711 | -0.283 | -0.769 | 1.79E-17 |
| DAGLA        | -0.335 | 0.214  | 0.361  | 0.304  | 0.589  | 1.80E-17 |
| CENPI        | -0.693 | -0.341 | -0.177 | -0.247 | -0.461 | 1.83E-17 |
| C9orf37      | -0.779 | -0.185 | -0.252 | -0.722 | -0.936 | 1.83E-17 |
| NATD1        | -0.019 | 0.172  | -0.083 | 0.088  | 0.805  | 1.87E-17 |
| PSME4        | 0.188  | 0.354  | 0.276  | 0.501  | 0.584  | 1.87E-17 |
| SLC47A1      | 0.107  | 0.453  | 0.59   | 0.755  | 0.406  | 1.90E-17 |
| KIAA0895L    | -0.296 | 0.002  | -0.022 | -1.026 | -0.833 | 1.90E-17 |
| NAV1         | 0.299  | -0.301 | 0.023  | 0.23   | 0.405  | 1.91E-17 |
| CEP55        | -0.165 | -0.452 | -0.52  | 0.06   | 0.013  | 1.91E-17 |
| NR2F6        | -0.239 | -0.415 | -0.109 | 0.18   | 0.585  | 1.95E-17 |
| MT-ND6       | -0.458 | -0.108 | 0.317  | -1.218 | -1.093 | 1.95E-17 |
| ANLN         | -0.33  | -0.606 | -0.621 | -0.194 | -0.346 | 1.99E-17 |
| LYRM7        | -0.423 | -0.36  | -0.217 | -0.331 | -0.752 | 2.02E-17 |
| NF1          | -0.268 | 0.221  | 0.102  | -0.002 | 0.362  | 2.06E-17 |
| CERS6        | 0.242  | 0.071  | -0.231 | -0.165 | -0.71  | 2.09E-17 |
| AGER         | -0.639 | 0.045  | 0.124  | -0.924 | -1.043 | 2.10E-17 |
| ENOSF1       | -0.715 | -0.322 | -0.15  | -0.769 | -0.91  | 2.14E-17 |
| EOGT         | 0.298  | 0.112  | 0.085  | 0.175  | 0.38   | 2.20E-17 |
| RP11-676M6   | 0.277  | 0.051  | 0.041  | 0.289  | 0.689  | 2.26E-17 |
| EFCAB14      | 0.052  | 0.06   | 0.052  | 0.173  | 0.461  | 2.27E-17 |
| TP53I3       | 0.077  | 0.376  | 0.409  | 0.265  | 0.397  | 2.27E-17 |
| GDF6         | 0.053  | 0.672  | 0.721  | 0.611  | 1.424  | 2.30E-17 |
| ABCA5        | -0.313 | 0.471  | 0.547  | 0.164  | -0.163 | 2.30E-17 |
| GLUL         | 0.506  | 0.142  | -0.19  | 0.123  | 0.512  | 2.40E-17 |
| BTBD1        | 0.224  | 0.074  | 0.006  | 0.19   | 0.463  | 2.41E-17 |
| PRPF3        | -0.233 | 0.099  | 0.105  | -0.292 | -0.385 | 2.46E-17 |
| RP11-112J1.  | -0.032 | -0.201 | -0.075 | 0.126  | 0.883  | 2.49E-17 |
| OAS3         | 0.171  | 0.472  | 0.562  | 0.817  | 0.948  | 2.52E-17 |

|            |        |        |        |        |        |          |
|------------|--------|--------|--------|--------|--------|----------|
| FAM160B1   | 0.354  | 0.116  | 0.087  | 0.096  | 0.523  | 2.54E-17 |
| RP5-857K21 | -0.434 | -0.405 | 0.256  | -1.174 | -1.151 | 2.59E-17 |
| TMEM51     | 0.095  | -0.083 | -0.091 | -0.134 | 0.812  | 2.65E-17 |
| DHR SX     | -0.078 | 0.054  | 0.037  | 0.203  | 0.664  | 2.67E-17 |
| NOC3L      | -0.348 | 0.08   | -0.087 | 0.019  | -0.423 | 2.67E-17 |
| ANKRD26    | -0.389 | 0.148  | 0.131  | -0.141 | -0.31  | 2.72E-17 |
| CYP1A1     | 0.244  | -0.383 | -0.528 | -0.712 | -1.625 | 2.74E-17 |
| DHRS1      | -0.728 | 0.015  | 0.118  | -0.12  | 0.529  | 2.79E-17 |
| C5orf24    | 0.017  | -0.117 | -0.026 | 0.177  | 0.432  | 2.89E-17 |
| ZFP36      | -0.229 | 0.228  | -0.301 | -0.394 | -0.81  | 2.89E-17 |
| PEAR1      | -0.184 | 0.093  | 0.474  | 0.217  | 0.49   | 2.92E-17 |
| FCGRT      | -0.08  | -0.102 | -0.042 | 0.173  | 0.483  | 2.96E-17 |
| LOXL2      | 0.296  | 0.087  | -0.011 | 0.466  | 0.927  | 3.04E-17 |
| C22orf29   | -0.072 | 0.032  | 0.116  | -0.051 | -0.399 | 3.15E-17 |
| AC011325.1 | -0.252 | 0.174  | 0.982  | 0.737  | 1.401  | 3.23E-17 |
| ZSCAN2     | 0.125  | 0.284  | 0.172  | 0.568  | 1.064  | 3.25E-17 |
| SEC14L2    | 0.289  | 0.403  | 0.448  | 0.545  | 0.791  | 3.28E-17 |
| ZMIZ2      | -0.261 | 0.009  | 0.276  | 0.041  | 0.38   | 3.31E-17 |
| BCL2A1     | -0.106 | -0.257 | 0.089  | 0.339  | 1.801  | 3.35E-17 |
| FLT4       | -0.071 | -0.217 | -0.075 | 0.065  | 0.988  | 3.45E-17 |
| GNB4       | 0.652  | -0.017 | -0.184 | 0.085  | -0.025 | 3.53E-17 |
| ITPRIP     | -0.161 | -0.045 | -0.035 | 0.052  | 0.494  | 3.54E-17 |
| MBD1       | -0.14  | 0.068  | -0.023 | -0.256 | -0.358 | 3.54E-17 |
| GIMAP4     | -0.308 | -0.26  | -0.033 | 0.447  | 0.125  | 3.83E-17 |
| BCKDHB     | -0.138 | 0.004  | 0.124  | 0.377  | 0.599  | 3.91E-17 |
| COL27A1    | -0.424 | 0.049  | 0.426  | -0.377 | 0.581  | 3.92E-17 |
| DNAJC6     | 0.476  | -0.075 | -0.248 | -0.349 | -0.731 | 3.93E-17 |
| MID2       | -0.282 | 0.047  | 0.088  | 0.294  | 0.605  | 3.97E-17 |
| NEK1       | 0.054  | 0.218  | 0.449  | 0.713  | 0.45   | 3.99E-17 |
| GABBR1     | -0.403 | 0.114  | 0.259  | -0.686 | -0.713 | 3.99E-17 |
| JMJD7      | -0.434 | -0.045 | 0.063  | -0.511 | -1.173 | 4.00E-17 |
| MCM5       | 0.449  | 0.034  | -0.409 | -0.269 | -0.797 | 4.04E-17 |
| PKIA       | 0.038  | 0      | 0.165  | 0.241  | 0.626  | 4.07E-17 |
| CMSS1      | -0.098 | -0.01  | 0.011  | -0.041 | -0.8   | 4.13E-17 |
| ADAT2      | -0.431 | -0.029 | 0.027  | -0.636 | -0.957 | 4.29E-17 |
| RPGRIP1L   | -0.366 | -0.118 | 0.03   | 0.227  | 0.49   | 4.32E-17 |
| ZFYVE9     | 0.123  | -0.178 | 0.025  | 0.358  | 0.59   | 4.45E-17 |
| AGPAT3     | 0.129  | 0.009  | 0.125  | 0.363  | 0.59   | 4.50E-17 |

|            |        |        |        |        |        |          |
|------------|--------|--------|--------|--------|--------|----------|
| CKAP2L     | -0.569 | -0.37  | -0.132 | 0.171  | -0.184 | 4.52E-17 |
| CDK10      | -0.595 | -0.101 | 0.02   | -0.735 | -0.752 | 4.58E-17 |
| MARK4      | -0.003 | 0.08   | 0.013  | 0.096  | 0.586  | 4.68E-17 |
| GPATCH11   | 0.06   | 0.065  | -0.183 | -0.131 | -0.583 | 4.85E-17 |
| LEMD3      | 0.365  | 0.132  | -0.039 | -0.094 | -0.133 | 4.93E-17 |
| CCNH       | -0.108 | -0.048 | -0.111 | 0.008  | -0.469 | 4.96E-17 |
| PLAUR      | 0.124  | -0.07  | 0.018  | 0.291  | 0.634  | 4.98E-17 |
| TELO2      | -0.088 | -0.051 | -0.24  | -0.548 | -0.674 | 4.98E-17 |
| YPEL3      | -0.11  | 0.317  | 0.373  | 0.135  | 0.899  | 5.03E-17 |
| ZNF862     | -0.613 | 0.208  | 0.504  | -0.202 | -0.001 | 5.17E-17 |
| NECAB3     | -0.138 | 0.008  | -0.001 | -0.542 | -0.65  | 5.17E-17 |
| TBC1D22A   | 0.283  | -0.018 | -0.049 | 0.458  | 0.575  | 5.23E-17 |
| CCDC136    | -0.197 | 0.756  | 0.909  | 0.713  | 1.046  | 5.29E-17 |
| HEATR5B    | -0.411 | 0.05   | 0.186  | 0.013  | 0.023  | 5.29E-17 |
| STAT1      | 0.085  | 0.001  | 0.087  | 0.517  | 0.725  | 5.44E-17 |
| CCNI       | 0.309  | 0.23   | 0.204  | 0.456  | 0.586  | 5.47E-17 |
| BCAM       | -0.016 | 0.213  | 0.262  | 0.34   | 0.817  | 5.88E-17 |
| KIAA1109   | -0.404 | -0.029 | 0.248  | 0.202  | 0.408  | 5.92E-17 |
| FBXL3      | 0.528  | 0.184  | 0.018  | 0.252  | 0.327  | 5.97E-17 |
| P4HA3      | 0.192  | 0.068  | 0.028  | 0.248  | 0.876  | 6.07E-17 |
| IQGAP3     | -0.915 | -0.467 | 0.089  | -0.318 | -0.474 | 6.11E-17 |
| KIAA1524   | -0.317 | -0.259 | -0.411 | -0.212 | -0.559 | 6.18E-17 |
| MAF1       | 0.072  | 0.007  | -0.026 | 0.239  | 0.4    | 6.30E-17 |
| RAP2A      | 0.334  | 0.129  | 0.028  | 0.279  | 0.478  | 6.40E-17 |
| ZDHHC3     | 0.029  | -0.034 | -0.058 | 0.101  | 0.396  | 6.65E-17 |
| FKBP14     | 0.169  | -0.005 | -0.252 | -0.159 | -0.369 | 6.71E-17 |
| THEM6      | 0.225  | -0.298 | -0.502 | -0.261 | -0.647 | 6.86E-17 |
| CFAP54     | -0.074 | 0.144  | 0.443  | 0.275  | 0.997  | 7.16E-17 |
| PBX2       | -0.527 | -0.068 | -0.012 | -0.378 | -0.334 | 7.25E-17 |
| VHL        | 0.02   | 0.144  | 0.084  | 0.167  | 0.482  | 7.32E-17 |
| ZNF512B    | -0.398 | -0.076 | -0.02  | -0.234 | -0.435 | 7.36E-17 |
| RP11-45M22 | -0.635 | -0.185 | -0.01  | -1.223 | -1.107 | 7.41E-17 |
| SMYD4      | -0.398 | -0.136 | -0.283 | -0.595 | -0.681 | 7.47E-17 |
| KDM6B      | -0.446 | 0.253  | 0.061  | -0.269 | 0.349  | 7.60E-17 |
| GPCPD1     | 0.009  | 0.007  | -0.054 | -0.342 | -0.742 | 7.60E-17 |
| FGFRL1     | 0.496  | 0.033  | -0.338 | -0.33  | -0.226 | 7.69E-17 |
| ELP5       | -0.236 | -0.154 | -0.244 | -0.245 | -0.516 | 7.80E-17 |
| MEIS2      | -0.369 | 0.009  | -0.681 | -0.646 | -0.808 | 8.12E-17 |

|             |        |        |        |        |        |          |
|-------------|--------|--------|--------|--------|--------|----------|
| AHI1        | -0.165 | 0.061  | 0.054  | -0.364 | -0.746 | 8.40E-17 |
| POLR2G      | -0.122 | -0.104 | -0.034 | -0.2   | -0.602 | 8.57E-17 |
| PXDC1       | 0.349  | -0.175 | -0.207 | -0.05  | -0.073 | 8.65E-17 |
| FAM171A2    | 0.196  | 0.083  | -0.363 | -0.12  | 0.805  | 8.67E-17 |
| CBX2        | 0.183  | 0.04   | -0.419 | -0.623 | -0.339 | 8.87E-17 |
| MIR34AHG    | 0.885  | 0.856  | 1.141  | -0.114 | 0.358  | 8.93E-17 |
| RP13-88F20  | 0.338  | -0.077 | -0.056 | 0.38   | 0.777  | 9.04E-17 |
| ZNF7        | -0.125 | 0.205  | 0.092  | -0.505 | -0.435 | 9.04E-17 |
| RALGAPA2    | -0.257 | -0.141 | 0.05   | 0.03   | 0.59   | 9.07E-17 |
| ATP6V0E2    | -0.222 | -0.068 | 0.118  | 0.471  | 0.554  | 9.30E-17 |
| RP13-138P1  | 0.078  | -0.261 | 0.103  | 0.598  | 1.197  | 9.33E-17 |
| CWC25       | -0.042 | 0.144  | -0.096 | -0.202 | -0.501 | 9.42E-17 |
| APBB1       | 0.126  | 0.106  | 0.214  | 0.454  | 0.717  | 9.67E-17 |
| TCTN3       | 0.133  | 0.061  | 0.094  | 0.433  | 0.695  | 9.83E-17 |
| DPY19L1     | 0.337  | -0.041 | -0.31  | -0.127 | -0.278 | 9.85E-17 |
| TLR3        | 0.574  | 0.664  | 0.71   | 1.038  | 1.41   | 9.96E-17 |
| NOP2        | -0.14  | 0.003  | -0.03  | -0.136 | -0.516 | 1.02E-16 |
| HIRIP3      | 0.058  | -0.002 | -0.032 | 0.248  | -0.794 | 1.02E-16 |
| MT-ND4      | -0.545 | -0.378 | 0.307  | -1.169 | -0.918 | 1.02E-16 |
| SAMHD1      | 0.184  | 0.117  | 0.142  | 0.518  | 0.858  | 1.03E-16 |
| RNF103      | 0.52   | 0.299  | 0.015  | -0.026 | 0.399  | 1.03E-16 |
| CISD2       | -0.064 | -0.136 | -0.161 | -0.396 | -0.815 | 1.06E-16 |
| LINC00340   | -0.412 | 0.322  | 0.06   | 0.119  | 1.39   | 1.08E-16 |
| RBM15B      | 0.172  | -0.023 | -0.037 | 0.32   | 0.64   | 1.10E-16 |
| SQRDL       | 0.222  | 0.138  | 0.254  | 0.682  | 0.668  | 1.11E-16 |
| TRIM41      | -0.307 | -0.033 | 0.084  | -0.384 | -0.6   | 1.11E-16 |
| GNB3        | -0.621 | -0.345 | -0.145 | -1.261 | -1.067 | 1.15E-16 |
| GPR162      | -0.423 | -0.128 | 0.369  | 0.256  | 0.837  | 1.16E-16 |
| CLASRP      | -0.194 | -0.026 | -0.071 | -0.625 | -0.685 | 1.18E-16 |
| WIPI2       | 0.21   | 0.209  | 0.198  | 0.428  | 0.726  | 1.19E-16 |
| ARHGAP18    | -0.013 | -0.11  | -0.41  | -0.33  | -0.464 | 1.19E-16 |
| ECT2        | -0.298 | -0.473 | -0.322 | -0.087 | -0.314 | 1.21E-16 |
| PLCD3       | 0.554  | 0.273  | 0.265  | 0.416  | 0.685  | 1.22E-16 |
| GSTA4       | -0.04  | -0.132 | -0.219 | -0.204 | -0.839 | 1.23E-16 |
| C22orf46    | -0.547 | 0.011  | 0.469  | -0.207 | -0.804 | 1.25E-16 |
| RP11-456J2( | -1.11  | -1.759 | -1.338 | -1.29  | -0.819 | 1.27E-16 |
| STIM2       | 0.002  | -0.225 | -0.248 | -0.259 | -0.663 | 1.29E-16 |
| TLL1        | 0.608  | 0.014  | -0.402 | -0.464 | -0.784 | 1.32E-16 |

|            |        |        |        |        |        |          |
|------------|--------|--------|--------|--------|--------|----------|
| C16orf45   | -0.148 | -0.217 | -0.219 | 0.054  | 0.509  | 1.33E-16 |
| HNRNPH1    | 0.018  | 0.101  | 0.155  | -0.181 | -0.347 | 1.33E-16 |
| MAPKAP1    | 0.21   | 0.018  | -0.008 | 0.286  | 0.426  | 1.34E-16 |
| PHKA1      | 0.027  | -0.103 | -0.156 | -0.145 | -0.752 | 1.34E-16 |
| TCEANC2    | -0.832 | -0.164 | 0.036  | -0.309 | -0.429 | 1.35E-16 |
| UVRAG      | -0.029 | -0.094 | 0.07   | 0.14   | 0.428  | 1.36E-16 |
| TYRO3      | 0.387  | 0.029  | -0.252 | -0.095 | -0.336 | 1.37E-16 |
| REPS2      | 0.396  | 0.143  | 0.256  | 0.706  | 0.91   | 1.38E-16 |
| PPP1R16B   | -0.176 | -0.208 | -0.303 | -0.398 | 0.44   | 1.38E-16 |
| SNHG3      | -0.156 | -0.126 | 0.024  | -0.88  | -1.03  | 1.38E-16 |
| RP13-331H1 | -0.431 | -1.026 | -1.111 | -0.53  | -0.034 | 1.40E-16 |
| IFT172     | -0.497 | -0.161 | 0.191  | 0.098  | 0.053  | 1.42E-16 |
| SMEK1      | 0.374  | 0.353  | 0.315  | 0.167  | 0.107  | 1.43E-16 |
| PSMD2      | 0.402  | 0.224  | 0.21   | 0.641  | 0.9    | 1.45E-16 |
| EPS8L1     | -0.348 | -0.179 | -0.085 | -0.397 | 0.582  | 1.45E-16 |
| FAM212B    | 1.646  | 1.532  | 1.434  | 1.13   | 1.716  | 1.47E-16 |
| HEMK1      | -0.543 | 0.23   | 0.542  | -0.136 | -0.314 | 1.47E-16 |
| THAP7      | -0.254 | -0.155 | -0.316 | -0.176 | -0.876 | 1.50E-16 |
| AP1G2      | -0.55  | 0.089  | 0.472  | -0.028 | 0.05   | 1.51E-16 |
| ZNF646     | -0.077 | 0.126  | -0.062 | -0.422 | -0.447 | 1.52E-16 |
| ZNF217     | 0.331  | 0.217  | 0.233  | 0.329  | 0.67   | 1.53E-16 |
| SEPT9      | 0.207  | -0.141 | -0.027 | 0.493  | 0.652  | 1.53E-16 |
| DNASE1     | -0.697 | -0.088 | 0.306  | -0.472 | -0.277 | 1.54E-16 |
| RP5-1042K1 | -0.607 | 0.088  | 0.14   | -0.902 | -0.668 | 1.61E-16 |
| ADAMTS6    | -0.637 | 0.02   | -0.235 | -0.807 | -0.75  | 1.62E-16 |
| CPA4       | -0.055 | 0.71   | 0.918  | 0.955  | 0.631  | 1.66E-16 |
| PLEKHM1    | -0.169 | 0.139  | 0.218  | 0.414  | 0.507  | 1.66E-16 |
| PDCL       | 0.395  | 0.074  | 0.16   | 0.451  | 0.661  | 1.71E-16 |
| PPOX       | -0.956 | -0.102 | 0.084  | -0.209 | -0.217 | 1.74E-16 |
| DERL2      | -0.001 | -0.057 | -0.09  | -0.171 | -0.574 | 1.74E-16 |
| PHF21A     | -0.436 | -0.002 | 0.164  | -0.015 | 0.429  | 1.75E-16 |
| SRRM2      | -0.248 | 0.02   | 0.144  | -0.459 | -0.386 | 1.75E-16 |
| METRNL     | 0.813  | 0.055  | 0.05   | 0.435  | 0.329  | 1.77E-16 |
| CYTH3      | 0.412  | 0.101  | 0.073  | 0.304  | 0.586  | 1.82E-16 |
| KIAA0753   | -0.577 | 0.129  | 0.149  | -0.055 | -0.016 | 1.83E-16 |
| SLC44A4    | 0.061  | 0.22   | 0.313  | 0.438  | 1.168  | 1.88E-16 |
| SEPT6      | 0.292  | -0.038 | -0.048 | 0.301  | 0.855  | 1.89E-16 |
| MT-CO3     | -0.481 | -0.348 | 0.264  | -1.187 | -1.035 | 1.90E-16 |

|            |        |        |        |        |        |          |
|------------|--------|--------|--------|--------|--------|----------|
| DLGAP1     | 0.156  | -0.211 | -0.335 | 0.308  | 0.798  | 1.92E-16 |
| RASAL3     | -0.108 | -0.053 | 0.186  | 0.066  | 0.609  | 1.93E-16 |
| LAMP1      | 0.291  | 0.128  | -0.003 | 0.448  | 0.708  | 1.94E-16 |
| FAM122B    | -0.323 | -0.037 | 0.05   | -0.277 | -0.495 | 1.96E-16 |
| EEF2       | 0.383  | 0.255  | 0.243  | 0.61   | 0.923  | 1.97E-16 |
| KLHL8      | 0.236  | -0.051 | -0.218 | -0.157 | -0.539 | 2.00E-16 |
| SH3BP5L    | -0.052 | 0.144  | 0.112  | 0.268  | 0.589  | 2.02E-16 |
| TYMS       | 0.32   | 0.44   | 0.386  | 0.601  | 0.305  | 2.02E-16 |
| RASSF9     | 1.096  | 0.352  | 0.629  | 0.863  | 1.016  | 2.04E-16 |
| GSK3B      | 0.301  | 0.177  | 0.169  | 0.422  | 0.762  | 2.05E-16 |
| DNAJB6     | 0.175  | 0.045  | 0.052  | 0.324  | 0.645  | 2.06E-16 |
| SIPA1L1    | 0.101  | 0.101  | 0.261  | 0.228  | 0.629  | 2.11E-16 |
| TICRR      | -0.664 | -0.547 | -0.584 | -0.873 | -0.968 | 2.12E-16 |
| PHF13      | 0.305  | 0.16   | -0.337 | -0.211 | -0.092 | 2.14E-16 |
| PDSS1      | 0.15   | 0.009  | -0.242 | -0.351 | -0.773 | 2.14E-16 |
| GSTT2B     | -0.803 | -0.03  | 0.144  | -0.564 | -0.96  | 2.14E-16 |
| GOLM1      | 0.16   | 0.021  | -0.088 | 0.196  | 0.602  | 2.16E-16 |
| STK24      | 0.457  | 0.013  | -0.1   | 0.146  | 0.115  | 2.16E-16 |
| THAP12     | 0.154  | 0.078  | -0.137 | -0.172 | -0.348 | 2.18E-16 |
| TCF25      | 0.048  | 0.089  | 0.033  | -0.231 | -0.343 | 2.19E-16 |
| ZNF37B     | -0.681 | 0.017  | 0.177  | -0.752 | -0.568 | 2.21E-16 |
| RRAGA      | 0.266  | -0.039 | -0.008 | 0.561  | 0.659  | 2.23E-16 |
| TRIM32     | 0.631  | 0.408  | 0.337  | 0.478  | 0.767  | 2.33E-16 |
| CTD-2263F2 | -0.175 | 0.185  | 0.796  | 0.601  | 1.705  | 2.34E-16 |
| CYSTM1     | 0.044  | 0.044  | 0.124  | 0.218  | 0.638  | 2.34E-16 |
| DLEU2      | -0.552 | -0.445 | -0.232 | -0.765 | -1.357 | 2.40E-16 |
| RPH3AL     | 0.059  | -0.224 | 0.317  | 0.821  | 0.691  | 2.41E-16 |
| GTF2I      | -0.001 | -0.179 | -0.03  | 0.144  | 0.605  | 2.43E-16 |
| LANCL1     | 0.189  | 0.136  | -0.043 | 0.293  | 0.544  | 2.50E-16 |
| RHBDF1     | -0.21  | 0.17   | 0.228  | -0.143 | 0.461  | 2.54E-16 |
| RRBP1      | 0.349  | 0.069  | 0.052  | 0.307  | 0.694  | 2.55E-16 |
| YAP1       | 0.378  | -0.111 | -0.31  | -0.192 | -0.381 | 2.58E-16 |
| TIMM17A    | 0.173  | -0.021 | -0.095 | -0.075 | -0.452 | 2.68E-16 |
| TRAF4      | 0.474  | 0.464  | 0.41   | -0.138 | 0.512  | 2.71E-16 |
| TMEM106A   | -0.39  | 0.078  | 0.16   | 0.066  | -0.598 | 2.71E-16 |
| PCDHGA4    | 0.427  | 0.376  | 0.062  | 0.478  | 1.436  | 2.72E-16 |
| TMEM33     | 0.007  | 0.023  | -0.221 | -0.148 | -0.426 | 2.72E-16 |
| AHDC1      | -0.324 | 0.211  | 0.025  | -0.301 | 0.418  | 2.73E-16 |

|            |        |        |        |        |        |          |
|------------|--------|--------|--------|--------|--------|----------|
| LINC00346  | -0.428 | 0.07   | 0.442  | 0.532  | 0.522  | 2.82E-16 |
| MFGE8      | 0.176  | 0.123  | 0.069  | 0.294  | 0.665  | 2.87E-16 |
| EFR3A      | 0.169  | 0.028  | 0.003  | 0.29   | 0.515  | 2.88E-16 |
| ACSL4      | 0.462  | 0.169  | 0.143  | 0.532  | 0.775  | 2.90E-16 |
| TOMM34     | 0.115  | -0.063 | -0.026 | 0.308  | 0.66   | 2.91E-16 |
| ATP10D     | 0.094  | 0.386  | 0.08   | -0.065 | -0.051 | 2.98E-16 |
| MTMR9L     | -0.712 | -0.217 | 0.319  | -0.375 | 0.673  | 3.03E-16 |
| ACYP1      | -0.224 | -0.199 | -0.009 | -0.147 | -0.812 | 3.06E-16 |
| MAPK11     | -0.242 | 0.172  | 0.156  | -0.327 | -0.329 | 3.07E-16 |
| C7orf43    | -0.375 | 0.177  | -0.13  | -0.725 | -0.47  | 3.08E-16 |
| RCBTB1     | 0.138  | 0.329  | 0.302  | 0.185  | 0.477  | 3.20E-16 |
| MMAB       | 0.114  | -0.139 | -0.396 | -0.536 | -0.382 | 3.22E-16 |
| TXNDC5     | 0.161  | -0.051 | -0.265 | 0.081  | -0.56  | 3.23E-16 |
| TIMM23B    | -0.003 | 0.091  | -0.043 | -0.635 | -0.671 | 3.23E-16 |
| AACS       | 0.371  | 0.115  | 0.056  | 0.208  | 0.676  | 3.28E-16 |
| DNMT3B     | -0.979 | -0.722 | -0.62  | -0.747 | -1.208 | 3.30E-16 |
| ZNF248     | -0.819 | 0.033  | -0.058 | -0.622 | -0.493 | 3.31E-16 |
| RIOK3      | 0.502  | 0.332  | 0.257  | 0.214  | 0.254  | 3.34E-16 |
| TST        | -0.053 | -0.034 | 0.078  | 0.401  | 0.679  | 3.53E-16 |
| FAHD2A     | -0.127 | 0.151  | -0.009 | -0.031 | -0.56  | 3.55E-16 |
| ATP6AP1    | 0.138  | 0.03   | -0.051 | 0.342  | 0.61   | 3.57E-16 |
| PPP1R15A   | 0.428  | 0.406  | 0.213  | 0.222  | 0.18   | 3.65E-16 |
| ZNF384     | -0.133 | 0.099  | 0.055  | -0.244 | -0.421 | 3.66E-16 |
| ZBTB4      | 0.138  | 0.043  | 0.195  | 0.409  | 0.749  | 3.76E-16 |
| CYGB       | -0.149 | -0.006 | 0.896  | 0.947  | 1.658  | 3.81E-16 |
| BRCA1      | 0.028  | 0.14   | 0.021  | 0.027  | -0.579 | 3.85E-16 |
| RP11-39C10 | 0.487  | -0.164 | -0.289 | -0.036 | -0.585 | 3.86E-16 |
| TPD52L2    | 0.2    | -0.03  | -0.049 | 0.219  | 0.52   | 4.07E-16 |
| LRRC14     | -0.227 | 0.048  | -0.145 | -0.4   | -0.398 | 4.12E-16 |
| USP13      | 0.075  | -0.432 | -0.565 | -0.117 | -0.085 | 4.21E-16 |
| HIBADH     | 0.252  | -0.039 | -0.093 | 0.222  | 0.451  | 4.23E-16 |
| CHAC2      | -0.483 | -0.186 | -0.255 | -0.527 | -0.89  | 4.33E-16 |
| DARS       | 0.321  | 0.137  | 0.227  | 0.661  | 0.647  | 4.38E-16 |
| PEX6       | -0.128 | 0.065  | 0.398  | 0.348  | 0.477  | 4.38E-16 |
| YY1        | 0.337  | 0.024  | -0.047 | 0.219  | 0.585  | 4.39E-16 |
| SGMS1      | 0.463  | -0.096 | -0.029 | 0.05   | -0.041 | 4.53E-16 |
| TOB2       | 0.525  | 0.274  | -0.029 | 0.172  | 0.486  | 4.60E-16 |
| CDK1       | -0.58  | -0.475 | -0.509 | -0.371 | -0.709 | 4.60E-16 |



|            |        |        |        |        |        |          |
|------------|--------|--------|--------|--------|--------|----------|
| RAD51C     | 0.041  | 0.182  | 0.261  | 0.323  | -0.352 | 4.68E-16 |
| ATXN1      | -0.318 | -0.41  | -0.517 | -0.282 | 0.196  | 4.72E-16 |
| GBGT1      | -0.244 | 0.126  | 0.364  | 0.336  | 0.384  | 4.81E-16 |
| PTPRG      | 0.365  | 0.033  | -0.16  | 0.032  | -0.522 | 4.99E-16 |
| SH2D5      | -0.533 | 0.085  | 0.616  | 0.551  | 0.815  | 5.14E-16 |
| CAST       | 0.347  | 0.224  | 0.2    | 0.517  | 0.71   | 5.39E-16 |
| GBAP1      | -0.819 | 0.095  | 0.43   | -0.429 | -0.398 | 5.39E-16 |
| FOCAD      | 0.328  | 0.01   | 0.073  | 0.379  | 0.693  | 5.70E-16 |
| SLC18B1    | -0.186 | -0.341 | -0.164 | 0.089  | 0.604  | 5.76E-16 |
| SUV39H2    | -0.209 | -0.139 | -0.279 | -0.425 | -0.779 | 5.77E-16 |
| RP11-904M1 | -0.396 | 0.271  | 0.079  | -1.1   | -0.93  | 5.78E-16 |
| RABGGTB    | 0.06   | 0.084  | 0.085  | -0.33  | -0.691 | 6.02E-16 |
| ANP32E     | 0.151  | -0.093 | -0.239 | 0.08   | -0.757 | 6.02E-16 |
| PLXND1     | 0.401  | -0.225 | -0.297 | -0.166 | 0.149  | 6.03E-16 |
| DLG4       | -0.57  | -0.16  | -0.145 | -0.619 | -0.474 | 6.13E-16 |
| RP11-221N1 | -0.525 | 0.156  | 0.553  | 0.462  | 0.705  | 6.15E-16 |
| GJA1       | 0.313  | 0.066  | -0.101 | 0.157  | 0.374  | 6.25E-16 |
| LDHB       | 0.303  | 0.042  | -0.033 | 0.42   | 0.539  | 6.38E-16 |
| MT-CO2     | -0.447 | -0.328 | 0.264  | -1.175 | -0.944 | 6.49E-16 |
| ACOT2      | 0.096  | 0.209  | 0.245  | 0.47   | 1.11   | 6.55E-16 |
| MT-CO1     | -0.551 | -0.382 | 0.271  | -1.163 | -0.901 | 6.55E-16 |
| TSPAN9     | 0.231  | 0.001  | -0.135 | 0.165  | 0.495  | 6.56E-16 |
| NRK        | 0.122  | -0.07  | 0.074  | 0.364  | 0.696  | 6.78E-16 |
| SOCS6      | 0.178  | -0.165 | -0.305 | -0.057 | 0.372  | 7.02E-16 |
| RP11-452L6 | -0.813 | 0.124  | 0.175  | -0.136 | -0.474 | 7.02E-16 |
| RP11-419C5 | -0.243 | -0.043 | 0.004  | -1.311 | -0.842 | 7.05E-16 |
| SPRYD7     | 0.192  | 0      | -0.18  | -0.104 | -0.454 | 7.10E-16 |
| CD109      | 0.278  | 0.044  | -0.087 | 0.176  | 0.703  | 7.11E-16 |
| HIF1A      | 0.219  | 0.084  | 0.114  | 0.442  | 0.776  | 7.15E-16 |
| AC034193.5 | -0.086 | 0.027  | -0.161 | -0.703 | -1.088 | 7.16E-16 |
| CTD-2571E1 | -1.068 | -2.063 | -1.417 | -0.8   | -0.816 | 7.19E-16 |
| ZNF839     | -0.732 | -0.079 | 0.149  | -0.254 | -0.488 | 7.24E-16 |
| CLIP4      | -0.089 | 0.118  | 0.359  | 0.372  | 0.515  | 7.35E-16 |
| CASP2      | 0.422  | -0.032 | -0.217 | -0.069 | -0.066 | 7.37E-16 |
| ZNF362     | 0.32   | -0.178 | -0.183 | 0.056  | 0.572  | 7.39E-16 |
| CSAD       | -0.459 | 0.02   | 0.23   | -0.752 | -0.724 | 7.42E-16 |
| GGA1       | -0.244 | 0.016  | 0.151  | -0.088 | -0.373 | 7.49E-16 |
| TUFT1      | 0.776  | 0.258  | 0.014  | 0.276  | 0.917  | 7.63E-16 |

|            |        |        |        |        |        |          |
|------------|--------|--------|--------|--------|--------|----------|
| RAPGEF1    | 0.49   | 0.094  | -0.043 | 0.038  | 0.294  | 7.70E-16 |
| VPS39      | 0.069  | 0.208  | 0.166  | 0.219  | 0.463  | 7.77E-16 |
| MTHFSD     | -0.586 | -0.001 | 0.162  | -0.199 | -0.274 | 7.94E-16 |
| ARRDC2     | 0.437  | 0.307  | 0.002  | -0.377 | -0.122 | 8.02E-16 |
| PLSCR4     | 0.058  | 0.172  | -0.043 | 0.056  | -0.525 | 8.13E-16 |
| PDE10A     | 0.302  | 0.005  | -0.514 | -0.571 | -0.099 | 8.18E-16 |
| RBBP6      | 0.384  | 0.226  | 0.16   | 0.033  | -0.121 | 8.25E-16 |
| P4HA2      | 0.282  | 0.214  | 0.156  | 0.614  | 0.78   | 8.29E-16 |
| KLHL42     | 0.245  | 0.056  | 0.087  | -0.027 | 0.503  | 8.42E-16 |
| DIP2A      | -0.454 | 0.043  | 0.127  | -0.207 | 0.034  | 8.54E-16 |
| C1orf52    | 0.008  | 0.379  | 0.163  | -0.286 | -0.336 | 8.54E-16 |
| ITGB5      | 0.263  | -0.011 | -0.07  | 0.368  | 0.627  | 8.76E-16 |
| MT-TQ      | -0.189 | -0.013 | 0.297  | -1.278 | -1.155 | 8.78E-16 |
| EXT1       | 0.264  | -0.138 | -0.34  | -0.028 | 0.319  | 8.80E-16 |
| IPO7       | 0.325  | 0.244  | 0.189  | 0.365  | 0.558  | 8.83E-16 |
| PHLDA2     | 0.227  | -0.024 | -0.254 | -0.149 | 0.584  | 8.94E-16 |
| UBXN7      | 0.247  | 0.308  | 0.129  | 0.121  | 0.54   | 8.94E-16 |
| FOXA1      | 0.291  | -0.29  | -0.461 | -0.436 | 1.001  | 9.02E-16 |
| HHIPL1     | 0.219  | 0.146  | 0.492  | 0.708  | 1.269  | 9.20E-16 |
| GIMAP7     | -0.414 | -0.168 | -0.436 | -0.073 | -0.777 | 9.28E-16 |
| PDGFA      | 0.523  | 0.332  | 0.554  | 0.584  | 0.337  | 9.45E-16 |
| IGF2BP3    | -0.227 | -0.316 | -0.383 | -0.42  | -0.306 | 9.45E-16 |
| TMEM209    | 0.227  | 0.11   | -0.063 | -0.106 | -0.507 | 9.65E-16 |
| LSS        | 0.232  | -0.166 | -0.362 | -0.461 | -0.166 | 9.71E-16 |
| MAP3K5     | 0.412  | -0.123 | -0.204 | 0.073  | 0.009  | 9.77E-16 |
| LRRC32     | 0.606  | -0.123 | -0.049 | 0.281  | -0.065 | 9.77E-16 |
| NLGN1      | 0.291  | 0.011  | 0.241  | 0.604  | 0.923  | 9.82E-16 |
| RP11-117P2 | -0.479 | 0.025  | 0.442  | -0.021 | 0.463  | 1.00E-15 |
| ZNF702P    | -0.368 | -0.029 | 0.44   | 0.319  | 0.398  | 1.01E-15 |
| DERL3      | -0.194 | -0.573 | -0.567 | -0.977 | -1.947 | 1.03E-15 |
| PMS1       | -0.466 | -0.011 | 0.125  | -0.087 | -0.468 | 1.07E-15 |
| MGST1      | 0.042  | -0.01  | 0.009  | -0.068 | -0.97  | 1.07E-15 |
| CD200      | -0.108 | -0.143 | -0.163 | 0.183  | 1.263  | 1.09E-15 |
| LAMA3      | -0.028 | 0.448  | 0.646  | 0.53   | 0.999  | 1.11E-15 |
| EPOR       | -0.313 | -0.217 | 0.102  | 0.318  | 0.596  | 1.11E-15 |
| DDR2       | -0.259 | -0.089 | 0.141  | 0.004  | 0.877  | 1.17E-15 |
| MT-RNR2    | -0.797 | -0.373 | 0.247  | -1.301 | -0.714 | 1.20E-15 |
| UBE2G1     | 0.207  | -0.024 | -0.216 | 0.074  | 0.442  | 1.22E-15 |

|              |        |        |        |        |        |          |
|--------------|--------|--------|--------|--------|--------|----------|
| ARSJ         | -0.368 | -0.208 | -0.246 | -0.044 | 0.163  | 1.24E-15 |
| UCP2         | -0.179 | 0.376  | 0.55   | 1.131  | 0.682  | 1.26E-15 |
| ICE2         | -0.281 | 0.016  | 0.076  | -0.06  | -0.456 | 1.26E-15 |
| CTD-2574D2   | -0.576 | 0.073  | 0.159  | -1.158 | -0.726 | 1.26E-15 |
| RP5-857K21   | -0.513 | -0.441 | 0.203  | -1.346 | -1.169 | 1.26E-15 |
| PSEN1        | 0.145  | 0.3    | 0.179  | 0.311  | 0.51   | 1.33E-15 |
| INPP5K       | 0.3    | -0.012 | -0.187 | -0.047 | -0.447 | 1.33E-15 |
| MUTYH        | -0.48  | -0.075 | -0.042 | -0.444 | -0.869 | 1.35E-15 |
| ZNF521       | 0.344  | 0.045  | 0.176  | 0.625  | 0.794  | 1.36E-15 |
| LARP1B       | 0.299  | 0.22   | 0.027  | -0.081 | -0.337 | 1.36E-15 |
| PHC3         | -0.036 | 0.197  | 0.093  | -0.247 | -0.333 | 1.38E-15 |
| STAT6        | -0.06  | 0.033  | 0.198  | 0.225  | 0.401  | 1.41E-15 |
| SS18L1       | 0.205  | 0.198  | 0.062  | -0.633 | -0.63  | 1.41E-15 |
| USP21        | -0.544 | -0.154 | -0.032 | -0.35  | -0.478 | 1.42E-15 |
| RPA2         | 0.199  | 0.025  | -0.217 | -0.114 | -0.448 | 1.45E-15 |
| FAM134C      | -0.046 | 0.251  | 0.23   | 0.181  | 0.534  | 1.46E-15 |
| ST3GAL4-AS1  | -0.839 | -0.363 | 0.355  | 0.032  | 0.478  | 1.46E-15 |
| NPHP4        | -0.039 | -0.211 | -0.137 | -0.419 | -0.69  | 1.46E-15 |
| KANK2        | 0.211  | 0.11   | 0.441  | 0.102  | 0.279  | 1.47E-15 |
| POP7         | -0.007 | -0.225 | -0.196 | -0.158 | -0.581 | 1.48E-15 |
| SHROOM1      | -0.781 | -0.172 | -0.02  | -0.525 | -0.165 | 1.50E-15 |
| ZNF274       | 0.007  | 0.007  | 0.418  | 0.337  | 0.409  | 1.53E-15 |
| ARHGAP4      | -0.157 | -0.424 | -0.132 | -0.403 | 0.331  | 1.53E-15 |
| MAPK8IP3     | -0.647 | -0.067 | -0.058 | -1.02  | -0.61  | 1.54E-15 |
| NOTCH2       | 0.069  | 0.064  | 0.04   | 0.196  | 0.655  | 1.56E-15 |
| DOK3         | -0.435 | -0.039 | -0.273 | -1.384 | -0.82  | 1.58E-15 |
| DHCR7        | 0.347  | -0.147 | -0.56  | -0.407 | -0.191 | 1.61E-15 |
| ARL13B       | 0.203  | 0.117  | -0.403 | -0.353 | -0.509 | 1.62E-15 |
| RECQL5       | -0.614 | 0.057  | 0.271  | -0.205 | -0.229 | 1.65E-15 |
| DDX1         | 0.389  | 0.118  | 0.099  | 0.532  | 0.694  | 1.68E-15 |
| GOLGA1       | -0.329 | -0.086 | 0.098  | -0.219 | -0.586 | 1.69E-15 |
| TCAF1        | 0.362  | -0.096 | -0.247 | -0.322 | -0.295 | 1.74E-15 |
| STX1A        | -0.077 | -0.353 | -0.145 | -0.539 | -0.85  | 1.78E-15 |
| RP11-417L1.1 | -0.204 | -0.847 | -0.671 | -0.097 | 0.152  | 1.79E-15 |
| CRIP1        | -0.062 | -0.175 | -0.216 | -0.32  | -1.095 | 1.80E-15 |
| VGLL3        | 0.641  | 0.136  | 0.227  | 0.537  | 0.306  | 1.83E-15 |
| GOLPH3       | 0.45   | 0.103  | -0.078 | 0.135  | 0.2    | 1.83E-15 |
| PIDD1        | -0.072 | 0.509  | 0.455  | -0.274 | -0.081 | 1.89E-15 |

|            |        |        |        |        |        |          |
|------------|--------|--------|--------|--------|--------|----------|
| ISG20      | 0.137  | -0.042 | 0.156  | 0.458  | 1.412  | 1.94E-15 |
| SLC43A2    | 0.28   | -0.274 | -0.319 | 0.074  | 0.446  | 1.96E-15 |
| TRIM59     | -0.771 | -0.695 | -0.419 | -0.285 | -0.429 | 2.01E-15 |
| BMP2R      | 0.554  | 0.221  | -0.314 | -0.184 | -0.365 | 2.04E-15 |
| PLPP1      | 0.27   | 0.177  | -0.091 | -0.045 | -0.621 | 2.07E-15 |
| C5orf42    | -0.438 | 0.226  | 0.16   | -0.28  | -0.316 | 2.16E-15 |
| PLEKHM1P   | -0.175 | 0.141  | 0.081  | -0.923 | -0.699 | 2.16E-15 |
| FGF12      | -0.173 | -0.248 | -0.94  | -0.944 | -1.232 | 2.18E-15 |
| SLC26A2    | 0.344  | -0.139 | -0.146 | 0.076  | -0.234 | 2.23E-15 |
| GEN1       | -0.275 | -0.186 | -0.19  | -0.535 | -0.67  | 2.26E-15 |
| TOP2B      | 0.297  | 0.14   | 0.116  | 0.541  | 0.821  | 2.33E-15 |
| CDR2L      | 0.312  | 0.097  | 0.022  | 0.164  | 0.806  | 2.33E-15 |
| HDGF       | 0.149  | 0.025  | -0.011 | 0.311  | 0.562  | 2.33E-15 |
| RP11-371A2 | 0.127  | 0.063  | 0.077  | 0.207  | 0.351  | 2.33E-15 |
| SUGT1P     | 0.286  | 0.007  | 0.05   | -0.275 | -1.128 | 2.33E-15 |
| FBXW2      | 0.049  | 0.128  | 0.204  | 0.2    | 0.391  | 2.39E-15 |
| RP11-802E1 | 0.063  | 0.385  | 0.387  | -0.833 | -0.256 | 2.42E-15 |
| MAP7D1     | 0.191  | -0.011 | -0.05  | 0.223  | 0.575  | 2.44E-15 |
| SIK2       | 0.142  | 0.123  | -0.067 | 0.053  | 0.575  | 2.44E-15 |
| BAMBI      | 0.659  | -0.199 | -0.411 | -0.047 | -0.51  | 2.44E-15 |
| FAM60A     | 0.125  | -0.025 | 0.013  | 0.215  | 0.577  | 2.47E-15 |
| ARIH1      | 0.209  | 0.264  | 0.007  | 0.147  | 0.523  | 2.48E-15 |
| PNKP       | -0.363 | -0.081 | 0.003  | -0.523 | -0.66  | 2.54E-15 |
| FAM118A    | -0.408 | -0.034 | 0.11   | -0.713 | -0.544 | 2.55E-15 |
| PAK4       | 0.098  | -0.258 | -0.202 | 0.278  | 0.582  | 2.60E-15 |
| FGD5       | 0.085  | -0.224 | -0.011 | 0.291  | 0.495  | 2.62E-15 |
| CRAT       | 0.059  | 0.12   | 0.148  | 0.434  | 0.466  | 2.68E-15 |
| STAT3      | 0.427  | 0.339  | 0.334  | 0.604  | 0.836  | 2.69E-15 |
| SUGP2      | -0.468 | -0.077 | -0.041 | -0.812 | -0.645 | 2.74E-15 |
| USP46      | 0.384  | 0.354  | 0.231  | 0.193  | 0.644  | 2.82E-15 |
| GPR153     | -0.303 | -0.061 | 0.046  | -0.111 | 0.732  | 2.88E-15 |
| MBTPS1     | 0.146  | 0.039  | 0.016  | 0.229  | 0.41   | 2.88E-15 |
| ABI2       | -0.126 | -0.153 | 0.083  | 0.079  | 0.345  | 3.00E-15 |
| KIAA1324   | 0.237  | 0.417  | 0.678  | 0.982  | 0.825  | 3.02E-15 |
| ABCA7      | -1.134 | -0.403 | 0.316  | -0.201 | -0.054 | 3.17E-15 |
| RFX3       | -0.473 | 0.116  | 0.334  | 0.285  | 0.745  | 3.18E-15 |
| ERP29      | 0.2    | 0.096  | 0.057  | 0.436  | 0.541  | 3.29E-15 |
| ARID1B     | 0.061  | -0.065 | -0.197 | -0.006 | 0.456  | 3.31E-15 |

|          |        |        |        |        |        |          |
|----------|--------|--------|--------|--------|--------|----------|
| FAM43A   | -0.434 | 0.004  | 0.094  | 0.165  | 0.346  | 3.33E-15 |
| LTB4R2   | -0.681 | 0.097  | 0.223  | -0.792 | -0.671 | 3.33E-15 |
| HERPUD2  | 0.4    | 0.231  | 0.065  | 0.302  | 0.501  | 3.34E-15 |
| TIMM8A   | -0.163 | -0.042 | 0.022  | -0.305 | -0.769 | 3.38E-15 |
| GPT2     | -0.186 | -0.076 | -0.017 | 0.311  | 0.486  | 3.48E-15 |
| POSTN    | 0.212  | 0.188  | -0.047 | 0.307  | -1.011 | 3.50E-15 |
| ZHX1     | 0.3    | 0.115  | -0.094 | 0.098  | -0.367 | 3.51E-15 |
| MIS18BP1 | -0.34  | -0.446 | -0.342 | -0.109 | -0.128 | 3.58E-15 |
| GSDMC    | -0.129 | -0.234 | 0.263  | 0.317  | 0.885  | 3.62E-15 |
| NPIPB4   | -0.56  | -0.404 | -0.051 | -1.197 | -0.896 | 3.62E-15 |
| ANKS1A   | -0.8   | -0.465 | -0.047 | -0.021 | -0.145 | 3.64E-15 |
| PPP1R18  | -0.102 | 0.024  | 0.115  | 0.235  | 0.395  | 3.71E-15 |
| AKAP17A  | -0.261 | 0.157  | 0.073  | -0.614 | -0.509 | 3.73E-15 |
| IL17D    | -0.038 | 0.052  | 0.069  | 0.136  | 0.879  | 3.78E-15 |
| C11orf49 | 0.145  | -0.021 | -0.106 | 0.279  | 0.578  | 3.79E-15 |
| ZNF664   | 0.287  | 0.251  | 0.136  | 0.223  | 0.513  | 3.93E-15 |
| WDR66    | 0.398  | 0.195  | 0.617  | 0.66   | 1.361  | 4.00E-15 |
| MR1      | 0.075  | 0.36   | 0.422  | 0.722  | 0.663  | 4.00E-15 |
| SGO1     | -0.674 | -0.504 | -0.4   | -0.065 | -0.708 | 4.09E-15 |
| CLSTN1   | 0.204  | 0.095  | -0.009 | 0.42   | 0.749  | 4.10E-15 |
| TMEM198B | -0.593 | 0.328  | 0.549  | -0.189 | 0.203  | 4.10E-15 |
| PTGFRN   | 0.403  | 0.121  | 0.13   | 0.417  | 0.837  | 4.11E-15 |
| GFOD2    | -0.173 | -0.125 | -0.115 | 0.039  | 0.363  | 4.11E-15 |
| CD83     | 0.441  | 1.738  | 0.952  | -0.086 | 0.831  | 4.14E-15 |
| NOS3     | -0.045 | -0.427 | -0.23  | -0.04  | -0.627 | 4.17E-15 |
| SNORD30  | -0.335 | -0.188 | -0.34  | -1.272 | -1.659 | 4.25E-15 |
| SLC36A1  | -0.099 | 0.09   | 0.001  | -0.084 | -0.533 | 4.27E-15 |
| MT-ND1   | -0.49  | -0.347 | 0.34   | -1.158 | -1.04  | 4.28E-15 |
| GNPTAB   | 0.374  | 0.081  | -0.041 | 0.152  | 0.364  | 4.30E-15 |
| DHRS13   | -0.661 | -0.393 | -0.189 | -0.089 | -1.123 | 4.33E-15 |
| PEBP1P2  | 0.204  | -0.3   | -0.154 | 0.327  | 0.643  | 4.44E-15 |
| QARS     | 0.125  | 0.127  | 0.128  | 0.268  | 0.495  | 4.47E-15 |
| SENP6    | 0.189  | 0.342  | 0.228  | 0.286  | 0.493  | 4.54E-15 |
| TCN2     | 0.204  | 0.018  | 0.066  | 0.525  | 0.687  | 4.58E-15 |
| PPP1R13L | 0.108  | -0.064 | 0.372  | 0.508  | 0.551  | 4.62E-15 |
| CLEC11A  | -0.513 | -0.361 | -0.101 | -0.266 | 0.438  | 4.64E-15 |
| CYB5R1   | 0.079  | 0.182  | 0.094  | 0.165  | -0.381 | 4.65E-15 |
| CROCCP2  | -0.404 | 0.127  | 0.115  | -0.739 | -0.663 | 4.65E-15 |

|             |        |        |        |        |        |          |
|-------------|--------|--------|--------|--------|--------|----------|
| LIG3        | 0.217  | -0.067 | 0.017  | 0.173  | -0.473 | 4.66E-15 |
| RP11-473M2  | -0.852 | 0.2    | 0.52   | -0.262 | 0.065  | 4.67E-15 |
| APP         | 0.343  | 0.124  | -0.006 | 0.451  | 0.804  | 4.68E-15 |
| TMED1       | 0.102  | 0.045  | -0.089 | 0.224  | -0.432 | 4.71E-15 |
| RP11-384K6  | -0.122 | 0.244  | 0.203  | -0.792 | -0.857 | 4.74E-15 |
| PTHLH       | 0.532  | -0.31  | -0.598 | -0.591 | -0.368 | 4.75E-15 |
| NIF3L1      | -0.238 | -0.397 | -0.112 | 0.075  | -0.718 | 4.79E-15 |
| KIF20B      | -0.452 | -0.584 | -0.621 | -0.243 | -0.209 | 4.81E-15 |
| RBM14       | 0.334  | 0.189  | -0.38  | -0.621 | -0.225 | 4.86E-15 |
| LIF         | 1.374  | 1.709  | 1.827  | 0.972  | 2.039  | 4.91E-15 |
| HS1BP3      | -0.098 | 0.206  | 0.242  | 0.421  | 0.513  | 4.95E-15 |
| SMAD5       | 0.288  | 0.219  | 0.227  | 0.261  | 0.527  | 5.03E-15 |
| ZMYM3       | -0.464 | -0.215 | 0.016  | 0.054  | -0.127 | 5.18E-15 |
| TRNP1       | 0.435  | -0.003 | -0.241 | -0.221 | -0.18  | 5.20E-15 |
| TMBIM6      | 0.238  | 0.032  | -0.038 | 0.299  | 0.48   | 5.24E-15 |
| FLNC        | 0.377  | 0.293  | 0.364  | 0.49   | 0.893  | 5.26E-15 |
| RP11-152N1  | -0.682 | -0.261 | -0.367 | -1.027 | -1.291 | 5.26E-15 |
| RP11-345J4. | -0.25  | -0.125 | -0.183 | -0.862 | -0.65  | 5.56E-15 |
| PIGW        | 0.191  | 0.024  | -0.235 | -0.263 | -0.333 | 5.69E-15 |
| H1FX        | -0.062 | -0.572 | -0.552 | -0.105 | -0.347 | 5.85E-15 |
| PPP1CB      | 0.227  | 0.117  | 0.125  | 0.36   | 0.44   | 5.95E-15 |
| RF00099     | -0.076 | -0.208 | -0.158 | -1.062 | -1.465 | 5.97E-15 |
| SDR39U1     | -0.398 | 0.062  | 0.063  | -0.324 | -0.577 | 6.00E-15 |
| EMC3        | -0.089 | -0.101 | -0.101 | -0.111 | -0.491 | 6.01E-15 |
| SNORA8      | -0.416 | 0.064  | 0.11   | -0.945 | -0.927 | 6.09E-15 |
| IRAK1       | 0.071  | -0.024 | -0.016 | 0.101  | 0.413  | 6.13E-15 |
| NEK10       | -0.215 | 0.309  | 1.004  | 0.306  | 1.473  | 6.14E-15 |
| FBXO43      | -1.212 | -0.722 | -0.287 | -0.309 | -1.363 | 6.42E-15 |
| CTD-2258A2  | 0.468  | -0.176 | 0.169  | 0.134  | 1.423  | 6.67E-15 |
| PIGZ        | -0.52  | -0.047 | -0.15  | -0.266 | 0.733  | 6.68E-15 |
| MT1X        | 0.107  | -0.03  | -0.177 | -0.171 | -0.807 | 7.00E-15 |
| QKI         | 0.371  | 0.043  | -0.218 | -0.082 | 0.165  | 7.33E-15 |
| SP3         | 0.447  | 0.114  | 0.017  | 0.148  | 0.051  | 7.40E-15 |
| HID1        | -0.426 | -0.089 | 0.197  | 0.256  | 0.501  | 7.50E-15 |
| FUOM        | -0.079 | -0.163 | -0.213 | -0.299 | -0.755 | 7.61E-15 |
| USP18       | 0.083  | -0.18  | -0.142 | 0.049  | -0.493 | 7.77E-15 |
| TPGS1       | 0.058  | 0.261  | 0.142  | 0.46   | 1.2    | 7.79E-15 |
| TTF2        | -0.203 | -0.086 | -0.08  | -0.152 | -0.574 | 7.96E-15 |

|            |        |        |        |        |        |          |
|------------|--------|--------|--------|--------|--------|----------|
| ZFPM2      | -0.37  | 0.2    | -0.385 | -0.538 | -0.385 | 8.00E-15 |
| ABHD8      | -0.323 | 0.208  | 0.182  | 0.567  | 0.929  | 8.03E-15 |
| RP11-10K16 | -0.811 | -0.033 | 0.207  | 0.252  | 0.995  | 8.16E-15 |
| MARK3      | -0.077 | 0.079  | 0.163  | 0.166  | 0.412  | 8.17E-15 |
| PPP1R35    | -0.972 | -0.467 | -0.193 | -0.313 | -0.067 | 8.18E-15 |
| AAMDC      | 0.156  | 0.022  | 0.138  | 0.36   | 0.648  | 8.30E-15 |
| ESCO2      | 0.04   | 0.241  | -0.114 | -0.044 | -0.504 | 8.68E-15 |
| WDR11      | 0.146  | 0.175  | 0.219  | 0.255  | 0.459  | 8.71E-15 |
| TOP3B      | -0.485 | 0.078  | 0.069  | -0.327 | -0.447 | 8.76E-15 |
| HNRNPH3    | 0.164  | 0.085  | 0.174  | 0.354  | -0.286 | 8.90E-15 |
| CTNS       | -0.266 | 0.116  | -0.099 | -0.145 | -0.491 | 8.90E-15 |
| FAM108C1   | 0.386  | -0.086 | -0.025 | 0.198  | 0.716  | 8.94E-15 |
| ALDH9A1    | 0.334  | 0.084  | 0.003  | 0.398  | 0.575  | 9.00E-15 |
| NFIX       | 0.102  | -0.223 | -0.014 | 0.436  | 0.798  | 9.13E-15 |
| ANKS6      | -0.033 | -0.015 | 0.293  | 0.097  | 0.49   | 9.28E-15 |
| DCLRE1B    | 0.339  | 0.018  | -0.151 | -0.032 | -0.512 | 9.35E-15 |
| STK35      | 0.437  | 0.024  | -0.081 | -0.061 | 0.031  | 9.40E-15 |
| SLMAP      | -0.045 | 0.132  | 0.06   | 0.207  | 0.488  | 9.43E-15 |
| PANK2      | 0.206  | 0.049  | 0.092  | 0.069  | 0.463  | 9.54E-15 |
| FBXL6      | -0.597 | 0.193  | 0.041  | -0.784 | -0.606 | 9.91E-15 |
| TMOD3      | 0.287  | 0.126  | 0.052  | 0.415  | 0.658  | 9.97E-15 |
| GPATCH2L   | -0.119 | 0.438  | 0.265  | -0.14  | 0.104  | 1.02E-14 |
| ABCC10     | -0.32  | 0.02   | 0.102  | -0.329 | -0.381 | 1.02E-14 |
| LBR        | -0.384 | -0.475 | -0.464 | -0.268 | -0.339 | 1.03E-14 |
| PARP3      | -0.116 | 0.155  | 0.246  | 0.119  | 0.546  | 1.06E-14 |
| FAM109A    | 0.655  | 0.103  | 0.094  | 0.127  | 0.419  | 1.06E-14 |
| LIMD2      | 0.162  | -0.071 | -0.113 | -0.281 | 0.373  | 1.06E-14 |
| FKBP11     | 0      | -0.094 | -0.13  | -0.041 | -0.411 | 1.06E-14 |
| PLS3       | 0.535  | 0.219  | 0.078  | 0.494  | 0.857  | 1.07E-14 |
| KPNA4      | 0.258  | 0.034  | -0.076 | 0.237  | 0.474  | 1.07E-14 |
| BRI3BP     | 0.002  | -0.044 | -0.262 | -0.281 | -0.567 | 1.07E-14 |
| ZNF596     | -0.01  | 0.483  | 0.535  | -0.15  | -0.769 | 1.07E-14 |
| NOL4L      | -0.186 | -0.422 | 0.097  | 0.136  | 0.227  | 1.11E-14 |
| FAM127C    | 0.361  | 0.039  | 0.03   | 0.446  | 0.688  | 1.12E-14 |
| UBAP1      | 0.148  | 0.109  | 0.035  | 0.262  | 0.477  | 1.14E-14 |
| RAP1A      | 0.362  | 0.025  | -0.16  | -0.077 | -0.114 | 1.15E-14 |
| PMM1       | -0.376 | -0.147 | -0.009 | -0.521 | -0.673 | 1.15E-14 |
| PNMAL1     | 0.032  | -0.302 | 0.194  | 0.708  | 0.551  | 1.16E-14 |

|            |        |        |        |        |        |          |
|------------|--------|--------|--------|--------|--------|----------|
| HMG20B     | -0.339 | -0.262 | -0.263 | -0.304 | 0.188  | 1.16E-14 |
| SEMA3F     | 0.025  | -0.164 | -0.02  | 0.252  | 0.421  | 1.18E-14 |
| VASN       | 0.864  | -0.072 | -0.467 | -0.708 | -0.894 | 1.23E-14 |
| ANO6       | 0.256  | 0.13   | -0.022 | 0.12   | 0.568  | 1.39E-14 |
| DSCC1      | 0.001  | -0.059 | -0.084 | -0.163 | -1.186 | 1.43E-14 |
| LARS       | 0.231  | 0.164  | 0.202  | 0.521  | 0.562  | 1.48E-14 |
| CREB1      | 0.446  | 0.446  | 0.321  | 0.186  | 0.386  | 1.48E-14 |
| SMARCE1    | 0.193  | 0.02   | -0.067 | 0.111  | 0.451  | 1.53E-14 |
| PLA2R1     | -0.099 | 0.033  | 0.273  | 0.049  | 0.461  | 1.54E-14 |
| CMC2       | -0.315 | -0.307 | -0.234 | -0.578 | -1.172 | 1.54E-14 |
| SLC25A25   | -0.21  | -0.102 | -0.267 | -0.372 | -0.726 | 1.57E-14 |
| SSH1       | 0.031  | 0.396  | 0.331  | 0.018  | 0.34   | 1.58E-14 |
| IRF2       | 0.086  | 0.607  | 0.518  | 0.548  | 0.936  | 1.59E-14 |
| CBLB       | -0.315 | -0.097 | -0.519 | -0.451 | -0.691 | 1.62E-14 |
| RP11-392P7 | -0.271 | -0.289 | -0.205 | -0.078 | -0.871 | 1.62E-14 |
| CD55       | 0.4    | 0.194  | -0.067 | 0.168  | 0.509  | 1.63E-14 |
| TAF7       | 0.07   | 0      | 0.046  | 0.504  | 0.465  | 1.63E-14 |
| TNK2       | -0.725 | -0.497 | -0.092 | -0.532 | -0.172 | 1.64E-14 |
| ZNF473     | -0.566 | -0.103 | -0.437 | -0.574 | -0.713 | 1.66E-14 |
| TMCO3      | 0.153  | -0.02  | -0.085 | 0.152  | 0.353  | 1.67E-14 |
| ZNF343     | -0.12  | 0.298  | 0.074  | -0.377 | -0.417 | 1.68E-14 |
| TLDC1      | -0.052 | 0.042  | 0.209  | 0.48   | 0.573  | 1.73E-14 |
| PTPN4      | 0.051  | -0.223 | -0.27  | -0.212 | 0.406  | 1.74E-14 |
| PLSCR1     | 0.079  | -0.05  | -0.242 | -0.196 | -0.453 | 1.75E-14 |
| FGD6       | 0.339  | 0.307  | 0.163  | 0.261  | 0.659  | 1.79E-14 |
| N6AMT1     | -0.468 | -0.105 | 0.015  | -0.386 | -0.719 | 1.79E-14 |
| COL8A1     | 0.283  | 0.009  | -0.186 | 0.216  | 0.673  | 1.81E-14 |
| PIGK       | 0.094  | 0.061  | 0.064  | 0.474  | 0.535  | 1.85E-14 |
| PPP2R5A    | -0.012 | -0.011 | -0.012 | 0.229  | 0.492  | 1.92E-14 |
| PGM3       | 0.363  | 0.058  | 0.068  | 0.211  | 0.368  | 1.92E-14 |
| CLSTN3     | -0.075 | 0.241  | 0.375  | 0.336  | 0.422  | 1.94E-14 |
| SH2B3      | 0.22   | -0.144 | 0.048  | 0.238  | 0.447  | 1.97E-14 |
| MYO1D      | 0.414  | 0.12   | -0.223 | 0.106  | 0.833  | 2.00E-14 |
| RCCD1      | -0.697 | -0.533 | -0.106 | -0.324 | 0.045  | 2.00E-14 |
| SCDP1      | 0.322  | -0.482 | -0.778 | -0.63  | -0.092 | 2.00E-14 |
| CYCS       | 0.025  | 0.001  | -0.01  | -0.273 | -0.694 | 2.03E-14 |
| WASHC5     | 0.221  | 0.017  | 0.016  | 0.322  | 0.478  | 2.12E-14 |
| MLH3       | -0.351 | -0.131 | 0.242  | 0.192  | 0.283  | 2.13E-14 |



|            |        |        |        |        |        |          |
|------------|--------|--------|--------|--------|--------|----------|
| PHC2       | 0.119  | -0.039 | -0.059 | 0.173  | 0.485  | 2.15E-14 |
| SREK1      | -0.052 | 0.108  | 0.104  | -0.431 | -0.462 | 2.15E-14 |
| FAM45B     | 0.091  | -0.083 | -0.116 | 0.108  | 0.624  | 2.18E-14 |
| BRPF3      | 0.418  | 0.099  | -0.119 | -0.124 | -0.019 | 2.18E-14 |
| MAP2       | 0.133  | 0.017  | -0.416 | -0.429 | -1.004 | 2.25E-14 |
| CTB-36O1.5 | -0.635 | -0.584 | 0.018  | -1.401 | -1.391 | 2.26E-14 |
| NPFFR2     | -0.08  | -0.19  | -0.338 | 0.422  | 0.809  | 2.33E-14 |
| CTC-539A10 | -0.282 | -0.272 | -0.215 | -0.121 | -0.875 | 2.39E-14 |
| SAMD4A     | 0.501  | 0.792  | 0.856  | 0.254  | 0.952  | 2.40E-14 |
| CTSC       | 0.117  | -0.129 | -0.303 | -0.041 | -0.357 | 2.40E-14 |
| SLC1A5     | 0.271  | -0.11  | -0.375 | -0.173 | -0.635 | 2.40E-14 |
| GTPBP2     | -0.588 | -0.06  | 0.055  | -0.395 | -0.277 | 2.43E-14 |
| RP11-89A12 | 0.213  | -0.074 | -0.19  | -0.07  | -0.518 | 2.44E-14 |
| LCAT       | 0.291  | 0.25   | 0.336  | -0.768 | -0.274 | 2.47E-14 |
| PLIN3      | 0.08   | -0.238 | -0.251 | 0.243  | 0.565  | 2.50E-14 |
| AGAP6      | -0.469 | 0.048  | 0.025  | -0.941 | -0.847 | 2.50E-14 |
| FOXK1      | 0.093  | 0.104  | 0.351  | 0.326  | 0.461  | 2.51E-14 |
| MRM1       | -0.888 | -0.045 | -0.319 | -0.663 | -0.725 | 2.51E-14 |
| ILK        | 0.089  | -0.037 | 0.029  | 0.297  | 0.417  | 2.64E-14 |
| RP11-506B1 | -1.767 | -0.527 | 0.253  | -0.688 | -0.422 | 2.68E-14 |
| GNS        | 0.232  | 0.077  | -0.033 | 0.352  | 0.653  | 2.74E-14 |
| NCAPD3     | 0.011  | -0.066 | -0.251 | -0.097 | -0.552 | 2.74E-14 |
| NUDT3      | 0.285  | -0.081 | -0.128 | 0.086  | 0.368  | 2.80E-14 |
| ZMYM1      | -0.672 | -0.225 | -0.169 | -0.174 | -0.308 | 2.81E-14 |
| CENPK      | -0.386 | 0.001  | 0.024  | -0.225 | -0.669 | 2.82E-14 |
| FRY        | -0.451 | -0.28  | -0.328 | -0.228 | -0.603 | 2.83E-14 |
| SPC24      | -0.48  | -0.35  | -0.103 | 0.079  | -0.668 | 2.95E-14 |
| FAM13A     | -0.566 | -0.006 | -0.055 | -0.297 | -0.695 | 2.98E-14 |
| NRROS      | 0.095  | -0.349 | 0.161  | 0.687  | 0.984  | 3.13E-14 |
| NPM3       | -0.08  | -0.176 | -0.26  | -0.421 | -0.573 | 3.13E-14 |
| CLU        | 0.282  | 0.048  | -0.088 | 0.378  | 0.711  | 3.36E-14 |
| DYNC1I2    | 0.354  | 0.162  | 0.094  | 0.577  | 0.653  | 3.37E-14 |
| RP11-632K2 | -0.57  | 0.244  | 0.281  | -0.565 | -0.414 | 3.38E-14 |
| KLF11      | 0.812  | 0.14   | 0.16   | 0.503  | 0.632  | 3.48E-14 |
| SPG11      | -0.013 | 0.019  | 0.254  | 0.482  | 0.2    | 3.48E-14 |
| SIRT7      | -0.512 | -0.045 | -0.141 | -0.621 | -0.596 | 3.48E-14 |
| CEP170B    | 0.091  | 0.331  | 0.24   | -0.203 | -0.064 | 3.53E-14 |
| KLHL17     | -0.884 | -0.37  | -0.226 | -1.043 | -0.758 | 3.54E-14 |

|             |        |        |        |        |        |          |
|-------------|--------|--------|--------|--------|--------|----------|
| NFE2L2      | 0.64   | 0.239  | 0.035  | 0.214  | 0.072  | 3.57E-14 |
| CAPRIN2     | 0.161  | -0.25  | 0.04   | -0.661 | -0.707 | 3.57E-14 |
| RP11-567G2  | 0.388  | -0.042 | 0.113  | 0.594  | 0.795  | 3.62E-14 |
| CAPN7       | -0.042 | 0.183  | 0.141  | 0.119  | -0.324 | 3.62E-14 |
| ACVR1       | 0.296  | -0.19  | -0.323 | -0.043 | 0.052  | 3.63E-14 |
| ARFGAP1     | -0.094 | 0.212  | 0.077  | -0.349 | -0.308 | 3.63E-14 |
| ANKMY1      | -0.205 | -0.223 | -0.097 | -0.472 | -0.875 | 3.72E-14 |
| FBP1        | -0.234 | -0.209 | -0.454 | 0.155  | 1.062  | 3.97E-14 |
| EXT2        | 0.216  | 0.07   | -0.052 | 0.342  | 0.5    | 3.98E-14 |
| ABC12-4924  | -0.653 | 0.27   | 0.402  | -0.531 | -0.541 | 3.99E-14 |
| RP11-343L1  | 0.373  | -0.084 | 0.084  | 0.52   | 0.814  | 4.00E-14 |
| MKNK2       | -0.166 | 0.013  | 0.04   | 0.066  | 0.547  | 4.01E-14 |
| RP11-379H1  | -0.214 | -0.171 | 0.237  | 0.515  | 0.537  | 4.10E-14 |
| PRKCH       | 0.365  | -0.152 | 0.09   | 0.424  | 0.517  | 4.28E-14 |
| MRTO4       | 0.193  | -0.08  | -0.244 | -0.02  | -0.368 | 4.29E-14 |
| CHST7       | -0.218 | -0.179 | -0.124 | 0.106  | 0.796  | 4.33E-14 |
| DDX55       | -0.234 | -0.059 | -0.078 | -0.477 | -0.653 | 4.39E-14 |
| AGBL5       | -0.003 | 0.123  | 0.113  | 0.426  | 0.532  | 4.44E-14 |
| FRRS1       | 0.126  | -0.047 | -0.255 | -0.551 | -1.267 | 4.48E-14 |
| RP11-274B2  | -0.208 | 0.169  | -0.031 | -0.965 | -0.671 | 4.56E-14 |
| TCTEX1D1    | -0.619 | 0.195  | 0.362  | -0.246 | 0.133  | 4.65E-14 |
| PPTC7       | 0.161  | -0.01  | -0.335 | -0.26  | -0.163 | 4.74E-14 |
| SFXN2       | -0.502 | -0.089 | 0.05   | -0.238 | -0.639 | 4.74E-14 |
| KANSL2      | 0.159  | -0.029 | -0.215 | -0.36  | -0.441 | 4.98E-14 |
| TCEA3       | -0.207 | 0.577  | 0.906  | 1.035  | 1.63   | 5.01E-14 |
| OXA1L       | -0.087 | -0.011 | 0.107  | 0.164  | 0.355  | 5.01E-14 |
| NQO2        | -0.151 | -0.091 | -0.051 | -0.207 | -0.73  | 5.01E-14 |
| METTL4      | -0.426 | -0.028 | 0.049  | -0.058 | -0.474 | 5.08E-14 |
| TSPAN2      | -0.137 | 0.109  | 0.02   | -0.105 | -1.071 | 5.14E-14 |
| GYPE        | 0.887  | 0.007  | -0.036 | -0.15  | -0.333 | 5.19E-14 |
| RP1-45P21.3 | -0.079 | 0.31   | 0.351  | -0.57  | -0.532 | 5.20E-14 |
| KCNJ12      | 0.348  | -0.416 | -0.114 | 0.32   | 0.906  | 5.21E-14 |
| GPR3        | -0.58  | -0.411 | -0.73  | -1.15  | -1.06  | 5.22E-14 |
| ESM1        | 0.076  | 0.45   | 0.043  | 0.076  | -0.287 | 5.30E-14 |
| GSN         | 0.352  | 0.269  | 0.273  | 0.788  | 0.807  | 5.32E-14 |
| GRN         | 0.249  | 0.083  | -0.027 | 0.442  | 0.807  | 5.36E-14 |
| C1orf174    | -0.293 | -0.313 | -0.273 | -0.547 | -0.65  | 5.46E-14 |
| CBX1        | 0.288  | -0.016 | -0.109 | 0.218  | 0.522  | 5.49E-14 |

|            |        |        |        |        |        |          |
|------------|--------|--------|--------|--------|--------|----------|
| CHCHD8     | -0.14  | -0.17  | -0.113 | -0.262 | -0.589 | 5.62E-14 |
| INTS10     | 0.043  | -0.02  | -0.021 | 0.07   | -0.408 | 5.68E-14 |
| MT-ND4L    | -0.524 | -0.415 | 0.284  | -1.23  | -0.947 | 5.72E-14 |
| CLEC1B     | -0.456 | -0.306 | -0.594 | -0.929 | -2.082 | 5.73E-14 |
| AC124789.1 | -0.407 | -0.038 | 0.158  | 0.092  | -0.715 | 5.76E-14 |
| AUNIP      | 0.238  | -0.288 | -0.612 | -0.425 | -0.808 | 5.77E-14 |
| CCDC74B    | 0.067  | -0.165 | -0.509 | -0.547 | -1.476 | 5.85E-14 |
| NRM        | 0.024  | -0.074 | -0.07  | 0.114  | -0.566 | 5.87E-14 |
| IRF3       | -0.271 | -0.021 | 0.031  | -0.194 | -0.597 | 5.89E-14 |
| TSPAN8     | -0.146 | 0.128  | -0.101 | 0.065  | -1.36  | 5.89E-14 |
| SPTLC2     | 0.092  | -0.19  | -0.037 | 0.118  | 0.344  | 5.90E-14 |
| SPATA20    | -0.317 | -0.076 | 0.074  | -0.192 | 0.361  | 6.09E-14 |
| ZNF37A     | 0.049  | 0.44   | 0.433  | 0.135  | 0.398  | 6.14E-14 |
| RP11-320A1 | -0.298 | -0.495 | -0.505 | -0.91  | -1.11  | 6.14E-14 |
| PFAS       | -0.079 | -0.039 | -0.133 | -0.165 | -0.594 | 6.52E-14 |
| HYPK       | 0.063  | -0.069 | -0.08  | -0.118 | -0.461 | 6.56E-14 |
| UTP15      | -0.061 | -0.053 | -0.324 | -0.279 | -0.625 | 6.58E-14 |
| FSTL5      | -0.254 | -0.067 | 0.317  | 0.226  | 0.673  | 6.62E-14 |
| STRAP      | 0.289  | 0.199  | 0.003  | 0.17   | -0.337 | 6.68E-14 |
| ASF1A      | -0.036 | -0.228 | -0.439 | -0.298 | -0.615 | 6.74E-14 |
| FRAT2      | -0.426 | 0.035  | -0.434 | 0.009  | 0.479  | 6.82E-14 |
| KIAA1370   | 0.335  | 0.363  | 0.294  | 0.206  | 0.587  | 6.95E-14 |
| MT-ND5     | -0.507 | -0.364 | 0.361  | -1.062 | -0.65  | 6.98E-14 |
| GEMIN2     | -0.604 | -0.26  | -0.174 | -0.561 | -0.966 | 7.17E-14 |
| CCDC15     | -0.48  | 0.221  | 0.273  | 0.352  | -0.126 | 7.25E-14 |
| ATP6V0A2   | -0.049 | 0.049  | -0.102 | -0.288 | -0.347 | 7.26E-14 |
| AC009336.1 | -1.103 | -0.459 | -0.059 | -1.132 | -1.203 | 7.26E-14 |
| GGCX       | 0.008  | 0.072  | 0.055  | 0.203  | 0.386  | 7.30E-14 |
| SUPT7L     | -0.093 | 0.317  | 0.33   | -0.089 | -0.249 | 7.31E-14 |
| C1QTNF6    | -0.153 | -0.422 | -0.13  | 0.214  | -0.36  | 7.31E-14 |
| ASAH1      | -0.032 | -0.018 | -0.063 | 0.154  | 0.493  | 7.33E-14 |
| CFAP20     | 0.062  | -0.124 | -0.314 | -0.193 | -0.433 | 7.48E-14 |
| CDCA4      | 0.003  | -0.41  | -0.426 | -0.184 | -0.426 | 7.49E-14 |
| RBM3       | 0.026  | -0.063 | -0.094 | -0.247 | -0.481 | 7.62E-14 |
| CD2AP      | 0.231  | 0.208  | 0.085  | 0.382  | 0.627  | 8.05E-14 |
| CPTP       | -0.388 | -0.076 | 0.065  | 0.284  | 0.526  | 8.11E-14 |
| ZNF366     | -1.302 | -0.708 | -0.363 | 0.03   | 0.161  | 8.18E-14 |
| SNORD22    | -0.057 | 0.226  | -0.06  | -0.954 | -1.317 | 8.22E-14 |

|            |        |        |        |        |        |          |
|------------|--------|--------|--------|--------|--------|----------|
| CNOT6L     | 0.153  | 0.229  | -0.161 | -0.213 | -0.373 | 8.47E-14 |
| THBS3      | -0.528 | -0.052 | 0.247  | -0.183 | 0.266  | 8.62E-14 |
| SPRY4      | -0.195 | -0.018 | 0.247  | -0.045 | 0.513  | 8.79E-14 |
| STARD8     | 0.344  | -0.399 | -0.079 | -0.372 | -0.033 | 8.83E-14 |
| CCDC149    | 0.259  | 0.062  | 0.181  | 0.384  | 0.985  | 9.08E-14 |
| MAP4K3     | 0.344  | 0.176  | 0.071  | 0.167  | 0.484  | 9.20E-14 |
| SNORD83B   | -0.3   | 0.194  | 0.01   | -1.038 | -1.164 | 9.24E-14 |
| ENAH       | 0.399  | -0.081 | -0.255 | -0.093 | -0.023 | 9.29E-14 |
| EIF2S3L    | 0.248  | 0.27   | 0.327  | 0.409  | 0.546  | 9.36E-14 |
| STAG3L5P   | -0.797 | -0.073 | 0.209  | -0.877 | -0.646 | 9.41E-14 |
| SLC1A4     | 0.263  | 0.024  | 0.002  | 0.243  | -0.429 | 9.53E-14 |
| MAP1A      | 0.034  | 0.291  | 0.223  | 0.334  | -1.013 | 9.54E-14 |
| TRIM38     | -0.038 | 0.269  | 0.404  | 0.248  | 0.448  | 9.64E-14 |
| ZNF333     | -0.296 | 0.071  | -0.085 | -0.719 | -0.819 | 9.69E-14 |
| PVT1       | -0.344 | 0.433  | 0.658  | 0.083  | 0.413  | 9.71E-14 |
| ABL2       | 0.595  | 0.101  | 0.307  | 0.317  | 0.485  | 9.75E-14 |
| MT-CYB     | -0.487 | -0.373 | 0.315  | -1.132 | -0.911 | 9.77E-14 |
| CAP2       | 0.303  | -0.035 | 0.087  | 0.474  | 0.804  | 9.79E-14 |
| RRP8       | -0.493 | -0.189 | -0.118 | -0.32  | -0.541 | 1.02E-13 |
| GPATCH4    | 0.207  | 0.1    | 0.102  | 0.113  | -0.33  | 1.04E-13 |
| PPFIA1     | -0.376 | 0.062  | -0.063 | -0.579 | -0.517 | 1.06E-13 |
| ATP6V0A1   | 0.007  | 0.01   | 0.261  | 0.429  | 0.327  | 1.08E-13 |
| ZNF700     | -0.352 | 0.08   | -0.162 | -0.676 | -0.639 | 1.09E-13 |
| ATP11C     | 0.11   | 0.023  | -0.077 | 0.009  | 0.418  | 1.11E-13 |
| MGEA5      | 0.308  | 0.213  | 0.256  | 0.045  | 0.443  | 1.14E-13 |
| ERMARD     | -0.204 | 0.038  | 0.132  | 0.075  | -0.533 | 1.15E-13 |
| TEK        | 0.286  | -0.084 | -0.407 | -0.04  | 0.191  | 1.17E-13 |
| SLF2       | -0.123 | 0.045  | 0.097  | -0.119 | -0.356 | 1.17E-13 |
| SUOX       | -0.419 | -0.002 | -0.022 | 0.118  | -0.222 | 1.18E-13 |
| TNIK       | 0.177  | -0.197 | -0.305 | -0.103 | -0.561 | 1.18E-13 |
| ACACA      | 0.168  | -0.182 | -0.285 | -0.408 | 0.059  | 1.19E-13 |
| TEF        | 0.197  | 0.085  | -0.402 | -0.952 | -0.021 | 1.19E-13 |
| SPSB2      | -1.018 | -0.281 | -0.451 | -0.694 | -0.95  | 1.21E-13 |
| PLXNA3     | -0.268 | 0.019  | 0.112  | -0.563 | -0.381 | 1.23E-13 |
| TINF2      | 0.048  | 0.076  | 0.186  | 0.409  | 0.164  | 1.25E-13 |
| TAOK2      | -0.256 | -0.014 | -0.06  | -0.326 | -0.398 | 1.28E-13 |
| DCHS1      | 0.181  | -0.073 | -0.174 | -0.026 | 0.503  | 1.33E-13 |
| RP4-751H13 | -1.167 | -0.276 | -0.231 | -0.796 | -0.973 | 1.37E-13 |

|             |        |        |        |        |        |          |
|-------------|--------|--------|--------|--------|--------|----------|
| SH3D21      | -0.219 | 0.207  | 0.22   | -0.54  | -0.663 | 1.38E-13 |
| ALMS1       | -0.047 | 0.091  | -0.067 | -0.251 | -0.734 | 1.39E-13 |
| CPQ         | 0.111  | 0.039  | -0.08  | 0.29   | 0.601  | 1.40E-13 |
| PAFAH2      | -0.57  | -0.188 | 0.047  | 0.289  | -0.067 | 1.40E-13 |
| DCUN1D5     | 0.048  | -0.038 | -0.125 | 0.064  | -0.362 | 1.42E-13 |
| RP11-1024P  | -0.519 | -0.148 | 0.15   | -0.229 | 0.61   | 1.45E-13 |
| SLC12A4     | 0.184  | 0.329  | 0.298  | -0.132 | 0.017  | 1.45E-13 |
| LRRC8B      | 0.104  | 0.202  | -0.353 | -0.459 | -0.1   | 1.46E-13 |
| KCTD7       | -0.237 | -0.011 | 0.039  | -0.402 | -0.619 | 1.48E-13 |
| TTC12       | 0.205  | 0.318  | 0.65   | 0.948  | 1.095  | 1.49E-13 |
| ZNF324B     | -0.031 | 0.238  | -0.385 | -0.44  | -0.737 | 1.50E-13 |
| LMBR1       | 0.081  | 0.095  | 0.084  | 0.239  | 0.452  | 1.52E-13 |
| MIB2        | -0.286 | 0.114  | 0.416  | 0.039  | 0.605  | 1.55E-13 |
| FGD4        | 0.447  | 0.422  | 0.486  | 0.534  | 0.269  | 1.60E-13 |
| NXF1        | -0.049 | 0.181  | 0.029  | -0.475 | -0.243 | 1.61E-13 |
| LARP6       | 0.434  | 0.112  | 0.085  | 0.151  | 0.729  | 1.62E-13 |
| QTRT1       | -0.147 | 0.12   | 0.114  | -0.386 | -0.513 | 1.64E-13 |
| MXD1        | 0.223  | 0.418  | 0.351  | 0.058  | -0.171 | 1.68E-13 |
| PSKH1       | -0.016 | 0.02   | -0.066 | 0.141  | 0.465  | 1.69E-13 |
| RP11-323P1  | 0.171  | 0.234  | 0.007  | -0.945 | -1.028 | 1.72E-13 |
| AC133109.1  | 0.412  | 0.888  | 0.722  | 0.78   | 1.933  | 1.73E-13 |
| POLG2       | -0.706 | -0.004 | 0.225  | -0.38  | -0.59  | 1.73E-13 |
| RP4-539M6   | 0.083  | -0.167 | -0.172 | 0.076  | 0.897  | 1.75E-13 |
| SUFU        | -0.121 | -0.171 | -0.053 | 0.295  | 0.545  | 1.76E-13 |
| TRMU        | -0.226 | -0.015 | -0.135 | -0.405 | -0.602 | 1.78E-13 |
| RP11-111F10 | 0.299  | 0.198  | 0.351  | 0.605  | 0.75   | 1.80E-13 |
| HMG2        | -0.201 | -0.097 | -0.072 | -0.251 | -0.81  | 1.80E-13 |
| EP400NL     | -0.384 | 0.07   | 0.08   | -0.684 | -0.661 | 1.81E-13 |
| MYD88       | 0.123  | -0.019 | -0.08  | 0.179  | 0.455  | 1.83E-13 |
| DCTN2       | 0.165  | 0.143  | 0.149  | 0.448  | 0.453  | 1.83E-13 |
| EVL         | -0.23  | 0.002  | -0.151 | -0.51  | -0.047 | 1.89E-13 |
| RP11-381E2  | -0.628 | -0.385 | -0.505 | -1.437 | -1.356 | 1.89E-13 |
| RAB10       | 0.296  | 0.056  | 0.011  | 0.328  | 0.571  | 1.94E-13 |
| AK9         | -0.137 | 0.011  | 0.435  | 0.58   | 0.988  | 1.95E-13 |
| SEPSECS     | -0.092 | 0.317  | 0.01   | -0.199 | -0.493 | 1.95E-13 |
| TSPO        | 0.04   | -0.096 | -0.074 | 0.188  | 0.481  | 1.97E-13 |
| SAMD10      | -0.851 | -0.114 | 0.058  | 0.076  | 0.544  | 1.99E-13 |
| RP11-278C7  | 0.163  | 0.125  | 0.16   | 0.385  | 0.489  | 1.99E-13 |

|              |        |        |        |        |        |          |
|--------------|--------|--------|--------|--------|--------|----------|
| CTD-2568P8   | 0.219  | -0.084 | -0.23  | 0.038  | -0.424 | 1.99E-13 |
| SDHAP1       | -0.199 | 0.135  | 0.044  | -0.92  | -0.793 | 2.05E-13 |
| KB-1572G7.1  | -0.454 | 0.363  | 0.36   | -0.68  | -0.686 | 2.07E-13 |
| SLC35D2      | 0.032  | -0.228 | 0.156  | 0.231  | 0.693  | 2.11E-13 |
| BCL3         | 0.676  | 0.497  | 0.152  | -0.028 | 0.486  | 2.14E-13 |
| RP11-25K19   | -0.248 | -0.152 | -0.315 | -0.129 | -0.942 | 2.15E-13 |
| RP6-218J18.1 | 0.013  | -0.069 | -0.117 | -0.509 | -0.567 | 2.16E-13 |
| UBR7         | 0.195  | 0.017  | -0.239 | -0.08  | -0.515 | 2.19E-13 |
| MMP2         | 0.347  | 0.075  | -0.067 | 0.378  | 0.715  | 2.20E-13 |
| GPRC5A       | 0.319  | 0.09   | 0.436  | 0.758  | 0.347  | 2.26E-13 |
| CCDC14       | -0.585 | -0.033 | 0.077  | -0.714 | -0.758 | 2.26E-13 |
| ACSL1        | 0.408  | 0.172  | 0.115  | 0.253  | 0.628  | 2.27E-13 |
| CTD-2033D1   | -0.331 | 0.065  | 0.109  | -0.628 | -0.689 | 2.28E-13 |
| NBL1         | 0.156  | -0.037 | -0.073 | 0.14   | 0.525  | 2.32E-13 |
| FBXO28       | 0.092  | 0.274  | 0.117  | 0.278  | 0.5    | 2.32E-13 |
| SOCS4        | 0.481  | 0.165  | 0.145  | -0.247 | -0.062 | 2.32E-13 |
| ZNF507       | 0.107  | 0.051  | -0.11  | -0.14  | -0.482 | 2.34E-13 |
| PNMA1        | 0.251  | -0.2   | -0.138 | 0.369  | 0.346  | 2.39E-13 |
| RAB2A        | 0.414  | 0.002  | -0.23  | 0.02   | 0.158  | 2.44E-13 |
| KIAA0040     | 0.002  | 0.195  | -0.033 | -0.08  | 0.493  | 2.45E-13 |
| ABI3BP       | 0.219  | 0.102  | 0.09   | 0.363  | 0.841  | 2.46E-13 |
| LPCAT2       | -0.004 | -0.144 | -0.291 | -0.233 | -0.377 | 2.56E-13 |
| LMBR1L       | -0.33  | 0.145  | 0.2    | -0.139 | 0.444  | 2.58E-13 |
| DUSP3        | 0.245  | 0.035  | 0.104  | 0.391  | 0.447  | 2.59E-13 |
| LDOC1        | 0.076  | -0.005 | 0.049  | 0.446  | 0.699  | 2.63E-13 |
| AP1S1        | 0.151  | -0.011 | 0.069  | 0.282  | 0.394  | 2.63E-13 |
| SLC25A24     | 0.395  | -0.026 | -0.141 | 0.203  | 0.114  | 2.63E-13 |
| CHKB         | -0.578 | 0.184  | 0.315  | -0.544 | -0.328 | 2.63E-13 |
| C16orf72     | 0.447  | 0.142  | -0.008 | 0.266  | 0.386  | 2.64E-13 |
| POLA2        | 0.198  | 0.227  | 0.023  | 0.133  | -0.497 | 2.70E-13 |
| CTNNB1       | 0.284  | 0.039  | -0.109 | 0.035  | 0.37   | 2.74E-13 |
| FAM76B       | 0.081  | 0.122  | -0.102 | -0.627 | -0.512 | 2.76E-13 |
| MEAF6        | -0.056 | -0.095 | 0.011  | 0.127  | 0.416  | 2.78E-13 |
| DENND1A      | 0.419  | 0.015  | 0.35   | 0.738  | 0.377  | 2.78E-13 |
| RP3-412A9.1  | -0.177 | -0.105 | -0.212 | -0.345 | -0.713 | 2.81E-13 |
| ALPL         | 0.79   | 0.689  | 0.236  | 0.292  | -1.034 | 2.81E-13 |
| MTERF3       | -0.285 | -0.121 | -0.292 | -0.306 | -0.596 | 2.82E-13 |
| ANKRD36C     | -0.767 | -0.144 | 0.154  | -0.965 | -1.632 | 2.82E-13 |

|             |        |        |        |        |        |          |
|-------------|--------|--------|--------|--------|--------|----------|
| TPX2        | -0.31  | -0.7   | -0.582 | -0.013 | -0.1   | 2.83E-13 |
| TMEM131     | 0.117  | 0.353  | 0.336  | 0.509  | 0.571  | 2.85E-13 |
| RAC1        | 0.356  | 0.052  | -0.055 | 0.23   | 0.47   | 2.93E-13 |
| ZNF761      | -0.125 | 0.31   | 0.227  | -0.307 | -0.42  | 2.99E-13 |
| ZNF778      | 0.041  | 0.113  | -0.018 | -0.508 | -0.476 | 2.99E-13 |
| DNAJA3      | -0.142 | -0.004 | -0.069 | 0.013  | -0.463 | 3.02E-13 |
| DNAJC10     | 0.209  | 0.154  | 0.089  | 0.325  | 0.396  | 3.05E-13 |
| SCRIB       | 0.098  | 0.336  | 0.415  | 0.461  | 0.515  | 3.06E-13 |
| HOXB2       | -0.737 | -0.278 | -0.454 | -0.535 | -0.392 | 3.06E-13 |
| PILRB       | -0.778 | -0.16  | 0.08   | -0.926 | -0.743 | 3.09E-13 |
| ELF1        | 0.581  | 0.093  | 0.017  | 0.316  | 0.246  | 3.15E-13 |
| UBTD2       | 0.16   | -0.036 | -0.036 | 0.138  | 0.477  | 3.16E-13 |
| SLC35E4     | -0.05  | 0.029  | 0.026  | 0.079  | 0.651  | 3.17E-13 |
| ADNP        | 0.216  | 0.038  | -0.056 | 0.199  | 0.411  | 3.19E-13 |
| B3GALT6     | -0.157 | -0.051 | 0.101  | 0.361  | 0.543  | 3.20E-13 |
| TOR2A       | -0.213 | 0.148  | -0.013 | -0.258 | -0.558 | 3.23E-13 |
| MSH5        | -0.719 | -0.29  | 0.258  | -0.781 | -1.145 | 3.31E-13 |
| STYXL1      | -0.049 | 0.052  | 0.261  | 0.392  | 0.525  | 3.33E-13 |
| CLEC4GP1    | -1.853 | -0.906 | -0.02  | -0.564 | -0.337 | 3.34E-13 |
| TMEM187     | -0.089 | -0.065 | 0.143  | 0.57   | 0.686  | 3.39E-13 |
| CTA-384D8.1 | 0.161  | 0.169  | -0.04  | -0.542 | -1.074 | 3.58E-13 |
| THUMPD3     | -0.308 | -0.119 | 0.063  | 0.166  | -0.381 | 3.62E-13 |
| HDX         | -0.489 | 0.386  | 0.033  | 0.024  | 0.505  | 3.65E-13 |
| IDH1        | 0.325  | -0.107 | -0.238 | 0.163  | 0.46   | 3.70E-13 |
| CYP2R1      | -0.841 | -0.162 | 0.176  | -0.227 | -0.486 | 3.80E-13 |
| BRD3        | 0.16   | 0.124  | -0.039 | 0.129  | 0.457  | 3.85E-13 |
| RANBP10     | -0.135 | 0.335  | 0.134  | 0.064  | 0.32   | 3.92E-13 |
| C6orf62     | 0.241  | 0.357  | 0.256  | 0.256  | 0.218  | 3.92E-13 |
| INTS7       | 0.354  | 0.066  | -0.231 | 0.002  | -0.138 | 3.94E-13 |
| MTMR12      | 0.142  | -0.03  | -0.078 | 0.137  | 0.463  | 4.00E-13 |
| BTBD6       | 0.017  | -0.137 | -0.079 | -0.122 | -0.398 | 4.05E-13 |
| RIC1        | 0.06   | 0.353  | 0.065  | -0.113 | 0.048  | 4.06E-13 |
| ENGASE      | -0.643 | -0.018 | -0.153 | -0.686 | -0.445 | 4.07E-13 |
| PTPN9       | 0.231  | -0.022 | -0.142 | 0.187  | 0.401  | 4.10E-13 |
| PPIL1       | -0.032 | -0.247 | -0.167 | -0.09  | -0.653 | 4.14E-13 |
| AC010084.1  | -0.089 | 0.028  | -0.146 | -0.031 | -1.366 | 4.17E-13 |
| TRIM2       | 0.206  | 0.011  | -0.013 | 0.154  | 0.726  | 4.21E-13 |
| UBE3B       | 0.027  | 0.039  | 0.218  | 0.242  | 0.376  | 4.25E-13 |

|            |        |        |        |        |        |          |
|------------|--------|--------|--------|--------|--------|----------|
| GRAMD1B    | 0.098  | 0.139  | 0.393  | 0.138  | 1.067  | 4.27E-13 |
| DGKQ       | -0.637 | -0.073 | -0.174 | -0.822 | -0.431 | 4.27E-13 |
| LTBP2      | 0.343  | 0.006  | -0.209 | 0.084  | 0.688  | 4.28E-13 |
| PGM2       | 0.154  | -0.035 | -0.044 | 0.364  | 0.542  | 4.28E-13 |
| SLC25A40   | -0.171 | 0.016  | -0.198 | -0.409 | -0.536 | 4.28E-13 |
| ZER1       | 0.205  | 0.198  | 0.382  | 0.709  | 0.777  | 4.34E-13 |
| ZSCAN16    | -0.743 | 0.015  | 0.232  | 0.246  | 0.776  | 4.35E-13 |
| RP11-370B1 | 0.528  | 0.031  | -0.232 | -0.005 | 0.374  | 4.35E-13 |
| MCCC1      | -0.14  | -0.008 | 0.107  | 0.422  | 0.073  | 4.36E-13 |
| BICD2      | -0.105 | -0.057 | -0.172 | -0.561 | -0.498 | 4.36E-13 |
| PABPC3     | 0.111  | 0.035  | 0.109  | 0.219  | 0.445  | 4.37E-13 |
| FAM217B    | -0.129 | 0.165  | -0.138 | -0.062 | -0.506 | 4.37E-13 |
| PIGN       | -0.037 | -0.054 | -0.016 | 0.248  | 0.354  | 4.42E-13 |
| PDE8A      | 0.367  | 0.131  | -0.11  | -0.242 | 0.066  | 4.44E-13 |
| TUBG2      | -0.423 | 0.041  | 0.002  | -0.236 | -0.48  | 4.44E-13 |
| CTD-2224J9 | -0.271 | 0.216  | -0.139 | -0.411 | -0.695 | 4.46E-13 |
| NAT9       | -0.411 | 0.091  | 0.12   | -0.331 | -0.19  | 4.48E-13 |
| SMARCD3    | 0.012  | -0.269 | -0.374 | -0.807 | -0.987 | 4.54E-13 |
| WDR37      | 0.405  | 0.012  | -0.043 | 0.088  | 0.271  | 4.61E-13 |
| LPAR1      | -0.629 | 0.13   | 0.996  | 0.823  | 0.248  | 4.69E-13 |
| PARD6A     | -0.523 | -0.277 | 0.493  | 1.021  | 0.875  | 4.81E-13 |
| HIST1H2BK  | 0.37   | 0.367  | 0.382  | 0.945  | 0.936  | 4.82E-13 |
| HLA-B      | 0.251  | 0.328  | 0.166  | 0.524  | 0.662  | 4.90E-13 |
| RUBCN      | -0.266 | 0.183  | 0.088  | -0.36  | -0.235 | 5.00E-13 |
| HDAC5      | 0.358  | 0.404  | 0.348  | 0.472  | 0.716  | 5.07E-13 |
| KIF1B      | 0.481  | 0.272  | 0.05   | 0.186  | 0.383  | 5.10E-13 |
| A4GALT     | 0.211  | -0.009 | 0.025  | 0.26   | 0.674  | 5.11E-13 |
| SLC25A6    | 0.184  | 0.085  | 0.063  | 0.316  | 0.524  | 5.13E-13 |
| PRSS53     | -0.573 | -0.181 | 0.012  | -0.909 | -0.764 | 5.13E-13 |
| CADPS2     | 0.616  | 0.087  | -0.111 | 0.115  | -0.292 | 5.15E-13 |
| C9orf72    | 0.128  | -0.138 | -0.219 | -0.744 | -0.893 | 5.18E-13 |
| AC026271.5 | 0.176  | 0.038  | -0.109 | 0.239  | 0.397  | 5.19E-13 |
| RELL2      | -0.538 | 0.181  | 0.287  | -0.255 | -0.441 | 5.19E-13 |
| TP53       | 0.15   | 0.235  | 0.221  | 0.448  | 0.695  | 5.22E-13 |
| C8orf58    | -0.309 | -0.143 | -0.133 | -0.313 | -0.577 | 5.22E-13 |
| STK11      | -0.043 | 0.173  | 0.214  | 0.155  | 0.425  | 5.23E-13 |
| SH3BP4     | 0.741  | 0.099  | 0.038  | 0.287  | 0.273  | 5.25E-13 |
| NNT        | 0.099  | -0.021 | -0.048 | 0.042  | 0.387  | 5.27E-13 |



|             |        |        |        |        |        |          |
|-------------|--------|--------|--------|--------|--------|----------|
| AC002116.8  | -0.572 | 0.08   | -0.227 | -1.101 | -1.203 | 5.29E-13 |
| CNPY4       | 0.042  | 0.011  | 0.041  | 0.344  | 0.5    | 5.33E-13 |
| PLPP5       | -0.1   | -0.04  | 0.001  | -0.281 | -0.538 | 5.37E-13 |
| SCAMP5      | -0.146 | -0.137 | 0.154  | 0.5    | 0.709  | 5.38E-13 |
| CYTH1       | 0.272  | 0.349  | 0.272  | 0.087  | 0.45   | 5.48E-13 |
| DDX11L2     | -0.522 | 0.417  | 0.214  | -0.132 | -0.583 | 5.53E-13 |
| PCDHGC3     | 0.197  | 0.018  | -0.004 | 0.312  | 0.729  | 5.55E-13 |
| NBPF8P      | -0.507 | 0.03   | 0.356  | -0.6   | -0.688 | 5.57E-13 |
| TRIM66      | -0.521 | -0.011 | 0.418  | -0.402 | -0.317 | 5.59E-13 |
| BTD         | 0.183  | 0.126  | 0.1    | 0.389  | 0.637  | 5.74E-13 |
| MIR3064     | -0.722 | 0.074  | 0.151  | -1.01  | -0.726 | 5.75E-13 |
| MED20       | 0.186  | 0.255  | 0.19   | 0.407  | -0.021 | 5.78E-13 |
| ANKRD13D    | -0.725 | -0.226 | -0.14  | -0.729 | -0.47  | 5.81E-13 |
| MDM4        | -0.451 | -0.059 | 0.178  | -0.702 | -0.82  | 5.82E-13 |
| EXOSC2      | -0.071 | -0.137 | -0.223 | -0.231 | -0.606 | 5.93E-13 |
| SPR         | 0.067  | 0.016  | 0.125  | 0.415  | 0.634  | 5.96E-13 |
| TMED8       | 0.095  | 0.146  | -0.201 | -0.201 | -0.348 | 6.02E-13 |
| KCNK6       | -0.301 | 0.038  | 0.226  | -0.494 | -0.486 | 6.10E-13 |
| CTDSP2      | 0.164  | 0      | -0.06  | 0.176  | 0.441  | 6.17E-13 |
| CXCL8       | -0.937 | 0.012  | -0.628 | -1.346 | -0.567 | 6.18E-13 |
| UBFD1       | 0.319  | 0.075  | 0.05   | 0.192  | 0.567  | 6.21E-13 |
| NFRKB       | -0.303 | -0.037 | 0.028  | -0.134 | -0.331 | 6.21E-13 |
| RP3-368A4.6 | -0.67  | 0.062  | 0.124  | -1.051 | -0.864 | 6.42E-13 |
| BTA1F1      | -0.219 | 0.28   | 0.209  | -0.468 | -0.381 | 6.46E-13 |
| MOB3A       | -0.025 | 0.134  | 0.373  | 0.631  | 0.627  | 6.50E-13 |
| RP11-231C1  | -0.293 | -0.039 | 0.17   | -0.952 | -0.678 | 6.50E-13 |
| MRPS28      | -0.018 | -0.175 | -0.249 | -0.297 | -0.725 | 6.63E-13 |
| BNC1        | -0.235 | 0.109  | 0.163  | 0.338  | 0.319  | 6.69E-13 |
| TLR1        | -0.137 | 0.228  | 0.277  | 0.618  | 0.944  | 6.81E-13 |
| D2HGDH      | -0.572 | -0.086 | -0.007 | -0.487 | -0.643 | 6.90E-13 |
| TRPV2       | -0.047 | -0.265 | -0.033 | 0.386  | 0.879  | 7.07E-13 |
| HDAC7       | -0.196 | -0.26  | -0.107 | -0.281 | -0.473 | 7.12E-13 |
| CDKN3       | -0.814 | -0.906 | -0.796 | -0.854 | -1.017 | 7.18E-13 |
| SNCG        | -0.076 | -0.169 | -0.057 | 0.179  | 0.474  | 7.22E-13 |
| SCFD2       | 0.529  | -0.099 | -0.268 | 0.074  | -0.333 | 7.25E-13 |
| SNORD36A    | -0.476 | -0.004 | -0.132 | -1.297 | -1.03  | 7.27E-13 |
| AMBRA1      | 0.207  | 0.236  | 0.13   | 0.312  | 0.646  | 7.31E-13 |
| METT17      | -0.259 | -0.082 | -0.104 | -0.479 | -0.743 | 7.36E-13 |

|            |        |        |        |        |        |          |
|------------|--------|--------|--------|--------|--------|----------|
| NFATC1     | 0.786  | 0.188  | 0.089  | 0.23   | 0.165  | 7.52E-13 |
| RNF215     | -0.636 | -0.295 | -0.083 | -0.536 | -0.52  | 7.55E-13 |
| CISD1      | 0.043  | -0.054 | 0.092  | 0.119  | 0.473  | 7.57E-13 |
| VPS26A     | 0.073  | 0.04   | -0.063 | 0.195  | 0.322  | 7.67E-13 |
| RP11-115D1 | 0.095  | -0.456 | -0.218 | -0.599 | -1.654 | 7.81E-13 |
| IFRD2      | -0.051 | -0.077 | -0.179 | -0.193 | -0.36  | 7.83E-13 |
| LOXL4      | 0.289  | 0.517  | 0.638  | 0.98   | 1.34   | 7.92E-13 |
| DNAJA1     | 0.235  | 0.245  | 0.221  | 0.52   | 0.728  | 7.96E-13 |
| RBM5       | -0.373 | 0.029  | 0.142  | -0.406 | -0.353 | 7.97E-13 |
| SMARCA1    | 0.312  | 0.262  | 0.146  | 0.565  | 1.012  | 8.05E-13 |
| RP11-448G1 | -0.036 | -0.002 | 0.2    | -1.029 | -0.812 | 8.07E-13 |
| NDRG3      | -0.06  | -0.092 | 0.079  | 0.35   | 0.373  | 8.10E-13 |
| HAUS8      | -0.05  | -0.329 | -0.359 | -0.266 | -0.743 | 8.17E-13 |
| RUFY1      | 0.255  | 0.044  | 0.11   | 0.305  | 0.559  | 8.29E-13 |
| PTPRS      | -0.116 | 0.256  | 0.124  | 0.078  | 0.894  | 8.31E-13 |
| DUS3L      | -0.006 | -0.048 | -0.119 | -0.368 | -0.628 | 8.39E-13 |
| RP11-657G2 | 0.407  | -0.314 | -0.623 | -0.594 | -0.31  | 8.42E-13 |
| PPRC1      | -0.017 | -0.21  | -0.234 | -0.457 | -0.391 | 8.42E-13 |
| RNF11      | 0.263  | 0.157  | 0.009  | 0.04   | 0.379  | 8.50E-13 |
| C1GALT1C1  | -0.05  | -0.108 | 0.048  | 0.267  | 0.447  | 8.62E-13 |
| SLC37A1    | 0.13   | 0.371  | 0.567  | 0.438  | 1.126  | 8.70E-13 |
| SLC25A4    | 0.145  | 0.243  | 0.124  | 0.502  | 0.644  | 8.70E-13 |
| SLC37A4    | -0.393 | 0.041  | 0      | -0.057 | -0.515 | 8.94E-13 |
| HERC2P4    | -0.538 | -0.067 | -0.175 | -1.102 | -1.029 | 9.25E-13 |
| RP11-100G1 | 1.229  | 1.584  | 1.696  | 1.303  | 1.669  | 9.33E-13 |
| WIPF1      | 0.15   | 0.163  | 0.18   | 0.41   | 0.643  | 9.38E-13 |
| AP2A2      | 0.065  | -0.094 | -0.078 | 0.191  | 0.556  | 9.60E-13 |
| RPP30      | 0.122  | 0.102  | -0.069 | -0.069 | -0.418 | 9.62E-13 |
| AC004987.9 | 0.303  | -0.197 | -0.07  | 0.391  | 0.762  | 9.82E-13 |
| BSG        | 0.194  | 0.036  | -0.056 | 0.388  | 0.622  | 9.90E-13 |
| ITGA10     | -0.025 | 0.108  | 0.085  | -0.38  | -0.239 | 9.90E-13 |
| ALDH1A3    | 0.698  | 0.03   | -0.396 | -0.152 | 0.111  | 9.95E-13 |
| AC093838.4 | -0.331 | 0.117  | 0.02   | -0.949 | -0.578 | 1.01E-12 |
| AC009299.5 | 0.068  | -0.04  | -0.052 | 0.138  | 0.595  | 1.03E-12 |
| TGFB2      | -0.35  | 0.329  | -0.016 | 0.154  | -0.387 | 1.04E-12 |
| IMP4       | 0.029  | -0.161 | -0.169 | -0.176 | -0.49  | 1.04E-12 |
| MPP3       | -0.163 | -0.112 | 0.132  | -0.647 | -0.891 | 1.04E-12 |
| DDX51      | -0.141 | -0.108 | -0.125 | -0.372 | -0.546 | 1.05E-12 |

|             |        |        |        |        |        |          |
|-------------|--------|--------|--------|--------|--------|----------|
| UBLCP1      | 0.158  | -0.018 | 0.087  | 0.387  | 0.385  | 1.06E-12 |
| REPIN1      | -0.322 | -0.125 | -0.178 | -0.122 | 0.24   | 1.06E-12 |
| PHF5A       | 0.002  | -0.141 | -0.139 | -0.186 | -0.549 | 1.07E-12 |
| MUS81       | -0.454 | -0.043 | -0.052 | -0.48  | -0.569 | 1.07E-12 |
| SLC30A3     | 0.16   | -0.095 | -0.493 | -0.663 | -1.691 | 1.08E-12 |
| RP11-1H8.3  | 0.346  | -0.135 | -0.157 | 0.308  | 0.837  | 1.10E-12 |
| ARID4A      | -0.062 | 0.268  | 0.004  | -0.113 | 0.347  | 1.10E-12 |
| FAM196B     | 0.126  | -0.36  | 0.088  | 0.493  | 0.184  | 1.10E-12 |
| NME7        | 0.068  | -0.136 | -0.054 | 0.336  | 0.571  | 1.11E-12 |
| CTD-2552B1  | 0.408  | -0.221 | -0.161 | -0.814 | -0.283 | 1.11E-12 |
| PATZ1       | -0.35  | -0.407 | -0.38  | -0.014 | 0.255  | 1.13E-12 |
| SMAP1       | 0.591  | 0.053  | -0.211 | 0.001  | -0.033 | 1.13E-12 |
| IFITM2      | 0.178  | -0.025 | 0.045  | 0.471  | 0.592  | 1.14E-12 |
| ASMTL       | 0.378  | 0.05   | -0.221 | -0.073 | -0.446 | 1.14E-12 |
| PRMT2       | 0.149  | 0.057  | 0.122  | 0.265  | 0.339  | 1.15E-12 |
| RP11-395L1  | 0.186  | 0.156  | 0.154  | 0.293  | -0.528 | 1.15E-12 |
| RHOD        | -0.183 | 0.368  | 0.166  | 0.682  | 1.413  | 1.17E-12 |
| DEPDC5      | -0.346 | 0.081  | -0.027 | -0.342 | -0.52  | 1.17E-12 |
| ARHGEF40    | 0.123  | 0.508  | 0.498  | 0.103  | 0.779  | 1.19E-12 |
| CCDC142     | -0.688 | -0.104 | 0.128  | -0.435 | -0.614 | 1.20E-12 |
| FANCF       | -0.555 | -0.014 | 0.164  | 0.405  | 0.551  | 1.22E-12 |
| NDRG1       | 0.732  | 0.179  | 0.009  | 0.338  | 0.445  | 1.23E-12 |
| NT5DC2      | 0.243  | -0.043 | -0.19  | -0.144 | -0.381 | 1.23E-12 |
| WASH7P      | -0.35  | 0.078  | 0.041  | -0.529 | -0.704 | 1.23E-12 |
| RP5-857K21  | -0.467 | -0.571 | -0.055 | -1.517 | -1.035 | 1.23E-12 |
| ZNF260      | 0.392  | 0.283  | 0.128  | 0.153  | 0.626  | 1.24E-12 |
| REEP4       | -0.519 | -0.549 | -0.576 | -0.447 | -0.556 | 1.26E-12 |
| SERINC5     | 0.209  | 0.612  | 0.349  | 0.03   | 0.503  | 1.27E-12 |
| RP11-147L1  | 0.111  | 0.208  | 0.22   | 0.318  | 0.523  | 1.28E-12 |
| MXD4        | -0.083 | -0.096 | 0.084  | 0.252  | 0.438  | 1.28E-12 |
| RP11-2711.2 | -0.744 | -0.097 | 0.28   | 0.217  | 0.217  | 1.32E-12 |
| RAI1        | -0.162 | -0.183 | -0.086 | 0.002  | 0.391  | 1.33E-12 |
| GDF7        | -0.637 | 0.563  | 0.428  | -0.006 | 0.22   | 1.34E-12 |
| ODF2        | -0.172 | -0.181 | -0.196 | -0.409 | -0.478 | 1.35E-12 |
| MAK16       | 0.003  | 0.029  | -0.125 | -0.017 | -0.45  | 1.36E-12 |
| POLR3F      | 0.194  | 0.129  | -0.078 | -0.063 | -0.42  | 1.38E-12 |
| RNPEP       | 0.214  | 0.075  | 0.058  | 0.382  | 0.681  | 1.43E-12 |
| SYT11       | 0.043  | -0.008 | 0.054  | 0.514  | 0.396  | 1.44E-12 |

|             |        |        |        |        |        |          |
|-------------|--------|--------|--------|--------|--------|----------|
| ZCCHC14     | 0.565  | 0.172  | 0.232  | 0.242  | 0.362  | 1.44E-12 |
| RP11-28911C | 0.013  | -0.103 | -0.069 | 0.147  | 0.629  | 1.45E-12 |
| FASN        | 0.397  | -0.214 | -0.533 | -0.537 | -0.104 | 1.45E-12 |
| TBC1D24     | -0.266 | 0.036  | -0.026 | -0.307 | -0.41  | 1.45E-12 |
| RP11-566E1  | 0.135  | -0.36  | -0.258 | -0.091 | 0.818  | 1.47E-12 |
| ETNK2       | 0.106  | 0.198  | 0.297  | 0.684  | 0.578  | 1.49E-12 |
| HDAC2       | 0.29   | 0.093  | -0.027 | 0.306  | 0.509  | 1.49E-12 |
| RFTN1       | 0.547  | -0.038 | -0.105 | 0.35   | 0.302  | 1.50E-12 |
| ASF1B       | 0.27   | 0.157  | -0.131 | -0.007 | -0.541 | 1.50E-12 |
| OAZ2        | 0.126  | 0.038  | 0.031  | 0.33   | 0.417  | 1.51E-12 |
| MAN2A2      | -0.442 | -0.079 | -0.04  | -0.419 | 0.048  | 1.52E-12 |
| C17orf80    | -0.293 | -0.001 | -0.048 | -0.19  | -0.507 | 1.56E-12 |
| SNAPC4      | -0.501 | -0.007 | -0.101 | -0.663 | -0.109 | 1.57E-12 |
| IL12A       | 0.544  | 1.478  | 1.564  | 0.608  | 1.6    | 1.59E-12 |
| HOOK2       | -0.565 | -0.18  | 0.177  | -0.359 | -0.35  | 1.59E-12 |
| C9orf91     | 0.693  | 0.173  | -0.044 | 0.026  | -0.084 | 1.60E-12 |
| RHOT2       | -0.274 | -0.015 | -0.115 | -0.529 | -0.522 | 1.62E-12 |
| ZNF496      | 0.242  | -0.013 | -0.043 | 0.009  | 0.344  | 1.66E-12 |
| MTIF2       | -0.047 | 0.089  | 0.221  | 0.402  | -0.062 | 1.66E-12 |
| SBNO2       | -0.007 | 0.242  | 0.29   | 0.013  | 0.405  | 1.68E-12 |
| RNASET2     | 0.057  | -0.125 | -0.06  | 0.235  | 0.703  | 1.70E-12 |
| RP5-890O3.9 | -0.584 | -0.032 | 0.212  | -1.099 | -0.93  | 1.71E-12 |
| MAN2B1      | 0.095  | 0.232  | 0.139  | 0.273  | 0.627  | 1.73E-12 |
| EVI2A       | -0.727 | -1.177 | -1.096 | -0.968 | 0.366  | 1.73E-12 |
| SLC35G2     | -0.098 | 0.064  | -0.083 | -0.207 | -0.685 | 1.73E-12 |
| C20orf194   | -0.176 | 0.007  | 0.27   | 0.065  | 0.352  | 1.74E-12 |
| PTBP1       | 0.38   | 0.051  | -0.292 | -0.237 | 0.01   | 1.81E-12 |
| FUS         | 0.378  | 0.031  | -0.185 | -0.195 | -0.181 | 1.85E-12 |
| AP5B1       | 0.393  | 0.103  | -0.065 | -0.181 | -0.184 | 1.85E-12 |
| MND1        | -0.329 | 0.067  | -0.163 | -0.385 | -1.267 | 1.86E-12 |
| SNORA6      | -0.316 | -0.173 | -0.083 | -1.079 | -1.361 | 1.86E-12 |
| ATG7        | 0.173  | 0.138  | 0.226  | 0.533  | 0.525  | 1.89E-12 |
| ZGLP1       | -0.345 | 0.259  | 0.291  | -0.908 | -0.905 | 1.90E-12 |
| GGA2        | -0.136 | -0.148 | -0.208 | -0.533 | -0.303 | 1.96E-12 |
| TMEM144     | -0.097 | 0.67   | 0.904  | 0.123  | 0.714  | 2.00E-12 |
| ATXN7L3B    | 0.162  | 0.07   | -0.088 | 0.286  | 0.423  | 2.00E-12 |
| KBTBD8      | 0.191  | 0.143  | 0.102  | -0.153 | -0.686 | 2.00E-12 |
| TMEM128     | -0.109 | -0.043 | -0.077 | 0.002  | -0.646 | 2.03E-12 |

|             |        |        |        |        |        |          |
|-------------|--------|--------|--------|--------|--------|----------|
| POC5        | -0.429 | -0.394 | -0.345 | -0.298 | -0.962 | 2.04E-12 |
| ARHGEF3     | 0.606  | 0.484  | 0.312  | 0.434  | 0.831  | 2.05E-12 |
| LYPLA2P1    | 0.284  | 0.066  | 0.211  | 0.499  | 0.652  | 2.05E-12 |
| SRPK2       | -0.006 | -0.002 | -0.125 | 0.138  | 0.395  | 2.06E-12 |
| ACAD10      | -0.601 | -0.043 | 0.343  | -0.069 | 0.036  | 2.06E-12 |
| CBARP       | -0.757 | -0.109 | -0.152 | -0.823 | -0.108 | 2.06E-12 |
| DYNC1I2P1   | 0.41   | 0.155  | 0.107  | 0.617  | 0.681  | 2.07E-12 |
| ITGBL1      | -0.007 | -0.039 | -0.002 | 0.288  | 0.531  | 2.08E-12 |
| EVI2B       | 0.048  | -0.951 | -0.827 | -0.152 | -0.247 | 2.09E-12 |
| ACADSB      | -0.103 | 0.156  | 0.049  | 0.342  | 0.461  | 2.10E-12 |
| RP11-331F4  | -0.885 | 0.004  | 0.161  | -1.023 | -0.57  | 2.11E-12 |
| RABGAP1L    | 0.556  | 0.104  | 0.139  | 0.551  | 0.713  | 2.12E-12 |
| CTB-89H12.4 | -0.255 | -0.037 | 0.281  | -0.831 | -0.646 | 2.12E-12 |
| LASP1       | 0.195  | -0.033 | 0.027  | 0.454  | 0.651  | 2.13E-12 |
| EIF2D       | 0.09   | 0.076  | 0.172  | 0.307  | 0.407  | 2.15E-12 |
| HP1BP3      | -0.373 | -0.109 | 0.13   | -0.295 | 0.167  | 2.20E-12 |
| DHX35       | 0.032  | -0.064 | -0.151 | -0.272 | -0.58  | 2.20E-12 |
| F2R         | 0.037  | -0.157 | -0.478 | -0.293 | -0.195 | 2.21E-12 |
| GUF1        | 0.024  | 0.152  | 0.129  | 0.187  | -0.338 | 2.21E-12 |
| ITSN2       | 0.165  | 0.303  | 0.271  | 0.087  | 0.395  | 2.27E-12 |
| LY6G5B      | 0.189  | 0.158  | 0.239  | -0.905 | -0.493 | 2.27E-12 |
| TFB1M       | -0.416 | 0.019  | 0.121  | 0.181  | -0.393 | 2.29E-12 |
| ORC2        | -0.338 | -0.107 | 0.091  | 0.103  | -0.039 | 2.34E-12 |
| UEVLD       | -0.099 | 0.042  | 0.097  | 0.325  | 0.375  | 2.39E-12 |
| SPCS3       | 0.137  | -0.025 | -0.16  | -0.188 | -0.425 | 2.39E-12 |
| WASHC1      | -0.395 | 0.09   | 0.118  | -0.661 | -0.663 | 2.41E-12 |
| CHSY1       | 0.326  | 0.007  | -0.262 | -0.167 | -0.175 | 2.46E-12 |
| POLR3H      | 0.043  | -0.384 | -0.31  | -0.102 | -0.279 | 2.47E-12 |
| CDC42EP4    | 0.698  | 0.032  | 0.225  | 0.61   | 0.427  | 2.51E-12 |
| PLP2        | 0.089  | -0.065 | 0.018  | 0.351  | 0.35   | 2.51E-12 |
| MRPL20      | -0.015 | -0.08  | -0.106 | -0.143 | -0.445 | 2.53E-12 |
| JMJD4       | -0.408 | 0.059  | -0.134 | -0.097 | -0.459 | 2.53E-12 |
| ATXN7L2     | -0.124 | -0.02  | -0.277 | -0.689 | -0.805 | 2.54E-12 |
| INF2        | -0.13  | 0.031  | 0.238  | 0.093  | 0.391  | 2.55E-12 |
| TRMT6       | 0.225  | 0.142  | 0.062  | -0.014 | -0.469 | 2.55E-12 |
| PIGO        | -0.203 | -0.067 | -0.045 | -0.008 | -0.559 | 2.59E-12 |
| ANXA1       | 0.181  | 0.035  | 0.068  | 0.509  | 0.354  | 2.66E-12 |
| PNN         | -0.177 | -0.09  | -0.012 | -0.532 | -0.584 | 2.70E-12 |

|              |        |        |        |        |        |          |
|--------------|--------|--------|--------|--------|--------|----------|
| BMP2K        | -0.025 | -0.124 | 0.065  | 0.094  | 0.421  | 2.76E-12 |
| QRICH2       | -0.675 | -0.02  | 0.412  | -0.116 | 0.707  | 2.86E-12 |
| NFATC2IP     | -0.263 | -0.011 | 0.098  | -0.392 | -0.451 | 2.87E-12 |
| WDR27        | -0.818 | -0.158 | 0.38   | -0.424 | -0.051 | 2.88E-12 |
| MYL5         | -0.275 | 0.315  | 0.366  | -0.435 | -0.466 | 2.89E-12 |
| MEG3         | -0.45  | 0.013  | 0.208  | -0.875 | -0.415 | 2.94E-12 |
| BCL2L2       | -0.384 | 0.066  | -0.039 | -0.73  | -0.561 | 3.02E-12 |
| ALG10        | -0.425 | -0.09  | -0.146 | -0.169 | -0.805 | 3.02E-12 |
| SRPX2        | 0.283  | 0.071  | 0.074  | 0.307  | 0.462  | 3.04E-12 |
| NSD1         | 0.005  | 0.234  | 0.29   | 0.382  | 0.491  | 3.07E-12 |
| SPEN         | 0.372  | 0.044  | -0.044 | -0.184 | -0.061 | 3.08E-12 |
| USP40        | 0.083  | 0.021  | 0.199  | 0.469  | 0.258  | 3.10E-12 |
| ATE1         | 0.136  | 0.025  | 0.04   | 0.301  | 0.503  | 3.14E-12 |
| NSUN5P2      | -1.028 | -0.175 | 0.045  | -0.649 | -0.512 | 3.16E-12 |
| RP11-335I12  | 0.378  | -0.135 | -0.057 | 0.118  | 0.279  | 3.17E-12 |
| SARM1        | -0.193 | -0.102 | 0.285  | 0.037  | 0.448  | 3.23E-12 |
| AGAP4        | -0.523 | -0.074 | 0.038  | -0.932 | -0.495 | 3.27E-12 |
| SECTM1       | 0.012  | 0.229  | 0.512  | 0.961  | 1.437  | 3.36E-12 |
| DPP9         | 0.101  | -0.046 | 0.107  | 0.276  | 0.432  | 3.50E-12 |
| INTS6        | 0.435  | 0.21   | -0.012 | -0.198 | 0.057  | 3.51E-12 |
| CTB-25B13.1  | 0.529  | 0.249  | 0.563  | 1.249  | 1.267  | 3.55E-12 |
| IFT81        | -0.267 | 0.003  | 0.219  | 0.344  | 0.719  | 3.55E-12 |
| RP5-882C2.2  | 0.304  | 0.358  | 0.221  | -0.875 | -1.164 | 3.55E-12 |
| SYF2         | 0.259  | 0.216  | 0.211  | 0.466  | 0.57   | 3.61E-12 |
| NUMA1        | -0.028 | -0.205 | -0.03  | 0.02   | 0.35   | 3.61E-12 |
| SLC16A1      | 0.276  | 0.085  | -0.052 | 0.258  | 0.45   | 3.66E-12 |
| RP11-396K3   | -0.152 | 0.35   | 0.106  | 0.512  | 1.004  | 3.67E-12 |
| NPPA-AS1     | -0.384 | 0.08   | -0.052 | -1.264 | -1.082 | 3.67E-12 |
| TP73-AS1     | -0.439 | 0.161  | 0.234  | -0.407 | -0.136 | 3.68E-12 |
| AC090937.2   | 0.008  | -0.162 | -0.23  | -0.269 | -0.366 | 3.68E-12 |
| CREBZF       | -0.221 | 0.069  | 0.055  | -0.772 | -0.643 | 3.70E-12 |
| EXOC2        | 0.146  | -0.127 | 0.033  | 0.511  | 0.414  | 3.72E-12 |
| GID4         | 0.165  | 0.346  | 0.227  | 0.302  | 0.612  | 3.74E-12 |
| RNF169       | -0.147 | 0.198  | 0.281  | 0.221  | 0.561  | 3.74E-12 |
| CAPN11       | -0.022 | -0.194 | 0.59   | 0.249  | 1.021  | 3.79E-12 |
| RP3-508I15.1 | -0.231 | 0.089  | 0.093  | -0.977 | -1.16  | 3.79E-12 |
| TRIM37       | -0.035 | 0.384  | 0.268  | 0.234  | 0.235  | 3.80E-12 |
| ZNF18        | -0.39  | -0.011 | -0.178 | -0.499 | -0.872 | 3.80E-12 |

|             |        |        |        |        |        |          |
|-------------|--------|--------|--------|--------|--------|----------|
| RP11-1212A  | -0.801 | -0.18  | -0.205 | -1.192 | -0.577 | 3.82E-12 |
| C17orf51    | -0.115 | -0.258 | -0.078 | -0.028 | 0.413  | 3.87E-12 |
| C4orf48     | -0.305 | -0.184 | -0.163 | -0.207 | 0.702  | 3.90E-12 |
| FMN2        | 0.212  | -0.032 | -0.663 | -0.491 | -1.45  | 3.90E-12 |
| IFNGR1      | -0.051 | 0.258  | 0.107  | -0.061 | 0.376  | 3.94E-12 |
| KLHL7       | -0.111 | 0.12   | 0.112  | 0.24   | 0.473  | 3.95E-12 |
| CTD-3099C6  | -0.255 | 0.053  | 0.079  | -0.816 | -0.811 | 4.06E-12 |
| KLHL23      | 0.32   | 0.133  | -0.439 | -0.561 | -0.021 | 4.11E-12 |
| NDC1        | -0.283 | -0.265 | -0.185 | 0.019  | -0.478 | 4.14E-12 |
| SNORD28     | 0.02   | -0.141 | -0.067 | -0.976 | -1.261 | 4.19E-12 |
| HTRA3       | 0.383  | 0.151  | -0.038 | 0.121  | 1.054  | 4.28E-12 |
| GABARAPL1   | 0.442  | 0.482  | 0.252  | 0.341  | 0.291  | 4.28E-12 |
| ABCC5       | -0.745 | -0.233 | -0.05  | -0.641 | -0.272 | 4.28E-12 |
| SEC61B      | 0.015  | -0.057 | -0.04  | -0.162 | -0.47  | 4.29E-12 |
| XXbac-B444l | -0.542 | -0.135 | -0.083 | -1.206 | -1.556 | 4.29E-12 |
| PYCR2       | 0.117  | 0.017  | -0.019 | 0.109  | -0.446 | 4.31E-12 |
| CTU2        | 0.061  | -0.182 | -0.271 | -0.086 | -0.598 | 4.35E-12 |
| FRMD3       | 0.769  | 0.125  | -0.075 | 0.078  | 0.479  | 4.42E-12 |
| PRICKLE2    | 0.844  | -0.157 | -0.34  | -0.122 | 0.015  | 4.42E-12 |
| HNRNPAB     | 0.393  | 0.107  | -0.201 | -0.028 | -0.155 | 4.42E-12 |
| ANKRA2      | 0.396  | 0.76   | 0.692  | 0.174  | 0.326  | 4.43E-12 |
| INPP5B      | -0.138 | 0.099  | 0.115  | -0.125 | -0.43  | 4.46E-12 |
| SRPX        | 0.206  | 0.059  | -0.062 | 0.363  | 0.487  | 4.50E-12 |
| SP110       | 0.293  | 0.245  | 0.334  | 0.652  | 0.885  | 4.51E-12 |
| PTER        | 0.212  | 0.174  | 0.014  | 0.718  | 0.808  | 4.55E-12 |
| ICA1        | 0.06   | 0.213  | 0.503  | 0.439  | 0.347  | 4.55E-12 |
| VPS4B       | 0.373  | 0.279  | 0.213  | 0.464  | 0.62   | 4.56E-12 |
| BTBD2       | 0.054  | -0.098 | -0.082 | 0.27   | 0.585  | 4.56E-12 |
| APPL2       | 0.601  | 0.002  | -0.001 | 0.018  | 0.202  | 4.60E-12 |
| FAM91A1     | 0.155  | 0.295  | 0.238  | 0.165  | 0.442  | 4.62E-12 |
| MAPKAPK3    | 0.027  | -0.098 | -0.103 | 0.138  | 0.372  | 4.66E-12 |
| SLC20A2     | 0.51   | 0.035  | -0.186 | 0.101  | 0.11   | 4.67E-12 |
| TXLNG2P     | -0.599 | -0.06  | 0.153  | -0.864 | -0.628 | 4.69E-12 |
| AARS2       | -0.154 | 0.098  | 0.149  | -0.059 | -0.384 | 4.70E-12 |
| SCML1       | -0.149 | -0.2   | -0.201 | -0.639 | -0.754 | 4.70E-12 |
| CRIP2       | 0.322  | -0.049 | -0.295 | -0.119 | -0.426 | 4.73E-12 |
| FASTK       | -0.311 | 0.016  | -0.017 | -0.285 | -0.425 | 4.75E-12 |
| TMEM57      | 0.411  | 0.08   | -0.167 | -0.043 | 0.165  | 4.78E-12 |

|            |        |        |        |        |        |          |
|------------|--------|--------|--------|--------|--------|----------|
| RP11-500C1 | 0.151  | 0.709  | 0.306  | -0.091 | 0.89   | 4.79E-12 |
| UHRF2      | -0.421 | -0.032 | 0.125  | -0.136 | -0.095 | 4.79E-12 |
| FAM198B    | 0.3    | 0.233  | 0.11   | 0.285  | 0.499  | 4.86E-12 |
| GRPEL2     | -0.075 | 0.333  | 0.487  | 0.006  | 0.319  | 4.88E-12 |
| MKRN1      | 0.307  | 0.14   | 0.098  | 0.465  | 0.665  | 4.90E-12 |
| ANXA2P2    | 0.348  | 0.056  | 0.038  | 0.558  | 0.672  | 4.92E-12 |
| EFEMP1     | 0.17   | 0.04   | -0.02  | 0.421  | 0.506  | 4.94E-12 |
| ZNF75A     | -0.495 | 0.062  | 0.333  | -0.149 | -0.189 | 4.94E-12 |
| DHTKD1     | -0.071 | 0.104  | 0.227  | 0.527  | 0.409  | 5.01E-12 |
| RP11-262A1 | 0.377  | -0.238 | -0.259 | -0.616 | -1.35  | 5.06E-12 |
| BOLA3      | -0.293 | -0.198 | -0.263 | -0.586 | -0.904 | 5.35E-12 |
| RFX7       | 0.161  | 0.37   | 0.226  | 0.076  | 0.438  | 5.41E-12 |
| ALG14      | 0.077  | -0.102 | -0.117 | -0.201 | -0.743 | 5.49E-12 |
| DUS1L      | -0.179 | 0.045  | -0.042 | -0.378 | -0.479 | 5.51E-12 |
| RP11-203I2 | -0.94  | 0.007  | 0.024  | -0.597 | -0.755 | 5.52E-12 |
| ETFDH      | 0.205  | 0.16   | 0.294  | 0.549  | 0.157  | 5.78E-12 |
| MICALL1    | 0.256  | 0.137  | 0.128  | 0.426  | 0.678  | 5.83E-12 |
| PLEKHG2    | -0.358 | -0.192 | -0.227 | -0.68  | -0.422 | 5.83E-12 |
| CCM2L      | -0.105 | -0.521 | 0.194  | 0.177  | 0.055  | 5.85E-12 |
| CCDC88C    | -0.413 | -0.093 | 0.404  | 0.128  | 0.145  | 5.95E-12 |
| MAML1      | 0.317  | -0.058 | -0.155 | -0.007 | 0.332  | 5.96E-12 |
| PHKB       | 0.102  | 0.074  | 0.148  | 0.265  | 0.382  | 5.98E-12 |
| NR2F2      | -0.004 | -0.293 | -0.212 | 0.193  | -0.517 | 6.02E-12 |
| FCHSD1     | -0.278 | 0.145  | 0.161  | -0.419 | -0.375 | 6.05E-12 |
| FIGN       | -0.479 | -0.424 | -0.372 | -0.35  | -0.737 | 6.07E-12 |
| AKTIP      | -0.207 | 0.056  | 0.142  | 0.326  | 0.403  | 6.16E-12 |
| PMCH       | -0.609 | -0.178 | -0.388 | -0.971 | -1.55  | 6.16E-12 |
| SNORD110   | -0.224 | 0.065  | -0.149 | -1.257 | -1.151 | 6.21E-12 |
| CCNT2      | -0.119 | 0.1    | 0.052  | -0.643 | -0.443 | 6.25E-12 |
| LENG8      | -0.521 | -0.015 | 0.11   | -0.827 | -0.505 | 6.26E-12 |
| FURIN      | 0.423  | -0.026 | -0.361 | -0.145 | -0.245 | 6.29E-12 |
| PCSK1      | -0.04  | -0.133 | -0.149 | 0.657  | 1.032  | 6.32E-12 |
| PNO1       | -0.015 | -0.117 | -0.162 | -0.204 | -0.523 | 6.32E-12 |
| ECH1       | 0.213  | -0.074 | -0.057 | 0.334  | 0.522  | 6.52E-12 |
| TRMT13     | -0.357 | -0.026 | 0.149  | -0.221 | -0.571 | 6.55E-12 |
| RP11-1277A | -0.103 | -0.282 | -0.161 | -1.187 | -1.069 | 6.58E-12 |
| ABHD17B    | 0.469  | 0.207  | -0.021 | 0.016  | 0.38   | 6.63E-12 |
| PATL1      | 0.385  | 0.248  | -0.059 | -0.01  | -0.081 | 6.67E-12 |



|            |        |        |        |        |        |          |
|------------|--------|--------|--------|--------|--------|----------|
| MT-ATP8    | -0.437 | -0.348 | 0.234  | -1.192 | -1.082 | 6.72E-12 |
| PLEKHG4    | -0.446 | -0.317 | 0.148  | -0.439 | 0.24   | 6.77E-12 |
| ZNF202     | -0.25  | 0.061  | 0.092  | -0.499 | -0.499 | 6.83E-12 |
| TUSC2      | -0.039 | 0.105  | 0.21   | 0.245  | 0.463  | 6.93E-12 |
| ZNF267     | -0.249 | 0.099  | -0.041 | -0.078 | 0.434  | 6.99E-12 |
| CD58       | -0.008 | 0.057  | -0.154 | -0.893 | -0.828 | 7.01E-12 |
| PPA1       | 0.14   | 0.103  | 0.1    | 0.272  | 0.496  | 7.15E-12 |
| PPP1R3E    | -0.562 | -0.153 | -0.119 | -0.757 | -0.935 | 7.17E-12 |
| TMEM138    | -0.429 | -0.248 | -0.129 | -0.324 | -0.561 | 7.19E-12 |
| KCTD13     | -0.494 | -0.056 | 0.067  | -0.851 | -0.346 | 7.22E-12 |
| SPPL3      | 0.075  | 0.133  | 0.199  | 0.426  | 0.657  | 7.33E-12 |
| TMX1       | 0.092  | 0.072  | -0.063 | -0.018 | -0.363 | 7.39E-12 |
| ZBTB33     | 0.253  | 0.133  | -0.058 | 0.298  | 0.482  | 7.56E-12 |
| PALM       | 0.367  | -0.218 | 0.326  | 0.704  | 1.309  | 7.62E-12 |
| MCOLN1     | -0.037 | 0.042  | -0.242 | -0.157 | -0.57  | 7.62E-12 |
| PIIP5K2    | -0.089 | 0.06   | 0.05   | -0.06  | -0.36  | 7.63E-12 |
| RP11-18C24 | -0.445 | -0.074 | 0.329  | 0.259  | 0.486  | 7.67E-12 |
| TMEM50B    | -0.087 | -0.233 | -0.189 | -0.698 | -0.655 | 7.76E-12 |
| RAPGEF4    | 0.615  | -0.109 | -0.261 | -0.182 | 0.287  | 7.87E-12 |
| VPS25      | 0.031  | -0.111 | 0.044  | 0.176  | -0.333 | 7.89E-12 |
| WSB1       | -0.572 | 0.096  | 0.391  | -0.47  | -0.295 | 8.04E-12 |
| RALGDS     | -0.182 | 0.225  | 0.406  | 0.015  | 0.78   | 8.10E-12 |
| ANKLE1     | -0.702 | -0.278 | -0.317 | -0.815 | -0.716 | 8.11E-12 |
| SCRN3      | 0.068  | 0.011  | 0.126  | 0.478  | 0.339  | 8.12E-12 |
| ALDOC      | 0.193  | 0.066  | -0.218 | 0.048  | -0.852 | 8.15E-12 |
| PIP5K1C    | 0.088  | -0.07  | 0.033  | 0.134  | 0.519  | 8.23E-12 |
| PSMB10     | 0.199  | -0.004 | 0.106  | 0.265  | 0.675  | 8.24E-12 |
| NAPG       | 0.322  | 0.161  | 0.056  | 0.118  | -0.122 | 8.24E-12 |
| URI1       | 0.209  | 0.04   | 0.097  | 0.227  | 0.425  | 8.37E-12 |
| RP11-389C8 | -1.242 | -0.537 | -0.081 | 0.239  | 0.202  | 8.45E-12 |
| SLC7A5     | -0.155 | -0.339 | 0.023  | 0.008  | -0.643 | 8.47E-12 |
| CTD-3252C9 | -0.231 | -0.046 | 0.163  | -0.882 | -0.755 | 8.49E-12 |
| HSPB1      | 0.172  | -0.047 | -0.115 | 0.206  | 0.562  | 8.51E-12 |
| RB1CC1     | 0.257  | 0.314  | 0.243  | 0.405  | 0.594  | 8.59E-12 |
| LRP12      | 0.517  | 0.291  | -0.177 | 0.016  | 0.238  | 8.67E-12 |
| HDDC2      | 0.055  | 0.008  | 0.356  | 0.126  | 1.181  | 8.68E-12 |
| FAM127A    | 0.179  | 0.038  | -0.022 | 0.278  | 0.517  | 8.70E-12 |
| MUM1       | -0.464 | -0.092 | 0.013  | -0.514 | -0.365 | 8.75E-12 |

|             |        |        |        |        |        |          |
|-------------|--------|--------|--------|--------|--------|----------|
| ARL10       | -0.569 | -0.113 | 0.102  | -0.345 | -0.065 | 8.76E-12 |
| TBCCD1      | -0.35  | 0.015  | 0.026  | -0.235 | -0.523 | 9.05E-12 |
| OFD1        | -0.052 | 0.529  | 0.562  | 0.128  | 0.169  | 9.07E-12 |
| AHRR        | 0.526  | 0.087  | 0.573  | 0.306  | -0.045 | 9.14E-12 |
| RP11-97E23  | 0.342  | -0.351 | -0.698 | -0.577 | -0.11  | 9.24E-12 |
| SRSF6       | 0.237  | 0.014  | -0.041 | -0.509 | -0.153 | 9.38E-12 |
| ZBTB25      | -0.53  | 0.081  | 0.176  | -0.406 | -0.6   | 9.42E-12 |
| RP13-122B2  | -0.216 | 0.06   | -0.09  | -0.685 | -0.672 | 9.46E-12 |
| KIAA0907    | -0.296 | -0.028 | 0.16   | -0.497 | -0.559 | 9.53E-12 |
| CASP4       | -0.035 | 0.042  | 0.099  | 0.205  | 0.332  | 9.60E-12 |
| SLC6A8      | 0.407  | -0.003 | -0.269 | -0.218 | 0.024  | 9.84E-12 |
| APBB3       | -0.206 | 0.278  | 0.426  | -0.408 | -0.622 | 9.86E-12 |
| RP11-126F11 | -0.597 | -1.353 | -1.51  | -1.068 | -0.755 | 9.86E-12 |
| GSR         | 0.299  | 0.077  | -0.187 | 0.036  | -0.478 | 9.90E-12 |
| ZNF318      | -0.331 | 0.061  | -0.154 | -0.277 | -0.278 | 9.92E-12 |
| MAPKAPK2    | 0.217  | 0.033  | -0.036 | 0.175  | 0.473  | 1.00E-11 |
| TM9SF3      | 0.364  | 0.056  | -0.184 | 0.058  | -0.08  | 1.03E-11 |
| MDN1        | -0.345 | -0.12  | 0.047  | -0.445 | -0.578 | 1.05E-11 |
| NT5C        | -0.016 | 0.071  | -0.303 | -0.353 | -0.785 | 1.06E-11 |
| ZCCHC6      | -0.093 | 0.26   | 0.188  | 0.026  | 0.414  | 1.08E-11 |
| EPB41L5     | -0.217 | -0.013 | -0.356 | -0.576 | -0.023 | 1.09E-11 |
| MT1E        | 0.071  | -0.17  | 0.125  | 0.352  | 0.301  | 1.10E-11 |
| TMEM194A    | -0.216 | -0.06  | -0.211 | -0.463 | -0.503 | 1.10E-11 |
| AK4         | 0.444  | 0.118  | 0.108  | 0.33   | 0.672  | 1.11E-11 |
| SERPINE1    | 0.42   | 0.19   | 0.129  | 0.511  | 0.576  | 1.11E-11 |
| MIR5047     | -0.656 | 0.261  | 0.236  | -0.811 | -0.561 | 1.11E-11 |
| LIMA1       | 0.256  | 0.122  | 0.004  | 0.397  | 0.589  | 1.12E-11 |
| MORC2       | -0.349 | -0.031 | 0.122  | 0.223  | 0.226  | 1.12E-11 |
| SCNN1D      | -0.707 | 0.359  | 0.899  | 0.102  | 0.667  | 1.13E-11 |
| EHBP1L1     | -0.041 | -0.012 | 0.339  | 0.241  | 0.404  | 1.13E-11 |
| CXorf40B    | 0.105  | 0.045  | -0.061 | -0.025 | -0.45  | 1.13E-11 |
| RAD51       | 0.573  | 0.08   | -0.372 | -0.194 | -0.586 | 1.13E-11 |
| RP11-197N1  | -0.396 | 0.084  | -0.033 | -0.877 | -0.752 | 1.13E-11 |
| DNAH1       | -0.332 | 0.089  | 0.006  | -0.192 | 0.787  | 1.14E-11 |
| CEP44       | -0.668 | -0.179 | -0.174 | -0.484 | -0.654 | 1.14E-11 |
| AC097711.1  | -0.222 | -0.906 | -0.697 | 0.002  | -0.051 | 1.15E-11 |
| CLDND1      | -0.187 | 0.106  | 0.009  | -0.23  | -0.542 | 1.15E-11 |
| CXXC5       | 0.396  | -0.328 | -0.023 | 0.069  | 0.6    | 1.16E-11 |

|           |        |        |        |        |        |          |
|-----------|--------|--------|--------|--------|--------|----------|
| EIF4E     | 0.12   | -0.225 | -0.317 | -0.269 | -0.329 | 1.16E-11 |
| PCF11     | 0.251  | 0.003  | 0.123  | -0.309 | -0.342 | 1.16E-11 |
| POLM      | -0.391 | -0.16  | -0.022 | -0.076 | -0.399 | 1.16E-11 |
| MYZAP     | 0.256  | -0.415 | -0.021 | 0.114  | 0.748  | 1.17E-11 |
| FAM114A1  | 0.41   | 0.172  | 0.179  | 0.394  | 0.625  | 1.17E-11 |
| MYADM     | 0.594  | 0.224  | -0.045 | 0.087  | -0.304 | 1.20E-11 |
| C14orf179 | -0.011 | -0.113 | 0.022  | 0.195  | 0.668  | 1.21E-11 |
| PLOD1     | 0.217  | 0.029  | -0.084 | 0.381  | 0.673  | 1.22E-11 |
| ZNF84     | -0.192 | 0.07   | 0.076  | -0.444 | 0.43   | 1.22E-11 |
| SLC38A1   | 0.195  | -0.083 | 0.017  | 0.305  | 0.331  | 1.25E-11 |
| L2HGDH    | 0.007  | 0.002  | 0.033  | -0.144 | -0.738 | 1.25E-11 |
| ST5       | 0.056  | -0.345 | 0.181  | 0.621  | 0.602  | 1.27E-11 |
| GNE       | 0.605  | 0.323  | 0.133  | 0.219  | 0.277  | 1.27E-11 |
| CCNL1     | -0.307 | 0.12   | 0.011  | -0.757 | -0.584 | 1.27E-11 |
| ZC3H7A    | 0.157  | 0.143  | 0.22   | 0.172  | 0.37   | 1.28E-11 |
| FNBP4     | -0.172 | -0.014 | 0.107  | -0.486 | -0.413 | 1.28E-11 |
| FBXW11    | 0.072  | 0.144  | 0.02   | 0.22   | 0.511  | 1.32E-11 |
| RBMS1     | 0.342  | 0.022  | -0.002 | 0.069  | 0.301  | 1.32E-11 |
| LACC1     | 0.105  | 0.789  | 0.507  | -0.018 | 0.469  | 1.34E-11 |
| LUC7L     | -0.217 | 0.129  | 0.039  | -0.509 | -0.335 | 1.39E-11 |
| STRIP2    | -0.268 | -0.003 | -0.165 | -0.843 | -0.445 | 1.42E-11 |
| AKT2      | -0.358 | -0.099 | -0.014 | -0.389 | -0.446 | 1.42E-11 |
| SEPT10    | 0.207  | 0.087  | 0.073  | 0.328  | 0.362  | 1.45E-11 |
| FOSL1     | 0.669  | 0.275  | 0.329  | 0.362  | 0.188  | 1.47E-11 |
| EEF2K     | -0.11  | -0.406 | -0.03  | 0.114  | 0.064  | 1.47E-11 |
| TESK1     | -0.035 | 0.056  | -0.154 | -0.531 | -0.436 | 1.47E-11 |
| BBS9      | 0.492  | 0.137  | 0.088  | 0.754  | 0.609  | 1.49E-11 |
| CYP20A1   | 0.135  | 0.117  | 0.033  | 0.071  | -0.449 | 1.51E-11 |
| GPR146    | 0.047  | -0.35  | 0.008  | 0.171  | 1.13   | 1.52E-11 |
| NRN1      | -0.262 | -0.129 | -0.127 | -0.149 | -0.571 | 1.52E-11 |
| RTKN2     | -0.557 | -0.36  | -0.295 | -0.661 | -0.889 | 1.52E-11 |
| MAN1A1    | 0.151  | 0.115  | 0.005  | 0.101  | 0.611  | 1.54E-11 |
| TMEM63A   | -0.33  | -0.084 | 0.222  | 0.017  | 0.202  | 1.54E-11 |
| SEPN1     | 0.102  | 0.001  | -0.051 | 0.198  | 0.521  | 1.55E-11 |
| RCN3      | 0.23   | 0.107  | 0.012  | 0.442  | 0.616  | 1.60E-11 |
| GAA       | 0.113  | 0.13   | 0.07   | 0.302  | 0.633  | 1.62E-11 |
| GNPDA2    | 0.12   | 0.129  | -0.175 | -0.153 | -0.355 | 1.62E-11 |
| ITGB1     | 0.323  | 0.153  | -0.008 | 0.401  | 0.532  | 1.64E-11 |

|            |        |        |        |        |        |          |
|------------|--------|--------|--------|--------|--------|----------|
| AFF4       | 0.48   | 0.245  | 0.125  | 0.193  | 0.379  | 1.64E-11 |
| GSE1       | 0.486  | -0.08  | -0.265 | -0.211 | 0.082  | 1.64E-11 |
| TRIB2      | 0.129  | -0.089 | -0.243 | -0.078 | -0.675 | 1.65E-11 |
| ZNF234     | -0.21  | 0.151  | 0.019  | -0.437 | -0.527 | 1.66E-11 |
| RP11-673E1 | 0.914  | 0.01   | -0.05  | -0.046 | -0.312 | 1.68E-11 |
| TBC1D9B    | -0.069 | -0.084 | -0.064 | 0.052  | 0.331  | 1.70E-11 |
| ARHGAP12   | 0.069  | -0.05  | 0.133  | 0.236  | 0.49   | 1.72E-11 |
| AC093673.5 | -0.1   | -0.286 | 0.022  | 0.24   | 0.488  | 1.73E-11 |
| SENP7      | -0.757 | -0.248 | -0.032 | -0.485 | -0.541 | 1.74E-11 |
| HOMER1     | 0.348  | -0.207 | -0.373 | -0.311 | -0.535 | 1.76E-11 |
| EME1       | -0.529 | -0.176 | -0.137 | -0.573 | -0.822 | 1.76E-11 |
| SH2B1      | -0.448 | -0.03  | 0.016  | -0.52  | -0.383 | 1.77E-11 |
| NKTR       | -0.255 | -0.047 | 0.02   | -0.796 | -0.439 | 1.77E-11 |
| RASIP1     | -0.235 | -0.065 | 0.139  | 0.257  | 0.442  | 1.79E-11 |
| TBX20      | 0.907  | 0.068  | -0.022 | 0.315  | -0.147 | 1.81E-11 |
| DOCK8      | 0.472  | 0.51   | 0.45   | 0.558  | 1.419  | 1.82E-11 |
| RYK        | 0.018  | -0.041 | 0.011  | 0.058  | 0.349  | 1.82E-11 |
| POM121C    | 0.368  | 0.117  | -0.049 | -0.153 | -0.129 | 1.84E-11 |
| KRT19      | 0.397  | -0.285 | -0.313 | 0.225  | 0.607  | 1.85E-11 |
| JAK3       | -0.161 | 0.71   | 0.891  | 0.303  | 0.518  | 1.87E-11 |
| ABHD10     | -0.18  | -0.12  | -0.268 | -0.103 | -0.472 | 1.91E-11 |
| PTPRK      | 0.286  | 0.062  | 0.014  | 0.064  | 0.591  | 1.92E-11 |
| C5orf45    | -0.867 | -0.206 | 0.122  | -0.528 | -0.456 | 1.92E-11 |
| SMARCC1    | 0.411  | 0.126  | -0.05  | 0.282  | 0.66   | 1.93E-11 |
| MT-ND3     | -0.48  | -0.356 | 0.247  | -1.202 | -0.935 | 1.93E-11 |
| ARHGAP32   | -0.722 | -0.114 | -0.052 | -0.355 | 0.028  | 1.94E-11 |
| XRN2       | 0.363  | 0.152  | 0.121  | 0.45   | 0.576  | 2.00E-11 |
| FOXC1      | 0.611  | -0.145 | -0.348 | 0.05   | 0.069  | 2.02E-11 |
| MAGOHB     | -0.211 | -0.079 | -0.119 | -0.453 | -0.888 | 2.04E-11 |
| ANKLE2     | -0.028 | 0.05   | -0.043 | -0.364 | -0.309 | 2.06E-11 |
| CDC25C     | -0.447 | -0.739 | -0.488 | 0.079  | -0.071 | 2.07E-11 |
| TXNRD2     | -0.423 | -0.063 | 0.24   | 0.084  | 0.134  | 2.09E-11 |
| PIAS3      | 0.085  | 0.125  | -0.017 | -0.161 | -0.332 | 2.09E-11 |
| GEMIN6     | -0.49  | -0.282 | -0.136 | -0.209 | -0.778 | 2.09E-11 |
| AC024560.3 | -0.229 | -0.05  | 0.083  | -0.643 | -0.698 | 2.14E-11 |
| DCTPP1     | 0.031  | -0.231 | -0.457 | -0.289 | -0.253 | 2.18E-11 |
| CDH4       | -0.01  | -0.122 | -0.165 | 0.168  | 0.718  | 2.22E-11 |
| RSF1       | 0.186  | 0.233  | 0.187  | 0.215  | 0.526  | 2.22E-11 |

|             |        |        |        |        |        |          |
|-------------|--------|--------|--------|--------|--------|----------|
| GNAI1       | 0.597  | 0.015  | -0.165 | 0.258  | 0.431  | 2.23E-11 |
| SDF4        | 0.174  | 0.066  | -0.022 | 0.356  | 0.49   | 2.25E-11 |
| GEMIN8      | -0.056 | -0.177 | 0.163  | 0.359  | 0.603  | 2.26E-11 |
| CENPQ       | 0.016  | 0.067  | -0.305 | -0.465 | -0.786 | 2.27E-11 |
| ACAA1       | -0.09  | 0.017  | -0.023 | 0.01   | 0.339  | 2.28E-11 |
| C6orf1      | -0.377 | -0.208 | -0.072 | 0.121  | -0.321 | 2.31E-11 |
| NUDCD3      | 0.124  | -0.173 | -0.026 | 0.315  | 0.375  | 2.34E-11 |
| PABPC1L     | -0.734 | -0.317 | 0.063  | -0.99  | -0.447 | 2.35E-11 |
| TMEM200B    | 0.31   | -0.278 | -0.824 | -1.003 | -0.752 | 2.36E-11 |
| PRMT3       | -0.119 | -0.148 | -0.039 | 0.109  | -0.591 | 2.38E-11 |
| GNPTG       | 0.082  | 0.089  | 0.023  | 0.062  | 0.385  | 2.39E-11 |
| GTF2IP1     | 0.322  | 0.072  | 0.278  | 0.331  | 0.928  | 2.44E-11 |
| CACNB3      | -0.295 | -0.087 | -0.099 | -0.392 | 0.03   | 2.47E-11 |
| PIM1        | 0.396  | -0.156 | -0.404 | -0.142 | -0.502 | 2.51E-11 |
| MST1        | -0.834 | -0.018 | 0.237  | -0.764 | -0.713 | 2.52E-11 |
| 13-Sep      | -0.405 | -0.11  | -0.205 | -1.042 | -1.132 | 2.55E-11 |
| SOX17       | 0.504  | 0.327  | 0.128  | -0.006 | 0.441  | 2.60E-11 |
| RP11-18B3.2 | -1.056 | -1.274 | -1.359 | -1.162 | -0.635 | 2.64E-11 |
| SNORA40     | -0.133 | 0.124  | 0.125  | -0.623 | -0.845 | 2.73E-11 |
| ANKRD36     | -0.755 | -0.193 | 0.016  | -0.977 | -0.911 | 2.73E-11 |
| STMN1       | -0.212 | -0.066 | 0.091  | 0.212  | 0.353  | 2.75E-11 |
| RP11-884K1  | -0.006 | -0.083 | -0.135 | -0.293 | -0.81  | 2.75E-11 |
| RP11-420L9. | 0.22   | 0.287  | 0.276  | 0.465  | 0.639  | 2.76E-11 |
| RP11-334C1  | -0.524 | 0.085  | 0.467  | -0.363 | -0.789 | 2.78E-11 |
| ZNF697      | 0.143  | 0.386  | 0.323  | 0.313  | 0.601  | 2.79E-11 |
| ATP1B1      | 0.208  | 0.402  | 0.217  | 0.441  | 0.571  | 2.79E-11 |
| C5          | -0.409 | -0.146 | 0.254  | 0.099  | -0.488 | 2.79E-11 |
| MAP3K11     | 0.001  | 0.218  | 0.16   | 0.224  | 0.567  | 2.80E-11 |
| FBN2        | 0.207  | 0.087  | 0.02   | 0.272  | 0.759  | 2.84E-11 |
| RP11-274B2  | -0.295 | 0.05   | -0.096 | -0.916 | -0.665 | 2.86E-11 |
| MAN2B2      | 0.093  | 0.078  | -0.049 | 0.29   | 0.625  | 2.88E-11 |
| KHDRBS1     | 0.337  | 0.134  | -0.003 | 0.511  | 0.727  | 3.01E-11 |
| GHITM       | 0.248  | 0.135  | 0.103  | 0.398  | 0.289  | 3.01E-11 |
| IL15        | -0.049 | 0.746  | 0.866  | 0.542  | 1.459  | 3.03E-11 |
| NFKB1       | 0.108  | 0.584  | 0.117  | 0.226  | 0.543  | 3.03E-11 |
| KIF11       | -0.166 | -0.343 | -0.482 | 0.06   | -0.575 | 3.03E-11 |
| TNFSF12     | -0.17  | -0.19  | -0.121 | 0.108  | 0.559  | 3.04E-11 |
| TPRG1L      | 0.21   | 0.042  | 0.107  | 0.432  | 0.539  | 3.04E-11 |

|             |        |        |        |        |        |          |
|-------------|--------|--------|--------|--------|--------|----------|
| USPL1       | -0.245 | 0.092  | -0.025 | -0.422 | -0.456 | 3.05E-11 |
| COQ5        | 0.035  | -0.119 | 0.025  | 0.438  | 0.215  | 3.07E-11 |
| RP11-392E2  | -0.127 | -0.008 | -0.171 | -0.625 | -1.065 | 3.09E-11 |
| TAF4B       | 0.857  | 1.061  | 0.939  | 0.585  | 0.693  | 3.10E-11 |
| FN3K        | -0.253 | -0.288 | -0.078 | 0.352  | 0.929  | 3.16E-11 |
| MDFIC       | 0.094  | -0.199 | -0.398 | -0.262 | 0.196  | 3.20E-11 |
| SSBP2       | -0.205 | -0.44  | -0.573 | -0.537 | -1.062 | 3.20E-11 |
| RP11-243J11 | -0.618 | -0.449 | -0.354 | -0.533 | -1.218 | 3.21E-11 |
| RP11-137L10 | 0.009  | 0.496  | 0.849  | 0.592  | 0.22   | 3.26E-11 |
| EPAS1       | 0.381  | 0.042  | -0.242 | -0.129 | -0.431 | 3.29E-11 |
| RP11-119K6  | 0.406  | 0.342  | -0.1   | -0.859 | -0.782 | 3.30E-11 |
| NCAPG2      | -0.009 | 0.024  | -0.121 | 0.032  | -0.466 | 3.36E-11 |
| EPB41L2     | 0.052  | 0.153  | 0.174  | 0.095  | 0.432  | 3.37E-11 |
| TNFRSF10A   | 0.323  | 0.393  | 0.485  | 0.299  | 0.424  | 3.39E-11 |
| UACA        | -0.187 | -0.132 | -0.311 | -0.873 | -0.307 | 3.39E-11 |
| ETV1        | 0.118  | -0.315 | 0.278  | 0.394  | 0.881  | 3.42E-11 |
| CCL7        | -0.073 | 1.164  | 1.108  | 0.46   | 1.672  | 3.47E-11 |
| MANBA       | -0.017 | -0.083 | -0.001 | 0.316  | 0.793  | 3.47E-11 |
| IKBIP       | -0.002 | 0.196  | 0.238  | 0.384  | 0.487  | 3.47E-11 |
| TUBGCP3     | 0.184  | -0.162 | -0.218 | -0.012 | -0.394 | 3.51E-11 |
| SLK         | 0.535  | 0.134  | 0.065  | 0.398  | 0.507  | 3.56E-11 |
| FERMT1      | 0.443  | 0.122  | 0.044  | 0.629  | 0.875  | 3.61E-11 |
| ZFYVE27     | -0.173 | 0.056  | -0.164 | -0.559 | -0.48  | 3.63E-11 |
| C1orf159    | -0.336 | 0.04   | -0.085 | -0.479 | -0.634 | 3.63E-11 |
| RASA2       | -0.667 | -0.023 | 0.131  | -0.384 | -0.28  | 3.64E-11 |
| SMAGP       | -0.031 | -0.403 | -0.247 | 0.163  | -0.102 | 3.67E-11 |
| ENKUR       | 0.823  | 0.423  | 0.308  | 0.133  | -0.752 | 3.74E-11 |
| HDHD2       | 0.074  | 0.008  | 0.092  | 0.407  | 0.453  | 3.77E-11 |
| FAM57A      | 0.148  | -0.114 | -0.375 | -0.335 | -0.282 | 3.77E-11 |
| HOXB3       | -0.833 | -0.325 | -0.035 | -0.682 | -0.102 | 3.78E-11 |
| USP35       | -0.355 | 0.17   | 0.143  | -0.547 | -0.486 | 3.84E-11 |
| CPNE8       | -0.052 | 0.285  | 0.516  | 0.421  | 0.435  | 3.85E-11 |
| MRPS25      | -0.357 | -0.037 | 0.041  | -0.472 | -0.482 | 3.85E-11 |
| UBE2D1      | 0.277  | 0.213  | 0.035  | 0.149  | 0.564  | 3.89E-11 |
| FER         | 0.246  | -0.038 | 0.118  | 0.273  | 0.527  | 3.92E-11 |
| TNFRSF6B    | -0.182 | 0.124  | 0.358  | 0.313  | 1.088  | 3.93E-11 |
| SS18L2      | -0.655 | -0.314 | -0.382 | -0.725 | -0.918 | 3.98E-11 |
| MAP2K5      | 0.066  | 0.164  | 0.327  | 0.62   | 0.566  | 4.02E-11 |

|             |        |        |        |        |        |          |
|-------------|--------|--------|--------|--------|--------|----------|
| SIVA1       | -0.312 | -0.194 | -0.24  | -0.517 | -0.775 | 4.02E-11 |
| RBM25       | -0.02  | 0.04   | -0.013 | -0.33  | -0.227 | 4.14E-11 |
| CTD-2530H1  | 0.144  | 0.072  | 0.094  | 0.373  | 0.533  | 4.19E-11 |
| RP11-268J1! | -0.091 | 0.241  | 0.349  | -0.684 | -0.596 | 4.19E-11 |
| RASSF7      | -0.71  | -0.053 | -0.09  | -0.411 | -0.359 | 4.20E-11 |
| C19orf47    | 0.152  | -0.009 | -0.178 | -0.105 | -0.557 | 4.20E-11 |
| RP11-677M1  | -0.454 | 0.088  | 0.195  | -0.722 | -1.169 | 4.20E-11 |
| ZNF792      | -0.558 | -0.09  | 0.296  | 0.41   | 0.451  | 4.24E-11 |
| MRPL51      | -0.101 | -0.137 | -0.074 | -0.083 | -0.442 | 4.27E-11 |
| BIRC2       | 0.422  | 0.219  | 0.053  | -0.153 | -0.324 | 4.37E-11 |
| TRIM45      | -0.688 | -0.145 | -0.048 | -0.861 | -1.053 | 4.37E-11 |
| SNORD45B    | -0.027 | 0.356  | 0.371  | -0.78  | -0.816 | 4.40E-11 |
| C11orf80    | -0.311 | 0.007  | 0.407  | 0.167  | 0.607  | 4.42E-11 |
| RPAP2       | -0.343 | 0.171  | 0.124  | 0.103  | 0.212  | 4.43E-11 |
| ASCC1       | 0.203  | 0.035  | 0.092  | 0.479  | 0.192  | 4.43E-11 |
| RP3-393P12  | 0.106  | 0.13   | 0.212  | 0.216  | 0.801  | 4.47E-11 |
| PIP4K2A     | 0.164  | -0.164 | -0.021 | 0.123  | 0.393  | 4.48E-11 |
| RP11-206L10 | -0.394 | -0.012 | 0.135  | -0.767 | -0.817 | 4.52E-11 |
| RP11-644F5  | -0.736 | -0.014 | 0.247  | 0.164  | -0.113 | 4.54E-11 |
| GOLGA8A     | -0.433 | 0.049  | 0.235  | -0.702 | -0.34  | 4.54E-11 |
| RP5-1100H1  | 0.063  | -0.083 | -0.532 | -0.97  | -1.312 | 4.56E-11 |
| RP11-378A1  | 0.687  | 0.246  | 0.369  | 0.651  | 1.424  | 4.57E-11 |
| RP11-123M2  | 0.389  | -0.096 | -0.061 | -0.035 | 0.819  | 4.58E-11 |
| GATS        | -0.604 | 0.217  | 0.267  | 0.143  | 0.835  | 4.59E-11 |
| MBOAT1      | -0.241 | 0.075  | 0.094  | -0.682 | -1.08  | 4.65E-11 |
| AQP3        | 0.172  | 0.175  | 0.349  | 0.653  | -0.981 | 4.66E-11 |
| TBC1D23     | 0.331  | 0.312  | 0.122  | 0.343  | 0.487  | 4.68E-11 |
| SLC25A17    | 0.079  | 0.091  | -0.171 | -0.106 | -0.379 | 4.71E-11 |
| E4F1        | -0.339 | -0.042 | -0.15  | -0.541 | -0.473 | 4.75E-11 |
| PRKAG1      | 0.172  | 0.047  | 0.215  | 0.433  | 0.223  | 4.76E-11 |
| RTTN        | -0.06  | 0.092  | -0.133 | -0.207 | -0.435 | 4.76E-11 |
| SNORA18     | -0.119 | 0.037  | 0.095  | -0.8   | -0.867 | 4.77E-11 |
| UHRF1BP1L   | 0.48   | 0.264  | 0.01   | 0.07   | -0.038 | 4.79E-11 |
| NEXN        | 0.43   | 0.202  | -0.035 | 0.087  | -0.523 | 4.81E-11 |
| HAUS6       | -0.137 | -0.109 | -0.266 | -0.308 | -0.432 | 4.93E-11 |
| TMEM184B    | 0.207  | -0.077 | -0.064 | 0.164  | 0.464  | 4.95E-11 |
| AASS        | -0.633 | -0.179 | -0.198 | -0.48  | -0.649 | 4.97E-11 |
| TGS1        | 0.569  | 0.207  | -0.036 | 0.146  | 0.089  | 4.99E-11 |

|            |        |        |        |        |        |          |
|------------|--------|--------|--------|--------|--------|----------|
| TJP2       | 0.534  | 0.038  | 0.151  | 0.542  | 1.003  | 5.00E-11 |
| MYO10      | 0.304  | 0.02   | 0.151  | 0.263  | 0.431  | 5.02E-11 |
| MIS18A     | -0.095 | -0.176 | -0.32  | -0.115 | -0.606 | 5.04E-11 |
| RP11-569G1 | 0.24   | 0.11   | 0.33   | 0.505  | 0.57   | 5.06E-11 |
| DXO        | -0.288 | 0.103  | 0.038  | -0.261 | -0.43  | 5.13E-11 |
| AL449209.1 | -1.407 | -0.456 | -0.134 | -0.481 | -0.397 | 5.22E-11 |
| CASP9      | -0.193 | 0.163  | 0.16   | 0.541  | 0.265  | 5.23E-11 |
| ZNF281     | 0.355  | 0.194  | 0.126  | 0.253  | 0.58   | 5.25E-11 |
| AC002056.3 | 0.077  | 0.017  | -0.142 | 0.116  | -0.677 | 5.26E-11 |
| SOS2       | 0.38   | 0.22   | 0.163  | 0.124  | 0.508  | 5.27E-11 |
| NBEAL2     | -0.533 | -0.356 | 0.282  | -0.315 | -0.148 | 5.28E-11 |
| TMEM120A   | -0.343 | 0.137  | 0.059  | 0.089  | -0.347 | 5.28E-11 |
| RP11-242D8 | -0.734 | -0.076 | 0.086  | -0.762 | -0.771 | 5.28E-11 |
| OSBPL5     | -0.157 | -0.017 | 0.352  | 0.224  | 0.424  | 5.30E-11 |
| BCL7A      | 0.526  | 0.033  | 0.099  | 0.259  | 0.632  | 5.33E-11 |
| INO80C     | -0.121 | 0.071  | 0.324  | 0.161  | 0.554  | 5.58E-11 |
| NEDD9      | 0.619  | 0.197  | -0.015 | -0.06  | 0.242  | 5.62E-11 |
| PIGH       | -0.203 | -0.008 | 0.084  | -0.18  | -0.733 | 5.62E-11 |
| CDH24      | -0.093 | -0.097 | -0.143 | -0.546 | -0.398 | 5.67E-11 |
| VPS8       | -0.02  | 0.117  | 0.244  | 0.353  | 0.372  | 5.77E-11 |
| VASH1      | -0.764 | -0.66  | -0.252 | -0.849 | -0.334 | 5.85E-11 |
| WBSCR22    | 0.17   | 0.024  | -0.157 | 0.039  | -0.327 | 5.88E-11 |
| ANXA2      | 0.328  | 0.096  | 0.037  | 0.534  | 0.649  | 5.91E-11 |
| BMS1P1     | -0.416 | 0.006  | 0.425  | -0.687 | -0.743 | 5.96E-11 |
| FAM127B    | 0.186  | 0.125  | 0.176  | 0.498  | 0.644  | 5.99E-11 |
| ITGB1P1    | 0.326  | 0.115  | -0.01  | 0.433  | 0.542  | 6.06E-11 |
| GBA        | 0.168  | 0.116  | 0.07   | 0.495  | 0.535  | 6.13E-11 |
| BEX4       | 0.308  | 0.249  | 0.121  | 0.512  | 0.662  | 6.29E-11 |
| C21orf91   | 0.37   | 0.206  | -0.205 | -0.366 | -0.317 | 6.32E-11 |
| ZNF117     | -0.387 | 0.062  | 0.153  | -0.784 | -0.562 | 6.33E-11 |
| SUN2       | -0.075 | -0.254 | -0.369 | 0.01   | 0.299  | 6.34E-11 |
| CSGALNACT1 | 0.352  | 0.106  | -0.05  | -0.032 | -0.012 | 6.47E-11 |
| CEP290     | -0.127 | 0.252  | 0.323  | 0.278  | 0.132  | 6.50E-11 |
| CDC42EP5   | -0.142 | -0.248 | -0.096 | 0.104  | 0.4    | 6.60E-11 |
| CTD-2509G1 | 0.534  | 0.042  | -0.314 | -0.112 | -0.047 | 6.62E-11 |
| GLI4       | -0.715 | 0.025  | 0.164  | -0.484 | -0.705 | 6.62E-11 |
| IRF2BPL    | 0.328  | 0.361  | 0.465  | 0.692  | 0.742  | 6.64E-11 |
| CTDSPL     | -0.175 | -0.231 | -0.187 | -0.05  | 0.338  | 6.66E-11 |



|             |        |        |        |        |        |          |
|-------------|--------|--------|--------|--------|--------|----------|
| CTA-360L10  | -0.559 | -0.139 | 0.605  | 0.248  | 1.152  | 6.71E-11 |
| TAX1BP3     | 0.251  | 0.122  | 0.11   | 0.261  | 0.355  | 6.92E-11 |
| PLEKHF1     | -0.493 | 0.261  | 0.319  | 0.636  | 0.867  | 6.98E-11 |
| YTHDF3      | 0.399  | 0.149  | 0.009  | 0.168  | 0.305  | 7.00E-11 |
| RP11-291L1  | 0.014  | -0.281 | -0.202 | -0.136 | -0.51  | 7.02E-11 |
| NT5C2       | 0.119  | 0.041  | 0.063  | 0.07   | 0.364  | 7.04E-11 |
| VRK1        | 0.056  | 0.057  | -0.275 | -0.045 | -0.388 | 7.05E-11 |
| AGPAT4      | -0.307 | -0.106 | 0.17   | -0.07  | 0.479  | 7.12E-11 |
| SNORD5      | -0.556 | 0.014  | -0.005 | -1.042 | -1.029 | 7.14E-11 |
| GNG12       | 0.346  | -0.002 | -0.103 | 0.134  | 0.236  | 7.23E-11 |
| PRRC2B      | 0.073  | -0.036 | 0.014  | 0.107  | 0.423  | 7.26E-11 |
| SLC9A8      | -0.059 | 0.162  | 0.116  | -0.238 | -0.337 | 7.28E-11 |
| RNASEH2B    | -0.066 | 0.031  | -0.029 | -0.323 | -0.46  | 7.30E-11 |
| RAB6B       | -0.088 | -0.355 | 0.158  | 0.193  | 0.926  | 7.32E-11 |
| CCL14       | -0.462 | 0.042  | 0.052  | -0.04  | 0.549  | 7.34E-11 |
| MCUR1       | 0.273  | 0.032  | -0.115 | -0.13  | -0.334 | 7.38E-11 |
| CCDC81      | -0.054 | 0.013  | 0.588  | 0.373  | 1.415  | 7.39E-11 |
| HCFC2       | -0.218 | -0.019 | -0.135 | -0.363 | -0.523 | 7.40E-11 |
| CDPF1       | -0.588 | -0.124 | -0.188 | -0.401 | -0.687 | 7.40E-11 |
| FYTTD1      | 0.217  | 0.064  | -0.078 | 0.175  | 0.44   | 7.41E-11 |
| PHYKPL      | -0.385 | 0.17   | 0.366  | -0.17  | -0.036 | 7.45E-11 |
| MT-TS1      | -0.478 | -0.023 | 0.364  | -1.031 | -0.909 | 7.46E-11 |
| ANXA6       | 0.397  | 0.048  | -0.02  | 0.455  | 0.773  | 7.47E-11 |
| C14orf79    | -0.835 | -0.096 | -0.019 | -0.679 | -0.255 | 7.56E-11 |
| FKBP5       | 0.461  | 0.118  | -0.189 | -0.065 | -0.389 | 7.61E-11 |
| SDC3        | 0.199  | 0.244  | 0.21   | 0.536  | 0.636  | 7.66E-11 |
| BCAR1       | -0.426 | -0.002 | 0.062  | 0.235  | 0.264  | 7.66E-11 |
| CTB-175E5.4 | -0.507 | 0.06   | 0.011  | -0.527 | -0.472 | 7.66E-11 |
| ZRANB1      | 0.405  | 0.204  | 0.016  | 0.057  | 0.288  | 7.85E-11 |
| UQCC1       | -0.064 | 0.308  | 0.398  | 0.256  | 0.258  | 7.85E-11 |
| EIF2AK1     | 0.303  | 0.079  | -0.013 | 0.298  | 0.457  | 8.08E-11 |
| NCK2        | 0.162  | -0.046 | -0.203 | 0.029  | 0.575  | 8.22E-11 |
| PGD         | 0.397  | 0.19   | 0.077  | 0.526  | 0.757  | 8.28E-11 |
| ALG5        | -0.134 | -0.179 | -0.172 | -0.353 | -0.802 | 8.30E-11 |
| NCKAP1      | 0.32   | 0.102  | -0.006 | 0.323  | 0.542  | 8.39E-11 |
| SLC25A21-A  | -0.192 | 0.135  | -0.179 | -0.209 | -1.429 | 8.42E-11 |
| LATS2       | 0.424  | 0.174  | 0.28   | 0.374  | 0.441  | 8.56E-11 |
| RBM39       | 0.091  | 0.123  | 0.099  | -0.342 | -0.315 | 8.63E-11 |

|             |        |        |        |        |        |          |
|-------------|--------|--------|--------|--------|--------|----------|
| ELMOD3      | -0.573 | 0.091  | 0.142  | -0.383 | -0.281 | 8.68E-11 |
| RP11-274B2  | -0.176 | 0.073  | 0.036  | -0.75  | -0.665 | 8.70E-11 |
| NPTN-IT1    | -0.414 | -0.107 | -0.109 | -1.238 | -0.837 | 8.75E-11 |
| EFNA4       | -0.1   | -0.126 | -0.285 | -0.13  | 0.481  | 8.80E-11 |
| TAF5        | 0.149  | -0.041 | -0.298 | -0.22  | -0.57  | 8.80E-11 |
| INTS6L      | -0.148 | 0.177  | 0.102  | -0.741 | -0.796 | 8.98E-11 |
| ZBTB47      | -0.42  | -0.214 | -0.034 | -0.502 | -0.186 | 9.02E-11 |
| NPC2        | -0.14  | -0.152 | -0.018 | 0.015  | 0.41   | 9.17E-11 |
| RP1-167F1.1 | 0.102  | 0.069  | 0.212  | 0.606  | 1.193  | 9.26E-11 |
| CDAN1       | -0.37  | -0.086 | -0.199 | -0.523 | -0.425 | 9.30E-11 |
| HADHA       | 0.325  | 0.201  | 0.148  | 0.542  | 0.753  | 9.32E-11 |
| TMEM87B     | 0.04   | 0.105  | 0.157  | 0.146  | 0.425  | 9.33E-11 |
| ARFGEF1     | 0.045  | 0.165  | 0.056  | 0.301  | 0.404  | 9.38E-11 |
| PAGR1       | -0.25  | -0.353 | -0.239 | -0.047 | -0.973 | 9.43E-11 |
| GPR173      | -0.344 | -0.123 | -0.054 | -0.772 | -0.482 | 9.65E-11 |
| PACS1       | 0.321  | -0.081 | -0.207 | 0.013  | 0.396  | 9.71E-11 |
| GGT5        | -0.713 | -0.279 | 0.032  | 0.086  | -0.592 | 9.76E-11 |
| TRAPPC5     | -0.36  | -0.055 | -0.062 | -0.215 | 0.962  | 9.78E-11 |
| PAPSS2      | 0.402  | 0.155  | -0.132 | 0.146  | -1.133 | 9.78E-11 |
| SLC35E3     | 0.119  | 0.437  | 0.485  | 0.284  | 0.524  | 9.98E-11 |
| ARID5B      | 0.585  | 0.355  | -0.02  | 0.096  | 0.552  | 1.00E-10 |
| BAZ2B       | -0.094 | 0.139  | 0.124  | 0.022  | 0.448  | 1.00E-10 |
| MCM2        | 0.487  | 0.072  | -0.443 | -0.373 | -0.851 | 1.01E-10 |
| APLP1       | 0.264  | 0.528  | 0.481  | 0.905  | 0.726  | 1.04E-10 |
| H2AFY       | 0.173  | 0.076  | 0.071  | 0.331  | 0.434  | 1.04E-10 |
| ZCCHC24     | 0.179  | -0.127 | 0.169  | 0.27   | 0.687  | 1.05E-10 |
| SEC31A      | 0.493  | 0.214  | 0.18   | 0.559  | 0.816  | 1.06E-10 |
| PPP1R16A    | -0.656 | -0.085 | -0.046 | -0.339 | -0.28  | 1.06E-10 |
| DDIT3       | -0.854 | -0.038 | -0.089 | -0.597 | -0.385 | 1.06E-10 |
| CAMK1       | -0.117 | 0.12   | 0.124  | 0.309  | 0.425  | 1.07E-10 |
| AC137932.6  | -0.052 | -0.073 | 0.858  | 1.04   | 0.927  | 1.08E-10 |
| CHCHD7      | -0.148 | 0.052  | -0.132 | -0.426 | -0.674 | 1.08E-10 |
| RP3-425C14  | 0.618  | -0.133 | -0.197 | -0.102 | 0.878  | 1.09E-10 |
| IQGAP1      | 0.357  | 0.176  | 0.111  | 0.397  | 0.698  | 1.09E-10 |
| PMPCB       | 0.246  | 0.079  | 0.067  | 0.27   | 0.434  | 1.09E-10 |
| BRICD5      | -0.631 | -0.283 | 0.005  | -1.078 | -0.629 | 1.10E-10 |
| BTBD11      | 0.683  | 0.005  | -0.23  | 0.024  | 0.819  | 1.15E-10 |
| NLGN2       | -0.214 | 0.105  | 0.057  | -0.34  | -0.253 | 1.15E-10 |

|            |        |        |        |        |        |          |
|------------|--------|--------|--------|--------|--------|----------|
| ZFAND2A    | 0.003  | 0.03   | -0.046 | -0.439 | -0.617 | 1.16E-10 |
| MIIP       | -0.759 | -0.358 | -0.252 | -0.491 | -0.561 | 1.17E-10 |
| LMCD1      | 0.153  | -0.486 | -0.405 | -0.157 | 0.417  | 1.18E-10 |
| SLC43A1    | -0.576 | -0.296 | -0.423 | -0.716 | -0.481 | 1.18E-10 |
| PSTPIP1    | -0.114 | -0.412 | 0.221  | 0.185  | 0.906  | 1.19E-10 |
| KCNN4      | 0.334  | 0.065  | 0.567  | 0.869  | 1.165  | 1.20E-10 |
| RGL3       | -0.328 | 0.071  | 0.471  | -0.45  | -0.587 | 1.21E-10 |
| MZT1       | -0.468 | -0.473 | -0.502 | -0.799 | -0.876 | 1.21E-10 |
| SLC35G1    | 0.093  | 0.115  | -0.411 | -0.495 | -0.895 | 1.21E-10 |
| FOPNL      | -0.159 | -0.251 | -0.311 | -0.426 | -0.656 | 1.22E-10 |
| MAGI3      | -0.327 | -0.149 | -0.455 | -0.453 | -0.671 | 1.22E-10 |
| SCARA3     | 0.078  | -0.081 | -0.132 | 0.215  | 0.507  | 1.23E-10 |
| PPAT       | 0.009  | -0.186 | -0.339 | -0.31  | -0.394 | 1.24E-10 |
| SLC25A22   | -0.031 | -0.183 | -0.341 | -0.441 | -0.564 | 1.24E-10 |
| RPL21      | -0.109 | -0.072 | 0.059  | -0.637 | -0.775 | 1.24E-10 |
| ANKRD28    | -0.004 | 0.097  | 0.34   | 0.339  | 0.297  | 1.25E-10 |
| ARHGEF17   | -0.232 | -0.011 | 0.105  | -0.347 | 0.096  | 1.25E-10 |
| RAB42      | 0.058  | -0.354 | -0.41  | -0.208 | 1.026  | 1.27E-10 |
| FAM171B    | 0.204  | 0.266  | 0.159  | 0.13   | 0.618  | 1.28E-10 |
| CREBRF     | -0.125 | 0.484  | 0.206  | -0.044 | 0.601  | 1.28E-10 |
| GS1-44D20. | 0.334  | -0.084 | -0.147 | -0.029 | -0.032 | 1.28E-10 |
| LPCAT1     | 0      | -0.177 | -0.291 | -0.37  | -0.131 | 1.28E-10 |
| WIPI1      | 0.347  | 0.034  | -0.034 | 0.083  | 0.293  | 1.31E-10 |
| TPM4       | 0.335  | 0.036  | -0.119 | 0.028  | 0.151  | 1.31E-10 |
| JMY        | 0.101  | 0.265  | 0.345  | 0.148  | 0.615  | 1.33E-10 |
| STX16      | -0.36  | 0.058  | 0.24   | -0.392 | -0.286 | 1.34E-10 |
| GLTP       | 0.269  | 0.133  | 0.104  | 0.408  | 0.346  | 1.35E-10 |
| SLC23A3    | -0.598 | 0.174  | 0.788  | -0.402 | -0.184 | 1.36E-10 |
| MTMR1      | 0.091  | 0.269  | 0.281  | 0.303  | 0.384  | 1.37E-10 |
| ADNP2      | 0.472  | 0.034  | -0.059 | 0.141  | 0.315  | 1.38E-10 |
| PORCN      | 0.118  | 0.002  | -0.151 | -0.277 | -0.42  | 1.38E-10 |
| CDC40      | 0.231  | 0.189  | 0.112  | 0.478  | 0.468  | 1.40E-10 |
| NFKBIZ     | 0.182  | 0.354  | 0.25   | -0.798 | 0.237  | 1.40E-10 |
| HMGB3      | 0.251  | -0.153 | -0.362 | -0.07  | 0.076  | 1.40E-10 |
| ACP6       | -0.882 | -0.04  | 0.07   | -0.574 | -0.419 | 1.41E-10 |
| PKM        | 0.362  | 0.117  | 0.089  | 0.569  | 0.833  | 1.42E-10 |
| THADA      | 0.231  | -0.076 | 0.25   | 0.446  | 0.269  | 1.42E-10 |
| PPIP5K1    | -0.307 | 0.046  | 0.188  | -0.24  | -0.466 | 1.42E-10 |

|            |        |        |        |        |        |          |
|------------|--------|--------|--------|--------|--------|----------|
| GALNT18    | 0.115  | 0.051  | 0.182  | 0.331  | 0.962  | 1.43E-10 |
| HYAL3      | 0.087  | 0.118  | 0.349  | 0.47   | 0.803  | 1.43E-10 |
| POU4F1     | -0.29  | -0.177 | -0.275 | -0.829 | -0.411 | 1.44E-10 |
| GLCCI1     | 0.052  | 0.39   | 0.235  | 0.232  | 0.891  | 1.45E-10 |
| NSUN5P1    | -1.025 | -0.406 | -0.098 | -0.95  | -0.668 | 1.45E-10 |
| DCTD       | 0.128  | 0.064  | 0.066  | 0.202  | 0.325  | 1.46E-10 |
| NUP155     | 0.325  | 0.144  | -0.013 | 0.223  | -0.357 | 1.47E-10 |
| HIBCH      | 0.037  | -0.034 | 0.086  | 0.308  | 0.459  | 1.48E-10 |
| PKD1P6     | -0.527 | -0.336 | -0.311 | -1.226 | -0.558 | 1.48E-10 |
| RP11-172H2 | 0.153  | -0.042 | 0.082  | 0.251  | 0.738  | 1.50E-10 |
| PEA15      | 0.216  | 0.004  | -0.023 | 0.233  | 0.389  | 1.51E-10 |
| HSPA1A     | -0.925 | -0.313 | -0.185 | 0.122  | 0.077  | 1.51E-10 |
| GPRIN1     | 0.568  | 0.184  | -0.161 | 0.106  | 0.493  | 1.53E-10 |
| MAP1S      | 0.223  | -0.094 | 0.208  | 0.49   | 0.639  | 1.54E-10 |
| STX12      | 0.092  | 0.161  | 0.167  | 0.205  | 0.434  | 1.56E-10 |
| AC004381.6 | -0.639 | 0.071  | 0.088  | -0.132 | -0.528 | 1.57E-10 |
| RP11-354P1 | 0.245  | -0.075 | -0.111 | -0.533 | 0.632  | 1.58E-10 |
| NCRNA0010  | -0.671 | -0.066 | 0.252  | -0.717 | -0.366 | 1.58E-10 |
| IGFBP6     | 0.181  | 0.072  | 0.037  | 0.221  | 0.759  | 1.59E-10 |
| MYH10      | 0.139  | -0.049 | -0.15  | 0.212  | 0.692  | 1.59E-10 |
| PFKP       | 0.351  | -0.024 | -0.142 | 0.247  | 0.59   | 1.59E-10 |
| MAN2C1     | -0.328 | -0.023 | 0.062  | -0.594 | -0.493 | 1.59E-10 |
| MTHFD2     | 0.356  | 0.084  | -0.135 | 0.058  | -0.143 | 1.63E-10 |
| ZCCHC9     | -0.343 | -0.069 | -0.011 | -0.345 | -0.68  | 1.66E-10 |
| TRPT1      | -0.553 | -0.116 | 0.109  | -0.146 | -0.263 | 1.68E-10 |
| RORA       | 0.357  | 0.115  | -0.029 | -0.473 | -0.282 | 1.71E-10 |
| KDM5D      | -0.389 | 0.03   | 0.107  | -0.4   | -0.466 | 1.71E-10 |
| TMEM54     | 0.143  | 0.116  | 0.116  | 0.281  | 0.519  | 1.73E-10 |
| MRPL17     | -0.125 | -0.34  | -0.261 | -0.146 | -0.294 | 1.73E-10 |
| SLC44A5    | -0.176 | -0.197 | -0.143 | -0.469 | 0.256  | 1.77E-10 |
| ELK3       | 0.33   | 0.079  | 0.188  | 0.495  | 0.395  | 1.80E-10 |
| ILKAP      | 0.09   | -0.1   | -0.183 | -0.21  | -0.363 | 1.81E-10 |
| PCYT2      | -0.023 | -0.288 | -0.444 | -0.475 | -0.268 | 1.82E-10 |
| AC097639.4 | -0.036 | -0.438 | 0.034  | 0.559  | 0.967  | 1.84E-10 |
| ZNF696     | -0.691 | 0.2    | 0.014  | -0.152 | -0.11  | 1.86E-10 |
| CORO1B     | -0.042 | 0.091  | 0.07   | 0.428  | 0.538  | 1.87E-10 |
| BTN2A2     | 0.063  | 0.409  | 0.305  | 0.161  | 0.579  | 1.90E-10 |
| GTF2IRD2B  | 0.524  | 0.199  | 0.591  | 0.686  | 1.386  | 1.92E-10 |

|            |        |        |        |        |        |          |
|------------|--------|--------|--------|--------|--------|----------|
| TNPO1      | 0.148  | 0.117  | -0.087 | -0.016 | -0.333 | 1.94E-10 |
| CPEB4      | 0.604  | 0.322  | 0.076  | 0.096  | 0.226  | 1.95E-10 |
| COL18A1    | 0.313  | 0.08   | -0.065 | 0.287  | 0.656  | 1.98E-10 |
| RNF111     | 0.413  | 0.236  | 0.018  | 0.005  | 0.329  | 1.98E-10 |
| ACO1       | 0.27   | 0.132  | 0.104  | 0.585  | 0.791  | 2.00E-10 |
| DENND5A    | 0.132  | 0.087  | 0.049  | 0.163  | 0.42   | 2.00E-10 |
| CEP72      | -0.249 | 0.062  | -0.169 | -0.323 | -0.922 | 2.02E-10 |
| PRKD1      | -0.135 | -0.204 | -0.372 | -0.749 | -0.338 | 2.04E-10 |
| RP11-568G1 | 0.289  | 0.099  | 0.056  | 0.384  | 0.346  | 2.07E-10 |
| ANKRD49    | -0.292 | 0.099  | 0.043  | -0.465 | -0.678 | 2.13E-10 |
| ADCK3      | 0.262  | 0.752  | 0.67   | 0.666  | 0.689  | 2.14E-10 |
| MAPK1      | 0.247  | 0.05   | -0.003 | 0.286  | 0.485  | 2.14E-10 |
| LRRC27     | -0.846 | -0.139 | -0.043 | -0.644 | 0.039  | 2.14E-10 |
| SEC31B     | -0.798 | -0.096 | 0.196  | -0.731 | -0.069 | 2.14E-10 |
| HYAL1      | 0.054  | 0.094  | 0.243  | 0.277  | 0.467  | 2.17E-10 |
| MIER1      | -0.051 | -0.034 | -0.169 | -0.311 | -0.437 | 2.19E-10 |
| MTRF2      | -0.273 | -0.285 | -0.43  | -0.16  | -0.759 | 2.19E-10 |
| GHRLOS     | -0.561 | 0.05   | 0.125  | -1.33  | -0.929 | 2.22E-10 |
| RAP1GDS1   | 0.175  | -0.048 | -0.053 | 0.269  | 0.4    | 2.25E-10 |
| DUSP12     | 0.067  | -0.143 | -0.16  | -0.324 | -0.445 | 2.28E-10 |
| RP11-157P1 | -0.655 | -0.441 | 0.311  | -0.529 | -0.811 | 2.28E-10 |
| NEIL1      | -0.867 | -0.204 | 0.045  | -0.703 | -0.593 | 2.30E-10 |
| CHFR       | -0.016 | 0.079  | -0.107 | -0.37  | -0.184 | 2.31E-10 |
| KIAA1147   | 0.218  | 0.2    | 0.083  | -0.328 | 0.539  | 2.33E-10 |
| MEGF9      | 0.052  | 0.253  | -0.043 | -0.064 | 0.377  | 2.33E-10 |
| RP11-488L1 | -0.361 | 0.082  | 0.28   | -0.789 | -0.328 | 2.34E-10 |
| ADCK5      | -0.565 | -0.032 | -0.138 | -0.739 | -0.705 | 2.36E-10 |
| EIF3LP2    | 0.314  | 0.047  | 0.154  | 0.514  | 0.707  | 2.37E-10 |
| ERCC6L     | 0.051  | -0.252 | -0.292 | 0.11   | -0.621 | 2.37E-10 |
| ZNF276     | -0.159 | -0.038 | 0.255  | -0.397 | -0.484 | 2.38E-10 |
| RP11-386C2 | -0.715 | -0.641 | -0.565 | -0.622 | -1.028 | 2.41E-10 |
| ZNF783     | -0.427 | -0.111 | 0.093  | -0.363 | -0.544 | 2.42E-10 |
| ZNF528     | -0.235 | 0.081  | 0.304  | 0.126  | 0.59   | 2.46E-10 |
| CYB5D2     | 0.12   | 0.135  | 0.258  | 0.543  | 0.315  | 2.46E-10 |
| PHGDH      | 0.062  | -0.015 | 0.119  | 0.706  | 0.739  | 2.47E-10 |
| DUSP14     | 0.146  | 0.268  | 0.324  | 0.504  | 0.579  | 2.47E-10 |
| CTBP2      | 0.14   | -0.009 | 0.131  | 0.306  | 0.509  | 2.47E-10 |
| MIRLET7BH  | -0.611 | -0.278 | -0.395 | -0.962 | -1.009 | 2.48E-10 |

|            |        |        |        |        |        |          |
|------------|--------|--------|--------|--------|--------|----------|
| RP11-186B7 | -0.111 | -0.052 | -0.088 | -0.562 | -0.607 | 2.50E-10 |
| MOB1B      | 0.31   | 0.326  | 0.096  | 0.033  | 0.385  | 2.51E-10 |
| CLCN6      | -0.325 | -0.043 | -0.07  | -0.685 | -0.313 | 2.51E-10 |
| EML3       | -0.121 | -0.018 | 0.017  | -0.267 | -0.465 | 2.52E-10 |
| PKDCC      | -0.28  | -0.217 | -0.582 | -1.144 | -1.083 | 2.52E-10 |
| ACOT9      | 0.146  | 0.144  | 0.246  | 0.203  | 0.384  | 2.56E-10 |
| TARS2      | -0.047 | 0.094  | 0.263  | 0.393  | -0.162 | 2.59E-10 |
| FPGT       | -0.515 | -0.092 | -0.066 | -0.193 | -0.684 | 2.61E-10 |
| HAS3       | -0.287 | 0.111  | -0.12  | -0.508 | -0.916 | 2.66E-10 |
| PHF7       | -0.457 | 0.066  | 0.235  | 0.168  | -0.69  | 2.67E-10 |
| BCLAF1     | 0.432  | 0.136  | -0.018 | 0.18   | -0.074 | 2.69E-10 |
| CCDC59     | 0.022  | 0.017  | -0.223 | -0.373 | -0.571 | 2.70E-10 |
| CHID1      | 0.063  | -0.012 | 0.023  | 0.36   | 0.472  | 2.73E-10 |
| VSIG2      | -0.962 | -0.328 | 0.25   | -0.894 | -0.406 | 2.74E-10 |
| PRICKLE4   | -0.37  | 0.663  | 0.892  | -0.084 | 0.177  | 2.75E-10 |
| TAOK3      | 0.187  | 0.125  | 0.224  | 0.448  | 0.529  | 2.78E-10 |
| EDN1       | -0.164 | -0.061 | -0.113 | -0.213 | -0.541 | 2.81E-10 |
| EIF6       | 0.248  | 0.063  | 0.075  | 0.385  | 0.503  | 2.83E-10 |
| ST13P5     | 0.106  | -0.043 | -0.018 | 0.329  | 0.637  | 2.85E-10 |
| BCR        | 0.42   | -0.155 | -0.085 | 0.212  | 0.166  | 2.88E-10 |
| UBE2SP2    | -0.313 | -0.687 | -0.955 | -0.84  | -0.797 | 2.88E-10 |
| HNRNPLL    | 0.06   | -0.031 | -0.169 | 0.113  | 0.414  | 2.89E-10 |
| RP11-253E3 | 0.247  | -0.366 | 0.073  | -0.283 | -0.083 | 2.90E-10 |
| ATAD2B     | -0.485 | 0.041  | -0.172 | -0.534 | -0.462 | 2.92E-10 |
| STK39      | 0.395  | 0.004  | -0.327 | 0.162  | 0.254  | 2.95E-10 |
| PTPN21     | 0.328  | 0.162  | 0.183  | 0.166  | 0.441  | 2.97E-10 |
| EHMT2      | -0.408 | -0.244 | -0.119 | -0.026 | 0.071  | 2.97E-10 |
| USP20      | -0.393 | 0.119  | 0.224  | 0.007  | 0.066  | 3.02E-10 |
| LY6K       | 0.099  | 0.033  | -0.017 | 0.05   | -0.422 | 3.05E-10 |
| RP11-568K1 | -0.132 | -0.212 | -0.006 | 0.162  | 1.007  | 3.06E-10 |
| PACSIN2    | 0.38   | -0.056 | -0.187 | 0.071  | 0.494  | 3.06E-10 |
| TMEM44     | -0.21  | -0.179 | 0.253  | 0.01   | 0.425  | 3.10E-10 |
| SHISA5     | 0.07   | -0.025 | 0      | 0.339  | 0.423  | 3.11E-10 |
| TRIAP1     | 0.342  | 0.581  | 0.613  | 0.401  | 0.415  | 3.11E-10 |
| HSPA14     | 0.01   | 0.001  | -0.203 | -0.464 | -0.803 | 3.12E-10 |
| MPC1       | -0.304 | -0.165 | -0.158 | -0.494 | -0.837 | 3.12E-10 |
| ARGLU1     | -0.36  | 0.005  | -0.029 | -0.896 | -0.502 | 3.14E-10 |
| PRR22      | -0.154 | 0.385  | -0.087 | -0.782 | -1.034 | 3.14E-10 |

|           |        |        |        |        |        |          |
|-----------|--------|--------|--------|--------|--------|----------|
| RHOBTB3   | 0.367  | -0.021 | -0.222 | -0.051 | 0.106  | 3.15E-10 |
| RIN1      | -0.77  | -0.603 | -0.155 | -0.288 | -0.623 | 3.17E-10 |
| TK2       | 0.01   | -0.179 | 0.089  | 0.21   | 0.357  | 3.23E-10 |
| METTTL23  | -0.628 | -0.223 | 0.079  | 0.043  | -0.106 | 3.23E-10 |
| ME3       | -0.154 | -0.049 | 0.023  | -0.456 | 0.224  | 3.29E-10 |
| WWP1      | 0.417  | 0.076  | -0.062 | 0.056  | 0.36   | 3.37E-10 |
| IGF2BP1   | 0.114  | -0.151 | -0.116 | -0.222 | -0.334 | 3.37E-10 |
| ATF6      | 0.266  | 0.157  | 0.02   | 0.411  | 0.501  | 3.40E-10 |
| ALDH1A2   | 0.207  | 0.017  | 0.153  | 0.51   | 0.614  | 3.44E-10 |
| AP1M1     | 0.194  | 0.002  | 0.082  | 0.483  | 0.423  | 3.54E-10 |
| LPIN3     | -0.545 | 0.145  | 0.357  | -0.312 | -0.046 | 3.54E-10 |
| PPT1      | 0.212  | 0.105  | 0.024  | 0.438  | 0.222  | 3.55E-10 |
| SPHK2     | -0.49  | 0.03   | -0.001 | -0.06  | -0.489 | 3.55E-10 |
| DNMT3A    | -0.166 | 0.131  | 0.212  | -0.019 | 0.354  | 3.57E-10 |
| EDRF1     | 0.003  | 0.053  | -0.002 | -0.406 | -0.404 | 3.57E-10 |
| XIAP      | 0.416  | 0.078  | 0.179  | 0.34   | 0.515  | 3.58E-10 |
| NEDD4     | 0.289  | 0.142  | -0.051 | 0.158  | 0.432  | 3.59E-10 |
| SMC4      | -0.163 | -0.321 | -0.252 | -0.111 | -0.394 | 3.60E-10 |
| IMP3      | -0.33  | -0.248 | -0.074 | 0.181  | 0.175  | 3.61E-10 |
| ARSA      | -0.258 | -0.091 | 0.035  | -0.016 | 0.335  | 3.64E-10 |
| GATAD2A   | 0.4    | -0.136 | -0.129 | 0.1    | 0.226  | 3.64E-10 |
| DNASE2    | 0.204  | 0.069  | 0.028  | 0.504  | 0.506  | 3.66E-10 |
| TMEM127   | 0.216  | 0.193  | 0.034  | 0.248  | 0.543  | 3.70E-10 |
| PPARD     | 0.138  | -0.082 | 0.107  | 0.485  | 0.24   | 3.84E-10 |
| HIPK3     | 0.384  | 0.205  | 0.162  | -0.007 | 0.25   | 3.85E-10 |
| ASTE1     | 0.22   | 0.077  | -0.227 | -0.133 | -0.62  | 3.87E-10 |
| TM4SF18   | -0.487 | -0.257 | -0.091 | -0.092 | 0.218  | 3.92E-10 |
| IFI16     | 0.203  | 0.087  | 0.071  | 0.478  | 0.543  | 3.93E-10 |
| C16orf62  | 0.391  | 0.131  | 0.061  | 0.43   | 0.595  | 3.94E-10 |
| PRDX6     | 0.175  | 0.047  | 0.061  | 0.261  | 0.411  | 3.96E-10 |
| CSNK2A2   | 0.15   | 0.118  | 0.05   | 0.281  | 0.458  | 3.98E-10 |
| RP11-87M1 | 0.22   | 0.099  | 0.077  | 0.326  | 0.384  | 4.00E-10 |
| PEAK1     | 0.065  | 0.094  | 0.301  | -0.07  | 0.433  | 4.01E-10 |
| GNB5      | 0.161  | 0.035  | 0.106  | 0.281  | 0.603  | 4.05E-10 |
| BRI3      | 0.01   | -0.15  | 0.023  | 0.102  | 0.35   | 4.06E-10 |
| CYB561D1  | -0.237 | 0      | -0.004 | -0.352 | -0.448 | 4.11E-10 |
| SH3GLB2   | -0.52  | -0.056 | 0.153  | -0.195 | 0.054  | 4.14E-10 |
| DHFRP1    | 0.105  | 0.147  | -0.016 | 0.067  | -0.338 | 4.14E-10 |

|             |        |        |        |        |        |          |
|-------------|--------|--------|--------|--------|--------|----------|
| STRA13      | -0.434 | -0.272 | -0.197 | -0.483 | -0.716 | 4.23E-10 |
| APBA1       | 0.012  | -0.326 | -0.487 | -0.33  | -0.799 | 4.25E-10 |
| SCAND2      | -0.324 | 0.141  | 0.359  | -0.334 | -0.41  | 4.29E-10 |
| CLNS1A      | 0.222  | 0.099  | 0.05   | 0.301  | 0.337  | 4.30E-10 |
| SIAH1       | 0.487  | 0.093  | -0.075 | 0.081  | 0.384  | 4.33E-10 |
| RP11-274B2  | -0.065 | 0.337  | 0.072  | -0.922 | -0.622 | 4.34E-10 |
| IGF2R       | 0.159  | 0.163  | 0.135  | 0.482  | 0.664  | 4.43E-10 |
| BRD8        | -0.477 | -0.171 | 0.017  | -0.3   | -0.341 | 4.44E-10 |
| TRIP4       | 0.336  | 0.235  | 0.262  | 0.585  | 0.379  | 4.45E-10 |
| EPC2        | 0.56   | 0.27   | 0.208  | 0.219  | 0.293  | 4.48E-10 |
| RP11-958N2  | -0.523 | -0.131 | -0.117 | -0.937 | -0.772 | 4.56E-10 |
| PGBD4       | -0.385 | 0.034  | -0.106 | -0.492 | -0.8   | 4.68E-10 |
| LRRC3       | 0.256  | 0.408  | 0.127  | -0.044 | 0.574  | 4.69E-10 |
| OS9         | 0.202  | 0.123  | 0.061  | 0.403  | 0.594  | 4.71E-10 |
| MRPL24      | 0.141  | -0.11  | -0.173 | -0.013 | -0.361 | 4.72E-10 |
| FKBP9       | 0.279  | 0.095  | -0.01  | 0.342  | 0.542  | 4.78E-10 |
| HGSNAT      | 0.236  | 0.155  | 0.098  | 0.301  | 0.411  | 4.81E-10 |
| FLVCR1      | 0.013  | -0.106 | -0.291 | -0.555 | -0.424 | 4.83E-10 |
| RP11-2B6.2  | -0.593 | 0.089  | -0.232 | -1.057 | -1.014 | 4.84E-10 |
| PIBF1       | -0.013 | 0.053  | 0.13   | 0.456  | 0.489  | 4.87E-10 |
| RP5-1057J7. | -0.353 | -0.016 | 0.154  | -1.043 | -0.816 | 4.88E-10 |
| C3orf70     | 0.455  | 0.033  | -0.209 | -0.344 | -0.638 | 4.92E-10 |
| AC004945.2  | -0.208 | 0.047  | 0.041  | -0.254 | -0.489 | 4.95E-10 |
| LAG3        | -0.311 | -0.354 | -0.307 | -1.081 | -1.342 | 4.96E-10 |
| DGKH        | -0.031 | 0.243  | 0.264  | -0.443 | -0.019 | 5.00E-10 |
| NIPAL2      | -0.204 | -0.208 | 0.042  | -0.126 | 0.535  | 5.09E-10 |
| B3GALNT2    | 0.035  | 0.049  | -0.015 | 0.018  | 0.451  | 5.13E-10 |
| F8A1        | 0.025  | 0.115  | 0.311  | 0.78   | 0.829  | 5.14E-10 |
| ZBTB10      | 0.409  | 0.247  | -0.09  | 0.138  | 0.459  | 5.15E-10 |
| SLC19A2     | 0.37   | 0.075  | -0.024 | -0.181 | -0.163 | 5.16E-10 |
| MORF4L1     | 0.267  | 0.05   | 0.027  | 0.307  | 0.328  | 5.18E-10 |
| SNORD2      | -0.153 | 0.041  | 0.066  | -1.007 | -1.117 | 5.19E-10 |
| HSPB8       | 0.257  | 0.458  | 0.287  | 0.463  | -0.229 | 5.20E-10 |
| ZNF397      | -0.661 | -0.065 | 0.028  | -0.414 | -0.647 | 5.20E-10 |
| ZFYVE28     | -0.308 | -0.234 | 0.53   | 0.419  | -0.378 | 5.36E-10 |
| KIF24       | 0.02   | 0.06   | -0.195 | -0.092 | -0.726 | 5.36E-10 |
| CDC42SE1    | -0.031 | 0.114  | 0.07   | -0.447 | -0.103 | 5.51E-10 |
| CLPB        | 0.161  | 0.182  | 0.144  | 0.467  | -0.2   | 5.51E-10 |



|             |        |        |        |        |        |          |
|-------------|--------|--------|--------|--------|--------|----------|
| FBXL5       | -0.397 | -0.055 | 0.002  | -0.039 | -0.2   | 5.54E-10 |
| WDTA1       | 0.029  | 0.08   | 0.12   | 0.388  | 0.42   | 5.55E-10 |
| RP11-469E1  | 0.365  | -0.127 | -0.224 | -0.08  | 0.239  | 5.55E-10 |
| NFAT5       | -0.343 | 0.081  | 0.215  | -0.435 | 0.09   | 5.61E-10 |
| SNRPA       | 0.246  | -0.109 | -0.288 | 0.026  | -0.365 | 5.63E-10 |
| PPP2R5E     | 0.136  | 0.113  | 0.04   | 0.309  | 0.562  | 5.68E-10 |
| CDKL5       | -0.287 | 0.713  | 0.432  | 0.401  | 0.41   | 5.80E-10 |
| TCEAL4      | 0.146  | 0.08   | 0.033  | 0.249  | 0.353  | 5.82E-10 |
| C1orf216    | -0.105 | -0.144 | -0.212 | -0.259 | -0.395 | 5.83E-10 |
| IFFO1       | -0.881 | -0.398 | -0.155 | -0.634 | -0.274 | 5.84E-10 |
| ERLIN2      | 0.035  | 0.011  | 0.107  | 0.421  | 0.21   | 5.85E-10 |
| STAG1       | 0.166  | -0.175 | -0.253 | 0.066  | -0.36  | 5.85E-10 |
| EMILIN2     | -0.332 | 0.285  | 0.44   | 0.117  | -0.281 | 6.01E-10 |
| PPP5C       | 0.157  | -0.083 | -0.22  | 0.057  | -0.483 | 6.02E-10 |
| KMT2D       | -0.118 | -0.032 | -0.102 | -0.479 | -0.472 | 6.03E-10 |
| UAP1L1      | -0.02  | -0.057 | -0.023 | -0.323 | -0.489 | 6.10E-10 |
| TMEM231     | -0.171 | -0.421 | -0.44  | -0.263 | 0.363  | 6.12E-10 |
| LRR1        | -0.173 | -0.185 | -0.23  | -0.244 | -0.798 | 6.18E-10 |
| CTC-308K20  | -0.569 | 0.533  | 0.84   | 0.135  | 0.003  | 6.29E-10 |
| SEC23A      | 0.468  | 0.135  | -0.057 | 0.303  | 0.464  | 6.36E-10 |
| GALNS       | 0.177  | 0.071  | 0.069  | 0.411  | 0.634  | 6.37E-10 |
| SNX1        | 0.128  | 0.126  | 0.097  | 0.286  | 0.354  | 6.41E-10 |
| PSAT1       | 0.174  | 0.017  | 0.248  | 0.712  | 0.454  | 6.43E-10 |
| CAPN5       | 0.34   | -0.269 | -0.402 | -0.208 | -0.078 | 6.43E-10 |
| ZBTB34      | 0.398  | 0.193  | 0.036  | -0.373 | -0.073 | 6.59E-10 |
| SNORA16A    | -0.23  | 0.083  | 0.119  | -0.66  | -1.172 | 6.59E-10 |
| TBKBP1      | -0.5   | -0.101 | 0.153  | 0.014  | -0.136 | 6.62E-10 |
| OAS1        | -0.157 | -0.386 | 0.231  | 0.482  | 0.979  | 6.66E-10 |
| RP1-34B21.6 | -0.625 | 0.079  | 0.225  | -0.646 | -0.558 | 6.73E-10 |
| PCSK5       | 0.201  | 0.172  | -0.045 | 0.175  | 0.584  | 6.75E-10 |
| MRPL45      | -0.056 | 0.107  | 0.121  | 0.293  | 0.4    | 6.75E-10 |
| RP11-1100L1 | -0.021 | -0.198 | 0.053  | 0.193  | 0.815  | 6.86E-10 |
| EIF3D       | 0.399  | 0.178  | 0.179  | 0.536  | 0.54   | 6.88E-10 |
| TNRC18      | -0.043 | 0.048  | 0.136  | 0.213  | 0.492  | 6.89E-10 |
| ARHGEF19    | 0.099  | 0.039  | -0.094 | -0.41  | -0.596 | 6.95E-10 |
| GOT1        | 0.211  | 0.002  | 0.053  | 0.547  | 0.402  | 6.99E-10 |
| TMEM208     | -0.073 | -0.181 | -0.228 | -0.29  | -0.619 | 7.15E-10 |
| RP11-58E21  | 0.396  | 0.108  | 0.244  | 0.892  | 1.195  | 7.16E-10 |

|             |        |        |        |        |        |          |
|-------------|--------|--------|--------|--------|--------|----------|
| TP53BP1     | -0.071 | 0.09   | 0.212  | 0.278  | 0.373  | 7.25E-10 |
| ZNF841      | -0.212 | 0.067  | 0.114  | -0.688 | -0.464 | 7.38E-10 |
| HYAL2       | 0.055  | -0.203 | -0.391 | -0.026 | -0.316 | 7.46E-10 |
| RP11-66N24  | -0.552 | 0.109  | 0.44   | -0.512 | 0.126  | 7.52E-10 |
| LYSMD1      | -0.098 | 0.235  | 0.041  | -0.389 | -0.716 | 7.55E-10 |
| TRIM39      | 0.25   | 0.392  | 0.316  | -0.078 | -0.094 | 7.60E-10 |
| FRS2        | 0.521  | 0.382  | 0.409  | 0.119  | 0.344  | 7.61E-10 |
| RP5-1099D1  | 0.292  | 0.062  | -0.187 | -0.082 | -0.655 | 7.65E-10 |
| TAF1B       | 0.089  | 0.012  | 0.199  | 0.442  | 0.358  | 7.70E-10 |
| RP11-309I15 | 0.368  | 0.142  | 0.203  | 0.441  | 0.586  | 7.72E-10 |
| SLC8A1      | 0.049  | -0.317 | 0.046  | 0.146  | 0.698  | 7.75E-10 |
| CARM1       | 0.155  | -0.076 | -0.135 | 0.151  | 0.482  | 7.77E-10 |
| TMEM47      | 0.254  | 0.342  | -0.136 | -0.143 | -0.022 | 7.94E-10 |
| EXO2        | -0.185 | 0.002  | -0.112 | -0.375 | -0.459 | 7.95E-10 |
| AC073130.3  | -1.19  | -0.459 | -0.019 | -0.488 | 0.192  | 7.99E-10 |
| SUCLG2      | 0.363  | 0.148  | 0.012  | 0.368  | 0.455  | 8.14E-10 |
| DUSP22      | -0.196 | 0.061  | 0.222  | 0.237  | 0.421  | 8.20E-10 |
| RP11-564D1  | -1.093 | -0.096 | 0.299  | -0.045 | 0.269  | 8.20E-10 |
| RP11-479G2  | 0.419  | 0.147  | 0.024  | 0.443  | 0.73   | 8.25E-10 |
| MRPS34      | 0.134  | -0.061 | -0.066 | 0.262  | 0.378  | 8.38E-10 |
| IARS2       | 0.174  | 0.025  | -0.045 | 0.298  | 0.335  | 8.53E-10 |
| SNORA32     | -0.348 | 0.197  | 0.062  | -0.796 | -1.006 | 8.61E-10 |
| OTUD5       | 0.129  | 0.174  | 0.095  | 0.21   | 0.552  | 8.69E-10 |
| RASGRP3     | 0.081  | -0.12  | -0.218 | -0.657 | 0.012  | 8.73E-10 |
| CACUL1      | 0.044  | 0.104  | 0.084  | 0.102  | 0.459  | 8.80E-10 |
| DDOST       | 0.163  | 0.021  | -0.042 | 0.316  | 0.386  | 8.81E-10 |
| CEP131      | -0.43  | -0.119 | -0.208 | -0.554 | -0.528 | 8.81E-10 |
| DYRK2       | 0.409  | -0.033 | -0.139 | -0.225 | 0.052  | 8.87E-10 |
| ANKRD52     | -0.224 | -0.201 | -0.254 | -0.367 | -0.428 | 8.99E-10 |
| RP1-278C19  | -0.521 | -0.534 | -0.485 | -0.839 | -1.481 | 9.06E-10 |
| MRAS        | 0.29   | -0.103 | -0.245 | -0.061 | 0.761  | 9.07E-10 |
| COPS7A      | 0.173  | 0.02   | -0.005 | 0.168  | -0.407 | 9.10E-10 |
| SMARCAL1    | -0.104 | -0.107 | 0.176  | 0.551  | 0.351  | 9.14E-10 |
| GBA2        | -0.485 | -0.273 | 0.167  | -0.376 | 0.005  | 9.16E-10 |
| MPC2        | -0.154 | -0.067 | -0.163 | -0.37  | -0.598 | 9.16E-10 |
| RP1-102E24  | -0.444 | 0.274  | 0.3    | -0.775 | -0.783 | 9.23E-10 |
| LRCH1       | 0.285  | 0.043  | -0.033 | 0.007  | 0.381  | 9.24E-10 |
| C15orf54    | -0.496 | -0.051 | -0.082 | -0.207 | -0.134 | 9.25E-10 |

|            |        |        |        |        |        |          |
|------------|--------|--------|--------|--------|--------|----------|
| HABP4      | 0.389  | -0.132 | -0.358 | -0.129 | -0.043 | 9.26E-10 |
| RAB3GAP1   | 0.283  | 0.329  | 0.216  | 0.477  | 0.619  | 9.33E-10 |
| TTC13      | -0.425 | -0.016 | 0.09   | -0.212 | -0.286 | 9.33E-10 |
| RPL13      | -0.132 | 0.016  | 0.05   | -0.043 | 0.436  | 9.51E-10 |
| RP11-539G1 | 0.462  | 0.342  | -0.202 | -0.133 | -0.822 | 9.55E-10 |
| HOXB9      | -0.045 | 0.004  | -0.139 | -0.048 | 0.837  | 9.59E-10 |
| TOX4       | 0.37   | 0.267  | 0.225  | 0.5    | 0.532  | 9.62E-10 |
| RP11-159F2 | 0.184  | 0.273  | 0.283  | 0.38   | 0.644  | 9.71E-10 |
| MAPK6      | 0.339  | 0.093  | 0.031  | 0.144  | 0.343  | 9.90E-10 |
| RNF187     | 0.217  | -0.092 | -0.114 | 0.289  | 0.475  | 9.95E-10 |
| PACRGL     | -0.221 | 0.039  | -0.086 | -0.142 | -0.577 | 9.96E-10 |
| RP1-274L14 | 0.381  | -0.176 | -0.361 | 0.137  | 0.014  | 1.01E-09 |
| MED30      | -0.165 | -0.134 | -0.346 | -0.401 | -0.791 | 1.01E-09 |
| RBBP4      | 0.357  | 0.093  | -0.078 | 0.055  | 0.118  | 1.02E-09 |
| STEAP1B    | -0.18  | -0.384 | -0.239 | 0.034  | -0.264 | 1.02E-09 |
| TNFRSF12A  | 0.075  | -0.076 | -0.105 | -0.197 | -0.337 | 1.02E-09 |
| VAMP1      | 0.144  | 0.264  | 0.328  | -0.395 | -0.486 | 1.02E-09 |
| RRP9       | 0.164  | -0.155 | -0.361 | -0.081 | -0.614 | 1.02E-09 |
| CDK5RAP2   | -0.221 | -0.144 | -0.045 | 0.119  | -0.399 | 1.05E-09 |
| CTD-3092A1 | -0.509 | 0.148  | 0.146  | -0.36  | -0.37  | 1.06E-09 |
| RP11-159D1 | -0.077 | -0.061 | 0.266  | -0.849 | -0.467 | 1.06E-09 |
| PRPF39     | -0.176 | 0.112  | -0.023 | -0.767 | -0.401 | 1.08E-09 |
| SASS6      | -0.237 | 0.059  | -0.267 | -0.194 | -0.614 | 1.08E-09 |
| RBPM5      | 0.067  | -0.006 | -0.173 | -0.076 | 0.416  | 1.09E-09 |
| IFNAR2     | 0.22   | -0.043 | 0.013  | 0.023  | 0.405  | 1.09E-09 |
| CDKN2A     | -0.111 | -0.098 | -0.141 | -0.044 | 0.675  | 1.10E-09 |
| PARGP1     | -0.616 | -0.117 | -0.093 | -0.99  | -0.593 | 1.10E-09 |
| TULP4      | 0.057  | 0.082  | -0.064 | -0.042 | 0.479  | 1.11E-09 |
| DUSP18     | -0.183 | 0.238  | 0.168  | 0.261  | 0.45   | 1.11E-09 |
| SLC16A13   | -0.727 | 0.024  | 0.037  | 0.05   | -0.161 | 1.11E-09 |
| FAM195B    | -0.026 | -0.085 | -0.114 | -0.048 | -0.41  | 1.11E-09 |
| FBXL18     | -0.001 | 0.273  | 0.364  | 0.519  | 0.7    | 1.13E-09 |
| WDR24      | -0.191 | 0.327  | 0.174  | 0.021  | -0.432 | 1.13E-09 |
| SH3KBP1    | 0.434  | -0.058 | -0.407 | -0.116 | -0.419 | 1.14E-09 |
| DDI2       | -0.05  | -0.06  | -0.021 | 0.125  | 0.382  | 1.15E-09 |
| PICALM     | 0.562  | 0.212  | -0.012 | 0.188  | 0.245  | 1.15E-09 |
| PCED1A     | -0.421 | 0.138  | 0.208  | -0.379 | -0.294 | 1.16E-09 |
| HES1       | 0.026  | 0.061  | 0.706  | 0.57   | 0.977  | 1.17E-09 |

|             |        |        |        |        |        |          |
|-------------|--------|--------|--------|--------|--------|----------|
| PSPC1       | 0.202  | -0.1   | -0.236 | 0.161  | 0.341  | 1.17E-09 |
| ORC5        | -0.399 | -0.215 | -0.205 | 0.003  | -0.41  | 1.17E-09 |
| ZNF300      | -0.226 | 0.348  | 0.35   | -0.486 | -0.495 | 1.21E-09 |
| GPR143      | 0.514  | 0.263  | 0.439  | 0.551  | 1.469  | 1.23E-09 |
| AMOTL1      | 0.3    | 0.132  | 0.061  | 0.324  | 0.565  | 1.23E-09 |
| PAPOLA      | 0.348  | 0.133  | 0.086  | 0.298  | 0.43   | 1.23E-09 |
| CTC-205M6.  | -0.801 | -0.297 | -0.078 | 0.02   | 0.344  | 1.24E-09 |
| DOPEY1      | -0.512 | -0.015 | -0.222 | -0.369 | -0.516 | 1.24E-09 |
| TBC1D1      | 0.206  | 0.115  | 0.072  | 0.303  | 0.392  | 1.26E-09 |
| ZNF302      | -0.488 | 0.069  | 0.231  | -0.074 | -0.131 | 1.26E-09 |
| ENTHD2      | -0.24  | 0.227  | 0.183  | -0.427 | -0.3   | 1.27E-09 |
| TFAP4       | -0.337 | -0.35  | -0.229 | 0.081  | -0.891 | 1.27E-09 |
| AC133644.2  | 0.208  | 0.561  | 0.16   | 0.597  | 1.762  | 1.28E-09 |
| CCDC127     | -0.376 | -0.18  | -0.015 | 0.062  | -0.048 | 1.28E-09 |
| ANKRD23     | -0.748 | -0.038 | -0.035 | -1.098 | -1.027 | 1.29E-09 |
| RP11-34P13  | -0.317 | -0.004 | -0.061 | -0.418 | -0.638 | 1.30E-09 |
| MSTO1       | -0.129 | -0.175 | -0.087 | -0.186 | -0.674 | 1.31E-09 |
| MGRN1       | 0.237  | 0.488  | 0.27   | 0.229  | 0.545  | 1.33E-09 |
| MRC1        | 0.188  | -0.048 | 0.146  | 0.507  | 0.987  | 1.34E-09 |
| ORAI1       | 0.055  | -0.207 | -0.182 | 0.325  | 0.326  | 1.34E-09 |
| RP11-27M15  | -0.451 | -0.044 | 0.1    | -1.184 | -0.409 | 1.36E-09 |
| CYFIP1      | 0.376  | 0.206  | 0.165  | 0.531  | 0.747  | 1.37E-09 |
| EME2        | -0.695 | 0.041  | 0.129  | -0.708 | -0.665 | 1.37E-09 |
| STK36       | -0.665 | -0.143 | 0.082  | -0.424 | -0.291 | 1.39E-09 |
| SYNGR3      | 0.157  | 0.229  | -0.135 | 0.032  | 1.051  | 1.41E-09 |
| RP4-794H19  | -0.296 | -0.262 | 0.396  | 0.537  | 1.136  | 1.44E-09 |
| COPS6       | 0.111  | -0.036 | -0.04  | 0.292  | 0.33   | 1.45E-09 |
| CA12        | 0.256  | -0.021 | -0.177 | -0.065 | -0.889 | 1.46E-09 |
| CD27-AS1    | -0.554 | -0.149 | 0.256  | -0.121 | -0.279 | 1.49E-09 |
| ZFP62       | -0.423 | 0.152  | 0.066  | -0.226 | -0.3   | 1.49E-09 |
| PIK3CA      | 0.2    | 0.097  | -0.079 | 0.071  | 0.421  | 1.50E-09 |
| RP1-224A6.4 | -0.357 | -0.258 | -0.172 | -0.556 | -0.864 | 1.52E-09 |
| GLMP        | 0.011  | 0.008  | 0.011  | 0.234  | 0.344  | 1.53E-09 |
| TMEM2       | 0.339  | 0.278  | -0.165 | -0.099 | -0.158 | 1.53E-09 |
| C1orf27     | -0.073 | 0.076  | -0.076 | -0.426 | -0.604 | 1.53E-09 |
| SYTL3       | 0.572  | -0.174 | 0.328  | 0.409  | 1.059  | 1.54E-09 |
| PDE4A       | 0.353  | -0.02  | 0.067  | 0.164  | -0.294 | 1.54E-09 |
| FRA10AC1    | -0.011 | 0.192  | 0.303  | 0.408  | 0.021  | 1.55E-09 |

|            |        |        |        |        |        |          |
|------------|--------|--------|--------|--------|--------|----------|
| TRABD      | -0.427 | -0.147 | -0.127 | -0.389 | -0.426 | 1.55E-09 |
| SGK494     | -0.872 | -0.027 | 0.134  | -0.696 | -0.627 | 1.55E-09 |
| C7orf61    | -0.723 | -0.687 | -0.087 | 0.145  | 0.961  | 1.56E-09 |
| TROVE2     | 0.4    | 0.274  | 0.051  | 0.138  | 0.231  | 1.56E-09 |
| C16orf87   | 0.54   | 0.099  | -0.108 | 0.003  | 0.045  | 1.57E-09 |
| TLE3       | 0.383  | -0.045 | -0.063 | -0.023 | -0.249 | 1.57E-09 |
| ZNF266     | -0.316 | 0.206  | 0.169  | -0.505 | -0.375 | 1.59E-09 |
| LONRF1     | 0.125  | 0.305  | -0.115 | -0.622 | -0.308 | 1.60E-09 |
| INPP5E     | -0.278 | -0.081 | -0.11  | -0.629 | -0.317 | 1.60E-09 |
| TTC17      | 0.011  | 0.145  | 0.147  | 0.097  | 0.342  | 1.61E-09 |
| ABTB1      | -0.348 | 0.285  | 0.267  | -0.026 | 0.358  | 1.65E-09 |
| IPO8       | 0.089  | 0.092  | 0.147  | 0.48   | 0.207  | 1.66E-09 |
| NRBP2      | -0.535 | -0.022 | 0.116  | -0.546 | 0.033  | 1.66E-09 |
| RP13-104F2 | 0.268  | 0.372  | 0.245  | -0.612 | -0.311 | 1.67E-09 |
| RNF214     | -0.544 | -0.139 | -0.021 | -0.072 | -0.201 | 1.68E-09 |
| RP11-752G1 | -0.549 | 0.008  | -0.016 | -0.982 | -0.986 | 1.68E-09 |
| HDHD3      | -0.326 | 0.341  | 0.134  | -0.169 | -0.419 | 1.69E-09 |
| ACKR4      | -0.026 | 0.82   | 0.805  | 1.012  | 1.344  | 1.72E-09 |
| SCPEP1     | 0.129  | 0.185  | 0.053  | 0.414  | 0.429  | 1.72E-09 |
| CDV3       | 0.132  | 0.123  | 0.139  | 0.382  | 0.497  | 1.75E-09 |
| SAMD14     | -0.15  | 0.417  | 0.272  | 0.042  | 0.39   | 1.77E-09 |
| LRRC71     | -0.44  | -0.05  | 1.112  | 0.617  | 0.367  | 1.78E-09 |
| FKBP7      | 0.03   | -0.082 | -0.178 | -0.038 | 0.359  | 1.79E-09 |
| TTC1       | 0.198  | 0.103  | 0.171  | 0.434  | 0.238  | 1.83E-09 |
| SMCO4      | 0.149  | -0.181 | -0.386 | -0.478 | -0.589 | 1.85E-09 |
| RP11-1055B | -0.159 | 0.106  | -0.346 | -1.148 | -1.004 | 1.85E-09 |
| CNOT6      | 0.229  | 0.254  | 0.108  | 0.182  | 0.489  | 1.86E-09 |
| PDCL3      | 0.331  | 0.116  | -0.079 | 0.186  | -0.283 | 1.87E-09 |
| SLC25A35   | -0.525 | -0.096 | -0.111 | -0.368 | -0.687 | 1.88E-09 |
| SNORD104   | -0.276 | 0.199  | 0.293  | -0.897 | -0.954 | 1.89E-09 |
| PSMD11     | 0.337  | 0.141  | -0.069 | 0.173  | -0.279 | 1.90E-09 |
| TRMT1      | -0.186 | 0.052  | 0.126  | -0.264 | -0.405 | 1.90E-09 |
| DCP2       | -0.406 | -0.147 | -0.073 | -0.298 | -0.339 | 1.92E-09 |
| DIS3       | 0.503  | 0.286  | 0.096  | 0.265  | 0.378  | 2.00E-09 |
| ZNF767     | -0.311 | 0.066  | 0.334  | -0.664 | -0.274 | 2.01E-09 |
| MED13      | 0.439  | 0.193  | -0.003 | 0.04   | 0.223  | 2.02E-09 |
| THEM4      | 0.019  | -0.269 | -0.21  | -0.438 | -0.378 | 2.02E-09 |
| MARVELD2   | 0.373  | 0.367  | -0.13  | -0.207 | -0.595 | 2.02E-09 |

|              |        |        |        |        |        |          |
|--------------|--------|--------|--------|--------|--------|----------|
| HSD17B14     | -0.327 | -0.015 | -0.086 | 0.285  | 0.538  | 2.04E-09 |
| BCAP31       | 0.183  | 0.002  | -0.028 | 0.365  | 0.422  | 2.04E-09 |
| RP11-686G2   | -0.777 | -1.093 | -1.158 | -0.972 | -0.329 | 2.04E-09 |
| PEX3         | -0.004 | -0.097 | -0.229 | -0.065 | -0.502 | 2.05E-09 |
| OSBPL7       | -0.564 | -0.088 | 0.351  | -0.293 | -0.159 | 2.08E-09 |
| FBXO45       | 0.33   | 0.046  | -0.242 | -0.076 | -0.213 | 2.08E-09 |
| RP11-599J14  | -0.366 | 0.463  | 0.325  | -0.446 | -1.018 | 2.09E-09 |
| SLC5A3       | -0.465 | 0.034  | -0.284 | -0.63  | -0.204 | 2.10E-09 |
| RP11-473M2   | -0.415 | 0.219  | 0.115  | -0.268 | -0.444 | 2.10E-09 |
| RNASEH1      | 0.149  | -0.023 | -0.113 | -0.094 | -0.45  | 2.12E-09 |
| CTD-2619J11  | -0.55  | 0.191  | 0.036  | -0.196 | -0.433 | 2.13E-09 |
| INTS2        | -0.182 | 0.162  | 0.09   | -0.005 | -0.362 | 2.16E-09 |
| PCDHGB5      | 0.348  | 0.07   | -0.081 | 0.085  | 0.704  | 2.18E-09 |
| HLA-C        | 0.199  | 0.135  | 0.015  | 0.401  | 0.435  | 2.18E-09 |
| GCLC         | 0.403  | 0.137  | -0.093 | 0.047  | -0.073 | 2.18E-09 |
| ING5         | -0.065 | -0.003 | -0.039 | -0.271 | -0.471 | 2.18E-09 |
| THUMPD1      | 0.338  | 0.18   | 0.005  | 0.133  | 0.038  | 2.19E-09 |
| ZNF134       | 0.384  | 0.259  | 0.218  | 0.335  | 0.597  | 2.20E-09 |
| RP4-717I23.1 | -0.431 | 0.051  | 0.407  | -0.434 | -0.501 | 2.24E-09 |
| IDUA         | -0.464 | -0.069 | 0.149  | -0.428 | 0.35   | 2.26E-09 |
| RP11-478B9   | -0.5   | -0.985 | -0.775 | -0.275 | -0.772 | 2.27E-09 |
| KIF1BP       | 0.092  | 0.091  | 0.075  | 0.446  | 0.501  | 2.29E-09 |
| COMMD8       | -0.356 | -0.221 | -0.186 | -0.577 | -0.98  | 2.31E-09 |
| RP11-631N1   | -0.012 | -0.026 | 0.556  | -0.457 | -0.324 | 2.33E-09 |
| HES4         | -0.561 | -0.079 | -0.273 | -0.776 | 0.687  | 2.34E-09 |
| GLDC         | -0.097 | -0.051 | 0.207  | 0.535  | 0.73   | 2.35E-09 |
| ANKZF1       | -0.543 | 0.153  | 0.337  | -0.237 | -0.171 | 2.35E-09 |
| MPP5         | 0.463  | 0.168  | 0.106  | 0.416  | 0.366  | 2.36E-09 |
| LANCL2       | 0.478  | 0.053  | -0.164 | 0.164  | -0.042 | 2.36E-09 |
| SRBD1        | 0.19   | 0.023  | 0.166  | 0.516  | -0.224 | 2.37E-09 |
| PHKA2        | -0.33  | -0.022 | -0.063 | -0.437 | -0.523 | 2.38E-09 |
| TNKS2        | 0.105  | 0.163  | 0.076  | 0.154  | 0.391  | 2.40E-09 |
| ATXN7L1      | -0.527 | -0.103 | 0.182  | 0.062  | 0.037  | 2.40E-09 |
| STT3B        | 0.354  | 0.146  | -0.064 | 0.182  | -0.245 | 2.40E-09 |
| GPATCH1      | 0.24   | 0.245  | 0.102  | 0.103  | -0.403 | 2.41E-09 |
| RP11-446H1   | -0.573 | 0.072  | 0.047  | -0.029 | -0.527 | 2.42E-09 |
| SETMAR       | 0.144  | -0.048 | -0.287 | -0.376 | -0.565 | 2.43E-09 |
| CCDC94       | 0.539  | 0.083  | -0.023 | 0.445  | 0.074  | 2.44E-09 |

|             |        |        |        |        |        |          |
|-------------|--------|--------|--------|--------|--------|----------|
| GABPB1-AS   | -0.427 | 0.008  | 0.432  | -0.687 | -0.255 | 2.44E-09 |
| LRRC8A      | 0.409  | -0.104 | -0.049 | 0.167  | 0.178  | 2.46E-09 |
| AMPD2       | -0.439 | -0.202 | -0.091 | -0.352 | -0.363 | 2.47E-09 |
| AC000123.2  | -0.362 | 0.027  | -0.08  | -0.947 | -0.483 | 2.47E-09 |
| TAF6L       | -0.116 | -0.073 | -0.229 | -0.252 | -0.63  | 2.47E-09 |
| DNHD1       | -0.395 | 0.263  | 0.479  | -0.485 | -0.238 | 2.48E-09 |
| KDM4A       | -0.044 | 0.211  | 0.224  | 0.392  | 0.438  | 2.49E-09 |
| EPB41       | 0.212  | 0.101  | 0.336  | 0.444  | 0.515  | 2.50E-09 |
| TMEM50A     | 0.134  | 0.072  | -0.014 | 0.197  | 0.367  | 2.50E-09 |
| SNORD88B    | -0.117 | -0.295 | -0.241 | -1.158 | -1.353 | 2.50E-09 |
| RP11-134N1  | 0.159  | 0.115  | 0.028  | 0.569  | 0.867  | 2.52E-09 |
| UNC119      | -0.445 | -0.145 | -0.091 | -0.631 | -0.147 | 2.53E-09 |
| ANO10       | 0.279  | 0.075  | 0.042  | 0.407  | 0.56   | 2.54E-09 |
| RICTOR      | -0.099 | 0.351  | 0.185  | -0.204 | 0.126  | 2.54E-09 |
| DOCK5       | 0.066  | 0.066  | 0.421  | 0.079  | 0.42   | 2.58E-09 |
| ABC7-42389  | -0.42  | 0.146  | 0.054  | -0.676 | -0.618 | 2.58E-09 |
| RP11-415I12 | 0.078  | -0.014 | 0.079  | 0.191  | 0.446  | 2.59E-09 |
| ZEB1        | -0.403 | -0.249 | 0.169  | -0.122 | 0.308  | 2.59E-09 |
| KIAA0513    | 0.147  | 0.155  | -0.052 | -0.008 | -0.773 | 2.59E-09 |
| BCAS3       | 0.673  | 0.17   | 0.14   | 0.626  | 0.877  | 2.62E-09 |
| TTLL3       | -0.522 | -0.133 | 0.202  | -0.714 | -0.347 | 2.63E-09 |
| RP11-156P1  | -0.221 | -0.079 | 0.117  | 0.228  | 0.688  | 2.64E-09 |
| PHAX        | 0.224  | 0.133  | 0.078  | 0.445  | 0.601  | 2.64E-09 |
| SGSM2       | -0.472 | -0.082 | 0.005  | -0.662 | -0.149 | 2.65E-09 |
| RNF217      | 0.575  | 0.283  | 0.388  | 0.193  | 0.525  | 2.69E-09 |
| MAFK        | 0.529  | 0.218  | 0.37   | 0.052  | 0.45   | 2.72E-09 |
| PAK3        | -0.191 | 0.106  | 0.543  | 0.393  | 1.094  | 2.77E-09 |
| ZC3H12A     | 0.091  | 0.235  | -0.069 | -0.592 | 0.064  | 2.78E-09 |
| ABT1        | 0.003  | -0.102 | -0.209 | -0.084 | -0.389 | 2.80E-09 |
| GNG5P2      | 0.018  | -0.238 | -0.199 | -0.341 | -0.584 | 2.81E-09 |
| RP3-510D11  | -0.085 | 0.625  | 0.763  | 0.562  | 1.068  | 2.82E-09 |
| FBXL20      | 0.265  | 0.06   | 0.027  | -0.138 | 0.48   | 2.83E-09 |
| GGNBP2      | 0.405  | 0.035  | 0.086  | 0.159  | 0.105  | 2.83E-09 |
| SIX4        | 0.142  | 0.023  | -0.257 | -0.095 | 0.582  | 2.85E-09 |
| MEG9        | -0.26  | 0.142  | 0.243  | -0.871 | -0.445 | 2.85E-09 |
| PTX3        | -0.379 | -0.117 | -0.305 | -0.003 | -0.494 | 2.85E-09 |
| GLYR1       | 0.222  | -0.004 | 0.046  | 0.214  | 0.415  | 2.88E-09 |
| SNX18       | 0.346  | 0.076  | 0.027  | 0.453  | 0.361  | 2.88E-09 |

|            |        |        |        |        |        |          |
|------------|--------|--------|--------|--------|--------|----------|
| NUDT5      | 0.076  | -0.004 | 0.074  | 0.144  | 0.334  | 2.88E-09 |
| CPNE2      | 0.138  | -0.026 | -0.011 | 0.308  | 0.454  | 2.89E-09 |
| MLX        | -0.369 | -0.207 | -0.081 | -0.134 | -0.453 | 2.92E-09 |
| TMEM39B    | 0.146  | -0.311 | -0.245 | -0.06  | -0.351 | 2.93E-09 |
| RP11-467J1 | -0.016 | 0.701  | 1.28   | 0.591  | 0.788  | 2.95E-09 |
| ANP32A     | 0.245  | -0.208 | -0.38  | -0.028 | -0.258 | 2.96E-09 |
| NANP       | 0.453  | 0.017  | -0.058 | -0.061 | -0.15  | 2.98E-09 |
| C10orf25   | -0.38  | -0.248 | 0.083  | 0.495  | 0.736  | 2.99E-09 |
| NCAPH      | 0.006  | -0.315 | -0.394 | 0.085  | -0.597 | 2.99E-09 |
| TMEM204    | 0.22   | -0.352 | -0.143 | 0.244  | 0.115  | 3.00E-09 |
| CPD        | 0.256  | 0.218  | 0.06   | 0.39   | 0.63   | 3.03E-09 |
| FUT1       | 0.111  | 0.219  | -0.046 | -0.369 | -0.32  | 3.04E-09 |
| FAM234B    | -0.289 | 0.151  | 0.122  | 0.088  | -0.396 | 3.07E-09 |
| RP11-307P2 | -0.808 | -0.83  | -0.749 | -0.819 | -1.077 | 3.07E-09 |
| ITGB3      | 0.498  | 0.175  | -0.076 | 0.048  | 0.252  | 3.08E-09 |
| BAG5       | 0.345  | 0.089  | 0.022  | 0.171  | 0.301  | 3.09E-09 |
| SGK3       | 0.301  | -0.063 | -0.365 | -0.096 | -0.052 | 3.09E-09 |
| UBALD1     | 0.135  | 0.215  | 0.17   | -0.144 | 0.539  | 3.11E-09 |
| NUS1       | 0.382  | 0.188  | 0.007  | 0.099  | 0.067  | 3.13E-09 |
| SRGAP2     | -0.106 | 0.153  | 0.219  | 0.109  | 0.398  | 3.16E-09 |
| NAXD       | -0.261 | -0.005 | -0.09  | -0.451 | -0.375 | 3.17E-09 |
| CCDC85B    | -0.069 | -0.429 | -0.459 | -0.286 | 0.206  | 3.18E-09 |
| KMT5B      | 0.485  | 0.204  | 0.149  | 0.089  | 0.181  | 3.25E-09 |
| MIER3      | 0.372  | 0.209  | 0.011  | -0.229 | -0.149 | 3.25E-09 |
| ACBD4      | -0.932 | -0.094 | 0.048  | -0.31  | -0.241 | 3.26E-09 |
| ZSCAN22    | 0.268  | 0.196  | 0.129  | -0.167 | -0.474 | 3.26E-09 |
| FBXO44     | -0.415 | 0.116  | 0.257  | -0.042 | 0.28   | 3.27E-09 |
| P3H2       | 0.458  | 0.411  | 0.299  | 0.551  | 0.822  | 3.28E-09 |
| PTCD2      | -0.509 | -0.081 | 0.079  | -0.193 | -0.369 | 3.32E-09 |
| BICD1      | -0.541 | -0.043 | 0.08   | -0.138 | -0.014 | 3.33E-09 |
| FH         | 0.205  | 0.139  | 0.052  | 0.326  | -0.239 | 3.34E-09 |
| GPATCH2    | 0.089  | 0.189  | -0.137 | -0.274 | -0.382 | 3.34E-09 |
| TBCK       | -0.143 | 0.044  | 0.02   | 0.161  | 0.448  | 3.35E-09 |
| ELFN2      | 0.524  | 0.055  | 0.386  | 0.72   | 0.89   | 3.36E-09 |
| NR1D1      | -0.828 | 0.081  | 0.294  | 0.379  | 0.148  | 3.36E-09 |
| TMCO4      | 0.037  | -0.124 | 0.327  | 0.589  | 0.773  | 3.38E-09 |
| RP11-144N1 | 0.065  | -0.506 | -0.469 | -0.055 | -0.963 | 3.39E-09 |
| MPV17L2    | 0.118  | -0.125 | -0.188 | -0.069 | -0.632 | 3.41E-09 |



|            |        |        |        |        |        |          |
|------------|--------|--------|--------|--------|--------|----------|
| SMOX       | 0.574  | 0.203  | -0.036 | 0.055  | 0.391  | 3.44E-09 |
| PDZD8      | 0.341  | 0.066  | -0.159 | -0.032 | 0.076  | 3.44E-09 |
| AGO4       | 0.332  | -0.007 | 0.092  | -0.453 | -0.133 | 3.44E-09 |
| RHBDD1     | 0.204  | 0.23   | 0.293  | 0.508  | -0.129 | 3.46E-09 |
| MTPN       | 0.351  | 0.129  | 0.012  | 0.238  | 0.387  | 3.48E-09 |
| FARS2      | 0.612  | -0.062 | -0.102 | 0.516  | 0.298  | 3.48E-09 |
| ABCC4      | 0.337  | 0.018  | -0.228 | -0.028 | -0.006 | 3.48E-09 |
| REPS1      | 0.318  | -0.086 | -0.244 | 0.169  | 0.348  | 3.50E-09 |
| ADPRH      | 0.406  | 0.283  | 0.384  | 0.66   | 0.975  | 3.52E-09 |
| SELPLG     | -0.263 | -0.388 | 0.409  | 0.007  | 1.041  | 3.53E-09 |
| RUVBL1     | 0.314  | 0.1    | 0.045  | 0.599  | 0.468  | 3.57E-09 |
| SFMBT1     | 0.53   | 0.058  | -0.332 | -0.387 | -0.51  | 3.59E-09 |
| RGS20      | -0.047 | 0.301  | 0.625  | 0.407  | 0.63   | 3.60E-09 |
| RP11-133L1 | 0.392  | -0.173 | -0.236 | -0.028 | -0.335 | 3.62E-09 |
| KCTD1      | 0.049  | 0.106  | 0.066  | 0.373  | 0.678  | 3.63E-09 |
| BLVRB      | 0.05   | 0.028  | 0.078  | 0.475  | -0.004 | 3.63E-09 |
| PSMG3      | -0.145 | -0.035 | -0.141 | -0.405 | -0.537 | 3.63E-09 |
| CXorf40A   | -0.263 | -0.046 | -0.183 | -0.256 | -0.582 | 3.69E-09 |
| RF00019    | -0.567 | -0.019 | 0.066  | -1.036 | -0.756 | 3.72E-09 |
| ATL2       | -0.296 | -0.217 | -0.315 | -0.457 | -0.571 | 3.73E-09 |
| TEAD4      | 0.181  | -0.153 | -0.101 | 0.065  | -0.439 | 3.82E-09 |
| MZT2A      | -0.256 | -0.005 | 0.052  | 0.058  | 0.521  | 3.83E-09 |
| BHLHB9     | 0.037  | -0.148 | 0.018  | 0.531  | 0.476  | 3.86E-09 |
| CEP78      | 0.041  | 0.001  | -0.127 | -0.022 | -0.444 | 3.92E-09 |
| NAA40      | -0.352 | -0.016 | -0.071 | -0.278 | -0.269 | 3.93E-09 |
| THBD       | 0.17   | -0.042 | 0.205  | 0.389  | 0.514  | 4.02E-09 |
| COPB1      | 0.363  | 0.126  | 0.06   | 0.405  | 0.537  | 4.03E-09 |
| EIF2S1     | 0.349  | 0.152  | -0.002 | 0.271  | -0.037 | 4.03E-09 |
| RP11-462L8 | 0.281  | -0.564 | -0.168 | 0.183  | 1.192  | 4.14E-09 |
| FAM107A    | 0.104  | 0.144  | 0.225  | 0.68   | 0.418  | 4.14E-09 |
| ZNF789     | -0.439 | -0.098 | -0.012 | -0.815 | -0.799 | 4.17E-09 |
| C1orf115   | -0.48  | 0.005  | 0.212  | -0.236 | -0.214 | 4.23E-09 |
| VPS16      | -0.054 | 0.12   | 0.003  | -0.068 | -0.351 | 4.23E-09 |
| ZNF26      | 0.021  | 0.085  | -0.103 | -0.518 | -0.387 | 4.26E-09 |
| FTSJ1      | 0.152  | 0.008  | -0.001 | 0.066  | -0.333 | 4.37E-09 |
| TRIO       | 0.087  | 0.032  | 0.132  | 0.019  | 0.389  | 4.38E-09 |
| CCDC66     | -0.433 | 0.005  | 0.084  | -0.355 | -0.376 | 4.39E-09 |
| ZNF691     | -0.432 | 0.145  | 0.037  | -0.344 | -0.528 | 4.44E-09 |

|            |        |        |        |        |        |          |
|------------|--------|--------|--------|--------|--------|----------|
| SYVN1      | -0.282 | -0.168 | 0.113  | -0.126 | -0.326 | 4.45E-09 |
| TSC22D2    | 0.283  | -0.026 | 0.018  | 0.039  | 0.404  | 4.46E-09 |
| RP11-231C1 | -0.413 | -0.165 | -0.054 | -0.779 | -0.547 | 4.46E-09 |
| RP3-331H24 | -0.022 | 0.131  | 0.217  | -0.654 | -0.892 | 4.49E-09 |
| LDHBP      | 0.339  | -0.084 | -0.081 | 0.356  | 0.511  | 4.54E-09 |
| MSANTD2    | -0.206 | -0.094 | -0.036 | -0.673 | -0.541 | 4.57E-09 |
| NIN        | -0.156 | 0.05   | -0.083 | -0.56  | -0.193 | 4.58E-09 |
| RP11-410F1 | 0.451  | 0.086  | 0.095  | 0.566  | 0.882  | 4.63E-09 |
| PRSS3      | 0.014  | -0.118 | -0.217 | -0.43  | -0.019 | 4.63E-09 |
| AC009948.3 | -0.563 | 0.08   | 0.202  | -0.494 | -0.14  | 4.69E-09 |
| CECR5      | 0.107  | -0.179 | -0.253 | -0.01  | -0.445 | 4.69E-09 |
| RAPGEF3    | -0.331 | -0.037 | 0.323  | -0.316 | -0.288 | 4.73E-09 |
| KDM6A      | 0.354  | 0.396  | 0.414  | 0.196  | 0.474  | 4.75E-09 |
| MED31      | -0.029 | 0.11   | -0.013 | -0.531 | -0.929 | 4.77E-09 |
| VEZF1      | 0.019  | 0.154  | 0.209  | 0.243  | 0.435  | 4.82E-09 |
| GK5        | -0.123 | 0.095  | 0.085  | -0.361 | -0.491 | 4.86E-09 |
| RP11-458F8 | -0.18  | 0.6    | 0.93   | 0.156  | 0.006  | 4.89E-09 |
| STON1      | -0.354 | -0.006 | -0.155 | -0.096 | -0.772 | 4.89E-09 |
| RAPGEF5    | 0.097  | 0.054  | 0.221  | 0.265  | 0.422  | 4.92E-09 |
| CPT1C      | -0.625 | -0.281 | -0.041 | -0.307 | -0.22  | 4.94E-09 |
| CCDC167    | -0.133 | -0.144 | -0.027 | -0.227 | -0.616 | 4.95E-09 |
| CTA-215D11 | -1.018 | -0.191 | 0.296  | -0.872 | -0.761 | 4.95E-09 |
| CTNND1     | 0.313  | 0.01   | -0.028 | 0.335  | 0.568  | 4.99E-09 |
| C12orf4    | 0.024  | 0.053  | -0.001 | -0.049 | -0.416 | 5.01E-09 |
| LGR4       | -0.107 | -0.305 | -0.519 | -0.185 | 0.214  | 5.05E-09 |
| BRF2       | 0.356  | 0.148  | -0.058 | -0.125 | -0.361 | 5.05E-09 |
| ATP5D      | 0.019  | -0.042 | 0.038  | 0.231  | 0.428  | 5.07E-09 |
| CHD2       | 0.204  | 0.291  | 0.356  | 0.009  | 0.273  | 5.07E-09 |
| MIR100HG   | -0.354 | -0.346 | -0.211 | -0.778 | -0.627 | 5.13E-09 |
| MRPL16     | 0.073  | -0.022 | 0.019  | 0.344  | -0.057 | 5.14E-09 |
| USP28      | -0.136 | -0.058 | -0.08  | -0.022 | 0.351  | 5.18E-09 |
| PHF20      | 0.008  | 0.129  | 0.247  | 0.361  | 0.471  | 5.20E-09 |
| CSRNP1     | -0.083 | 0.167  | -0.02  | -0.059 | 0.457  | 5.21E-09 |
| RP11-480P3 | 0.258  | 0.175  | 0.213  | 0.532  | 0.775  | 5.24E-09 |
| ZNF354A    | -0.485 | 0.269  | 0.266  | -0.078 | 0.307  | 5.30E-09 |
| P4HTM      | -0.103 | -0.009 | 0.117  | 0.102  | 0.458  | 5.33E-09 |
| ZMAT2      | 0.308  | 0.176  | 0.181  | 0.481  | 0.257  | 5.38E-09 |
| MYO5A      | 0.378  | 0.108  | 0.073  | 0.301  | 0.564  | 5.42E-09 |

|             |        |        |        |        |        |          |
|-------------|--------|--------|--------|--------|--------|----------|
| SNORD14E    | -0.599 | -0.513 | -0.381 | -1.672 | -1.059 | 5.42E-09 |
| RP5-907D15  | -0.137 | -0.303 | 0.049  | -0.055 | 0.659  | 5.45E-09 |
| NACC2       | 0.478  | 0.207  | 0.233  | 0.261  | 0.516  | 5.46E-09 |
| PAR3        | 0.441  | 0.074  | 0.042  | 0.281  | 0.434  | 5.46E-09 |
| TGOLN2      | 0.131  | 0.081  | 0.007  | 0.316  | 0.433  | 5.48E-09 |
| RP4-800G7.1 | -0.874 | -0.216 | 0.147  | -0.556 | -0.402 | 5.49E-09 |
| CUL4B       | 0.16   | 0.166  | 0.193  | 0.494  | 0.352  | 5.50E-09 |
| GTF2H4      | -0.114 | -0.019 | 0.074  | -0.096 | -0.411 | 5.52E-09 |
| MLLT11      | 0.234  | 0.17   | -0.121 | 0.112  | -0.403 | 5.53E-09 |
| GSDMB       | -0.652 | 0.249  | 0.594  | -0.41  | -0.07  | 5.54E-09 |
| PI4K2A      | 0.219  | 0.093  | -0.048 | 0.282  | 0.601  | 5.55E-09 |
| RP11-264B1  | -0.183 | 0.101  | 0.26   | -0.8   | -0.575 | 5.59E-09 |
| SEMA3G      | 0.457  | -0.114 | -0.217 | -0.304 | -0.581 | 5.67E-09 |
| ZNF655      | -0.181 | 0.05   | 0.328  | -0.247 | -0.322 | 5.68E-09 |
| SAMD5       | 0.01   | 0.247  | 0.251  | 0.408  | 0.626  | 5.69E-09 |
| MAP3K14     | -0.144 | -0.171 | -0.249 | -0.702 | -0.357 | 5.73E-09 |
| ANKRD35     | -0.682 | -0.812 | -0.667 | -0.605 | -1.376 | 5.73E-09 |
| MOB3C       | 0.207  | 0.414  | 0.154  | -0.269 | 0.139  | 5.74E-09 |
| RDH11       | 0.045  | -0.115 | -0.366 | -0.228 | -0.16  | 5.74E-09 |
| PLEKHO2     | 0.255  | 0.23   | 0.074  | 0.283  | 0.569  | 5.83E-09 |
| APEX2       | 0.085  | 0.07   | -0.23  | -0.065 | -0.537 | 5.97E-09 |
| FAN1        | -0.211 | 0.136  | 0.125  | -0.18  | -0.376 | 6.02E-09 |
| CENPM       | -0.018 | -0.072 | -0.166 | 0.027  | -0.686 | 6.08E-09 |
| C12orf60    | -0.784 | -0.03  | -0.172 | -0.627 | -1.061 | 6.13E-09 |
| RNASEL      | -0.186 | 0.231  | 0.327  | 0.785  | 0.888  | 6.14E-09 |
| RP3-380B8.1 | 0.289  | -0.123 | -0.099 | 0.561  | 0.773  | 6.17E-09 |
| TNFRSF25    | -0.382 | -0.064 | 0.476  | -0.392 | 0.321  | 6.18E-09 |
| ATG13       | 0.399  | 0.179  | 0.073  | 0.323  | 0.48   | 6.23E-09 |
| RP5-1050D4  | -0.843 | -0.122 | -0.02  | -0.804 | -0.861 | 6.23E-09 |
| PTPN12      | 0.335  | 0.059  | 0.113  | 0.281  | 0.267  | 6.27E-09 |
| PKP4        | -0.245 | -0.303 | -0.328 | -0.37  | -0.385 | 6.35E-09 |
| KIF13B      | 0.394  | 0.104  | 0.031  | 0.12   | 0.389  | 6.37E-09 |
| TUSC1       | 0.505  | 0.226  | -0.172 | 0.493  | 0.521  | 6.44E-09 |
| ZC3HAV1     | 0.452  | 0.48   | 0.473  | 0.807  | 0.82   | 6.47E-09 |
| KIFC2       | -0.536 | 0.148  | 0.291  | -0.625 | -0.333 | 6.47E-09 |
| ZBTB14      | -0.257 | -0.037 | -0.196 | -0.494 | -0.444 | 6.50E-09 |
| C11orf84    | 0.145  | -0.022 | -0.351 | -0.361 | -0.195 | 6.52E-09 |
| CEP112      | 0.279  | 0.053  | -0.003 | 0.171  | 0.623  | 6.53E-09 |

|             |        |        |        |        |        |          |
|-------------|--------|--------|--------|--------|--------|----------|
| RP11-443N2  | 0.41   | 0.074  | 0.018  | -0.085 | -0.38  | 6.53E-09 |
| SLC25A15    | 0.253  | 0.056  | -0.051 | 0.159  | -0.351 | 6.54E-09 |
| IL13RA1     | 0.359  | 0.125  | -0.112 | 0.173  | -0.125 | 6.55E-09 |
| TOMM22      | 0.028  | -0.097 | -0.164 | -0.198 | -0.335 | 6.62E-09 |
| PEX2        | -0.211 | -0.311 | -0.237 | -0.392 | -0.837 | 6.62E-09 |
| VILL        | -0.469 | 0.114  | 0.146  | -0.298 | -0.54  | 6.63E-09 |
| AC004158.2  | -0.527 | -0.09  | -0.11  | -0.879 | -1.159 | 6.64E-09 |
| SNORD14C    | -0.575 | -0.396 | -0.354 | -1.193 | -1.521 | 6.66E-09 |
| ZDHHC1      | -0.127 | -0.12  | 0.063  | -0.062 | 0.679  | 6.75E-09 |
| C1orf112    | -0.278 | 0.061  | -0.012 | -0.008 | -0.498 | 6.75E-09 |
| FARP2       | 0.255  | 0.026  | -0.139 | -0.088 | 0.375  | 6.97E-09 |
| SNORA52     | -0.382 | -0.031 | -0.275 | -1.095 | -1.314 | 7.09E-09 |
| FBXW8       | 0.262  | 0.026  | 0.195  | 0.233  | 0.601  | 7.11E-09 |
| WDR91       | 0.069  | 0.162  | 0.025  | -0.258 | -0.467 | 7.11E-09 |
| GNG5        | -0.051 | -0.094 | -0.143 | -0.355 | -0.429 | 7.12E-09 |
| CCNL2       | -0.454 | 0.205  | 0.195  | -0.716 | -0.548 | 7.20E-09 |
| EAF2        | 0.133  | -0.109 | -0.067 | -0.521 | -1.294 | 7.27E-09 |
| AL450992.2  | 0.039  | 0.383  | 0.719  | 0.975  | 1.39   | 7.36E-09 |
| HOXA11      | 0.214  | -0.22  | 0.059  | 0.469  | -0.076 | 7.41E-09 |
| ABI1        | 0.123  | 0.127  | 0.094  | 0.274  | 0.423  | 7.43E-09 |
| RP11-736I24 | -1.045 | -0.65  | -0.231 | -0.847 | -1.033 | 7.52E-09 |
| DLX1        | 0.252  | -0.597 | -0.752 | -0.78  | -0.656 | 7.58E-09 |
| CAPN1       | 0.285  | 0.104  | 0.101  | 0.519  | 0.709  | 7.59E-09 |
| MRPL55      | -0.164 | -0.07  | -0.137 | -0.114 | -0.531 | 7.68E-09 |
| MMRN2       | 0.161  | -0.048 | -0.103 | 0.369  | 0.487  | 7.71E-09 |
| AASDH       | -0.4   | 0.131  | 0.201  | 0.049  | -0.318 | 7.74E-09 |
| SATB2       | -0.556 | 0.065  | 0.042  | -0.287 | -0.398 | 7.76E-09 |
| AC012667.1  | 0.299  | -0.042 | 0.299  | 0.608  | 1.157  | 7.77E-09 |
| MIGA1       | -0.019 | 0.156  | 0.033  | 0.051  | -0.339 | 7.77E-09 |
| USP7        | 0.36   | 0.099  | -0.056 | 0.049  | -0.006 | 7.79E-09 |
| TIMM17B     | 0.045  | -0.132 | -0.074 | -0.019 | -0.536 | 7.82E-09 |
| AL162151.3  | 0.03   | 0.013  | 0.099  | 0.125  | 0.404  | 7.87E-09 |
| VCPKMT      | -0.128 | 0.004  | -0.076 | -0.588 | -0.823 | 7.95E-09 |
| FAM72B      | -0.919 | -0.531 | -0.441 | -0.726 | -0.984 | 7.95E-09 |
| SRM         | 0.175  | -0.076 | -0.2   | -0.109 | -0.428 | 7.97E-09 |
| CCDC82      | 0.041  | 0.142  | 0.036  | -0.331 | -0.259 | 8.01E-09 |
| AC125238.2  | 0.181  | -0.217 | -0.344 | -0.264 | -0.441 | 8.13E-09 |
| RP11-159D1  | -0.265 | -0.18  | 0.166  | -0.472 | -0.611 | 8.23E-09 |

|            |        |        |        |        |        |          |
|------------|--------|--------|--------|--------|--------|----------|
| NPHP3-ACA  | -0.766 | 0.093  | 0.584  | -0.363 | -0.196 | 8.24E-09 |
| CCDC17     | -0.363 | 0.088  | 0.049  | -0.874 | -1.079 | 8.30E-09 |
| NAP1L1P1   | 0.251  | 0.175  | 0.231  | 0.447  | 0.556  | 8.31E-09 |
| ACAP3      | -0.398 | -0.13  | -0.117 | -0.933 | -0.429 | 8.33E-09 |
| XAF1       | -0.38  | -0.134 | 0.588  | 0.037  | 0.485  | 8.39E-09 |
| TANC2      | 0.07   | 0.034  | -0.434 | -0.323 | -0.002 | 8.40E-09 |
| CDC34      | 0.008  | 0.027  | 0.068  | 0.24   | 0.414  | 8.46E-09 |
| NUCB1      | 0.251  | 0.109  | 0.041  | 0.482  | 0.59   | 8.73E-09 |
| RFX1       | -0.384 | -0.059 | 0.255  | 0.314  | 0.494  | 8.73E-09 |
| NISCH      | -0.444 | -0.109 | -0.032 | -0.527 | -0.08  | 8.79E-09 |
| RP11-284E2 | 0.319  | 0.008  | -0.075 | 0.255  | 0.398  | 8.82E-09 |
| TRPC1      | -0.191 | 0.468  | 0.311  | -0.252 | -0.153 | 8.85E-09 |
| HIC2       | 0.139  | 0.076  | 0.052  | -0.507 | -0.415 | 8.86E-09 |
| MARS2      | -0.527 | -0.266 | -0.505 | -0.439 | -0.844 | 9.03E-09 |
| WARS       | 0.31   | 0.08   | 0.007  | 0.387  | 0.554  | 9.08E-09 |
| MIR3176    | -0.57  | -0.121 | -0.356 | -1.576 | -1.001 | 9.14E-09 |
| CLK1       | 0.041  | 0.204  | 0.227  | -0.537 | -0.394 | 9.16E-09 |
| HUS1       | -0.04  | -0.09  | 0.009  | -0.062 | -0.422 | 9.19E-09 |
| TYSND1     | -0.826 | -0.595 | -0.428 | -0.456 | -0.364 | 9.26E-09 |
| RP11-43N16 | -0.428 | 0.145  | -0.075 | -0.892 | -0.892 | 9.27E-09 |
| POMZP3     | 0.537  | 0.346  | 0.304  | 0.47   | 0.127  | 9.39E-09 |
| MVP        | 0.297  | 0.051  | 0.061  | 0.498  | 0.78   | 9.43E-09 |
| HOXA-AS4   | 0.151  | -0.502 | -0.331 | -0.273 | -0.644 | 9.43E-09 |
| CTSH       | -0.552 | -0.508 | -0.538 | -0.261 | 0.383  | 9.54E-09 |
| FAM213B    | -0.064 | 0.009  | 0.041  | 0.292  | 0.349  | 9.57E-09 |
| DNAAF5     | 0.135  | -0.081 | 0.055  | 0.463  | 0.49   | 9.58E-09 |
| IP6K2      | 0.003  | 0.167  | 0.197  | -0.022 | 0.407  | 9.62E-09 |
| INO80E     | -0.165 | -0.187 | -0.114 | -0.149 | -0.497 | 9.68E-09 |
| TRAPPC12   | 0.188  | -0.124 | 0.061  | 0.333  | 0.344  | 9.79E-09 |
| SDCCAG3    | -0.273 | -0.078 | -0.045 | -0.311 | -0.396 | 9.89E-09 |
| TTPAL      | 0.06   | 0.303  | 0.281  | 0.399  | 0.087  | 9.93E-09 |
| PDK3       | 0.241  | 0.112  | -0.089 | 0.361  | 0.937  | 1.01E-08 |
| AC016747.2 | -0.7   | 0.092  | 0.326  | -0.649 | -0.426 | 1.01E-08 |
| TRIML2     | 0.269  | 0.609  | 0.733  | 0.391  | 0.627  | 1.02E-08 |
| SRP72      | 0.327  | 0.011  | -0.137 | 0.151  | 0.048  | 1.02E-08 |
| MYBL1      | 0.181  | 0.185  | 0.155  | 0.012  | -0.441 | 1.02E-08 |
| DPP4       | 0.4    | -0.011 | -0.063 | 0.295  | 0.749  | 1.03E-08 |
| RCAN3      | 0.713  | 0.039  | 0.217  | 0.517  | 0.421  | 1.04E-08 |

|            |        |        |        |        |        |          |
|------------|--------|--------|--------|--------|--------|----------|
| GNPAT      | 0.058  | 0.063  | 0.132  | 0.24   | 0.418  | 1.04E-08 |
| EYA3       | -0.119 | -0.055 | -0.067 | -0.213 | -0.336 | 1.04E-08 |
| LSM2       | -0.281 | -0.242 | -0.086 | -0.337 | -0.836 | 1.04E-08 |
| GTF2B      | 0.457  | 0.246  | 0.091  | 0.037  | -0.088 | 1.05E-08 |
| TP53BP2    | 0.203  | 0.255  | 0.075  | 0.126  | 0.481  | 1.06E-08 |
| VSIG1      | 0.382  | 0.402  | 0.463  | 0.797  | 0.227  | 1.06E-08 |
| KMT5A      | 0.024  | -0.323 | -0.242 | -0.059 | -0.022 | 1.06E-08 |
| FCN3       | 0.308  | -0.031 | -0.264 | 0.109  | -0.763 | 1.06E-08 |
| KLF2       | -0.044 | 0.29   | 0.546  | 0.452  | 0.382  | 1.08E-08 |
| CHAC1      | -0.212 | -0.102 | 0.53   | 0.6    | 0.44   | 1.10E-08 |
| AHCY       | 0.34   | 0.178  | 0.132  | 0.465  | 0.503  | 1.11E-08 |
| HECTD4     | -0.463 | -0.035 | 0.04   | -0.347 | -0.118 | 1.11E-08 |
| RP11-467L1 | 0.138  | -0.027 | 0.049  | 0.559  | 0.565  | 1.12E-08 |
| CSNK1G3    | 0.256  | 0.233  | 0.115  | 0.195  | 0.41   | 1.13E-08 |
| ERVK3-1    | 0.079  | -0.033 | -0.301 | -0.504 | -0.626 | 1.15E-08 |
| SNORD35B   | -0.694 | -0.323 | -0.164 | -1.209 | -1.237 | 1.15E-08 |
| PRPF38B    | -0.213 | 0.041  | 0.094  | -0.383 | -0.426 | 1.16E-08 |
| MC1R       | -0.144 | 0.193  | 0.287  | -0.495 | -0.697 | 1.16E-08 |
| ICK        | -0.142 | -0.184 | -0.568 | -0.288 | -0.035 | 1.17E-08 |
| MAP3K7CL   | -0.336 | -0.194 | -0.063 | -0.303 | 0.581  | 1.18E-08 |
| FDXACB1    | -0.169 | -0.157 | 0.163  | 0.296  | -0.835 | 1.18E-08 |
| RCBTB2     | 0.438  | 0.127  | 0.097  | 0.002  | 0.438  | 1.19E-08 |
| RBPJ       | 0.265  | 0.257  | 0.169  | 0.385  | 0.499  | 1.20E-08 |
| NICN1      | -0.667 | -0.197 | 0.208  | -0.217 | 0.138  | 1.20E-08 |
| SNORD96A   | -0.295 | 0.055  | 0.09   | -0.748 | -0.956 | 1.20E-08 |
| DECR1      | 0.052  | 0.015  | -0.007 | 0.15   | 0.416  | 1.21E-08 |
| ZNF251     | -0.775 | -0.271 | 0.062  | -0.567 | -0.068 | 1.22E-08 |
| PIK3C2A    | 0.116  | 0.058  | -0.092 | -0.097 | -0.401 | 1.23E-08 |
| NCOA4      | 0.442  | 0.203  | 0.119  | 0.487  | 0.551  | 1.24E-08 |
| SLC1A1     | 0.069  | -0.149 | -0.377 | -0.226 | -0.603 | 1.24E-08 |
| CRYGS      | -0.339 | -0.087 | 0.189  | -1.063 | -0.894 | 1.25E-08 |
| RP11-706O1 | 0.362  | 0.408  | 0.398  | -0.118 | 0.452  | 1.26E-08 |
| TRMT44     | -0.509 | 0.091  | -0.071 | -0.313 | -0.315 | 1.26E-08 |
| SCYL2      | -0.015 | 0.2    | 0.029  | 0.15   | 0.359  | 1.27E-08 |
| PPP2R3B    | -0.566 | -0.004 | 0.176  | -0.074 | -0.172 | 1.27E-08 |
| MAD2L1     | -0.577 | -0.549 | -0.569 | -0.729 | -0.826 | 1.27E-08 |
| RP11-527N2 | -0.167 | -0.017 | 0.245  | 0.47   | 1.488  | 1.28E-08 |
| RP11-793H1 | -0.19  | 0.047  | 0.142  | -0.844 | -0.65  | 1.28E-08 |

|            |        |        |        |        |        |          |
|------------|--------|--------|--------|--------|--------|----------|
| KCTD20     | 0.211  | 0.057  | 0.089  | 0.365  | 0.38   | 1.30E-08 |
| WHAMMP2    | -0.485 | -0.093 | -0.218 | -0.451 | -0.715 | 1.30E-08 |
| CTD-2267D1 | 0.136  | 0.236  | 0.328  | 0.772  | 0.766  | 1.31E-08 |
| STK10      | 0.193  | 0.112  | 0.178  | 0.367  | 0.616  | 1.31E-08 |
| MTMR14     | 0.023  | 0.267  | 0.326  | 0.37   | 0.409  | 1.31E-08 |
| VWA8       | 0.288  | 0.094  | 0.256  | 0.54   | 0.521  | 1.32E-08 |
| B3GNTL1    | -0.135 | -0.17  | 0.349  | 0.288  | 0.5    | 1.32E-08 |
| NUDT9      | 0.126  | 0.046  | 0.124  | 0.382  | 0.391  | 1.32E-08 |
| FBXL19-AS1 | -0.633 | 0.008  | 0.294  | -0.458 | -0.519 | 1.33E-08 |
| SYAP1      | 0.297  | 0.147  | 0.062  | 0.443  | 0.414  | 1.34E-08 |
| KRAS       | 0.491  | 0.163  | -0.029 | 0.204  | 0.261  | 1.34E-08 |
| LSM10      | -0.383 | -0.449 | -0.247 | -0.237 | -0.536 | 1.34E-08 |
| MLF2       | 0.204  | 0.098  | 0.056  | 0.339  | 0.495  | 1.35E-08 |
| PTP4A3     | 0.267  | -0.165 | 0.338  | 0.687  | -0.175 | 1.35E-08 |
| SKA2       | -0.042 | -0.125 | -0.255 | -0.177 | -0.342 | 1.35E-08 |
| NUCB2      | 0.209  | 0.024  | 0.014  | 0.396  | 0.113  | 1.36E-08 |
| METAP1D    | -0.19  | -0.017 | 0.306  | 0.087  | -0.429 | 1.37E-08 |
| HMGA1P3    | 0.13   | -0.176 | 0.066  | 0.426  | 0.665  | 1.39E-08 |
| PGM5P2     | -0.87  | -0.234 | 0.582  | -0.263 | 0.093  | 1.40E-08 |
| RP11-131L2 | 0.493  | 0.764  | 0.278  | 0.173  | -0.449 | 1.40E-08 |
| GSG2       | -0.006 | -0.348 | -0.384 | -0.086 | -0.543 | 1.41E-08 |
| ZNF444     | -0.14  | 0.111  | 0.153  | 0.147  | 0.531  | 1.44E-08 |
| GATB       | 0.257  | 0.228  | 0.242  | 0.602  | 0.503  | 1.46E-08 |
| E2F6       | 0.043  | -0.044 | -0.215 | -0.412 | -0.448 | 1.46E-08 |
| COX17      | -0.202 | -0.093 | -0.012 | -0.541 | -0.789 | 1.47E-08 |
| PODXL2     | -0.088 | 0.031  | -0.353 | -0.132 | 1.029  | 1.49E-08 |
| FZR1       | -0.36  | -0.261 | -0.287 | -0.202 | 0.058  | 1.49E-08 |
| CTC-425O23 | -0.845 | -0.049 | 0.463  | -0.693 | -0.396 | 1.49E-08 |
| ZNRD1      | -0.445 | -0.111 | -0.089 | -0.28  | -0.67  | 1.49E-08 |
| USP22      | 0.182  | -0.054 | -0.11  | 0.146  | 0.431  | 1.50E-08 |
| TMEM136    | -0.447 | -0.03  | 0.01   | -0.638 | -0.349 | 1.50E-08 |
| UBR1       | 0.073  | 0.321  | 0.26   | 0.423  | 0.404  | 1.53E-08 |
| ZNF557     | -0.163 | 0.077  | -0.064 | -0.359 | -0.477 | 1.54E-08 |
| SUSD5      | 0.361  | 0.009  | -0.266 | 0.031  | 0.104  | 1.55E-08 |
| TTC31      | -0.124 | 0.012  | 0.036  | -0.228 | -0.387 | 1.55E-08 |
| RP11-693N9 | -0.546 | 0.41   | 0.286  | -0.615 | 0.27   | 1.56E-08 |
| AP5M1      | 0.013  | 0.132  | 0.108  | 0.146  | 0.342  | 1.57E-08 |
| PJA2       | 0.492  | 0.154  | 0.185  | 0.54   | 0.528  | 1.58E-08 |

|             |        |        |        |        |        |          |
|-------------|--------|--------|--------|--------|--------|----------|
| OLA1        | 0.058  | -0.002 | 0.022  | 0.154  | 0.396  | 1.58E-08 |
| SLC46A1     | -0.548 | -0.171 | 0.017  | 0.04   | 0.213  | 1.58E-08 |
| STRADB      | -0.24  | -0.007 | 0.077  | -0.002 | 0.433  | 1.62E-08 |
| NAB1        | -0.08  | 0.076  | 0.062  | -0.334 | -0.14  | 1.63E-08 |
| TUBB6       | 0.453  | 0.23   | 0.198  | 0.677  | 0.465  | 1.66E-08 |
| DPYD        | 0.445  | 0.04   | 0.053  | 0.447  | 0.539  | 1.67E-08 |
| LTBP4       | -0.036 | 0.181  | 0.455  | 0.213  | 0.326  | 1.67E-08 |
| BUD13       | 0.166  | -0.047 | -0.106 | -0.064 | -0.405 | 1.67E-08 |
| AC004166.7  | -0.534 | 0.114  | 0.007  | -0.286 | -0.503 | 1.67E-08 |
| IKZF4       | 0.069  | -0.085 | 0.015  | -0.397 | -0.668 | 1.68E-08 |
| TBCEL       | 0.247  | 0.343  | 0.26   | 0.247  | 0.475  | 1.71E-08 |
| CEP104      | -0.05  | 0.084  | 0.086  | 0.212  | 0.35   | 1.71E-08 |
| MICALL2     | -0.367 | 0.107  | 0.166  | -0.497 | 0.198  | 1.71E-08 |
| S100A11     | 0.304  | 0.046  | -0.003 | 0.292  | 0.386  | 1.72E-08 |
| RMND1       | -0.122 | -0.139 | -0.009 | 0.222  | 0.391  | 1.75E-08 |
| SUPT20H     | -0.365 | -0.115 | -0.046 | -0.218 | -0.169 | 1.75E-08 |
| SNHG7       | 0.058  | -0.037 | -0.063 | -0.336 | -0.339 | 1.76E-08 |
| MAP2K1      | 0.316  | 0.12   | 0.023  | 0.418  | 0.446  | 1.77E-08 |
| TARBP1      | -0.076 | -0.134 | 0.098  | 0.02   | 0.412  | 1.78E-08 |
| SBF2        | 0.348  | -0.031 | 0.053  | 0.398  | 0.36   | 1.79E-08 |
| TRIM11      | -0.132 | 0.048  | -0.133 | -0.507 | -0.253 | 1.80E-08 |
| PCMTD2      | -0.072 | 0.307  | 0.375  | 0.218  | 0.355  | 1.81E-08 |
| CTTNBP2NL   | 0.17   | 0.167  | 0.07   | 0.228  | 0.551  | 1.83E-08 |
| PGS1        | -0.364 | -0.063 | 0.126  | -0.081 | 0.206  | 1.83E-08 |
| INSIG2      | -0.414 | -0.076 | 0.014  | -0.052 | 0.042  | 1.84E-08 |
| GDPD3       | -0.439 | -0.121 | 0.286  | -0.71  | -0.559 | 1.84E-08 |
| RP11-705B1  | 0.155  | -0.104 | 0.098  | 0.357  | 0.514  | 1.90E-08 |
| PROSER2     | 0.615  | -0.007 | -0.059 | 0.218  | 0.422  | 1.91E-08 |
| ITGA5       | 0.433  | 0.029  | -0.271 | 0.044  | -0.23  | 1.92E-08 |
| ZDHHC6      | -0.141 | 0.082  | 0.078  | -0.258 | -0.391 | 1.92E-08 |
| CCDC125     | 0.052  | 0.014  | 0.541  | 0.705  | 0.886  | 1.95E-08 |
| FBRSL1      | -0.115 | 0.043  | -0.027 | -0.327 | 0.28   | 1.95E-08 |
| CPSF1       | -0.308 | -0.033 | -0.05  | -0.396 | -0.307 | 1.95E-08 |
| TMEM161B    | -0.134 | 0.204  | 0.063  | -0.437 | -0.551 | 1.95E-08 |
| GSTCD       | -0.199 | -0.08  | -0.004 | -0.102 | -0.556 | 1.95E-08 |
| RP5-862P8.2 | 0.79   | 0.651  | 0.315  | 0.001  | -0.004 | 1.96E-08 |
| PRICKLE1    | 0.122  | -0.641 | -0.672 | -0.414 | -0.521 | 1.96E-08 |
| NCRNA0010   | -0.702 | -0.114 | 0.181  | -0.708 | -0.357 | 1.97E-08 |



|            |        |        |        |        |        |          |
|------------|--------|--------|--------|--------|--------|----------|
| UBR4       | -0.084 | 0.129  | 0.046  | -0.385 | -0.149 | 1.99E-08 |
| FUK        | -0.684 | -0.124 | 0.015  | -0.331 | -0.323 | 1.99E-08 |
| MOCS2      | -0.196 | 0.021  | 0.119  | -0.173 | -0.619 | 1.99E-08 |
| CNST       | 0.165  | 0.138  | 0.299  | 0.226  | 0.526  | 2.00E-08 |
| ATP6V1G1   | -0.168 | -0.088 | -0.161 | -0.542 | -0.711 | 2.01E-08 |
| RP11-49111 | -0.056 | 0.184  | 0.714  | 0.887  | 1.443  | 2.02E-08 |
| KIAA2013   | 0.035  | -0.105 | -0.165 | 0.217  | 0.411  | 2.02E-08 |
| CORO7      | -0.39  | -0.167 | 0.045  | -0.12  | 0.45   | 2.03E-08 |
| YWHAB      | 0.304  | 0.082  | -0.005 | 0.312  | 0.371  | 2.04E-08 |
| MYSM1      | -0.358 | 0.134  | 0.26   | -0.456 | -0.145 | 2.04E-08 |
| MTRF1      | -0.564 | 0.044  | 0.048  | -0.347 | -0.654 | 2.04E-08 |
| RP11-16301 | -0.232 | 0.044  | 0.008  | -0.721 | -0.725 | 2.04E-08 |
| SNORD43    | -0.314 | -0.005 | 0.024  | -0.996 | -1.287 | 2.04E-08 |
| RALBP1     | 0.23   | 0.081  | 0.056  | 0.376  | 0.421  | 2.05E-08 |
| ATXN10     | 0.379  | 0.067  | -0.075 | 0.316  | 0.404  | 2.07E-08 |
| TBK1       | 0.378  | 0.261  | 0.164  | 0.257  | 0.3    | 2.08E-08 |
| TUBE1      | -0.564 | -0.229 | -0.008 | -0.348 | -0.703 | 2.09E-08 |
| MDM1       | -0.471 | -0.084 | -0.061 | -0.392 | -0.564 | 2.11E-08 |
| CAMKK1     | 0.057  | -0.344 | 0.209  | -0.332 | -0.539 | 2.13E-08 |
| NBEAL1     | -0.592 | -0.017 | 0.168  | -0.127 | -0.169 | 2.15E-08 |
| FAHD1      | 0.194  | 0.074  | 0.008  | 0.399  | 0.434  | 2.16E-08 |
| TAF1D      | -0.12  | 0.094  | 0.061  | -0.573 | -0.537 | 2.16E-08 |
| MAP3K10    | -0.389 | 0.193  | 0.368  | -0.004 | 0.161  | 2.17E-08 |
| SPATS2L    | 0.463  | -0.057 | -0.204 | 0.11   | 0.116  | 2.17E-08 |
| GPR137B    | 0.278  | 0.366  | 0.236  | 0.348  | 0.805  | 2.18E-08 |
| CTU1       | -0.375 | -0.022 | -0.065 | -0.195 | 0.526  | 2.20E-08 |
| EIF2S2     | 0.234  | 0.103  | 0.027  | 0.341  | 0.195  | 2.21E-08 |
| MTBP       | -0.16  | -0.12  | -0.266 | -0.266 | -0.661 | 2.21E-08 |
| RP11-58B17 | -0.234 | -0.062 | 0.127  | -0.777 | -0.581 | 2.22E-08 |
| HLA-E      | 0.141  | 0.169  | 0.064  | 0.32   | 0.323  | 2.23E-08 |
| FAM219B    | -0.499 | 0.003  | 0.036  | -0.608 | -0.289 | 2.24E-08 |
| DNAJC19    | -0.507 | -0.323 | -0.145 | -0.67  | -0.755 | 2.25E-08 |
| SLC25A43   | 0.209  | 0.12   | 0.186  | 0.344  | 0.587  | 2.26E-08 |
| LMF1       | 0.024  | 0.084  | 0.078  | 0.653  | 0.427  | 2.27E-08 |
| UXS1       | 0.199  | 0.106  | 0.072  | 0.36   | 0.387  | 2.27E-08 |
| ZCCHC2     | -0.306 | 0.121  | 0.028  | -0.204 | -0.374 | 2.27E-08 |
| C9orf69    | 0.055  | 0.192  | 0.179  | 0.33   | 0.467  | 2.30E-08 |
| RP11-21M24 | -0.472 | -0.041 | -0.007 | -0.517 | 0.061  | 2.31E-08 |

|             |        |        |        |        |        |          |
|-------------|--------|--------|--------|--------|--------|----------|
| NBPF9       | -0.4   | 0.013  | 0.224  | -0.333 | -0.091 | 2.31E-08 |
| TBC1D30     | 0.534  | -0.13  | -0.223 | 0.03   | 0.06   | 2.32E-08 |
| IBA57       | 0.474  | 0.214  | 0.08   | 0.022  | 0.068  | 2.33E-08 |
| NT5DC1      | 0.219  | 0.175  | 0.184  | 0.448  | 0.47   | 2.35E-08 |
| RP11-99E15  | -1.804 | -0.994 | -0.885 | -0.987 | -1.356 | 2.35E-08 |
| RAB1A       | 0.375  | 0.208  | 0.127  | 0.397  | 0.399  | 2.36E-08 |
| MIDN        | -0.125 | 0.079  | 0.161  | 0.154  | 0.334  | 2.36E-08 |
| TMED7       | 0.089  | -0.093 | -0.184 | -0.15  | -0.331 | 2.36E-08 |
| YTHDF2      | 0.281  | 0.058  | -0.024 | 0.237  | 0.395  | 2.37E-08 |
| RP11-496N1  | -0.035 | 0.173  | 0.09   | -0.788 | -0.978 | 2.37E-08 |
| C2orf66     | -0.999 | -0.066 | -0.097 | -1.311 | -0.727 | 2.38E-08 |
| DUT         | -0.054 | 0.039  | 0.039  | -0.143 | -0.414 | 2.39E-08 |
| BDH2        | -0.216 | 0.148  | 0.115  | 0.019  | 0.464  | 2.40E-08 |
| PTBP3       | 0.406  | 0.283  | 0.219  | 0.377  | 0.349  | 2.47E-08 |
| AC074117.10 | -0.553 | 0.066  | 0.143  | -0.354 | -0.469 | 2.52E-08 |
| RP11-392P7  | -0.343 | 0.01   | 0.278  | -0.132 | -0.488 | 2.52E-08 |
| NDUFV2P1    | -0.188 | -0.227 | -0.215 | -0.272 | -0.615 | 2.53E-08 |
| DDX60L      | -0.414 | 0.022  | 0.186  | -0.349 | 0.098  | 2.54E-08 |
| KIAA0114    | -0.299 | -0.151 | -0.099 | -0.19  | -0.489 | 2.54E-08 |
| OGT         | -0.368 | 0.08   | 0.179  | -0.492 | 0.116  | 2.55E-08 |
| MIR221      | -0.908 | 0.284  | 0.158  | -0.964 | -0.447 | 2.55E-08 |
| MRPL40      | -0.005 | -0.072 | -0.046 | 0.01   | -0.431 | 2.56E-08 |
| SPRED2      | 0.377  | 0.241  | 0.313  | 0.439  | 0.688  | 2.57E-08 |
| B3GNT9      | 0.437  | -0.13  | -0.243 | 0.017  | 0.299  | 2.59E-08 |
| VPS41       | 0.277  | 0.16   | 0.126  | 0.304  | 0.486  | 2.64E-08 |
| ASGR1       | -0.573 | 0.015  | 0.407  | 0.122  | 0.526  | 2.67E-08 |
| SLC6A6      | 0.405  | 0.254  | 0.278  | 0.391  | 0.441  | 2.68E-08 |
| ZFP64       | 0.086  | 0.025  | 0.245  | 0.432  | 0.576  | 2.71E-08 |
| SCAI        | -0.528 | -0.024 | 0.228  | -0.347 | 0.08   | 2.72E-08 |
| BCAS4       | -0.061 | 0.066  | 0.091  | 0.421  | 1.11   | 2.73E-08 |
| SLC16A5     | 0.434  | 0.248  | 0.356  | -0.014 | -0.126 | 2.73E-08 |
| SCARNA12    | -0.407 | -0.035 | -0.429 | -1.162 | -1.249 | 2.75E-08 |
| STARD9      | 0.076  | 0.228  | 0.497  | -0.247 | 0.132  | 2.76E-08 |
| CYTH2       | 0.126  | 0.297  | 0.223  | -0.445 | 0.068  | 2.76E-08 |
| BID         | 0.165  | 0.01   | -0.031 | 0.095  | 0.366  | 2.77E-08 |
| RP11-440L14 | -0.436 | -0.163 | 0.314  | -0.492 | -0.81  | 2.77E-08 |
| RIPK1       | 0.488  | 0.302  | 0.185  | 0.285  | 0.394  | 2.80E-08 |
| PCLAF       | -0.208 | 0.055  | 0.083  | -0.209 | -0.69  | 2.80E-08 |

|            |        |        |        |        |        |          |
|------------|--------|--------|--------|--------|--------|----------|
| P3H3       | -0.015 | -0.073 | -0.143 | 0.095  | 0.398  | 2.82E-08 |
| FGGY       | 0.364  | -0.03  | -0.063 | 0.491  | 0.783  | 2.84E-08 |
| RP11-569H1 | 0.543  | -0.051 | -0.089 | 0.077  | 0.33   | 2.84E-08 |
| DNAAF2     | -0.588 | -0.481 | -0.241 | -0.104 | 0.055  | 2.93E-08 |
| RP5-961K14 | 0.077  | -0.345 | -0.448 | -0.419 | -0.893 | 2.94E-08 |
| GPR135     | -0.442 | -0.11  | -0.031 | -1.044 | -0.976 | 2.95E-08 |
| RP11-645C2 | -0.578 | -0.16  | 0.213  | -0.738 | -0.414 | 2.96E-08 |
| HPDL       | 0.196  | -0.441 | -0.705 | -0.232 | -1.13  | 2.96E-08 |
| CHTF8      | -0.068 | 0.001  | 0.068  | 0.338  | 0.355  | 3.07E-08 |
| PDSS2      | 0.313  | 0.001  | 0.266  | 0.527  | 0.407  | 3.11E-08 |
| PSMD12     | 0.492  | 0.24   | 0.107  | 0.325  | 0.001  | 3.11E-08 |
| DCUN1D4    | -0.102 | 0.012  | -0.013 | -0.439 | -0.167 | 3.14E-08 |
| USP33      | 0.088  | -0.014 | -0.234 | -0.212 | -0.35  | 3.16E-08 |
| PRPS2      | 0.387  | 0.139  | -0.089 | 0.042  | -0.241 | 3.18E-08 |
| CCZ1       | 0.25   | -0.012 | 0.163  | 0.398  | 0.428  | 3.19E-08 |
| LIN7B      | 0.016  | -0.422 | -0.135 | -0.868 | -1.097 | 3.21E-08 |
| C19orf33   | -0.173 | -0.139 | 0.046  | 0.11   | 0.439  | 3.22E-08 |
| KRT8       | -0.296 | -0.028 | 0.072  | -0.004 | 0.381  | 3.24E-08 |
| SNORA73B   | 0.059  | 0.181  | 0.172  | -0.578 | -1.016 | 3.24E-08 |
| RP11-706O1 | 0.404  | 0.26   | 0.271  | -0.309 | 0.079  | 3.26E-08 |
| CAMK4      | 0.057  | -0.151 | -0.277 | -0.098 | -0.462 | 3.26E-08 |
| MCAT       | -0.096 | 0.049  | 0.058  | 0.401  | 0.48   | 3.37E-08 |
| CPPED1     | 0.347  | 0.028  | -0.117 | 0.285  | 0.349  | 3.38E-08 |
| SH3YL1     | -0.453 | 0.165  | 0.334  | -0.204 | -0.28  | 3.38E-08 |
| INPPL1     | -0.102 | -0.05  | -0.099 | -0.464 | -0.219 | 3.39E-08 |
| SNORA71C   | -1.216 | -0.359 | -0.38  | -1.127 | -1.457 | 3.41E-08 |
| AC022182.2 | 0.41   | 0.047  | -0.254 | -0.013 | -0.395 | 3.42E-08 |
| ZNF600     | 0.044  | 0.552  | 0.552  | 0.161  | 0.003  | 3.45E-08 |
| ARL4A      | 0.142  | -0.067 | -0.168 | -0.384 | -0.381 | 3.45E-08 |
| ZBED4      | 0.386  | 0.063  | -0.146 | 0.027  | 0.364  | 3.46E-08 |
| KDM1A      | 0.209  | -0.002 | -0.113 | 0.245  | 0.375  | 3.47E-08 |
| C2orf44    | -0.281 | 0.037  | -0.086 | -0.07  | -0.345 | 3.55E-08 |
| ARHGAP19   | -0.095 | -0.22  | -0.215 | 0.048  | -0.54  | 3.57E-08 |
| RAPGEFL1   | -0.241 | 0.081  | -0.019 | -0.907 | -0.362 | 3.59E-08 |
| SNORD101   | -0.028 | 0.201  | 0.373  | -0.774 | -0.916 | 3.61E-08 |
| GIMAP1     | -0.386 | 0.005  | 0.016  | 0.381  | 0.064  | 3.64E-08 |
| RP5-1074L1 | -0.799 | -0.501 | -0.217 | -1.174 | -1.149 | 3.66E-08 |
| ITPKC      | 0.021  | 0.407  | 0.123  | 0.056  | 0.091  | 3.72E-08 |

|            |        |        |        |        |        |          |
|------------|--------|--------|--------|--------|--------|----------|
| IFI6       | 0.002  | -0.162 | -0.15  | 0.038  | 0.546  | 3.74E-08 |
| ANO8       | -0.804 | -0.345 | 0.161  | -0.53  | -0.339 | 3.74E-08 |
| UBE2M      | 0.033  | -0.052 | -0.151 | -0.078 | -0.376 | 3.77E-08 |
| ZNF740     | 0.139  | 0.308  | 0.309  | 0.247  | 0.389  | 3.78E-08 |
| POLI       | -0.535 | -0.001 | 0.254  | -0.225 | -0.083 | 3.78E-08 |
| ZNF205     | -0.384 | 0.119  | 0.197  | -0.007 | 0.035  | 3.82E-08 |
| PLEKHH3    | -0.41  | 0.123  | 0.021  | -0.407 | -0.426 | 3.83E-08 |
| C6orf120   | -0.324 | -0.119 | 0.02   | 0.136  | -0.094 | 3.85E-08 |
| AVEN       | 0.314  | 0.026  | 0.046  | 0.291  | 0.475  | 3.93E-08 |
| GPR107     | 0.189  | 0.112  | 0.072  | 0.24   | 0.389  | 3.93E-08 |
| RNF31      | -0.372 | -0.187 | -0.151 | -0.384 | -0.407 | 3.93E-08 |
| NUDT19     | 0.255  | -0.026 | -0.101 | 0.293  | 0.519  | 3.96E-08 |
| RP11-570P1 | -0.012 | -0.394 | -0.438 | -0.147 | -0.51  | 3.97E-08 |
| HIST1H3E   | 0.719  | 0.915  | 1.46   | 1.163  | 0.967  | 3.98E-08 |
| USP9Y      | -0.237 | 0.212  | 0.382  | 0.004  | 0.226  | 3.98E-08 |
| RGS10      | -0.214 | -0.216 | -0.162 | -0.261 | 0.448  | 4.02E-08 |
| IFT57      | 0.232  | 0.053  | 0.064  | 0.189  | 0.549  | 4.03E-08 |
| TSC22D3    | 0.422  | 0.025  | -0.173 | -0.198 | 0.149  | 4.03E-08 |
| DNAJC27    | -0.509 | -0.195 | -0.201 | -0.718 | -0.801 | 4.03E-08 |
| SNORD14B   | -0.194 | 0.181  | 0.147  | -0.72  | -1.163 | 4.04E-08 |
| ATG14      | 0.465  | 0.258  | 0.19   | 0.119  | 0.351  | 4.08E-08 |
| NACAD      | 0.004  | 0.49   | 0.639  | 0.653  | -0.12  | 4.09E-08 |
| GSTP1      | 0.211  | 0.123  | 0.093  | 0.379  | 0.394  | 4.15E-08 |
| SRSF11     | -0.112 | 0.017  | 0.022  | -0.422 | -0.308 | 4.17E-08 |
| PAIP2      | 0.101  | 0.205  | 0.158  | 0.17   | 0.471  | 4.19E-08 |
| IL1R1      | 0.411  | 0.07   | -0.186 | -0.517 | 0.259  | 4.21E-08 |
| NAPB       | -0.317 | 0.098  | 0.064  | -0.622 | -0.628 | 4.26E-08 |
| ANGEL1     | -0.451 | -0.002 | 0.043  | -0.138 | 0.002  | 4.31E-08 |
| VPS51      | 0.128  | 0.096  | 0.059  | 0.311  | 0.458  | 4.38E-08 |
| ST3GAL6    | -0.116 | -0.197 | -0.222 | -0.191 | 0.456  | 4.44E-08 |
| PCGF1      | -0.133 | 0.129  | 0.114  | -0.232 | -0.463 | 4.48E-08 |
| ZNF546     | -1.089 | -0.034 | -0.034 | -0.264 | -0.587 | 4.48E-08 |
| RP11-762H8 | -0.562 | 0.141  | 0.198  | -0.82  | -0.95  | 4.48E-08 |
| PHF14      | 0.236  | 0.413  | 0.291  | 0.569  | 0.422  | 4.49E-08 |
| CLP1       | 0.588  | 0.327  | 0.211  | 0.512  | 0.296  | 4.54E-08 |
| HMBOX1     | -0.313 | 0.119  | 0.116  | -0.494 | -0.371 | 4.55E-08 |
| CCDC137    | -0.008 | -0.012 | -0.251 | -0.379 | -0.284 | 4.57E-08 |
| WDR70      | 0.267  | 0.101  | 0.125  | 0.477  | 0.397  | 4.59E-08 |

|              |        |        |        |        |        |          |
|--------------|--------|--------|--------|--------|--------|----------|
| DGKE         | -0.587 | -0.208 | -0.1   | -0.744 | -0.633 | 4.60E-08 |
| LPCAT4       | -0.173 | -0.377 | 0.05   | 0.069  | -0.226 | 4.61E-08 |
| CDA          | 0.3    | 0.03   | 0.464  | 0.721  | 1.366  | 4.62E-08 |
| WDR4         | -0.199 | -0.093 | -0.173 | -0.311 | -0.5   | 4.62E-08 |
| PAM16        | -0.455 | -0.275 | -0.11  | -0.8   | -0.82  | 4.62E-08 |
| WNK1         | 0.159  | 0.04   | -0.021 | 0.092  | 0.392  | 4.65E-08 |
| C14orf159    | 0.068  | -0.13  | 0.18   | 0.108  | 0.394  | 4.66E-08 |
| AC005154.6   | -0.579 | -0.144 | 0.038  | -0.635 | -0.705 | 4.66E-08 |
| WNT2B        | -0.156 | 0.231  | 0.354  | -0.517 | -0.317 | 4.67E-08 |
| CCNY         | 0.329  | -0.024 | 0.009  | 0.273  | 0.352  | 4.71E-08 |
| SUZ12P       | -0.281 | -0.174 | -0.149 | -0.772 | -0.706 | 4.71E-08 |
| RGS5         | 0.083  | -0.09  | -0.165 | -0.097 | -0.863 | 4.71E-08 |
| BTBD7        | 0.325  | -0.012 | -0.085 | 0.007  | -0.084 | 4.74E-08 |
| MID1         | -0.263 | -0.534 | -0.304 | -0.056 | 0.029  | 4.77E-08 |
| RP11-538112  | -0.409 | -0.352 | -0.006 | 0.731  | 1.041  | 4.83E-08 |
| ECM1         | 0.043  | 0.149  | 0.161  | 0.2    | 0.651  | 4.83E-08 |
| CRTC1        | -0.195 | 0.151  | 0.434  | 0.183  | 0.419  | 4.83E-08 |
| RP11-455B3   | 0.414  | -0.016 | 0.038  | -0.117 | 1.222  | 4.86E-08 |
| NFIL3        | 0.276  | 0.178  | -0.223 | 0.041  | -0.344 | 4.88E-08 |
| MYC          | -0.499 | -0.006 | -0.173 | 0.007  | 0.054  | 4.89E-08 |
| CTIF         | -0.266 | -0.381 | -0.252 | -0.34  | -0.101 | 4.95E-08 |
| HERC2P3      | -1.208 | -0.461 | -0.229 | -1.234 | -1.028 | 4.97E-08 |
| TRAPPC4      | 0.08   | -0.078 | -0.083 | 0.028  | -0.365 | 4.98E-08 |
| KLHL13       | 0.426  | 0.014  | -0.341 | -0.148 | -0.573 | 5.00E-08 |
| ATP7A        | 0.35   | -0.031 | -0.237 | 0.088  | -0.018 | 5.13E-08 |
| SNHG4        | -0.54  | -0.256 | -0.035 | -0.888 | -0.649 | 5.14E-08 |
| RP11-81A1.6  | -0.687 | 0.272  | 0.322  | -0.551 | -0.005 | 5.20E-08 |
| CCDC91       | 0.378  | -0.036 | -0.159 | 0.158  | 0.364  | 5.21E-08 |
| RP11-158L1.1 | -0.094 | -0.033 | -0.018 | -0.836 | -0.704 | 5.26E-08 |
| RP11-296I10  | -0.383 | -0.106 | 0.095  | -0.997 | -0.549 | 5.33E-08 |
| TSHZ1        | 0.212  | -0.366 | -0.269 | 0.154  | 0.306  | 5.34E-08 |
| RP11-864I4.1 | -0.588 | -0.172 | -0.182 | -0.743 | -0.613 | 5.43E-08 |
| RP11-214O1   | 0.217  | -0.07  | 0.11   | 0.348  | 0.39   | 5.45E-08 |
| PLCB1        | 0.071  | 0.102  | 0.001  | 0.348  | 0.485  | 5.47E-08 |
| FLYWCH1      | -0.064 | 0.183  | 0.29   | 0.31   | 0.447  | 5.47E-08 |
| PI4KAP2      | -0.157 | 0.473  | 0.469  | -0.411 | -0.257 | 5.47E-08 |
| ZNF449       | -0.731 | -0.057 | -0.034 | -0.66  | -0.416 | 5.53E-08 |
| RP11-252A2   | -0.37  | 0.048  | 0.261  | -0.619 | -0.551 | 5.62E-08 |

|             |        |        |        |        |        |          |
|-------------|--------|--------|--------|--------|--------|----------|
| ZKSCAN3     | -0.549 | 0.077  | 0.132  | -0.107 | -0.152 | 5.65E-08 |
| OXR1        | 0.016  | 0.063  | -0.219 | -0.168 | -0.39  | 5.65E-08 |
| TRMT10A     | -0.019 | 0.094  | 0.223  | 0.496  | -0.148 | 5.67E-08 |
| KIAA0355    | 0.463  | -0.086 | 0.15   | 0.006  | 0.288  | 5.68E-08 |
| LTBP1       | 0.301  | 0.11   | -0.169 | 0.187  | -0.481 | 5.68E-08 |
| SNORA77B    | -0.501 | -0.391 | -0.391 | -1.165 | -1.529 | 5.68E-08 |
| ETAA1       | -0.268 | 0.079  | 0.235  | -0.116 | -0.366 | 5.71E-08 |
| ZNF514      | -0.785 | 0.051  | 0.132  | -0.498 | -0.391 | 5.71E-08 |
| TPBG        | 0.02   | 0.08   | -0.01  | 0.013  | 0.385  | 5.72E-08 |
| GPX8        | -0.068 | -0.183 | -0.248 | -0.317 | -0.508 | 5.73E-08 |
| DNASE1L2    | -0.604 | -0.155 | 0.141  | -0.717 | -1.187 | 5.73E-08 |
| PKD1        | -0.357 | -0.347 | -0.111 | -0.81  | -0.247 | 5.85E-08 |
| AC006026.10 | -0.371 | -0.063 | -0.111 | -0.758 | -0.883 | 5.85E-08 |
| JAK1        | 0.636  | 0.179  | -0.086 | 0.138  | 0.24   | 5.91E-08 |
| NAT1        | -0.032 | 0.192  | -0.006 | -0.063 | -0.529 | 5.93E-08 |
| AGAP3       | -0.405 | -0.308 | -0.135 | -0.336 | -0.211 | 5.97E-08 |
| ARHGDI      | 0.152  | -0.19  | -0.167 | -0.524 | -1.031 | 5.97E-08 |
| RF00056     | -0.739 | -0.109 | -0.389 | -1.136 | -1.211 | 5.98E-08 |
| DMTF1       | -0.054 | 0.162  | 0.298  | -0.436 | -0.266 | 5.99E-08 |
| SNORD14A    | 0.001  | 0.277  | 0.156  | -0.629 | -1.149 | 6.07E-08 |
| RNF123      | -0.059 | 0.139  | 0.261  | 0.363  | 0.386  | 6.08E-08 |
| DBR1        | 0.472  | 0.003  | -0.07  | 0.216  | 0.259  | 6.13E-08 |
| CRAMP1      | 0.001  | 0.191  | 0.068  | -0.373 | -0.151 | 6.15E-08 |
| CCDC85A     | 0.256  | -0.31  | -0.451 | -0.076 | -0.157 | 6.34E-08 |
| ROGDI       | -0.385 | -0.12  | -0.199 | -0.661 | -0.171 | 6.41E-08 |
| SNORD102    | -0.343 | -0.049 | 0.034  | -0.817 | -1.212 | 6.47E-08 |
| SLC22A31    | -0.119 | -0.109 | -0.213 | -0.612 | -1.353 | 6.47E-08 |
| EP300       | 0.391  | 0.216  | 0.075  | -0.021 | 0.187  | 6.51E-08 |
| ANXA2P3     | 0.323  | -0.157 | -0.26  | 0.38   | 0.588  | 6.56E-08 |
| DIEXF       | 0.558  | 0.098  | 0.255  | 0.324  | 0.221  | 6.63E-08 |
| KCNAB3      | -0.295 | 0.114  | 0.264  | -0.793 | -1.09  | 6.63E-08 |
| H3F3C       | 0.169  | -0.3   | -0.356 | -0.157 | -0.301 | 6.68E-08 |
| PARP2       | 0.036  | 0.045  | -0.153 | -0.054 | -0.344 | 6.77E-08 |
| DYNC1LI1    | 0.475  | 0.16   | -0.097 | 0.233  | -0.03  | 6.80E-08 |
| ZDHHC12     | -0.016 | -0.027 | -0.07  | 0.378  | -0.32  | 6.85E-08 |
| TIMP3       | -0.582 | 0.552  | 0.69   | 0.237  | 0.785  | 6.87E-08 |
| NRBP1       | 0.295  | 0.076  | -0.053 | 0.298  | 0.454  | 6.93E-08 |
| ARRDC3      | -0.285 | 0.028  | -0.328 | -0.274 | -0.311 | 6.93E-08 |

|              |        |        |        |        |        |          |
|--------------|--------|--------|--------|--------|--------|----------|
| RP11-438L7.  | 0.412  | 0.14   | 0.14   | 0.603  | 0.801  | 6.94E-08 |
| THEMIS2      | -0.11  | -0.253 | -0.241 | -0.086 | 0.561  | 7.16E-08 |
| DTYMK        | -0.197 | -0.185 | -0.178 | -0.083 | -0.426 | 7.20E-08 |
| MSANTD3      | 0.13   | -0.007 | 0.069  | 0.143  | 0.37   | 7.22E-08 |
| CLEC2B       | -0.837 | -0.204 | -0.3   | -0.802 | -1.006 | 7.25E-08 |
| AF131215.2   | -0.239 | -0.162 | 0.15   | -0.122 | 0.529  | 7.28E-08 |
| THAP3        | -0.605 | -0.194 | -0.321 | -0.343 | -0.201 | 7.28E-08 |
| SERPINB9     | 0.525  | 0.107  | 0.102  | 0.342  | 0.207  | 7.40E-08 |
| ENTPD7       | 0.468  | 0.062  | -0.055 | 0.123  | 0.141  | 7.48E-08 |
| SPAG4        | -0.089 | -0.011 | 0.01   | -0.373 | -0.698 | 7.51E-08 |
| BCL9         | 0.497  | 0.094  | -0.126 | 0.06   | 0.131  | 7.65E-08 |
| TLE2         | -0.073 | -0.008 | 0.106  | 0.028  | 0.428  | 7.68E-08 |
| DCUN1D2      | -0.136 | -0.183 | -0.16  | -0.677 | -0.514 | 7.72E-08 |
| CTD-2027G2   | -1.026 | -0.996 | -0.512 | -0.933 | -0.78  | 7.72E-08 |
| EMC9         | -0.738 | -0.422 | -0.379 | -0.47  | -0.503 | 7.85E-08 |
| ACTR3B       | 0.058  | 0.312  | 0.215  | 0.159  | -0.381 | 7.90E-08 |
| WFS1         | 0.194  | 0.125  | 0.159  | 0.467  | 0.573  | 7.91E-08 |
| TUBG1        | 0.168  | 0.088  | -0.016 | 0.345  | -0.394 | 7.91E-08 |
| DLAT         | 0.324  | -0.037 | -0.122 | 0.265  | -0.145 | 7.94E-08 |
| UCKL1        | -0.239 | -0.063 | -0.175 | -0.446 | -0.209 | 8.08E-08 |
| STAMBPL1     | 0.302  | -0.116 | 0.469  | 0.547  | -0.599 | 8.10E-08 |
| RP11-513115  | -0.052 | -0.151 | -0.123 | -0.276 | -0.841 | 8.12E-08 |
| UBC          | 0.648  | 0.228  | 0.229  | 0.629  | 0.658  | 8.16E-08 |
| RP11-36817.: | -0.093 | -0.21  | -0.205 | -0.323 | -0.709 | 8.20E-08 |
| CD81         | 0.293  | 0.068  | -0.072 | 0.345  | 0.442  | 8.21E-08 |
| HCN2         | 0.31   | 0.016  | -0.136 | -0.144 | -0.82  | 8.29E-08 |
| PRKCDBP      | -0.102 | -0.371 | -0.461 | -0.154 | 0.211  | 8.38E-08 |
| RPN2         | 0.261  | 0.074  | -0.042 | 0.368  | 0.425  | 8.40E-08 |
| ZNF500       | -0.201 | 0.205  | -0.017 | -0.42  | -0.208 | 8.45E-08 |
| PRKD2        | -0.341 | -0.044 | 0.082  | 0.015  | 0.194  | 8.55E-08 |
| C5orf34      | -0.528 | -0.125 | -0.346 | -0.166 | -0.776 | 8.56E-08 |
| TMC6         | -0.16  | -0.251 | -0.02  | -0.162 | -0.457 | 8.65E-08 |
| MIER2        | 0.242  | -0.065 | -0.019 | -0.018 | -0.34  | 8.74E-08 |
| SNX29        | 0.445  | 0.127  | 0.251  | 0.563  | 0.598  | 8.76E-08 |
| RP11-139E1   | 0.094  | 0.092  | 0.239  | 0.375  | 0.718  | 8.77E-08 |
| SLC39A14     | 0.231  | -0.03  | -0.041 | 0.109  | 0.323  | 8.79E-08 |
| PANK4        | -0.092 | 0.035  | -0.004 | -0.153 | -0.433 | 8.81E-08 |
| NGLY1        | 0.077  | -0.026 | 0.147  | 0.408  | 0.215  | 8.84E-08 |

|             |        |        |        |        |        |          |
|-------------|--------|--------|--------|--------|--------|----------|
| GRAMD1C     | -0.112 | -0.125 | 0.322  | 0.239  | 0.364  | 8.88E-08 |
| ZNF529      | 0.066  | 0.442  | 0.336  | -0.096 | -0.106 | 8.91E-08 |
| ENG         | 0.425  | -0.008 | -0.268 | 0.063  | -0.434 | 8.93E-08 |
| ATP5A1      | 0.297  | 0.079  | -0.001 | 0.419  | 0.346  | 9.01E-08 |
| NAPEPLD     | -0.547 | -0.202 | 0.039  | -0.081 | -0.225 | 9.02E-08 |
| TTC32       | 0.199  | 0.163  | -0.024 | -0.316 | -0.872 | 9.04E-08 |
| RP11-304L1! | -0.644 | -0.422 | -0.202 | -0.914 | -0.905 | 9.11E-08 |
| PARP6       | -0.494 | -0.117 | -0.013 | -0.655 | -0.332 | 9.14E-08 |
| HK1         | 0.341  | -0.032 | 0.031  | 0.537  | 0.545  | 9.16E-08 |
| PRRT3       | 0.22   | -0.348 | 0.119  | 0.377  | 0.674  | 9.20E-08 |
| KAZALD1     | 0.385  | -0.214 | -0.363 | -0.338 | -0.293 | 9.20E-08 |
| ZNF513      | -0.289 | 0.115  | -0.093 | -0.528 | -0.502 | 9.24E-08 |
| PLXNB3      | -0.371 | 0.148  | 0.556  | 0.052  | 0.355  | 9.26E-08 |
| RP4-702J19. | 0.044  | -0.046 | -0.083 | -0.282 | -0.519 | 9.26E-08 |
| RP4-756G23  | 0.267  | 0.502  | 0.667  | 0.642  | 1.404  | 9.39E-08 |
| CIC         | 0.03   | 0.309  | 0.32   | 0.119  | 0.35   | 9.39E-08 |
| RP11-235E1  | -0.317 | -0.008 | 0.427  | -0.282 | 0.45   | 9.49E-08 |
| CCDC144B    | -0.773 | -0.16  | 0.095  | -0.932 | -0.749 | 9.62E-08 |
| TLK2        | 0.439  | 0.116  | 0.005  | 0.096  | 0.293  | 9.71E-08 |
| RP11-336K2  | -1.438 | -0.305 | 0.004  | -0.808 | -0.128 | 9.71E-08 |
| ZNF587      | -0.194 | 0.026  | 0.128  | -0.401 | 0.231  | 9.76E-08 |
| RAC3        | -0.142 | -0.243 | -0.343 | -0.281 | 0.248  | 9.79E-08 |
| AC108488.4  | -0.859 | -0.2   | -0.394 | -0.902 | -0.956 | 9.85E-08 |
| CHRNB1      | -0.225 | 0.088  | 0.015  | 0.289  | 0.497  | 9.94E-08 |
| ZNF485      | -0.889 | -0.105 | 0.22   | -0.247 | -0.586 | 9.98E-08 |
| TMEM160     | -0.209 | 0.043  | -0.061 | 0.062  | 0.775  | 1.00E-07 |
| ZFHX3       | 0      | -0.074 | 0.117  | 0.098  | 0.437  | 1.00E-07 |
| BAZ1A       | 0.283  | 0.365  | 0.04   | 0.125  | 0.423  | 1.00E-07 |
| ABCE1       | 0.286  | 0.032  | -0.019 | 0.343  | 0.17   | 1.00E-07 |
| MIR3916     | -0.421 | -0.003 | 0.04   | -0.997 | -0.506 | 1.01E-07 |
| ST13P3      | 0.279  | 0.66   | 0.33   | 0.886  | 0.957  | 1.02E-07 |
| MPDZ        | 0.149  | 0.025  | 0.22   | 0.205  | 0.439  | 1.02E-07 |
| LARP7       | 0.312  | 0.167  | 0.146  | 0.456  | 0.197  | 1.02E-07 |
| N4BP2       | 0.568  | -0.123 | 0.025  | 0.162  | 0.15   | 1.02E-07 |
| ARL5B       | 0.396  | 0.092  | -0.12  | -0.098 | 0.149  | 1.02E-07 |
| LAMA5       | -0.383 | -0.282 | 0.268  | -0.065 | -0.013 | 1.02E-07 |
| NIFK        | -0.079 | -0.062 | -0.148 | -0.124 | -0.406 | 1.02E-07 |
| JKAMP       | -0.207 | -0.222 | -0.236 | -0.453 | -0.66  | 1.02E-07 |



|             |        |        |        |        |        |          |
|-------------|--------|--------|--------|--------|--------|----------|
| MICE        | -0.78  | -0.112 | -0.169 | -1.001 | -1.211 | 1.02E-07 |
| SCN8A       | -0.528 | -0.332 | 0.074  | -0.257 | -0.054 | 1.03E-07 |
| MTCP1       | -0.242 | 0.333  | 0.149  | -0.691 | -0.466 | 1.03E-07 |
| RP11-249C2  | -0.358 | 0.558  | 1.071  | 0.443  | 1.089  | 1.05E-07 |
| HNRNPCL1    | 0.446  | -0.049 | -0.118 | 0.232  | 0.594  | 1.05E-07 |
| HEXIM1      | 0.642  | 0.144  | -0.148 | 0.122  | 0.094  | 1.05E-07 |
| SMYD3       | 0.33   | 0.055  | -0.286 | 0.232  | 0.422  | 1.07E-07 |
| UBE2J2      | 0.126  | 0.113  | 0.02   | 0.155  | 0.369  | 1.07E-07 |
| OSBPL10     | 0.299  | -0.017 | -0.052 | 0.312  | 0.329  | 1.07E-07 |
| RCE1        | -0.226 | -0.086 | -0.154 | -0.534 | -0.493 | 1.07E-07 |
| NDUFA12     | -0.13  | -0.15  | -0.111 | -0.213 | -0.544 | 1.07E-07 |
| CCDC9       | 0.273  | 0.085  | 0.019  | -0.362 | -0.085 | 1.08E-07 |
| TRDMT1      | -0.061 | -0.232 | -0.104 | -0.331 | -0.815 | 1.08E-07 |
| C15orf39    | 0.1    | 0.133  | 0.193  | 0.311  | 0.555  | 1.11E-07 |
| EIF2B3      | 0.306  | 0.001  | -0.084 | 0.329  | -0.146 | 1.11E-07 |
| RP11-793I11 | -0.093 | -0.293 | -0.245 | -0.405 | -0.648 | 1.11E-07 |
| HOXD4       | -0.828 | -0.11  | -0.046 | -0.702 | -0.668 | 1.12E-07 |
| CEBPZOS     | -0.115 | -0.044 | 0.031  | 0.135  | 0.35   | 1.14E-07 |
| DMPK        | -0.125 | 0.16   | 0.263  | -0.603 | -0.067 | 1.14E-07 |
| RP11-263K1  | -0.324 | 0.046  | -0.275 | -1.286 | -0.958 | 1.15E-07 |
| ZNF445      | -0.098 | 0.045  | 0.015  | -0.403 | -0.26  | 1.16E-07 |
| C19orf25    | -0.079 | 0.044  | 0.009  | -0.25  | -0.345 | 1.16E-07 |
| RP11-345I19 | -0.558 | -0.779 | -0.651 | -0.352 | -0.031 | 1.17E-07 |
| XG          | 0.054  | -0.17  | 0.114  | 0.189  | 1.068  | 1.20E-07 |
| ZNF252P     | -0.361 | 0.025  | 0.35   | 0.189  | 0.233  | 1.20E-07 |
| TAZ         | -0.48  | -0.065 | 0.216  | -0.243 | -0.085 | 1.20E-07 |
| RP11-147L11 | -0.286 | 0.024  | 0.22   | -0.001 | 0.924  | 1.21E-07 |
| TTC28       | 0.394  | 0.126  | 0.341  | 0.4    | 0.374  | 1.21E-07 |
| APPL1       | 0.404  | 0.072  | 0.035  | 0.263  | 0.08   | 1.21E-07 |
| KIAA0195    | -0.281 | -0.08  | -0.134 | -0.307 | -0.34  | 1.21E-07 |
| PPM1K       | -0.874 | -0.334 | -0.356 | -0.524 | -0.487 | 1.21E-07 |
| KLRG1       | -0.165 | -0.796 | -0.764 | -1.175 | -1.477 | 1.21E-07 |
| CEP295      | -0.465 | -0.108 | -0.162 | -0.394 | -0.592 | 1.22E-07 |
| UBE2F       | 0.131  | -0.031 | -0.048 | -0.007 | 0.356  | 1.25E-07 |
| C3orf18     | -0.628 | 0.279  | 0.465  | 0.055  | 0.108  | 1.25E-07 |
| IGF1R       | 0.164  | 0.14   | -0.117 | -0.161 | 0.327  | 1.26E-07 |
| EIF4G2      | 0.335  | 0.099  | -0.056 | 0.118  | 0.216  | 1.27E-07 |
| ADM2        | 0.479  | 0.562  | 0.861  | 0.986  | 1.413  | 1.28E-07 |

|             |        |        |        |        |        |          |
|-------------|--------|--------|--------|--------|--------|----------|
| ZFR         | 0.261  | 0.07   | 0.067  | 0.304  | 0.448  | 1.28E-07 |
| NXT1        | 0.016  | -0.32  | -0.312 | -0.216 | -0.463 | 1.28E-07 |
| SHOC2       | 0.379  | 0.202  | 0.025  | 0.185  | 0.297  | 1.29E-07 |
| SMIM14      | 0.108  | -0.048 | 0.091  | 0.378  | 0.132  | 1.29E-07 |
| TSPAN33     | 0.715  | 0.291  | -0.106 | -0.034 | -0.928 | 1.31E-07 |
| AKAP12      | 0.446  | 0.194  | 0.299  | 0.2    | 0.537  | 1.32E-07 |
| TMBIM1      | 0.34   | 0.138  | 0.119  | 0.348  | 0.386  | 1.33E-07 |
| PYCR1       | -0.155 | -0.225 | -0.064 | 0.038  | -0.509 | 1.33E-07 |
| PGM1        | 0.416  | -0.1   | -0.054 | 0.31   | 0.534  | 1.35E-07 |
| NBPF11      | -0.167 | 0.356  | 0.232  | -0.488 | -0.306 | 1.35E-07 |
| PPP1R12C    | -0.31  | 0.035  | 0.029  | -0.417 | -0.27  | 1.36E-07 |
| L3HYPDH     | -0.451 | -0.052 | 0.101  | -0.457 | -0.66  | 1.36E-07 |
| AC083873.4  | 0.223  | 0.219  | -0.044 | 0.569  | 0.737  | 1.37E-07 |
| ZNF346      | -0.234 | 0.045  | -0.196 | -0.264 | -0.384 | 1.37E-07 |
| GALK1       | -0.112 | -0.092 | -0.115 | 0.174  | 0.371  | 1.38E-07 |
| NCKIPSD     | -0.304 | -0.059 | -0.069 | -0.16  | -0.581 | 1.40E-07 |
| PIK3CB      | 0.139  | -0.011 | 0.111  | 0.387  | 0.397  | 1.41E-07 |
| ERO1A       | 0.145  | 0.293  | 0.11   | 0.303  | 0.335  | 1.41E-07 |
| CCNT1       | 0.004  | 0.101  | -0.172 | -0.345 | -0.273 | 1.41E-07 |
| ERBIN       | 0.353  | 0.379  | 0.176  | 0.174  | 0.094  | 1.42E-07 |
| TMUB2       | -0.345 | -0.011 | 0.055  | -0.131 | -0.192 | 1.42E-07 |
| PSMC3       | 0.4    | 0.226  | 0.099  | 0.539  | -0.01  | 1.43E-07 |
| SNORD14D    | -0.778 | -0.495 | -0.579 | -1.267 | -1.467 | 1.43E-07 |
| FBLN7       | 0.331  | 0.297  | 0.139  | 0.554  | 1.103  | 1.44E-07 |
| AC005519.4  | -0.513 | -0.115 | 0.098  | -0.864 | -0.64  | 1.44E-07 |
| NDUFAF4     | -0.117 | -0.218 | -0.284 | -0.377 | -0.655 | 1.44E-07 |
| PROB1       | 0.193  | -0.112 | -0.289 | -0.381 | 0.318  | 1.45E-07 |
| RBM6        | -0.39  | -0.129 | 0.019  | -0.472 | -0.222 | 1.45E-07 |
| SCARF2      | 0.024  | -0.077 | -0.251 | -0.73  | -0.164 | 1.46E-07 |
| BAG3        | 0.382  | -0.051 | -0.089 | 0.414  | 0.483  | 1.47E-07 |
| ERC1        | 0.214  | 0.119  | 0.084  | 0.221  | 0.453  | 1.48E-07 |
| PKN1        | 0.186  | -0.031 | -0.088 | 0.281  | 0.352  | 1.48E-07 |
| TP53TG1     | -0.054 | 0.133  | 0.547  | 0.383  | 0.655  | 1.49E-07 |
| PLA2G15     | 0.023  | -0.011 | -0.134 | 0.22   | 0.358  | 1.49E-07 |
| TGFA        | 0.673  | 0.254  | -0.504 | -0.12  | 0.318  | 1.49E-07 |
| RP3-323B6.2 | 0.529  | -0.473 | -0.017 | 0.287  | 0.452  | 1.50E-07 |
| RDH10       | 0.023  | 0.062  | -0.25  | -0.413 | -0.375 | 1.51E-07 |
| OPN3        | 0.155  | 0.039  | 0.043  | 0.313  | 0.427  | 1.53E-07 |

|             |        |        |        |        |        |          |
|-------------|--------|--------|--------|--------|--------|----------|
| ZSCAN31     | -0.476 | -0.382 | -0.675 | -0.804 | -0.106 | 1.53E-07 |
| MTRNR2L8    | -0.839 | -0.512 | -0.276 | -1.538 | -0.947 | 1.54E-07 |
| SULT1E1     | -0.53  | -0.295 | -0.105 | -0.29  | -1.54  | 1.54E-07 |
| EZR         | 0.134  | 0.034  | 0.051  | 0.331  | 0.481  | 1.56E-07 |
| SIMC1       | 0.291  | -0.096 | -0.355 | -0.352 | -0.287 | 1.56E-07 |
| RP11-1334A  | -0.203 | -0.566 | 0.552  | -0.231 | 0.087  | 1.57E-07 |
| FANCM       | -0.19  | -0.157 | -0.382 | -0.341 | -0.53  | 1.57E-07 |
| ABRACL      | -0.083 | -0.076 | -0.174 | -0.66  | -0.624 | 1.58E-07 |
| CNOT2       | 0.322  | 0.166  | 0.081  | 0.245  | 0.321  | 1.59E-07 |
| RP11-501M7  | 0.25   | 0.111  | 0.119  | 0.551  | 0.737  | 1.60E-07 |
| SAMM50      | 0.227  | 0.152  | 0.121  | 0.498  | 0.33   | 1.60E-07 |
| FAM168B     | 0.41   | 0.101  | -0.088 | 0.141  | 0.209  | 1.60E-07 |
| RP4-548D19  | -0.302 | 0.109  | -0.064 | -0.986 | -0.934 | 1.60E-07 |
| SLU7        | 0.535  | 0.395  | 0.258  | 0.545  | 0.533  | 1.61E-07 |
| CH507-9B2.9 | 1.071  | 0.21   | 0.685  | 0.332  | 0.249  | 1.61E-07 |
| NDRG4       | 0.087  | -0.157 | -0.554 | -0.546 | -0.22  | 1.61E-07 |
| FAM124B     | 0.058  | -0.067 | 0.102  | 0.299  | 0.491  | 1.63E-07 |
| BHLHE41     | -0.398 | 0.12   | -0.318 | -0.284 | -1.249 | 1.63E-07 |
| PRRX1       | -0.313 | -0.171 | 0.072  | 0.233  | 0.8    | 1.64E-07 |
| SEH1L       | 0.352  | 0.031  | -0.026 | 0.215  | -0.236 | 1.64E-07 |
| THSD7A      | 0.16   | -0.23  | -0.16  | -0.364 | -0.252 | 1.65E-07 |
| BOD1L1      | 0.387  | 0.293  | 0.261  | 0.226  | 0.42   | 1.66E-07 |
| KMT5C       | -0.36  | 0.213  | 0.012  | -0.601 | -0.371 | 1.66E-07 |
| MBLAC2      | -0.448 | -0.26  | -0.339 | -0.216 | -0.647 | 1.67E-07 |
| MIR647      | -0.852 | -0.166 | -0.242 | -1.225 | -0.962 | 1.69E-07 |
| UBN2        | 0.001  | 0.359  | 0.311  | -0.311 | 0.061  | 1.71E-07 |
| NARFL       | -0.34  | 0.009  | -0.067 | -0.072 | -0.406 | 1.71E-07 |
| LL21NC02-2  | 0.129  | 0.434  | 0.318  | 0.59   | 1.303  | 1.72E-07 |
| SNHG9       | -0.25  | -0.213 | -0.051 | -0.426 | -0.975 | 1.73E-07 |
| AC011526.1  | -0.076 | 0.03   | 0.153  | -0.15  | 0.534  | 1.74E-07 |
| ZBTB5       | 0.348  | 0.276  | 0.036  | -0.034 | -0.054 | 1.74E-07 |
| RERE        | 0.179  | -0.093 | 0.037  | 0.117  | 0.326  | 1.76E-07 |
| TUBA4A      | 0.167  | 0.092  | 0.03   | 0.528  | -0.269 | 1.76E-07 |
| NDUFAF7     | -0.434 | 0.115  | 0.195  | -0.18  | -0.323 | 1.76E-07 |
| MYO6        | 0.432  | 0.398  | 0.344  | 0.523  | 0.671  | 1.77E-07 |
| NCSTN       | 0.258  | 0.128  | 0.009  | 0.351  | 0.487  | 1.77E-07 |
| CAMLG       | -0.081 | 0.056  | 0.124  | 0.107  | 0.405  | 1.78E-07 |
| ITGB3BP     | -0.452 | 0.035  | 0.159  | -0.427 | -0.822 | 1.78E-07 |

|             |        |        |        |        |        |          |
|-------------|--------|--------|--------|--------|--------|----------|
| ZFAND3      | 0.396  | 0.223  | 0.096  | 0.419  | 0.605  | 1.79E-07 |
| FOXO3       | 0.343  | 0.14   | 0.093  | 0.371  | 0.533  | 1.79E-07 |
| CACNB1      | -0.268 | -0.142 | -0.09  | -0.792 | -0.645 | 1.79E-07 |
| RP11-466P2  | -0.367 | -0.064 | -0.052 | -0.093 | -1.082 | 1.79E-07 |
| RP4-553F4.6 | 0.409  | 0.427  | 0.461  | 0.637  | 1.628  | 1.80E-07 |
| CUEDC1      | -0.13  | 0      | 0.196  | 0.005  | 0.391  | 1.80E-07 |
| ADRM1       | 0.296  | 0.025  | -0.144 | 0.131  | -0.373 | 1.81E-07 |
| CARD16      | -0.17  | 0.104  | 0.343  | 0.184  | 0.496  | 1.83E-07 |
| LA16c-60H5. | 0.273  | -0.036 | -0.194 | -0.321 | -1.26  | 1.83E-07 |
| BRE         | 0.363  | 0.069  | -0.021 | 0.478  | 0.461  | 1.87E-07 |
| METTL8      | -0.048 | 0.068  | 0.343  | 0.304  | 0.37   | 1.87E-07 |
| ARF6        | 0.311  | 0.102  | 0.148  | 0.444  | 0.304  | 1.87E-07 |
| AC008070.1  | 0.486  | -0.008 | -0.05  | -0.697 | -0.934 | 1.89E-07 |
| IFITM3      | 0.189  | 0.014  | 0.032  | 0.445  | 0.447  | 1.92E-07 |
| AC100748.2  | -0.578 | -0.232 | -0.086 | -0.193 | -0.878 | 1.92E-07 |
| YWHAZ       | 0.4    | 0.102  | -0.035 | 0.271  | 0.28   | 1.93E-07 |
| CTD-2574D2  | -0.552 | 0.024  | 0.211  | -0.835 | -0.573 | 1.94E-07 |
| CTSA        | 0.133  | 0.04   | -0.044 | 0.261  | 0.481  | 1.98E-07 |
| ZFAT        | 0.332  | 0.209  | 0.254  | 0.766  | 0.46   | 1.98E-07 |
| XXbac-BPG2  | -0.973 | -0.05  | -0.016 | -0.536 | -0.759 | 1.98E-07 |
| LEMD2       | -0.241 | -0.041 | 0.012  | -0.302 | -0.39  | 1.99E-07 |
| LZTR1       | -0.375 | 0.064  | 0.149  | -0.286 | -0.182 | 2.04E-07 |
| NFATC4      | -0.479 | -0.088 | 0.063  | -0.558 | -0.063 | 2.05E-07 |
| ARF4        | 0.362  | 0.082  | -0.058 | 0.122  | 0.077  | 2.06E-07 |
| FNBP1L      | 0.11   | 0.143  | 0.054  | 0.131  | 0.464  | 2.07E-07 |
| TTC21B      | 0.031  | 0.088  | -0.165 | -0.288 | -0.346 | 2.07E-07 |
| RP11-211G2  | -0.316 | -0.064 | 0.922  | 0.192  | 1.119  | 2.08E-07 |
| TLR6        | 0.014  | 0.028  | 0.067  | 0.272  | 1.045  | 2.09E-07 |
| AC084018.1  | -0.24  | -0.066 | 0.095  | -0.782 | -0.54  | 2.11E-07 |
| TAGLN2      | 0.331  | 0.064  | -0.003 | 0.426  | 0.44   | 2.12E-07 |
| DST         | -0.192 | -0.092 | 0.252  | -0.185 | 0.404  | 2.13E-07 |
| ZNF550      | -0.262 | 0.22   | 0.124  | -0.56  | -0.37  | 2.13E-07 |
| SEMA3B      | 0.325  | 0.699  | 1.031  | 0.161  | -0.174 | 2.16E-07 |
| SLC46A3     | 0.188  | 0.162  | 0.094  | 0.454  | 1.08   | 2.18E-07 |
| DDX18       | 0.33   | 0.138  | 0.053  | 0.33   | -0.016 | 2.18E-07 |
| PDCD4       | 0.452  | 0.116  | 0.066  | 0.443  | 0.556  | 2.19E-07 |
| ADARB1      | 0.152  | 0.295  | 0.363  | 0.194  | 0.308  | 2.19E-07 |
| PRR14       | -0.214 | 0.022  | -0.029 | -0.308 | -0.395 | 2.19E-07 |

|             |        |        |        |        |        |          |
|-------------|--------|--------|--------|--------|--------|----------|
| ZNF484      | 0.241  | 0.224  | 0.01   | -0.221 | -0.398 | 2.19E-07 |
| TCF7        | 0.332  | 0.071  | -0.457 | -0.45  | -0.69  | 2.21E-07 |
| ALG10B      | -0.319 | 0.103  | -0.079 | -0.339 | -0.56  | 2.23E-07 |
| MVK         | 0.05   | -0.357 | -0.591 | -0.396 | -0.03  | 2.25E-07 |
| GPC2        | -0.782 | -0.165 | -0.299 | -0.896 | -0.1   | 2.25E-07 |
| TRIOBP      | 0.165  | 0.059  | 0.174  | 0.369  | 0.137  | 2.26E-07 |
| RP11-320M2  | -0.918 | 0.121  | -0.058 | -0.516 | -1.066 | 2.26E-07 |
| MSL3        | -0.095 | -0.033 | 0.081  | -0.015 | 0.335  | 2.28E-07 |
| C17orf49    | 0.175  | 0.07   | 0.041  | 0.083  | -0.833 | 2.29E-07 |
| RP11-572O1  | -0.629 | -0.601 | -0.731 | -1.627 | -0.963 | 2.30E-07 |
| LIG1        | 0.266  | 0.424  | 0.349  | 0.389  | 0.012  | 2.31E-07 |
| KIF26A      | 0.045  | -0.193 | -0.017 | -0.432 | -0.539 | 2.35E-07 |
| TRIM7       | -0.251 | -0.191 | 0.068  | 0.167  | 0.385  | 2.36E-07 |
| RP11-228M1  | -0.591 | -0.164 | -0.166 | -0.782 | -0.934 | 2.36E-07 |
| NANS        | 0.347  | 0.065  | -0.074 | 0.319  | 0.405  | 2.37E-07 |
| SNORA25     | -0.236 | -0.045 | 0.091  | -0.827 | -0.925 | 2.37E-07 |
| CCDC6       | 0.112  | 0.087  | 0.115  | 0.418  | 0.425  | 2.39E-07 |
| FADD        | -0.071 | -0.073 | 0.043  | 0.387  | 0.227  | 2.40E-07 |
| SNORA62     | -0.205 | 0.336  | 0.242  | -0.725 | -0.896 | 2.42E-07 |
| C9orf172    | -0.358 | 0.279  | 0.547  | -0.204 | 0.012  | 2.43E-07 |
| CCT4        | 0.286  | 0.017  | -0.036 | 0.324  | 0.218  | 2.44E-07 |
| STEAP3      | 0.334  | -0.127 | -0.138 | 0.079  | 0.261  | 2.46E-07 |
| HHIP        | 0.232  | 0.134  | -0.147 | 0.128  | -0.422 | 2.46E-07 |
| LRRC37BP1   | 0.314  | 0.118  | 0.167  | 0.049  | 0.451  | 2.47E-07 |
| TRIM4       | -0.126 | 0.156  | 0.03   | 0.205  | 0.419  | 2.47E-07 |
| BRCC3       | 0.228  | 0.046  | 0.12   | 0.38   | 0.379  | 2.47E-07 |
| SNORD45A    | -0.321 | 0.147  | 0.075  | -0.914 | -0.939 | 2.48E-07 |
| SH3GL1      | 0.371  | -0.043 | -0.006 | 0.308  | 0.409  | 2.49E-07 |
| HOXA5       | -0.108 | -0.292 | -0.063 | -0.071 | 0.439  | 2.50E-07 |
| RP11-436J2( | 0.413  | 0.19   | 0.077  | 0.415  | 0.006  | 2.51E-07 |
| FAM216A     | -0.233 | -0.294 | -0.104 | -0.161 | -0.572 | 2.52E-07 |
| REEP2       | -0.022 | 0.25   | 0.261  | 0.415  | 1.14   | 2.54E-07 |
| RP11-142G7  | -0.088 | -0.027 | 0.134  | 0.21   | 0.467  | 2.54E-07 |
| TSPYL1      | 0.245  | 0.111  | 0.021  | 0.48   | 0.607  | 2.55E-07 |
| WASHC2C     | 0.161  | 0.208  | 0.026  | 0.368  | 0.438  | 2.56E-07 |
| TTC33       | -0.13  | 0.167  | 0.07   | -0.149 | -0.387 | 2.61E-07 |
| NPIPB11     | -0.322 | -0.104 | 0.046  | -0.962 | -0.669 | 2.61E-07 |
| SNORA70     | -0.203 | -0.078 | 0.07   | -0.811 | -0.903 | 2.61E-07 |

|             |        |        |        |        |        |          |
|-------------|--------|--------|--------|--------|--------|----------|
| ARSK        | 0.096  | 0.02   | -0.201 | -0.114 | -0.363 | 2.63E-07 |
| LCA5        | 0.668  | 0.629  | 0.374  | 0.436  | 0.527  | 2.64E-07 |
| CMTM4       | 0.445  | 0.336  | 0.27   | -0.129 | 0.129  | 2.64E-07 |
| RP11-288G3  | 0.234  | -0.501 | -0.365 | 0.137  | 0.301  | 2.66E-07 |
| RIOK1       | 0.09   | 0.044  | -0.118 | -0.032 | -0.388 | 2.66E-07 |
| OXLD1       | -0.573 | -0.023 | -0.086 | -0.377 | -0.464 | 2.66E-07 |
| RP11-359J14 | -1.026 | -0.229 | -0.049 | -0.945 | -1.082 | 2.66E-07 |
| TTC7B       | 0.244  | -0.028 | -0.101 | 0.188  | 0.379  | 2.67E-07 |
| PLAGL2      | 0.383  | 0.13   | -0.045 | -0.053 | 0.126  | 2.67E-07 |
| DYM         | 0.364  | 0.031  | 0.074  | 0.349  | 0.387  | 2.68E-07 |
| CKAP5       | -0.191 | -0.391 | -0.321 | 0.069  | 0.229  | 2.69E-07 |
| VPS13A      | -0.3   | 0.197  | 0.325  | -0.167 | 0.002  | 2.72E-07 |
| POMP        | -0.096 | -0.092 | -0.098 | -0.31  | -0.673 | 2.74E-07 |
| RP11-9G1.3  | -0.307 | -0.164 | -0.232 | -0.565 | -1.277 | 2.74E-07 |
| PREPL       | 0.103  | 0.054  | 0.132  | 0.456  | 0.153  | 2.75E-07 |
| TAX1BP1     | 0.329  | 0.239  | 0.131  | 0.479  | 0.338  | 2.79E-07 |
| RGS11       | -0.4   | 0.116  | 0.35   | -0.477 | -0.072 | 2.81E-07 |
| CCDC189     | -0.452 | -0.147 | -0.37  | -1.062 | -0.902 | 2.82E-07 |
| FAM102B     | 0.538  | -0.374 | -0.536 | -0.169 | -0.213 | 2.84E-07 |
| PDIA3       | 0.366  | 0.206  | 0.054  | 0.485  | 0.479  | 2.86E-07 |
| PDS5A       | 0.173  | 0.086  | -0.003 | 0.25   | 0.383  | 2.89E-07 |
| FASTKD3     | -0.264 | -0.14  | -0.185 | -0.624 | -0.743 | 2.89E-07 |
| CITED2      | 0.208  | 0.273  | 0.266  | 0.614  | 0.413  | 2.90E-07 |
| RP11-274B2  | -0.157 | 0.302  | 0.138  | -0.879 | -0.542 | 2.91E-07 |
| HPS5        | 0.089  | 0.162  | -0.016 | 0.03   | -0.424 | 2.92E-07 |
| SNORD99     | 0.074  | 0.033  | 0.095  | -0.874 | -0.972 | 2.92E-07 |
| OSTM1       | 0.247  | 0.227  | 0.21   | 0.437  | 0.35   | 2.94E-07 |
| NYAP1       | -0.934 | 0.014  | 0.344  | -0.114 | 0.172  | 2.94E-07 |
| MELK        | -0.045 | -0.047 | -0.2   | 0.055  | -0.417 | 2.94E-07 |
| MYH9        | 0.492  | 0.125  | 0.061  | 0.316  | 0.72   | 2.95E-07 |
| RP11-2C24.4 | -0.598 | -0.297 | -0.497 | -1.019 | -1.056 | 2.97E-07 |
| SOS1        | 0.033  | 0.165  | 0.137  | 0.061  | 0.351  | 2.98E-07 |
| NBPF25P     | -0.449 | -0.156 | 0.071  | -0.48  | -0.31  | 2.98E-07 |
| USP16       | 0.354  | 0.154  | 0.154  | 0.203  | -0.021 | 3.00E-07 |
| LUC7L3      | -0.439 | -0.028 | 0.126  | -0.496 | -0.266 | 3.01E-07 |
| GNA13       | 0.361  | 0.091  | -0.059 | 0.083  | 0.198  | 3.08E-07 |
| CTB-55O6.11 | -0.483 | -0.01  | 0.582  | 0.025  | 0.115  | 3.09E-07 |
| TTC14       | -0.662 | 0.019  | 0.08   | -0.593 | -0.265 | 3.10E-07 |

|             |        |        |        |        |        |          |
|-------------|--------|--------|--------|--------|--------|----------|
| ACVR2B      | 0.043  | 0.343  | -0.011 | -0.468 | -0.197 | 3.17E-07 |
| HSP90AA1    | 0.401  | 0.197  | 0.122  | 0.605  | 0.585  | 3.19E-07 |
| NTHL1       | -0.132 | -0.397 | -0.15  | 0.208  | 0.213  | 3.20E-07 |
| RP5-1182A1  | -0.582 | -0.01  | 0.075  | -0.847 | -0.83  | 3.20E-07 |
| N4BP1       | 0.254  | 0.101  | 0.079  | 0.207  | 0.468  | 3.22E-07 |
| MRFAP1      | 0.302  | 0.15   | 0.105  | 0.457  | 0.383  | 3.22E-07 |
| RP11-206L10 | 0.107  | 0.048  | -0.089 | -0.489 | -0.322 | 3.27E-07 |
| ZBTB7B      | 0.132  | 0.377  | 0.37   | 0.03   | 0.041  | 3.28E-07 |
| ZEB1-AS1    | -0.771 | -0.282 | 0.03   | -0.357 | -0.407 | 3.28E-07 |
| YARS2       | 0.105  | 0.07   | -0.05  | 0.229  | 0.419  | 3.29E-07 |
| A1BG-AS1    | -0.159 | 0.351  | 0.267  | -0.157 | -0.259 | 3.29E-07 |
| RELA        | 0.133  | 0.171  | 0.196  | 0.328  | 0.429  | 3.32E-07 |
| EPHA2       | 0.416  | 0.265  | 0.229  | 0.113  | 0.377  | 3.37E-07 |
| ZNF275      | 0.406  | 0.137  | -0.005 | -0.09  | 0.098  | 3.38E-07 |
| RAB23       | 0.403  | 0.094  | -0.113 | -0.049 | -0.033 | 3.38E-07 |
| TICAM1      | 0.518  | 0.253  | -0.031 | 0.172  | 0.59   | 3.39E-07 |
| ALDH16A1    | 0.004  | 0.042  | -0.06  | 0.004  | -0.521 | 3.40E-07 |
| NUDT12      | -0.175 | 0.144  | 0.251  | 0.169  | -0.329 | 3.42E-07 |
| DSTYK       | 0.455  | 0.247  | 0.079  | 0.248  | 0.367  | 3.43E-07 |
| DMAP1       | -0.135 | 0.011  | 0.021  | 0.016  | -0.369 | 3.45E-07 |
| RABGGTA     | 0.114  | 0.437  | 0.377  | 0.332  | 0.146  | 3.46E-07 |
| EEF1D       | 0.144  | 0.149  | 0.122  | 0.216  | 0.328  | 3.47E-07 |
| MPZL3       | -0.011 | -0.129 | 0.116  | 0.108  | -0.434 | 3.47E-07 |
| ADAR        | 0.161  | 0.09   | 0.077  | 0.292  | 0.474  | 3.50E-07 |
| WHAMML1     | -0.438 | -0.057 | -0.03  | -0.304 | -0.599 | 3.50E-07 |
| AMZ2        | 0.009  | 0.116  | 0.279  | 0.326  | 0.135  | 3.51E-07 |
| AC006465.4  | -0.758 | -0.953 | -1.104 | -0.54  | -0.371 | 3.51E-07 |
| CLTB        | 0.215  | 0.07   | -0.019 | 0.238  | 0.467  | 3.52E-07 |
| FAM53B      | -0.146 | -0.246 | -0.175 | 0.134  | 0.332  | 3.54E-07 |
| SOCS2       | 0.067  | 0.49   | 0.17   | -0.027 | 0.791  | 3.55E-07 |
| CTB-193M12  | -0.517 | -0.719 | -0.627 | -0.215 | -0.11  | 3.56E-07 |
| NXT2        | 0.067  | 0.112  | -0.063 | -0.152 | -0.658 | 3.56E-07 |
| ZNF331      | -0.578 | 0.01   | 0.255  | -0.421 | -0.418 | 3.58E-07 |
| TCP11L2     | -0.072 | 0.405  | 0.45   | 0.194  | 0.929  | 3.60E-07 |
| RP11-298J20 | -0.521 | 0.278  | 0.518  | -0.249 | -0.1   | 3.61E-07 |
| FAM110D     | -0.552 | -0.216 | -0.031 | 0.237  | 0.618  | 3.62E-07 |
| FAM168A     | -0.028 | 0.148  | 0.256  | 0.377  | 0.354  | 3.63E-07 |
| SLC41A2     | 0.289  | 0.537  | 0.394  | 0.381  | 0.564  | 3.64E-07 |

|            |        |        |        |        |        |          |
|------------|--------|--------|--------|--------|--------|----------|
| EXOC8      | 0.452  | 0.285  | 0.207  | 0.184  | 0.043  | 3.64E-07 |
| NAP1L5     | 0.376  | 0.115  | 0.117  | 0.46   | -0.22  | 3.64E-07 |
| KCTD5      | 0.445  | 0.138  | -0.215 | 0.109  | -0.025 | 3.66E-07 |
| AC136007.2 | -0.396 | 0.021  | 0.223  | -0.463 | -0.382 | 3.66E-07 |
| CBL        | 0.116  | 0.18   | 0.126  | 0.083  | 0.426  | 3.68E-07 |
| XPO6       | 0.147  | -0.106 | -0.193 | -0.061 | -0.395 | 3.68E-07 |
| KCTD10     | 0.372  | 0.092  | 0.016  | 0.137  | 0.173  | 3.71E-07 |
| CCDC34     | -0.07  | 0.033  | 0.078  | 0.52   | 0.003  | 3.71E-07 |
| SLC39A6    | -0.09  | 0.152  | 0.08   | 0.116  | 0.361  | 3.75E-07 |
| FTO        | 0.429  | 0.004  | 0.028  | 0.426  | 0.354  | 3.77E-07 |
| ZNF579     | 0.103  | 0.262  | 0.211  | 0.056  | 0.72   | 3.80E-07 |
| MYO1E      | 0.532  | 0.461  | 0.16   | 0.101  | 0.501  | 3.84E-07 |
| LRIG3      | -0.486 | -0.034 | -0.193 | -0.257 | 0.137  | 3.87E-07 |
| C1orf109   | -0.367 | -0.18  | -0.177 | -0.282 | -0.555 | 3.90E-07 |
| IMPA1      | 0.005  | -0.062 | -0.291 | -0.304 | -0.379 | 3.93E-07 |
| RP11-1152H | 0.323  | 0.231  | -0.07  | -0.656 | -1.096 | 3.94E-07 |
| RP11-555K1 | -0.554 | -0.062 | -0.012 | -0.632 | -0.682 | 3.95E-07 |
| SORBS1     | 0.504  | 0.174  | 0.178  | 0.15   | 0.626  | 3.96E-07 |
| SPIN3      | -0.677 | 0.138  | 0.145  | -0.367 | 0.1    | 3.96E-07 |
| TAF10      | -0.16  | -0.052 | -0.157 | -0.149 | 0.451  | 3.99E-07 |
| DHX29      | 0.232  | 0.075  | 0.06   | 0.5    | 0.31   | 3.99E-07 |
| CCDC191    | -0.741 | 0.1    | 0.481  | -0.015 | 0.301  | 3.99E-07 |
| CCDC84     | -0.251 | 0.046  | 0.129  | -0.582 | -0.545 | 4.08E-07 |
| PCCB       | 0.302  | 0.069  | 0.123  | 0.495  | 0.244  | 4.09E-07 |
| TRMT10B    | -0.353 | 0.059  | 0.011  | -0.454 | -0.491 | 4.11E-07 |
| PYROXD1    | 0.172  | -0.038 | -0.064 | 0.339  | -0.264 | 4.13E-07 |
| ANXA5      | 0.428  | 0.174  | 0.067  | 0.489  | 0.469  | 4.17E-07 |
| RP11-566K1 | -0.345 | -0.015 | -0.024 | 0.287  | 0.263  | 4.19E-07 |
| RP11-932O9 | -1.306 | -0.798 | -0.66  | -1.064 | -1.235 | 4.19E-07 |
| ANGPT2     | 0.408  | 0.112  | 0.193  | 0.557  | 0.403  | 4.21E-07 |
| RP11-395P1 | -0.481 | -0.234 | 0.268  | -0.625 | -0.422 | 4.21E-07 |
| RP11-180M1 | -0.911 | 0.076  | 0.282  | -0.776 | -0.847 | 4.21E-07 |
| DCAF4      | 0.078  | -0.074 | 0.203  | 0.222  | 0.501  | 4.23E-07 |
| ZNF277     | -0.276 | 0.014  | 0.109  | 0.022  | 0.417  | 4.23E-07 |
| NBPF15     | -0.376 | -0.218 | 0.186  | -0.431 | -0.06  | 4.23E-07 |
| CMTR2      | -0.373 | 0.057  | 0.026  | -0.082 | -0.16  | 4.23E-07 |
| ANKS3      | -0.597 | -0.056 | 0.036  | -0.511 | -0.425 | 4.23E-07 |
| PELI3      | 0.154  | 0.541  | 0.034  | -0.397 | 0.036  | 4.26E-07 |



|            |        |        |        |        |        |          |
|------------|--------|--------|--------|--------|--------|----------|
| NDUFAF5    | -0.282 | -0.165 | -0.145 | -0.707 | -0.529 | 4.30E-07 |
| CAPN10     | -0.515 | -0.062 | -0.056 | -0.447 | -0.276 | 4.32E-07 |
| RBAK       | 0.053  | 0.346  | 0.109  | -0.076 | -0.111 | 4.33E-07 |
| ANKRD34A   | -0.8   | 0.15   | 0.27   | 0.262  | -0.05  | 4.34E-07 |
| PDIA6      | 0.28   | 0.032  | -0.075 | 0.339  | 0.065  | 4.35E-07 |
| XPNPEP1    | 0.19   | 0.081  | 0.025  | 0.208  | 0.392  | 4.38E-07 |
| CAMSAP1    | 0.325  | 0.004  | -0.067 | 0.02   | 0.228  | 4.39E-07 |
| FAAP100    | -0.312 | -0.145 | -0.112 | -0.328 | -0.406 | 4.40E-07 |
| MIR3653    | -0.371 | 0.35   | 0.292  | -0.669 | -0.735 | 4.41E-07 |
| PPT2       | 0.03   | 0.166  | 0.065  | 0.114  | -0.35  | 4.42E-07 |
| TYRO3P     | 0.589  | -0.063 | -0.291 | -0.075 | -0.182 | 4.45E-07 |
| HMGA1L6    | -0.128 | -0.464 | -0.058 | 0.336  | 0.749  | 4.46E-07 |
| RP11-732A1 | -0.807 | -0.098 | 0.251  | -0.643 | -0.17  | 4.47E-07 |
| GIN1       | -0.609 | -0.073 | -0.021 | -0.159 | -0.573 | 4.49E-07 |
| PDIA2      | -0.097 | -0.173 | -0.522 | -1.21  | -0.776 | 4.50E-07 |
| GS1-309P15 | 0.284  | -0.046 | -0.402 | -0.24  | -0.307 | 4.54E-07 |
| DDX5       | -0.097 | 0.18   | 0.165  | -0.365 | -0.216 | 4.57E-07 |
| SEC61G     | -0.286 | -0.167 | -0.038 | -0.601 | -0.998 | 4.59E-07 |
| CUEDC2     | 0.096  | 0.065  | 0.049  | 0.28   | 0.463  | 4.61E-07 |
| RP5-1086D1 | -0.953 | -0.666 | -0.214 | -0.705 | -0.386 | 4.63E-07 |
| CTC-308K20 | 0.091  | -0.007 | 0.03   | 0.214  | 0.392  | 4.66E-07 |
| C19orf44   | -0.727 | 0.107  | 0.135  | -0.045 | -0.125 | 4.67E-07 |
| DTX2       | -0.416 | 0.263  | 0.106  | 0.201  | 0.26   | 4.70E-07 |
| HOXB6      | -0.424 | -0.36  | -0.24  | -0.424 | -0.347 | 4.70E-07 |
| RTN3       | 0.173  | 0.052  | -0.027 | 0.25   | 0.352  | 4.71E-07 |
| FARP1      | 0.027  | 0.036  | 0.102  | 0.142  | 0.323  | 4.72E-07 |
| METTL7A    | -0.515 | -0.55  | -0.44  | -0.092 | -0.512 | 4.74E-07 |
| RBBP7      | 0.182  | 0.07   | 0.015  | 0.314  | 0.4    | 4.79E-07 |
| RP11-215C7 | 0.365  | -0.02  | -0.176 | 0.212  | 0.184  | 4.79E-07 |
| CHMP3      | 0.342  | 0.143  | 0.104  | 0.298  | 0.309  | 4.81E-07 |
| CTNNA1     | 0.482  | 0.208  | 0.078  | 0.499  | 0.679  | 4.83E-07 |
| CASK       | 0.188  | 0.068  | 0.11   | 0.328  | 0.57   | 4.83E-07 |
| TMEM80     | -0.568 | -0.274 | -0.135 | -0.184 | -0.374 | 4.83E-07 |
| ASNSD1     | -0.129 | -0.034 | -0.12  | -0.336 | -0.596 | 4.88E-07 |
| GOT2       | 0.296  | 0.081  | 0.026  | 0.443  | 0.523  | 4.93E-07 |
| ZNF780B    | -0.647 | -0.08  | 0.059  | -0.352 | -0.171 | 4.93E-07 |
| RAB5A      | 0.418  | 0.157  | -0.034 | 0.121  | 0.207  | 4.95E-07 |
| SH3TC2     | -0.151 | -0.176 | 0.307  | 0.064  | -0.47  | 5.01E-07 |

|            |        |        |        |        |        |          |
|------------|--------|--------|--------|--------|--------|----------|
| CCDC152    | 0.149  | -0.009 | -0.047 | 0.336  | -0.693 | 5.04E-07 |
| ZNF684     | -0.37  | -0.243 | -0.477 | -0.639 | -0.92  | 5.04E-07 |
| MMP7       | 0.055  | -0.042 | -0.594 | -0.389 | -1.345 | 5.06E-07 |
| KIF21A     | 0.204  | 0.431  | 0.476  | 0.218  | 0.186  | 5.07E-07 |
| ITPR1      | 0.115  | 0.021  | -0.325 | -0.239 | -0.414 | 5.07E-07 |
| EPB41L4A   | 0.39   | 0.013  | -0.153 | -0.049 | 0.197  | 5.12E-07 |
| G3BP1      | 0.466  | 0.062  | 0.001  | 0.394  | 0.264  | 5.15E-07 |
| ANAPC10    | -0.143 | -0.03  | -0.012 | -0.279 | -0.759 | 5.15E-07 |
| PRPF4      | 0.098  | 0.083  | -0.1   | -0.002 | -0.392 | 5.17E-07 |
| TSNARE1    | -0.268 | 0.052  | 0.561  | 0.478  | 0.568  | 5.19E-07 |
| TUBA1C     | 0.059  | -0.225 | -0.326 | 0.009  | -0.241 | 5.20E-07 |
| ENTPD1     | 0.333  | -0.055 | -0.052 | -0.169 | 0.951  | 5.21E-07 |
| GUK1       | -0.177 | -0.138 | -0.177 | -0.409 | -0.352 | 5.21E-07 |
| OSBPL6     | -0.284 | -0.481 | -0.597 | -0.472 | -0.171 | 5.25E-07 |
| PAFAH1B3   | -0.162 | -0.153 | -0.215 | 0.162  | 0.354  | 5.28E-07 |
| PDLIM4     | 0.235  | 0.026  | -0.003 | 0.317  | 0.441  | 5.29E-07 |
| LYRM1      | -0.306 | 0.078  | 0.472  | 0.323  | 0.386  | 5.30E-07 |
| CIR1       | 0.307  | 0.357  | 0.166  | 0.587  | 0.509  | 5.31E-07 |
| THAP4      | 0.138  | -0.172 | -0.218 | 0.158  | 0.34   | 5.39E-07 |
| SPTSSA     | -0.203 | -0.161 | -0.177 | -0.449 | -0.553 | 5.39E-07 |
| DND1       | -0.193 | -0.096 | 0.05   | -1.073 | -0.854 | 5.40E-07 |
| TAGLN2P1   | 0.377  | 0.022  | 0.053  | 0.418  | 0.448  | 5.41E-07 |
| RP11-108M1 | 0.084  | -0.029 | 0.166  | 0.349  | 0.524  | 5.43E-07 |
| TMED2      | -0.05  | -0.077 | -0.128 | -0.335 | -0.454 | 5.45E-07 |
| FKBPL      | -0.344 | 0.002  | -0.162 | 0.167  | -0.627 | 5.48E-07 |
| TGFB1      | 0.442  | 0.078  | -0.187 | -0.017 | 0.194  | 5.50E-07 |
| AMZ2P1     | -0.53  | -0.031 | -0.06  | -0.642 | -0.766 | 5.51E-07 |
| PUS1       | -0.355 | -0.16  | -0.081 | -0.291 | -0.419 | 5.52E-07 |
| RP5-1070A1 | 0.118  | -0.186 | -0.269 | -0.273 | -0.612 | 5.53E-07 |
| METAP2     | 0.452  | 0.198  | 0.076  | 0.406  | 0.252  | 5.55E-07 |
| HIST1H2BD  | 0.147  | 0.264  | 0.759  | 1.123  | 1.246  | 5.56E-07 |
| CYB5RL     | -0.368 | -0.071 | 0.176  | -0.016 | -0.392 | 5.61E-07 |
| SLC35C2    | 0.155  | 0.283  | 0.348  | 0.098  | 0.299  | 5.63E-07 |
| DIS3L      | -0.024 | -0.236 | 0.091  | 0.336  | 0.059  | 5.69E-07 |
| PRKY       | 0.014  | 0.286  | 0.544  | -0.365 | 0.065  | 5.70E-07 |
| CYP2S1     | -0.306 | -0.111 | 0.2    | 0.362  | 0.044  | 5.70E-07 |
| FAM65A     | 0.341  | 0.158  | -0.023 | -0.041 | 0.142  | 5.72E-07 |
| TBP        | -0.015 | -0.048 | -0.044 | -0.301 | -0.398 | 5.78E-07 |

|             |        |        |        |        |        |          |
|-------------|--------|--------|--------|--------|--------|----------|
| PAQR6       | -0.16  | 0.424  | 0.107  | -0.619 | -0.87  | 5.78E-07 |
| CHRNA5      | 0.162  | 0.12   | -0.252 | -0.143 | -0.512 | 5.82E-07 |
| SLCO3A1     | 0.27   | 0.303  | 0.463  | 0.613  | 0.893  | 5.85E-07 |
| RARG        | 0.33   | -0.183 | -0.176 | 0.097  | -0.207 | 5.85E-07 |
| ZC3HAV1L    | -0.637 | -0.225 | -0.127 | -0.413 | -0.217 | 5.85E-07 |
| GLRX        | -0.067 | -0.496 | -0.384 | -0.276 | -0.289 | 5.85E-07 |
| PIGF        | -0.225 | -0.107 | -0.075 | -0.349 | -0.649 | 5.88E-07 |
| ARID3B      | -0.171 | 0.184  | 0.019  | -0.433 | -0.438 | 5.89E-07 |
| KRTCAP2     | 0.048  | -0.111 | -0.125 | -0.162 | -0.569 | 5.94E-07 |
| RP11-121L10 | 0.099  | -0.242 | -0.13  | 0.069  | -0.352 | 5.97E-07 |
| RP4-758J18. | -0.164 | -0.066 | 0.191  | -0.601 | -0.793 | 5.98E-07 |
| LSM6        | -0.213 | -0.21  | -0.101 | -0.381 | -0.818 | 6.06E-07 |
| NUB1        | 0.286  | 0.201  | 0.152  | 0.406  | 0.47   | 6.10E-07 |
| SNRNP48     | -0.033 | -0.024 | -0.192 | -0.37  | -0.352 | 6.17E-07 |
| ZNF280B     | -0.483 | -0.057 | -0.377 | -0.479 | -0.907 | 6.17E-07 |
| HYOU1       | 0.288  | 0.029  | -0.149 | 0.105  | -0.406 | 6.22E-07 |
| SCAMP1      | 0.105  | -0.046 | -0.011 | 0.142  | 0.341  | 6.23E-07 |
| DPYSL4      | 0.108  | 0.364  | 0.18   | 0.16   | 0.859  | 6.26E-07 |
| PCNP        | 0.169  | 0.228  | 0.219  | 0.199  | 0.375  | 6.26E-07 |
| PAPD7       | -0.137 | -0.299 | -0.275 | -0.524 | -0.369 | 6.27E-07 |
| GLG1        | 0.261  | 0.073  | -0.063 | 0.295  | 0.485  | 6.28E-07 |
| BROX        | 0.296  | 0.329  | 0.235  | 0.349  | 0.317  | 6.29E-07 |
| RP11-122K1  | -0.746 | -0.005 | -0.077 | -0.96  | -0.786 | 6.29E-07 |
| CTSL        | 0.255  | 0.063  | 0.005  | 0.425  | 0.307  | 6.31E-07 |
| GTF2E1      | -0.371 | -0.023 | -0.125 | 0.132  | 0.126  | 6.32E-07 |
| HCG11       | 0.259  | 0.318  | 0.468  | 0.79   | 0.626  | 6.39E-07 |
| ZPR1        | 0.329  | 0.149  | 0.046  | 0.146  | 0.109  | 6.45E-07 |
| MRPL18      | -0.19  | -0.19  | -0.037 | -0.069 | -0.417 | 6.45E-07 |
| PSMC2       | 0.385  | 0.22   | 0.046  | 0.38   | 0.059  | 6.48E-07 |
| RP11-809O1  | -0.434 | 0.271  | 0.753  | 0.552  | 0.647  | 6.49E-07 |
| MYNN        | -0.134 | 0.025  | 0.046  | -0.293 | -0.467 | 6.52E-07 |
| CNTNAP3     | -0.493 | -0.2   | 0.008  | -0.354 | -0.016 | 6.61E-07 |
| LRRC45      | -0.735 | -0.266 | -0.057 | -0.351 | -0.366 | 6.65E-07 |
| FBXL8       | -0.393 | 0.264  | 0.282  | -0.508 | -0.178 | 6.67E-07 |
| TERF2IP     | 0.245  | 0.166  | -0.098 | 0.263  | 0.406  | 6.68E-07 |
| VIP         | -0.049 | 0.786  | 1.26   | 0.29   | 0.451  | 6.69E-07 |
| USE1        | 0.036  | 0.174  | 0.164  | 0.003  | -0.332 | 6.69E-07 |
| LMF2        | -0.113 | 0.064  | -0.055 | -0.181 | -0.348 | 6.70E-07 |

|             |        |        |        |        |        |          |
|-------------|--------|--------|--------|--------|--------|----------|
| SCLT1       | -0.327 | -0.406 | -0.298 | 0.067  | -0.061 | 6.79E-07 |
| LARP4       | -0.05  | -0.009 | -0.234 | -0.209 | -0.471 | 6.81E-07 |
| PWP1        | 0.3    | 0.101  | 0.043  | 0.384  | 0.27   | 6.82E-07 |
| PXK         | 0.364  | 0.01   | -0.043 | 0.112  | 0.32   | 6.86E-07 |
| MORC3       | 0.261  | 0.287  | 0.19   | 0.186  | 0.403  | 6.91E-07 |
| GS1-251I9.4 | 0.058  | -0.002 | -0.201 | -0.029 | -0.384 | 6.91E-07 |
| MED14       | 0.147  | 0.133  | 0.132  | 0.356  | 0.443  | 6.94E-07 |
| MALAT1      | -0.375 | 0.173  | 0.389  | -0.571 | -0.353 | 6.94E-07 |
| NDUFS2      | 0.134  | -0.011 | 0.035  | 0.341  | 0.237  | 6.95E-07 |
| SEMA3C      | 0.09   | 0.345  | 0.199  | 0.403  | -0.057 | 7.08E-07 |
| SNRPD1      | 0.003  | -0.232 | -0.224 | -0.181 | -0.425 | 7.10E-07 |
| POLR2H      | -0.387 | -0.118 | 0.016  | -0.34  | -0.39  | 7.11E-07 |
| GOLT1B      | -0.102 | -0.015 | -0.055 | -0.576 | -0.615 | 7.13E-07 |
| EPN1        | 0.142  | -0.02  | -0.051 | 0.175  | 0.392  | 7.17E-07 |
| TMEM185A    | 0.031  | -0.005 | 0.072  | 0.176  | 0.501  | 7.26E-07 |
| CTSD        | 0.224  | 0.175  | 0.059  | 0.539  | 0.634  | 7.33E-07 |
| RP11-85K15  | 0.404  | 0.023  | 0.284  | 0.42   | 0.9    | 7.37E-07 |
| ZNF211      | -0.033 | 0.225  | 0.11   | -0.273 | -0.326 | 7.40E-07 |
| AC139713.1  | 0.339  | -0.32  | -0.652 | -0.472 | -0.937 | 7.40E-07 |
| LRP5L       | -0.403 | -0.201 | -0.071 | -0.939 | -0.791 | 7.44E-07 |
| PRKAB2      | 0.104  | 0.347  | 0.227  | -0.168 | -0.112 | 7.57E-07 |
| RP1-39G22.1 | -0.501 | -0.216 | -0.193 | -0.45  | -1.145 | 7.57E-07 |
| ARC         | 0.638  | 0.405  | 0.592  | 0.415  | 0.665  | 7.61E-07 |
| USHBP1      | -0.163 | 0.271  | 0.425  | -0.046 | 0.132  | 7.61E-07 |
| SENP1       | 0.126  | 0.082  | 0.059  | 0.042  | -0.352 | 7.62E-07 |
| CPSF3       | 0.196  | 0.144  | 0.126  | 0.487  | 0.158  | 7.67E-07 |
| PANX2       | 0.001  | 0.098  | -0.053 | -0.067 | -0.758 | 7.67E-07 |
| POLD1       | 0.044  | 0      | -0.187 | -0.209 | -0.432 | 7.70E-07 |
| RLIM        | 0.366  | 0.088  | -0.05  | 0.159  | 0.058  | 7.86E-07 |
| OMA1        | -0.137 | -0.153 | 0.157  | 0.264  | -0.492 | 7.86E-07 |
| SPSB3       | -0.357 | -0.019 | -0.007 | -0.23  | 0.202  | 7.88E-07 |
| SUSD1       | 0.343  | 0.121  | 0.128  | 0.356  | 0.458  | 7.90E-07 |
| C1orf233    | -0.493 | -0.402 | -0.214 | -0.136 | 0.673  | 7.93E-07 |
| NUP37       | -0.141 | -0.253 | -0.233 | -0.171 | -0.457 | 8.00E-07 |
| ZNF530      | 0.135  | -0.303 | -0.193 | -0.353 | -0.781 | 8.02E-07 |
| XXbac-BPG2  | -0.323 | -0.104 | 0.282  | -0.084 | 0.436  | 8.03E-07 |
| RP11-21K12  | -0.521 | 0.048  | 0.116  | -0.87  | -0.814 | 8.17E-07 |
| ZNF587B     | -0.19  | 0.065  | -0.068 | -0.202 | -0.601 | 8.24E-07 |

|             |        |        |        |        |        |          |
|-------------|--------|--------|--------|--------|--------|----------|
| WDR82       | 0.347  | -0.008 | -0.03  | 0.266  | 0.334  | 8.26E-07 |
| MECP2       | 0.258  | 0.03   | 0.086  | 0.148  | 0.362  | 8.27E-07 |
| PRRC1       | 0.548  | 0.171  | 0.12   | 0.338  | 0.447  | 8.37E-07 |
| P4HB        | 0.21   | 0.077  | -0.027 | 0.373  | 0.416  | 8.47E-07 |
| RSU1        | 0.402  | 0.046  | -0.102 | 0.25   | 0.345  | 8.50E-07 |
| MTF2        | -0.035 | -0.153 | -0.368 | -0.251 | -0.168 | 8.58E-07 |
| CTA-390C10  | -0.498 | -0.077 | 0.435  | -0.103 | 0.612  | 8.61E-07 |
| TMEM68      | 0.047  | 0.472  | 0.434  | -0.128 | 0.089  | 8.69E-07 |
| SETD4       | -0.471 | 0.046  | 0.13   | -0.377 | -0.389 | 8.69E-07 |
| RP11-428C1  | 0.417  | 0.501  | 0.289  | -0.013 | -0.361 | 8.71E-07 |
| FAM84B      | -0.314 | 0.1    | -0.267 | -0.334 | -0.401 | 8.74E-07 |
| CEP350      | -0.145 | 0.064  | -0.068 | -0.378 | -0.437 | 8.77E-07 |
| ABCB1       | 0.051  | 0.453  | 0.074  | 0.27   | -0.597 | 8.77E-07 |
| AC007246.3  | -0.372 | -0.122 | 0.086  | 0.058  | 0.875  | 8.83E-07 |
| RBM15       | 0.147  | -0.019 | -0.036 | 0      | -0.414 | 8.83E-07 |
| TARBP2      | -0.258 | -0.29  | -0.243 | -0.317 | -0.414 | 8.99E-07 |
| CFAP44      | -0.473 | 0.181  | 0.395  | -0.479 | -0.183 | 9.01E-07 |
| TECPR2      | -0.044 | 0.188  | 0.194  | 0.236  | 0.415  | 9.03E-07 |
| ZNF133      | -0.059 | 0.332  | 0.227  | -0.207 | -0.238 | 9.03E-07 |
| AMD1        | -0.137 | -0.291 | -0.34  | -0.352 | -0.368 | 9.05E-07 |
| TUBA8       | 0.211  | -0.257 | -0.292 | -0.083 | -0.448 | 9.05E-07 |
| POLR2K      | -0.098 | 0.044  | 0.081  | -0.295 | -0.444 | 9.09E-07 |
| RP13-136L2. | 0.337  | -0.032 | -0.129 | 0.181  | 0.021  | 9.10E-07 |
| GPX7        | 0.106  | -0.09  | -0.183 | -0.128 | -0.437 | 9.16E-07 |
| KDM3B       | 0.07   | 0.039  | 0.022  | 0.175  | 0.441  | 9.26E-07 |
| CTD-3222D1  | -0.402 | -0.367 | -0.301 | -1.205 | -0.97  | 9.27E-07 |
| SPATA5      | -0.112 | 0.252  | -0.031 | -0.012 | -0.345 | 9.29E-07 |
| CCNK        | 0.431  | 0.36   | 0.282  | 0.344  | 0.38   | 9.31E-07 |
| VCPIP1      | 0.46   | 0.394  | 0.129  | 0.318  | 0.384  | 9.46E-07 |
| PTK2B       | 0.15   | 0.131  | 0.417  | 0.597  | 0.322  | 9.49E-07 |
| USP4        | 0.089  | 0.093  | 0.24   | 0.369  | 0.214  | 9.57E-07 |
| RP11-416K2  | 0.204  | -0.153 | -0.115 | -0.008 | -0.477 | 9.63E-07 |
| RP11-772E1  | -0.137 | -0.341 | -0.211 | -0.744 | -0.796 | 9.68E-07 |
| ITGB1BP2    | -0.523 | 0.008  | -0.014 | -0.975 | -1.203 | 9.70E-07 |
| MRPS7       | -0.067 | -0.107 | -0.147 | -0.042 | -0.334 | 9.73E-07 |
| RP11-152F1: | -0.593 | 0.008  | 0.002  | -0.847 | -0.73  | 9.76E-07 |
| DHRS12      | -0.029 | 0.084  | 0.054  | 0.031  | 0.941  | 9.79E-07 |
| MSH2        | 0.409  | 0.105  | -0.162 | 0.062  | -0.232 | 9.82E-07 |

|            |        |        |        |        |        |          |
|------------|--------|--------|--------|--------|--------|----------|
| RPP25L     | -0.405 | -0.22  | -0.161 | 0.165  | -0.314 | 9.82E-07 |
| TDRKH      | -0.087 | -0.016 | 0.064  | 0.441  | 0.491  | 9.94E-07 |
| EIF2B5     | -0.072 | -0.037 | -0.009 | -0.023 | -0.343 | 9.95E-07 |
| GAPDH      | 0.307  | 0.099  | 0.069  | 0.482  | 0.459  | 1.01E-06 |
| RP11-473N1 | 0.37   | -0.109 | -0.114 | 0.197  | -0.231 | 1.01E-06 |
| CUTC       | -0.104 | -0.108 | -0.003 | 0.126  | -0.428 | 1.01E-06 |
| SWT1       | 0.05   | 0.484  | 0.748  | 0.519  | 0.569  | 1.02E-06 |
| SMAD4      | 0.271  | 0.179  | 0.108  | 0.152  | 0.348  | 1.02E-06 |
| GALT       | -0.598 | -0.092 | 0.053  | -0.311 | -0.144 | 1.02E-06 |
| DISC1      | 0.391  | -0.206 | 0.198  | 0.238  | 0.483  | 1.03E-06 |
| AC007238.1 | 0.383  | 0.122  | 0.132  | 0.579  | 0.408  | 1.03E-06 |
| CTD-2324A2 | 0.289  | -0.01  | 0.013  | 0.427  | 0.379  | 1.03E-06 |
| ULBP1      | 0.503  | 0.92   | 0.93   | 1.013  | 0.342  | 1.03E-06 |
| MIR3191    | 0.909  | 1.228  | 1.391  | 0.48   | 0.84   | 1.04E-06 |
| ARID3A     | 0.053  | 0.153  | 0.198  | 0.223  | 0.573  | 1.04E-06 |
| CTD-2017F1 | -0.469 | -0.158 | 0.072  | -0.983 | -1.014 | 1.04E-06 |
| PRPF40A    | 0.362  | 0.252  | 0.08   | 0.311  | 0.306  | 1.06E-06 |
| SP2        | 0.505  | 0.119  | 0.093  | 0.185  | -0.012 | 1.06E-06 |
| RP5-854E16 | -0.049 | -0.106 | 0.013  | -0.388 | -0.488 | 1.06E-06 |
| PPCDC      | -0.322 | -0.044 | 0.054  | -0.218 | -0.564 | 1.06E-06 |
| MTFP1      | -0.17  | -0.162 | -0.111 | -0.08  | -0.61  | 1.06E-06 |
| RP11-303E1 | -0.452 | -0.011 | 0.24   | -0.809 | -0.913 | 1.06E-06 |
| ZNF189     | -0.269 | 0.005  | -0.227 | -0.479 | -0.238 | 1.07E-06 |
| DHH        | 0.072  | -0.306 | -0.484 | -0.122 | -0.392 | 1.07E-06 |
| PSEN2      | 0.139  | 0.013  | 0.098  | 0.394  | 0.613  | 1.08E-06 |
| TLK1       | 0.176  | 0.046  | 0.056  | 0.157  | 0.349  | 1.09E-06 |
| AGPS       | 0.412  | -0.032 | -0.163 | 0.145  | 0.159  | 1.10E-06 |
| PINLYP     | -0.855 | 0.241  | 0.416  | -0.328 | -0.214 | 1.10E-06 |
| NORAD      | 0.365  | 0.302  | 0.191  | 0.355  | 0.461  | 1.12E-06 |
| LY6E       | 0.051  | -0.014 | -0.016 | 0.287  | 0.437  | 1.12E-06 |
| CPNE7      | -0.311 | -0.073 | 0.045  | -0.716 | 0.045  | 1.12E-06 |
| FAM45A     | -0.069 | -0.028 | -0.113 | 0.07   | 0.461  | 1.13E-06 |
| CARS2      | -0.127 | -0.089 | -0.102 | -0.392 | -0.334 | 1.13E-06 |
| OSGEPL1    | -0.535 | -0.356 | -0.032 | 0.164  | -0.378 | 1.13E-06 |
| SMO        | 0.004  | 0.067  | -0.605 | -0.842 | -0.569 | 1.13E-06 |
| RP11-298C3 | 0.139  | -0.116 | -0.165 | 0.013  | -0.355 | 1.14E-06 |
| ZNF777     | 0.391  | -0.02  | -0.105 | 0.201  | 0.465  | 1.15E-06 |
| FBXO33     | 0.514  | 0.39   | 0.275  | 0.295  | 0.309  | 1.15E-06 |

|            |        |        |        |        |        |          |
|------------|--------|--------|--------|--------|--------|----------|
| ARHGAP27   | -0.028 | -0.02  | 0.253  | -0.385 | 0.094  | 1.15E-06 |
| IKBKE      | 0.091  | -0.036 | 0.057  | -0.001 | 0.337  | 1.16E-06 |
| SNX2       | 0.327  | 0.231  | 0.102  | 0.514  | 0.43   | 1.17E-06 |
| SDSL       | 0.151  | 0.009  | 0.11   | 0.599  | 0.247  | 1.17E-06 |
| TMEM42     | -0.712 | -0.208 | 0.091  | -0.281 | -0.123 | 1.17E-06 |
| ACD        | 0.04   | -0.074 | -0.333 | -0.308 | -0.39  | 1.17E-06 |
| DUX4L50    | 0.717  | 1.317  | 1.246  | 0.812  | 1.544  | 1.18E-06 |
| KB-431C1.4 | -0.163 | 0.592  | 0.916  | 0.54   | 0.926  | 1.18E-06 |
| SGSH       | -0.075 | 0.053  | -0.092 | -0.034 | -0.33  | 1.18E-06 |
| CKS2       | -1.135 | -0.916 | -0.563 | -0.96  | -0.798 | 1.18E-06 |
| RP11-566E1 | 0.233  | -0.127 | -0.205 | -0.146 | 0.75   | 1.20E-06 |
| AK5        | 0.208  | -0.055 | 0.115  | 0.612  | 0.206  | 1.20E-06 |
| PTBP2      | -0.21  | -0.007 | -0.047 | -0.683 | -0.449 | 1.20E-06 |
| AHCYL1     | 0.332  | 0.151  | 0.091  | 0.306  | 0.384  | 1.21E-06 |
| DDRGK1     | 0.006  | -0.002 | -0.031 | 0.106  | -0.328 | 1.21E-06 |
| DPAGT1     | -0.189 | -0.212 | -0.213 | -0.251 | -0.364 | 1.21E-06 |
| DARS2      | 0.06   | -0.045 | 0.021  | 0.483  | 0.192  | 1.22E-06 |
| ACAD11     | -0.654 | 0.042  | 0.41   | -0.489 | -0.013 | 1.22E-06 |
| CSDE1      | 0.338  | 0.134  | 0.079  | 0.299  | 0.393  | 1.23E-06 |
| C16orf13   | -0.353 | -0.153 | -0.1   | -0.28  | 0.098  | 1.23E-06 |
| CTD-3184A7 | -0.456 | -0.109 | 0.014  | -0.728 | -0.895 | 1.24E-06 |
| GRB2       | 0.31   | 0.063  | -0.124 | 0.247  | 0.371  | 1.25E-06 |
| TSPAN1     | 0.153  | 0.231  | 0.817  | 0.798  | 1.037  | 1.26E-06 |
| RP11-665C1 | 0.397  | 0.106  | 0.297  | 0.575  | 0.808  | 1.26E-06 |
| MFN1       | 0.12   | 0.157  | 0.155  | 0.326  | 0.312  | 1.26E-06 |
| PAICS      | 0.352  | 0.054  | -0.193 | 0.04   | -0.145 | 1.26E-06 |
| RP11-134K1 | 0.26   | -0.353 | -0.293 | -0.041 | 0.205  | 1.27E-06 |
| GPR137C    | 0.394  | 0.319  | 0.07   | -0.273 | -0.523 | 1.27E-06 |
| BMS1P4     | -0.748 | 0.006  | 0.241  | -0.82  | -0.654 | 1.27E-06 |
| NPFF       | -0.538 | -0.196 | 0.306  | -0.756 | -0.766 | 1.27E-06 |
| PPID       | 0.093  | 0.096  | 0.173  | 0.406  | 0.303  | 1.30E-06 |
| RP1-159M24 | 0.455  | 0.055  | 0.152  | 0.541  | -0.101 | 1.30E-06 |
| ACCS       | -0.77  | -0.1   | 0.07   | -0.633 | -0.146 | 1.30E-06 |
| TMEM39A    | -0.064 | -0.042 | -0.023 | -0.377 | -0.328 | 1.31E-06 |
| NBPF20     | -0.448 | 0.021  | 0.152  | -0.551 | -0.347 | 1.31E-06 |
| ARMCX5     | 0.067  | 0.037  | -0.007 | 0.074  | -0.411 | 1.31E-06 |
| RP11-446E9 | -0.025 | 0.065  | -0.033 | -0.042 | -0.332 | 1.32E-06 |
| RP11-390P2 | -0.575 | -0.264 | -0.356 | -0.861 | -0.898 | 1.32E-06 |

|             |        |        |        |        |        |          |
|-------------|--------|--------|--------|--------|--------|----------|
| PTOV1       | 0.115  | 0.083  | 0.05   | 0.121  | 0.428  | 1.33E-06 |
| PDIA3P1     | 0.365  | 0.096  | 0.019  | 0.468  | 0.335  | 1.33E-06 |
| FAM86HP     | -0.526 | 0.381  | 0.791  | 0.009  | 0.175  | 1.33E-06 |
| HNRNPA0     | 0.327  | -0.084 | -0.239 | 0.132  | 0.092  | 1.34E-06 |
| TMEM126A    | -0.273 | -0.147 | -0.113 | -0.466 | -0.754 | 1.35E-06 |
| C11orf96    | 1.024  | -0.122 | 0.038  | 0.381  | 0.954  | 1.36E-06 |
| SF3A3       | 0.385  | 0.189  | 0.126  | 0.468  | 0.354  | 1.36E-06 |
| PKN3        | -0.235 | -0.179 | -0.094 | -0.194 | -0.482 | 1.36E-06 |
| DLEU1       | -0.315 | -0.323 | -0.3   | -0.351 | -0.831 | 1.37E-06 |
| KIFC3       | 0.194  | -0.05  | 0.041  | 0.23   | 0.351  | 1.38E-06 |
| SDHA        | 0.253  | 0.198  | 0.196  | 0.68   | 0.298  | 1.39E-06 |
| DMXL2       | -0.196 | 0.014  | 0.117  | -0.101 | -0.347 | 1.39E-06 |
| RP11-216L1  | -0.662 | -0.037 | -0.135 | -0.588 | -1.024 | 1.39E-06 |
| SDE2        | 0.382  | 0.096  | -0.142 | -0.004 | -0.097 | 1.40E-06 |
| MFSD4B      | -0.544 | 0.053  | 0.162  | -0.067 | -0.141 | 1.40E-06 |
| LIAS        | -0.276 | -0.108 | 0.063  | -0.216 | -0.531 | 1.40E-06 |
| SNORA10     | -0.376 | 0.042  | -0.283 | -0.974 | -1.286 | 1.40E-06 |
| RP11-351N4  | 0.385  | -0.125 | 0.064  | 0.555  | 0.383  | 1.41E-06 |
| BCLAF1P2    | 0.466  | 0.098  | -0.078 | 0.191  | -0.191 | 1.41E-06 |
| RP11-55L3.2 | 0.354  | -0.041 | 0.018  | 0.396  | 0.609  | 1.45E-06 |
| C14orf156   | -0.315 | -0.307 | -0.228 | -0.593 | -0.671 | 1.45E-06 |
| RP11-5C23.3 | -0.519 | -0.057 | -0.122 | -0.84  | -0.809 | 1.45E-06 |
| CARF        | -0.294 | 0.125  | 0.599  | -0.007 | 0.025  | 1.47E-06 |
| AC006273.5  | -0.602 | -0.23  | 0.505  | -0.314 | -0.408 | 1.47E-06 |
| SYBU        | 0.005  | -0.237 | -0.429 | -0.471 | -0.807 | 1.47E-06 |
| VWF         | 0.31   | 0.056  | -0.067 | 0.24   | 0.558  | 1.48E-06 |
| RP11-153A2  | -0.424 | -0.295 | 0.438  | 0.018  | 0.035  | 1.48E-06 |
| ARFGEF3     | 0.502  | 0.051  | 0.085  | 0.167  | 0.027  | 1.48E-06 |
| STPG1       | 0.068  | 0.067  | 0.422  | 0.62   | 0.438  | 1.49E-06 |
| RP11-902B1  | -0.39  | 0.091  | 0.425  | -0.122 | -0.166 | 1.49E-06 |
| LRP6        | -0.008 | -0.14  | -0.268 | -0.259 | -0.358 | 1.49E-06 |
| RP11-392O1  | -0.776 | -0.395 | -0.048 | -0.491 | 0.581  | 1.50E-06 |
| RP3-523C21  | -0.642 | -0.486 | -0.45  | -0.678 | -0.806 | 1.51E-06 |
| PRKAR1A     | 0.408  | 0.167  | 0.085  | 0.462  | 0.484  | 1.53E-06 |
| SEL1L3      | 0.255  | 0.105  | 0.089  | 0.375  | 0.311  | 1.53E-06 |
| RP11-568J2  | -0.191 | -0.069 | 1.069  | 0.176  | 0.86   | 1.54E-06 |
| HTR1D       | 0.774  | 0.482  | 0.78   | 1.043  | 0.603  | 1.54E-06 |
| ARSB        | 0.295  | 0.194  | -0.001 | 0.268  | 0.323  | 1.54E-06 |



|             |        |        |        |        |        |          |
|-------------|--------|--------|--------|--------|--------|----------|
| KLF5        | 0.944  | 0.456  | 0.351  | 0.407  | -0.102 | 1.54E-06 |
| CEP85L      | 0.287  | 0.451  | 0.353  | -0.123 | 0.244  | 1.55E-06 |
| TTC39C      | 0.477  | 0.608  | 0.612  | 0.409  | 0.905  | 1.56E-06 |
| RP5-905H16  | -0.287 | 0.234  | 0.096  | -1.052 | -0.492 | 1.56E-06 |
| CYB5R4      | -0.067 | 0.1    | -0.127 | -0.229 | -0.533 | 1.56E-06 |
| HNRNPD      | 0.347  | 0.13   | 0.022  | 0.128  | -0.126 | 1.57E-06 |
| MED18       | -0.378 | -0.252 | -0.107 | 0.084  | -0.263 | 1.57E-06 |
| PPP2R3C     | 0.021  | 0.055  | -0.043 | -0.097 | -0.389 | 1.58E-06 |
| MYBBP1A     | 0.013  | -0.116 | -0.117 | -0.122 | -0.463 | 1.58E-06 |
| RP11-46D6.1 | -0.067 | -0.332 | -0.069 | 0.165  | 0.678  | 1.59E-06 |
| NOCT        | 0.306  | 0.251  | -0.058 | 0.028  | 0.446  | 1.60E-06 |
| ABHD4       | 0.398  | 0.515  | 0.352  | 0.447  | 0.423  | 1.60E-06 |
| AC005822.1  | 0.283  | -0.081 | -0.071 | -0.439 | -0.249 | 1.61E-06 |
| AC073150.4  | 0.398  | 0.241  | 0.199  | 0.531  | 0.518  | 1.62E-06 |
| CWC27       | 0.314  | 0.059  | 0.138  | 0.393  | 0.379  | 1.62E-06 |
| MTERF4      | -0.09  | 0.048  | 0.057  | -0.159 | -0.327 | 1.62E-06 |
| C18orf54    | -0.252 | -0.12  | -0.204 | -0.071 | -0.426 | 1.62E-06 |
| MIR5587     | -0.479 | -0.189 | -0.031 | -1.134 | -1.207 | 1.63E-06 |
| SNORD46     | -0.331 | -0.281 | -0.197 | -1.113 | -1.256 | 1.63E-06 |
| NCAPD2      | -0.127 | -0.221 | -0.099 | 0.35   | 0.193  | 1.64E-06 |
| SRRM1       | 0.328  | 0.156  | -0.006 | 0.05   | 0.009  | 1.64E-06 |
| SLC25A37    | -0.283 | -0.288 | 0.205  | -0.52  | -0.29  | 1.64E-06 |
| TUT1        | -0.483 | -0.25  | -0.092 | -0.01  | -0.359 | 1.64E-06 |
| SLC25A16    | 0.045  | 0.018  | -0.064 | -0.213 | -0.405 | 1.65E-06 |
| QTRT2       | -0.079 | -0.066 | -0.142 | -0.113 | -0.418 | 1.65E-06 |
| IFI35       | 0.005  | -0.148 | -0.076 | 0.356  | 0.446  | 1.66E-06 |
| RP11-45F23  | 0.548  | -0.068 | -0.285 | 0.456  | 0.465  | 1.68E-06 |
| TTC7A       | 0.186  | -0.06  | 0.22   | 0.193  | 0.363  | 1.68E-06 |
| UBE2HP      | 0.187  | 0.217  | 0.405  | 0.537  | 1.131  | 1.69E-06 |
| USO1        | 0.297  | 0.11   | 0.115  | 0.414  | 0.252  | 1.69E-06 |
| H2AFJ       | -0.104 | -0.18  | -0.139 | 0.13   | -0.422 | 1.69E-06 |
| ZNF224      | -0.144 | 0.21   | 0.197  | -0.39  | -0.181 | 1.71E-06 |
| ZNF718      | -0.071 | -0.116 | -0.478 | -0.559 | -0.44  | 1.71E-06 |
| MXI1        | 0.35   | 0.288  | 0.366  | 0.263  | 0.891  | 1.72E-06 |
| SPAG16      | 0.067  | -0.148 | 0.15   | 0.292  | 0.683  | 1.72E-06 |
| ORMDL1      | -0.336 | 0.127  | 0.05   | -0.47  | -0.425 | 1.72E-06 |
| MIR570      | 0.117  | 0.597  | 0.404  | -0.529 | -0.48  | 1.72E-06 |
| C4orf33     | -0.276 | -0.184 | -0.27  | -0.451 | -0.815 | 1.72E-06 |

|             |        |        |        |        |        |          |
|-------------|--------|--------|--------|--------|--------|----------|
| ZNF524      | -0.254 | 0.037  | 0.094  | 0.213  | 0.365  | 1.73E-06 |
| PRC1        | -0.242 | -0.493 | -0.586 | -0.188 | -0.327 | 1.73E-06 |
| RP11-418J11 | -0.059 | 0.392  | 0.555  | 0.352  | 0.447  | 1.75E-06 |
| GNB1        | 0.374  | 0.08   | -0.071 | 0.24   | 0.413  | 1.75E-06 |
| PMM2        | 0.436  | 0.167  | 0.009  | 0.228  | 0.172  | 1.76E-06 |
| TRBC2       | -0.369 | -0.124 | 0.192  | 0.336  | 0.178  | 1.78E-06 |
| ANKRD39     | -0.066 | -0.145 | -0.234 | -0.187 | -0.661 | 1.78E-06 |
| MBD5        | 0.378  | 0.46   | 0.531  | 0.434  | 0.55   | 1.80E-06 |
| ABCB7       | 0.121  | 0.075  | 0.11   | 0.334  | 0.37   | 1.80E-06 |
| ACTR3       | 0.393  | 0.115  | -0.026 | 0.319  | 0.332  | 1.80E-06 |
| EIF4H       | 0.425  | 0.289  | 0.227  | 0.528  | 0.472  | 1.81E-06 |
| ZMAT1       | -0.76  | -0.034 | 0.398  | -0.173 | 0.133  | 1.82E-06 |
| PHC1B       | -0.154 | 0.059  | 0.085  | -0.379 | -0.294 | 1.82E-06 |
| RP11-402L11 | 0.397  | -0.119 | -0.201 | 0.323  | 0.357  | 1.84E-06 |
| ZSCAN20     | -0.482 | 0.054  | 0.186  | -0.289 | -0.186 | 1.85E-06 |
| LGMN        | 0.319  | 0.145  | -0.001 | 0.442  | 0.375  | 1.86E-06 |
| ITGB1BP1    | -0.241 | -0.144 | -0.033 | -0.303 | -0.475 | 1.88E-06 |
| RP11-304L11 | -0.124 | -0.077 | -0.122 | -1.252 | -0.828 | 1.88E-06 |
| FAF1        | 0.337  | 0.055  | 0.072  | 0.421  | 0.138  | 1.89E-06 |
| KMT2A       | -0.152 | 0.092  | 0.06   | -0.347 | 0.08   | 1.93E-06 |
| BAG2        | -0.236 | -0.264 | -0.294 | -0.217 | -0.378 | 1.94E-06 |
| MCEE        | -0.189 | -0.059 | -0.038 | -0.401 | -0.812 | 1.95E-06 |
| CCDC138     | -0.348 | -0.52  | -0.435 | -0.509 | -0.894 | 1.95E-06 |
| RP11-399O1  | 0.944  | 1.072  | 1.061  | 0.452  | 1.385  | 1.99E-06 |
| TARS        | 0.319  | 0.06   | 0.011  | 0.468  | 0.356  | 1.99E-06 |
| AFG3L2      | 0.326  | 0.076  | -0.118 | 0.122  | -0.014 | 1.99E-06 |
| GDAP1       | 0.504  | 0.412  | 0.148  | 0.145  | -0.807 | 1.99E-06 |
| RBM23       | 0.25   | 0.281  | 0.236  | 0.449  | 0.069  | 2.02E-06 |
| PTPDC1      | -0.167 | -0.165 | -0.191 | -0.586 | -0.527 | 2.02E-06 |
| DDR1        | 0.489  | 0.287  | 0.059  | 0.014  | -0.002 | 2.03E-06 |
| CHST14      | 0.147  | 0.249  | 0.169  | 0.54   | 0.408  | 2.05E-06 |
| ATP6V1B2    | 0.388  | 0.259  | 0.08   | 0.43   | 0.433  | 2.06E-06 |
| SETD1B      | 0.052  | -0.051 | -0.178 | -0.323 | -0.245 | 2.06E-06 |
| POLR3B      | 0.334  | 0.03   | 0.017  | 0.335  | -0.269 | 2.06E-06 |
| PLCD1       | 0.358  | 0.383  | 0.363  | 0.446  | 0.504  | 2.07E-06 |
| SNORA57     | -0.295 | 0.05   | 0.221  | -0.944 | -0.993 | 2.09E-06 |
| ARHGAP42    | 0.039  | 0.319  | -0.085 | 0.19   | 0.578  | 2.11E-06 |
| IL1RAP      | 0.137  | 0.255  | -0.079 | 0.106  | 0.498  | 2.11E-06 |

|              |        |        |        |        |        |          |
|--------------|--------|--------|--------|--------|--------|----------|
| OXCT1        | 0.159  | 0.082  | 0.043  | 0.374  | 0.382  | 2.11E-06 |
| RP11-18114.1 | -0.971 | -0.314 | -0.03  | -0.723 | -0.932 | 2.12E-06 |
| TCF12        | 0.005  | 0.015  | -0.081 | 0.185  | 0.352  | 2.14E-06 |
| SIN3A        | 0.451  | 0.232  | -0.025 | 0.068  | 0.144  | 2.14E-06 |
| CTD-2368P2   | -0.434 | 0.225  | 0.798  | -0.077 | 0.24   | 2.15E-06 |
| RP1-128M12   | 0.293  | -0.033 | -0.01  | 0.38   | 0.245  | 2.16E-06 |
| B3GNT2       | 0.156  | -0.013 | -0.326 | -0.205 | -0.012 | 2.16E-06 |
| SETD5        | -0.037 | -0.14  | -0.093 | -0.407 | -0.22  | 2.16E-06 |
| RP11-1094M   | -0.331 | -0.578 | -0.556 | -0.58  | -1.158 | 2.17E-06 |
| RASSF1       | -0.178 | -0.212 | -0.164 | -0.184 | -0.437 | 2.18E-06 |
| PLEKHF2      | 0.363  | 0.058  | -0.04  | -0.054 | 0.083  | 2.19E-06 |
| RP11-1K11.1  | 0.238  | -0.04  | -0.238 | 0.002  | -0.33  | 2.19E-06 |
| C6orf136     | -0.221 | -0.006 | -0.131 | -0.22  | -0.592 | 2.19E-06 |
| DNAJC13      | 0.182  | 0.117  | 0.2    | 0.368  | 0.413  | 2.21E-06 |
| TFRC         | 0.141  | 0.041  | 0.011  | 0.326  | 0.386  | 2.21E-06 |
| MGARP        | 0.232  | 0.944  | 0.672  | 1.084  | 1.216  | 2.23E-06 |
| ALDH4A1      | -0.151 | 0.003  | 0.086  | 0.154  | 0.442  | 2.23E-06 |
| PSME2        | -0.088 | 0.189  | 0.183  | 0.022  | 0.374  | 2.23E-06 |
| PCK2         | -0.039 | 0.076  | 0.244  | 0.521  | 0.062  | 2.23E-06 |
| TAOK1        | 0.116  | 0.22   | 0.024  | 0.091  | 0.427  | 2.26E-06 |
| LDHA         | 0.333  | 0.074  | 0.002  | 0.426  | 0.389  | 2.27E-06 |
| CLEC16A      | -0.14  | 0.044  | 0.162  | 0.272  | 0.325  | 2.30E-06 |
| RP11-164A7   | 0.113  | 0.257  | 0.099  | 0.136  | 0.423  | 2.31E-06 |
| MOK          | -0.292 | 0.027  | -0.018 | -0.542 | -0.443 | 2.31E-06 |
| NOXA1        | -0.399 | 0.059  | 0.912  | 0.574  | 0.726  | 2.32E-06 |
| TSEN34       | 0.106  | 0.031  | -0.055 | 0.256  | 0.429  | 2.33E-06 |
| CROCC        | -0.372 | -0.009 | 0.238  | -0.256 | -0.179 | 2.33E-06 |
| AC004057.1   | -0.189 | -0.141 | -0.12  | -0.274 | -0.567 | 2.33E-06 |
| KLHL25       | 0.375  | 0.02   | -0.282 | -0.083 | 0.357  | 2.34E-06 |
| ACP2         | 0.062  | -0.113 | -0.311 | 0.033  | -0.461 | 2.34E-06 |
| RRAGB        | -0.478 | -0.237 | -0.065 | -0.565 | -0.382 | 2.35E-06 |
| LRP1         | -0.029 | 0.446  | 0.702  | 0.613  | 0.88   | 2.36E-06 |
| NCOA3        | 0.319  | 0.303  | 0.26   | 0.131  | 0.324  | 2.36E-06 |
| SARS         | 0.304  | 0.163  | 0.175  | 0.542  | 0.258  | 2.37E-06 |
| XXbac-BPG5   | -0.111 | 0.185  | 0.002  | -0.289 | -0.489 | 2.38E-06 |
| RP11-50B3.4  | -0.502 | -0.064 | -0.027 | -1.143 | -0.854 | 2.38E-06 |
| RUFY3        | -0.186 | 0.024  | 0.111  | -0.498 | -0.263 | 2.39E-06 |
| CWF19L2      | 0.254  | 0.261  | -0.033 | 0.346  | -0.104 | 2.40E-06 |

|             |        |        |        |        |        |          |
|-------------|--------|--------|--------|--------|--------|----------|
| HMGN3       | -0.42  | -0.335 | -0.239 | -0.585 | -0.656 | 2.41E-06 |
| GPD1L       | 0.169  | 0.007  | -0.031 | 0.399  | 0.451  | 2.42E-06 |
| OSMR        | 0.12   | 0.229  | 0.224  | 0.473  | 0.068  | 2.42E-06 |
| OGFR        | -0.392 | 0.012  | -0.092 | -0.169 | -0.073 | 2.42E-06 |
| MAD2L2      | -0.104 | -0.023 | -0.104 | 0.129  | -0.414 | 2.42E-06 |
| LETMD1      | -0.444 | 0.023  | 0.173  | -0.188 | -0.07  | 2.43E-06 |
| AP006621.5  | -0.606 | -0.027 | 0.257  | -0.466 | -0.051 | 2.44E-06 |
| PAK2        | 0.31   | 0.172  | 0.039  | 0.292  | 0.512  | 2.46E-06 |
| DNAJB9      | 0.113  | 0.006  | 0.224  | -0.171 | -0.387 | 2.47E-06 |
| OCIAD1      | 0.11   | 0.073  | 0.098  | 0.252  | 0.345  | 2.48E-06 |
| ARL8A       | 0.341  | 0.168  | -0.028 | 0.122  | 0.295  | 2.48E-06 |
| GABPB2      | 0.417  | 0.091  | 0.213  | 0.442  | -0.002 | 2.48E-06 |
| AP3M2       | -0.246 | -0.342 | -0.252 | -0.593 | -0.295 | 2.49E-06 |
| ZDHHC8      | -0.32  | -0.152 | -0.01  | -0.341 | -0.01  | 2.50E-06 |
| EXD3        | -0.47  | -0.163 | 0.104  | -0.155 | 0.188  | 2.52E-06 |
| AC010878.3  | 0.158  | -0.156 | -0.151 | 0.016  | -0.463 | 2.52E-06 |
| SLC9A3R1    | 0.203  | 0.179  | 0.083  | 0.453  | 0.556  | 2.53E-06 |
| PSMD12P     | 0.375  | -0.066 | -0.123 | 0.247  | -0.404 | 2.53E-06 |
| TIMM9       | -0.54  | -0.269 | -0.094 | -0.356 | -0.523 | 2.53E-06 |
| ACHE        | 0.23   | 0.719  | 0.408  | 0.29   | 1.071  | 2.55E-06 |
| PIK3C3      | 0.265  | 0.238  | 0.087  | 0.302  | 0.428  | 2.55E-06 |
| RPP40       | 0.103  | -0.154 | -0.239 | 0.014  | -0.41  | 2.56E-06 |
| RNF220      | 0.326  | -0.052 | -0.059 | 0.166  | 0.114  | 2.58E-06 |
| PYGO2       | -0.252 | -0.07  | -0.049 | -0.246 | -0.439 | 2.58E-06 |
| ZFAS1       | -0.315 | -0.156 | -0.047 | -0.712 | -0.635 | 2.58E-06 |
| GABRE       | -0.292 | 0.103  | 0.22   | -0.771 | 0.023  | 2.59E-06 |
| FAM3C       | 0.334  | 0.149  | -0.012 | 0.179  | 0.194  | 2.63E-06 |
| CTD-2622113 | -0.748 | -0.153 | -0.168 | -1.249 | -1.042 | 2.63E-06 |
| SMIM3       | 0.065  | -0.071 | -0.137 | -0.143 | 0.751  | 2.64E-06 |
| SNRNP25     | -0.23  | -0.169 | -0.163 | -0.114 | -0.391 | 2.64E-06 |
| MSX2        | 0.947  | 0.455  | 0.065  | 0.358  | 0.437  | 2.67E-06 |
| RP11-550F7  | 0.464  | -0.028 | -0.089 | 0.355  | 0.413  | 2.67E-06 |
| AKAP9       | -0.333 | 0.098  | 0.139  | -0.293 | 0.108  | 2.69E-06 |
| RSL1D1      | 0.242  | 0.066  | 0.024  | 0.343  | 0.374  | 2.70E-06 |
| STIM1       | 0.016  | 0.031  | 0.087  | 0.319  | 0.418  | 2.72E-06 |
| DHX32       | 0.081  | 0.269  | 0.073  | 0.327  | 0.318  | 2.73E-06 |
| MRPS12      | -0.12  | -0.23  | -0.265 | -0.122 | -0.394 | 2.73E-06 |
| C3orf14     | -0.267 | 0.019  | 0.058  | -0.292 | -0.659 | 2.73E-06 |

|             |        |        |        |        |        |          |
|-------------|--------|--------|--------|--------|--------|----------|
| ZNF141      | -0.191 | -0.05  | -0.18  | -0.83  | -0.276 | 2.74E-06 |
| LYAR        | 0.142  | 0.018  | -0.118 | 0.133  | -0.34  | 2.74E-06 |
| ACTN4       | 0.275  | 0.092  | 0.018  | 0.416  | 0.655  | 2.75E-06 |
| DLD         | 0.26   | 0.204  | 0.098  | 0.488  | 0.284  | 2.75E-06 |
| GNAI3       | 0.343  | 0.072  | 0.026  | 0.361  | 0.183  | 2.75E-06 |
| PRPF38A     | 0.04   | -0.025 | -0.056 | 0.004  | -0.351 | 2.75E-06 |
| SNORD4A     | -0.374 | -0.019 | -0.042 | -1.045 | -1.071 | 2.76E-06 |
| GYPC        | -0.309 | -0.161 | -0.035 | 0.044  | 0.968  | 2.77E-06 |
| SNORA44     | 0.068  | 0.099  | 0.15   | -0.911 | -0.769 | 2.77E-06 |
| GATAD2B     | 0.342  | 0.113  | 0.147  | 0.164  | 0.402  | 2.79E-06 |
| ENOX2       | 0.132  | 0.006  | 0.183  | 0.441  | 0.218  | 2.79E-06 |
| HSPB11      | -0.374 | 0.008  | 0.005  | -0.493 | -0.645 | 2.79E-06 |
| TBL2        | -0.125 | -0.254 | -0.268 | -0.178 | -0.368 | 2.80E-06 |
| RP11-453E1  | -0.153 | 0.135  | 0.327  | 0.238  | -0.101 | 2.81E-06 |
| LSM8        | -0.209 | -0.099 | -0.099 | -0.549 | -0.55  | 2.81E-06 |
| JADE3       | 0.404  | 0.175  | 0.079  | 0.225  | 0.414  | 2.82E-06 |
| ZNF432      | -0.076 | 0.229  | 0.21   | -0.539 | -0.169 | 2.85E-06 |
| AC093726.6  | -0.489 | -0.348 | 0.018  | 0.03   | 0.158  | 2.88E-06 |
| TGFBI       | 0.451  | 0.111  | -0.171 | 0.247  | 0.048  | 2.89E-06 |
| SNORD50B    | -0.042 | 0.154  | 0.029  | -0.776 | -0.869 | 2.90E-06 |
| RP13-1032I1 | -0.203 | -0.427 | -0.498 | -0.814 | -1.096 | 2.92E-06 |
| THNSL1      | -0.083 | 0.014  | 0.454  | 0.419  | 0.507  | 2.93E-06 |
| RAB7A       | 0.421  | 0.161  | -0.007 | 0.378  | 0.417  | 2.93E-06 |
| PTCH1       | -0.44  | -0.52  | -0.453 | -0.364 | -0.055 | 2.93E-06 |
| NEAT1       | -0.522 | 0.314  | 0.095  | -0.802 | -0.096 | 2.93E-06 |
| CANX        | 0.35   | 0.106  | -0.05  | 0.249  | -0.127 | 2.93E-06 |
| TBX1        | -0.235 | -0.428 | -0.127 | -0.399 | -0.429 | 2.93E-06 |
| PLEKHM3     | 0.556  | 0.401  | 0.215  | 0.25   | 0.274  | 2.94E-06 |
| EHD2        | 0.326  | 0.089  | 0.08   | 0.563  | 0.679  | 2.95E-06 |
| FOXM1       | -0.208 | -0.315 | -0.334 | -0.037 | -0.388 | 2.97E-06 |
| HCLS1       | 0.413  | 0.12   | 0.015  | 0.406  | 0.56   | 2.98E-06 |
| RP11-257O5  | -0.369 | 0.026  | 0.158  | -0.72  | -0.423 | 2.98E-06 |
| LRRCC1      | 0.031  | -0.043 | -0.161 | -0.057 | -0.655 | 2.99E-06 |
| RP1-239B22  | 0.513  | 0.203  | 0.212  | -0.1   | -0.248 | 3.00E-06 |
| FUT4        | 0.039  | 0.108  | 0.097  | 0.114  | 0.512  | 3.01E-06 |
| AC010129.1  | 0.36   | -0.026 | -0.17  | 0.178  | -0.015 | 3.02E-06 |
| DDX43       | 0.313  | 0.019  | 0.414  | 0.22   | 0.993  | 3.04E-06 |
| IER3IP1     | -0.037 | -0.043 | -0.141 | -0.357 | -0.474 | 3.04E-06 |

|              |        |        |        |        |        |          |
|--------------|--------|--------|--------|--------|--------|----------|
| RP11-20123.1 | -0.397 | -0.204 | -0.053 | -1.072 | -0.768 | 3.04E-06 |
| CTD-2002H8   | 0.003  | 0.589  | 0.497  | -0.693 | -0.507 | 3.06E-06 |
| APTX         | -0.063 | 0.036  | -0.006 | -0.033 | -0.325 | 3.07E-06 |
| ATP6V0D1     | 0.332  | 0.097  | -0.013 | 0.45   | 0.433  | 3.08E-06 |
| SRD5A1       | 0.033  | -0.03  | 0.044  | -0.407 | 0.082  | 3.10E-06 |
| AC009948.5   | -0.665 | -0.305 | -0.044 | -0.221 | -0.237 | 3.11E-06 |
| OSTC         | -0.253 | -0.173 | -0.18  | -0.588 | -0.685 | 3.11E-06 |
| KIFAP3       | 0.302  | 0.135  | 0.071  | 0.52   | 0.573  | 3.13E-06 |
| RP11-553A1   | 0.495  | 0.86   | 0.945  | 1.158  | 0.996  | 3.18E-06 |
| POLR3E       | -0.342 | -0.05  | -0.013 | -0.09  | -0.258 | 3.18E-06 |
| BACE1        | 0.208  | 0.065  | 0.029  | 0.133  | 0.364  | 3.21E-06 |
| RNF26        | -0.16  | -0.415 | -0.467 | -0.012 | -0.162 | 3.21E-06 |
| SLC2A13      | 0.012  | 0.171  | -0.243 | -0.452 | -0.471 | 3.23E-06 |
| LIPE         | -0.515 | -0.46  | -0.603 | -0.452 | -0.825 | 3.24E-06 |
| MAPK8IP1     | 0.246  | 0.24   | 0.189  | 0.495  | 1.03   | 3.27E-06 |
| COQ7         | 0.163  | -0.036 | 0.033  | -0.005 | -0.334 | 3.27E-06 |
| PTGER1       | -0.342 | -0.301 | -0.412 | -0.252 | 0.729  | 3.28E-06 |
| AC008746.1   | -0.338 | 0.31   | 0.429  | -0.474 | -0.574 | 3.28E-06 |
| PMVK         | 0.109  | -0.002 | 0.011  | 0.371  | -0.052 | 3.29E-06 |
| HDAC10       | -0.531 | -0.188 | -0.062 | -0.705 | -0.43  | 3.29E-06 |
| RP11-325K4   | -0.563 | -0.056 | -0.038 | -1.153 | -0.825 | 3.29E-06 |
| CHPF         | 0.274  | 0.126  | -0.14  | -0.046 | -1.057 | 3.31E-06 |
| BRWD1        | 0.121  | 0.323  | 0.282  | -0.079 | 0.186  | 3.33E-06 |
| ZNF503       | 0.565  | 0.06   | -0.017 | 0.127  | 0.54   | 3.34E-06 |
| RANBP9       | 0.413  | 0.125  | -0.107 | 0.075  | 0.001  | 3.34E-06 |
| RP11-384M2   | -0.952 | 0.04   | -0.124 | -0.747 | -0.941 | 3.34E-06 |
| SEMA6C       | -0.232 | -0.166 | -0.237 | -0.504 | -0.407 | 3.35E-06 |
| FAM175A      | 0.031  | 0.206  | 0.367  | 0.36   | 0.179  | 3.36E-06 |
| RP11-380M2   | -0.026 | -0.286 | 0.326  | -0.817 | -1.102 | 3.36E-06 |
| PPP1R2       | 0.357  | 0.25   | 0.07   | 0.186  | 0.12   | 3.37E-06 |
| RP11-469O1   | 0.305  | 0.067  | 0.128  | 0.575  | 0.656  | 3.38E-06 |
| ISG15        | 0.089  | -0.046 | 0.038  | 0.302  | 0.469  | 3.38E-06 |
| PSMC4        | 0.387  | 0.199  | 0.018  | 0.357  | -0.063 | 3.38E-06 |
| EXOC6B       | 0.474  | 0.184  | 0.226  | 0.546  | 0.326  | 3.41E-06 |
| SLC35F6      | -0.044 | -0.115 | -0.236 | -0.016 | -0.364 | 3.41E-06 |
| GEMIN7       | -0.355 | -0.216 | -0.108 | -0.344 | -0.604 | 3.41E-06 |
| RP4-667H12   | 0.208  | 0.107  | 0.08   | 0.505  | 0.676  | 3.42E-06 |
| OTUD1        | 0.207  | 0.299  | -0.136 | 0.132  | 0.797  | 3.43E-06 |

|             |        |        |        |        |        |          |
|-------------|--------|--------|--------|--------|--------|----------|
| MVB12B      | 0.38   | 0.185  | 0.036  | 0.376  | 0.552  | 3.47E-06 |
| RP13-147D1  | 0.21   | -0.415 | -0.058 | 0.256  | 0.256  | 3.48E-06 |
| TBRG4       | -0.182 | -0.069 | -0.015 | 0.015  | -0.331 | 3.50E-06 |
| THRA        | 0.059  | -0.013 | 0.107  | 0.45   | 0.404  | 3.51E-06 |
| PCCA        | 0.187  | 0.005  | 0.133  | 0.229  | 0.484  | 3.54E-06 |
| RP3-508I15  | -0.022 | -0.022 | 0.477  | -0.867 | -0.819 | 3.54E-06 |
| RP5-1086K1  | -0.439 | -0.132 | -0.078 | -1.066 | -0.925 | 3.54E-06 |
| IFITM1      | 0.1    | -0.065 | -0.128 | 0.281  | 0.743  | 3.56E-06 |
| THTPA       | -0.465 | 0.145  | 0.356  | -0.111 | 0.067  | 3.57E-06 |
| RBMS2P1     | 0.065  | 0.025  | 0.25   | 0.448  | 0.33   | 3.60E-06 |
| RP11-295P9  | -0.462 | 0.195  | -0.139 | -0.739 | -0.507 | 3.62E-06 |
| TSEN2       | -0.588 | -0.259 | 0.116  | -0.087 | -0.242 | 3.63E-06 |
| RPA3        | -0.329 | -0.052 | 0.05   | -0.456 | -0.692 | 3.63E-06 |
| EGFL8       | -0.569 | -0.019 | 0.06   | -0.731 | -0.905 | 3.63E-06 |
| DNAJC24     | -0.218 | 0.047  | 0.088  | -0.302 | -0.554 | 3.64E-06 |
| AC079922.3  | -0.583 | 0.159  | 0.585  | -0.059 | -0.202 | 3.67E-06 |
| RAB6A       | 0.287  | 0.131  | 0.037  | 0.268  | 0.417  | 3.69E-06 |
| RP11-672A2  | -0.675 | 0.179  | 0.805  | 0.191  | 0.292  | 3.70E-06 |
| SNTB2       | 0.03   | -0.196 | -0.327 | -0.277 | -0.053 | 3.71E-06 |
| NDUFS1      | 0.256  | 0.032  | 0.036  | 0.407  | 0.276  | 3.72E-06 |
| CAMSAP2     | 0.384  | 0.137  | 0.025  | 0.084  | 0.125  | 3.72E-06 |
| SEC22B      | 0.328  | 0.154  | 0.024  | 0.091  | 0.118  | 3.73E-06 |
| MAP2K1P1    | 0.415  | 0.011  | -0.104 | 0.493  | 0.44   | 3.75E-06 |
| FES         | -0.455 | -0.125 | -0.098 | -0.176 | -0.128 | 3.75E-06 |
| GPR4        | 0.086  | -0.235 | 0.001  | 0.33   | -0.151 | 3.75E-06 |
| CNTN3       | 0.203  | -0.051 | -0.377 | -0.408 | -0.673 | 3.78E-06 |
| GALNT2      | 0.257  | 0.068  | -0.051 | 0.366  | 0.436  | 3.83E-06 |
| CECR1       | 0.288  | 0.089  | -0.032 | 0.297  | 0.384  | 3.83E-06 |
| ME1         | 0.256  | 0.364  | 0.201  | 0.481  | 0.284  | 3.87E-06 |
| UBR3        | 0.206  | 0.426  | 0.116  | 0.152  | -0.069 | 3.89E-06 |
| RP11-75A9.2 | 0.292  | -0.098 | -0.005 | 0.448  | 0.339  | 3.90E-06 |
| AMER1       | 0.097  | 0.295  | 0.135  | -0.503 | 0.002  | 3.90E-06 |
| HACL1       | 0.084  | 0.036  | 0.051  | 0.479  | 0.34   | 3.93E-06 |
| FNDC3A      | 0.354  | 0.048  | -0.082 | 0.085  | 0.144  | 4.00E-06 |
| MSS51       | -0.196 | -0.2   | 0.417  | -0.668 | -0.676 | 4.00E-06 |
| RP11-484D5  | 0.193  | -0.245 | -0.396 | -0.084 | 0.182  | 4.03E-06 |
| C1QTNF12    | -0.093 | -0.205 | 0.414  | -0.335 | -1.044 | 4.04E-06 |
| CD74        | -0.221 | 0.341  | 0.209  | 0.463  | 1.145  | 4.05E-06 |

|             |        |        |        |        |        |          |
|-------------|--------|--------|--------|--------|--------|----------|
| TSG101      | 0.227  | 0.074  | 0.135  | 0.395  | 0.253  | 4.07E-06 |
| PCM1        | 0.083  | 0.161  | 0.125  | 0.389  | 0.444  | 4.13E-06 |
| C9orf47     | -0.715 | 0.277  | 0.203  | -0.721 | -0.204 | 4.13E-06 |
| ASB7        | 0.446  | 0.326  | 0.071  | 0.241  | 0.303  | 4.16E-06 |
| CEP135      | 0.023  | -0.159 | 0.086  | -0.044 | -0.374 | 4.17E-06 |
| ANO2        | -0.063 | -0.422 | -0.376 | -0.386 | 0.344  | 4.18E-06 |
| GLTSCR1L    | 0.308  | -0.046 | 0.268  | 0.389  | 0.11   | 4.18E-06 |
| MNT         | 0.246  | 0.351  | 0.453  | 0.276  | 0.537  | 4.22E-06 |
| AC011753.3  | -0.515 | -0.374 | -0.211 | -0.465 | -0.705 | 4.23E-06 |
| MRC2        | 0.209  | -0.024 | -0.099 | 0.194  | 0.42   | 4.24E-06 |
| ABHD11      | -0.146 | -0.128 | -0.128 | -0.127 | -0.531 | 4.25E-06 |
| DIP2C       | 0.159  | -0.11  | -0.263 | -0.315 | 0.382  | 4.27E-06 |
| ANO7        | 0.013  | -0.001 | -0.292 | -0.305 | 0.711  | 4.30E-06 |
| HSBP1L1     | -0.645 | -0.326 | -0.162 | -0.609 | 0.263  | 4.31E-06 |
| RP11-169K1  | -0.302 | 0.112  | -0.401 | -0.39  | -0.795 | 4.35E-06 |
| CTD-2621I17 | -0.596 | 0.292  | 0.035  | -0.781 | -0.714 | 4.46E-06 |
| PANK1       | 0.562  | 0.189  | -0.178 | -0.263 | 0.511  | 4.51E-06 |
| EGFR        | 0.521  | 0.419  | 0.323  | 0.241  | 0.365  | 4.52E-06 |
| HOXB5       | -0.621 | -0.401 | -0.129 | -0.726 | -0.034 | 4.52E-06 |
| TCAF2       | -0.043 | 0.182  | -0.031 | -0.055 | -0.43  | 4.52E-06 |
| CTD-2547G2  | -0.664 | -0.075 | 0.022  | -0.937 | -0.846 | 4.52E-06 |
| PSMC1       | 0.257  | 0.219  | 0.061  | 0.092  | -0.336 | 4.57E-06 |
| RANGRF      | -0.148 | -0.17  | -0.255 | -0.229 | -0.464 | 4.59E-06 |
| H2AFZ       | -0.291 | -0.192 | -0.109 | -0.221 | -0.552 | 4.60E-06 |
| SNORD58C    | -0.518 | 0.042  | -0.059 | -0.998 | -0.906 | 4.60E-06 |
| RP11-152N1  | -0.552 | -0.133 | -0.205 | -0.53  | -1.173 | 4.62E-06 |
| PPP2R5D     | 0.024  | -0.1   | -0.116 | 0.292  | 0.323  | 4.64E-06 |
| ZNF470      | -0.367 | 0.291  | 0.36   | 0.114  | 0.361  | 4.65E-06 |
| SNORD45C    | -0.159 | 0.196  | 0.244  | -0.693 | -0.92  | 4.65E-06 |
| TOMM5       | -0.367 | -0.196 | -0.145 | -0.558 | -0.734 | 4.66E-06 |
| TPRKB       | -0.434 | -0.141 | -0.113 | -0.49  | -0.794 | 4.66E-06 |
| PAFAH1B2    | 0.235  | -0.021 | 0.019  | 0.305  | 0.35   | 4.77E-06 |
| HEXDC       | -0.331 | 0.239  | 0.356  | -0.167 | 0.01   | 4.77E-06 |
| MIR1914     | -0.836 | -0.378 | -0.529 | -1.165 | -0.935 | 4.79E-06 |
| FUBP3       | 0.395  | 0.054  | -0.076 | 0.129  | 0.119  | 4.81E-06 |
| SNORA48     | -0.178 | 0.089  | 0.044  | -0.849 | -0.788 | 4.82E-06 |
| ANXA2P1     | 0.124  | -0.199 | -0.141 | 0.44   | 0.397  | 4.85E-06 |
| YME1L1      | 0.343  | 0.195  | 0.063  | 0.35   | 0.301  | 4.85E-06 |



|             |        |        |        |        |        |          |
|-------------|--------|--------|--------|--------|--------|----------|
| ALKBH8      | 0.345  | 0.04   | 0.039  | 0.257  | -0.232 | 4.85E-06 |
| ATP8B3      | -0.938 | -0.566 | -0.295 | -0.579 | -0.684 | 4.85E-06 |
| CTD-2195M1  | 0.34   | -0.184 | -0.214 | 0.243  | 0.314  | 4.89E-06 |
| RP11-169K1  | -0.243 | -0.317 | -0.216 | -0.495 | -0.437 | 4.97E-06 |
| TMEM107     | -0.387 | -0.112 | 0.192  | 0.001  | -0.27  | 4.99E-06 |
| TXNIP       | -0.362 | -0.073 | -0.579 | -0.336 | -0.058 | 5.03E-06 |
| RP4-583P15  | -0.246 | 0.038  | 0.203  | -0.746 | -0.427 | 5.04E-06 |
| RP11-320N7  | -0.289 | -0.335 | -0.096 | 0.178  | -0.108 | 5.07E-06 |
| DNAJC18     | 0.019  | 0.184  | 0.598  | -0.053 | 0.279  | 5.10E-06 |
| RRAGC       | 0.203  | 0.208  | 0.055  | 0.382  | 0.425  | 5.11E-06 |
| SNORA4      | -0.329 | 0.214  | -0.082 | -0.739 | -0.999 | 5.11E-06 |
| B3GALNT1    | -0.152 | -0.375 | -0.407 | -0.282 | -0.289 | 5.13E-06 |
| LIX1L       | 0.097  | -0.006 | -0.007 | 0.337  | 0.237  | 5.16E-06 |
| RP4-758J18. | -0.341 | -0.003 | 0.011  | -0.06  | -0.357 | 5.16E-06 |
| RP11-1246C  | -0.202 | -0.272 | 0.473  | 0.022  | 0.762  | 5.20E-06 |
| DNAJC21     | 0.318  | 0.348  | 0.229  | 0.3    | 0.349  | 5.23E-06 |
| NPC1        | 0.261  | 0.158  | 0      | 0.064  | 0.43   | 5.24E-06 |
| PPIL3       | -0.18  | -0.198 | -0.016 | -0.15  | -0.671 | 5.24E-06 |
| MTMR11      | -0.314 | 0.097  | 0.326  | -0.165 | 0.09   | 5.26E-06 |
| PGDP1       | 0.374  | 0.047  | 0.004  | 0.472  | 0.652  | 5.27E-06 |
| GLI3        | -0.146 | -0.149 | 0.073  | 0.171  | 0.345  | 5.28E-06 |
| RP11-81G24  | 0.134  | 0.161  | -0.257 | -0.283 | -0.493 | 5.32E-06 |
| DGAT1       | -0.372 | -0.161 | -0.124 | -0.327 | -0.07  | 5.33E-06 |
| CCDC36      | -0.794 | -0.557 | -0.23  | -0.391 | -0.396 | 5.37E-06 |
| RP11-806L2. | -0.128 | 0.524  | 0.734  | 0.565  | 0.896  | 5.43E-06 |
| RNF166      | -0.203 | -0.268 | -0.121 | -0.303 | -0.338 | 5.43E-06 |
| RP11-83A24  | -0.929 | -0.187 | 0.249  | -0.045 | 0.067  | 5.44E-06 |
| DEDD2       | -0.099 | 0.306  | 0.11   | 0.042  | 0.323  | 5.50E-06 |
| KLF10       | -0.346 | 0.178  | 0.148  | 0.182  | 0.357  | 5.51E-06 |
| HAX1        | -0.115 | -0.145 | -0.084 | -0.101 | -0.398 | 5.51E-06 |
| ARL16       | -0.255 | -0.137 | -0.108 | -0.475 | -0.432 | 5.51E-06 |
| APOBEC3F    | -0.416 | -0.03  | 0.474  | 0.444  | 0.597  | 5.57E-06 |
| TOP1MT      | 0.189  | 0.129  | 0.175  | 0.387  | 0.576  | 5.59E-06 |
| VAC14       | 0.176  | 0.021  | 0.003  | 0.393  | 0.333  | 5.60E-06 |
| DHRS11      | -0.076 | -0.112 | -0.326 | -0.466 | -0.591 | 5.60E-06 |
| ABCA2       | -0.026 | 0.1    | 0.201  | 0.002  | 0.343  | 5.61E-06 |
| CSPP1       | -0.384 | -0.222 | -0.238 | -0.504 | -0.589 | 5.63E-06 |
| DCAF6       | 0.355  | 0.131  | -0.015 | 0.263  | 0.425  | 5.66E-06 |

|             |        |        |        |        |        |          |
|-------------|--------|--------|--------|--------|--------|----------|
| RP1-273G13  | -0.06  | -0.314 | -0.345 | -0.519 | -1.012 | 5.66E-06 |
| ZMYND11     | 0.338  | 0.069  | -0.077 | 0.092  | 0.27   | 5.71E-06 |
| RP13-554M1  | -0.335 | 0.123  | 0.095  | -0.835 | -0.267 | 5.72E-06 |
| ROCK1       | 0.162  | 0.181  | 0.129  | 0.307  | 0.445  | 5.73E-06 |
| YWHAH       | 0.266  | -0.019 | -0.001 | 0.387  | 0.302  | 5.75E-06 |
| TRAPPC9     | 0.391  | 0.021  | -0.063 | 0.371  | 0.504  | 5.77E-06 |
| TBX3        | 0.527  | 0.109  | 0.25   | 0.082  | 0.413  | 5.79E-06 |
| PDLIM3      | 0.439  | 0.169  | 0.16   | 0.394  | 0.5    | 5.81E-06 |
| PEPD        | 0.274  | 0.052  | -0.038 | 0.317  | 0.462  | 5.81E-06 |
| PSMF1       | 0.278  | 0.08   | 0.024  | 0.441  | 0.387  | 5.82E-06 |
| RP11-51F16  | -0.083 | -0.189 | -0.001 | 0.14   | 0.669  | 5.84E-06 |
| SMPD4       | 0.029  | -0.047 | -0.08  | 0.009  | -0.342 | 5.84E-06 |
| AGFG2       | -0.472 | -0.323 | -0.075 | 0.056  | 0.13   | 5.85E-06 |
| DDX50       | 0.124  | 0.216  | 0.142  | 0.381  | 0.102  | 5.85E-06 |
| RPS19BP1    | -0.035 | -0.202 | -0.265 | -0.173 | -0.359 | 5.87E-06 |
| AC142391.3  | -0.024 | 0.403  | 0.975  | -0.068 | 0.104  | 5.88E-06 |
| MDH2        | 0.336  | 0.125  | 0.024  | 0.478  | 0.399  | 5.95E-06 |
| RIMKLB      | -0.11  | -0.107 | 0.068  | -0.538 | -0.377 | 5.99E-06 |
| SNRPN       | 0.063  | 0.075  | 0.091  | 0.249  | 0.394  | 6.03E-06 |
| RPF2        | -0.107 | -0.074 | -0.187 | -0.107 | -0.455 | 6.04E-06 |
| ZNF441      | 0.015  | 0.175  | 0.1    | -0.419 | -0.365 | 6.07E-06 |
| LONRF3      | 0.734  | -0.021 | 0.139  | -0.031 | -0.364 | 6.09E-06 |
| MRPL27      | -0.03  | -0.077 | 0.017  | -0.016 | -0.367 | 6.10E-06 |
| GPR180      | -0.5   | -0.333 | -0.18  | -0.467 | -0.312 | 6.11E-06 |
| IRGQ        | 0.146  | 0.33   | 0.223  | 0.061  | 0.346  | 6.12E-06 |
| DCTN6       | -0.057 | -0.089 | -0.108 | -0.312 | -0.434 | 6.14E-06 |
| RNF152      | 0.329  | 0.166  | 0.343  | 0.485  | 0.37   | 6.18E-06 |
| SNORA21B    | -0.413 | 0.126  | -0.069 | -0.772 | -1.2   | 6.19E-06 |
| RPL36A      | -0.027 | 0.032  | 0.035  | -0.397 | -0.555 | 6.20E-06 |
| WDR47       | 0.263  | 0.206  | 0.079  | 0.12   | 0.364  | 6.24E-06 |
| PRR7        | -0.41  | -0.441 | -0.074 | -0.13  | 0.36   | 6.25E-06 |
| PUDP        | 0.093  | 0.022  | 0.091  | 0.371  | 0.355  | 6.27E-06 |
| KB-1732A1.1 | 0.647  | 0.037  | 0.414  | 0.799  | 0.687  | 6.32E-06 |
| MAMLD1      | 0.023  | -0.367 | -0.048 | 0.107  | 0.434  | 6.32E-06 |
| DHX15       | 0.326  | 0.1    | -0.053 | 0.159  | -0.06  | 6.32E-06 |
| INE1        | -0.325 | -0.032 | -0.053 | -0.994 | -0.683 | 6.32E-06 |
| MOAP1       | 0.232  | 0.141  | 0.061  | 0.282  | 0.405  | 6.35E-06 |
| HES7        | -1.101 | -0.168 | -0.253 | -0.546 | 0.105  | 6.35E-06 |

|             |        |        |        |        |        |          |
|-------------|--------|--------|--------|--------|--------|----------|
| CAPN15      | -0.214 | -0.117 | -0.164 | -0.442 | -0.342 | 6.36E-06 |
| RAB24       | -0.418 | -0.085 | 0.018  | -0.26  | -0.329 | 6.37E-06 |
| RNASE1      | 0.009  | -0.215 | -0.328 | 0.206  | 0.147  | 6.38E-06 |
| RNASEH2C    | -0.254 | -0.093 | -0.148 | -0.401 | -0.529 | 6.39E-06 |
| SYNCRIP     | 0.431  | 0.056  | -0.057 | 0.256  | 0.156  | 6.41E-06 |
| SNORA24     | -0.268 | -0.187 | -0.205 | -0.724 | -1.318 | 6.44E-06 |
| TMEM234     | -0.496 | -0.196 | -0.007 | -0.128 | 0.022  | 6.48E-06 |
| EEF1DP1     | 0.214  | -0.008 | 0.075  | 0.308  | 0.404  | 6.49E-06 |
| IVNS1ABP    | -0.348 | -0.216 | -0.045 | -0.329 | -0.027 | 6.55E-06 |
| NEK8        | -0.029 | 0.236  | 0.313  | -0.146 | -0.331 | 6.59E-06 |
| OXSM        | -0.624 | -0.151 | -0.113 | -0.422 | -0.59  | 6.59E-06 |
| RP11-1033A  | 0.354  | -0.016 | 0.015  | 0.458  | 0.472  | 6.69E-06 |
| LMNB1       | 0.159  | -0.249 | -0.389 | 0.061  | -0.465 | 6.69E-06 |
| HOXB-AS1    | -0.667 | -0.136 | 0.147  | -0.896 | -0.607 | 6.73E-06 |
| ATAD3A      | 0.112  | -0.02  | -0.194 | -0.192 | -0.381 | 6.74E-06 |
| SNORD27     | 0.289  | 0.207  | 0.117  | -0.585 | -0.87  | 6.75E-06 |
| SNIP1       | 0.439  | 0.225  | 0.142  | 0.392  | 0.37   | 6.76E-06 |
| FSD1L       | 0.245  | 0.032  | 0.177  | -0.582 | -0.353 | 6.76E-06 |
| HNRNPA1L2   | 0.268  | 0.323  | 0.288  | 0.512  | 0.214  | 6.77E-06 |
| HELQ        | -0.192 | 0.106  | 0.027  | -0.039 | -0.481 | 6.79E-06 |
| TEFM        | -0.387 | -0.185 | -0.085 | -0.259 | -0.629 | 6.79E-06 |
| CCSAP       | -0.184 | -0.377 | -0.568 | -0.242 | -0.164 | 6.81E-06 |
| LRRC37A2    | -0.097 | 0.098  | 0.179  | -0.567 | -0.193 | 6.81E-06 |
| UQCRC2      | 0.242  | 0.151  | 0.121  | 0.333  | 0.301  | 6.82E-06 |
| RP3-344J20. | 0.123  | -0.151 | -0.18  | 0.379  | 0.58   | 6.85E-06 |
| HSF4        | -0.403 | 0.014  | 0.306  | -0.654 | -0.423 | 6.93E-06 |
| LYPLA2      | 0.202  | 0.137  | 0.183  | 0.325  | 0.479  | 7.00E-06 |
| FBXO7       | 0.251  | 0.075  | -0.033 | 0.327  | 0.327  | 7.01E-06 |
| EPM2A       | 0.309  | -0.079 | -0.327 | -0.251 | -0.061 | 7.01E-06 |
| ING3        | -0.113 | -0.085 | -0.219 | -0.303 | -0.443 | 7.02E-06 |
| NPIPP1      | -0.338 | -0.123 | -0.347 | -0.914 | -0.521 | 7.02E-06 |
| YWHAZP2     | 0.343  | 0.042  | -0.153 | 0.262  | 0.184  | 7.03E-06 |
| SNORD100    | -0.33  | 0.275  | 0.058  | -0.874 | -0.894 | 7.05E-06 |
| MAEA        | 0.154  | 0.12   | 0.103  | 0.374  | 0.38   | 7.07E-06 |
| F3          | 0.01   | 0.523  | -0.124 | -0.524 | -0.528 | 7.08E-06 |
| PSMD5       | 0.225  | 0.049  | 0      | 0.386  | 0.294  | 7.09E-06 |
| GDPD1       | -0.95  | 0.164  | -0.018 | -0.328 | -0.029 | 7.16E-06 |
| MYO1C       | 0.485  | -0.047 | -0.182 | 0.077  | 0.023  | 7.29E-06 |

|            |        |        |        |        |        |          |
|------------|--------|--------|--------|--------|--------|----------|
| SCN1B      | -0.217 | -0.367 | -0.08  | -0.194 | 0.175  | 7.31E-06 |
| BORCS8     | -0.28  | -0.097 | -0.004 | -0.051 | -0.375 | 7.48E-06 |
| KCNK1      | 0.122  | 0.153  | 0.198  | 0.191  | 0.859  | 7.50E-06 |
| LINC00472  | -0.552 | -0.234 | -0.301 | -0.888 | -0.902 | 7.55E-06 |
| BDH2P1     | -0.149 | -0.111 | -0.056 | 0.051  | 0.475  | 7.59E-06 |
| ALG1       | 0.019  | -0.026 | -0.148 | 0.08   | -0.328 | 7.60E-06 |
| EPHX1      | 0.224  | 0.181  | 0.013  | 0.398  | -0.22  | 7.65E-06 |
| YEATS4     | -0.159 | -0.152 | -0.129 | -0.337 | -0.723 | 7.68E-06 |
| C9orf64    | 0.259  | 0.043  | 0.095  | 0.536  | 0.45   | 7.72E-06 |
| FNBP1      | 0.08   | 0.124  | 0.138  | 0.455  | 0.454  | 7.73E-06 |
| RTFDC1     | 0.277  | 0.091  | -0.02  | 0.36   | 0.175  | 7.74E-06 |
| RP11-54D18 | 0.401  | -0.078 | -0.025 | 0.389  | 0.345  | 7.79E-06 |
| G3BP2      | 0.371  | 0.125  | -0.057 | 0.308  | 0.391  | 7.83E-06 |
| ACOX1      | 0.383  | 0.216  | 0.09   | 0.215  | 0.241  | 7.85E-06 |
| ACP7       | 0.224  | 0.07   | 0.132  | 0.613  | 0.623  | 7.95E-06 |
| RP11-385E5 | 0.153  | -0.183 | -0.278 | -0.025 | -0.489 | 7.96E-06 |
| SH2D4A     | 0.62   | -0.219 | 0.028  | 0.414  | 0.928  | 8.02E-06 |
| PCDHGB4    | 0.285  | 0.217  | -0.012 | 0.275  | 0.816  | 8.02E-06 |
| PTPRCAP    | -0.782 | 0.156  | 0.065  | -0.747 | -0.689 | 8.02E-06 |
| RP5-1148A2 | 0.764  | 0.98   | 1.033  | 1.212  | 1.334  | 8.04E-06 |
| DCLRE1C    | -0.526 | -0.092 | -0.01  | -0.181 | -0.469 | 8.04E-06 |
| VEGFA      | -0.115 | 0.025  | 0.169  | -0.499 | -0.143 | 8.09E-06 |
| PDLIM5     | 0.427  | 0.097  | -0.234 | -0.079 | -0.098 | 8.12E-06 |
| NRIP3      | 0.256  | 0.317  | 0.22   | 0.275  | 0.498  | 8.15E-06 |
| HNRNPK     | 0.445  | 0.135  | -0.016 | 0.36   | 0.381  | 8.17E-06 |
| C1orf131   | -0.131 | -0.135 | -0.18  | -0.16  | -0.515 | 8.17E-06 |
| GFPT1      | 0.516  | 0.146  | 0.073  | 0.325  | 0.348  | 8.19E-06 |
| RHPN2      | 0.632  | 0.341  | 0.069  | 0.052  | 0.521  | 8.22E-06 |
| RP1-267D11 | -0.186 | -0.194 | -0.182 | -0.43  | -0.899 | 8.22E-06 |
| STARD3NL   | -0.142 | -0.146 | -0.223 | -0.437 | -0.45  | 8.23E-06 |
| DVL2       | -0.086 | -0.039 | -0.21  | -0.234 | -0.385 | 8.36E-06 |
| ADAM10     | 0.35   | 0.18   | -0.071 | 0.246  | 0.204  | 8.48E-06 |
| AC097523.3 | 0.436  | -0.284 | -0.769 | -0.782 | -0.323 | 8.52E-06 |
| AP3S2      | 0.107  | 0.044  | 0.09   | 0.246  | 0.466  | 8.55E-06 |
| SMG9       | -0.077 | 0.063  | 0.032  | -0.046 | -0.326 | 8.55E-06 |
| LRRC8D     | -0.266 | -0.421 | -0.361 | -0.3   | -0.426 | 8.60E-06 |
| RP11-465B2 | -0.394 | 0.176  | 0.559  | -0.06  | 0.577  | 8.62E-06 |
| GLE1       | 0.049  | 0.119  | 0.153  | 0.346  | -0.106 | 8.62E-06 |

|            |        |        |        |        |        |          |
|------------|--------|--------|--------|--------|--------|----------|
| SNORD93    | -0.875 | -0.11  | -0.249 | -0.877 | -1.309 | 8.69E-06 |
| ERP44      | 0.193  | 0.119  | 0.039  | 0.362  | -0.035 | 8.72E-06 |
| PIP5K1A    | 0.383  | 0.201  | -0.007 | 0.239  | -0.022 | 8.73E-06 |
| CCL20      | 0.252  | 0.765  | 0.002  | -0.28  | 1.062  | 8.75E-06 |
| RP11-390K5 | -0.637 | -0.018 | 0.042  | -0.8   | -0.82  | 8.75E-06 |
| PLEKHA5    | -0.08  | -0.004 | 0.037  | 0.196  | 0.523  | 8.76E-06 |
| ACE        | 0.476  | 0.006  | -0.256 | -0.065 | -0.349 | 8.79E-06 |
| RNFT1      | -0.174 | 0.069  | 0.275  | 0.034  | -0.336 | 8.87E-06 |
| TTC30A     | -0.086 | 0.212  | 0.068  | 0.645  | 0.59   | 8.94E-06 |
| ZCCHC10    | -0.394 | -0.186 | -0.143 | -0.509 | -0.616 | 8.97E-06 |
| RP11-196N1 | -0.126 | 0.125  | 0.128  | -0.64  | -0.199 | 8.98E-06 |
| RP11-177H2 | 0.361  | -0.25  | -0.311 | 0.167  | -0.097 | 9.03E-06 |
| GPR75      | -0.081 | 0.214  | 0.264  | -0.684 | -0.279 | 9.03E-06 |
| RP11-215D1 | 0.193  | -0.123 | 0.039  | -0.083 | -0.489 | 9.03E-06 |
| MACF1      | -0.144 | -0.208 | -0.001 | -0.328 | 0.31   | 9.11E-06 |
| EXOSC3     | -0.111 | 0.032  | -0.161 | -0.005 | -0.423 | 9.11E-06 |
| SEC22C     | -0.23  | -0.209 | -0.219 | -0.235 | -0.333 | 9.24E-06 |
| GDI2       | 0.386  | 0.096  | -0.056 | 0.249  | 0.206  | 9.35E-06 |
| PPP1R9B    | -0.385 | -0.22  | -0.112 | -0.216 | -0.074 | 9.37E-06 |
| HOTTIP     | -0.427 | 0.15   | 0.36   | 0.413  | 0.623  | 9.41E-06 |
| ME2        | 0.218  | 0.12   | 0.05   | 0.386  | 0.258  | 9.42E-06 |
| PNISR      | -0.336 | 0.059  | 0.151  | -0.463 | -0.217 | 9.46E-06 |
| SPTY2D1    | 0.518  | 0.304  | 0.039  | 0.207  | 0.164  | 9.49E-06 |
| RP11-352M1 | 0.075  | 0.164  | 0.153  | -0.1   | -0.366 | 9.55E-06 |
| TALDO1     | 0.218  | 0.097  | 0.003  | 0.393  | 0.038  | 9.58E-06 |
| CXorf38    | -0.063 | -0.03  | 0.039  | 0.061  | -0.33  | 9.61E-06 |
| DDB1       | 0.463  | 0.259  | 0.231  | 0.648  | 0.635  | 9.62E-06 |
| RP11-903H1 | 0.075  | -0.25  | -0.213 | -0.003 | -0.521 | 9.62E-06 |
| EXOSC6     | -0.102 | -0.357 | -0.355 | -0.246 | -0.16  | 9.67E-06 |
| AC000123.3 | -0.32  | 0.053  | -0.127 | -1.092 | -0.844 | 9.69E-06 |
| RF00278    | -0.365 | 0.258  | 0.345  | -0.532 | -0.799 | 9.71E-06 |
| MAP3K8     | 0.555  | -0.056 | -0.116 | -0.531 | -0.192 | 9.76E-06 |
| POLR1B     | -0.329 | 0.016  | -0.064 | 0.153  | -0.329 | 9.76E-06 |
| RP11-31F15 | -0.217 | -0.143 | 0.22   | -0.399 | -0.16  | 9.79E-06 |
| ELAVL1     | 0.232  | -0.007 | -0.056 | 0.293  | 0.456  | 9.86E-06 |
| SNORA33    | -0.087 | 0.381  | 0.102  | -0.57  | -0.693 | 9.90E-06 |
| TLE6       | -0.565 | -0.423 | 0.176  | -0.315 | 0.458  | 1.00E-05 |
| MAP1LC3A   | -0.255 | 0.054  | 0.066  | 0.033  | 0.343  | 1.00E-05 |

|            |        |        |        |        |        |          |
|------------|--------|--------|--------|--------|--------|----------|
| DHX33      | -0.037 | 0.037  | -0.086 | -0.124 | -0.328 | 1.01E-05 |
| MTL1       | -0.066 | -0.324 | -0.253 | -0.351 | -0.873 | 1.01E-05 |
| RP11-255A1 | 0.183  | 0.022  | 0.01   | -0.589 | -0.897 | 1.01E-05 |
| SLC25A23   | 0.05   | -0.076 | 0.009  | 0.082  | 0.39   | 1.02E-05 |
| RP5-865M20 | 0.378  | -0.004 | -0.074 | 0.354  | -0.019 | 1.02E-05 |
| ZNRF3      | 0.35   | 0.145  | 0.001  | -0.072 | -0.14  | 1.02E-05 |
| SLC25A11   | 0.033  | -0.152 | -0.231 | 0.105  | -0.393 | 1.02E-05 |
| C12orf76   | -0.363 | 0.159  | 0.286  | -0.038 | 0.263  | 1.04E-05 |
| VBP1       | -0.116 | -0.112 | -0.15  | -0.345 | -0.521 | 1.04E-05 |
| ACLY       | 0.438  | 0.037  | -0.137 | 0.198  | 0.437  | 1.05E-05 |
| MARCH8     | 0.363  | 0.398  | 0.254  | 0.395  | 0.402  | 1.05E-05 |
| NLN        | 0.463  | -0.037 | -0.138 | 0.241  | 0.248  | 1.05E-05 |
| USP38      | 0.366  | 0.133  | -0.067 | 0.134  | 0.07   | 1.05E-05 |
| RP11-555H2 | 0.291  | 0.046  | -0.033 | 0.43   | 0.585  | 1.06E-05 |
| DDX6       | 0.34   | 0.206  | 0.072  | 0.329  | 0.436  | 1.06E-05 |
| CTC-329H14 | 0.155  | -0.028 | 0.014  | 0.28   | 0.361  | 1.06E-05 |
| ANKRD36B   | -0.794 | -0.251 | -0.062 | -0.681 | -0.786 | 1.06E-05 |
| RP11-296P7 | 0.378  | 0.1    | 0.028  | 0.479  | -0.024 | 1.07E-05 |
| SPRY2      | -0.33  | -0.022 | 0.053  | -0.002 | -0.127 | 1.07E-05 |
| MOV10L1    | -0.177 | 0.032  | 0.128  | -0.442 | -0.399 | 1.07E-05 |
| RP5-1043F6 | 0.379  | -0.131 | -0.061 | 0.414  | 0.512  | 1.08E-05 |
| MILR1      | -0.531 | -0.513 | -0.068 | -0.2   | 0.076  | 1.09E-05 |
| FAM177A1   | 0.326  | 0.125  | 0.075  | 0.162  | 0.199  | 1.10E-05 |
| ADCK4      | -0.324 | 0.065  | 0.242  | 0.121  | -0.187 | 1.10E-05 |
| S100A3     | 0.353  | 0.281  | 0.159  | 0.233  | 1.241  | 1.11E-05 |
| GSPT1      | 0.362  | 0.014  | -0.131 | 0.241  | 0.318  | 1.11E-05 |
| ACTR5      | -0.203 | 0.048  | 0.041  | -0.124 | -0.363 | 1.11E-05 |
| SLC25A33   | -0.248 | -0.204 | -0.448 | -0.668 | -0.428 | 1.11E-05 |
| C9orf9     | -0.03  | 0.018  | 0.239  | 0.601  | 0.666  | 1.12E-05 |
| USP32P1    | -0.482 | 0.07   | 0.173  | -0.772 | -0.522 | 1.12E-05 |
| RP11-574K1 | -0.311 | -0.08  | 0.143  | -0.487 | -0.683 | 1.12E-05 |
| SRPRA      | 0.323  | 0.096  | -0.025 | 0.204  | -0.23  | 1.13E-05 |
| RP11-417L1 | -0.342 | 0.061  | 0.219  | -0.594 | -0.762 | 1.13E-05 |
| HEATR5A    | 0.16   | 0.11   | 0.075  | 0.31   | 0.425  | 1.15E-05 |
| DAAM1      | 0.414  | 0.304  | -0.018 | 0.114  | 0.363  | 1.15E-05 |
| OGFOD1     | 0.257  | 0.147  | 0.163  | 0.413  | 0.298  | 1.15E-05 |
| GLA        | 0.047  | 0.235  | 0.115  | 0.324  | 0.201  | 1.15E-05 |
| METRNL     | -0.166 | -0.315 | -0.315 | -0.525 | 0.133  | 1.15E-05 |

|             |        |        |        |        |        |          |
|-------------|--------|--------|--------|--------|--------|----------|
| MRPL47      | -0.118 | 0.022  | -0.088 | -0.237 | -0.378 | 1.15E-05 |
| KCNMB1      | 0.161  | -0.098 | -0.022 | -0.347 | -0.664 | 1.15E-05 |
| SNHG11      | -0.627 | -0.289 | -0.181 | -0.802 | -0.669 | 1.15E-05 |
| SEL1L       | 0.343  | 0.132  | -0.062 | 0.182  | 0.008  | 1.16E-05 |
| GPHN        | 0.531  | 0.206  | 0.301  | 0.672  | 0.261  | 1.17E-05 |
| TRNT1       | -0.416 | -0.153 | -0.003 | -0.25  | -0.186 | 1.17E-05 |
| ZNF772      | -0.311 | 0.093  | -0.003 | 0.06   | 0.403  | 1.18E-05 |
| CDC5L       | 0.451  | 0.251  | 0.016  | 0.43   | 0.293  | 1.18E-05 |
| C22orf39    | -0.429 | -0.331 | -0.159 | -0.301 | -0.282 | 1.19E-05 |
| SHPRH       | -0.205 | 0.04   | -0.125 | -0.172 | -0.472 | 1.19E-05 |
| RP11-393M1  | 0.203  | -0.12  | -0.051 | 0.06   | -0.323 | 1.20E-05 |
| ADGRG6      | -0.051 | -0.167 | -0.386 | -0.266 | -0.346 | 1.20E-05 |
| ISCA2       | -0.445 | -0.231 | 0.006  | -0.086 | -0.483 | 1.20E-05 |
| PHYH        | 0.176  | 0.392  | 0.514  | 0.578  | 0.556  | 1.21E-05 |
| SEC24D      | 0.422  | -0.02  | 0.035  | 0.318  | 0.361  | 1.21E-05 |
| RP11-144L1. | 0.265  | 0.123  | 0.236  | 0.429  | 0.352  | 1.21E-05 |
| GPR176      | 0.102  | 0.271  | 0.207  | 0.332  | 0.216  | 1.21E-05 |
| RP11-196G1  | -0.58  | 0.087  | 0.514  | -0.75  | -0.481 | 1.21E-05 |
| PPAN        | -0.286 | -0.037 | -0.059 | -0.408 | -0.608 | 1.21E-05 |
| RP11-723P1  | -0.213 | -0.293 | -0.298 | -0.61  | -0.977 | 1.21E-05 |
| AC006129.4  | -0.119 | 0.223  | 0.258  | -0.19  | 1.018  | 1.22E-05 |
| DDX3X       | 0.456  | 0.19   | -0.022 | 0.164  | 0.083  | 1.22E-05 |
| AP3M1       | 0.18   | 0.101  | 0.052  | 0.348  | 0.387  | 1.23E-05 |
| RBM12       | 0.347  | 0.034  | -0.216 | 0.019  | -0.014 | 1.23E-05 |
| UGDH        | 0.474  | 0.096  | -0.004 | 0.314  | -0.154 | 1.24E-05 |
| TOP1        | 0.03   | 0.075  | 0.018  | 0.298  | 0.496  | 1.25E-05 |
| RBM48       | 0.094  | 0.416  | 0.36   | -0.131 | -0.136 | 1.25E-05 |
| NFE2L3P1    | 0.091  | -0.003 | 0.309  | 0.543  | 1.055  | 1.26E-05 |
| EXOC1       | 0.126  | 0.161  | 0.174  | 0.39   | 0.386  | 1.26E-05 |
| RP4-599G15  | -0.647 | 0.016  | 0.758  | 0.555  | 0.316  | 1.26E-05 |
| ZNF621      | 0.001  | 0.186  | 0.346  | 0.014  | -0.039 | 1.27E-05 |
| SHANK3      | -0.236 | -0.119 | 0.122  | -0.483 | -0.297 | 1.27E-05 |
| RP4-665J23. | 0.082  | -0.051 | -0.188 | -0.187 | -0.874 | 1.27E-05 |
| C7orf13     | -0.605 | -0.071 | 0.205  | 0.263  | 0.166  | 1.28E-05 |
| AP4E1       | 0.324  | 0.318  | 0.261  | 0.366  | 0.089  | 1.28E-05 |
| PA2G4       | 0.427  | 0.237  | 0.097  | 0.488  | 0.015  | 1.28E-05 |
| STK3        | 0.055  | 0.353  | 0.031  | -0.028 | -0.239 | 1.28E-05 |
| MAP2K2      | 0.13   | 0.079  | 0.045  | 0.248  | 0.404  | 1.29E-05 |

|             |        |        |        |        |        |          |
|-------------|--------|--------|--------|--------|--------|----------|
| BPHL        | -0.062 | 0.038  | -0.033 | 0.032  | 0.371  | 1.29E-05 |
| FAM155A     | 0.227  | 0.006  | -0.362 | -0.481 | -0.001 | 1.29E-05 |
| ASL         | -0.023 | 0.026  | -0.09  | -0.081 | -0.389 | 1.29E-05 |
| RP11-140L2  | -0.182 | 0.295  | 0.366  | -0.629 | -0.437 | 1.29E-05 |
| SFT2D1      | -0.215 | -0.106 | -0.013 | -0.251 | -0.5   | 1.29E-05 |
| XPR1        | 0.172  | 0.275  | 0.099  | 0.337  | 0.405  | 1.30E-05 |
| OAT         | 0.444  | 0.123  | -0.109 | 0.292  | 0.389  | 1.30E-05 |
| NDUFC1      | -0.219 | -0.156 | -0.063 | -0.312 | -0.547 | 1.30E-05 |
| GANAB       | 0.294  | 0.107  | 0.022  | 0.413  | 0.478  | 1.31E-05 |
| KIF3B       | 0.191  | 0.193  | 0.149  | 0.082  | 0.323  | 1.31E-05 |
| ZNF25       | -0.099 | -0.253 | -0.234 | -0.507 | -0.439 | 1.31E-05 |
| RP11-487I9  | 0.334  | -0.276 | -0.256 | -0.162 | -0.945 | 1.31E-05 |
| RTF1        | 0.255  | 0.084  | -0.083 | 0.261  | 0.365  | 1.32E-05 |
| C1D         | -0.293 | -0.117 | -0.065 | -0.655 | -0.812 | 1.32E-05 |
| THAP8       | -0.269 | 0.086  | 0.163  | 0.621  | -0.121 | 1.33E-05 |
| COPA        | 0.425  | 0.089  | 0.062  | 0.358  | 0.526  | 1.38E-05 |
| EEFSEC      | 0.314  | 0.223  | 0.363  | 0.673  | 0.246  | 1.38E-05 |
| ZFC3H1      | -0.441 | -0.066 | 0.185  | -0.173 | -0.004 | 1.38E-05 |
| RAB21       | 0.457  | 0.261  | -0.056 | 0.106  | 0.046  | 1.39E-05 |
| PRKAR2A     | 0.341  | 0.018  | -0.107 | 0.096  | 0.014  | 1.40E-05 |
| RNA5-8SN3   | -0.257 | 0.337  | -0.244 | -1.117 | -0.708 | 1.40E-05 |
| RP1-283E3.8 | -0.176 | 0.234  | 0.175  | -0.629 | -0.327 | 1.41E-05 |
| SNORD83A    | -0.64  | 0.087  | -0.144 | -0.926 | -0.797 | 1.41E-05 |
| IL17RC      | -0.111 | 0.014  | 0.142  | 0.19   | 0.332  | 1.42E-05 |
| ADAMTS13    | -0.282 | 0.085  | 0.71   | 0.08   | 0.211  | 1.42E-05 |
| MED26       | 0.42   | 0.079  | -0.272 | -0.081 | -0.081 | 1.42E-05 |
| TET2        | -0.006 | 0.043  | -0.201 | -0.257 | -0.331 | 1.42E-05 |
| CAP1        | 0.455  | 0.118  | -0.042 | 0.378  | 0.403  | 1.43E-05 |
| CTD-2339L1  | -0.099 | 0.498  | 0.61   | -0.35  | -0.297 | 1.43E-05 |
| HSP90B2P    | 0.334  | -0.038 | -0.063 | 0.288  | -0.082 | 1.44E-05 |
| FAM104B     | -0.141 | -0.186 | -0.232 | -0.525 | -0.577 | 1.44E-05 |
| CCDC90B     | -0.028 | 0.211  | 0.406  | 0.268  | 0.335  | 1.46E-05 |
| WASHC2A     | 0.304  | 0.423  | 0.451  | 0.39   | 0.451  | 1.47E-05 |
| BMS1        | 0.411  | 0.076  | 0.06   | 0.369  | 0.116  | 1.47E-05 |
| LIFR        | 0.119  | -0.074 | -0.232 | -0.18  | -0.327 | 1.47E-05 |
| DHX30       | 0.079  | 0.038  | -0.117 | -0.008 | -0.337 | 1.47E-05 |
| CLUH        | -0.007 | -0.068 | -0.17  | -0.219 | -0.398 | 1.47E-05 |
| RP11-395L1  | -0.067 | 0.245  | 0.337  | 0.425  | 0.506  | 1.48E-05 |



|             |        |        |        |        |        |          |
|-------------|--------|--------|--------|--------|--------|----------|
| GMFB        | -0.442 | -0.106 | 0.205  | 0.16   | 0.025  | 1.48E-05 |
| CD99L1      | -0.222 | 0.009  | 0.082  | -0.349 | 0.119  | 1.49E-05 |
| EIF4G3      | 0.258  | 0.104  | 0.098  | 0.402  | 0.327  | 1.50E-05 |
| RP11-705C1  | 0.147  | -0.144 | -0.149 | 0.299  | 0.481  | 1.51E-05 |
| USP9X       | 0.298  | 0.112  | 0.029  | 0.312  | 0.435  | 1.51E-05 |
| C8orf82     | -0.204 | 0.062  | 0.04   | 0.145  | 0.362  | 1.51E-05 |
| MROH1       | -0.324 | 0.025  | 0.152  | -0.149 | 0.026  | 1.51E-05 |
| ZCCHC8      | -0.052 | 0.039  | 0.072  | -0.077 | -0.404 | 1.51E-05 |
| FBXO11      | 0.194  | 0.178  | 0.1    | 0.176  | 0.343  | 1.52E-05 |
| EMC2        | 0.338  | 0.115  | 0.028  | 0.285  | -0.112 | 1.53E-05 |
| LRRC2       | -0.256 | 0.033  | 0.331  | 0.691  | 0.459  | 1.54E-05 |
| SLC4A2      | 0.009  | -0.075 | -0.171 | -0.122 | -0.402 | 1.54E-05 |
| GALM        | -0.052 | -0.135 | -0.066 | 0.373  | 0.652  | 1.55E-05 |
| SMU1        | 0.33   | 0.184  | 0.06   | 0.383  | 0.304  | 1.56E-05 |
| PSMD4       | 0.356  | 0.142  | 0.005  | 0.432  | 0.158  | 1.57E-05 |
| RP11-1277A  | -0.129 | 0.191  | 0.582  | 0.704  | 0.838  | 1.60E-05 |
| MORC4       | 0.321  | 0.392  | 0.182  | 0.385  | -0.082 | 1.60E-05 |
| AXIN2       | 0.415  | -0.09  | -0.131 | -0.218 | -0.335 | 1.60E-05 |
| BAHCC1      | 0.038  | -0.394 | -0.092 | 0.035  | 0.265  | 1.61E-05 |
| RECQL       | 0.352  | 0.153  | 0.078  | 0.445  | 0.416  | 1.62E-05 |
| EIF1AY      | 0.064  | 0.01   | -0.011 | 0.007  | -0.367 | 1.62E-05 |
| PGK1        | 0.358  | 0.068  | -0.051 | 0.365  | 0.254  | 1.63E-05 |
| DYNLL1      | -0.07  | -0.228 | -0.249 | -0.649 | -0.288 | 1.63E-05 |
| RP4-647C14  | 0.334  | 0.022  | 0.187  | 0.46   | 0.526  | 1.64E-05 |
| RP11-721G1  | 0.398  | 0.05   | -0.018 | 0.43   | 0.209  | 1.65E-05 |
| FASTKD5     | 0.502  | 0.223  | -0.03  | 0.309  | 0.131  | 1.65E-05 |
| ZNF823      | -0.262 | 0.137  | -0.146 | -0.342 | -0.599 | 1.65E-05 |
| RP11-422P2  | -0.407 | -0.391 | -0.184 | -0.767 | -0.678 | 1.65E-05 |
| TAB1        | -0.14  | -0.001 | 0.062  | 0.378  | -0.03  | 1.66E-05 |
| RP11-3D4.2  | 0.122  | 0.222  | 0.313  | -0.891 | -0.475 | 1.66E-05 |
| CTD-2587H2  | -0.347 | 0.032  | -0.052 | -0.849 | -0.446 | 1.67E-05 |
| BAIAP2      | 0.553  | 0.308  | 0.02   | 0.059  | 0.188  | 1.68E-05 |
| CLHC1       | -0.333 | 0.273  | 0.467  | -0.188 | -0.252 | 1.68E-05 |
| CTB-58E17.1 | -0.491 | 0.33   | -0.291 | -0.264 | -0.919 | 1.68E-05 |
| GFM1        | 0.27   | 0.087  | 0.019  | 0.384  | 0.309  | 1.69E-05 |
| ARHGAP31    | 0.456  | 0.077  | 0.039  | 0.283  | 0.345  | 1.70E-05 |
| CPNE5       | 0.256  | -0.214 | -0.009 | -0.118 | 0.453  | 1.71E-05 |
| SETD7       | 0.362  | 0.101  | 0.014  | 0.171  | 0.273  | 1.71E-05 |

|            |        |        |        |        |        |          |
|------------|--------|--------|--------|--------|--------|----------|
| GTF3A      | -0.355 | -0.165 | -0.016 | -0.146 | 0.17   | 1.71E-05 |
| RP3-449O17 | -0.216 | -0.194 | 0.132  | -0.653 | 0.589  | 1.72E-05 |
| PLEKHA4    | -0.177 | 0.001  | 0.4    | 0.189  | 0.203  | 1.73E-05 |
| ACTG1      | 0.445  | 0.017  | -0.197 | 0.085  | 0.034  | 1.73E-05 |
| BTBD9      | 0.401  | 0.036  | 0.091  | 0.476  | 0.367  | 1.74E-05 |
| LRRC59     | 0.425  | 0.045  | -0.101 | 0.195  | 0.06   | 1.74E-05 |
| ZNF584     | 0.368  | 0.145  | -0.197 | -0.132 | -0.201 | 1.74E-05 |
| DIAPH3     | 0.057  | 0.194  | 0.053  | 0.511  | 0.417  | 1.75E-05 |
| KRBOX4     | -0.281 | -0.05  | 0.02   | -0.474 | -0.491 | 1.75E-05 |
| SP1        | 0.332  | 0.069  | 0.171  | 0.207  | -0.073 | 1.76E-05 |
| SLC9A5     | -0.272 | -0.057 | 0.251  | -0.521 | -0.276 | 1.76E-05 |
| VPS11      | 0.183  | 0.131  | 0.147  | 0.39   | 0.204  | 1.77E-05 |
| BBS7       | 0.145  | 0.327  | 0.316  | 0.258  | 0.063  | 1.77E-05 |
| ABCD3      | 0.35   | 0.131  | 0.002  | 0.256  | -0.082 | 1.77E-05 |
| AC012146.7 | -0.632 | -0.391 | -0.354 | -0.796 | -0.931 | 1.77E-05 |
| RP11-873E2 | 0.097  | 0.072  | 0.015  | -0.024 | 1.043  | 1.78E-05 |
| PPP1R7     | 0.297  | 0      | -0.087 | 0.33   | 0.327  | 1.78E-05 |
| FBXO4      | 0.09   | -0.101 | -0.259 | -0.231 | -0.546 | 1.78E-05 |
| RP11-325E1 | -0.674 | -0.48  | -0.362 | -0.367 | -0.88  | 1.78E-05 |
| HMGB2P1    | -0.295 | -0.726 | -0.771 | -0.297 | -0.925 | 1.78E-05 |
| PYGB       | 0.345  | 0.006  | -0.065 | 0.186  | 0.42   | 1.79E-05 |
| TCP11L1    | 0.131  | 0.343  | 0.323  | 0.396  | 0.166  | 1.79E-05 |
| PRKAR2B    | 0.198  | 0.072  | 0.13   | 0.463  | 0.075  | 1.79E-05 |
| LIN9       | -0.037 | -0.186 | -0.409 | -0.359 | -0.448 | 1.79E-05 |
| RP11-722A1 | 0.033  | 0.029  | 0.344  | 0.438  | 0.621  | 1.80E-05 |
| PAXBP1     | -0.127 | 0.087  | 0.014  | -0.474 | -0.3   | 1.80E-05 |
| RPL26L1    | -0.104 | -0.108 | -0.037 | -0.299 | -0.509 | 1.81E-05 |
| RP11-219A1 | -0.408 | -0.14  | 0.126  | -0.949 | -0.547 | 1.81E-05 |
| RP5-1180D1 | 0.348  | 0.118  | 0.354  | 0.265  | 0.732  | 1.82E-05 |
| SPPL2B     | -0.422 | -0.004 | 0.047  | -0.413 | -0.313 | 1.82E-05 |
| BLOC1S2    | 0.427  | 0.583  | 0.604  | 0.267  | 0.445  | 1.83E-05 |
| PRKCI      | 0.197  | 0.202  | 0.19   | 0.395  | 0.402  | 1.83E-05 |
| SORD       | 0.094  | -0.07  | -0.12  | 0.266  | 0.379  | 1.83E-05 |
| SPRTN      | 0.336  | 0.061  | 0.045  | 0.294  | 0.012  | 1.83E-05 |
| YWHAG      | 0.294  | 0.027  | -0.046 | 0.264  | 0.391  | 1.84E-05 |
| HNRNPR     | 0.404  | 0.031  | -0.206 | 0.174  | 0.031  | 1.84E-05 |
| RP11-328D5 | -0.355 | 0.162  | 0.352  | -0.366 | -0.071 | 1.84E-05 |
| SPAG1      | 0.436  | 0.229  | -0.073 | 0.101  | -0.073 | 1.84E-05 |

|            |        |        |        |        |        |          |
|------------|--------|--------|--------|--------|--------|----------|
| TCEA1      | 0.329  | 0.196  | 0.083  | 0.311  | 0.35   | 1.85E-05 |
| C12orf57   | -0.21  | -0.195 | -0.146 | -0.233 | -0.509 | 1.85E-05 |
| CKLF       | -0.482 | -0.335 | -0.165 | -0.555 | -0.663 | 1.85E-05 |
| IL18       | -0.09  | 0.102  | -0.466 | -0.288 | -1.287 | 1.85E-05 |
| GTF3C3     | 0.102  | 0.132  | 0.099  | 0.336  | 0.139  | 1.86E-05 |
| SEC24A     | 0.266  | 0.241  | 0.131  | 0.295  | 0.479  | 1.87E-05 |
| RP11-744O1 | 0.299  | 0.016  | 0.02   | 0.281  | 0.419  | 1.87E-05 |
| RNF6       | 0.366  | 0.194  | 0.059  | 0.291  | 0.282  | 1.87E-05 |
| MMACHC     | -0.234 | 0.032  | 0.287  | 0.517  | 0.33   | 1.88E-05 |
| KARS       | 0.342  | 0.092  | -0.028 | 0.367  | 0.292  | 1.88E-05 |
| SNORD49A   | -0.327 | -0.125 | 0.154  | -0.768 | -0.913 | 1.88E-05 |
| C7orf49    | -0.292 | -0.066 | -0.122 | -0.143 | -0.409 | 1.89E-05 |
| SH3BGRL3   | 0.2    | -0.027 | -0.002 | 0.267  | 0.335  | 1.90E-05 |
| RP11-345P4 | 0.277  | 0.243  | 0.226  | -0.223 | -0.526 | 1.90E-05 |
| MIR3189    | 1.057  | 1.308  | 1.355  | 0.669  | 1.112  | 1.92E-05 |
| CES4A      | -0.267 | -0.004 | 0.435  | -0.215 | 0.319  | 1.92E-05 |
| OSGEP      | -0.108 | -0.038 | -0.008 | -0.408 | -0.346 | 1.92E-05 |
| RP11-166B2 | -0.516 | 0.076  | -0.344 | -1.114 | -0.578 | 1.92E-05 |
| KCNAB2     | 0.248  | -0.24  | 0.072  | 0.49   | 0.599  | 1.94E-05 |
| RPL3P2     | 0.101  | -0.135 | 0.144  | 0.228  | 0.402  | 1.94E-05 |
| AKR1C1     | -0.085 | -0.225 | -0.162 | -0.097 | -0.696 | 1.94E-05 |
| PAQR3      | -0.027 | 0.05   | -0.151 | -0.389 | -0.297 | 1.95E-05 |
| RP11-390P2 | -0.81  | -0.137 | -0.037 | -0.925 | -0.341 | 1.95E-05 |
| ZNF45      | -0.104 | 0.063  | -0.146 | -0.226 | -0.383 | 1.95E-05 |
| NBPF12     | -0.207 | -0.037 | 0.11   | -0.503 | -0.275 | 1.98E-05 |
| LOC134466  | -0.459 | 0.067  | 0.334  | -0.487 | -0.301 | 1.98E-05 |
| PUS7L      | -0.185 | -0.029 | 0.055  | -0.057 | -0.375 | 1.98E-05 |
| MRPS31     | -0.012 | -0.001 | 0.079  | 0.084  | -0.395 | 1.99E-05 |
| C9orf78    | 0.319  | 0.098  | 0.007  | 0.347  | 0.17   | 2.02E-05 |
| INAFM2     | 0.359  | 0.131  | 0.101  | 0.333  | 0.211  | 2.03E-05 |
| ROCK2      | 0.135  | 0.037  | 0.055  | 0.283  | 0.361  | 2.05E-05 |
| C8orf59    | -0.367 | -0.161 | -0.099 | -0.686 | -0.659 | 2.05E-05 |
| DAZAP2     | 0.317  | 0.122  | 0.033  | 0.365  | 0.167  | 2.07E-05 |
| DYNC1LI2   | -0.206 | 0.073  | 0.128  | -0.356 | -0.005 | 2.07E-05 |
| AGAP9      | -0.307 | -0.315 | -0.066 | -0.751 | -0.976 | 2.09E-05 |
| PLBD2      | 0.224  | 0.111  | 0.13   | 0.417  | 0.544  | 2.12E-05 |
| AURKAPS1   | -0.804 | -0.961 | -1.012 | -0.738 | -0.399 | 2.12E-05 |
| C4A        | -0.407 | 0.427  | 0.361  | -0.5   | -0.612 | 2.12E-05 |

|             |        |        |        |        |        |          |
|-------------|--------|--------|--------|--------|--------|----------|
| KIF4A       | -0.259 | -0.495 | -0.482 | -0.048 | -0.109 | 2.13E-05 |
| CLK4        | 0.066  | 0.18   | 0.038  | -0.556 | -0.218 | 2.13E-05 |
| HES6        | -0.508 | -0.49  | -0.764 | -0.877 | -0.259 | 2.13E-05 |
| PYGL        | 0.295  | 0.034  | 0.004  | 0.391  | 0.468  | 2.14E-05 |
| TBCD        | 0.065  | -0.004 | 0.069  | 0.063  | 0.33   | 2.16E-05 |
| TMX4        | 0.152  | 0.137  | 0.074  | 0.268  | 0.325  | 2.17E-05 |
| NMRK1       | -0.179 | 0.038  | 0.383  | 0.138  | 0.32   | 2.17E-05 |
| KIAA1143    | 0.28   | 0.177  | 0.126  | 0.239  | 0.327  | 2.18E-05 |
| XXbac-BPG1  | -0.801 | 0.333  | 0.196  | -0.26  | -0.123 | 2.20E-05 |
| ZNF431      | -0.076 | -0.098 | -0.12  | -0.728 | -0.276 | 2.20E-05 |
| CCDC144A    | -0.493 | -0.033 | 0.175  | -0.857 | -0.593 | 2.20E-05 |
| CDCA7L      | 0.25   | 0.028  | 0.036  | 0.352  | 0.346  | 2.21E-05 |
| PLAG1       | 0.023  | 0.08   | -0.137 | -0.304 | -0.532 | 2.21E-05 |
| RP11-14C22  | 0.071  | 0.133  | 0.336  | 0.123  | 0.957  | 2.23E-05 |
| TRAF6       | 0.403  | 0.33   | 0.241  | 0.119  | 0.482  | 2.23E-05 |
| HBS1L       | 0.315  | 0.148  | 0.031  | 0.344  | 0.197  | 2.24E-05 |
| RSRP1       | -0.384 | -0.006 | 0.049  | -0.824 | -0.494 | 2.24E-05 |
| CNN2        | 0.319  | 0.001  | -0.139 | 0.068  | 0.382  | 2.25E-05 |
| UFSP2       | 0.141  | 0.115  | 0.2    | 0.431  | 0.08   | 2.25E-05 |
| SOCS7       | 0.116  | -0.007 | -0.101 | -0.427 | -0.208 | 2.25E-05 |
| RP1-320J15. | 0.279  | 0.003  | 0.133  | 0.465  | 0.578  | 2.26E-05 |
| GNL2        | 0.336  | 0.148  | 0.058  | 0.32   | -0.147 | 2.27E-05 |
| RP11-236M5  | 0.245  | -0.116 | 0.045  | 0.383  | 0.577  | 2.30E-05 |
| ARL15       | 0.384  | -0.021 | -0.027 | 0.131  | 0.079  | 2.30E-05 |
| KLHL3       | -0.369 | -0.601 | -0.168 | -0.172 | 0.122  | 2.31E-05 |
| KLF16       | -0.246 | -0.421 | -0.282 | -0.17  | 0.15   | 2.32E-05 |
| UNC50       | -0.316 | -0.136 | -0.059 | -0.312 | -0.517 | 2.32E-05 |
| ERV3-1      | -0.034 | 0.097  | 0.172  | -0.414 | -0.052 | 2.33E-05 |
| TGM1        | 0.126  | 0.299  | 0.532  | -0.454 | -0.164 | 2.33E-05 |
| PAK1IP1     | -0.014 | -0.033 | -0.069 | -0.06  | -0.36  | 2.34E-05 |
| CCT2        | 0.34   | 0.014  | -0.074 | 0.277  | 0.167  | 2.35E-05 |
| RNASEH2A    | -0.026 | -0.021 | 0.022  | 0.365  | -0.186 | 2.35E-05 |
| RP11-83N9.5 | 0.594  | 1.175  | 1.258  | 1.029  | 0.527  | 2.37E-05 |
| RP11-429G1  | -0.291 | 0.037  | -0.176 | -0.173 | -0.627 | 2.38E-05 |
| RTCB        | 0.309  | 0.13   | 0.043  | 0.489  | 0.42   | 2.39E-05 |
| C1orf54     | -0.413 | -0.215 | -0.23  | -0.631 | 0.245  | 2.39E-05 |
| SNHG10      | -0.692 | -0.32  | -0.295 | -0.908 | -0.629 | 2.39E-05 |
| ZNF516      | -0.291 | -0.029 | -0.013 | -0.111 | 0.327  | 2.42E-05 |

|              |        |        |        |        |        |          |
|--------------|--------|--------|--------|--------|--------|----------|
| GOLGA6L5     | -0.168 | 0.068  | 0.478  | -0.563 | 0.236  | 2.42E-05 |
| UBE2MP1      | 0.114  | -0.089 | -0.122 | 0.064  | -0.362 | 2.42E-05 |
| MIR25        | -0.077 | -0.278 | -0.422 | -1.215 | -0.608 | 2.42E-05 |
| FAM72A       | -0.771 | -0.216 | -0.415 | -0.594 | -0.776 | 2.42E-05 |
| AC010877.1   | -0.203 | -0.203 | -0.112 | -0.372 | -0.614 | 2.43E-05 |
| PARVA        | 0.409  | 0.164  | 0.04   | 0.341  | 0.373  | 2.45E-05 |
| RP11-365P1   | -0.309 | 0.078  | 0.094  | -0.902 | -0.38  | 2.45E-05 |
| RP11-521C2   | -0.383 | -0.171 | 0.592  | 0.07   | 0.727  | 2.46E-05 |
| RPTOR        | 0.371  | 0.144  | 0.256  | 0.568  | 0.256  | 2.46E-05 |
| POPDC3       | 0.015  | -0.18  | -0.497 | -0.874 | -1.155 | 2.46E-05 |
| LMNA         | 0.432  | 0.174  | 0.125  | 0.567  | 0.588  | 2.47E-05 |
| SMARCA5      | 0.437  | 0.12   | -0.075 | 0.263  | 0.241  | 2.47E-05 |
| LRP11        | 0.328  | 0.1    | -0.043 | 0.268  | -0.084 | 2.49E-05 |
| MRPL1        | -0.016 | -0.188 | -0.146 | -0.222 | -0.448 | 2.49E-05 |
| C12orf29     | -0.256 | -0.145 | -0.192 | -0.441 | -0.606 | 2.50E-05 |
| C14orf132    | 0.271  | -0.15  | -0.442 | -0.656 | -0.807 | 2.50E-05 |
| P2RY11       | 0.594  | 0.233  | 0.341  | -0.16  | -0.322 | 2.51E-05 |
| POLR1E       | 0.089  | -0.239 | -0.424 | -0.125 | -0.117 | 2.52E-05 |
| RP11-350G2   | 0.055  | -0.181 | -0.177 | -0.125 | -0.536 | 2.52E-05 |
| RP1-257120.1 | 0.042  | -0.097 | -0.022 | 0.135  | 0.34   | 2.53E-05 |
| STAU1        | 0.345  | 0.105  | 0.022  | 0.38   | 0.502  | 2.56E-05 |
| HSPA4        | 0.273  | 0.054  | 0.015  | 0.463  | 0.329  | 2.56E-05 |
| IMMP1L       | -0.543 | -0.389 | -0.156 | -0.622 | -0.883 | 2.56E-05 |
| PHF3         | 0.229  | 0.11   | 0.007  | 0.147  | 0.387  | 2.57E-05 |
| AGGF1        | -0.14  | 0.141  | 0.132  | 0.224  | 0.333  | 2.57E-05 |
| AP002954.3   | 0.21   | -0.113 | 0.221  | -0.867 | -0.385 | 2.57E-05 |
| PDCD6IP      | 0.255  | 0.204  | 0.133  | 0.339  | 0.397  | 2.59E-05 |
| RP11-702F3   | 0.206  | -0.638 | -0.285 | 0.029  | 0.06   | 2.59E-05 |
| CNDP2        | 0.372  | 0.12   | 0.032  | 0.328  | 0.512  | 2.60E-05 |
| CSE1L        | 0.287  | 0.146  | 0.068  | 0.487  | 0.307  | 2.60E-05 |
| TMEM223      | -0.246 | -0.634 | -0.364 | -0.263 | -0.508 | 2.60E-05 |
| CEP126       | -0.066 | -0.14  | -0.067 | -0.234 | -0.72  | 2.60E-05 |
| PRR3         | -0.151 | -0.305 | -0.138 | -0.321 | -0.504 | 2.61E-05 |
| YIPF4        | 0.028  | 0.106  | 0.096  | 0.097  | 0.371  | 2.62E-05 |
| DNPH1        | -0.003 | -0.12  | -0.175 | -0.012 | 0.354  | 2.63E-05 |
| DUSP7        | 0.29   | -0.117 | 0.033  | 0.343  | 0.066  | 2.63E-05 |
| ACBD3        | 0.403  | 0.259  | 0.208  | 0.393  | 0.502  | 2.65E-05 |
| DCTN1        | 0.244  | 0.074  | 0.039  | 0.361  | 0.461  | 2.65E-05 |

|             |        |        |        |        |        |          |
|-------------|--------|--------|--------|--------|--------|----------|
| TLK2P1      | 0.424  | 0.035  | 0.034  | -0.003 | 0.155  | 2.65E-05 |
| ELOVL4      | 0.327  | 0.13   | -0.181 | -0.002 | -0.435 | 2.65E-05 |
| BLOC1S3     | 0.329  | 0.161  | -0.235 | -0.095 | -0.064 | 2.68E-05 |
| FBXW4P1     | 0.23   | -0.031 | -0.311 | -0.526 | -0.648 | 2.68E-05 |
| CTB-50L17.8 | -0.024 | -0.215 | -0.094 | -1.058 | -0.71  | 2.68E-05 |
| B3GNT8      | -0.031 | 0.143  | 0.111  | 0.407  | 0.468  | 2.70E-05 |
| EEF2KMT     | -0.147 | -0.162 | -0.156 | -0.109 | -0.503 | 2.70E-05 |
| UBXN6       | 0.099  | 0.07   | 0.032  | 0.283  | 0.336  | 2.72E-05 |
| TUBB3       | 0.412  | 0.155  | -0.011 | 0.234  | 0.517  | 2.74E-05 |
| RP11-983P1  | -0.497 | 0.041  | 0.119  | -0.284 | -0.822 | 2.74E-05 |
| PLIN2       | 0.295  | -0.065 | -0.085 | 0.422  | 0.138  | 2.78E-05 |
| SNX8        | -0.136 | -0.09  | -0.104 | -0.558 | -0.416 | 2.80E-05 |
| RP11-189B4  | -0.165 | -0.036 | 0.079  | -0.461 | -0.706 | 2.80E-05 |
| ADSS        | 0.203  | 0.099  | 0.109  | 0.451  | 0.246  | 2.85E-05 |
| RP11-603K1  | -0.228 | -0.371 | -0.298 | -0.645 | -0.534 | 2.86E-05 |
| KB-1440D3.1 | -1.083 | -0.687 | -0.357 | -0.848 | -1.179 | 2.86E-05 |
| FAM131B     | 0.305  | 0.091  | 0.171  | 0.589  | 0.814  | 2.88E-05 |
| GGT1        | -0.088 | 0.095  | 0.237  | 0.392  | 1.155  | 2.89E-05 |
| LRCH3       | 0.024  | 0.224  | 0.134  | 0.097  | 0.336  | 2.89E-05 |
| EIF2AK2     | 0.252  | 0.114  | 0.142  | 0.279  | 0.335  | 2.90E-05 |
| GPAT2       | -0.028 | 0.03   | -0.163 | -0.089 | -0.339 | 2.90E-05 |
| RFFL        | 0.393  | 0.006  | 0.109  | 0.119  | 0.283  | 2.91E-05 |
| SPG20       | 0.269  | 0.21   | 0.156  | 0.447  | 0.385  | 2.92E-05 |
| RP11-303E1  | 0.213  | 0.101  | -0.028 | 0.227  | -0.348 | 2.92E-05 |
| CLUAP1      | -0.094 | -0.137 | -0.079 | 0.313  | 0.388  | 2.94E-05 |
| GOSR2       | 0.323  | 0.088  | 0      | 0.01   | 0.009  | 2.94E-05 |
| RP11-266F1  | 0.011  | -0.167 | -0.187 | -0.404 | -0.443 | 2.95E-05 |
| AC079780.3  | 0.149  | 0.653  | 0.435  | 0.738  | 1.244  | 2.96E-05 |
| GOLGA6L9    | -0.712 | -0.107 | -0.498 | -1.192 | -0.675 | 2.97E-05 |
| TOM1        | 0.436  | 0.024  | 0.039  | 0.403  | 0.218  | 2.99E-05 |
| SNUPN       | -0.048 | -0.007 | 0.174  | 0.356  | 0.17   | 2.99E-05 |
| CTB-67I13.1 | 0.365  | -0.039 | 0.216  | 0.662  | 0.416  | 3.02E-05 |
| RP11-452G1  | -0.217 | -0.028 | 0.219  | -0.518 | -1.143 | 3.03E-05 |
| RP11-158H5  | -0.291 | 0.048  | -0.162 | -0.634 | -0.779 | 3.04E-05 |
| GNRH1       | -0.19  | 0.075  | 0.041  | -0.766 | -0.766 | 3.06E-05 |
| ECHDC2      | -0.349 | 0.004  | 0.165  | -0.328 | 0.384  | 3.07E-05 |
| TDRD7       | 0.034  | 0.041  | 0.217  | 0.403  | 0.436  | 3.08E-05 |
| AP001258.4  | -0.337 | 0.065  | 0.542  | 0.17   | 0.085  | 3.09E-05 |

|             |        |        |        |        |        |          |
|-------------|--------|--------|--------|--------|--------|----------|
| RP11-21L19. | -0.138 | 0.186  | -0.274 | -0.949 | -0.763 | 3.09E-05 |
| PAX8-AS1    | -0.462 | -0.003 | 0.104  | -0.334 | -0.03  | 3.13E-05 |
| RP11-365F1  | -0.536 | -0.405 | -0.249 | -0.975 | -0.47  | 3.13E-05 |
| ISG20L2     | -0.013 | -0.094 | -0.219 | -0.114 | -0.427 | 3.14E-05 |
| NOVA2       | 0.346  | -0.178 | 0.018  | 0.24   | 0.231  | 3.20E-05 |
| RBX1        | -0.329 | -0.173 | -0.148 | -0.473 | -0.629 | 3.20E-05 |
| IGLV5-52    | -0.355 | 0.046  | 0.218  | -0.675 | -0.252 | 3.22E-05 |
| CTA-217C2.  | -0.674 | -0.275 | -0.115 | -0.447 | -0.576 | 3.23E-05 |
| SLFNL1-AS1  | -0.368 | -0.079 | 0.133  | -0.937 | -0.405 | 3.24E-05 |
| CSNK2A3     | 0.371  | 0.169  | 0.093  | 0.39   | 0.467  | 3.28E-05 |
| ASNA1       | 0.21   | 0.046  | 0.056  | 0.335  | 0.291  | 3.28E-05 |
| RP13-685P2  | -0.856 | -0.709 | -0.488 | -0.864 | -0.315 | 3.28E-05 |
| GPAT3       | -0.065 | -0.133 | -0.08  | -0.118 | -0.758 | 3.28E-05 |
| PRDM10      | 0.104  | 0.304  | 0.414  | 0.133  | 0.183  | 3.31E-05 |
| EFCAB4B     | 0.213  | -0.099 | 0.04   | 0.099  | 0.331  | 3.32E-05 |
| SELO        | -0.378 | -0.043 | -0.052 | -0.352 | -0.253 | 3.35E-05 |
| RAMP2       | 0.247  | -0.078 | -0.304 | -0.06  | -0.443 | 3.37E-05 |
| MT-TT       | -0.301 | -0.063 | 0.131  | -0.822 | -1.026 | 3.37E-05 |
| TNFSF13     | -0.31  | 0.278  | 0.277  | 0.441  | 0.55   | 3.38E-05 |
| HMHA1       | -0.284 | -0.329 | 0.142  | 0.141  | -0.298 | 3.40E-05 |
| CTD-2207P1  | -0.321 | -0.165 | 0.053  | 0.069  | 0.876  | 3.43E-05 |
| SCARB1      | 0.242  | 0.061  | -0.074 | 0.259  | 0.377  | 3.46E-05 |
| ANAPC7      | 0.046  | 0.074  | 0.135  | 0.335  | 0.109  | 3.46E-05 |
| DUS2        | 0.098  | 0.064  | 0.198  | 0.377  | -0.174 | 3.46E-05 |
| BLMH        | 0.376  | 0.096  | -0.058 | 0.168  | -0.04  | 3.48E-05 |
| RP1-122P22  | -0.322 | 0.239  | 0.606  | 0.818  | 0.875  | 3.50E-05 |
| PAIP1P1     | 0.028  | 0.268  | 0.404  | -0.399 | -0.911 | 3.50E-05 |
| AP1B1       | 0.211  | 0.113  | 0.061  | 0.435  | 0.538  | 3.51E-05 |
| ZNF284      | -0.316 | 0.287  | 0.095  | -0.456 | -0.346 | 3.52E-05 |
| CTD-2506P8  | -0.133 | -0.411 | -0.279 | -0.729 | -0.366 | 3.53E-05 |
| OBSL1       | -0.243 | 0.283  | 0.352  | 0.329  | 0.062  | 3.57E-05 |
| C12orf65    | -0.426 | -0.058 | -0.088 | 0.008  | -0.34  | 3.57E-05 |
| WASL        | 0.221  | 0.102  | -0.067 | 0.137  | 0.366  | 3.58E-05 |
| MTERFD3     | -0.45  | -0.184 | -0.079 | -0.561 | -0.608 | 3.58E-05 |
| IFT140      | -0.163 | -0.109 | 0.265  | 0.315  | 0.472  | 3.59E-05 |
| NARS        | 0.339  | 0.219  | 0.179  | 0.557  | 0.342  | 3.59E-05 |
| AC009404.2  | -0.396 | -0.28  | 0.022  | -0.927 | -0.718 | 3.59E-05 |
| RP11-480D4  | -0.353 | 0.026  | -0.078 | -0.509 | -0.406 | 3.62E-05 |

|            |        |        |        |        |        |          |
|------------|--------|--------|--------|--------|--------|----------|
| RP11-598F1 | 0.433  | 0.019  | -0.093 | 0.346  | 0.347  | 3.63E-05 |
| TNPO1P1    | -0.028 | -0.261 | -0.168 | -0.092 | -0.608 | 3.65E-05 |
| APEH       | 0.126  | 0.046  | 0.01   | 0.264  | 0.376  | 3.67E-05 |
| ATAD1      | 0.013  | 0.233  | 0.2    | 0.124  | 0.35   | 3.73E-05 |
| PLD6       | -0.817 | -0.319 | -0.174 | -0.471 | -0.725 | 3.74E-05 |
| FAM102A    | 0.231  | 0.155  | -0.001 | -0.323 | 0.307  | 3.75E-05 |
| CSTF3      | 0.037  | 0.318  | 0.229  | 0.362  | 0.091  | 3.75E-05 |
| AC068302.3 | -0.587 | -0.222 | -0.382 | -1.248 | -1.016 | 3.75E-05 |
| LGALS3BP   | 0.184  | -0.146 | -0.184 | 0.135  | 0.551  | 3.76E-05 |
| COPB2      | 0.489  | 0.217  | 0.1    | 0.541  | 0.51   | 3.76E-05 |
| ZBED8      | -0.742 | -0.107 | -0.111 | -0.257 | -0.543 | 3.78E-05 |
| UBAP1L     | -0.127 | -0.023 | -0.004 | -1.089 | -0.759 | 3.79E-05 |
| RP11-10E18 | -0.501 | -0.525 | -0.11  | -0.559 | -0.933 | 3.80E-05 |
| ARHGAP39   | -0.471 | -0.17  | 0.046  | -0.111 | 0.245  | 3.81E-05 |
| GOLIM4     | 0.443  | 0.249  | 0.063  | 0.232  | 0.229  | 3.81E-05 |
| MRPL13     | -0.177 | -0.072 | -0.024 | -0.254 | -0.586 | 3.81E-05 |
| MSN        | 0.477  | 0.139  | -0.064 | 0.279  | 0.482  | 3.82E-05 |
| RP11-159F2 | -0.335 | 0.014  | 0.093  | 0.096  | 0.205  | 3.82E-05 |
| CTD-2651C2 | 0.065  | -0.112 | 0.207  | 0.457  | 0.633  | 3.84E-05 |
| PIGA       | -0.138 | 0.16   | -0.002 | -0.186 | -0.375 | 3.85E-05 |
| ATG2A      | -0.002 | 0.343  | 0.287  | 0.226  | 0.195  | 3.86E-05 |
| C12orf73   | -0.307 | -0.119 | 0.014  | -0.376 | -0.469 | 3.86E-05 |
| MOSPD3     | -0.017 | 0.015  | 0.067  | 0.162  | 0.459  | 3.88E-05 |
| RP11-421L2 | -0.694 | -0.089 | 0.341  | -0.172 | 0.008  | 3.90E-05 |
| SNRNP35    | 0.379  | -0.004 | -0.002 | 0.291  | -0.029 | 3.90E-05 |
| DHX8       | 0.363  | 0.167  | -0.001 | 0.401  | 0.337  | 3.91E-05 |
| ICAM3      | -0.431 | -0.52  | -0.284 | -0.15  | -0.21  | 4.00E-05 |
| ARCN1      | 0.438  | 0.061  | -0.037 | 0.365  | 0.274  | 4.03E-05 |
| RP11-218F1 | -0.578 | -0.075 | 0.111  | -1.04  | -0.888 | 4.03E-05 |
| RP11-727A2 | -0.726 | -0.091 | 0.279  | -0.722 | -0.612 | 4.05E-05 |
| RP1-80B9.2 | -0.603 | -0.045 | 0.138  | 0.293  | 0.6    | 4.06E-05 |
| HEG1       | 0.283  | -0.005 | 0.015  | 0.317  | 0.349  | 4.06E-05 |
| EPOP       | 0.214  | 0.021  | -0.438 | -0.311 | 0.101  | 4.09E-05 |
| AC007191.4 | -0.538 | -0.071 | -0.048 | -0.863 | -0.701 | 4.09E-05 |
| RF01210    | -0.892 | -0.321 | -0.04  | -1.16  | -0.896 | 4.09E-05 |
| CAPNS1     | 0.344  | 0.1    | 0.083  | 0.481  | 0.398  | 4.10E-05 |
| CGRRF1     | -0.047 | -0.093 | -0.099 | -0.614 | -0.567 | 4.10E-05 |
| MBNL3      | 0.537  | 0.413  | 0.36   | 0.442  | -0.025 | 4.18E-05 |



|              |        |        |        |        |        |          |
|--------------|--------|--------|--------|--------|--------|----------|
| PRPF6        | 0.293  | 0.131  | 0.133  | 0.537  | 0.422  | 4.21E-05 |
| ANKRD10      | -0.295 | -0.049 | 0.053  | -0.556 | 0.046  | 4.21E-05 |
| RP11-66N11   | 0.454  | -0.149 | 0.219  | 0.607  | 1.132  | 4.22E-05 |
| SCAPER       | 0.031  | 0.144  | 0.333  | 0.491  | 0.327  | 4.23E-05 |
| HNMT         | -0.233 | -0.205 | -0.012 | 0.095  | 0.848  | 4.24E-05 |
| INPP1        | 0.044  | 0.072  | 0.226  | 0.346  | 0.246  | 4.26E-05 |
| IARS         | 0.29   | 0.157  | 0.14   | 0.454  | 0.283  | 4.27E-05 |
| ATP2A2       | 0.336  | 0.118  | -0.041 | 0.112  | -0.057 | 4.27E-05 |
| GPAM         | -0.082 | -0.016 | -0.052 | -0.078 | -0.403 | 4.33E-05 |
| TIA1         | -0.323 | -0.013 | 0.036  | -0.493 | 0.002  | 4.34E-05 |
| RP11-298I3.4 | -0.74  | -0.111 | 0.326  | 0.416  | 0.526  | 4.35E-05 |
| LACTB        | 0.32   | 0.185  | 0.025  | 0.373  | 0.302  | 4.36E-05 |
| RP5-1086K1   | 0.547  | -0.012 | 0.363  | 0.448  | 0.495  | 4.38E-05 |
| SPATC1L      | 0.075  | -0.002 | 0.01   | 0.319  | 0.396  | 4.38E-05 |
| BAIAP2-AS1   | -0.163 | -0.102 | 0.07   | 0.23   | 0.382  | 4.38E-05 |
| GOLGA8H      | -0.467 | -0.116 | 0.188  | -0.755 | -0.722 | 4.38E-05 |
| FZD2         | -0.346 | -0.397 | -0.666 | 0.033  | 0.411  | 4.41E-05 |
| ARF3         | 0.262  | 0.114  | 0.006  | 0.302  | 0.413  | 4.46E-05 |
| SWI5         | 0.236  | 0.027  | 0.129  | 0.328  | 0.04   | 4.46E-05 |
| ZNF100       | 0.101  | -0.092 | -0.528 | -0.42  | -0.269 | 4.50E-05 |
| SNORA1       | -0.157 | 0.054  | -0.026 | -0.817 | -0.858 | 4.52E-05 |
| LEO1         | 0.334  | 0.144  | 0.061  | 0.497  | 0.437  | 4.53E-05 |
| ZNF182       | -0.355 | 0.201  | 0.26   | -0.001 | -0.05  | 4.53E-05 |
| NUBP1        | 0.34   | 0.065  | -0.138 | 0.169  | -0.063 | 4.53E-05 |
| RHOQ         | 0.372  | 0.241  | 0.098  | 0.201  | 0.36   | 4.54E-05 |
| RP11-461N2   | -0.434 | -0.488 | -0.303 | -0.326 | -0.661 | 4.59E-05 |
| RP11-230F10  | -0.922 | -0.426 | -0.146 | -1.193 | -0.9   | 4.60E-05 |
| PCDHGA11     | 0.165  | -0.065 | -0.187 | 0.232  | 0.365  | 4.61E-05 |
| RAD23B       | 0.356  | 0.062  | -0.061 | 0.21   | 0.114  | 4.64E-05 |
| GBE1         | 0.526  | 0.315  | 0.215  | 0.544  | 0.507  | 4.68E-05 |
| PHC1         | -0.225 | -0.014 | 0.132  | -0.456 | -0.363 | 4.74E-05 |
| RP1-205F14   | -0.101 | 0.495  | 0.514  | 0.609  | 1.266  | 4.75E-05 |
| RP11-1148L0  | -0.039 | -0.24  | -0.135 | -0.403 | 0.305  | 4.78E-05 |
| ZNF316       | -0.25  | 0.07   | -0.039 | -0.446 | 0.04   | 4.79E-05 |
| OIP5         | -0.511 | -0.642 | -0.299 | -0.11  | -0.59  | 4.84E-05 |
| RP11-359K1   | -0.324 | -0.034 | 0.514  | -0.345 | -0.435 | 4.85E-05 |
| RF01892      | -0.543 | 0.092  | 0.104  | -0.824 | -0.562 | 4.87E-05 |
| TTLL1        | 0.112  | -0.067 | 0.004  | 0.447  | 0.396  | 4.90E-05 |

|             |        |        |        |        |        |          |
|-------------|--------|--------|--------|--------|--------|----------|
| DTNA        | -0.049 | 0.2    | 0.408  | 0.246  | 0.789  | 4.92E-05 |
| IWS1        | 0.111  | 0.103  | 0.155  | 0.363  | 0.104  | 4.93E-05 |
| CCDC58      | -0.289 | -0.13  | -0.085 | -0.514 | -0.646 | 4.94E-05 |
| STX5        | 0.401  | 0.333  | 0.241  | 0.416  | 0.403  | 4.97E-05 |
| ZNF787      | 0.238  | -0.15  | -0.135 | 0.131  | 0.337  | 4.97E-05 |
| ZNF860      | -0.527 | 0.302  | 0.41   | 0.28   | 0.209  | 4.98E-05 |
| AC006132.1  | -1.141 | -0.719 | -0.262 | -0.352 | 0.01   | 4.98E-05 |
| RP11-308D1  | 0.433  | -0.207 | -0.275 | -0.056 | -0.061 | 4.99E-05 |
| RP5-902P8.1 | -0.716 | 0.117  | 0.666  | 0.126  | 0.521  | 5.02E-05 |
| RP11-778J16 | 0.394  | 0.13   | 0.031  | 0.505  | 0.42   | 5.02E-05 |
| PSMA4       | -0.081 | -0.016 | -0.006 | -0.085 | -0.415 | 5.03E-05 |
| RP11-392E2  | -0.411 | -0.073 | 0.352  | -0.66  | -0.808 | 5.03E-05 |
| PA2G4P4     | 0.379  | 0.116  | 0.04   | 0.483  | -0.065 | 5.05E-05 |
| AADAT       | -0.093 | 0.09   | -0.087 | -0.739 | -0.185 | 5.06E-05 |
| RP11-152C1  | -0.294 | -0.344 | -0.228 | -0.211 | -0.681 | 5.11E-05 |
| HNRNPH2     | 0.501  | 0.211  | 0.036  | 0.525  | 0.387  | 5.12E-05 |
| RP11-387H1  | -0.963 | -0.127 | 0.456  | -0.135 | 0.266  | 5.13E-05 |
| BOLA1       | -0.45  | -0.081 | 0.153  | 0.025  | -0.417 | 5.13E-05 |
| LY96        | -0.405 | -0.18  | 0.077  | -0.18  | 0.365  | 5.18E-05 |
| PAAF1       | 0.06   | 0.011  | 0.058  | 0.464  | 0.226  | 5.20E-05 |
| RP11-566K1  | 0.435  | -0.004 | -0.432 | -0.362 | -0.234 | 5.21E-05 |
| C19orf57    | 0.032  | 0.489  | 0.212  | -0.131 | -0.84  | 5.21E-05 |
| NAA38       | -0.126 | -0.217 | -0.139 | -0.19  | -0.4   | 5.26E-05 |
| MCM3APAS    | -0.866 | -0.101 | 0.27   | -0.282 | -0.345 | 5.27E-05 |
| MRPL50      | -0.213 | -0.105 | -0.187 | -0.336 | -0.515 | 5.27E-05 |
| NSDHL       | 0.412  | -0.123 | -0.158 | 0.102  | 0.164  | 5.30E-05 |
| FBXL12      | 0.411  | 0.145  | -0.02  | -0.058 | 0.097  | 5.30E-05 |
| PFDN4       | -0.328 | -0.041 | -0.123 | -0.702 | -0.573 | 5.31E-05 |
| RP11-98L4.1 | 0.338  | -0.199 | -0.122 | 0.055  | -0.182 | 5.32E-05 |
| COX7A2P2    | -0.473 | -0.308 | -0.111 | -0.664 | -0.74  | 5.36E-05 |
| KIAA1841    | 0.111  | 0.069  | 0.129  | -0.099 | 0.324  | 5.37E-05 |
| TMEM141     | -0.333 | -0.128 | 0.014  | -0.217 | -0.566 | 5.40E-05 |
| ACOT7       | 0.379  | 0.041  | -0.101 | 0.325  | 0.391  | 5.41E-05 |
| CCT7        | 0.375  | 0.109  | -0.039 | 0.363  | 0.277  | 5.42E-05 |
| SSSCA1      | 0.008  | -0.028 | 0.003  | 0.058  | -0.358 | 5.46E-05 |
| RP11-37B2.1 | -0.296 | 0.438  | 0.267  | -0.68  | 0.007  | 5.48E-05 |
| NOSIP       | 0.21   | 0.089  | 0.004  | 0.347  | 0.306  | 5.49E-05 |
| RP11-723J4. | -0.514 | -0.085 | 0.02   | -0.799 | -0.872 | 5.50E-05 |

|            |        |        |        |        |        |          |
|------------|--------|--------|--------|--------|--------|----------|
| ZHX2       | 0.123  | 0.081  | -0.092 | 0.067  | 0.577  | 5.53E-05 |
| CCT6P1     | -0.349 | 0.05   | 0.082  | -0.694 | -0.394 | 5.54E-05 |
| NPRL2      | -0.286 | -0.052 | -0.028 | -0.238 | -0.366 | 5.57E-05 |
| RP5-1037N2 | -0.484 | -0.205 | -0.373 | -0.972 | -0.934 | 5.59E-05 |
| WBP11      | 0.357  | 0.154  | -0.089 | 0.135  | -0.134 | 5.60E-05 |
| PIGT       | 0.172  | 0.045  | -0.063 | 0.28   | 0.363  | 5.63E-05 |
| FAM172A    | 0.389  | 0.102  | 0.033  | 0.318  | 0.164  | 5.63E-05 |
| FAM212A    | -0.471 | -0.272 | -0.351 | -0.286 | 0.097  | 5.66E-05 |
| RP11-297L1 | 0.352  | -0.064 | -0.043 | 0.285  | 0.013  | 5.66E-05 |
| RAB13      | -0.528 | -0.108 | 0.077  | -0.552 | -0.201 | 5.67E-05 |
| C12orf45   | -0.082 | 0.113  | 0.229  | -0.388 | -0.266 | 5.67E-05 |
| ZNF639     | -0.101 | -0.237 | -0.27  | -0.261 | -0.344 | 5.67E-05 |
| SAP30      | -0.249 | -0.185 | -0.364 | 0.144  | 0.086  | 5.68E-05 |
| CTD-2561B2 | 0.352  | 0.558  | 0.575  | 0.82   | 1.189  | 5.69E-05 |
| ANXA7      | 0.249  | 0.176  | 0.099  | 0.348  | 0.015  | 5.69E-05 |
| AKAP13     | -0.059 | -0.215 | -0.229 | -0.504 | -0.11  | 5.69E-05 |
| TMEM88     | -0.557 | -0.635 | -0.585 | -0.505 | -0.627 | 5.70E-05 |
| GEMIN4     | 0.128  | -0.097 | -0.25  | 0.002  | -0.44  | 5.72E-05 |
| CTD-2037K2 | -0.355 | 0.007  | -0.04  | -0.35  | -0.679 | 5.75E-05 |
| HSD17B4    | 0.409  | 0.231  | 0.228  | 0.619  | 0.491  | 5.81E-05 |
| RP11-255A1 | -0.346 | 0.097  | 0.001  | -0.634 | -0.99  | 5.82E-05 |
| CCDC126    | -0.256 | 0.087  | -0.09  | -0.424 | -0.397 | 5.84E-05 |
| TMEM18     | -0.252 | -0.173 | -0.193 | -0.434 | -0.476 | 5.87E-05 |
| CNOT11     | 0.157  | 0.188  | 0.181  | 0.371  | 0.309  | 5.90E-05 |
| PAPSS1     | 0.378  | 0.034  | -0.16  | 0.178  | 0.113  | 5.90E-05 |
| DIMT1      | -0.037 | -0.142 | -0.149 | -0.297 | -0.45  | 5.91E-05 |
| C17orf53   | -0.05  | -0.054 | -0.16  | -0.305 | -0.626 | 5.92E-05 |
| WDR5B      | -0.453 | 0.006  | -0.049 | -0.155 | -0.404 | 5.96E-05 |
| RP11-302F1 | -0.592 | -0.194 | -0.27  | -1.047 | -0.754 | 5.96E-05 |
| ZNHIT2     | -0.478 | -0.088 | -0.16  | 0.15   | 0.302  | 5.98E-05 |
| SERBP1     | 0.413  | 0.119  | -0.016 | 0.384  | 0.212  | 5.98E-05 |
| KRT8P12    | -0.521 | -0.247 | -0.102 | -0.313 | -0.913 | 5.98E-05 |
| SORBS2     | 0.1    | -0.259 | -0.419 | -0.115 | -0.194 | 6.00E-05 |
| MBTD1      | -0.336 | 0.113  | -0.051 | -0.285 | 0.058  | 6.01E-05 |
| SATB1      | -0.002 | -0.11  | -0.296 | -0.766 | -0.446 | 6.01E-05 |
| SMARCB1    | 0.36   | 0.023  | -0.172 | 0.252  | 0.179  | 6.05E-05 |
| CDK12      | 0.372  | 0.16   | 0.006  | 0.208  | 0.164  | 6.05E-05 |
| RP11-141J1 | -0.309 | -0.431 | -0.151 | -0.615 | -0.829 | 6.05E-05 |

|            |        |        |        |        |        |          |
|------------|--------|--------|--------|--------|--------|----------|
| ZNF605     | -0.145 | 0.036  | 0.16   | 0.024  | 0.359  | 6.06E-05 |
| IFT88      | 0.148  | 0.023  | 0.374  | 0.366  | 0.368  | 6.07E-05 |
| ACTR2      | 0.439  | 0.17   | 0.029  | 0.394  | 0.363  | 6.08E-05 |
| CAAP1      | 0.167  | 0.14   | 0.174  | 0.445  | 0.422  | 6.10E-05 |
| PIGC       | -0.186 | -0.219 | -0.254 | -0.244 | -0.592 | 6.10E-05 |
| RP3-324O17 | -0.136 | -0.08  | 0.115  | -0.807 | -0.927 | 6.10E-05 |
| IMPDH2     | 0.273  | 0.145  | 0.129  | 0.37   | 0.212  | 6.12E-05 |
| NKX3-1     | 0.943  | 0.61   | 0.354  | 0.398  | 0.908  | 6.14E-05 |
| OGFOD2     | -0.217 | 0.283  | 0.181  | -0.172 | -0.429 | 6.17E-05 |
| DDX17      | -0.467 | -0.131 | -0.002 | -0.307 | -0.257 | 6.20E-05 |
| RP11-151N1 | -0.599 | -0.121 | 0.062  | -0.383 | -0.424 | 6.24E-05 |
| RP1-178F15 | -0.375 | 0.292  | 0.375  | -0.119 | 0.041  | 6.27E-05 |
| AC009133.1 | -0.098 | 0.274  | 0.523  | 0.07   | 0.871  | 6.28E-05 |
| ADGRE5     | -0.392 | -0.324 | -0.179 | -0.268 | -0.135 | 6.32E-05 |
| C1orf56    | -0.037 | 0.001  | -0.143 | 0.567  | 0.488  | 6.35E-05 |
| HSP90B1    | 0.365  | 0.187  | 0.038  | 0.398  | 0.06   | 6.37E-05 |
| ERH        | -0.098 | -0.18  | -0.108 | -0.277 | -0.406 | 6.37E-05 |
| TIMM8B     | -0.31  | -0.238 | -0.101 | -0.418 | -0.609 | 6.37E-05 |
| KIAA1429   | 0.269  | 0.271  | 0.198  | 0.423  | 0.371  | 6.39E-05 |
| MRPS18C    | -0.21  | -0.057 | 0.044  | -0.254 | -0.588 | 6.39E-05 |
| LYRM2      | -0.128 | -0.114 | -0.116 | -0.158 | -0.393 | 6.50E-05 |
| ENDOV      | -0.074 | 0.063  | 0.335  | 0.386  | 0.37   | 6.54E-05 |
| ATG4C      | -0.173 | -0.155 | -0.06  | 0.173  | -0.384 | 6.56E-05 |
| CCDC61     | -0.261 | -0.114 | -0.012 | -0.164 | -0.53  | 6.56E-05 |
| RP11-267N1 | -0.678 | -0.093 | 0.188  | -0.089 | -0.553 | 6.56E-05 |
| AC011816.3 | -0.063 | -0.109 | -0.282 | -0.165 | -1.131 | 6.62E-05 |
| LA16c-349E | -0.626 | 0.128  | 0.231  | -0.671 | -0.278 | 6.66E-05 |
| L3MBTL1    | -0.835 | 0.043  | 0.079  | -0.457 | -0.201 | 6.67E-05 |
| B4GALT4    | 0.068  | 0.138  | 0.038  | -0.17  | -0.334 | 6.69E-05 |
| CROCCP3    | -0.598 | -0.22  | 0.276  | -0.644 | -0.525 | 6.70E-05 |
| NR1H3      | -0.371 | -0.18  | 0.13   | 0.037  | -0.731 | 6.71E-05 |
| DHX58      | -0.246 | 0.283  | 0.357  | -0.049 | 0.386  | 6.72E-05 |
| NIFK-AS1   | -0.931 | -0.443 | -0.218 | -0.236 | -0.35  | 6.72E-05 |
| COX10-AS1  | -0.623 | -0.334 | -0.012 | -0.575 | -0.231 | 6.74E-05 |
| KCTD6      | 0.034  | -0.025 | -0.112 | -0.431 | -0.643 | 6.74E-05 |
| RP11-576D8 | -0.141 | 0.044  | 0.142  | -0.448 | -0.654 | 6.78E-05 |
| BXDC1P     | -0.056 | -0.306 | -0.34  | -0.287 | -0.687 | 6.78E-05 |
| PILRA      | -0.547 | 0.099  | 0.33   | -0.511 | -0.553 | 6.81E-05 |

|             |        |        |        |        |        |          |
|-------------|--------|--------|--------|--------|--------|----------|
| MRPL19      | 0.251  | 0.073  | -0.053 | 0.335  | 0.123  | 6.82E-05 |
| CEBPD       | -0.047 | -0.125 | -0.635 | -0.682 | -0.16  | 6.82E-05 |
| ZNF589      | -0.17  | -0.018 | -0.025 | -0.228 | -0.429 | 6.83E-05 |
| RP11-325K4  | -0.41  | 0.175  | 0.103  | -0.788 | -0.825 | 6.85E-05 |
| RP11-407G2  | 0.079  | 0.256  | 0.35   | -0.642 | -0.505 | 6.94E-05 |
| RP11-807H7  | 0.188  | -0.04  | -0.565 | -0.642 | -1.011 | 6.97E-05 |
| AC004049.2  | -0.198 | -0.154 | -0.187 | -0.301 | -1.04  | 6.97E-05 |
| SNORD73A    | -0.213 | 0.28   | 0.206  | -0.532 | -0.65  | 6.98E-05 |
| RP11-332H1  | 0.071  | 0.107  | 0.368  | -0.305 | -0.719 | 7.00E-05 |
| NTPCR       | 0.043  | 0.079  | 0.302  | 0.309  | 0.485  | 7.01E-05 |
| RGS7        | 0.406  | -0.235 | 0.108  | 0.261  | 0.116  | 7.01E-05 |
| RP11-33B1.1 | -0.482 | 0.08   | 0.243  | -0.505 | -0.226 | 7.01E-05 |
| SLC2A4RG    | -0.209 | -0.242 | -0.285 | -0.345 | -0.293 | 7.04E-05 |
| RP11-624L4. | -0.364 | -0.082 | -0.346 | -0.505 | -0.705 | 7.08E-05 |
| APBA3       | -0.017 | 0.382  | 0.215  | 0.039  | 0.146  | 7.09E-05 |
| GPS2        | -0.339 | 0.229  | -0.061 | -0.152 | 0.946  | 7.10E-05 |
| LRPPRC      | 0.389  | 0.256  | 0.1    | 0.433  | 0.499  | 7.10E-05 |
| ZNF407      | 0.334  | 0.334  | 0.382  | 0.482  | 0.348  | 7.11E-05 |
| SNORA51     | -0.25  | -0.391 | -0.139 | -0.895 | -1.103 | 7.11E-05 |
| SERTAD2     | 0.489  | 0.267  | 0.289  | 0.344  | 0.24   | 7.13E-05 |
| ZBTB7A      | 0.178  | 0.088  | 0.033  | 0.076  | 0.386  | 7.14E-05 |
| SSB         | 0.362  | 0.242  | 0.073  | 0.432  | 0.24   | 7.26E-05 |
| RP13-507I23 | -0.672 | -0.025 | 0.399  | -0.463 | 0.013  | 7.33E-05 |
| ZW10        | 0.37   | 0.185  | 0.061  | 0.385  | -0.064 | 7.36E-05 |
| ZNF559      | -0.378 | 0.062  | 0.049  | -0.241 | -0.101 | 7.37E-05 |
| AATK        | -0.079 | 0.012  | 0.5    | 0.509  | 0.116  | 7.38E-05 |
| UBXN8       | -0.177 | -0.204 | -0.056 | -0.19  | -0.541 | 7.39E-05 |
| CCM2        | 0.091  | 0.002  | 0.038  | 0.196  | 0.35   | 7.41E-05 |
| RP11-153M7  | 0.247  | 0.102  | 0.311  | 0.554  | 0.838  | 7.45E-05 |
| ARID5A      | 0.337  | 0.091  | 0.026  | 0.128  | 0.489  | 7.45E-05 |
| SSTR1       | -0.077 | 0.213  | 0.177  | 0.516  | 0.42   | 7.45E-05 |
| CTD-2547E1  | -0.468 | -0.127 | -0.132 | -1.101 | -0.673 | 7.45E-05 |
| SNAPIN      | -0.37  | -0.252 | -0.048 | -0.151 | -0.402 | 7.48E-05 |
| SLC19A1     | -0.046 | -0.156 | -0.019 | 0.334  | -0.131 | 7.49E-05 |
| PHF6        | 0.078  | 0.143  | 0.095  | 0.294  | 0.388  | 7.50E-05 |
| CCT3        | 0.329  | 0.11   | 0.056  | 0.439  | 0.298  | 7.51E-05 |
| ARFIP1      | 0.322  | 0.202  | 0.083  | 0.418  | 0.282  | 7.51E-05 |
| ZKSCAN2     | 0.45   | 0.352  | 0.178  | 0.391  | 0.176  | 7.51E-05 |

|            |        |        |        |        |        |          |
|------------|--------|--------|--------|--------|--------|----------|
| AC084219.4 | -0.697 | -0.09  | -0.011 | 0.024  | 0.342  | 7.56E-05 |
| SNORD58A   | -0.009 | 0.146  | 0.238  | -0.72  | -0.805 | 7.60E-05 |
| PPP2R1A    | 0.398  | 0.061  | -0.053 | 0.321  | 0.464  | 7.61E-05 |
| RP5-1009N1 | 0.15   | -0.163 | -0.17  | 0.016  | -0.649 | 7.62E-05 |
| CYB5R3     | 0.279  | 0.097  | 0.002  | 0.425  | 0.393  | 7.63E-05 |
| RCAN1      | -0.119 | 0.176  | 0.079  | 0.115  | 0.421  | 7.64E-05 |
| MROH6      | -0.107 | 0.26   | 0.094  | -0.725 | -0.507 | 7.64E-05 |
| KCTD11     | 0.421  | 0.442  | 0.268  | 0.137  | 0.366  | 7.65E-05 |
| RP11-392E2 | -0.168 | -0.312 | -0.252 | -0.957 | -1.204 | 7.66E-05 |
| ZNF354B    | -0.298 | 0.186  | -0.076 | -0.652 | -0.416 | 7.67E-05 |
| MIR4292    | -0.098 | 0.141  | -0.085 | -0.953 | -0.766 | 7.69E-05 |
| CUZD1      | -0.656 | 0.029  | 0.347  | -0.484 | -0.182 | 7.71E-05 |
| CEP57L1    | -0.451 | -0.116 | -0.099 | -0.343 | -0.391 | 7.71E-05 |
| RP11-706O1 | -0.21  | -0.157 | -0.292 | -0.696 | 0.042  | 7.72E-05 |
| CHST12     | 0.064  | -0.182 | -0.37  | -0.064 | 0.015  | 7.79E-05 |
| PGBD2      | 0.082  | 0.37   | 0.456  | -0.144 | -0.042 | 7.79E-05 |
| FAM27B     | -0.61  | 0.104  | 0.089  | 0.033  | -0.751 | 7.83E-05 |
| RPL7L1     | 0.329  | 0.122  | 0.046  | 0.288  | 0.121  | 7.84E-05 |
| TCEAL7     | 0.168  | 0.077  | 0.121  | 0.162  | 0.948  | 7.87E-05 |
| CHP1       | 0.299  | 0.106  | 0.049  | 0.317  | 0.41   | 7.89E-05 |
| CCT6P3     | -0.525 | -0.022 | 0.047  | -0.805 | -0.437 | 7.90E-05 |
| GHR        | -0.084 | -0.292 | -0.337 | -0.348 | -0.642 | 7.90E-05 |
| CTD-2033A1 | 0.334  | -0.023 | -0.037 | 0.33   | 0.343  | 7.92E-05 |
| SNORD60    | 0.204  | 0.301  | 0.161  | -0.401 | -0.887 | 7.93E-05 |
| CD99L2     | 0.235  | 0.068  | 0.016  | 0.332  | 0.379  | 7.97E-05 |
| AF196972.4 | 0.49   | -0.094 | -0.102 | 0.169  | 0.26   | 8.00E-05 |
| SUPT16H    | 0.393  | 0.131  | -0.05  | 0.281  | -0.071 | 8.00E-05 |
| C19orf70   | -0.305 | -0.274 | -0.17  | -0.311 | -0.429 | 8.20E-05 |
| C3orf62    | 0.065  | 0.292  | 0.538  | -0.077 | 0.152  | 8.22E-05 |
| SDHAP3     | -0.476 | 0.034  | -0.064 | -0.516 | -0.457 | 8.27E-05 |
| ZNF581     | -0.035 | 0.056  | 0.064  | 0.184  | 0.389  | 8.28E-05 |
| LINC00467  | -0.103 | -0.045 | 0.186  | 0.236  | -0.599 | 8.28E-05 |
| HCN3       | -0.135 | -0.274 | 0.035  | -0.749 | -0.713 | 8.28E-05 |
| MIR155HG   | -0.578 | -0.19  | -0.189 | -0.837 | -0.724 | 8.32E-05 |
| RP11-686D2 | -0.514 | 0.24   | 0.26   | -0.251 | 0.126  | 8.34E-05 |
| MSNP1      | 0.445  | -0.054 | -0.13  | 0.176  | 0.359  | 8.36E-05 |
| MKRN2      | 0.336  | 0.078  | -0.035 | 0.113  | 0.187  | 8.40E-05 |
| NBR2       | -0.467 | 0.255  | 0.273  | -0.083 | -0.039 | 8.40E-05 |

|              |        |        |        |        |        |          |
|--------------|--------|--------|--------|--------|--------|----------|
| FECH         | 0.228  | 0.193  | 0.155  | 0.329  | 0.27   | 8.45E-05 |
| MUT          | 0.268  | 0.167  | 0.089  | 0.371  | 0.165  | 8.52E-05 |
| PDDC1        | -0.303 | -0.103 | 0.012  | -0.339 | -0.286 | 8.54E-05 |
| RP3-508I15.1 | -0.035 | 0.39   | 0.243  | -0.717 | -0.661 | 8.54E-05 |
| RP11-32B5.1  | 0.392  | 0.149  | 0.091  | 0.328  | 0.47   | 8.55E-05 |
| SEZ6L2       | 0.163  | 0.024  | 0.041  | 0.474  | 0.658  | 8.57E-05 |
| DDAH1        | 0.214  | 0.121  | 0.199  | 0.454  | 0.284  | 8.57E-05 |
| RP11-192H2   | -0.877 | -0.345 | -0.157 | -0.912 | -0.886 | 8.58E-05 |
| ATP5B        | 0.35   | 0.08   | -0.023 | 0.362  | 0.233  | 8.63E-05 |
| PRMT7        | -0.177 | -0.147 | -0.171 | -0.231 | -0.399 | 8.63E-05 |
| GNB1L        | -0.075 | -0.364 | 0.071  | 0.502  | 0.123  | 8.67E-05 |
| RP11-332L11  | 0.253  | -0.401 | -0.353 | 0.19   | -0.171 | 8.68E-05 |
| C20orf96     | -0.411 | -0.222 | -0.064 | -0.408 | 0.126  | 8.70E-05 |
| IPP          | -0.048 | 0.233  | 0.261  | 0.497  | 0.146  | 8.71E-05 |
| RP11-550E2   | -1.124 | -0.051 | 0.148  | -0.577 | -0.526 | 8.73E-05 |
| TIMP1        | 0.229  | 0.002  | -0.048 | 0.341  | 0.108  | 8.76E-05 |
| HOXA-AS2     | -0.375 | 0.117  | 0.482  | 0.076  | 0.419  | 8.78E-05 |
| FOXK2        | 0.123  | -0.006 | -0.1   | 0.109  | 0.41   | 8.78E-05 |
| USP8         | 0.285  | 0.179  | 0.11   | 0.312  | 0.373  | 8.78E-05 |
| CEND1        | -0.034 | -0.168 | -0.208 | 0.084  | -0.639 | 8.79E-05 |
| RPL32P3      | -0.454 | -0.011 | 0.164  | -0.576 | -0.296 | 8.80E-05 |
| RPP38        | -0.01  | 0.057  | 0.024  | 0.084  | -0.426 | 8.80E-05 |
| RP11-161I2.1 | -0.092 | -0.091 | 0.226  | 0.359  | 0.929  | 8.92E-05 |
| PELO         | 0.424  | 0.125  | 0.127  | 0.359  | 0.102  | 8.93E-05 |
| ST7L         | -0.197 | -0.124 | 0.067  | -0.257 | -0.362 | 8.93E-05 |
| RARS         | 0.368  | 0.245  | 0.144  | 0.468  | 0.303  | 8.99E-05 |
| RP11-5A19.5  | -0.73  | -0.049 | 0.091  | -0.535 | -0.661 | 9.00E-05 |
| SNORD38B     | -0.436 | -0.22  | -0.001 | -0.868 | -0.965 | 9.00E-05 |
| DENND4A      | 0.011  | 0.126  | 0.169  | 0.325  | 0.291  | 9.01E-05 |
| LL22NC03-80  | -0.225 | 0.046  | 0.118  | -0.383 | -0.297 | 9.03E-05 |
| CHCHD4       | -0.136 | -0.111 | -0.104 | 0.071  | -0.444 | 9.05E-05 |
| CDK2AP2      | 0.159  | -0.081 | -0.08  | 0.044  | -0.386 | 9.11E-05 |
| PCBP1        | 0.355  | -0.017 | -0.016 | 0.441  | 0.137  | 9.21E-05 |
| RALY         | 0.328  | 0.119  | -0.018 | 0.222  | 0.308  | 9.22E-05 |
| AC000110.1   | -0.542 | -0.399 | -0.288 | -0.473 | -0.743 | 9.22E-05 |
| BTBD19       | 0.17   | 0.025  | 0.32   | -0.584 | 0.021  | 9.25E-05 |
| RP11-934B9   | -0.105 | -0.239 | 0.193  | -0.697 | -0.429 | 9.28E-05 |
| FAM120C      | -0.444 | -0.305 | 0.03   | -0.242 | -0.236 | 9.29E-05 |

|             |        |        |        |        |        |          |
|-------------|--------|--------|--------|--------|--------|----------|
| KIAA0391    | -0.185 | 0.101  | 0.351  | -0.362 | 0.027  | 9.33E-05 |
| RP11-51L5.2 | -0.238 | -0.345 | -0.259 | -0.392 | -0.472 | 9.33E-05 |
| RP11-338K1  | -0.299 | 0.237  | 0.489  | -0.661 | -0.591 | 9.36E-05 |
| RP11-223F2  | 0.33   | 0.045  | 0.129  | 0.5    | 0.141  | 9.38E-05 |
| MIR590      | 0.1    | 0.413  | 0.433  | -0.644 | -0.415 | 9.38E-05 |
| YIPF3       | 0.184  | 0.048  | -0.045 | 0.254  | 0.348  | 9.39E-05 |
| ANKRD9      | -0.125 | -0.077 | -0.089 | -0.244 | 0.322  | 9.39E-05 |
| PSMD3       | 0.367  | 0.234  | 0.113  | 0.378  | -0.065 | 9.44E-05 |
| AGL         | 0.115  | 0.306  | 0.198  | 0.401  | 0.103  | 9.51E-05 |
| KRT10       | -0.211 | -0.237 | -0.19  | -0.606 | -0.583 | 9.64E-05 |
| SLC9A3      | -0.655 | -0.415 | -0.671 | -0.738 | -0.745 | 9.78E-05 |
| BLVRA       | 0.237  | 0.084  | 0.039  | 0.362  | 0.345  | 9.81E-05 |
| RP11-265B8  | 0.515  | 0.283  | 0.212  | 0.397  | 0.991  | 9.86E-05 |
| BRMS1L      | 0.493  | 0.382  | 0.305  | 0.388  | 0.372  | 9.86E-05 |
| NDFIP2      | -0.146 | -0.115 | -0.111 | -0.23  | -0.635 | 9.87E-05 |
| ADAM32      | 0.017  | 0.323  | 0.128  | -0.441 | -0.838 | 9.92E-05 |
| MYOF        | 0.344  | 0.089  | 0.075  | 0.424  | 0.447  | 9.95E-05 |
| TUBB2A      | 0.408  | 0.286  | 0.08   | 0.448  | -0.088 | 9.96E-05 |
| KIF1C       | -0.409 | -0.173 | -0.018 | -0.597 | -0.343 | 9.96E-05 |
| KDM5A       | 0.181  | 0.288  | 0.16   | 0.312  | 0.323  | 0.0001   |
| KAT2A       | -0.41  | -0.23  | -0.035 | -0.376 | -0.313 | 0.0001   |
| CENPB       | -0.091 | -0.264 | -0.205 | -0.404 | -0.295 | 0.000101 |
| WDR53       | 0.076  | 0.083  | -0.079 | -0.165 | -0.399 | 0.000101 |
| MIR6835     | -1.05  | 0.05   | -0.064 | -0.553 | -0.858 | 0.000101 |
| RP5-827C21  | -0.276 | -0.15  | 0.14   | -0.664 | -0.997 | 0.000101 |
| RP11-877E1  | -0.269 | 0.107  | 0.47   | 0.006  | 0.458  | 0.000102 |
| SGMS2       | 0.389  | 0.084  | 0.049  | 0.301  | 0.195  | 0.000102 |
| AC098614.2  | 0.353  | -0.004 | -0.078 | 0.107  | 0.146  | 0.000102 |
| ICT1        | -0.161 | -0.157 | -0.053 | -0.116 | -0.555 | 0.000102 |
| LL0XNC01-7  | -0.668 | -0.035 | -0.024 | -0.784 | -0.839 | 0.000102 |
| RP11-792D2  | -0.063 | -0.317 | -0.312 | -0.354 | 0.513  | 0.000104 |
| APC         | 0.145  | 0.093  | 0.093  | 0.172  | 0.336  | 0.000104 |
| PBDC1       | 0.39   | 0.109  | 0.001  | 0.247  | 0.212  | 0.000104 |
| EIF1B       | -0.166 | 0.042  | -0.005 | -0.143 | -0.394 | 0.000104 |
| LAP3        | 0.336  | 0.136  | 0.016  | 0.433  | 0.392  | 0.000105 |
| CPSF2       | 0.276  | 0.119  | 0.083  | 0.427  | 0.213  | 0.000106 |
| COL4A1      | 0.437  | 0.124  | -0.181 | 0.19   | -0.051 | 0.000106 |
| TM2D2       | -0.146 | -0.114 | -0.188 | -0.16  | -0.33  | 0.000106 |



|             |        |        |        |        |        |          |
|-------------|--------|--------|--------|--------|--------|----------|
| CTD-2165H1  | 0.199  | 0.202  | 0.416  | 0.372  | 0.742  | 0.000107 |
| TULP3       | 0.249  | 0.163  | 0.049  | 0.13   | 0.359  | 0.000107 |
| HLCS        | 0.242  | 0.07   | 0.081  | 0.33   | -0.022 | 0.000107 |
| KIF4B       | -0.135 | -0.686 | -0.498 | 0.057  | -0.239 | 0.000108 |
| FAM72D      | -0.616 | -0.545 | -0.575 | 0.235  | -0.434 | 0.000108 |
| PIN4        | 0.04   | 0.104  | 0.227  | 0.151  | 0.461  | 0.000109 |
| AC012354.8  | 0.052  | -0.317 | -0.173 | -0.093 | -0.446 | 0.000109 |
| RP11-342K6  | 0.343  | 0.081  | 0.002  | 0.386  | 0.536  | 0.00011  |
| CCDC80      | 0.045  | 0.111  | 0.08   | 0.419  | 0.365  | 0.000111 |
| UQCRC1      | 0.27   | 0.083  | 0.023  | 0.376  | 0.326  | 0.000111 |
| RP11-783K1  | -0.379 | 0.118  | 0.189  | -0.349 | -0.446 | 0.000111 |
| RDH14       | -0.081 | 0.073  | 0.118  | 0.094  | 0.387  | 0.000112 |
| UBQLN1      | 0.408  | 0.179  | -0.079 | 0.206  | 0.119  | 0.000112 |
| ITGAE       | -0.466 | -0.183 | -0.025 | -0.588 | -0.667 | 0.000112 |
| TCTN2       | -0.073 | -0.073 | -0.068 | 0.27   | 0.415  | 0.000113 |
| PTTG2       | -0.42  | -0.756 | -0.521 | -0.499 | -0.028 | 0.000113 |
| NUDT16      | -0.573 | -0.347 | -0.138 | -0.572 | -0.367 | 0.000113 |
| RP11-757F11 | 0.819  | 0.693  | 1.136  | 0.305  | 0.978  | 0.000114 |
| SND1        | 0.473  | 0.155  | 0.036  | 0.43   | 0.494  | 0.000114 |
| RP11-642N1  | 0.261  | 0.119  | 0.178  | 0.451  | 0.122  | 0.000115 |
| ADCY4       | -0.102 | 0      | 0.163  | -0.451 | 0.019  | 0.000115 |
| TMEM170A    | -0.148 | 0.088  | 0.012  | -0.341 | -0.18  | 0.000116 |
| OTUD6B      | -0.203 | -0.089 | -0.178 | -0.122 | -0.356 | 0.000117 |
| RPS28       | -0.32  | -0.156 | -0.244 | -0.84  | -0.542 | 0.000117 |
| RAD50       | 0.039  | 0.119  | 0.198  | 0.581  | 0.404  | 0.000118 |
| SSH3        | -0.185 | 0.031  | -0.067 | -0.293 | -0.435 | 0.000118 |
| MRPS36      | -0.062 | -0.009 | 0.044  | -0.136 | -0.507 | 0.000118 |
| C17orf89    | -0.094 | 0.081  | 0.242  | 0.159  | 0.532  | 0.000119 |
| SPA17       | -0.376 | -0.064 | -0.142 | 0.208  | 0.239  | 0.000119 |
| EIF3B       | 0.366  | 0.112  | -0.007 | 0.301  | 0.335  | 0.00012  |
| MALT1       | 0.263  | 0.336  | 0.169  | 0.069  | -0.015 | 0.00012  |
| CDC42EP1    | 0.355  | -0.162 | -0.203 | 0.102  | 0.114  | 0.000121 |
| SNORA11F    | -0.282 | -0.099 | -0.335 | -0.827 | -0.952 | 0.000121 |
| RP11-556O5  | -0.766 | 0.123  | 0.313  | -0.493 | -0.183 | 0.000123 |
| TRIM69      | -0.781 | -0.158 | 0.043  | 0.009  | -0.048 | 0.000124 |
| RP4-774G10  | 0.42   | 0.493  | 0.289  | 0.114  | -0.395 | 0.000124 |
| RP13-507I23 | 0.371  | 0.047  | -0.042 | 0.427  | 0.135  | 0.000125 |
| MORN4       | -0.117 | 0.077  | 0.346  | 0.601  | 0.471  | 0.000126 |

|             |        |        |        |        |        |          |
|-------------|--------|--------|--------|--------|--------|----------|
| ATP6V1H     | 0.366  | 0.186  | 0.051  | 0.498  | 0.336  | 0.000126 |
| ALG13       | -0.222 | -0.027 | 0.044  | -0.469 | -0.312 | 0.000126 |
| AC001226.1  | 0.479  | -0.03  | -0.101 | 0.293  | 0.267  | 0.000127 |
| TMEM60      | -0.502 | -0.377 | -0.332 | -0.294 | -0.145 | 0.000127 |
| ZNF75D      | -0.52  | -0.213 | -0.097 | -0.268 | -0.31  | 0.000127 |
| COX18       | -0.191 | -0.014 | 0.066  | 0.013  | -0.342 | 0.000127 |
| RP11-15J10. | -0.51  | -0.488 | 0.322  | -0.897 | -0.84  | 0.000127 |
| DCLK2       | 0.059  | 0.093  | 0.023  | -0.444 | -0.386 | 0.000128 |
| SNORA81     | -0.007 | -0.044 | 0.07   | -0.765 | -0.879 | 0.000128 |
| TAF3        | 0.018  | 0.326  | 0.151  | 0.054  | 0.065  | 0.000129 |
| CTC-429L19  | -0.696 | -0.139 | 0.003  | -0.986 | -0.855 | 0.000129 |
| PDE7A       | -0.281 | 0.019  | -0.21  | -0.506 | -0.369 | 0.00013  |
| ZNF114      | 0.144  | -0.209 | -0.365 | -0.45  | -0.996 | 0.00013  |
| FLT3LG      | 0.099  | 0.708  | 0.885  | 0.704  | 0.986  | 0.000131 |
| FAM234A     | 0.16   | 0.029  | -0.024 | 0.351  | 0.333  | 0.000131 |
| CTD-2245F1  | -0.365 | 0.111  | 0.134  | 0.231  | 0.376  | 0.000132 |
| ERMAP       | -0.107 | 0.078  | 0.325  | 0.057  | 0.238  | 0.000132 |
| ERI2        | -0.404 | -0.057 | 0.094  | -0.067 | -0.286 | 0.000132 |
| PLPP2       | 0.011  | -0.156 | -0.37  | -0.305 | 0.649  | 0.000133 |
| ZNF585B     | -0.154 | 0.493  | 0.47   | 0.436  | 0.594  | 0.000133 |
| XRCC6       | 0.379  | 0.171  | 0.029  | 0.48   | 0.18   | 0.000133 |
| NSF         | 0.477  | 0.221  | 0.245  | 0.592  | 0.414  | 0.000136 |
| WBP4        | 0.369  | 0.251  | 0.074  | 0.349  | 0.161  | 0.000137 |
| RP3-339A18  | -0.15  | -0.334 | -0.601 | -0.431 | -1.317 | 0.000137 |
| CSNK2A1     | 0.276  | 0.085  | -0.014 | 0.208  | 0.374  | 0.000138 |
| GLUD1       | 0.431  | 0.132  | -0.05  | 0.252  | 0.349  | 0.000138 |
| LZIC        | 0.113  | 0.197  | 0.227  | 0.362  | 0.142  | 0.000138 |
| STAB1       | -0.261 | -0.185 | -0.008 | -0.343 | -0.031 | 0.000138 |
| TUBB4B      | 0.247  | -0.08  | -0.174 | 0.353  | -0.192 | 0.000138 |
| BFSP1       | -0.041 | -0.313 | 0.002  | -0.002 | 0.614  | 0.000139 |
| CTD-2545G1  | -0.745 | -0.532 | -0.178 | -1.026 | -0.835 | 0.000139 |
| SNORA66     | -0.658 | -0.014 | -0.103 | -1.016 | -0.952 | 0.000139 |
| SVIP        | -0.329 | -0.221 | -0.275 | -0.613 | -0.528 | 0.00014  |
| RP11-1094M  | 0.347  | 0.091  | 0.08   | 0.558  | 0.3    | 0.000141 |
| PCDHGB2     | 0.292  | -0.133 | -0.088 | 0.039  | 0.67   | 0.000142 |
| AK6         | -0.312 | -0.188 | -0.017 | -0.307 | -0.521 | 0.000142 |
| RP11-326A1  | 0.178  | -0.255 | -0.24  | -0.124 | -0.373 | 0.000143 |
| ZNF622      | 0.111  | 0.099  | 0.132  | 0.483  | 0.367  | 0.000144 |

|             |        |        |        |        |        |          |
|-------------|--------|--------|--------|--------|--------|----------|
| DPCD        | 0.077  | -0.028 | -0.057 | 0.233  | 0.356  | 0.000144 |
| SRP54       | 0.443  | 0.158  | -0.002 | 0.396  | 0.23   | 0.000144 |
| RP11-4K3__  | 0.216  | -0.268 | -0.415 | -0.12  | -0.173 | 0.000144 |
| WBP1        | -0.268 | 0.29   | 0.108  | -0.348 | -0.195 | 0.000144 |
| NPDC1       | -0.353 | -0.148 | -0.061 | -0.416 | -0.276 | 0.000144 |
| KCNIP2      | -0.588 | 0.004  | 0.215  | -0.881 | -0.578 | 0.000144 |
| RP11-23F23  | 0.195  | -0.101 | -0.489 | -0.51  | -0.493 | 0.000145 |
| PREP        | 0.332  | -0.045 | -0.227 | 0.1    | 0.132  | 0.000147 |
| AC005251.3  | -0.117 | -0.193 | -0.123 | -0.423 | -0.495 | 0.000147 |
| SEC24B      | 0.231  | 0.125  | 0.01   | 0.168  | 0.373  | 0.000148 |
| SP140L      | 0.092  | 0.093  | 0.266  | 0.185  | 0.325  | 0.000148 |
| RP11-557H1  | -0.055 | -0.231 | -0.753 | -0.899 | -0.975 | 0.000148 |
| GK          | -0.432 | -0.012 | -0.008 | -0.161 | -0.695 | 0.00015  |
| RRM1        | 0.365  | 0.231  | 0.098  | 0.497  | -0.119 | 0.000151 |
| ZBTB44      | 0.17   | 0.263  | 0.272  | 0.151  | 0.347  | 0.000152 |
| RP11-432J2: | -0.493 | 0.206  | 0.597  | 0.241  | -0.026 | 0.000152 |
| POTEF       | 0.415  | -0.218 | -0.084 | 0.156  | -0.223 | 0.000152 |
| RPL37       | -0.34  | -0.188 | -0.096 | -0.623 | -0.515 | 0.000152 |
| RP11-567M1  | -0.427 | -0.126 | -0.21  | -0.697 | -0.675 | 0.000152 |
| DNAJC4      | -0.123 | 0.061  | 0.032  | -0.041 | 0.342  | 0.000153 |
| MNS1        | -0.066 | -0.088 | -0.176 | 0.131  | -0.941 | 0.000154 |
| PJA1        | 0.139  | 0.093  | 0.057  | 0.446  | 0.428  | 0.000155 |
| LDOC1L      | 0.055  | 0.137  | -0.036 | 0.217  | 0.327  | 0.000155 |
| RPL38       | -0.219 | -0.216 | -0.098 | -0.454 | -0.447 | 0.000155 |
| RP4-614O4.  | 0.128  | 0.482  | 1.068  | 0.416  | 0.673  | 0.000156 |
| SNW1        | 0.262  | 0.129  | 0.028  | 0.355  | 0.295  | 0.000156 |
| JDP2        | 0.574  | 0.08   | -0.087 | 0.066  | 0.278  | 0.000156 |
| HMBS        | -0.112 | -0.281 | -0.261 | -0.169 | -0.39  | 0.000156 |
| LSM1        | -0.156 | -0.172 | -0.123 | -0.232 | -0.541 | 0.000156 |
| FMNL1       | -0.025 | 0.447  | 0.495  | 0.036  | 0.895  | 0.000157 |
| C11orf68    | -0.033 | 0.066  | 0.137  | 0.367  | 0.224  | 0.000157 |
| RP5-857K21  | -0.231 | -0.208 | 0.45   | -0.932 | -0.394 | 0.000157 |
| ATP5I       | -0.3   | -0.195 | -0.075 | -0.5   | -0.518 | 0.000157 |
| FLII        | 0.189  | 0.086  | 0.119  | 0.334  | 0.364  | 0.000158 |
| RTN4IP1     | -0.023 | -0.157 | 0.016  | 0.204  | -0.501 | 0.000158 |
| RP11-259N1  | -0.647 | -0.346 | -0.443 | -0.159 | -0.676 | 0.000159 |
| RP11-96H19  | -0.075 | -0.064 | -0.054 | -0.343 | -0.934 | 0.000159 |
| MYOM3       | 0.357  | 0.254  | 0.427  | 0.529  | 0.403  | 0.00016  |

|             |        |        |        |        |        |          |
|-------------|--------|--------|--------|--------|--------|----------|
| SMPD1       | 0.208  | 0.072  | -0.077 | 0.321  | 0.33   | 0.00016  |
| RP11-17A4.1 | -0.427 | -0.337 | -0.199 | -0.674 | -0.571 | 0.00016  |
| MRPL44      | 0.276  | 0.206  | 0.037  | 0.388  | 0.323  | 0.000161 |
| TRAIP       | -0.265 | -0.21  | -0.237 | -0.33  | -0.536 | 0.000161 |
| PSMD1       | 0.488  | 0.269  | 0.191  | 0.61   | 0.218  | 0.000162 |
| SOBP        | 0.079  | -0.197 | -0.383 | -0.496 | 0.116  | 0.000162 |
| PIPSL       | 0.372  | -0.013 | -0.035 | 0.364  | 0.088  | 0.000162 |
| CTC-281F24  | -0.421 | 0.21   | 0.197  | -0.483 | -0.479 | 0.000162 |
| CTC-548K16  | -0.747 | -0.021 | 0.194  | -0.934 | -0.603 | 0.000162 |
| COMMD7      | 0.072  | -0.016 | 0.027  | 0.171  | 0.358  | 0.000163 |
| RF00092     | -0.481 | -0.226 | -0.107 | -0.852 | -0.949 | 0.000163 |
| GLDCP1      | -0.098 | -0.073 | 0.183  | 0.479  | 0.827  | 0.000164 |
| SLC35A1     | -0.414 | -0.162 | -0.085 | -0.254 | -0.291 | 0.000164 |
| NPIPA3      | -0.179 | 0.235  | 0.349  | -0.674 | -0.697 | 0.000164 |
| HIPK2       | 0.254  | 0.121  | 0.255  | 0.306  | 0.339  | 0.000165 |
| SNORA63     | -0.48  | -0.075 | -0.138 | -0.562 | -1.059 | 0.000165 |
| AEBP2       | 0.33   | 0.274  | 0.056  | 0.203  | 0.116  | 0.000166 |
| JTB         | -0.281 | -0.233 | -0.19  | -0.468 | -0.479 | 0.000166 |
| NFYB        | -0.147 | -0.091 | -0.338 | -0.363 | -0.283 | 0.000167 |
| SCOC        | -0.21  | -0.144 | -0.085 | -0.368 | -0.58  | 0.000167 |
| SPACA6      | -0.304 | -0.276 | -0.15  | -0.878 | -0.443 | 0.000168 |
| CAPZB       | 0.303  | 0.069  | -0.048 | 0.286  | 0.349  | 0.000169 |
| GAS5        | -0.32  | 0.04   | 0.117  | -0.681 | -0.383 | 0.00017  |
| C2orf76     | -0.318 | -0.064 | -0.197 | -0.542 | -0.676 | 0.000171 |
| RP5-1103G7  | -0.371 | 0.106  | 0.455  | 0.108  | 0.543  | 0.000172 |
| RP11-124N1  | 0.099  | -0.317 | -0.092 | -0.036 | 0.434  | 0.000172 |
| DOCK7       | 0.326  | 0.016  | -0.152 | 0.166  | 0.356  | 0.000172 |
| ERCC6L2     | -0.167 | -0.155 | 0.073  | 0.015  | 0.349  | 0.000172 |
| SNORD35A    | -0.18  | -0.226 | -0.148 | -0.856 | -1.038 | 0.000172 |
| TOM1L1      | 0.124  | 0.462  | 0.365  | 0.652  | 0.928  | 0.000173 |
| TTC4        | -0.042 | -0.029 | -0.01  | 0.315  | -0.384 | 0.000173 |
| THOC3       | 0.038  | 0.277  | -0.106 | 0.447  | 0.477  | 0.000174 |
| IK          | 0.253  | 0.181  | 0.134  | 0.459  | 0.368  | 0.000174 |
| PPP2CB      | 0.369  | 0.156  | 0.06   | 0.33   | 0.25   | 0.000174 |
| NFATC3      | 0.366  | 0.302  | 0.228  | 0.34   | 0.067  | 0.000174 |
| AC007040.7  | -0.688 | 0.017  | 0.457  | 0.542  | -0.098 | 0.000174 |
| RP11-571F1  | 0.227  | -0.151 | -0.386 | 0.004  | -0.266 | 0.000174 |
| THOP1       | -0.065 | -0.075 | -0.284 | -0.19  | -0.407 | 0.000174 |

|             |        |        |        |        |        |          |
|-------------|--------|--------|--------|--------|--------|----------|
| TIGD2       | -0.008 | 0.212  | -0.035 | 0.128  | -0.57  | 0.000174 |
| ZNF32       | -0.446 | -0.159 | 0.168  | -0.01  | 0.265  | 0.000175 |
| SIL1        | 0.243  | -0.007 | -0.085 | 0.377  | 0.144  | 0.000175 |
| ARHGEF10    | -0.281 | 0.018  | 0.348  | -0.524 | -0.17  | 0.000175 |
| BCL2L12     | -0.138 | -0.098 | -0.177 | -0.172 | -0.43  | 0.000175 |
| DAPK1       | -0.21  | -0.141 | 0.019  | -0.104 | 0.375  | 0.000176 |
| METTL12     | -0.203 | 0.185  | -0.369 | -0.359 | -0.354 | 0.000176 |
| NUDC        | 0.241  | 0.014  | -0.06  | 0.314  | 0.349  | 0.000177 |
| AC079776.2  | -0.538 | 0.13   | 0.282  | -0.135 | 0.147  | 0.000178 |
| RP11-504P2  | -0.661 | -0.035 | 0.077  | -0.72  | -0.021 | 0.000178 |
| RP11-93L9.1 | -0.631 | -0.159 | 0.196  | -0.467 | -0.204 | 0.000178 |
| RP11-138H1  | -0.139 | 0.564  | 0.376  | -0.24  | -0.735 | 0.000178 |
| HLA-V       | -0.011 | -0.255 | -0.041 | 0.22   | 0.701  | 0.000179 |
| PGP         | -0.292 | -0.261 | -0.259 | -0.52  | -0.304 | 0.000179 |
| VCL         | 0.341  | 0.147  | -0.094 | 0.078  | 0.364  | 0.000181 |
| LBHD1       | -0.57  | -0.127 | 0.349  | -0.23  | -0.262 | 0.000181 |
| RP11-513I15 | -0.159 | -0.287 | -0.215 | -0.416 | -0.533 | 0.000181 |
| HCFC1R1     | 0.02   | -0.22  | -0.23  | -0.034 | -0.467 | 0.000182 |
| ZNF77       | -0.236 | -0.131 | -0.247 | -0.511 | -0.689 | 0.000182 |
| ZNF699      | 0.197  | 0.191  | -0.083 | -0.397 | -0.475 | 0.000183 |
| RP11-468E2  | -0.925 | 0.092  | -0.366 | -0.951 | -0.43  | 0.000186 |
| EHHADH      | 0.208  | 0.055  | 0.21   | 0.717  | 0.386  | 0.000187 |
| RP11-714G1  | 0.349  | -0.223 | -0.381 | 0.086  | 0.105  | 0.000187 |
| PTMAP5      | 0.334  | -0.063 | -0.093 | 0.05   | -0.095 | 0.000187 |
| RP1-232L22  | -0.199 | 0.102  | 0.071  | 0.306  | -0.372 | 0.000187 |
| SNORA27     | -0.406 | 0      | -0.255 | -1.038 | -0.947 | 0.000187 |
| AP000358.3  | 0.032  | -0.164 | -0.06  | -0.001 | -0.847 | 0.000188 |
| CDKAL1      | 0.215  | 0.107  | 0.261  | 0.325  | -0.005 | 0.000189 |
| ARHGEF10L   | 0.109  | 0.048  | 0.002  | -0.399 | 0.504  | 0.00019  |
| COX20P1     | -0.326 | -0.217 | -0.113 | -0.332 | -0.661 | 0.00019  |
| DDX46       | 0.278  | 0.225  | 0.157  | 0.36   | 0.095  | 0.000191 |
| CTD-2366F1  | -0.561 | -0.056 | 0.241  | 0.156  | -0.223 | 0.000191 |
| LSM5        | -0.517 | -0.263 | -0.156 | -0.564 | -0.594 | 0.000191 |
| UQCC2       | -0.369 | -0.217 | -0.159 | -0.427 | -0.62  | 0.000192 |
| FAM27E3     | -0.385 | 0.06   | 0.12   | -0.065 | -0.768 | 0.000193 |
| RF01977     | -0.956 | -0.299 | 0.198  | -0.79  | -0.34  | 0.000196 |
| RPL37P23    | -0.424 | -0.312 | -0.17  | -0.639 | -0.552 | 0.000196 |
| POLR3GL     | 0.109  | 0.092  | 0.132  | 0.375  | 0.326  | 0.000197 |

|              |        |        |        |        |        |          |
|--------------|--------|--------|--------|--------|--------|----------|
| CCDC57       | -0.245 | -0.052 | 0.27   | -0.367 | -0.235 | 0.000197 |
| ACTR1A       | 0.297  | 0.103  | 0.031  | 0.348  | 0.406  | 0.000198 |
| RP11-77H9.2  | -0.65  | 0.096  | 0.015  | -0.748 | -0.115 | 0.000198 |
| RP11-392E2   | -0.312 | -0.105 | 0.085  | -0.716 | -0.751 | 0.000198 |
| CTC-429P9.1  | -0.384 | -0.44  | 0.166  | -0.514 | 0.433  | 0.000199 |
| RP11-473M2   | -0.539 | 0.102  | 0.514  | -0.299 | 0.39   | 0.000199 |
| CALM3        | 0.152  | -0.035 | -0.009 | 0.323  | 0.206  | 0.000199 |
| RP11-379B1   | -0.955 | -0.116 | 0.341  | -0.197 | 0.105  | 0.000199 |
| CABLES2      | 0.164  | -0.056 | -0.064 | 0.055  | -0.379 | 0.0002   |
| CTNNAP1      | 0.355  | -0.089 | 0.057  | 0.385  | 0.545  | 0.000201 |
| CLTC         | 0.453  | 0.18   | 0.09   | 0.538  | 0.493  | 0.000201 |
| RP11-927P2   | -0.218 | 0      | -0.121 | -0.981 | -0.159 | 0.000201 |
| DDX31        | -0.369 | -0.115 | -0.116 | -0.153 | -0.262 | 0.000201 |
| AC126118.1   | 0.262  | 0.194  | -0.413 | -0.466 | -0.57  | 0.000201 |
| ABCB9        | 0.038  | 0.255  | 0.335  | 0.284  | 0.35   | 0.000203 |
| TCEAL3       | 0.213  | 0.13   | 0.116  | 0.416  | 0.275  | 0.000203 |
| C12orf72     | -0.432 | 0.172  | 0.302  | 0.326  | -0.103 | 0.000203 |
| CSRP2BP      | -0.164 | 0.006  | 0.041  | 0.01   | -0.488 | 0.000203 |
| CTD-2006C1   | 0.437  | 0.283  | -0.122 | -0.312 | -0.724 | 0.000203 |
| SHCBP1       | 0.054  | -0.238 | -0.37  | 0.101  | -0.146 | 0.000204 |
| RASD1        | 0.268  | 0.351  | -0.026 | -0.028 | 0.511  | 0.000206 |
| FAM98A       | 0.378  | 0.179  | 0.133  | 0.465  | 0.415  | 0.000207 |
| CACFD1       | -0.115 | -0.236 | 0.227  | 0.336  | 0.077  | 0.000207 |
| NCL          | 0.506  | 0.163  | -0.012 | 0.333  | 0.035  | 0.000207 |
| RPP21        | 0.003  | 0.091  | 0.045  | -0.117 | -0.63  | 0.000207 |
| PDP2         | -0.341 | 0.053  | -0.264 | -0.151 | -0.343 | 0.000208 |
| SYCE1L       | -0.596 | -0.175 | 0.037  | -0.527 | 0.312  | 0.00021  |
| RP11-541J2.  | 0.449  | -0.19  | -0.344 | 0.042  | 0.073  | 0.00021  |
| PAF1         | 0.182  | 0.072  | 0.091  | 0.461  | 0.037  | 0.00021  |
| LACTB2       | -0.311 | -0.047 | 0.082  | -0.185 | -0.562 | 0.00021  |
| UBOX5        | 0.307  | -0.014 | 0.054  | 0.396  | 0.35   | 0.000211 |
| TMEM14A      | -0.425 | -0.298 | -0.036 | -0.068 | 0.268  | 0.000212 |
| RP11-427L1.1 | -0.682 | 0.246  | -0.189 | -0.978 | -0.178 | 0.000212 |
| SNORD57      | -0.286 | -0.288 | -0.2   | -0.963 | -1.155 | 0.000212 |
| CTA-407F11   | 0.001  | -0.376 | -0.288 | -0.061 | 0.159  | 0.000213 |
| OSER1        | -0.148 | 0.124  | -0.039 | -0.104 | -0.335 | 0.000213 |
| WDR89        | -0.423 | -0.151 | -0.192 | -0.181 | -0.397 | 0.000213 |
| CTDP1        | 0.28   | 0.301  | 0.129  | 0.337  | 0.454  | 0.000214 |

|              |        |        |        |        |        |          |
|--------------|--------|--------|--------|--------|--------|----------|
| XRCC5        | 0.442  | 0.197  | 0.066  | 0.543  | 0.333  | 0.000214 |
| FGFR1OP      | -0.401 | -0.148 | 0.083  | -0.178 | -0.341 | 0.000214 |
| TMEM218      | -0.326 | -0.289 | -0.154 | -0.383 | -0.674 | 0.000214 |
| ABCC2        | -0.059 | 0.027  | -0.028 | -0.303 | -0.819 | 0.000214 |
| CLCN2        | 0.019  | 0.139  | -0.031 | -0.29  | -0.466 | 0.000218 |
| CCT8         | 0.34   | 0.177  | 0.022  | 0.329  | 0.135  | 0.00022  |
| QRICH1       | 0.322  | 0.138  | 0.009  | 0.122  | -0.023 | 0.000222 |
| TRIM26       | 0.414  | 0.222  | 0.118  | 0.128  | 0.149  | 0.000224 |
| RP11-421P1   | 0.548  | -0.427 | -0.146 | -0.674 | -0.618 | 0.000224 |
| ARFGAP3      | 0.456  | 0.147  | 0.109  | 0.247  | 0.211  | 0.000225 |
| VDAC1        | 0.391  | 0.128  | -0.058 | 0.207  | 0.137  | 0.000225 |
| LSMEM1       | 0.167  | 0.043  | 0.272  | -0.658 | -0.586 | 0.000227 |
| LMO2         | 0.327  | -0.201 | -0.239 | -0.018 | 0.007  | 0.000229 |
| RP11-264M2   | 0.094  | -0.288 | -0.387 | -0.494 | -0.513 | 0.000229 |
| STAM         | 0.382  | 0.255  | -0.025 | 0.232  | 0.233  | 0.00023  |
| NAT6         | 0.017  | 0.398  | 0.205  | 0.02   | -0.115 | 0.000232 |
| RP11-521B2   | -0.077 | -0.082 | -0.095 | -0.341 | -0.637 | 0.000232 |
| RP11-62H7.3  | -0.691 | -0.856 | -0.48  | -0.912 | -0.884 | 0.000233 |
| OGDH         | 0.456  | 0.183  | 0.117  | 0.561  | 0.243  | 0.000235 |
| OSBPL1A      | 0.018  | -0.001 | -0.174 | -0.012 | 0.34   | 0.000236 |
| PEX11G       | -0.268 | 0.072  | 0.282  | 0.346  | 0.87   | 0.000237 |
| ZBTB37       | -0.313 | 0.191  | 0.366  | -0.148 | -0.002 | 0.000238 |
| SPRYD3       | 0.392  | 0.076  | -0.043 | 0.176  | -0.109 | 0.000241 |
| AC019188.1   | -0.326 | -0.335 | -0.219 | -0.518 | 0.022  | 0.000243 |
| ZNF180       | 0.026  | -0.05  | -0.132 | -0.317 | -0.408 | 0.000243 |
| MAPK1IP1L    | 0.447  | 0.234  | 0.048  | 0.2    | 0.084  | 0.000244 |
| GTF2F2       | 0.31   | 0.147  | 0.146  | 0.411  | 0.344  | 0.000247 |
| PPME1        | 0.163  | 0.153  | 0.125  | 0.558  | 0.213  | 0.000247 |
| CTB-161M19   | 0.4    | 0.125  | 0.048  | 0.322  | 0.14   | 0.000247 |
| TGDS         | -0.426 | -0.144 | -0.135 | -0.452 | -0.51  | 0.000247 |
| RP5-831D17   | 0.128  | -0.211 | 0.009  | 0.405  | 0.506  | 0.000249 |
| RP11-512F2.1 | 0.3    | 0.164  | 0.063  | 0.466  | 0.094  | 0.00025  |
| SNORD3A      | 0      | 0.583  | 0.545  | -0.493 | -0.076 | 0.000253 |
| RP3-347M6.1  | 0.017  | -0.413 | -0.429 | -0.215 | -0.347 | 0.000253 |
| IP6K1        | 0.182  | 0.125  | -0.064 | 0.241  | 0.373  | 0.000254 |
| GNAS         | 0.36   | 0.094  | -0.078 | 0.221  | 0.036  | 0.000254 |
| SMC3         | 0.409  | 0.058  | -0.034 | 0.229  | -0.049 | 0.000254 |
| AC046143.5   | -0.479 | -0.328 | -0.134 | -0.54  | -1.05  | 0.000254 |

|             |        |        |        |        |        |          |
|-------------|--------|--------|--------|--------|--------|----------|
| RP11-611D2  | -0.808 | 0.032  | 0.459  | -0.29  | -0.158 | 0.000256 |
| RP11-736K2  | -0.474 | -0.507 | -0.14  | 0.174  | -0.242 | 0.000257 |
| UBL3        | 0.408  | 0.227  | 0.007  | 0.281  | 0.34   | 0.000258 |
| CCDC186     | 0.333  | 0.222  | 0.203  | 0.219  | 0.204  | 0.000258 |
| CEP41       | 0.171  | -0.097 | 0.029  | 0.329  | 0.123  | 0.000258 |
| RP11-324H6  | -0.353 | 0.097  | 0.039  | -0.753 | -0.809 | 0.000258 |
| GAPDHP38    | 0.381  | 0.048  | 0.066  | 0.46   | 0.566  | 0.00026  |
| OSBPL8      | 0.251  | 0.196  | 0.082  | 0.262  | 0.398  | 0.00026  |
| ZNF236      | -0.096 | 0.026  | 0.114  | -0.163 | -0.365 | 0.000261 |
| ZNF446      | -0.336 | 0.224  | 0.135  | 0.098  | 0.082  | 0.000262 |
| MIR21       | 0.359  | 0.315  | 0.41   | -0.746 | -0.092 | 0.000262 |
| ZNF593      | -0.174 | -0.136 | -0.02  | -0.019 | -0.372 | 0.000262 |
| RP11-1H8.2  | 0.317  | 0.048  | -0.033 | 0.434  | -0.051 | 0.000267 |
| RP5-894A10  | 0.324  | 0.106  | 0.185  | -0.616 | 0.139  | 0.000269 |
| IRF7        | 0.187  | 0.382  | 0.217  | -0.095 | -0.021 | 0.000269 |
| PGAP3       | 0.108  | 0.138  | -0.008 | -0.123 | -0.397 | 0.000269 |
| GLB1L       | -0.04  | -0.08  | -0.061 | 0.175  | 0.573  | 0.00027  |
| CTC-358I24. | -0.503 | -0.002 | 0.158  | -0.517 | -0.344 | 0.00027  |
| UQCR10      | -0.192 | -0.253 | -0.094 | -0.245 | -0.354 | 0.00027  |
| SLC2A3      | -0.023 | -0.136 | -0.163 | 0.023  | -0.342 | 0.000271 |
| CKS1A       | -0.532 | -0.657 | -0.364 | -0.637 | -0.826 | 0.000271 |
| NUDT7       | -0.232 | -0.527 | 0.171  | 0.461  | 0.125  | 0.000272 |
| COX20       | -0.152 | -0.139 | -0.049 | -0.206 | -0.476 | 0.000272 |
| COX16       | -0.206 | -0.156 | -0.081 | -0.477 | -0.57  | 0.000273 |
| XXbac-BPG3  | -0.099 | 0.148  | 0.213  | -0.921 | -0.63  | 0.000273 |
| HLA-K       | -0.065 | 0.526  | 0.374  | -0.32  | 0.217  | 0.000274 |
| ZNF629      | 0.344  | 0.146  | 0.026  | -0.014 | 0.012  | 0.000274 |
| LDHAP7      | 0.337  | -0.069 | 0.033  | 0.506  | 0.434  | 0.000275 |
| ADO         | 0.151  | -0.014 | -0.039 | 0.152  | 0.323  | 0.000275 |
| RP11-890B1  | 0.059  | 0.038  | 0.087  | -0.025 | 0.587  | 0.000276 |
| ESX1        | -0.069 | -0.494 | -0.676 | -0.252 | -0.187 | 0.000276 |
| RALGPS1     | -0.079 | 0.373  | 0.764  | 0.237  | 0.522  | 0.000277 |
| TMSB4XP4    | -0.31  | -0.437 | -0.429 | -1.06  | -0.345 | 0.000279 |
| FAM173A     | -0.239 | 0.051  | 0.146  | -0.264 | 0.327  | 0.00028  |
| PMS2L3      | -0.154 | 0.322  | 0.353  | -0.305 | -0.143 | 0.00028  |
| ZNF791      | 0.358  | 0.328  | 0.209  | 0.127  | 0.117  | 0.000281 |
| RBM43       | -0.078 | 0.064  | -0.005 | 0.432  | 0.357  | 0.000284 |
| IPO5        | 0.387  | 0.112  | 0.014  | 0.288  | 0.309  | 0.000284 |



|             |        |        |        |        |        |          |
|-------------|--------|--------|--------|--------|--------|----------|
| ZNF408      | 0.024  | 0.149  | 0.015  | -0.065 | -0.324 | 0.000284 |
| PPM1J       | -0.423 | 0.199  | 0.378  | 0.148  | 0.684  | 0.000285 |
| TAPBPL      | 0.162  | 0.17   | 0.226  | 0.193  | 0.493  | 0.000285 |
| RP1-146H21  | -0.031 | 0.05   | 0.091  | 0.696  | 0.256  | 0.000285 |
| BET1        | -0.43  | -0.18  | 0.036  | -0.347 | -0.268 | 0.000285 |
| ARHGEF25    | -0.153 | 0.329  | 0.083  | -0.139 | -0.403 | 0.000285 |
| TM9SF4      | 0.18   | 0.1    | 0.042  | 0.277  | 0.341  | 0.000286 |
| ZBTB49      | -0.083 | 0.206  | 0.002  | -0.405 | -0.322 | 0.000286 |
| TAF11       | -0.182 | -0.161 | -0.087 | -0.127 | -0.363 | 0.000286 |
| DYNC1H1     | 0.166  | 0.154  | 0.157  | 0.214  | 0.539  | 0.000288 |
| ZNF44       | -0.097 | 0.005  | -0.161 | -0.452 | -0.441 | 0.000289 |
| MT-TA       | 0.111  | 0.1    | 0.456  | -0.776 | -0.498 | 0.000289 |
| RP11-278A1  | 0.056  | -0.093 | 0.076  | 0.231  | 0.458  | 0.000292 |
| SDHD        | -0.011 | 0.001  | 0.006  | -0.117 | -0.336 | 0.000292 |
| TRIM13      | 0.368  | 0.174  | 0.185  | 0.007  | 0.321  | 0.000295 |
| SERPINE2    | 0.353  | 0.194  | 0.076  | 0.252  | -0.301 | 0.000296 |
| GTF2A2      | -0.311 | -0.124 | -0.098 | -0.476 | -0.489 | 0.000296 |
| SNORD65     | -0.15  | -0.06  | 0.133  | -0.671 | -0.838 | 0.000296 |
| AC090018.3  | -0.589 | -0.042 | 0.054  | -0.858 | -0.905 | 0.000296 |
| CRIP1       | -0.255 | -0.006 | 0.07   | -0.198 | -0.354 | 0.000298 |
| RP11-196I18 | -0.122 | -0.197 | 0.065  | -0.13  | -0.698 | 0.000298 |
| ABHD14B     | 0.169  | 0.12   | 0.127  | 0.361  | 0.361  | 0.000304 |
| DET1        | 0.07   | 0.183  | 0.406  | 0.53   | 0.197  | 0.000304 |
| FAM124A     | -0.564 | -0.333 | -0.415 | -0.317 | -0.127 | 0.000304 |
| IRF2BP1     | 0.012  | 0.001  | -0.087 | 0.134  | 0.494  | 0.000305 |
| RP11-105D1  | -0.06  | -0.315 | -0.436 | -0.073 | -0.395 | 0.000305 |
| ZNF83       | -0.347 | 0.082  | 0.249  | -0.381 | -0.034 | 0.000307 |
| CTD-2120M2  | 0.454  | -0.027 | -0.151 | -0.201 | -0.027 | 0.000308 |
| ATAT1       | -0.248 | 0.018  | 0.192  | -0.41  | -0.045 | 0.000309 |
| FAM162A     | -0.235 | -0.19  | -0.071 | -0.269 | -0.584 | 0.000311 |
| RP11-849H4  | -0.56  | -0.091 | -0.005 | -0.527 | -0.606 | 0.000311 |
| RP11-841C1  | 0.146  | -0.011 | 0.113  | 0.073  | -0.343 | 0.000312 |
| USP45       | -0.359 | -0.061 | 0.036  | -0.435 | -0.308 | 0.000313 |
| NAGA        | 0.162  | 0.034  | 0.052  | 0.366  | 0.271  | 0.000314 |
| RP11-631N1  | -0.445 | 0.062  | 0.392  | -0.483 | -0.267 | 0.000316 |
| RP11-69J16. | -0.395 | -0.358 | -0.215 | -0.693 | -0.724 | 0.000316 |
| AC010894.4  | -0.622 | -0.603 | -0.541 | -0.651 | -0.948 | 0.000316 |
| L34079.4    | -0.274 | 0.606  | 0.684  | -0.188 | 0.335  | 0.000317 |

|             |        |        |        |        |        |          |
|-------------|--------|--------|--------|--------|--------|----------|
| ZC3H8       | -0.344 | -0.096 | 0.019  | -0.22  | -0.309 | 0.000319 |
| SPICE1      | -0.07  | 0.026  | -0.059 | -0.203 | -0.426 | 0.00032  |
| TRIM23      | 0.364  | 0.327  | 0.197  | 0.181  | 0.014  | 0.000321 |
| TTC21A      | 0.05   | 0.071  | 0.343  | -0.523 | -0.299 | 0.000322 |
| VCP         | 0.541  | 0.174  | -0.03  | 0.376  | 0.074  | 0.000325 |
| RP11-21N3.1 | -0.183 | -0.244 | -0.313 | -0.18  | -0.433 | 0.000325 |
| SNORA26     | -0.71  | -0.151 | -0.059 | -0.83  | -0.995 | 0.000326 |
| GOLGA80     | -0.272 | -0.001 | 0.659  | -0.641 | -0.027 | 0.000327 |
| CTD-2013N1  | -0.404 | 0.013  | 0.236  | -0.636 | -0.606 | 0.000327 |
| NIPAL1      | -0.005 | 0.265  | 0.415  | 0.45   | 0.38   | 0.000328 |
| RP11-36B6.2 | -0.604 | -0.055 | 0.135  | -0.55  | -0.115 | 0.000329 |
| ARSE        | 0.346  | 0.074  | 0.035  | 0.28   | 0.884  | 0.00033  |
| ATIC        | 0.359  | -0.001 | -0.031 | 0.384  | 0.373  | 0.00033  |
| RPL37AP1    | -0.429 | -0.38  | -0.172 | -0.583 | -0.503 | 0.00033  |
| PSMA6       | -0.233 | -0.073 | -0.075 | -0.393 | -0.597 | 0.00033  |
| RNF180      | -0.231 | -0.067 | -0.124 | -0.052 | 0.625  | 0.000331 |
| IL6         | -0.319 | 0.111  | 0.093  | -0.217 | -0.519 | 0.000331 |
| RP1-71L16.2 | -0.277 | -0.273 | -0.109 | -0.659 | -0.524 | 0.000331 |
| RP11-515C1  | -0.35  | -0.384 | -0.425 | -0.47  | -0.805 | 0.000331 |
| KLHL35      | -0.774 | -0.107 | 0.194  | 0.243  | 0.174  | 0.000334 |
| RP11-1012A  | 0.253  | -0.04  | 0.003  | -0.152 | -0.738 | 0.000334 |
| CD79B       | -0.152 | 0.196  | 0.407  | 0.63   | 0.301  | 0.000338 |
| ZDHHC17     | -0.039 | 0.102  | 0.043  | -0.353 | -0.235 | 0.000339 |
| TUBB        | 0.347  | 0.089  | -0.007 | 0.496  | -0.009 | 0.00034  |
| PRDX3       | -0.138 | -0.109 | -0.114 | -0.238 | -0.405 | 0.00034  |
| OXNAD1      | -0.369 | -0.228 | -0.101 | -0.1   | -0.467 | 0.00034  |
| LYRM9       | -0.683 | 0.094  | 0.043  | -0.02  | 0.499  | 0.000341 |
| PRRT2       | -0.865 | -0.444 | -0.148 | -0.83  | -0.292 | 0.000342 |
| SMIM7       | -0.11  | -0.079 | -0.041 | -0.07  | -0.356 | 0.000344 |
| CTD-2537I9. | -0.615 | -0.501 | -0.196 | -1.2   | -0.845 | 0.000344 |
| RP11-548C2  | 0.217  | -0.076 | 0.084  | 0.647  | 0.453  | 0.000345 |
| HOXA7       | 0.297  | -0.011 | 0.008  | 0.464  | 0.223  | 0.000347 |
| DTWD1       | -0.353 | 0.09   | 0.279  | -0.132 | -0.024 | 0.000347 |
| RNA5SP383   | -0.066 | 0.301  | 0.336  | -0.658 | -0.696 | 0.000347 |
| UBXN11      | -0.502 | -0.033 | 0.188  | -0.255 | -0.39  | 0.000349 |
| RP11-1398P  | -0.106 | -0.194 | 0.293  | 0.692  | 0.849  | 0.000351 |
| MAGED2      | 0.268  | 0.111  | 0.017  | 0.403  | 0.278  | 0.000352 |
| NFS1        | 0.135  | -0.068 | -0.056 | 0.372  | 0.017  | 0.000356 |

|             |        |        |        |        |        |          |
|-------------|--------|--------|--------|--------|--------|----------|
| ATF7IP2     | -0.71  | -0.17  | -0.109 | -0.436 | -0.136 | 0.000357 |
| GLUD2       | 0.43   | 0.063  | -0.095 | 0.177  | 0.175  | 0.000358 |
| ST20        | -0.54  | -0.015 | 0.396  | -0.145 | 0.156  | 0.000358 |
| PA2G4P2     | 0.44   | 0.116  | 0.114  | 0.493  | -0.074 | 0.000361 |
| TRAK2       | -0.486 | -0.091 | -0.04  | -0.75  | -0.543 | 0.000361 |
| ATF1        | -0.093 | -0.037 | -0.084 | -0.032 | -0.369 | 0.000363 |
| AC009948.7  | 0.3    | -0.151 | -0.087 | 0.298  | 0.325  | 0.000366 |
| ZNF880      | 0.084  | -0.087 | 0.108  | 0.179  | 0.474  | 0.000368 |
| RP11-488L11 | -0.405 | 0.055  | 0.182  | -0.647 | -0.255 | 0.000368 |
| WDYHV1      | 0.028  | -0.065 | -0.093 | -0.456 | -0.546 | 0.000368 |
| RPAP3       | 0.397  | 0.163  | 0.055  | 0.392  | 0.194  | 0.000369 |
| CAPRIN1     | 0.347  | 0.098  | -0.035 | 0.308  | 0.347  | 0.00037  |
| PRPF19      | 0.334  | 0.022  | -0.099 | 0.334  | 0.112  | 0.00037  |
| ZNF426      | 0.244  | 0.19   | 0.057  | 0.156  | 0.365  | 0.000372 |
| LPP-AS2     | -0.215 | 0.051  | 0.247  | 0.543  | 0.342  | 0.000375 |
| ZNF229      | 0.231  | 0.44   | 0.185  | 0.059  | 0.205  | 0.000375 |
| TMC7        | 0.555  | 0.112  | 0.217  | 0.244  | 0.438  | 0.000376 |
| LIPT1       | -0.282 | 0.031  | 0.12   | -0.039 | -0.548 | 0.000376 |
| PIGBOS1     | -0.153 | -0.331 | -0.112 | -0.314 | -0.505 | 0.00038  |
| WDR83       | -0.018 | -0.04  | -0.02  | 0.041  | -0.435 | 0.000381 |
| ZNF329      | 0.443  | 0.411  | 0.377  | 0.261  | 0.317  | 0.000383 |
| SEMA4D      | -0.455 | -0.044 | 0.035  | -0.108 | 0.102  | 0.000385 |
| KIAA1586    | -0.122 | -0.012 | -0.069 | -0.201 | -0.492 | 0.000386 |
| TADA1       | -0.072 | 0      | -0.251 | -0.256 | -0.424 | 0.000388 |
| ZNF101      | -0.088 | 0.01   | -0.282 | -0.315 | -0.375 | 0.000392 |
| TBC1D31     | -0.217 | -0.137 | -0.092 | -0.117 | -0.568 | 0.000392 |
| NDUFB9      | -0.251 | -0.086 | -0.063 | -0.482 | -0.614 | 0.000396 |
| ENPP1       | 0.454  | 0.194  | 0.176  | 0.347  | 0.23   | 0.000409 |
| ARMCX6      | -0.193 | -0.148 | -0.172 | -0.205 | -0.453 | 0.000409 |
| RP11-64D22  | -0.328 | 0.205  | 0.318  | 0.029  | 0.525  | 0.00041  |
| ZNF10       | -0.073 | 0.124  | 0.045  | -0.613 | -0.345 | 0.00041  |
| CTB-47B8.1  | -0.274 | -0.41  | -0.374 | -0.442 | -0.512 | 0.00041  |
| CTD-2022H1  | 0.102  | -0.213 | -0.116 | 0.167  | 0.422  | 0.000412 |
| BORCS7      | 0.101  | 0.346  | 0.339  | 0.224  | 0.375  | 0.000418 |
| LEPR        | 0.052  | -0.092 | -0.065 | -0.066 | -0.428 | 0.000418 |
| RP11-344H1  | -0.276 | -0.271 | -0.235 | -0.681 | -0.624 | 0.000419 |
| FAM96A      | -0.33  | -0.103 | -0.069 | -0.37  | -0.622 | 0.00042  |
| TMEM67      | -0.079 | -0.071 | 0.102  | -0.008 | 0.403  | 0.000421 |

|            |        |        |        |        |        |          |
|------------|--------|--------|--------|--------|--------|----------|
| ZNF440     | -0.114 | -0.007 | -0.244 | -0.433 | -0.357 | 0.000421 |
| C11orf73   | -0.302 | -0.117 | -0.059 | -0.357 | -0.406 | 0.000421 |
| AC138517.4 | 0.533  | -0.045 | 0.004  | 0.354  | 0.369  | 0.000423 |
| CBS        | -0.666 | -0.19  | -0.467 | 0.239  | 0.035  | 0.000423 |
| AF015726.1 | -0.289 | -0.3   | -0.467 | -0.779 | -0.887 | 0.000423 |
| FAM221A    | -0.669 | -0.028 | 0.064  | -0.513 | -0.23  | 0.000424 |
| CCDC78     | -0.152 | 0.062  | 0.051  | -0.801 | -0.757 | 0.000428 |
| RP11-115C2 | -0.727 | -0.097 | -0.224 | -0.392 | -0.625 | 0.000429 |
| RP13-383K5 | 0.078  | -0.275 | -0.176 | -0.033 | -0.385 | 0.00043  |
| POLR2J4    | -0.117 | -0.037 | -0.114 | -0.311 | -0.55  | 0.00043  |
| RP11-367E1 | 0.294  | -0.04  | -0.081 | -0.133 | -0.471 | 0.000431 |
| RP11-66B24 | -0.278 | -0.14  | -0.192 | -0.027 | 0.631  | 0.000434 |
| LRSAM1     | 0.018  | 0.084  | 0.23   | 0.338  | 0.23   | 0.000434 |
| TARSL2     | 0.33   | 0.066  | -0.135 | -0.21  | 0.26   | 0.000435 |
| MIR6845    | -0.551 | -0.057 | 0.261  | -0.858 | -0.683 | 0.000436 |
| HGF        | -0.051 | 0.329  | 0.039  | -0.116 | -0.733 | 0.000439 |
| ZCCHC4     | -0.025 | 0.141  | 0.067  | -0.108 | -0.326 | 0.000442 |
| RP11-829H1 | -0.313 | -0.287 | -0.358 | -0.713 | -0.537 | 0.000442 |
| THRAP3     | 0.372  | 0.097  | 0.102  | 0.317  | 0.094  | 0.000443 |
| RP11-66N24 | -0.377 | 0.163  | 0.497  | -0.184 | 0.248  | 0.000444 |
| FAM133B    | 0.041  | 0.172  | 0.05   | -0.471 | -0.123 | 0.000444 |
| RP11-701H2 | -0.246 | 0.228  | 0.11   | -0.717 | -0.314 | 0.000447 |
| PLA2G6     | -0.205 | 0.097  | 0.413  | -0.098 | -0.353 | 0.000447 |
| HDLBP      | 0.437  | 0.158  | 0.06   | 0.318  | 0.39   | 0.000451 |
| SLC12A9    | -0.103 | -0.078 | -0.057 | -0.181 | -0.348 | 0.000451 |
| IMMT       | 0.371  | 0.149  | 0.086  | 0.456  | 0.261  | 0.000452 |
| RP11-61N20 | 0.124  | -0.146 | -0.407 | -0.339 | -0.517 | 0.000455 |
| AC005954.3 | -0.094 | 0.279  | -0.19  | -0.951 | -0.44  | 0.000457 |
| ALPK1      | -0.491 | -0.122 | 0.108  | 0.051  | 0.301  | 0.00046  |
| MSH3       | 0.454  | 0.241  | 0.177  | 0.445  | 0.309  | 0.000461 |
| DNALI1     | -0.074 | 0.106  | 0.153  | 0.088  | 0.858  | 0.000467 |
| RP11-73E17 | 0.733  | 0.546  | 0.05   | 0.26   | 0.635  | 0.000468 |
| PPIH       | -0.104 | -0.125 | -0.179 | 0.065  | -0.322 | 0.000468 |
| TUBG1P     | 0.127  | -0.149 | -0.1   | 0.376  | -0.258 | 0.000471 |
| ADD1       | 0.29   | 0.039  | -0.044 | 0.339  | 0.377  | 0.000472 |
| SNHG8      | -0.189 | -0.01  | 0.078  | -0.331 | -0.414 | 0.000472 |
| ECI1       | 0.051  | 0.007  | 0.026  | 0.201  | 0.35   | 0.000474 |
| SNORA5C    | -0.894 | -0.115 | -0.09  | -0.706 | -0.744 | 0.000474 |

|              |        |        |        |        |        |          |
|--------------|--------|--------|--------|--------|--------|----------|
| HOTAIRM1     | -0.629 | -0.342 | 0.107  | -0.587 | -0.272 | 0.000478 |
| TRAPPC2L     | -0.211 | -0.171 | -0.137 | -0.32  | -0.388 | 0.000478 |
| AC005682.5   | 0.059  | 0.04   | 0.238  | -0.481 | -0.449 | 0.000478 |
| RP11-73M7.1  | -0.347 | 0.169  | 0.599  | -0.293 | -0.295 | 0.000479 |
| GARS         | 0.373  | 0.161  | 0.032  | 0.401  | 0.293  | 0.000482 |
| HDAC4        | 0.266  | 0.067  | 0.333  | 0.257  | 0.018  | 0.000482 |
| ZNF292       | -0.038 | 0.069  | 0.037  | -0.377 | -0.021 | 0.000485 |
| RP11-61L23.1 | 0.354  | 0.195  | -0.083 | 0.231  | -0.373 | 0.000485 |
| MPPE1        | -0.146 | -0.058 | -0.093 | -0.389 | -0.337 | 0.000488 |
| RP11-708J1.1 | -0.061 | 0.098  | 0.331  | -0.652 | -0.513 | 0.000488 |
| IFT80        | -0.423 | -0.026 | 0.148  | -0.019 | -0.023 | 0.000492 |
| ELP3         | 0.327  | 0.165  | 0.139  | 0.502  | 0.291  | 0.000493 |
| RASGRP2      | -0.855 | -0.432 | -0.2   | -0.628 | -1.05  | 0.000493 |
| CAND1        | 0.332  | 0.093  | -0.037 | 0.237  | 0.249  | 0.000494 |
| MRPS9        | 0.268  | 0.158  | 0.058  | 0.375  | 0.084  | 0.000494 |
| ATP5G1       | -0.244 | -0.235 | -0.158 | -0.34  | -0.411 | 0.000494 |
| HERC2P9      | -0.616 | -0.117 | -0.029 | -0.807 | -0.839 | 0.000494 |
| JPX          | -0.337 | -0.184 | -0.055 | -0.417 | -0.341 | 0.000495 |
| KCND1        | -0.369 | 0.217  | 0.366  | -0.337 | -0.258 | 0.000496 |
| DSTNP2       | 0.209  | -0.088 | -0.034 | -0.021 | -0.372 | 0.000497 |
| PRKCD        | 0.17   | 0.368  | 0.216  | 0.247  | 0.157  | 0.000498 |
| MAML2        | -0.022 | -0.315 | -0.409 | -0.185 | -0.051 | 0.000499 |
| EID3         | 0.018  | 0.198  | -0.011 | -0.73  | -0.706 | 0.000499 |
| GCNT2        | 0.279  | 0.155  | 0.307  | 0.536  | 0.076  | 0.000504 |
| RP13-228J1.1 | 0.234  | -0.171 | -0.163 | -0.134 | 0.372  | 0.000505 |
| WBP2         | 0.18   | 0.088  | 0.137  | 0.374  | 0.405  | 0.000506 |
| GRWD1        | 0.142  | -0.061 | -0.14  | 0.033  | -0.327 | 0.000507 |
| FOXO3B       | 0.665  | 0.242  | 0.21   | 0.254  | 0.562  | 0.000508 |
| EIF5AL1      | 0.339  | 0.058  | 0.028  | 0.301  | 0.094  | 0.000511 |
| NHLRC3       | -0.369 | -0.092 | 0.116  | -0.19  | -0.278 | 0.000511 |
| PPIEL        | -0.384 | -0.127 | 0.141  | -0.749 | -0.505 | 0.000515 |
| SLC35A3      | -0.087 | -0.073 | -0.076 | -0.195 | -0.371 | 0.000519 |
| PDK2         | 0.201  | -0.014 | 0.074  | 0.304  | 0.405  | 0.00052  |
| WDR73        | -0.332 | -0.166 | 0.044  | -0.269 | -0.297 | 0.000521 |
| MED17        | 0.497  | 0.205  | 0.18   | 0.222  | 0.604  | 0.000525 |
| PLGRKT       | -0.101 | -0.198 | -0.277 | -0.503 | -0.465 | 0.000526 |
| RAPGEF6      | -0.214 | 0.118  | -0.181 | -0.345 | -0.332 | 0.000527 |
| CTC-534A2.1  | -0.148 | -0.036 | -0.232 | -0.559 | -0.737 | 0.000529 |

|             |        |        |        |        |        |          |
|-------------|--------|--------|--------|--------|--------|----------|
| NID1        | 0.261  | 0.135  | -0.013 | 0.298  | 0.445  | 0.00053  |
| SEC61A1     | 0.34   | 0.142  | -0.003 | 0.207  | 0.121  | 0.000531 |
| MST1P2      | -0.655 | 0.027  | 0.147  | -0.383 | -0.707 | 0.000531 |
| CRNKL1      | 0.279  | 0.246  | 0.086  | 0.396  | 0.11   | 0.000535 |
| RP11-252C2  | -0.209 | -0.563 | -0.372 | 0.075  | -0.127 | 0.000536 |
| VAMP2       | -0.054 | -0.015 | -0.096 | -0.347 | -0.206 | 0.000537 |
| RP11-727A2  | -0.357 | 0.045  | 0.059  | -0.805 | -0.895 | 0.000537 |
| GCNA        | -0.27  | 0.116  | 0.411  | -0.555 | -0.005 | 0.00054  |
| RPL26P30    | -0.061 | -0.107 | -0.033 | -0.286 | -0.592 | 0.00054  |
| FXYD5       | 0.243  | 0.042  | 0.023  | 0.363  | 0.214  | 0.000541 |
| GNGT2       | -0.341 | -0.068 | 0.17   | 0.319  | 0.435  | 0.000542 |
| RP1-68D18.2 | -0.008 | 0.363  | 0.66   | -0.653 | 0.105  | 0.000548 |
| DAW1        | -0.202 | -0.329 | 0.18   | 0.444  | -0.062 | 0.000548 |
| ZNF714      | -0.005 | -0.201 | -0.361 | -0.596 | -0.168 | 0.000548 |
| ZBTB8OS     | -0.108 | -0.04  | 0.032  | -0.24  | -0.423 | 0.000549 |
| ZNF215      | -0.38  | -0.081 | -0.056 | -0.162 | -0.498 | 0.00055  |
| HSP90AB3P   | 0.519  | 0.053  | -0.029 | 0.417  | 0.274  | 0.000551 |
| CBX7        | -0.199 | -0.082 | 0.397  | 0.14   | 0.107  | 0.000551 |
| SCML2       | 0.269  | 0.482  | 0.469  | 0.173  | -0.187 | 0.000552 |
| HNRNPM      | 0.41   | 0.183  | 0.096  | 0.447  | 0.444  | 0.000553 |
| TUBBP1      | 0.323  | 0.034  | 0.012  | 0.454  | -0.084 | 0.000555 |
| AVPI1       | 0.485  | 0.046  | -0.217 | -0.049 | -0.299 | 0.000557 |
| PROS1       | 0.359  | 0.296  | -0.116 | 0.407  | 0.59   | 0.000558 |
| C11orf83    | -0.301 | -0.366 | -0.169 | -0.249 | -0.456 | 0.000558 |
| RP11-478C1  | -0.565 | 0.153  | 0.137  | -0.666 | -0.602 | 0.000559 |
| SAR1B       | 0.009  | -0.007 | 0.035  | -0.098 | -0.344 | 0.000561 |
| GPI         | 0.369  | 0.1    | 0.052  | 0.497  | 0.482  | 0.000562 |
| RP11-390F4  | 0.431  | -0.145 | -0.183 | 0.171  | -0.088 | 0.000562 |
| ISCA1       | 0.06   | -0.108 | -0.195 | -0.27  | -0.332 | 0.000568 |
| TAP2        | 0.091  | 0.099  | 0.08   | 0.098  | 0.347  | 0.000569 |
| KAT6B       | 0.301  | 0.238  | 0.33   | 0.059  | 0.072  | 0.000571 |
| FRG1CP      | -0.164 | -0.019 | -0.057 | -0.455 | -0.389 | 0.000574 |
| C12orf48    | -0.504 | -0.234 | -0.23  | -0.383 | -0.442 | 0.000574 |
| FAM24B      | -0.641 | -0.074 | 0.02   | -0.223 | 0.172  | 0.000577 |
| NUP107      | 0.172  | 0.173  | 0.162  | 0.404  | 0.052  | 0.000577 |
| SLC17A5     | 0.229  | 0.129  | 0.118  | 0.256  | 0.359  | 0.000579 |
| ZNF282      | 0.053  | 0.096  | 0.068  | 0.119  | 0.353  | 0.000579 |
| B4GALT6     | 0.139  | 0.265  | 0.132  | 0.174  | 0.661  | 0.000581 |

|             |        |        |        |        |        |          |
|-------------|--------|--------|--------|--------|--------|----------|
| RP3-357D13  | 0.604  | 0.227  | 0.288  | 0.756  | 0.614  | 0.000587 |
| HSPA9       | 0.451  | 0.234  | 0.034  | 0.386  | 0.133  | 0.000587 |
| RP11-454H1  | 0.21   | 0.694  | 0.588  | 0.341  | 0.205  | 0.000592 |
| RHOBTB2     | 0.005  | -0.229 | -0.157 | 0.088  | -0.329 | 0.000593 |
| MATN3       | 0.185  | 0.141  | -0.066 | 0.214  | 0.58   | 0.000595 |
| MICU1       | 0.113  | 0.105  | 0.013  | 0.348  | 0.307  | 0.000595 |
| SHMT2       | 0.085  | 0.035  | 0.075  | 0.375  | 0.077  | 0.000595 |
| EBLN2       | -0.104 | -0.019 | 0.285  | -0.728 | -0.455 | 0.000595 |
| RP11-558F2  | -0.878 | -0.679 | -0.413 | -0.758 | -1.101 | 0.000595 |
| PLEKHG3     | -0.383 | -0.323 | -0.349 | -0.566 | -0.179 | 0.000599 |
| KMT2C       | -0.288 | 0.015  | -0.006 | -0.338 | 0.017  | 0.0006   |
| ERG         | -0.009 | -0.113 | 0.024  | -0.419 | -0.282 | 0.000603 |
| CCDC24      | -0.539 | -0.033 | 0.167  | -0.161 | -0.557 | 0.000611 |
| RP11-769O8  | -0.827 | -0.423 | 0.029  | -0.831 | -0.543 | 0.000612 |
| NUP133      | 0.34   | 0.206  | 0.073  | 0.409  | 0.243  | 0.000614 |
| CTD-2531D1  | 0.21   | -0.158 | -0.345 | -0.117 | 0.117  | 0.000616 |
| NBPF26      | -0.516 | -0.246 | 0.205  | -0.543 | -0.349 | 0.000616 |
| CTC-338M12  | -0.636 | -0.26  | -0.01  | -0.459 | -0.599 | 0.000616 |
| RREB1       | -0.331 | -0.169 | -0.155 | -0.312 | -0.13  | 0.000622 |
| CTA-211A9.5 | -0.549 | 0.103  | 0.2    | -0.318 | -0.27  | 0.000624 |
| C1orf213    | -0.556 | 0.021  | 0.339  | -0.608 | -0.243 | 0.000631 |
| RP11-255C1  | 0.176  | -0.19  | 0.033  | 0.215  | 0.483  | 0.000634 |
| CEP70       | -0.508 | -0.511 | -0.291 | -0.378 | -0.166 | 0.000634 |
| PUM1        | 0.178  | 0.097  | 0.012  | 0.173  | 0.37   | 0.000639 |
| H6PD        | 0.139  | 0.167  | 0.164  | 0.418  | 0.186  | 0.000642 |
| CTC-479C5.1 | -0.536 | -0.151 | -0.087 | -0.813 | -0.544 | 0.000645 |
| NONO        | 0.302  | 0.1    | -0.003 | 0.309  | 0.326  | 0.000647 |
| TCF20       | 0.283  | 0.25   | 0.083  | 0.064  | 0.37   | 0.00065  |
| SRP68       | 0.358  | 0.187  | 0.116  | 0.411  | 0.04   | 0.000652 |
| RP11-685N1  | -0.387 | 0.266  | -0.112 | -0.901 | -0.667 | 0.000652 |
| PFKL        | 0.097  | 0.079  | 0.049  | 0.196  | 0.358  | 0.000653 |
| TEN1-CDK3   | 0.022  | 0.223  | 0.143  | -0.674 | -0.444 | 0.000654 |
| ZNF577      | -0.523 | -0.087 | 0.138  | -0.458 | -0.392 | 0.000655 |
| PSMG4       | -0.393 | -0.179 | -0.12  | -0.422 | -0.351 | 0.000656 |
| TADA2A      | -0.288 | -0.247 | -0.121 | -0.127 | -0.326 | 0.000657 |
| HIGD1A      | -0.173 | -0.084 | -0.126 | -0.325 | -0.483 | 0.000659 |
| ZNF799      | -0.801 | -0.337 | -0.284 | -0.573 | -0.682 | 0.000661 |
| AC092661.2  | -0.266 | -0.291 | -0.551 | -0.508 | -0.576 | 0.000664 |

|            |        |        |        |        |        |          |
|------------|--------|--------|--------|--------|--------|----------|
| KIZ        | 0.095  | 0.436  | 0.217  | 0.225  | -0.161 | 0.000666 |
| RP11-819M1 | 0.159  | -0.217 | -0.212 | 0.146  | -0.412 | 0.000667 |
| UGGT1      | 0.176  | 0.098  | 0.035  | 0.281  | 0.339  | 0.000668 |
| NKAP       | 0.156  | 0.223  | 0.137  | 0.408  | 0.289  | 0.000668 |
| CNOT4      | 0.309  | 0.314  | 0.188  | 0.324  | 0.416  | 0.000669 |
| AC078899.1 | 0.385  | -0.027 | -0.047 | 0.319  | 0.223  | 0.00067  |
| RP11-732A1 | -0.394 | -0.025 | -0.384 | -0.807 | -0.985 | 0.00067  |
| RP11-85F14 | -0.896 | -0.238 | -0.414 | -0.644 | -0.519 | 0.000674 |
| INVS       | -0.331 | -0.044 | 0.061  | -0.097 | -0.06  | 0.000676 |
| RP11-644F5 | -0.338 | 0.067  | 0.214  | -0.491 | -0.464 | 0.000677 |
| MRPS23     | -0.177 | -0.135 | -0.044 | -0.077 | -0.453 | 0.00068  |
| DPM3       | -0.383 | -0.289 | -0.158 | -0.275 | -0.511 | 0.000682 |
| RP11-764E9 | -0.469 | -0.097 | 0.172  | 0.177  | 0.398  | 0.000683 |
| CTD-2196E1 | -0.468 | 0.166  | 0.192  | -0.61  | -0.441 | 0.000689 |
| VDR        | 0.201  | 0.14   | -0.193 | 0.022  | -0.487 | 0.00069  |
| ZNF689     | -0.05  | -0.131 | -0.082 | -0.054 | -0.428 | 0.000692 |
| BEX5       | -0.242 | 0.028  | -0.034 | -0.202 | -0.672 | 0.000693 |
| RP11-10O17 | -0.455 | -0.116 | -0.21  | -0.105 | -0.792 | 0.000693 |
| AQP7P1     | -0.507 | -0.031 | 0.181  | -0.562 | -0.855 | 0.000693 |
| DPY19L4    | -0.269 | -0.16  | -0.136 | -0.282 | -0.34  | 0.000694 |
| CDK5RAP3   | -0.209 | 0.101  | 0.064  | -0.177 | -0.405 | 0.000694 |
| DNAJB5     | -0.116 | -0.123 | -0.343 | -0.225 | 0.091  | 0.000696 |
| SLC37A2    | 0.014  | 0.094  | 0.368  | 0.298  | 0.822  | 0.000698 |
| MIPEP      | 0.207  | 0.149  | -0.123 | 0.348  | 0.235  | 0.000698 |
| AC025171.1 | -0.754 | -0.292 | 0.061  | -0.37  | -0.225 | 0.000702 |
| AC023356.3 | 0.163  | 0.086  | -0.033 | 0.46   | 0.405  | 0.00071  |
| ADAL       | -0.233 | 0      | 0.282  | 0.324  | 0.251  | 0.000716 |
| RGS14      | -0.557 | -0.399 | -0.207 | -0.332 | -0.531 | 0.000716 |
| TBC1D7     | -0.126 | -0.214 | -0.309 | -0.146 | -0.409 | 0.000718 |
| AC009302.3 | 0.514  | 0.046  | 0.054  | 0.4    | 0.049  | 0.000723 |
| RP11-476C8 | 0.394  | -0.092 | -0.053 | 0.329  | 0.318  | 0.000726 |
| LRRC70     | -0.329 | -0.394 | -0.44  | -0.673 | -0.57  | 0.000728 |
| HLA-DPB1   | 0.306  | 0.085  | 0.037  | 0.172  | -0.454 | 0.000729 |
| RP11-132A1 | -0.369 | -0.487 | -0.397 | -0.4   | -0.995 | 0.00073  |
| RP11-30E17 | -0.671 | 0.055  | 0.344  | -0.045 | -0.463 | 0.000741 |
| COBLL1     | 0.324  | 0.333  | 0.022  | 0.203  | 0.037  | 0.000746 |
| CCDC18     | -0.388 | -0.24  | -0.134 | -0.145 | -0.211 | 0.000747 |
| AC005306.3 | -0.067 | 0.23   | -0.035 | -0.704 | -0.509 | 0.000747 |



|              |        |        |        |        |        |          |
|--------------|--------|--------|--------|--------|--------|----------|
| ADRB1        | -0.094 | 0.053  | 0.203  | 0.213  | -0.34  | 0.000749 |
| CTD-2267D1   | -0.247 | -0.023 | 0.228  | 0.477  | 0.212  | 0.000755 |
| NPEPL1       | -0.266 | 0.142  | 0.185  | -0.034 | 0.43   | 0.000756 |
| KLHDC1       | -0.492 | 0.265  | 0.449  | -0.139 | 0.112  | 0.000757 |
| RB1          | 0.367  | 0.216  | -0.025 | 0.249  | 0.258  | 0.000762 |
| RP4-775C13   | 0.375  | -0.042 | -0.107 | 0.269  | 0.13   | 0.000763 |
| RP11-288H1   | -0.277 | -0.192 | 0.013  | -0.701 | -0.816 | 0.000769 |
| CIAPIN1P     | 0.315  | -0.003 | -0.152 | 0.362  | 0.094  | 0.000772 |
| RP11-658F2   | -0.05  | 0.021  | 0.512  | -0.089 | 0.028  | 0.000773 |
| DCXR         | -0.093 | -0.101 | -0.228 | -0.14  | -0.406 | 0.000775 |
| RP5-855D21   | -0.057 | 0.075  | 0.261  | -0.752 | -0.385 | 0.000778 |
| CFL1         | 0.34   | 0.057  | -0.052 | 0.298  | 0.232  | 0.00078  |
| FBXL14       | 0.008  | -0.329 | -0.374 | 0.029  | 0.108  | 0.000781 |
| SPOP         | 0.049  | 0.131  | 0.164  | 0.326  | 0.167  | 0.000782 |
| HSD17B8      | -0.226 | 0.035  | -0.111 | -0.374 | -0.747 | 0.000785 |
| RNF20        | 0.148  | 0.055  | 0.163  | 0.461  | 0.313  | 0.000789 |
| EFTUD2       | 0.404  | 0.167  | 0.016  | 0.414  | 0.33   | 0.00079  |
| DUS4L        | -0.421 | -0.132 | 0.215  | 0.049  | -0.029 | 0.000792 |
| ZNHIT6       | 0.146  | 0.291  | 0.222  | 0.345  | 0.161  | 0.000794 |
| XRCC1        | 0.015  | -0.042 | -0.037 | 0.389  | -0.054 | 0.000796 |
| PCED1B       | 0.073  | 0.155  | -0.003 | 0.583  | 0.83   | 0.000797 |
| STXBP1       | 0.186  | 0.008  | 0.087  | 0.278  | 0.338  | 0.000798 |
| SLFN13       | 0.141  | -0.216 | -0.091 | -0.269 | -0.493 | 0.0008   |
| IDH2         | 0.3    | 0.132  | -0.007 | 0.294  | 0.368  | 0.000808 |
| ADORA2B      | 0.16   | -0.111 | 0.068  | 0.389  | 0.523  | 0.00081  |
| RP11-77H9.5  | -0.655 | -0.118 | -0.134 | -1.105 | -0.583 | 0.000811 |
| RP11-359B1   | -0.182 | -0.056 | 0      | 0.097  | 0.855  | 0.000816 |
| ZNF846       | -0.043 | 0.479  | 0.521  | 0.281  | 0.614  | 0.000816 |
| KLHL15       | 0.183  | -0.115 | -0.292 | -0.205 | -0.372 | 0.000821 |
| MRPL57       | -0.271 | -0.337 | -0.153 | -0.191 | -0.359 | 0.000825 |
| LCORL        | -0.138 | -0.208 | -0.443 | -0.376 | -0.199 | 0.000832 |
| RP6-159A1.2  | 0.138  | -0.172 | -0.398 | -0.027 | -0.806 | 0.000834 |
| RAB11FIP3    | 0.175  | 0.094  | 0.071  | 0.115  | 0.337  | 0.000835 |
| AC012318.3   | -0.035 | 0.095  | -0.029 | -0.46  | -0.58  | 0.000839 |
| RP11-47311.9 | 0.261  | 0.142  | 0.101  | 0.131  | 0.325  | 0.000841 |
| SNORA69      | -0.138 | -0.136 | -0.179 | -1.017 | -0.754 | 0.000845 |
| NUDT8        | 0.126  | 0.533  | 0.473  | 0.571  | 0.623  | 0.000846 |
| HSPE1        | -0.297 | -0.249 | -0.115 | -0.529 | -0.46  | 0.000846 |

|             |        |        |        |        |        |          |
|-------------|--------|--------|--------|--------|--------|----------|
| AATF        | 0.4    | 0.173  | 0.12   | 0.518  | 0.105  | 0.000851 |
| RP4-541C22  | 0.341  | 0.51   | 0.742  | -0.022 | -0.093 | 0.000851 |
| PLAA        | 0.399  | 0.197  | 0.038  | 0.293  | 0.044  | 0.000852 |
| AP000689.8  | -0.721 | -0.088 | -0.344 | -0.739 | -0.857 | 0.000856 |
| NDUFV2      | -0.114 | -0.107 | -0.122 | -0.287 | -0.41  | 0.00086  |
| ANG         | 0.268  | -0.093 | -0.353 | -0.113 | -0.633 | 0.00086  |
| EPRS        | 0.399  | 0.184  | 0.07   | 0.56   | 0.312  | 0.000862 |
| TTC28-AS1   | -0.432 | -0.17  | 0.036  | -0.435 | -0.346 | 0.000864 |
| CORO6       | -0.327 | 0.239  | 0.139  | -0.616 | 0.087  | 0.000867 |
| TM7SF2      | -0.178 | -0.068 | -0.135 | -0.273 | 0.332  | 0.000869 |
| PDIK1L      | -0.474 | -0.116 | -0.272 | -0.428 | -0.489 | 0.000871 |
| RP11-213G2  | -0.484 | 0.182  | 0.001  | -0.416 | -0.304 | 0.000872 |
| OSBPL11     | 0.333  | 0.188  | -0.061 | 0.201  | -0.053 | 0.000873 |
| AC010733.8  | -0.193 | 0.137  | 0.192  | -0.737 | -0.692 | 0.000877 |
| RP11-1033H  | 0.208  | -0.128 | 0.194  | 0.541  | 0.834  | 0.000883 |
| CNP         | 0.295  | 0.094  | -0.054 | 0.334  | 0.32   | 0.000884 |
| SNORD38A    | -0.503 | -0.199 | 0.132  | -0.824 | -0.895 | 0.000885 |
| METTL1      | 0.116  | 0.065  | 0.032  | -0.007 | -0.354 | 0.000889 |
| RP11-198P1  | 0.194  | -0.109 | -0.066 | 0.3    | 0.336  | 0.00089  |
| GDF11       | -0.294 | 0.021  | 0.114  | -0.338 | -0.057 | 0.000891 |
| CCDC107     | -0.214 | -0.182 | -0.096 | -0.03  | -0.384 | 0.000891 |
| RP11-611O2  | 0.744  | 0.702  | 1.175  | 0.139  | 0.522  | 0.000896 |
| ZBTB42      | 0.194  | 0.097  | -0.002 | 0.035  | 0.507  | 0.000905 |
| PTENP1      | 0.223  | 0.188  | 0.17   | 0.352  | 0.437  | 0.000907 |
| AQR         | 0.298  | 0.231  | 0.119  | 0.407  | 0.321  | 0.000913 |
| MTRNR2L12   | -0.434 | -0.47  | 0.116  | -0.945 | -0.676 | 0.000916 |
| UHRF1BP1    | 0.343  | 0.04   | 0.015  | 0.123  | 0.057  | 0.000917 |
| GNA14       | 0.755  | -0.188 | 0.083  | 0.437  | 0.266  | 0.000921 |
| AC008982.2  | -0.39  | -0.168 | 0.067  | -0.522 | -1.004 | 0.000921 |
| PES1        | 0.339  | 0.098  | -0.013 | 0.318  | 0.03   | 0.000923 |
| RP11-616L1: | 0.15   | 0.241  | -0.618 | -0.511 | -0.268 | 0.000933 |
| CTD-2647L4  | -0.419 | -0.072 | -0.119 | -0.828 | -0.562 | 0.000933 |
| SNHG6       | -0.233 | -0.085 | -0.008 | -0.427 | -0.489 | 0.000936 |
| FGFR1OP2    | -0.183 | -0.072 | -0.131 | -0.274 | -0.389 | 0.000938 |
| ZNF675      | 0.052  | -0.179 | -0.404 | -0.488 | -0.003 | 0.000939 |
| SNORD56     | -0.059 | 0.071  | 0.054  | -0.784 | -0.851 | 0.000942 |
| RP13-582O9  | -0.649 | 0.086  | 0.138  | -0.427 | -0.679 | 0.000949 |
| WDR1        | 0.394  | 0.111  | -0.042 | 0.35   | 0.232  | 0.00095  |

|             |        |        |        |        |        |          |
|-------------|--------|--------|--------|--------|--------|----------|
| KTN1-AS1    | -0.15  | -0.601 | -0.349 | -0.39  | -0.856 | 0.00095  |
| ZCCHC18     | -0.385 | -0.303 | -0.199 | -0.184 | 0.418  | 0.000951 |
| HOXB8       | -0.566 | -0.49  | -0.259 | -0.142 | -0.362 | 0.000951 |
| AC073869.1  | 0.236  | -0.06  | -0.33  | 0.124  | 0.4    | 0.000954 |
| EXOSC4      | -0.275 | -0.077 | 0.025  | 0.194  | -0.328 | 0.000956 |
| STRBP       | 0.091  | 0.179  | 0.178  | 0.388  | 0.403  | 0.000962 |
| ZNF74       | -0.356 | 0.016  | -0.069 | -0.125 | 0.149  | 0.000963 |
| RP11-163M2  | 0.397  | -0.246 | -0.076 | 0.038  | -0.027 | 0.00097  |
| RP11-10L12. | -0.222 | -0.234 | -0.288 | -0.665 | -0.99  | 0.000973 |
| CCT5        | 0.3    | 0.054  | -0.039 | 0.353  | 0.191  | 0.000979 |
| HTATSF1     | 0.397  | 0.211  | 0.134  | 0.422  | 0.11   | 0.000981 |
| OSBPL2      | 0.063  | 0.235  | 0.23   | 0.116  | 0.343  | 0.000982 |
| KCTD18      | -0.409 | -0.06  | 0.181  | 0.046  | -0.138 | 0.00099  |
| SSRP1       | 0.344  | 0.098  | -0.024 | 0.314  | 0.005  | 0.000991 |
| CENPV       | -0.064 | -0.233 | -0.257 | -0.603 | -0.188 | 0.000992 |
| RP11-613F7  | -0.553 | -0.487 | -0.237 | -0.702 | -0.573 | 0.000992 |
| RP11-706O1  | -0.049 | 0.101  | 0.265  | -0.512 | 0.056  | 0.000993 |
| STAMPB      | 0.082  | -0.02  | 0.08   | 0.335  | 0.114  | 0.000998 |
| PKP2        | 0.001  | 0.098  | 0.417  | 0.591  | 0.376  | 0.000999 |
| CTD-2192J10 | -0.124 | -0.334 | -0.295 | -0.2   | -0.072 | 0.001    |
| CTBP1-AS1   | -0.426 | -0.135 | -0.215 | -0.261 | -0.43  | 0.001    |
| CTA-29F11.1 | -0.298 | -0.452 | -0.422 | -0.557 | -0.895 | 0.001    |
| PAK1        | 0.165  | 0.163  | -0.087 | 0.138  | 0.488  | 0.00101  |
| PRKCSH      | 0.173  | 0.015  | -0.027 | 0.31   | 0.34   | 0.00101  |
| HADH        | 0.125  | 0.124  | 0.11   | 0.401  | 0.126  | 0.00101  |
| TSEN15      | -0.208 | -0.115 | -0.079 | -0.077 | -0.372 | 0.00101  |
| CTRL        | -0.446 | 0.01   | 0.106  | -0.737 | -0.597 | 0.00101  |
| RP11-195O1  | -0.266 | -0.083 | -0.028 | -0.494 | -0.652 | 0.00101  |
| SNORA41     | 0.158  | 0.016  | 0.225  | -0.74  | -0.685 | 0.00101  |
| RP1-69D17.4 | -0.629 | -0.179 | -0.725 | -1.055 | -0.821 | 0.00101  |
| HSP90AB1    | 0.495  | 0.16   | -0.002 | 0.458  | 0.341  | 0.00102  |
| AC093734.1  | -0.372 | 0.01   | 0.516  | 0.188  | 0.114  | 0.00102  |
| LRP5        | 0.073  | 0.001  | 0.087  | 0.41   | 0.037  | 0.00103  |
| RP11-488C1  | -0.335 | 0.163  | 0.175  | -0.481 | -0.079 | 0.00103  |
| SURF2       | -0.061 | -0.188 | -0.12  | -0.04  | -0.457 | 0.00103  |
| RNU6-301P   | -0.293 | 0.409  | 0.293  | -0.278 | 0.663  | 0.00104  |
| TDRD3       | 0.015  | -0.013 | 0.021  | 0.103  | -0.355 | 0.00104  |
| SNORD54     | 0.098  | 0.223  | 0.101  | -0.646 | -0.637 | 0.00104  |

|             |        |        |        |        |        |         |
|-------------|--------|--------|--------|--------|--------|---------|
| LARP4P      | -0.069 | -0.331 | -0.281 | -0.275 | -0.749 | 0.00104 |
| RP5-1092A3  | -0.191 | 0.124  | 0.754  | -0.082 | 0.079  | 0.00105 |
| RP11-305E1  | -0.098 | -0.554 | -0.059 | 0.095  | 0.069  | 0.00105 |
| RHBDL1      | -0.32  | 0.038  | 0.411  | -0.27  | -0.5   | 0.00105 |
| FOXRED2     | 0.162  | 0.113  | 0.145  | 0.426  | 0.29   | 0.00106 |
| SEC23B      | 0.392  | 0.182  | 0.106  | 0.408  | -0.092 | 0.00106 |
| MTHFD1      | 0.337  | 0.075  | -0.063 | 0.312  | -0.098 | 0.00106 |
| COA5        | -0.562 | -0.095 | 0.042  | -0.317 | -0.283 | 0.00106 |
| CTD-2619J1  | -0.415 | 0.256  | 0.12   | -0.613 | -0.638 | 0.00106 |
| RP3-488M23  | -0.166 | -0.012 | 0.748  | 0.472  | 0.838  | 0.00107 |
| FAM71F2     | 0.472  | 0.271  | 0.717  | -0.229 | 0.702  | 0.00107 |
| SLC35C1     | 0.252  | 0.038  | 0.118  | 0.273  | 0.438  | 0.00107 |
| AGA         | 0.17   | 0.213  | 0.13   | 0.375  | 0.365  | 0.00107 |
| BBS4        | 0.123  | 0.269  | 0.314  | 0.498  | 0.181  | 0.00107 |
| NBPF14      | -0.365 | -0.205 | 0.143  | -0.685 | -0.007 | 0.00108 |
| PMS2L1      | -0.217 | -0.284 | -0.21  | -0.369 | -0.401 | 0.00108 |
| RP1-90L14.1 | -0.686 | -0.117 | 0.165  | -0.842 | -0.581 | 0.00108 |
| SF3A1       | 0.423  | 0.139  | 0.123  | 0.468  | 0.395  | 0.00109 |
| AC006116.2  | 0.435  | 0.022  | -0.063 | -0.224 | -0.577 | 0.00109 |
| SEPW1       | -0.318 | -0.171 | -0.042 | -0.429 | 0.09   | 0.0011  |
| AC004074.3  | -0.196 | -0.252 | -0.251 | -0.4   | -0.486 | 0.0011  |
| FRS3        | -0.151 | -0.084 | -0.138 | -0.421 | -0.552 | 0.0011  |
| RP11-347C1  | -0.268 | -0.105 | 0.001  | -0.773 | -0.7   | 0.0011  |
| CHD6        | 0.094  | 0.099  | 0.1    | 0.005  | 0.341  | 0.00111 |
| RP11-81A1.2 | 0.35   | 0.444  | 0.366  | 0.667  | 0.655  | 0.00112 |
| PLEKHN1     | -0.246 | -0.118 | 0.439  | 0.041  | 0.398  | 0.00112 |
| RP11-281P2  | -0.601 | -0.466 | -0.403 | -0.925 | 0.068  | 0.00112 |
| AC064850.4  | 0.221  | -0.216 | -0.09  | 0.364  | 0.137  | 0.00113 |
| TMEM177     | -0.463 | -0.201 | -0.294 | -0.295 | -0.274 | 0.00113 |
| HAUS1       | -0.222 | -0.021 | -0.075 | -0.295 | -0.419 | 0.00113 |
| RP11-343H5  | -0.083 | -0.356 | -0.105 | -0.544 | -0.432 | 0.00113 |
| COPG2       | 0.415  | 0.221  | 0.056  | 0.478  | 0.098  | 0.00115 |
| RP11-758P1  | -0.299 | 0.417  | 0.422  | -0.41  | -0.573 | 0.00115 |
| VPS72       | 0.133  | 0.076  | 0.073  | 0.431  | 0.287  | 0.00116 |
| PYY2        | -0.223 | 0.75   | 0.735  | -0.087 | 0.177  | 0.00116 |
| ORC4        | -0.387 | -0.071 | -0.029 | -0.008 | 0.008  | 0.00116 |
| AC005255.3  | -0.148 | -0.076 | -0.057 | -0.325 | -0.483 | 0.00116 |
| AC068492.3  | 0.428  | -0.006 | -0.131 | 0.29   | 0.316  | 0.00117 |

|            |        |        |        |        |        |         |
|------------|--------|--------|--------|--------|--------|---------|
| RP11-452L6 | -0.764 | 0.09   | 0.241  | -0.022 | -0.493 | 0.00117 |
| PPIL4      | 0.215  | 0.19   | 0.147  | 0.41   | 0.218  | 0.00118 |
| LRRC75A    | -0.642 | -0.473 | -0.202 | -0.264 | 0.024  | 0.00118 |
| RP11-365P1 | 0.466  | -0.101 | -0.105 | 0.266  | -0.006 | 0.00118 |
| ANKRD44    | -0.258 | 0.191  | 0.184  | -0.077 | 0.468  | 0.00119 |
| ST6GALNAC  | -0.309 | 0.1    | -0.078 | -0.001 | 0.329  | 0.00119 |
| AC156455.1 | -0.199 | 0.01   | -0.006 | -0.362 | -0.797 | 0.00119 |
| SNORA71B   | -0.421 | -0.205 | -0.114 | -0.859 | -0.961 | 0.00119 |
| RP11-365K2 | -0.39  | -0.57  | -0.401 | -0.552 | -0.087 | 0.0012  |
| RP11-255N2 | 0.329  | 0.012  | -0.052 | -0.127 | -0.426 | 0.0012  |
| ZNF169     | -0.287 | -0.17  | 0.045  | -0.584 | -0.462 | 0.0012  |
| IGF2       | 0.231  | -0.019 | -0.231 | -0.115 | -0.633 | 0.0012  |
| AC122136.1 | -0.237 | -0.176 | -0.114 | -0.36  | -0.155 | 0.00121 |
| CEP192     | -0.34  | -0.164 | -0.092 | -0.066 | -0.19  | 0.00121 |
| MIR4691    | -0.455 | 0      | -0.189 | -0.979 | -0.77  | 0.00121 |
| ENO1       | 0.366  | 0.079  | -0.023 | 0.426  | 0.303  | 0.00122 |
| ZNF658     | -0.573 | 0.15   | 0.075  | -0.219 | -0.162 | 0.00122 |
| FAM95B1    | -0.098 | 0.279  | 0.648  | -0.456 | -0.294 | 0.00122 |
| AC010746.4 | 0.474  | -0.029 | -0.097 | 0.205  | 0.013  | 0.00123 |
| CEBPB      | 0.126  | 0.014  | 0.124  | 0.182  | 0.533  | 0.00124 |
| RP11-282O1 | -0.159 | 0.006  | 0.305  | -0.048 | 0.391  | 0.00124 |
| ARMCX1     | 0.178  | 0.07   | 0.187  | 0.36   | 0.116  | 0.00124 |
| RP11-118D2 | 0.155  | -0.137 | -0.342 | 0.009  | -0.336 | 0.00125 |
| DDX21      | 0.441  | 0.158  | -0.071 | 0.211  | 0.074  | 0.00126 |
| ZNF784     | 0.388  | 0.079  | -0.214 | -0.067 | -0.092 | 0.00126 |
| SNRPE      | -0.205 | -0.068 | 0.013  | -0.369 | -0.399 | 0.00126 |
| ECD        | 0.367  | 0.11   | -0.029 | 0.323  | 0.113  | 0.00127 |
| ACTB       | 0.451  | 0.073  | -0.133 | 0.26   | 0.092  | 0.00127 |
| XRCC4      | 0.174  | 0.099  | 0.162  | 0.354  | -0.108 | 0.00127 |
| TCEAL1     | -0.303 | -0.114 | -0.119 | -0.048 | -0.322 | 0.00127 |
| RPL9       | -0.214 | -0.081 | -0.069 | -0.472 | -0.461 | 0.00127 |
| AADAC      | -0.337 | 0.275  | 0.277  | -0.497 | -0.057 | 0.00128 |
| TMEM14C    | -0.183 | 0.026  | 0.131  | 0.034  | 0.356  | 0.00129 |
| TMEM45A    | 0.181  | 0.042  | -0.082 | -0.123 | -0.428 | 0.00129 |
| RP11-349A2 | -0.253 | -0.141 | 0.107  | -0.437 | -0.263 | 0.0013  |
| C16orf91   | -0.023 | -0.026 | -0.198 | 0.009  | -0.369 | 0.0013  |
| RP1-278E11 | -0.204 | -0.307 | -0.104 | -0.326 | -0.438 | 0.0013  |
| RP13-503K1 | 0.335  | -0.205 | -0.24  | -0.082 | 0.009  | 0.00131 |

|              |        |        |        |        |        |         |
|--------------|--------|--------|--------|--------|--------|---------|
| YJEFN3       | -0.224 | -0.091 | 0.523  | -0.591 | -0.02  | 0.00131 |
| HOXA13       | -0.04  | -0.358 | -0.416 | 0.057  | -0.426 | 0.00131 |
| SNORD6       | -0.227 | -0.165 | -0.026 | -0.863 | -0.89  | 0.00131 |
| RP5-1102E8   | 0.284  | 0.057  | -0.001 | 0.395  | 0.102  | 0.00132 |
| RP11-90H3.1  | 0.407  | -0.014 | -0.029 | 0.347  | 0.084  | 0.00132 |
| RP11-686D2   | 0.085  | -0.025 | -0.042 | -0.507 | -0.699 | 0.00132 |
| RP11-104N1   | -0.556 | 0.295  | 0.434  | 0.181  | 0.656  | 0.00134 |
| SEC23IP      | 0.239  | 0.133  | 0.108  | 0.37   | 0.361  | 0.00134 |
| TMEM161A     | -0.028 | -0.014 | -0.081 | -0.011 | -0.364 | 0.00134 |
| SCX          | 0.176  | -0.432 | -0.367 | -0.85  | 0.181  | 0.00135 |
| AIFM1        | 0.339  | 0.087  | -0.092 | 0.367  | 0.172  | 0.00135 |
| FAM200B      | -0.526 | -0.178 | 0.037  | -0.366 | -0.058 | 0.00135 |
| CTD-2033D2   | 0.301  | 0.001  | 0.097  | 0.59   | 0.538  | 0.00136 |
| ZNF619       | -0.352 | 0.139  | 0.012  | -0.05  | -0.239 | 0.00136 |
| PSMA5        | -0.137 | -0.046 | -0.03  | -0.256 | -0.387 | 0.00136 |
| RP11-812E1   | -0.75  | -0.401 | -0.005 | 0.155  | -0.872 | 0.00136 |
| FBXO21       | 0.375  | 0.198  | -0.005 | 0.334  | 0.369  | 0.00138 |
| TMEM129      | -0.357 | -0.056 | -0.153 | -0.11  | -0.017 | 0.00138 |
| ZNF35        | 0.362  | 0.183  | 0.084  | -0.016 | 0.066  | 0.0014  |
| SLC35A5      | -0.224 | -0.109 | -0.02  | -0.141 | -0.418 | 0.0014  |
| C9orf3       | -0.128 | -0.181 | -0.149 | -0.474 | -0.414 | 0.00141 |
| MMAA         | -0.291 | 0.093  | 0.059  | 0.335  | 0.091  | 0.00142 |
| RPS7         | -0.203 | -0.048 | -0.034 | -0.401 | -0.42  | 0.00142 |
| SMIM8        | -0.603 | -0.094 | -0.285 | -0.528 | -0.506 | 0.00142 |
| RP11-1217F.1 | -0.037 | -0.13  | -0.044 | -0.378 | -0.679 | 0.00143 |
| CTD-3018O1   | 0.073  | 0.031  | 0.445  | 0.417  | 1.026  | 0.00144 |
| RF00569      | -0.516 | 0.048  | 0.094  | -0.714 | -0.586 | 0.00144 |
| ADCK2        | 0.041  | 0.137  | 0.222  | 0.323  | 0.04   | 0.00146 |
| GHRLOS2      | -0.161 | 0.394  | 0.505  | -0.568 | -0.155 | 0.00146 |
| POLRMT       | -0.372 | -0.13  | -0.057 | -0.175 | -0.289 | 0.00146 |
| RP5-857K21   | -0.425 | -0.146 | 0.274  | -0.824 | -0.699 | 0.00146 |
| MIR4784      | -0.566 | 0.133  | 0.07   | -0.653 | -0.825 | 0.00146 |
| GABBR2       | 0.387  | 0.032  | -0.013 | 0.353  | 0.478  | 0.00147 |
| SETD6        | -0.301 | -0.361 | -0.002 | -0.617 | -0.345 | 0.00147 |
| RP11-893F2   | -0.407 | -0.251 | 0.769  | -0.067 | -0.06  | 0.00148 |
| RP11-214K3   | -0.253 | 0.184  | 0.6    | -0.537 | -0.4   | 0.00148 |
| ALKBH6       | -0.354 | 0.135  | 0.225  | -0.414 | -0.505 | 0.00148 |
| CTC-260E6.1  | -0.216 | -0.299 | -0.1   | -0.406 | -0.359 | 0.00149 |

|              |        |        |        |        |        |         |
|--------------|--------|--------|--------|--------|--------|---------|
| RNH1         | 0.226  | 0.027  | -0.036 | 0.334  | 0.364  | 0.0015  |
| GXYLT1       | -0.027 | 0.14   | 0.123  | -0.374 | -0.136 | 0.0015  |
| CCDC86       | 0.131  | -0.079 | -0.104 | 0.256  | 0.329  | 0.00151 |
| TTC26        | 0.196  | 0.09   | 0.225  | 0.503  | 0.22   | 0.00151 |
| RP11-3D23.1  | 0.469  | 0.048  | 0.148  | 0.336  | 0.156  | 0.00151 |
| ZNF341       | -0.19  | -0.484 | 0.144  | -0.034 | -0.182 | 0.00151 |
| CCDC134      | -0.231 | -0.074 | -0.121 | 0.072  | -0.508 | 0.00151 |
| COX7A2       | -0.418 | -0.191 | -0.059 | -0.593 | -0.657 | 0.00151 |
| LINC00476    | -0.712 | -0.286 | -0.083 | -0.393 | -0.122 | 0.00152 |
| SNORD17      | -0.113 | -0.005 | -0.27  | -0.671 | -0.699 | 0.00152 |
| SDPR         | -0.382 | 0.149  | -0.108 | 0.102  | 0.128  | 0.00153 |
| DMC1         | 0.095  | 0.05   | -0.119 | -0.179 | -0.695 | 0.00153 |
| ATP5A1P3     | 0.274  | -0.035 | -0.006 | 0.371  | 0.243  | 0.00154 |
| MRPL36       | -0.176 | -0.304 | -0.203 | -0.231 | -0.359 | 0.00154 |
| RAB28        | -0.088 | -0.048 | 0.07   | -0.036 | -0.382 | 0.00155 |
| CLEC12B      | -0.318 | -0.217 | -0.165 | -0.374 | -0.761 | 0.00155 |
| RAB43        | -0.275 | -0.043 | -0.167 | -0.091 | 0.568  | 0.00156 |
| ATP1A1       | 0.297  | 0.146  | 0.008  | 0.373  | 0.299  | 0.00156 |
| CREB3L4      | -0.295 | -0.051 | 0.222  | 0.326  | 0.041  | 0.00156 |
| STXBP3       | 0.222  | 0.322  | 0.184  | 0.227  | 0.168  | 0.00157 |
| DFFB         | -0.376 | -0.024 | 0.055  | -0.183 | -0.15  | 0.00157 |
| ZNF785       | -0.406 | -0.125 | -0.062 | -0.382 | -0.197 | 0.00157 |
| RP11-21A7A   | -0.575 | 0.188  | 0.211  | -0.725 | -0.54  | 0.00158 |
| AP1G1        | 0.299  | 0.234  | 0.107  | 0.336  | 0.337  | 0.00159 |
| SNORA53      | -0.378 | 0.096  | -0.124 | -0.915 | -0.778 | 0.00159 |
| MIR137HG     | -0.576 | -0.211 | -0.089 | -0.268 | -0.482 | 0.0016  |
| RP11-715J2.1 | -0.178 | -0.33  | -0.077 | -0.339 | -0.379 | 0.00161 |
| LRP3         | -0.043 | -0.13  | -0.351 | -0.313 | -0.022 | 0.00162 |
| PSMA3        | -0.149 | -0.043 | -0.019 | -0.162 | -0.439 | 0.00162 |
| HSD3B7       | -0.175 | -0.173 | 0.316  | 0.029  | 0.343  | 0.00163 |
| GRAMD4       | -0.008 | 0.321  | 0.237  | 0.169  | 0.393  | 0.00164 |
| SRSF5        | 0.061  | 0.07   | 0.126  | -0.389 | -0.047 | 0.00165 |
| FAM98B       | 0.42   | 0.206  | 0.088  | 0.363  | 0.098  | 0.00166 |
| LRRC75B      | -0.44  | 0.029  | -0.039 | -0.492 | 0.062  | 0.00166 |
| MEG8         | -0.218 | 0.207  | 0.265  | -0.49  | -0.277 | 0.00167 |
| PRELID3B     | -0.293 | -0.168 | -0.108 | -0.262 | -0.364 | 0.00167 |
| EIF5B        | 0.344  | 0.261  | 0.168  | 0.408  | 0.35   | 0.00168 |
| USP14        | 0.371  | 0.206  | 0.103  | 0.406  | 0.315  | 0.00168 |

|             |        |        |        |        |        |         |
|-------------|--------|--------|--------|--------|--------|---------|
| DCPS        | 0.348  | 0.072  | -0.164 | 0.202  | -0.088 | 0.00168 |
| RP11-244H3  | -0.076 | -0.03  | 0.271  | -0.918 | -0.244 | 0.00168 |
| RP11-641A6  | -0.01  | -0.025 | 0.056  | 0.41   | 0.43   | 0.00169 |
| FAM201A     | -0.219 | 0.024  | 0.27   | -0.139 | -0.644 | 0.0017  |
| FAM229A     | 0.204  | 0.03   | 0.35   | -0.32  | 0.863  | 0.00171 |
| NDUFA6      | -0.141 | -0.146 | -0.164 | -0.14  | -0.336 | 0.00171 |
| RP11-680G2  | 0.256  | -0.011 | -0.077 | 0.439  | 0.598  | 0.00174 |
| BGN         | 0.361  | 0.048  | -0.124 | 0.322  | 0.284  | 0.00175 |
| CS          | 0.34   | 0.168  | 0.021  | 0.281  | 0.163  | 0.00175 |
| SF3B4       | 0.345  | 0.088  | -0.048 | 0.276  | -0.008 | 0.00175 |
| APIP        | -0.236 | -0.152 | -0.012 | -0.204 | -0.485 | 0.00175 |
| CNR1        | 0.297  | -0.116 | -0.155 | 0.148  | -0.477 | 0.00177 |
| RP3-402G11  | -0.485 | 0.395  | -0.282 | -0.453 | -0.511 | 0.00177 |
| ZNF143      | 0.008  | 0.168  | 0.14   | 0.28   | 0.378  | 0.00178 |
| SNAI1       | 0.589  | 0.052  | 0.166  | 0.33   | 0.156  | 0.00182 |
| ISOC1       | 0.422  | 0.251  | 0.064  | 0.241  | 0.129  | 0.00183 |
| RP11-108A1  | 0.01   | -0.27  | -0.379 | -0.021 | -0.489 | 0.00183 |
| DDX39B      | -0.109 | -0.106 | 0.002  | -0.426 | -0.557 | 0.00183 |
| KCNIP4      | -0.292 | -0.465 | -0.513 | -0.187 | -1.041 | 0.00183 |
| CTB-52I2.4  | 0.399  | 0.085  | 0.085  | 0.302  | 0.149  | 0.00184 |
| TTLL7       | -0.007 | 0.219  | 0.32   | 0.008  | -0.434 | 0.00184 |
| MIR222      | -0.557 | 0.357  | 0.368  | -0.555 | -0.028 | 0.00185 |
| EGLN2       | -0.149 | -0.061 | -0.21  | -0.424 | -0.256 | 0.00185 |
| RP4-563E14  | -0.7   | 0.156  | -0.426 | -0.913 | -0.577 | 0.00186 |
| C19orf76    | -0.622 | -0.322 | -0.375 | -0.824 | -0.936 | 0.00186 |
| POMK        | -0.245 | -0.338 | -0.361 | -0.389 | -0.65  | 0.00188 |
| RP1-228P16  | -0.522 | 0.095  | -0.08  | -0.765 | -0.701 | 0.00188 |
| KBTBD4      | 0.017  | 0.084  | -0.029 | 0.368  | 0.09   | 0.0019  |
| RP11-574K1  | -0.51  | 0.12   | 0.378  | -0.515 | -0.369 | 0.00191 |
| CRNDE       | -0.443 | 0.052  | -0.132 | -0.635 | -0.385 | 0.00191 |
| CTA-276O3.4 | -0.501 | -0.482 | -0.323 | -0.901 | -0.851 | 0.00192 |
| RFC1        | 0.342  | 0.131  | -0.035 | 0.175  | 0.134  | 0.00193 |
| SEPT15      | -0.217 | -0.029 | -0.07  | -0.452 | -0.469 | 0.00193 |
| CTD-2349P2  | 0.215  | -0.089 | 0.093  | -0.795 | -0.5   | 0.00194 |
| GSTM2       | -0.069 | 0.184  | 0.333  | -0.117 | 0.693  | 0.00195 |
| BISPR       | -0.321 | -0.242 | 0.217  | 0.016  | 0.358  | 0.00195 |
| TPT1-AS1    | -0.297 | -0.128 | 0.065  | -0.552 | -0.025 | 0.00195 |
| ZNF124      | 0.278  | -0.138 | -0.379 | -0.268 | 0.061  | 0.00196 |



|              |        |        |        |        |        |         |
|--------------|--------|--------|--------|--------|--------|---------|
| CLASP1       | -0.019 | 0.027  | 0.075  | 0.167  | 0.323  | 0.00198 |
| TFG          | 0.331  | 0.079  | -0.007 | 0.274  | 0.27   | 0.00198 |
| RP11-386I14  | -0.183 | -0.45  | -0.226 | -0.421 | -0.243 | 0.00198 |
| SNORD12B     | -0.031 | 0.038  | 0.08   | -0.851 | -0.615 | 0.00198 |
| USP32        | 0.189  | 0.098  | 0.217  | 0.34   | 0.207  | 0.00199 |
| CTD-2331H7   | 0.164  | -0.362 | -0.427 | -0.296 | -0.473 | 0.00199 |
| CTB-50L17.1  | 0.077  | 0      | -0.006 | 0.261  | 0.35   | 0.002   |
| RP11-266K4   | -0.199 | 0.7    | 0.77   | 0.099  | 0.121  | 0.002   |
| DDX19A       | 0.342  | 0.165  | 0.045  | 0.433  | 0.11   | 0.002   |
| U47924.31    | -0.081 | -0.47  | -0.692 | -0.342 | -1.033 | 0.002   |
| CTD-2078B5   | 0.343  | -0.312 | 0.161  | 0.321  | 0.916  | 0.00201 |
| GPKOW        | 0.351  | 0.231  | 0.127  | 0.525  | 0.163  | 0.00201 |
| C19orf68     | -0.406 | -0.077 | 0.136  | -0.557 | -0.22  | 0.00202 |
| NCRNA0010    | -0.772 | -0.213 | -0.145 | -0.998 | -0.63  | 0.00202 |
| RP11-567P1   | 0.252  | 0.143  | 0.227  | 0.298  | 0.417  | 0.00203 |
| TPI1         | 0.251  | 0.072  | -0.021 | 0.345  | 0.081  | 0.00203 |
| RAB20        | 0.587  | -0.233 | -0.087 | 0.155  | -0.124 | 0.00203 |
| AC104651.1   | -0.565 | -0.377 | -0.321 | -0.717 | -1.096 | 0.00203 |
| MICU3        | -0.353 | -0.078 | -0.157 | -0.498 | -0.426 | 0.00204 |
| MFSD7        | -0.423 | -0.017 | -0.038 | -0.662 | -0.506 | 0.00204 |
| TBC1D3H      | -0.726 | 0.023  | 0.098  | -0.826 | -0.595 | 0.00204 |
| RP11-425I13  | -0.376 | -0.445 | -0.393 | -0.796 | -1.152 | 0.00204 |
| RP1-228H13   | 0.094  | 0.378  | -0.219 | 0.183  | 0.666  | 0.00206 |
| RNGTT        | 0.211  | 0.3    | 0.175  | 0.421  | 0.236  | 0.00206 |
| SLIT2        | 0.154  | 0.154  | 0.032  | 0.323  | -0.128 | 0.00206 |
| XYLB         | 0.018  | -0.228 | -0.202 | -0.391 | -0.465 | 0.00207 |
| RP11-566K1   | -0.316 | -0.682 | -0.313 | -1.005 | -0.974 | 0.00207 |
| CNIH1        | -0.071 | -0.104 | -0.104 | -0.37  | -0.35  | 0.00208 |
| RP11-65F13   | -0.174 | -0.162 | 0.024  | -0.138 | -0.388 | 0.00208 |
| C5orf28      | -0.304 | -0.242 | -0.093 | -0.283 | -0.52  | 0.00209 |
| SNORD68      | -0.126 | 0.136  | 0.131  | -0.713 | -0.734 | 0.00209 |
| CTD-2309M1   | 0.397  | -0.14  | -0.213 | 0.13   | -0.093 | 0.0021  |
| PDCD10       | -0.262 | -0.083 | -0.025 | -0.461 | -0.394 | 0.0021  |
| RP11-95I19.1 | -0.539 | -0.286 | -0.06  | -0.191 | -0.504 | 0.0021  |
| IL20RB       | -0.145 | 0.121  | -0.057 | -0.679 | -0.773 | 0.0021  |
| RP11-204J11  | -0.008 | 0.044  | 0.146  | -0.272 | -0.909 | 0.0021  |
| EIF4G1       | 0.385  | 0.054  | -0.017 | 0.368  | 0.183  | 0.00211 |
| RP11-1136G   | 0.394  | -0.021 | 0.125  | 0.346  | 0.061  | 0.00211 |

|             |        |        |        |        |        |         |
|-------------|--------|--------|--------|--------|--------|---------|
| RP11-35B20  | -0.37  | -0.327 | -0.127 | -0.442 | -0.63  | 0.00212 |
| RP11-274B2  | -0.104 | 0.001  | 0.055  | -0.827 | -0.422 | 0.00213 |
| RP11-404O1  | 0.36   | 0.172  | -0.064 | 0.051  | 0.243  | 0.00214 |
| ARL4D       | 0.172  | -0.226 | -0.361 | 0.027  | -0.287 | 0.00214 |
| RP11-244J10 | -0.489 | -0.397 | -0.276 | -0.775 | -0.446 | 0.00214 |
| SNRPEP4     | -0.14  | -0.189 | -0.049 | -0.35  | -0.477 | 0.00214 |
| RP11-307L3  | -0.399 | -0.231 | -0.132 | -0.662 | -0.434 | 0.00216 |
| RP11-535K1  | 0.536  | -0.052 | -0.162 | 0.091  | 0.055  | 0.00217 |
| RP1-257A7.4 | -0.704 | -0.524 | 0.112  | -0.51  | -0.787 | 0.00217 |
| POTEE       | 0.416  | -0.145 | -0.189 | 0.257  | 0.043  | 0.00218 |
| AC004980.7  | -0.611 | -0.088 | 0.032  | -0.454 | 0.274  | 0.00219 |
| NCLP1       | 0.4    | -0.102 | -0.276 | 0.116  | -0.315 | 0.00219 |
| MRPL32      | -0.286 | -0.268 | -0.23  | -0.382 | -0.501 | 0.00219 |
| FAM195A     | -0.389 | -0.195 | -0.148 | -0.169 | 0.179  | 0.0022  |
| TXN         | -0.252 | -0.074 | 0.004  | -0.337 | -0.483 | 0.0022  |
| AP3B1       | 0.422  | 0.217  | 0.09   | 0.51   | 0.414  | 0.00221 |
| CRADD       | -0.067 | -0.049 | 0.068  | 0.393  | -0.018 | 0.00221 |
| AC010095.6  | -0.015 | 0.387  | 0.088  | -0.093 | -0.469 | 0.00221 |
| THG1L       | 0.23   | 0.182  | 0.107  | 0.348  | 0.404  | 0.00222 |
| REL         | 0.127  | 0.044  | -0.144 | -0.378 | 0.007  | 0.00222 |
| POLR2I      | -0.238 | -0.212 | -0.013 | -0.14  | -0.375 | 0.00223 |
| THAP2       | -0.122 | 0.125  | 0.306  | 0.154  | 0.421  | 0.00224 |
| TTC30B      | -0.204 | 0.204  | 0.244  | 0.641  | 0.351  | 0.00224 |
| AC073958.2  | -0.212 | -0.4   | -0.491 | -0.829 | -0.56  | 0.00224 |
| ZNF625      | -0.198 | 0.052  | -0.265 | -0.795 | -0.744 | 0.00224 |
| RP11-572H4  | 0.09   | -0.034 | 0.037  | 0.342  | 0.491  | 0.00225 |
| ZNF606      | -0.241 | 0.384  | 0.311  | 0.107  | 0.249  | 0.00225 |
| MRPL46      | -0.267 | -0.222 | -0.084 | -0.086 | -0.425 | 0.00226 |
| ZFHX4-AS1   | -0.282 | -0.082 | -0.196 | -0.368 | -0.521 | 0.00226 |
| PEX12       | -0.033 | 0.259  | 0.125  | 0.351  | -0.043 | 0.00227 |
| USP11       | 0.448  | 0.241  | 0.065  | 0.281  | 0.064  | 0.00228 |
| AMDHD2      | -0.243 | -0.107 | -0.073 | -0.574 | -0.344 | 0.00228 |
| ZDHHC21     | -0.113 | -0.109 | -0.086 | -0.398 | -0.162 | 0.00229 |
| TMLHE       | 0.112  | 0.045  | 0.002  | 0.29   | 0.371  | 0.00231 |
| ABAT        | 0.323  | 0.058  | 0.231  | 0.616  | 0.53   | 0.00232 |
| RAB43P1     | -0.004 | -0.112 | -0.093 | 0.16   | 0.472  | 0.00232 |
| FAIM        | 0.333  | 0.071  | 0.016  | 0.415  | 0.28   | 0.00232 |
| RP11-554J4  | -0.291 | 0.125  | 0.037  | -0.55  | -0.894 | 0.00232 |

|             |        |        |        |        |        |         |
|-------------|--------|--------|--------|--------|--------|---------|
| RP11-343C2  | 0.018  | 0.064  | 0.054  | 0.319  | 0.435  | 0.00233 |
| RP11-629O1  | -0.72  | 0.128  | 0.08   | -0.776 | -0.413 | 0.00233 |
| RP11-395I14 | -0.365 | -0.027 | 0.074  | -0.815 | -0.716 | 0.00233 |
| RP11-793H1  | -0.635 | -0.02  | 0.128  | 0.036  | -0.823 | 0.00233 |
| TNFAIP8     | 0.299  | 0.527  | 0.26   | 0.154  | 0.393  | 0.00234 |
| RP6-145B8.3 | 0.313  | -0.091 | -0.055 | 0.372  | 0.181  | 0.00234 |
| EFCAB7      | -0.445 | -0.246 | -0.139 | -0.054 | -0.539 | 0.00234 |
| SNORD88A    | -0.394 | -0.335 | -0.66  | -1.089 | -0.883 | 0.00234 |
| AP000361.2  | -0.336 | -0.413 | -0.172 | -0.51  | -0.602 | 0.00235 |
| TRPM4       | -0.203 | -0.015 | -0.012 | -0.329 | -0.159 | 0.00236 |
| NEMP2       | 0.021  | 0.218  | -0.081 | -0.192 | -0.402 | 0.00236 |
| RP11-525A1  | -0.309 | -0.142 | 0.219  | 0.07   | 0.564  | 0.00237 |
| TTC27       | 0.307  | 0.197  | 0.094  | 0.404  | 0.194  | 0.00238 |
| RP11-169K1  | -0.514 | -0.572 | -0.136 | -0.391 | -0.601 | 0.00238 |
| ZNF764      | -0.142 | 0.22   | -0.137 | -0.358 | -0.295 | 0.00239 |
| MT-TE       | -0.423 | -0.26  | 0.199  | -0.876 | -0.612 | 0.00239 |
| RP11-280G1  | 0.411  | -0.042 | 0.12   | 0.402  | 0.132  | 0.0024  |
| RRP1        | -0.049 | -0.051 | -0.193 | -0.187 | -0.408 | 0.0024  |
| RP11-617F2  | 0.418  | -0.036 | 0.291  | 0.195  | 0.797  | 0.00241 |
| TMEM143     | -0.324 | 0.011  | 0.172  | 0.112  | -0.382 | 0.00241 |
| RN7SL81P    | -0.452 | 0.059  | 0.248  | -0.834 | -0.483 | 0.00241 |
| CARS        | 0.192  | 0.124  | 0.176  | 0.376  | 0.231  | 0.00242 |
| LINC00493   | -0.35  | -0.281 | -0.131 | -0.436 | -0.6   | 0.00242 |
| RF00411     | -0.115 | 0.226  | 0.487  | -0.576 | -0.39  | 0.00244 |
| AC009120.6  | -0.148 | -0.074 | 0.291  | -0.603 | -0.021 | 0.00245 |
| RP11-419C5  | -0.279 | -0.078 | -0.211 | -0.815 | -0.769 | 0.00245 |
| ZNF195      | 0.002  | 0.357  | 0.297  | -0.015 | 0.23   | 0.00246 |
| HARS        | 0.329  | 0.125  | 0.016  | 0.273  | 0.204  | 0.00246 |
| RP11-449L1  | 0.416  | -0.055 | -0.069 | 0.268  | 0.086  | 0.00249 |
| SLC22A5     | -0.197 | -0.066 | 0.317  | 0.221  | 0.463  | 0.00251 |
| NUDT6       | -0.528 | -0.434 | 0.29   | 0.03   | -0.018 | 0.00254 |
| RP5-894A10  | -0.065 | 0.145  | 0.074  | -0.601 | 0.116  | 0.00255 |
| SLC4A1AP    | 0.182  | 0.145  | 0.072  | 0.331  | -0.056 | 0.00255 |
| NDUFAB1     | -0.156 | -0.099 | -0.044 | -0.282 | -0.422 | 0.00255 |
| RP4-814E15  | -0.288 | -0.649 | 0.012  | -0.247 | -0.754 | 0.00255 |
| ATP6V1A     | 0.383  | 0.291  | 0.161  | 0.531  | 0.2    | 0.00256 |
| RP11-398F1  | -0.82  | -0.069 | 0.213  | -0.253 | 0.086  | 0.00256 |
| SMUG1       | -0.349 | -0.13  | -0.102 | -0.11  | -0.314 | 0.00256 |

|             |        |        |        |        |        |         |
|-------------|--------|--------|--------|--------|--------|---------|
| MKS1        | -0.265 | -0.045 | 0.022  | 0.016  | -0.345 | 0.00256 |
| AC017116.1  | -0.037 | 0.602  | 0.419  | -0.039 | 0.51   | 0.00257 |
| ARMC7       | 0.439  | 0.107  | 0.063  | 0.247  | -0.02  | 0.00257 |
| CHKA        | 0.128  | -0.086 | -0.159 | -0.123 | 0.357  | 0.00258 |
| PPP1R3C     | 0.455  | 0.165  | 0.153  | 0.075  | 0.231  | 0.00258 |
| PBX2P1      | -0.368 | -0.233 | -0.044 | -0.257 | -0.295 | 0.00258 |
| RPL17       | -0.263 | -0.012 | -0.002 | -0.404 | -0.375 | 0.00258 |
| ATRN        | 0.184  | 0.069  | -0.006 | 0.245  | 0.332  | 0.00259 |
| NME3        | -0.328 | -0.161 | -0.154 | -0.421 | 0.034  | 0.00259 |
| TMEM86A     | 0.305  | 0.471  | -0.165 | -0.016 | -0.003 | 0.00259 |
| FUT10       | -0.382 | -0.178 | -0.167 | -0.22  | -0.363 | 0.00259 |
| RP11-511H9  | -0.236 | -0.391 | -0.179 | -0.673 | -0.607 | 0.00259 |
| MID1IP1     | -0.013 | -0.031 | -0.064 | -0.067 | -0.392 | 0.00262 |
| RP11-1149O  | -0.182 | 0.298  | 0.501  | 0.179  | 0.463  | 0.00263 |
| PSCA        | -0.305 | 0.239  | 0.57   | 0.438  | 0.357  | 0.00263 |
| COQ3        | 0.007  | -0.14  | 0.081  | -0.012 | -0.484 | 0.00263 |
| ZNF669      | -0.123 | -0.026 | 0.082  | 0.142  | 0.448  | 0.00264 |
| WDR7        | 0.287  | 0.259  | 0.281  | 0.504  | 0.204  | 0.00264 |
| HSPA1B      | -0.612 | -0.073 | -0.326 | -0.127 | -0.251 | 0.00264 |
| TYW5        | -0.424 | -0.042 | 0.035  | -0.439 | -0.259 | 0.00264 |
| TRAPPC13    | -0.175 | 0.042  | 0.044  | -0.111 | -0.456 | 0.00264 |
| DLST        | 0.353  | 0.152  | 0.099  | 0.256  | 0.234  | 0.00265 |
| CMAHP       | -0.87  | -0.461 | -0.48  | -0.75  | -0.322 | 0.00265 |
| GGACT       | 0.16   | 0.003  | 0.233  | 0.481  | 0.502  | 0.00266 |
| GPATCH3     | 0.368  | 0.161  | 0.095  | 0.163  | -0.018 | 0.00266 |
| FOXL1       | 0.226  | 0.07   | 0.266  | 0.374  | -0.108 | 0.00266 |
| RP11-838N2  | -0.286 | -0.093 | -0.512 | -0.552 | 0.509  | 0.00267 |
| BOLA2B      | -0.263 | -0.199 | -0.232 | 0.218  | 0.42   | 0.00267 |
| CLIP3       | 0.129  | 0.315  | 0.329  | 0.551  | 0.362  | 0.00269 |
| RP11-176H8  | -0.231 | -0.308 | -0.252 | -0.444 | -0.325 | 0.00269 |
| MIR4321     | -0.132 | -0.335 | -0.277 | -0.654 | -0.662 | 0.00269 |
| LRRC37B     | 0.003  | 0.062  | 0.101  | -0.482 | -0.275 | 0.0027  |
| AC009945.3  | -0.258 | -0.371 | -0.187 | 0.06   | -0.207 | 0.00271 |
| RP11-33B1.3 | -0.783 | -0.144 | -0.381 | -0.941 | -0.914 | 0.00271 |
| LAMTOR5     | -0.115 | -0.119 | -0.057 | -0.276 | -0.35  | 0.00272 |
| CAPS        | -0.256 | 0.168  | 0.406  | -0.236 | 0.222  | 0.00273 |
| IDE         | 0.279  | 0.269  | 0.146  | 0.391  | 0.092  | 0.00274 |
| CIDECF      | 0.09   | 0.1    | 0.011  | 0.001  | -0.353 | 0.00274 |

|              |        |        |        |        |        |         |
|--------------|--------|--------|--------|--------|--------|---------|
| CHCHD5       | -0.111 | -0.182 | -0.094 | -0.293 | -0.443 | 0.00274 |
| RP11-458J1.  | -0.208 | -0.124 | -0.29  | -0.172 | -0.892 | 0.00274 |
| LRCH4        | -0.369 | 0.012  | -0.116 | -0.447 | -0.215 | 0.00276 |
| SLC2A1       | -0.096 | -0.135 | -0.328 | -0.091 | -0.35  | 0.00276 |
| MALSU1       | -0.38  | -0.237 | -0.142 | -0.321 | -0.36  | 0.00276 |
| C5orf63      | -0.044 | -0.081 | 0.674  | 0.047  | 0.623  | 0.00278 |
| SLC10A3      | 0.159  | 0.073  | 0.099  | 0.338  | 0.238  | 0.00278 |
| RP11-18H7.   | -0.522 | -0.328 | 0.179  | -0.649 | -0.037 | 0.00278 |
| PIGL         | -0.365 | -0.032 | -0.086 | -0.546 | -0.352 | 0.00278 |
| CLEC2D       | -0.357 | 0.278  | 0.361  | -0.267 | -0.015 | 0.00279 |
| PARD6G       | 0.072  | 0.649  | 0.534  | 0.527  | 0.822  | 0.0028  |
| CA13         | 0.548  | 0.614  | 0.469  | 0.288  | 0.382  | 0.0028  |
| ACOT1        | -0.098 | -0.099 | -0.047 | 0.249  | 0.64   | 0.00282 |
| HSD17B7P2    | -0.51  | -0.246 | -0.211 | -0.931 | -0.565 | 0.00284 |
| RP11-478C6   | -0.381 | -0.298 | -0.14  | -0.567 | -0.492 | 0.00285 |
| RP4-575N6.2  | -0.436 | -0.368 | -0.275 | -0.96  | -0.718 | 0.00285 |
| ZNF576       | -0.186 | -0.135 | -0.152 | -0.071 | -0.418 | 0.00288 |
| RP11-304L19  | -0.417 | -0.092 | -0.199 | -0.741 | -0.812 | 0.00289 |
| TWINK        | -0.192 | -0.054 | -0.196 | -0.214 | -0.372 | 0.0029  |
| TMEM258      | -0.228 | -0.225 | -0.078 | -0.429 | -0.421 | 0.0029  |
| RP11-326I11  | -0.454 | 0.067  | 0.094  | 0.416  | -0.21  | 0.00291 |
| RPL37A       | -0.356 | -0.162 | -0.051 | -0.478 | -0.449 | 0.00291 |
| PEMT         | 0.077  | -0.107 | -0.18  | -0.129 | -0.362 | 0.00293 |
| GRAPL        | 0.481  | -0.205 | -0.292 | -0.455 | 0.329  | 0.00296 |
| ZNF280D      | -0.224 | -0.088 | 0.065  | -0.378 | -0.288 | 0.00296 |
| PLCD4        | 0.136  | -0.056 | 0.122  | 0.08   | 0.647  | 0.00297 |
| HECTD1       | 0.177  | 0.092  | 0.048  | 0.235  | 0.331  | 0.00298 |
| TIPRL        | -0.161 | -0.104 | -0.05  | -0.113 | -0.39  | 0.00298 |
| TMEM170B     | -0.038 | 0.076  | 0.419  | 0.158  | -0.07  | 0.00299 |
| CTB-113I20.1 | -0.519 | 0.077  | -0.112 | -0.453 | -0.984 | 0.00299 |
| C8orf76      | -0.188 | -0.043 | -0.145 | -0.401 | -0.544 | 0.00301 |
| RP4-647C14   | 0.071  | 0.019  | -0.101 | -0.847 | -0.595 | 0.00301 |
| RP1-206D15   | -0.188 | -0.295 | -0.043 | -0.864 | -0.786 | 0.00301 |
| RP11-1136G   | -0.227 | -0.237 | -0.118 | -0.306 | -0.525 | 0.00302 |
| SNORD36C     | -0.208 | -0.156 | 0.076  | -0.796 | -0.807 | 0.00303 |
| RP11-638I2.1 | -0.356 | 0.24   | 0.233  | -0.741 | -0.48  | 0.00305 |
| RP11-40F6.2  | 0.381  | 0.057  | 0.203  | 0.579  | 0.604  | 0.00306 |
| RP11-409C1   | -0.262 | -0.187 | -0.092 | -0.324 | -0.483 | 0.00306 |

|            |        |        |        |        |        |         |
|------------|--------|--------|--------|--------|--------|---------|
| SNAPC5     | -0.296 | -0.164 | 0.113  | -0.062 | -0.41  | 0.00307 |
| NPIP5      | -0.173 | 0.092  | 0.052  | -0.697 | -0.545 | 0.00308 |
| AC079135.1 | -0.714 | -0.297 | -0.331 | -0.311 | 0.156  | 0.00309 |
| TMOD4      | -0.233 | -0.026 | 0.404  | -0.577 | -0.225 | 0.00309 |
| KCNMB3     | -0.918 | -0.356 | -0.204 | -0.754 | -0.569 | 0.0031  |
| YAF2       | -0.203 | -0.103 | -0.194 | -0.472 | 0.086  | 0.00316 |
| GNB2       | 0.224  | 0.072  | 0.042  | 0.365  | 0.29   | 0.00317 |
| ZNF701     | -0.421 | -0.096 | -0.154 | -0.435 | -0.124 | 0.00318 |
| ASAH2B     | 0.469  | 0.11   | 0.491  | 0.465  | 0.443  | 0.00319 |
| RP3-390M24 | -0.291 | -0.215 | -0.372 | -0.715 | -0.705 | 0.00325 |
| AC074289.1 | 0.365  | 0.244  | 0.742  | 0.329  | 1.097  | 0.00328 |
| COL4A2     | 0.375  | 0.116  | -0.139 | 0.268  | 0.204  | 0.00328 |
| RP11-290D2 | -0.529 | -0.868 | -0.637 | -0.902 | -1.083 | 0.00329 |
| TANGO6     | 0.032  | -0.073 | 0.096  | 0.381  | 0.083  | 0.00331 |
| RPS6KA1    | 0.325  | 0.181  | 0.084  | 0.339  | -0.005 | 0.00332 |
| COMMD10    | -0.214 | -0.176 | -0.182 | -0.522 | -0.232 | 0.00332 |
| RP11-356O2 | 0.378  | 0.085  | -0.017 | 0.353  | 0.167  | 0.00334 |
| RP11-478K7 | -0.406 | -0.442 | -0.299 | -0.535 | -0.559 | 0.00334 |
| RAET1L     | 0.256  | -0.138 | -0.322 | -0.184 | -0.881 | 0.00334 |
| AC073150.6 | -0.039 | -0.123 | -0.404 | 0.372  | 0.347  | 0.00336 |
| RP11-497H1 | -0.873 | -0.405 | -0.141 | -0.871 | -0.843 | 0.00336 |
| FABP5      | 0.024  | 0.014  | -0.179 | -0.257 | 0.382  | 0.00338 |
| RP11-123D1 | 0.447  | 0.052  | 0.029  | 0.343  | 0.365  | 0.00338 |
| ZNF595     | -0.193 | -0.106 | -0.376 | -0.54  | -0.474 | 0.00338 |
| SUB1P1     | -0.088 | -0.109 | -0.087 | -0.412 | -0.478 | 0.00339 |
| KLHL26     | 0.411  | 0.119  | -0.035 | 0.086  | -0.163 | 0.00341 |
| SWAP70     | 0.345  | 0.075  | 0.018  | 0.31   | 0.21   | 0.00342 |
| FOXN3      | 0.354  | 0.116  | 0.114  | 0.323  | 0.244  | 0.00343 |
| COPG1      | 0.458  | 0.105  | -0.034 | 0.258  | 0.157  | 0.00345 |
| ALKBH3     | 0.123  | 0.06   | 0.099  | 0.324  | 0.059  | 0.00346 |
| CENPH      | 0.009  | 0.127  | 0.189  | 0.473  | 0.081  | 0.00348 |
| ARHGEF18   | -0.04  | 0.148  | 0.07   | 0.059  | 0.454  | 0.00349 |
| MAGEF1     | 0.021  | 0.073  | 0.04   | 0.433  | 0.056  | 0.0035  |
| RP11-474D1 | -0.622 | -0.29  | 0.411  | -0.482 | 0.131  | 0.00353 |
| RP4-773N10 | -0.215 | -0.077 | 0.107  | -0.356 | 0.098  | 0.00353 |
| IRAK1BP1   | -0.688 | -0.271 | 0.06   | -0.142 | -0.025 | 0.00353 |
| NUDT18     | -0.488 | 0.013  | 0.035  | 0.114  | -0.091 | 0.00353 |
| PIGM       | -0.104 | 0.004  | -0.008 | 0.021  | -0.33  | 0.00353 |

|             |        |        |        |        |        |         |
|-------------|--------|--------|--------|--------|--------|---------|
| CTD-2090113 | 0.416  | -0.167 | -0.018 | 0.348  | 0.04   | 0.00355 |
| CTC-359D24  | -0.268 | 0.055  | -0.445 | -0.726 | -0.67  | 0.00355 |
| SNORA71A    | -0.738 | -0.134 | -0.138 | -0.669 | -0.959 | 0.00356 |
| MAPK13      | 0.233  | -0.052 | -0.201 | -0.41  | 0.2    | 0.00357 |
| INO80B      | -0.109 | 0.419  | 0.532  | 0.121  | -0.117 | 0.00357 |
| SNORD37     | -0.487 | 0.093  | 0.169  | -0.626 | -0.741 | 0.00357 |
| PARN        | 0.225  | -0.028 | 0.014  | 0.372  | 0.069  | 0.00358 |
| C6orf163    | -0.215 | 0.269  | 0.429  | -0.487 | -0.398 | 0.0036  |
| RP11-392A2  | -0.422 | -0.172 | 0.228  | 0.32   | -0.291 | 0.00361 |
| MIR3153     | -1.018 | -0.573 | -0.371 | -0.989 | -0.85  | 0.00361 |
| ZXDA        | 0.166  | 0.048  | -0.018 | -0.075 | 0.446  | 0.00362 |
| RN7SL834P   | -0.231 | 0.268  | 0.686  | -0.363 | -0.136 | 0.00363 |
| RP11-758H9  | -0.687 | -0.268 | -0.321 | -0.496 | -1.043 | 0.00365 |
| GNG11       | -0.289 | -0.308 | -0.263 | -0.462 | -0.086 | 0.00366 |
| TSTD1       | -0.461 | -0.345 | -0.209 | -0.672 | -0.369 | 0.00367 |
| RP13-34C21  | 0.076  | -0.324 | -0.552 | -0.023 | 0.329  | 0.00368 |
| PTCD1       | -0.27  | -0.14  | -0.298 | -0.43  | -0.573 | 0.00369 |
| PPP1R3F     | -0.275 | 0.186  | 0.406  | -0.446 | -0.061 | 0.00372 |
| RPAIN       | -0.276 | -0.074 | -0.008 | -0.4   | -0.262 | 0.00374 |
| THAP6       | -0.138 | 0.049  | -0.012 | -0.189 | -0.503 | 0.00375 |
| STMN3       | 0.142  | 0.064  | 0.238  | 0.38   | -0.338 | 0.00376 |
| RP11-861E2  | -0.528 | -0.214 | 0.258  | -0.564 | -0.448 | 0.0038  |
| FBXL15      | -0.539 | -0.054 | -0.169 | -0.367 | -0.115 | 0.00382 |
| SNORD63B    | -0.311 | -0.261 | -0.297 | -1.042 | -0.742 | 0.00382 |
| FANCL       | -0.222 | -0.007 | -0.128 | -0.277 | -0.338 | 0.00383 |
| MDP1        | -0.238 | -0.268 | -0.198 | -0.475 | -0.971 | 0.00385 |
| MST1L       | -0.758 | -0.107 | 0.13   | -0.53  | -0.522 | 0.00386 |
| SGF29       | -0.077 | -0.139 | -0.166 | -0.155 | -0.516 | 0.00387 |
| RP11-748L11 | 0.22   | -0.071 | 0.292  | 0.269  | 0.942  | 0.00389 |
| CTC-471J1.1 | -0.09  | -0.084 | -0.019 | -0.602 | -0.832 | 0.00389 |
| UBA1        | 0.295  | 0.11   | 0.039  | 0.423  | 0.461  | 0.0039  |
| HIST1H2BC   | 0.45   | 0.679  | 0.811  | 0.99   | 0.377  | 0.0039  |
| CMB9-22P13  | -0.284 | 0.026  | 0.618  | 0.355  | 0.625  | 0.00392 |
| EPB41L4A-A  | 0.026  | 0.126  | 0.071  | -0.397 | 0.005  | 0.00392 |
| RP11-365H2  | -0.05  | -0.249 | -0.088 | -0.209 | -0.433 | 0.00393 |
| RP11-327J11 | -0.935 | -0.504 | -0.206 | -0.461 | -0.501 | 0.00393 |
| EIF4E3      | 0.442  | 0.649  | 0.606  | 0.645  | 0.475  | 0.00394 |
| GALNT14     | -0.098 | -0.11  | -0.34  | -0.035 | -0.83  | 0.00394 |

|             |        |        |        |        |        |         |
|-------------|--------|--------|--------|--------|--------|---------|
| RP11-356C4  | -0.571 | -0.403 | -0.424 | -1.047 | -0.905 | 0.00394 |
| AARS        | 0.244  | 0.091  | 0.061  | 0.481  | 0.228  | 0.00395 |
| SNORA13     | 0.002  | 0.117  | -0.104 | -0.57  | -0.884 | 0.00395 |
| SLC25A42    | -0.496 | -0.115 | 0.005  | -0.019 | 0.056  | 0.00397 |
| FAM204A     | -0.181 | -0.139 | -0.205 | -0.335 | -0.324 | 0.00397 |
| H2AFZP      | -0.082 | -0.204 | 0.014  | -0.083 | -0.553 | 0.00397 |
| SAC3D1      | 0.254  | 0.282  | 0.194  | 0.443  | 0.204  | 0.00398 |
| MIR6753     | -0.099 | 0.157  | 0.027  | -0.683 | -0.76  | 0.00398 |
| AC004987.7  | -0.306 | 0.034  | 0.453  | 0.008  | 0.384  | 0.004   |
| RPL37P2     | -0.388 | -0.364 | -0.129 | -0.661 | -0.643 | 0.00401 |
| AC010132.1  | 0.193  | -0.094 | -0.303 | 0.021  | -0.729 | 0.00401 |
| RP4-706A16  | -0.247 | -0.111 | 0.007  | -0.504 | -0.357 | 0.00404 |
| AC093416.3  | 0.057  | -0.453 | -0.276 | -0.368 | -0.852 | 0.00407 |
| B9D1        | -0.254 | -0.071 | -0.011 | -0.06  | -0.431 | 0.00408 |
| HOXD8       | -0.088 | -0.044 | 0.059  | 0.04   | -0.35  | 0.0041  |
| SNORA3A     | -0.602 | 0.124  | 0.006  | -0.838 | -0.356 | 0.0041  |
| CTD-3222D1  | -0.526 | -0.131 | 0.054  | -0.702 | -0.527 | 0.00411 |
| RP11-576C2  | -0.915 | -0.16  | -0.106 | -0.811 | -0.653 | 0.00411 |
| RP11-87H9.4 | -0.55  | 0.111  | 0.288  | -0.363 | -0.269 | 0.00414 |
| RPA1        | 0.364  | 0.137  | -0.025 | 0.392  | 0.13   | 0.00416 |
| ZNRF2       | 0.427  | 0.219  | -0.069 | -0.187 | 0.349  | 0.00418 |
| NDUFS4      | -0.175 | -0.127 | -0.1   | -0.262 | -0.428 | 0.00418 |
| RP11-392E2  | 0.205  | -0.176 | 0.16   | -0.78  | -0.53  | 0.00418 |
| RP11-10B2.3 | -0.579 | -0.427 | 0.182  | -0.756 | -0.705 | 0.00419 |
| ZNF614      | -0.224 | -0.156 | -0.282 | -0.358 | -0.445 | 0.0042  |
| C17orf62    | -0.328 | -0.156 | -0.029 | -0.139 | -0.146 | 0.00421 |
| CSRP2       | 0.066  | 0.421  | 0.137  | 0.558  | -0.301 | 0.00422 |
| AF001548.5  | -0.206 | -0.261 | -0.04  | 0.48   | 0.679  | 0.00424 |
| NDUFAF6     | -0.02  | -0.038 | -0.181 | -0.36  | -0.409 | 0.00425 |
| CTD-2066L2  | 0.069  | -0.079 | 0.347  | 0.143  | 0.97   | 0.00428 |
| XXbac-BPG2  | -0.357 | 0.541  | 0.472  | -0.008 | 0.025  | 0.0043  |
| AC004014.4  | 0.188  | -0.362 | -0.289 | -0.088 | -0.053 | 0.00432 |
| MEST        | 0.049  | 0.004  | -0.169 | -0.182 | -0.543 | 0.00433 |
| SNORA31     | -0.464 | 0.08   | -0.035 | -0.699 | -0.848 | 0.00433 |
| CACNG7      | 0.151  | 0.02   | 0.129  | 0.253  | -0.366 | 0.00434 |
| EEF1A2      | 0.424  | 0.278  | 0.303  | 0.751  | 0.594  | 0.00435 |
| CHIC2       | 0.217  | 0.238  | 0.276  | 0.16   | 0.377  | 0.00435 |
| RP11-403P1  | -0.375 | -0.345 | -0.174 | -0.482 | -0.396 | 0.00435 |



|              |        |        |        |        |        |         |
|--------------|--------|--------|--------|--------|--------|---------|
| RP11-73M18   | -0.33  | -0.041 | 0.303  | -0.509 | -0.584 | 0.00437 |
| RP11-178H8   | -0.313 | -0.337 | -0.032 | -0.378 | -1.039 | 0.00438 |
| RP11-818F2   | -0.545 | -0.293 | 0.206  | -0.442 | -0.224 | 0.0044  |
| RP11-626A1   | -0.694 | -0.652 | -0.458 | -0.368 | -1.043 | 0.0044  |
| AC006483.5   | 0.353  | -0.133 | 0.117  | 0.291  | 0.178  | 0.00442 |
| PEF1         | 0.235  | 0.121  | 0.075  | 0.369  | 0.074  | 0.00442 |
| PRKACA       | 0.357  | 0.036  | -0.047 | 0.26   | 0.206  | 0.00443 |
| PKD1P1       | -0.182 | 0.011  | 0.023  | -0.585 | -0.151 | 0.00443 |
| RP11-271B5   | -0.225 | -0.207 | -0.063 | -0.505 | -0.48  | 0.00443 |
| AC005546.2   | -0.545 | -0.409 | -0.101 | -0.998 | -0.815 | 0.00444 |
| RP11-646E1   | 0.457  | -0.083 | -0.091 | 0.139  | 0.17   | 0.00446 |
| IGIP         | -0.381 | 0.022  | 0.145  | -0.362 | -0.19  | 0.00447 |
| SCARNA16     | -0.594 | 0.119  | 0.307  | -0.554 | -0.499 | 0.00447 |
| ALDOA        | 0.282  | 0.034  | 0.02   | 0.422  | 0.322  | 0.00448 |
| PCOLCE       | -0.4   | -0.054 | 0.418  | 0.064  | -0.258 | 0.00448 |
| RP11-122G1   | 0.072  | -0.317 | -0.045 | 0.152  | -0.88  | 0.00449 |
| RARRES3      | 0.197  | -0.125 | 0.083  | -0.074 | 0.777  | 0.00453 |
| MT-TY        | -0.104 | -0.335 | 0.377  | -0.496 | -0.723 | 0.00453 |
| PPARGC1B     | -0.375 | -0.286 | -0.007 | -0.277 | 0.009  | 0.00455 |
| TATDN3       | -0.278 | -0.095 | -0.012 | -0.159 | -0.402 | 0.00455 |
| DDT          | -0.278 | -0.067 | 0.001  | -0.186 | -0.473 | 0.00457 |
| HLA-J        | 0.317  | 0.154  | 0.304  | 0.565  | 0.826  | 0.00463 |
| NUDT13       | -0.54  | -0.203 | 0.179  | -0.107 | -0.218 | 0.00464 |
| ASPHD1       | -0.427 | 0.006  | 0.067  | -0.253 | -0.403 | 0.00465 |
| PCGF7P       | 0.361  | -0.053 | -0.11  | -0.055 | -0.313 | 0.00467 |
| IL11RA       | -0.227 | -0.135 | -0.071 | -0.253 | -0.453 | 0.00467 |
| BNIP3P       | 0.15   | 0.097  | 0.092  | 0.36   | 0.255  | 0.00468 |
| RP5-906C1.1  | 0.11   | -0.21  | -0.028 | -0.427 | -0.936 | 0.00469 |
| RP3-339A18   | -0.728 | -0.197 | -0.144 | -0.923 | -0.795 | 0.00471 |
| ATP1A1OS     | -0.907 | -0.11  | -0.271 | 0.168  | -0.101 | 0.00473 |
| TDRD9        | -0.249 | -0.215 | 0.228  | -0.191 | 0.365  | 0.00474 |
| RP11-110I1.1 | -0.554 | 0.006  | 0.081  | 0.362  | -0.379 | 0.00475 |
| UBQLN2       | 0.269  | 0.088  | -0.087 | 0.267  | 0.357  | 0.00476 |
| HSPBP1       | 0.274  | 0.065  | -0.035 | 0.332  | 0.07   | 0.00476 |
| RP11-332M2   | 0.348  | 0.013  | -0.001 | 0.367  | -0.021 | 0.00477 |
| URB2         | -0.154 | -0.022 | -0.228 | -0.239 | -0.349 | 0.00477 |
| CTD-2382E5   | -0.432 | -0.185 | -0.162 | -0.973 | -0.608 | 0.00477 |
| PHF11        | -0.029 | 0.21   | 0.394  | 0.192  | 0.326  | 0.00478 |

|             |        |        |        |        |        |         |
|-------------|--------|--------|--------|--------|--------|---------|
| ADAT3       | -0.173 | 0.331  | 0.032  | -0.303 | 0.398  | 0.00479 |
| EIF3E       | -0.174 | 0.065  | 0.15   | -0.086 | 0.327  | 0.00479 |
| GAREM2      | 0.406  | 0.137  | -0.057 | 0.067  | 0.401  | 0.0048  |
| TKT         | 0.362  | 0.172  | 0.03   | 0.395  | 0.323  | 0.00481 |
| ING2        | 0.55   | 0.307  | 0.19   | 0.436  | 0.161  | 0.00483 |
| TPRN        | -0.199 | -0.02  | -0.26  | -0.306 | -0.378 | 0.00484 |
| RP11-401M1  | 0.232  | 0.154  | 0.13   | 0.407  | 0.403  | 0.00493 |
| HNRNPU      | 0.335  | 0.164  | 0.077  | 0.384  | 0.34   | 0.00494 |
| TRADD       | -0.003 | 0.101  | 0.178  | 0.111  | 0.333  | 0.00495 |
| RP11-452F1  | -0.246 | -0.001 | -0.239 | -0.51  | -0.767 | 0.00496 |
| ZG16B       | -0.129 | 0.399  | 0.402  | 0.359  | 0.934  | 0.00497 |
| FOXD2-AS1   | -0.351 | -0.289 | -0.272 | -0.684 | -0.737 | 0.00499 |
| RP11-1113N  | 0.363  | 0.038  | -0.046 | 0.372  | 0.277  | 0.005   |
| CARNMT1     | 0.192  | 0.119  | 0.236  | 0.361  | 0.155  | 0.005   |
| RP11-135F9  | 0.743  | 0.428  | 0.189  | 0.333  | 0.076  | 0.00502 |
| AKR1E2      | -0.541 | -0.264 | -0.26  | -0.493 | -0.623 | 0.00503 |
| ZNF91       | 0.023  | 0.197  | 0.052  | 0      | 0.436  | 0.00506 |
| CTD-2373N4  | -0.418 | -0.04  | -0.18  | -0.901 | -0.532 | 0.00508 |
| LHPP        | -0.077 | -0.144 | -0.151 | 0.071  | 0.438  | 0.00509 |
| UTP3        | 0.429  | 0.242  | 0.179  | 0.491  | 0.187  | 0.00509 |
| RAB38       | 0.192  | 0.353  | 0.531  | 1.017  | 0.479  | 0.0051  |
| RP11-113K2  | -0.497 | -0.014 | 0.194  | -0.077 | -0.229 | 0.0051  |
| RP11-389O2  | -0.372 | -0.353 | -0.25  | -0.439 | -0.18  | 0.00511 |
| RP11-1334A  | -1.015 | -0.509 | -0.239 | -0.263 | -0.862 | 0.00512 |
| GAB3        | -0.11  | -0.344 | -0.033 | -0.308 | 0.22   | 0.00514 |
| RP11-351I24 | -0.237 | -0.137 | -0.073 | -0.577 | -0.352 | 0.00514 |
| IZUMO4      | -0.285 | 0.265  | 0.647  | -0.096 | 0.115  | 0.00516 |
| RP3-427A4.2 | -0.194 | -0.151 | -0.077 | -0.186 | -0.501 | 0.00516 |
| RP11-392P7  | -0.148 | -0.078 | -0.063 | 0.213  | 0.786  | 0.00519 |
| RP11-234P3  | 0.128  | 0.097  | -0.082 | 0.304  | 0.471  | 0.00521 |
| ADIRF-AS1   | -0.167 | 0.266  | 0.032  | -0.557 | -0.259 | 0.00523 |
| GLUDP3      | 0.128  | 0.214  | 0.382  | -0.237 | -0.256 | 0.00524 |
| TMEM188     | -0.081 | -0.048 | -0.022 | -0.33  | -0.217 | 0.00534 |
| ATP5S       | -0.063 | -0.081 | -0.011 | -0.163 | -0.399 | 0.00534 |
| GATSL3      | -0.93  | -0.343 | -0.539 | -0.427 | -0.266 | 0.00535 |
| RP11-397E7  | -0.399 | -0.398 | -0.197 | -0.362 | -0.431 | 0.00539 |
| SLC16A9     | -0.083 | -0.215 | -0.316 | -0.439 | -0.132 | 0.00541 |
| RP4-730K3.3 | 0.098  | 0.202  | 0.01   | -0.523 | -0.497 | 0.00542 |

|             |        |        |        |        |        |         |
|-------------|--------|--------|--------|--------|--------|---------|
| CTD-2515O1  | -0.384 | -0.21  | -0.247 | -0.381 | -0.621 | 0.00542 |
| XXbac-BPG1  | 0.28   | 0.233  | 0.139  | -0.316 | -0.702 | 0.00543 |
| ZBED3       | 0.402  | 0.143  | 0.07   | 0.312  | 0.441  | 0.00545 |
| RP11-506M1  | -0.28  | -0.069 | 0.097  | -0.622 | -0.872 | 0.00545 |
| SNRPEP2     | -0.182 | -0.112 | 0.005  | -0.368 | -0.421 | 0.00546 |
| RP11-500M8  | 0.351  | -0.009 | -0.362 | 0.044  | 0.038  | 0.0055  |
| ADIRF       | -0.085 | -0.207 | -0.071 | -0.201 | -0.363 | 0.00551 |
| PACSIN3     | 0.255  | 0.44   | 0.304  | 0.344  | 0.394  | 0.00553 |
| RP11-230F1  | -0.357 | -0.262 | -0.051 | -0.695 | -0.418 | 0.00556 |
| STIP1       | 0.236  | -0.023 | -0.074 | 0.357  | 0.174  | 0.00557 |
| PWWP2B      | 0.175  | -0.005 | -0.032 | -0.059 | 0.383  | 0.00559 |
| KATNBL1     | -0.448 | -0.036 | -0.062 | -0.42  | -0.329 | 0.0056  |
| RPS11P5     | -0.316 | -0.347 | -0.165 | -0.495 | -0.305 | 0.00564 |
| RP11-744D1  | -0.233 | -0.558 | -0.645 | -0.648 | -0.694 | 0.00568 |
| SF3B3       | 0.228  | 0.076  | 0.068  | 0.417  | 0.246  | 0.0057  |
| RP11-251M1  | -0.588 | -0.555 | -0.118 | -0.236 | -0.629 | 0.00571 |
| RP11-69I8.3 | -0.307 | -0.128 | -0.62  | -0.744 | -0.443 | 0.00573 |
| CKS1B       | -0.489 | -0.263 | -0.111 | -0.264 | -0.444 | 0.00575 |
| GOLGA8B     | -0.448 | 0.027  | 0.378  | -0.464 | -0.345 | 0.00577 |
| TTC9C       | -0.35  | -0.267 | -0.179 | -0.166 | -0.158 | 0.00583 |
| LRRC49      | 0.192  | -0.006 | 0.127  | 0.441  | 0.471  | 0.00584 |
| FKBP1B      | -0.106 | -0.226 | -0.223 | -0.193 | -0.345 | 0.00585 |
| FUNDC2      | -0.084 | -0.121 | -0.095 | -0.159 | -0.394 | 0.00585 |
| GTF2H5      | -0.215 | -0.145 | -0.056 | -0.304 | -0.493 | 0.00586 |
| RPP25       | -0.155 | -0.38  | -0.374 | -0.236 | -0.032 | 0.00587 |
| GPN3        | -0.056 | -0.035 | -0.009 | -0.051 | -0.346 | 0.00587 |
| ARPC5       | -0.156 | -0.108 | -0.149 | -0.376 | -0.38  | 0.00588 |
| RP11-159J3. | 0.337  | -0.051 | 0.023  | 0.521  | 0.502  | 0.00589 |
| MT-TW       | -0.193 | -0.154 | 0.3    | -0.719 | -0.443 | 0.00591 |
| APOO        | 0.048  | 0.035  | -0.073 | -0.094 | -0.361 | 0.00595 |
| SNORA72     | -0.257 | 0.257  | 0.13   | -0.63  | -0.61  | 0.00596 |
| RP11-797A1  | -0.375 | 0.01   | 0.095  | -0.853 | -0.525 | 0.00599 |
| RUNDC3B     | 0.202  | 0.27   | -0.099 | -0.163 | -0.357 | 0.006   |
| HSP90AB2P   | 0.392  | -0.186 | -0.177 | 0.31   | 0.196  | 0.00603 |
| NFIC        | 0.11   | -0.085 | 0.039  | 0.251  | 0.324  | 0.00606 |
| RP11-631M6  | 0.157  | 0.12   | 0.243  | 0.346  | 0.497  | 0.00608 |
| HTATSF1P2   | 0.002  | -0.009 | 0.322  | 0.514  | -0.347 | 0.00609 |
| CTD-3035D6  | -0.46  | -0.388 | -0.272 | -0.609 | -0.47  | 0.00609 |

|             |        |        |        |        |        |         |
|-------------|--------|--------|--------|--------|--------|---------|
| CMC1        | -0.321 | -0.217 | -0.093 | -0.349 | -0.512 | 0.00612 |
| CTD-2003C8  | 0.111  | 0.068  | 0.136  | 0.295  | 0.653  | 0.00615 |
| POTEKP      | 0.296  | -0.159 | -0.372 | -0.04  | -0.321 | 0.00617 |
| ZNF816      | -0.563 | -0.073 | 0.017  | -0.126 | -0.1   | 0.0062  |
| RP11-305O4  | 0.005  | -0.112 | -0.25  | -0.388 | -0.947 | 0.0062  |
| MIR7111     | -0.661 | -0.605 | -0.608 | -1.047 | -1.018 | 0.00625 |
| RP11-680A1  | -0.211 | -0.269 | -0.147 | -0.075 | 0.387  | 0.00626 |
| RP11-37J13. | 0.354  | 0.134  | -0.161 | 0.211  | 0.377  | 0.00626 |
| RP11-807H7  | -0.449 | -0.318 | -0.336 | -0.595 | -0.987 | 0.00626 |
| TYW1B       | -0.355 | -0.147 | -0.378 | -0.391 | -0.761 | 0.00627 |
| RP11-603J24 | -0.5   | -0.151 | 0.06   | -0.573 | -0.234 | 0.00628 |
| TMSB15A     | -0.4   | -0.179 | -0.164 | -0.725 | -0.613 | 0.00628 |
| SFXN4       | -0.104 | -0.14  | -0.086 | -0.118 | -0.434 | 0.00629 |
| KCTD21      | 0.332  | 0.207  | 0.314  | 0.393  | 0.354  | 0.00636 |
| TMEM240     | -0.073 | -0.207 | -0.182 | -0.325 | 0.471  | 0.00637 |
| SMARCA4     | 0.247  | 0.04   | 0.029  | 0.37   | 0.286  | 0.00637 |
| AC017080.1  | -0.381 | -0.254 | -0.007 | -0.564 | -0.923 | 0.00637 |
| RP1-182O16  | -0.276 | -0.347 | -0.132 | -0.65  | -0.516 | 0.00644 |
| EDA         | 0.59   | 0.196  | 0.335  | 0.478  | 0      | 0.00645 |
| RP11-557J10 | 0.47   | 0.018  | 0.086  | 0.504  | 0.454  | 0.00646 |
| RP11-503E2  | 0.206  | 0.224  | 0.567  | -0.544 | -0.157 | 0.00646 |
| SELT        | -0.343 | -0.172 | -0.113 | -0.54  | -0.36  | 0.00649 |
| NDST2       | -0.391 | 0.193  | -0.057 | 0.021  | 0.311  | 0.00656 |
| AP006621.6  | -0.635 | 0.126  | 0.196  | -0.352 | -0.184 | 0.00657 |
| RP11-143K1  | -0.273 | -0.086 | 0.397  | -0.748 | -0.286 | 0.00657 |
| RN7SL145P   | -0.562 | -0.007 | 0.142  | -0.585 | -0.716 | 0.00663 |
| GPR157      | 0.326  | -0.011 | 0.09   | -0.011 | -0.075 | 0.00666 |
| FBXO48      | -0.194 | -0.009 | -0.201 | -0.523 | -0.538 | 0.00673 |
| CTD-2649C1  | -0.459 | -0.018 | 0.256  | -0.567 | -0.249 | 0.00676 |
| RP11-1055B  | -0.962 | -0.378 | -0.307 | -0.968 | -0.492 | 0.00676 |
| ALKBH2      | -0.412 | -0.379 | -0.327 | -0.367 | -0.661 | 0.00677 |
| RP11-392O1  | 0.016  | -0.179 | -0.044 | 0.477  | 0.316  | 0.00679 |
| VPS29       | -0.277 | -0.073 | 0.036  | -0.23  | -0.375 | 0.00679 |
| RP5-1142A6  | -0.225 | -0.255 | -0.825 | -0.883 | -0.62  | 0.0068  |
| AC005932.1  | -0.616 | -0.453 | -0.043 | -0.328 | 0.076  | 0.00683 |
| C11orf98    | -0.083 | 0.057  | 0.04   | -0.121 | -0.488 | 0.00684 |
| LRRRC69     | -0.713 | 0.135  | 0.207  | -0.42  | -0.303 | 0.00685 |
| RAD51B      | 0.047  | -0.194 | -0.024 | 0.457  | 0.275  | 0.00687 |

|             |        |        |        |        |        |         |
|-------------|--------|--------|--------|--------|--------|---------|
| NEURL2      | -0.274 | 0.455  | 0.397  | -0.228 | 0.268  | 0.00688 |
| MPZ         | -0.585 | -0.139 | -0.339 | -0.483 | 0.264  | 0.00688 |
| CAD         | -0.132 | -0.116 | -0.074 | -0.164 | -0.357 | 0.00688 |
| MTL5        | -0.53  | -0.157 | 0.082  | -0.181 | -0.318 | 0.00692 |
| AC010733.5  | -0.527 | 0.233  | 0.209  | -0.636 | -0.412 | 0.00692 |
| U40455.1    | -0.21  | -0.515 | -0.226 | -0.118 | -0.392 | 0.00694 |
| AC141586.5  | -0.212 | -0.268 | -0.268 | -0.606 | -0.459 | 0.00695 |
| RP11-449M6  | 0.104  | -0.057 | -0.336 | 0.112  | 0.217  | 0.00696 |
| CTD-2528L1  | -0.109 | -0.303 | -0.218 | -0.5   | -0.819 | 0.00698 |
| TRAPPC6A    | 0.019  | -0.007 | -0.102 | 0.121  | 0.489  | 0.00699 |
| RP13-178D1  | 0.367  | 0.092  | 0.131  | 0.439  | 0.183  | 0.00703 |
| RP11-497D6  | -0.494 | -0.432 | -0.177 | -0.52  | -0.477 | 0.00704 |
| CAPNS2      | -0.172 | -0.354 | -0.361 | -0.532 | -1.082 | 0.00704 |
| AC091729.9  | -0.586 | -0.202 | -0.072 | -0.405 | -0.534 | 0.00711 |
| CMB9-55F22  | -0.496 | -0.049 | 0.115  | -0.431 | -0.273 | 0.00714 |
| TFIP11      | 0.263  | 0.238  | 0.117  | 0.443  | 0.226  | 0.00718 |
| MIR5010     | -0.248 | 0.421  | 0.551  | -0.301 | -0.296 | 0.00721 |
| SNORA64     | -0.243 | -0.164 | -0.049 | -0.837 | -0.813 | 0.00722 |
| RP11-3D4.3  | -0.062 | 0.266  | 0.261  | -0.558 | -0.249 | 0.00723 |
| RP11-736L2  | 0.449  | 0.218  | 0.142  | 0.591  | 0.38   | 0.00725 |
| MED7        | -0.419 | -0.191 | -0.171 | -0.15  | -0.427 | 0.00727 |
| C14orf93    | 0.287  | 0.186  | 0.413  | 0.599  | 0.425  | 0.00732 |
| KIF27       | -0.585 | 0.178  | 0.054  | -0.323 | -0.1   | 0.00738 |
| VAMP4       | -0.365 | -0.134 | -0.089 | -0.371 | -0.128 | 0.00739 |
| PMF1-BGLA   | -0.385 | 0.194  | -0.363 | -0.126 | 0.59   | 0.00743 |
| CIDEB       | 0.136  | -0.199 | -0.426 | -0.454 | -0.778 | 0.00745 |
| KBTBD3      | -0.651 | -0.211 | 0.022  | 0.008  | -0.178 | 0.00747 |
| RP11-386G1  | -0.696 | -1.125 | -0.556 | -0.592 | -0.882 | 0.00747 |
| XKR6        | -0.067 | -0.173 | 0.034  | -0.141 | 0.506  | 0.00753 |
| RP11-454L9  | -0.117 | 0.54   | 0.273  | -0.487 | -0.328 | 0.00753 |
| RN7SKP70    | -0.578 | 0.212  | 0.239  | -0.445 | -0.548 | 0.00753 |
| RP11-79P5.1 | -0.155 | -0.324 | -0.203 | -0.294 | -0.589 | 0.00753 |
| CEP19       | 0.013  | 0.031  | 0.067  | 0.316  | 0.69   | 0.00758 |
| PIK3R4      | 0.235  | 0.361  | 0.113  | 0.29   | 0.287  | 0.00758 |
| CFL1P4      | 0.451  | 0.06   | -0.132 | 0.356  | 0.196  | 0.00758 |
| CHCHD1      | -0.264 | -0.225 | -0.08  | -0.357 | -0.441 | 0.00764 |
| RP11-4C20.4 | -0.518 | -0.154 | -0.143 | -0.355 | 0.481  | 0.00766 |
| AF129075.5  | -0.272 | -0.067 | -0.107 | -0.82  | -0.793 | 0.00766 |

|            |        |        |        |        |        |         |
|------------|--------|--------|--------|--------|--------|---------|
| AC005332.1 | 0.014  | -0.168 | 0.115  | 0.085  | 0.476  | 0.00769 |
| MIR93      | 0.198  | -0.121 | -0.106 | -0.679 | -0.079 | 0.00769 |
| RWDD3      | -0.308 | 0.068  | 0.129  | -0.364 | -0.368 | 0.00769 |
| RGPD5      | 0.719  | -0.096 | -0.257 | 0.082  | 0.17   | 0.00771 |
| IMMTP      | 0.569  | 0.259  | 0.129  | 0.451  | 0.429  | 0.00774 |
| HSPB6      | 0.28   | 0.213  | -0.189 | 0.264  | 0.729  | 0.00776 |
| RP11-142A2 | 0.182  | 0.09   | 0.028  | 0.339  | 0.285  | 0.00776 |
| SF3B2      | 0.366  | 0.093  | 0.026  | 0.368  | 0.181  | 0.00776 |
| CTD-2186M1 | -0.017 | -0.305 | -0.713 | -0.533 | -0.772 | 0.00777 |
| AC012262.1 | -0.164 | -0.358 | -0.159 | -0.08  | 0.485  | 0.00781 |
| AC090952.4 | -0.223 | 0.125  | 0.101  | 0.072  | 0.424  | 0.00781 |
| ITM2C      | 0.26   | 0.221  | 0.211  | 0.476  | 0.498  | 0.00782 |
| GGT7       | 0.061  | 0.142  | 0.412  | -0.015 | 0.43   | 0.00788 |
| CENPW      | -0.331 | -0.049 | 0.002  | -0.078 | -0.417 | 0.00791 |
| ITGA4      | 0.225  | 0.024  | -0.155 | 0.286  | 0.44   | 0.00792 |
| RP11-535A1 | -0.564 | -0.201 | -0.016 | -0.317 | 0.323  | 0.00792 |
| AC092662.3 | 0.194  | -0.231 | -0.163 | 0.383  | 0.13   | 0.00795 |
| RP11-667M1 | 0.387  | 0.049  | -0.033 | 0.209  | 0.102  | 0.00797 |
| NET1       | -0.34  | -0.171 | -0.134 | -0.534 | -0.298 | 0.00797 |
| CCDC77     | -0.193 | -0.064 | -0.378 | -0.039 | -0.082 | 0.00799 |
| CGNL1      | -0.326 | -0.42  | 0.011  | -0.286 | -0.061 | 0.008   |
| SLC2A10    | 0.321  | 0.208  | 0.227  | 0.474  | 0.493  | 0.00801 |
| DHX9       | 0.46   | 0.135  | -0.01  | 0.348  | 0.329  | 0.00801 |
| RP11-44M6  | -0.473 | -0.201 | -0.17  | -0.678 | -0.454 | 0.00805 |
| RP11-402K9 | 0.189  | -0.234 | -0.433 | -0.114 | -0.588 | 0.00811 |
| RP11-382A1 | -0.295 | -0.577 | 0.102  | 0.159  | 0.287  | 0.00812 |
| VMAC       | -0.293 | 0.144  | 0.412  | -0.192 | 0.188  | 0.00812 |
| RP11-667K1 | 0.31   | 0.106  | 0.128  | 0.148  | -0.585 | 0.00813 |
| MATR3      | 0.378  | -0.062 | -0.147 | 0.228  | 0.058  | 0.00814 |
| RP11-34P13 | -0.176 | 0.055  | 0.054  | -0.609 | -0.485 | 0.00815 |
| RP3-508I15 | -0.185 | 0.073  | -0.036 | -0.571 | -0.879 | 0.00818 |
| USMG5      | -0.405 | -0.159 | -0.028 | -0.655 | -0.512 | 0.00821 |
| RP11-1112J | 0.583  | 0.063  | -0.08  | 0.371  | 0.241  | 0.00822 |
| PCBP2-OT1  | -0.6   | -0.142 | -0.246 | -0.986 | -0.689 | 0.00822 |
| AL132709.1 | -0.237 | 0.096  | -0.071 | -0.788 | -0.71  | 0.00822 |
| NCRNA0018  | -0.714 | -0.244 | 0.071  | -0.477 | -0.246 | 0.00824 |
| CTA-204B4  | -0.499 | -0.094 | 0.04   | -0.701 | -0.473 | 0.00824 |
| YDJC       | -0.149 | -0.29  | -0.338 | -0.289 | -0.048 | 0.00826 |

|             |        |        |        |        |        |         |
|-------------|--------|--------|--------|--------|--------|---------|
| SNRPG       | -0.211 | 0.108  | 0.085  | -0.434 | -0.575 | 0.00828 |
| RP11-108L7. | -0.569 | -0.497 | -0.382 | -0.507 | -1.131 | 0.00831 |
| RP11-447D1  | -0.49  | -0.183 | -0.097 | -0.129 | 0.348  | 0.0084  |
| TMEM126B    | -0.339 | -0.19  | -0.057 | -0.54  | -0.429 | 0.0084  |
| AAMP        | 0.186  | 0.08   | 0.02   | 0.332  | 0.158  | 0.00843 |
| FAM101A     | 0.476  | 0.496  | 0.093  | 0.438  | 0.33   | 0.00848 |
| ECSIT       | 0.169  | 0.06   | 0.114  | 0.396  | 0.189  | 0.00851 |
| SNORD26     | -0.222 | 0.011  | -0.093 | -0.733 | -0.84  | 0.00855 |
| RP11-365D2  | -0.052 | -0.328 | -0.144 | -0.313 | -0.393 | 0.00857 |
| RP5-1017O1  | 0.324  | -0.106 | -0.181 | 0.105  | 0.011  | 0.00858 |
| LYPLA2P2    | 0.286  | 0.003  | 0.195  | 0.325  | 0.53   | 0.00859 |
| CTB-31O20.1 | -0.304 | -0.009 | -0.307 | -0.702 | -0.498 | 0.00861 |
| HNRPCP      | -0.269 | -0.015 | 0.102  | -0.325 | -0.645 | 0.00863 |
| RP1-167A14  | -0.406 | -0.44  | 0.325  | -0.469 | -0.714 | 0.00864 |
| STAG3L3     | -0.655 | -0.318 | 0.268  | -0.153 | -0.476 | 0.00868 |
| RF00015     | -0.253 | 0.018  | 0.055  | -0.679 | -0.704 | 0.00874 |
| GTF2F1      | 0.324  | 0.162  | 0.052  | 0.417  | 0.217  | 0.00878 |
| FAH         | 0.197  | 0.124  | 0.107  | 0.352  | 0.261  | 0.00884 |
| RF00012     | -0.573 | -0.151 | -0.092 | -0.687 | -0.928 | 0.00885 |
| ZNF549      | -0.187 | 0.115  | 0.042  | -0.432 | -0.105 | 0.00898 |
| TMEM86B     | -0.251 | 0.044  | 0.346  | -0.42  | -0.406 | 0.00898 |
| COMMD1      | -0.29  | -0.11  | -0.034 | -0.27  | -0.362 | 0.00902 |
| CSNK1A1L    | 0.368  | -0.07  | -0.023 | 0.133  | 0.166  | 0.00903 |
| ZNF132      | -0.455 | 0.113  | -0.132 | -0.264 | 0.061  | 0.00905 |
| LYRM5       | -0.281 | 0.077  | 0.103  | -0.055 | -0.365 | 0.00906 |
| SNORD10     | -0.466 | -0.256 | -0.266 | -0.91  | -0.572 | 0.00907 |
| IER5L       | 0.309  | 0.183  | 0.23   | 0.327  | 0.506  | 0.00908 |
| CTD-2538GC  | 0.074  | 0.595  | 0.148  | -0.558 | -0.051 | 0.00908 |
| ZNF708      | -0.133 | 0.053  | 0.232  | -0.426 | 0.175  | 0.00914 |
| MSMP        | 0.138  | -0.177 | -0.45  | -0.153 | -0.006 | 0.00914 |
| RP11-199A1  | 0.239  | -0.094 | -0.132 | 0.425  | 0.013  | 0.00915 |
| CST1        | 0.473  | 0.138  | -0.218 | 0.13   | -0.034 | 0.00917 |
| COA6        | -0.289 | -0.213 | -0.038 | -0.238 | -0.502 | 0.0092  |
| RP11-329L6. | -0.419 | 0.053  | -0.121 | -0.485 | -0.751 | 0.00921 |
| RP11-613C6  | -0.244 | -0.235 | -0.516 | -0.309 | -0.315 | 0.00927 |
| RPS18P12    | -0.397 | -0.354 | -0.134 | -0.535 | -0.413 | 0.0093  |
| UQCR11      | -0.315 | -0.218 | -0.089 | -0.352 | -0.269 | 0.00937 |
| MIR553      | -0.32  | 0.59   | 0.199  | 0.024  | -0.374 | 0.00937 |

|             |        |        |        |        |        |         |
|-------------|--------|--------|--------|--------|--------|---------|
| LURAP1      | -0.152 | 0.046  | 0.26   | 0.132  | -0.432 | 0.00937 |
| RP1-193M11  | 0.263  | -0.01  | -0.073 | 0.378  | 0.198  | 0.00939 |
| IGLV1-51    | -0.329 | 0.495  | 0.352  | -0.451 | -0.147 | 0.0094  |
| C11orf54    | 0.076  | 0.157  | 0.26   | 0.416  | 0.232  | 0.00941 |
| RP11-463H1  | -0.229 | -0.222 | -0.147 | -0.376 | -0.451 | 0.00942 |
| TMEM102     | -0.245 | -0.046 | 0.012  | 0.394  | 0.105  | 0.00945 |
| RP11-629O4  | 0.134  | -0.052 | -0.085 | -0.222 | -0.879 | 0.00945 |
| RP4-734P14  | -0.196 | -0.043 | -0.248 | -0.975 | -0.436 | 0.0095  |
| RP11-314A2  | -0.681 | -0.669 | -0.235 | -0.841 | -0.678 | 0.0095  |
| TXNDC17     | -0.356 | -0.275 | -0.099 | -0.544 | -0.324 | 0.00959 |
| RP11-697N1  | 0.072  | -0.248 | -0.205 | -0.268 | -0.37  | 0.0096  |
| RP11-183E9  | -0.097 | -0.701 | -0.39  | -0.363 | -0.94  | 0.00963 |
| SPATA2      | 0.347  | 0.188  | 0.013  | 0.206  | 0.234  | 0.00965 |
| CTD-3065B2  | -0.313 | -0.495 | -0.327 | -0.521 | -0.504 | 0.00967 |
| UBE2W       | -0.285 | -0.001 | -0.024 | -0.377 | -0.022 | 0.00969 |
| MRPL42      | -0.262 | -0.121 | -0.173 | -0.372 | -0.367 | 0.00971 |
| SNORD19B    | -0.496 | -0.043 | 0.083  | -0.674 | -0.696 | 0.00971 |
| RP11-319J2  | 0.06   | -0.118 | -0.144 | -0.196 | 0.564  | 0.00974 |
| VDAC1LP     | 0.363  | 0.032  | -0.119 | 0.182  | 0.053  | 0.00974 |
| RP11-305M3  | 0.004  | 0.092  | 0.338  | 0.261  | 0.024  | 0.00976 |
| RP11-65L3.2 | -0.856 | 0.018  | -0.079 | -0.475 | -0.109 | 0.00977 |
| ZNF879      | -0.475 | 0.031  | -0.074 | -0.323 | -0.411 | 0.00977 |
| ZNF782      | -0.228 | 0.134  | -0.001 | -0.261 | -0.363 | 0.00978 |
| CORO1A      | 0.092  | -0.196 | -0.363 | 0.002  | -0.435 | 0.00986 |
| GSPT2       | 0.151  | -0.032 | -0.092 | 0.331  | 0.273  | 0.00992 |
| RP3-323K23  | -0.271 | -0.453 | -0.425 | -0.328 | -1.082 | 0.00994 |
| AJ271735.3  | -0.18  | -0.497 | -0.469 | -0.536 | -0.58  | 0.00999 |
| RP11-335F8  | 0.372  | -0.031 | -0.132 | 0.324  | 0.075  | 0.01    |
| AC055811.5  | 0.24   | -0.35  | -0.395 | -0.06  | 0.007  | 0.01    |
| CCNO        | 0.041  | 0.347  | -0.085 | -0.242 | -0.626 | 0.01    |
| MT-TI       | -0.151 | -0.15  | 0.254  | -0.57  | -0.741 | 0.01    |
| RP11-848P1  | 0.294  | 0.315  | 0.397  | 0.175  | 1.08   | 0.0101  |
| WDR92       | -0.047 | 0.067  | 0.209  | 0.349  | 0.413  | 0.0101  |
| KHK         | -0.298 | -0.354 | -0.558 | -0.071 | 0.187  | 0.0101  |
| ZNF404      | -0.534 | 0.15   | 0.395  | -0.057 | -0.211 | 0.0101  |
| RP11-234A1  | -0.28  | -0.207 | -0.007 | -0.427 | -0.377 | 0.0101  |
| RP11-53O19  | -0.24  | -0.057 | -0.031 | -0.786 | -0.389 | 0.0101  |
| AC108463.2  | 0.361  | -0.158 | 0.009  | 0.189  | 0.879  | 0.0102  |



|             |        |        |        |        |        |        |
|-------------|--------|--------|--------|--------|--------|--------|
| PA2G4P1     | 0.576  | 0.15   | 0.112  | 0.422  | -0.019 | 0.0102 |
| RP5-1059L7. | -0.198 | -0.409 | -0.072 | 0.036  | 0.52   | 0.0103 |
| ALDOAP1     | 0.197  | -0.33  | -0.426 | -0.036 | 0.238  | 0.0103 |
| UBE2Q2P1    | -0.155 | 0.033  | 0.381  | -0.435 | 0.16   | 0.0103 |
| ELAC1       | -0.247 | 0.042  | -0.069 | -0.134 | -0.418 | 0.0103 |
| RP11-1020A  | -0.551 | 0.267  | 0.272  | -0.408 | -0.455 | 0.0103 |
| AL353997.7  | 0.082  | -0.111 | -0.109 | 0.01   | -0.387 | 0.0104 |
| RPL35       | -0.196 | -0.112 | -0.088 | -0.334 | -0.399 | 0.0104 |
| WASH2P      | -0.335 | -0.166 | 0.008  | -0.681 | -0.492 | 0.0104 |
| RP11-57H14  | -0.066 | -0.092 | 0.191  | -0.03  | 0.418  | 0.0105 |
| RHEBL1      | -0.43  | -0.19  | 0.225  | -0.038 | -0.179 | 0.0105 |
| TBX19       | -0.246 | 0.236  | 0.175  | -0.449 | -0.444 | 0.0105 |
| DPH6        | -0.057 | -0.116 | -0.013 | 0.045  | -0.458 | 0.0105 |
| SF3A3P1     | 0.364  | 0.148  | 0.12   | 0.465  | 0.331  | 0.0106 |
| HOMEZ       | -0.16  | 0.157  | 0.024  | 0.125  | 0.329  | 0.0106 |
| RP11-835E1  | -0.042 | 0.149  | 0.324  | 0.087  | -0.067 | 0.0106 |
| RP3-461F17  | -0.547 | -0.164 | 0.343  | -0.539 | -0.463 | 0.0106 |
| RP11-618G2  | -0.447 | -0.286 | -0.096 | -0.22  | -0.698 | 0.0106 |
| CTB-54O9.9  | -0.153 | -0.297 | -0.526 | -0.943 | -0.806 | 0.0106 |
| CTB-129O4.  | -0.476 | -0.425 | -0.425 | -0.927 | -0.975 | 0.0106 |
| RP11-422J8. | -0.235 | 0.008  | 0.008  | 0.495  | 0.387  | 0.0107 |
| EBPL        | -0.224 | -0.249 | -0.278 | -0.467 | -0.141 | 0.0107 |
| XXbac-B562l | -0.185 | -0.066 | 0.053  | 0.171  | -0.402 | 0.0107 |
| RP11-39C10  | 0.131  | -0.304 | -0.283 | -0.122 | -0.402 | 0.0107 |
| ARF4-AS1    | -0.618 | 0.191  | 0.061  | -0.401 | -0.668 | 0.0107 |
| RP11-434N1  | 0.259  | 0.093  | 0.144  | 0.175  | 0.485  | 0.0108 |
| IGSF8       | -0.038 | 0.029  | -0.193 | -0.017 | -0.384 | 0.0108 |
| CNN2P9      | 0.398  | 0.006  | -0.051 | 0.19   | 0.427  | 0.0109 |
| NFKBIL1     | 0.031  | 0.218  | 0.182  | 0.276  | 0.398  | 0.0109 |
| ASB13       | 0.017  | -0.2   | -0.446 | -0.146 | 0.002  | 0.0109 |
| AAR2        | 0.329  | 0.127  | -0.078 | 0.186  | -0.01  | 0.0109 |
| RP1-265C24  | -0.405 | -0.114 | -0.046 | -0.446 | -0.624 | 0.0109 |
| MRPL34      | -0.226 | -0.256 | -0.09  | -0.167 | -0.324 | 0.011  |
| RPS26       | -0.198 | -0.062 | -0.085 | -0.381 | -0.432 | 0.011  |
| NDUFB3      | -0.312 | -0.155 | -0.048 | -0.427 | -0.492 | 0.011  |
| RN7SL431P   | 0.181  | -0.112 | 0.094  | -0.655 | -0.537 | 0.011  |
| CNN2P4      | 0.56   | 0.002  | -0.02  | 0.136  | 0.447  | 0.0111 |
| RP4-652L8.2 | 0.492  | 0.115  | 0.049  | 0.028  | -0.048 | 0.0111 |

|             |        |        |        |        |        |        |
|-------------|--------|--------|--------|--------|--------|--------|
| RP11-352E6  | -0.177 | -0.331 | 0.02   | -0.756 | -0.818 | 0.0111 |
| TMEM156     | 0.173  | -0.098 | -0.223 | -0.013 | 0.411  | 0.0112 |
| GOLGA8N     | -0.191 | 0.211  | 0.482  | -0.072 | 0.126  | 0.0112 |
| LRRC75A-A5  | -0.317 | -0.19  | -0.076 | -0.484 | -0.256 | 0.0112 |
| RPS7P1      | -0.223 | -0.086 | -0.065 | -0.452 | -0.394 | 0.0112 |
| CENPS       | -0.587 | -0.427 | 0.005  | -0.163 | -0.47  | 0.0112 |
| RP11-97C16  | -0.369 | 0.057  | 0.149  | -0.493 | -0.502 | 0.0112 |
| RPS10       | -0.245 | -0.184 | -0.072 | -0.405 | -0.53  | 0.0112 |
| AC090421.1  | -0.443 | -0.237 | -0.28  | -0.499 | -0.622 | 0.0113 |
| RP11-148B6  | -0.298 | -0.284 | -0.33  | -0.48  | -0.668 | 0.0113 |
| ZNF680      | -0.22  | 0.076  | -0.265 | -0.512 | -0.004 | 0.0114 |
| ZFAND1      | -0.333 | -0.19  | -0.068 | -0.474 | -0.366 | 0.0115 |
| RNASEH1P1   | 0.243  | -0.293 | 0.008  | 0.103  | -0.474 | 0.0115 |
| RP11-848P1  | -0.379 | -0.089 | -0.601 | -0.675 | -0.95  | 0.0115 |
| NBPF10      | -0.178 | 0.128  | -0.157 | -0.46  | 0.144  | 0.0116 |
| RP11-1A15.2 | 0.345  | -0.143 | -0.106 | 0.188  | -0.164 | 0.0116 |
| CD46P       | -0.427 | -0.818 | -0.493 | -0.322 | -0.174 | 0.0116 |
| MIR5581     | -0.903 | -0.41  | -0.217 | -0.912 | -0.576 | 0.0116 |
| NSMCE4A     | -0.311 | -0.132 | -0.076 | -0.275 | -0.337 | 0.0117 |
| AL121652.2  | -0.097 | -0.43  | -0.323 | -0.251 | -0.612 | 0.0117 |
| RP11-321E8  | 0.337  | -0.003 | -0.007 | 0.319  | 0.169  | 0.0118 |
| RP11-324I22 | -0.576 | -0.243 | 0.089  | -0.104 | 0.105  | 0.0118 |
| MED11       | -0.243 | -0.181 | -0.026 | -0.144 | -0.439 | 0.0118 |
| RP11-3J10.5 | -0.042 | -0.261 | -0.845 | -0.176 | -0.614 | 0.0118 |
| RP11-420J1  | 0.158  | -0.023 | 0.296  | 0.451  | 0.557  | 0.0119 |
| PARP1       | 0.402  | 0.106  | -0.061 | 0.306  | 0.051  | 0.0119 |
| REP15       | -0.394 | 0.078  | 0.285  | 0.163  | 0.346  | 0.012  |
| ZSCAN26     | -0.382 | -0.045 | 0.05   | -0.114 | -0.082 | 0.012  |
| SMDT1       | -0.165 | -0.185 | -0.013 | -0.246 | -0.37  | 0.012  |
| UFSP1       | -0.927 | -0.373 | -0.474 | -0.615 | -0.524 | 0.012  |
| CTD-2371O3  | -0.621 | -0.383 | -0.139 | -0.742 | -0.61  | 0.012  |
| AC002407.1  | -0.366 | -0.561 | -0.325 | -0.476 | -0.774 | 0.012  |
| SKIV2L2     | 0.346  | 0.183  | 0.079  | 0.386  | 0.238  | 0.0121 |
| RP1-222H5.1 | -0.24  | -0.353 | -0.157 | 0.047  | -0.223 | 0.0121 |
| RP11-823P9  | -0.038 | 0.087  | -0.024 | -0.484 | -0.372 | 0.0121 |
| EFNB3       | -0.034 | 0.321  | 0.059  | 0.175  | 0.563  | 0.0122 |
| ITGB4       | 0.343  | -0.15  | 0.028  | 0.439  | 0.274  | 0.0122 |
| SNORD15B    | -0.503 | 0.017  | -0.221 | -0.677 | -0.867 | 0.0123 |

|             |        |        |        |        |        |        |
|-------------|--------|--------|--------|--------|--------|--------|
| SERTAD4     | 0.404  | 0.036  | 0.186  | 0.299  | 0.591  | 0.0124 |
| HLA-H       | 0.351  | 0.295  | 0.113  | 0.34   | 0.621  | 0.0125 |
| MIR186      | -0.058 | 0.171  | 0.263  | -0.653 | -0.221 | 0.0125 |
| CTC-459F4.1 | -0.416 | -0.064 | -0.045 | -0.279 | -0.309 | 0.0125 |
| RP11-185N2  | -0.152 | 0.16   | 0.278  | -0.138 | -0.412 | 0.0125 |
| RP11-408A1  | -0.061 | 0.123  | 0.117  | -0.581 | -0.561 | 0.0125 |
| BLOC1S1     | -0.266 | -0.19  | -0.101 | -0.397 | -0.374 | 0.0126 |
| CHRNA10     | -0.22  | -0.118 | -0.072 | -0.834 | -0.574 | 0.0126 |
| C21orf33    | 0.087  | -0.197 | -0.074 | 0.515  | 0.464  | 0.0127 |
| HS6ST1      | 0.301  | 0.202  | 0.091  | 0.34   | -0.054 | 0.0127 |
| C17orf58    | -0.482 | -0.281 | 0.018  | -0.199 | -0.237 | 0.0127 |
| RP4-739H11  | -0.293 | -0.086 | 0.304  | -0.598 | -0.357 | 0.0127 |
| ZNF107      | 0.013  | 0.022  | -0.18  | -0.451 | -0.063 | 0.0128 |
| CATSPER2    | -0.478 | -0.016 | 0.21   | -0.495 | -0.587 | 0.0128 |
| RP11-48B3.2 | -0.042 | -0.131 | -0.378 | -0.264 | 0.582  | 0.0129 |
| HIN1L       | -0.013 | 0.346  | 0.109  | 0.061  | 0.339  | 0.0129 |
| ZNF212      | 0.382  | 0.064  | 0.102  | 0.142  | 0.033  | 0.0129 |
| ENO3        | -0.203 | 0.073  | 0.465  | -0.184 | -0.073 | 0.0129 |
| RP11-467I2C | -0.333 | -0.543 | -0.169 | -0.453 | -0.604 | 0.0129 |
| RP11-500G2  | -0.52  | -0.237 | 0.013  | 0.06   | 0.49   | 0.013  |
| RP11-328C8  | 0.172  | 0.016  | 0.06   | 0.323  | 0.469  | 0.013  |
| KRTCAP3     | -0.037 | -0.13  | 0.128  | -0.833 | -0.179 | 0.013  |
| GS1-324M7.1 | -0.174 | -0.078 | -0.09  | -0.374 | -0.697 | 0.013  |
| RP11-341G2  | -0.579 | -0.491 | -0.288 | -0.914 | -0.946 | 0.013  |
| BAG6        | 0.184  | 0.17   | 0.161  | 0.397  | 0.258  | 0.0131 |
| SUB1        | -0.071 | -0.054 | -0.108 | -0.382 | -0.294 | 0.0131 |
| LINC00632   | -0.094 | -0.008 | -0.206 | -0.418 | -0.858 | 0.0132 |
| MYL4        | -0.003 | 0.115  | 0.55   | 0.027  | 0.825  | 0.0133 |
| ZBTB12      | -0.597 | -0.649 | -0.079 | -0.156 | -0.171 | 0.0133 |
| RP11-425M5  | -0.427 | -0.158 | -0.071 | -0.872 | -0.481 | 0.0133 |
| AC073310.4  | -0.153 | -0.658 | -0.465 | -0.013 | 0.011  | 0.0134 |
| RP11-261A1  | 0.417  | -0.007 | 0.095  | 0.348  | 0.361  | 0.0135 |
| CTNBL1      | 0.286  | 0.065  | 0.033  | 0.382  | 0.225  | 0.0135 |
| OLMALINC    | -0.475 | -0.036 | -0.006 | -0.414 | -0.205 | 0.0135 |
| RP11-169D4  | -0.067 | -0.128 | 0.123  | 0.407  | 0.393  | 0.0136 |
| GPB1        | 0.386  | -0.181 | -0.137 | -0.125 | 0.454  | 0.0137 |
| AC007272.2  | -0.012 | 0.287  | -0.086 | 0.455  | 0.309  | 0.0138 |
| RP13-77O11  | -0.275 | -0.343 | -0.168 | -0.313 | -0.324 | 0.0138 |

|             |        |        |        |        |        |        |
|-------------|--------|--------|--------|--------|--------|--------|
| RP1-12G14.1 | -0.447 | -0.447 | -0.318 | -0.53  | -0.515 | 0.0138 |
| RP11-182B2  | -0.365 | -0.582 | -0.618 | -0.6   | -0.64  | 0.0139 |
| KYNU        | 0.173  | 0.26   | 0.391  | 0.533  | 0.114  | 0.014  |
| RP11-384L8  | 0.388  | -0.171 | -0.16  | -0.327 | -0.547 | 0.0141 |
| CNIH4       | -0.418 | -0.289 | -0.11  | -0.355 | -0.223 | 0.0142 |
| ZNF534      | -0.158 | -0.124 | -0.229 | -0.223 | -0.68  | 0.0142 |
| INAFM1      | 0.214  | 0.066  | -0.123 | -0.403 | -0.08  | 0.0143 |
| NSL1        | -0.266 | -0.122 | 0.019  | -0.073 | -0.336 | 0.0143 |
| MRPL54      | -0.201 | -0.228 | -0.142 | -0.286 | -0.441 | 0.0143 |
| RP11-255N2  | 0.338  | 0.155  | 0.109  | 0.51   | 0.027  | 0.0144 |
| RP11-166O4  | -0.356 | -0.215 | -0.089 | -0.396 | -0.301 | 0.0144 |
| RF00275     | -0.421 | 0.103  | 0.285  | -0.306 | -0.569 | 0.0144 |
| TLCD2       | 0.06   | 0.092  | 0.48   | 0.224  | 0.488  | 0.0145 |
| RP11-318C2  | -0.412 | -0.455 | -0.405 | -0.867 | -0.733 | 0.0145 |
| AC023468.2  | 0.418  | 0.108  | 0.211  | 0.459  | 0.565  | 0.0146 |
| ZNF140      | 0.134  | 0.338  | 0.194  | -0.147 | 0.24   | 0.0146 |
| RP11-297D2  | -0.912 | -0.252 | -0.172 | -0.456 | -0.184 | 0.0146 |
| DISP1       | -0.149 | -0.039 | -0.046 | -0.09  | -0.512 | 0.0146 |
| LINC-PINT   | -0.576 | 0.037  | 0.186  | -0.502 | -0.187 | 0.0147 |
| AK4P1       | 0.289  | 0.04   | -0.113 | 0.183  | 0.442  | 0.0148 |
| AC093724.1  | 0.422  | 0.293  | 0.371  | 0.232  | 0.408  | 0.0148 |
| SLC25A45    | -0.37  | 0.083  | 0.484  | 0.051  | 0.213  | 0.0148 |
| KANSL1L     | 0.202  | 0.423  | 0.239  | -0.162 | 0.168  | 0.0148 |
| CTD-2537I9  | -0.335 | 0.18   | 0.59   | -0.382 | 0.121  | 0.0148 |
| SSR4P1      | -0.134 | 0.273  | 0.465  | 0.242  | -0.111 | 0.0148 |
| MBOAT7      | -0.013 | -0.153 | -0.341 | -0.152 | -0.161 | 0.0148 |
| RP11-146F1  | -0.243 | -0.103 | -0.25  | -0.727 | -0.86  | 0.0148 |
| RP11-48B24  | -0.268 | -0.146 | 0.097  | -0.343 | -0.918 | 0.0148 |
| VWFP1       | 0.382  | 0.111  | -0.214 | 0.186  | 0.424  | 0.0149 |
| REC8        | -0.014 | -0.183 | 0.196  | -0.461 | 0.131  | 0.0149 |
| PCBD2       | -0.342 | -0.211 | 0.027  | -0.32  | -0.255 | 0.0149 |
| TMEM251     | -0.085 | -0.163 | -0.024 | -0.014 | -0.431 | 0.0149 |
| ZNF230      | 0.15   | 0.022  | -0.097 | -0.262 | -0.461 | 0.0149 |
| MIR4442     | 0.031  | -0.044 | -0.044 | 0.451  | 0.404  | 0.015  |
| HAGHL       | -0.321 | -0.032 | -0.146 | -0.599 | 0.214  | 0.015  |
| RP11-345K2  | -0.399 | -0.432 | -0.164 | -0.86  | -0.347 | 0.015  |
| RP11-1E11.1 | -0.367 | -0.495 | -0.467 | -0.023 | 0.382  | 0.0151 |
| TAF15       | 0.343  | 0.115  | 0.142  | 0.251  | 0.211  | 0.0151 |

|             |        |        |        |        |        |        |
|-------------|--------|--------|--------|--------|--------|--------|
| MT1P3       | 0.099  | -0.455 | 0.25   | 0.226  | -0.204 | 0.0151 |
| RP11-390K5  | -0.37  | -0.127 | 0.14   | -0.409 | -0.403 | 0.0151 |
| GPR89A      | -0.097 | -0.159 | -0.271 | -0.318 | -0.507 | 0.0151 |
| G6PD        | 0.282  | 0.123  | 0.083  | 0.508  | 0.247  | 0.0152 |
| TFF3        | -0.224 | -0.531 | -0.547 | -0.376 | 0.183  | 0.0152 |
| RP11-90E9.1 | 0.055  | -0.27  | 0.231  | -0.617 | -0.226 | 0.0152 |
| FGD1        | -0.157 | -0.226 | -0.369 | -0.247 | -0.26  | 0.0152 |
| NDUFB2      | -0.273 | -0.209 | -0.149 | -0.327 | -0.345 | 0.0153 |
| LINC00294   | 0.226  | 0.241  | 0.33   | 0.219  | 0.399  | 0.0154 |
| TRMT61B     | -0.351 | -0.115 | -0.036 | -0.185 | -0.188 | 0.0155 |
| RP1-281H8.3 | 0.02   | -0.058 | -0.174 | -0.429 | -0.607 | 0.0155 |
| AC004049.3  | 0.247  | 0.026  | 0.002  | 0.431  | 0.263  | 0.0156 |
| FAM92A1     | -0.15  | -0.152 | -0.161 | -0.452 | -0.172 | 0.0156 |
| AC009303.2  | 0.51   | 0.203  | 0.026  | 0.165  | -0.409 | 0.0156 |
| FIRRE       | -0.417 | -0.098 | -0.083 | -0.661 | -0.471 | 0.0156 |
| RP11-783K1  | -0.448 | -0.127 | 0.058  | -0.095 | 0.226  | 0.0157 |
| MIR4512     | -0.409 | -0.458 | -0.067 | -0.337 | -0.756 | 0.0157 |
| RP4-682C21  | 0.378  | 0.078  | 0.025  | 0.292  | 0.244  | 0.0158 |
| RPS16       | -0.215 | -0.157 | -0.066 | -0.34  | -0.311 | 0.0158 |
| RP3-469D22  | -0.106 | -0.143 | -0.139 | -0.157 | -0.444 | 0.0159 |
| RP11-151N1  | -0.422 | 0.024  | 0.197  | -0.729 | -0.354 | 0.016  |
| MAGED1      | 0.409  | 0.157  | -0.019 | 0.329  | 0.201  | 0.0161 |
| ZNF771      | -0.426 | -0.237 | -0.184 | -0.309 | 0.166  | 0.0161 |
| RP11-597G2  | 0.04   | -0.176 | -0.33  | -0.002 | -0.895 | 0.0161 |
| SNX6P1      | -0.172 | -0.342 | -0.143 | -0.114 | 0.008  | 0.0162 |
| RP11-528A1  | 0.1    | -0.437 | -0.328 | 0.081  | -0.497 | 0.0162 |
| RP11-260M2  | -0.372 | -0.189 | 0.356  | -0.544 | -0.508 | 0.0162 |
| CALCOCO2    | 0.203  | 0.143  | 0.126  | 0.342  | -0.002 | 0.0163 |
| CTD-3131K8  | -0.288 | -0.082 | 0.165  | -0.598 | 0.15   | 0.0164 |
| TMSB4X      | -0.283 | -0.214 | -0.066 | -0.388 | 0.085  | 0.0164 |
| RP13-128O4  | -0.272 | -0.093 | -0.482 | -0.553 | -0.884 | 0.0164 |
| CTA-293F17  | -0.474 | 0.119  | 0.337  | 0.261  | 0.523  | 0.0165 |
| AF131215.9  | -0.21  | 0.002  | 0.386  | -0.16  | 0.271  | 0.0165 |
| RP11-14K2.1 | -0.291 | -0.233 | -0.125 | -0.419 | -0.327 | 0.0165 |
| SNORA2A     | -0.189 | -0.441 | -0.01  | -0.63  | -0.852 | 0.0165 |
| SNORD11     | -0.127 | -0.279 | -0.375 | -0.69  | -0.865 | 0.0165 |
| SEC61A2     | -0.203 | -0.054 | -0.11  | -0.517 | -0.35  | 0.0166 |
| ROMO1       | -0.437 | -0.296 | -0.109 | -0.427 | -0.385 | 0.0166 |

|              |        |        |        |        |        |        |
|--------------|--------|--------|--------|--------|--------|--------|
| SLC39A11     | 0.149  | -0.123 | -0.351 | 0.146  | 0.111  | 0.0167 |
| LBH          | 0.853  | 0.35   | 0.043  | 0.225  | 0.525  | 0.0168 |
| RP11-118N2   | 0.346  | -0.063 | 0.034  | 0.235  | 0.239  | 0.017  |
| CTA-217C2.1  | -0.512 | -0.076 | 0.224  | -0.663 | -0.543 | 0.017  |
| TBC1D8B      | 0.413  | 0.313  | 0.133  | 0.323  | 0.171  | 0.0172 |
| SF3A3P2      | 0.318  | -0.002 | 0.09   | 0.421  | 0.12   | 0.0172 |
| MIR3682      | 0.361  | 0.03   | 0.187  | -0.68  | -0.092 | 0.0172 |
| TIGD5        | -0.26  | -0.297 | -0.226 | -0.367 | -0.049 | 0.0174 |
| RP11-443G1   | -0.329 | -0.306 | -0.128 | -0.402 | -0.457 | 0.0174 |
| RP11-201K1   | -0.318 | -0.147 | 0.036  | -0.425 | -0.592 | 0.0174 |
| CYP2U1       | 0.338  | 0.19   | 0.09   | 0.179  | 0.204  | 0.0175 |
| TSPYL3       | 0.105  | -0.174 | -0.242 | -0.176 | 0.386  | 0.0176 |
| AP2A1        | 0.255  | 0.132  | 0.044  | 0.364  | 0.198  | 0.0176 |
| HIST1H4H     | 0.05   | 0.715  | 0.708  | 0.625  | 0.632  | 0.0177 |
| RP11-333E1   | 0.304  | -0.038 | 0.007  | 0.287  | 0.329  | 0.0177 |
| ARID1A       | 0.335  | 0.093  | 0.018  | 0.087  | 0.087  | 0.0177 |
| ZDHHC11      | -0.573 | 0.011  | 0.217  | -0.274 | -0.53  | 0.0177 |
| RP11-385M4   | 0.601  | -0.131 | -0.151 | 0.252  | 0.583  | 0.0178 |
| APOLD1       | -0.643 | -0.147 | -0.197 | -0.166 | -0.004 | 0.0178 |
| RP11-460N2   | -0.712 | -0.186 | -0.305 | -0.856 | -0.7   | 0.0178 |
| TBC1D3F      | -0.576 | -0.45  | 0.015  | -0.644 | 0.023  | 0.0179 |
| RP1-30G7.2   | -0.627 | -0.255 | 0.269  | -0.32  | -0.208 | 0.0179 |
| RP4-669L17.1 | -0.172 | -0.056 | 0.272  | -0.718 | -0.259 | 0.0179 |
| RP11-535M1   | 0.284  | -0.146 | 0.058  | 0.484  | 0.751  | 0.0182 |
| KCNJ2-AS1    | 0.122  | 0.532  | 0.713  | 0.552  | 0.281  | 0.0182 |
| SNORD62B     | -0.205 | 0.023  | 0.189  | -0.798 | -0.265 | 0.0182 |
| RP3-475B7.3  | 0.497  | 0.065  | 0.08   | 0.3    | 0.308  | 0.0183 |
| RP11-81N13   | -0.238 | -0.143 | -0.014 | 0.129  | 0.467  | 0.0184 |
| ZNF594       | -0.112 | 0.363  | 0.487  | 0.178  | 0.339  | 0.0184 |
| MTX1         | 0.397  | 0.39   | 0.049  | 0.405  | 0.109  | 0.0184 |
| RP3-497J21.1 | -0.233 | -0.419 | -0.331 | -0.099 | -0.129 | 0.0184 |
| AC093724.2   | 0.13   | -0.018 | -0.351 | -0.082 | -0.327 | 0.0184 |
| CTD-2286N8   | 0.452  | 0.231  | -0.107 | -0.269 | -0.363 | 0.0184 |
| SNRPGP2      | -0.3   | -0.096 | -0.092 | -0.544 | -0.688 | 0.0184 |
| TGFB3        | -0.401 | 0.054  | 0.126  | -0.403 | 0.194  | 0.0185 |
| AC011742.3   | -0.421 | -0.732 | -0.418 | -0.388 | -1.022 | 0.0185 |
| RP3-499B10   | -0.288 | 0.282  | 0.202  | -0.425 | -0.604 | 0.0186 |
| RP11-175B9   | -0.194 | -0.321 | -0.157 | -0.473 | -0.344 | 0.0187 |

|             |        |        |        |        |        |        |
|-------------|--------|--------|--------|--------|--------|--------|
| CRP         | -0.527 | -0.526 | -0.481 | -0.341 | -1.002 | 0.0187 |
| SNRNP200    | 0.259  | 0.13   | 0.138  | 0.398  | 0.34   | 0.0188 |
| RP11-390B4  | 0.065  | 0.071  | -0.243 | -0.02  | -0.701 | 0.0188 |
| ZNF570      | 0.305  | 0.458  | 0.184  | 0.061  | 0.416  | 0.0189 |
| PDCD2L      | -0.215 | -0.255 | -0.248 | -0.01  | -0.362 | 0.0189 |
| ATP5E       | -0.403 | -0.176 | -0.07  | -0.595 | -0.48  | 0.0189 |
| CYB5A       | -0.169 | 0.053  | 0.121  | -0.083 | -0.497 | 0.0189 |
| AC006273.4  | -0.236 | 0.041  | 0.175  | 0.013  | -0.61  | 0.0189 |
| LINC00997   | 0.151  | -0.116 | -0.011 | -0.036 | 0.597  | 0.019  |
| RP11-668N2  | 0.119  | -0.155 | 0.054  | -0.012 | 0.412  | 0.019  |
| ZNF671      | -0.102 | 0.331  | 0.151  | -0.119 | -0.065 | 0.019  |
| NCRNA0011   | -0.185 | 0.282  | 0.241  | -0.614 | -0.155 | 0.019  |
| CTD-2301A4  | 0.058  | -0.34  | -0.337 | -0.143 | -0.207 | 0.019  |
| RP11-1023L  | -0.258 | -0.092 | 0.26   | -0.414 | -0.47  | 0.019  |
| RPS27       | -0.091 | -0.161 | 0.047  | -0.343 | -0.451 | 0.0191 |
| ZNF34       | -0.084 | 0.174  | -0.181 | -0.307 | -0.456 | 0.0191 |
| USMG5P1     | -0.439 | -0.258 | -0.076 | -0.696 | -0.561 | 0.0191 |
| AC018641.6  | 0.179  | -0.123 | 0.05   | 0.373  | 0.207  | 0.0192 |
| IFI27L1     | -0.388 | -0.112 | -0.085 | -0.3   | -0.314 | 0.0192 |
| RP3-467L1.6 | -0.36  | -0.085 | -0.132 | -0.804 | -0.572 | 0.0192 |
| AC017104.3  | -0.206 | -0.221 | -0.179 | -0.234 | -0.598 | 0.0192 |
| SH3GL1P1    | 0.257  | -0.003 | 0.248  | -0.376 | -0.034 | 0.0193 |
| RP11-81P15  | 0.185  | -0.316 | -0.351 | -0.142 | -0.338 | 0.0193 |
| RP11-752G1  | 0.148  | -0.338 | -0.38  | -0.284 | 0.024  | 0.0194 |
| SNORD53B    | -0.054 | 0.216  | 0.229  | -0.476 | -0.375 | 0.0194 |
| RP11-587D2  | -0.323 | -0.218 | -0.049 | -0.618 | -0.395 | 0.0194 |
| TCEB1P2     | -0.19  | 0.119  | -0.039 | -0.16  | -0.522 | 0.0195 |
| PTGR2       | -0.212 | -0.025 | 0.339  | 0.091  | 0.31   | 0.0196 |
| CTB-30L5.1  | -0.338 | 0.437  | 0.538  | 0.457  | -0.046 | 0.0196 |
| RP11-760D2  | -0.094 | -0.434 | -0.332 | -0.267 | -0.161 | 0.0196 |
| CTD-2184D3  | -0.308 | -0.125 | 0.105  | -0.485 | -0.464 | 0.0196 |
| YAE1D1      | -0.38  | -0.233 | -0.149 | -0.365 | -0.038 | 0.0197 |
| TIGD7       | -0.257 | 0.067  | 0.102  | -0.001 | -0.342 | 0.0197 |
| RP5-857K21  | -0.438 | -0.22  | -0.201 | -1.014 | -0.453 | 0.0197 |
| ATP5EP2     | -0.448 | -0.274 | -0.141 | -0.594 | -0.527 | 0.0197 |
| RP11-388M2  | 0.127  | -0.111 | 0.076  | 0.07   | 0.617  | 0.0198 |
| CTD-2265D6  | 0.223  | -0.166 | 0.013  | 0.401  | 0.099  | 0.0198 |
| OSBP        | 0.327  | 0.201  | 0.135  | 0.353  | 0.269  | 0.0199 |

|              |        |        |        |        |        |        |
|--------------|--------|--------|--------|--------|--------|--------|
| AC106862.1   | 0.547  | 0.542  | 0.018  | -0.147 | -0.051 | 0.0199 |
| CMB9-94B1.   | 0.03   | -0.136 | 0.169  | -0.766 | -0.402 | 0.02   |
| DDX18P1      | 0.329  | 0.322  | 0.189  | 0.609  | -0.04  | 0.0201 |
| RP11-1017G   | -0.628 | 0.126  | -0.133 | -0.294 | -0.581 | 0.0202 |
| SLX1A-SUL1   | -0.658 | -0.304 | 0.05   | -0.553 | -0.608 | 0.0203 |
| AC007277.2   | 0.312  | 0.119  | -0.039 | 0.54   | 0.186  | 0.0205 |
| SNRPD2       | -0.238 | -0.186 | -0.083 | -0.362 | -0.386 | 0.0205 |
| RP11-767N6   | -0.479 | -0.008 | -0.001 | -0.828 | -0.448 | 0.0205 |
| NDUFA4       | -0.358 | -0.114 | -0.043 | -0.564 | -0.498 | 0.0205 |
| C19orf79     | -0.277 | -0.186 | -0.125 | -0.473 | -0.479 | 0.0206 |
| MIR1254-1    | -0.312 | 0.074  | 0.198  | -0.491 | -0.598 | 0.0209 |
| RPS11        | -0.262 | -0.146 | -0.035 | -0.395 | -0.215 | 0.021  |
| UBL5         | -0.278 | -0.216 | -0.121 | -0.429 | -0.356 | 0.021  |
| CCDC121      | -0.703 | -0.169 | -0.081 | -0.223 | -0.481 | 0.021  |
| CTR9         | 0.259  | 0.235  | 0.163  | 0.433  | 0.284  | 0.0211 |
| RP4-604A21   | -0.258 | -0.163 | -0.17  | -0.621 | -0.472 | 0.0211 |
| AF011889.4   | -0.536 | 0.016  | 0.158  | -0.584 | 0.093  | 0.0212 |
| MFSD14C      | 0.108  | 0.186  | 0.234  | -0.349 | -0.024 | 0.0213 |
| SEMA4F       | 0.016  | 0.219  | 0.347  | 0.305  | 0.358  | 0.0214 |
| RP11-388G3   | 0.466  | 0.179  | -0.087 | -0.163 | 0.226  | 0.0214 |
| NGEF         | 0.43   | 0.135  | 0.059  | 0.155  | -0.332 | 0.0214 |
| RP4-798C17   | 0.53   | 0.262  | 0.233  | 0.128  | -0.466 | 0.0214 |
| AC011330.5   | -0.35  | -0.454 | -0.127 | -0.346 | -0.592 | 0.0214 |
| RP1-167A19   | 0.308  | -0.099 | 0.227  | 0.487  | 0.098  | 0.0215 |
| CH17-260O1   | 0.022  | -0.421 | -0.067 | -0.646 | -0.29  | 0.0215 |
| TOMM6        | -0.007 | -0.134 | -0.044 | -0.203 | -0.331 | 0.0216 |
| CBWD3        | 0.098  | 0.063  | 0.735  | -0.229 | -0.182 | 0.0217 |
| RPL31        | -0.226 | -0.165 | -0.031 | -0.422 | -0.268 | 0.0217 |
| AC002066.1   | -0.031 | -0.094 | 0.4    | 0.284  | 0.825  | 0.0218 |
| GART         | 0.256  | 0.078  | 0.076  | 0.334  | 0.224  | 0.0218 |
| RP11-864N7   | -0.418 | -0.275 | -0.106 | -0.602 | -0.499 | 0.0218 |
| UNC45A       | 0.151  | 0.089  | 0.026  | 0.347  | 0.2    | 0.0219 |
| ZBTB26       | -0.296 | -0.127 | -0.069 | -0.278 | -0.421 | 0.0219 |
| RP13-516M1   | -0.464 | -0.012 | 0.171  | -0.059 | -0.438 | 0.0219 |
| RP11-12124.1 | 0.363  | 0.063  | -0.22  | 0.342  | 0.238  | 0.0221 |
| RP4-614C10   | -0.383 | -0.132 | 0.063  | -0.056 | -0.055 | 0.0221 |
| RP11-46C24   | -0.102 | 0.419  | 0.365  | 0.148  | -0.115 | 0.0221 |
| RP13-122B2   | -0.187 | -0.095 | 0.361  | -0.197 | -0.319 | 0.0221 |



|             |        |        |        |        |        |        |
|-------------|--------|--------|--------|--------|--------|--------|
| SNORD23     | 0.051  | 0.101  | -0.258 | -0.699 | -0.586 | 0.0221 |
| ACTG1P9     | 0.178  | -0.183 | -0.545 | -0.108 | -0.198 | 0.0223 |
| RP13-942N8  | -0.728 | -0.145 | 0.108  | -0.308 | -0.447 | 0.0223 |
| RP11-734K2  | -0.34  | -0.524 | -0.19  | -0.603 | -0.483 | 0.0223 |
| AC064836.3  | -0.274 | -0.859 | -0.597 | -0.019 | -0.572 | 0.0223 |
| ITPRIPL2    | 0.084  | 0.029  | 0.159  | 0.03   | 0.324  | 0.0224 |
| RP11-315O1  | 0.497  | -0.404 | 0.205  | 0.128  | -0.013 | 0.0224 |
| RP11-102M1  | 0.14   | -0.06  | -0.032 | 0.331  | 0.089  | 0.0226 |
| MIR6516     | -0.016 | 0.295  | 0.284  | -0.536 | -0.409 | 0.0226 |
| RAET1G      | 0.19   | -0.045 | -0.258 | -0.097 | -0.726 | 0.0226 |
| HSD11B1L    | -0.267 | -0.017 | 0.004  | -0.446 | 0.217  | 0.0227 |
| AC019097.7  | 0.344  | -0.08  | -0.214 | 0.059  | -0.09  | 0.0227 |
| ZNF285      | -0.581 | -0.062 | 0.012  | -0.107 | -0.217 | 0.0228 |
| AC027763.2  | -0.127 | 0.037  | 0.117  | -0.305 | -0.403 | 0.0228 |
| RPS10P3     | -0.279 | -0.339 | -0.252 | -0.581 | -0.346 | 0.0229 |
| RP11-481J2. | 0.33   | 0.058  | 0.445  | 0.173  | -0.518 | 0.0229 |
| FCRLB       | 0.152  | -0.313 | -0.353 | -0.105 | -0.722 | 0.0229 |
| PKD1P5      | -0.383 | -0.143 | -0.158 | -0.49  | -0.302 | 0.023  |
| GKAP1       | -0.343 | 0.326  | 0.387  | -0.104 | 0.3    | 0.0232 |
| ARL17A      | -0.398 | -0.254 | 0.211  | -0.351 | -0.332 | 0.0232 |
| SDHAF4      | -0.325 | 0.009  | 0.25   | -0.058 | -0.16  | 0.0233 |
| DUXAP9      | 0.153  | 0.078  | -0.026 | -0.107 | -0.769 | 0.0234 |
| RNA5-8SN4   | 0.023  | 0.491  | -0.063 | -0.414 | -0.449 | 0.0235 |
| OCLM        | -0.418 | -0.167 | -0.362 | -0.883 | -0.69  | 0.0235 |
| SCARNA21    | -0.647 | -0.304 | -0.36  | -0.806 | -0.884 | 0.0236 |
| RP11-182J1. | -0.243 | -0.062 | 0.421  | -0.301 | 0.255  | 0.0237 |
| PRORS1P     | -0.384 | 0.031  | -0.12  | -0.473 | -0.758 | 0.0237 |
| GATSL2      | 0.205  | 0.189  | 0.19   | 0.355  | 0.581  | 0.0238 |
| TEAD3       | 0.582  | 0.422  | 0.337  | -0.084 | 0.015  | 0.0238 |
| RP1-90J20.7 | -0.78  | -0.292 | -0.027 | -0.286 | -0.199 | 0.0239 |
| SPATA25     | -0.311 | 0.452  | 0.353  | -0.245 | -0.247 | 0.0239 |
| AC112211.2  | 0.121  | -0.367 | -0.515 | 0.018  | 0.061  | 0.024  |
| RP11-621H8  | 0.054  | -0.402 | -0.164 | -0.138 | -0.419 | 0.024  |
| RP11-123J14 | -0.212 | -0.196 | 0.053  | -0.278 | -0.439 | 0.0241 |
| C17orf67    | -0.555 | -0.113 | 0.068  | -0.241 | -0.089 | 0.0242 |
| AC131097.3  | -0.143 | 0.093  | 0.22   | -0.671 | -0.479 | 0.0242 |
| UBE4B       | 0.216  | 0.17   | 0.158  | 0.365  | 0.226  | 0.0243 |
| RP11-214K3  | 0.254  | -0.214 | -0.016 | -0.644 | -0.289 | 0.0243 |

|             |        |        |        |        |        |        |
|-------------|--------|--------|--------|--------|--------|--------|
| WBSCR27     | -0.387 | 0.114  | 0.378  | 0.273  | 0.499  | 0.0244 |
| RP11-511P7  | -0.713 | -0.451 | -0.127 | -0.623 | -0.058 | 0.0244 |
| RP11-109G1  | -0.417 | -0.164 | -0.211 | -0.793 | -0.687 | 0.0244 |
| SLC2A11     | -0.368 | 0.014  | 0.144  | -0.311 | -0.025 | 0.0245 |
| SLX1B-SUL1  | -0.138 | 0.229  | 0.054  | -0.735 | -0.376 | 0.0245 |
| EEF1B2      | -0.185 | -0.161 | -0.083 | -0.36  | -0.402 | 0.0245 |
| RNA5SP82    | -0.543 | -0.037 | -0.382 | -0.914 | -0.514 | 0.0245 |
| AC092610.1  | -0.453 | -0.446 | -0.252 | -0.422 | -0.528 | 0.0246 |
| RPL23AP53   | 0.052  | 0.434  | 0.196  | -0.055 | 0.357  | 0.0247 |
| RP5-995J12. | -0.647 | -0.554 | -0.264 | 0.135  | -0.337 | 0.0249 |
| RP11-381O6  | -0.013 | 0.428  | -0.061 | -0.535 | -0.429 | 0.0249 |
| PPIL1P1     | -0.059 | -0.55  | -0.2   | -0.1   | -0.647 | 0.0249 |
| RP11-69E11  | -0.08  | -0.265 | -0.268 | 0.432  | 0.271  | 0.0251 |
| SWSAP1      | -0.013 | -0.01  | -0.024 | 0.254  | -0.39  | 0.0253 |
| LITAF       | 0.616  | 0.473  | 0.359  | 0.375  | 0.312  | 0.0254 |
| ADAMTS10    | -0.35  | 0.096  | 0.092  | -0.502 | 0.197  | 0.0255 |
| ZNF737      | 0.619  | 0.816  | 0.678  | 0.719  | 0.849  | 0.0256 |
| S100A4      | -0.335 | -0.355 | 0.044  | -0.039 | 0.527  | 0.0258 |
| RP11-638I2. | -0.349 | -0.234 | -0.078 | -0.559 | -0.497 | 0.0258 |
| FHOD3       | -0.079 | -0.125 | -0.483 | -0.293 | 0.18   | 0.0259 |
| CTD-2089O2  | 0.493  | -0.138 | 0.007  | 0.264  | -0.195 | 0.0259 |
| MAFG-AS1    | -0.557 | -0.115 | -0.054 | 0.036  | -0.46  | 0.0259 |
| RP4-545C24  | -0.211 | 0.021  | -0.04  | -0.32  | -0.513 | 0.0259 |
| PYROXD2     | -0.102 | -0.039 | 0.427  | -0.105 | 0.434  | 0.026  |
| MRPL33      | -0.336 | -0.005 | 0.138  | -0.314 | -0.171 | 0.026  |
| MORN1       | -0.534 | -0.111 | 0.216  | -0.432 | -0.175 | 0.026  |
| AC005795.2  | 0.298  | 0.055  | -0.196 | -0.069 | -0.329 | 0.026  |
| RN7SL608P   | -0.222 | -0.139 | 0.212  | -0.743 | -0.378 | 0.026  |
| KIAA1161    | 0.156  | 0.079  | -0.05  | 0.162  | 0.323  | 0.0263 |
| MFAP1       | 0.286  | 0.265  | 0.047  | 0.372  | 0.204  | 0.0264 |
| RPL31P49    | -0.311 | -0.309 | -0.078 | -0.507 | -0.331 | 0.0264 |
| RP11-128A6  | 0.394  | -0.002 | -0.068 | 0.106  | 0.095  | 0.0265 |
| RP11-320L1: | -0.156 | -0.171 | -0.037 | -0.337 | -0.271 | 0.0266 |
| RP5-1056L3. | -0.319 | -0.364 | -0.182 | -0.5   | -0.349 | 0.0266 |
| TASP1       | -0.124 | -0.002 | 0.052  | 0.111  | -0.33  | 0.0269 |
| RPL37AP8    | -0.541 | -0.461 | -0.156 | -0.534 | -0.55  | 0.027  |
| MIR7161     | 0.085  | 0.166  | 0.171  | -0.061 | -0.705 | 0.027  |
| RP11-446N1  | -0.274 | -0.057 | -0.124 | -0.654 | -0.846 | 0.0271 |

|            |        |        |        |        |        |        |
|------------|--------|--------|--------|--------|--------|--------|
| FDPSP4     | 0.465  | -0.246 | -0.149 | 0.254  | 0.179  | 0.0272 |
| SNORA28    | 0.155  | 0.337  | 0.175  | -0.369 | -0.396 | 0.0272 |
| RPS3AP5    | -0.277 | -0.037 | 0.105  | -0.463 | -0.381 | 0.0274 |
| RP11-51B10 | -0.69  | -0.661 | -0.599 | -0.901 | -0.94  | 0.0274 |
| RP11-12M9  | 0.363  | -0.073 | -0.145 | 0.24   | -0.02  | 0.0275 |
| RP11-804L2 | 0.093  | -0.53  | -0.217 | -0.272 | -0.461 | 0.0275 |
| DHFRL1     | 0.082  | 0.212  | 0.198  | 0.4    | 0.398  | 0.0276 |
| RP11-45P22 | 0.377  | 0.183  | -0.114 | 0.407  | 0.368  | 0.0276 |
| CYP27B1    | 0.074  | 0.192  | 0.136  | -0.526 | -0.131 | 0.0277 |
| RP11-459A1 | -0.105 | -0.352 | -0.174 | -0.281 | -0.337 | 0.0277 |
| BCL2L7P1   | 0.209  | 0.205  | 0.304  | 0.398  | 0.27   | 0.0281 |
| RP11-363H1 | 0.104  | -0.522 | -0.093 | 0.263  | -0.385 | 0.0281 |
| NDUFA11    | -0.254 | -0.153 | -0.183 | -0.318 | -0.327 | 0.0282 |
| AMMECR1    | 0.113  | 0.289  | 0.195  | 0.359  | 0.226  | 0.0283 |
| RP11-373A9 | -0.231 | -0.241 | -0.129 | -0.468 | -0.422 | 0.0283 |
| SNORA20    | -0.082 | -0.088 | -0.257 | -0.524 | -0.885 | 0.0285 |
| RP11-199F1 | -0.136 | -0.207 | -0.267 | -0.871 | -0.487 | 0.0288 |
| RP11-36C20 | -0.268 | -0.265 | -0.047 | -0.431 | -0.368 | 0.0289 |
| RP1-131H7  | 0.192  | -0.312 | -0.524 | -0.072 | 0.015  | 0.029  |
| ZSCAN9     | -0.231 | -0.201 | 0.024  | -0.401 | -0.048 | 0.029  |
| RP11-85F14 | -0.058 | -0.147 | -0.338 | -0.501 | -0.837 | 0.029  |
| TMEM8B     | -0.097 | 0.421  | 0.375  | 0.234  | 0.093  | 0.0291 |
| RP11-171I2 | -0.305 | 0.504  | 0.193  | -0.367 | 0.012  | 0.0291 |
| MIRLET7D   | -0.49  | -0.002 | -0.234 | -0.85  | -0.542 | 0.0292 |
| MRPL10     | 0.066  | 0.143  | 0.099  | 0.326  | 0.183  | 0.0293 |
| TRMT11     | -0.081 | 0.046  | -0.066 | -0.296 | -0.347 | 0.0293 |
| SNORD84    | -0.218 | 0.057  | -0.117 | -0.728 | -0.456 | 0.0293 |
| MIR210HG   | -0.212 | 0.16   | -0.052 | -0.464 | -0.535 | 0.0293 |
| RABL2A     | -0.628 | 0.011  | 0.18   | -0.178 | 0.096  | 0.0295 |
| RP3-467N11 | 0.547  | 0.239  | 0.168  | 0.37   | 0      | 0.0295 |
| ACTG1P1    | 0.261  | -0.208 | -0.276 | -0.206 | -0.377 | 0.0295 |
| RP11-692C2 | 0.169  | -0.194 | -0.072 | 0.376  | 0.403  | 0.0297 |
| RP11-299L1 | -0.01  | -0.358 | -0.167 | -0.912 | -0.33  | 0.0297 |
| RP11-108M9 | -0.244 | -0.085 | 0.128  | -0.118 | -0.586 | 0.0297 |
| LAGE3      | -0.268 | -0.17  | -0.179 | -0.317 | -0.374 | 0.0298 |
| RP11-421P1 | -0.694 | -0.436 | -0.096 | -0.513 | -0.53  | 0.0298 |
| RP11-242D8 | -0.574 | -0.007 | 0.311  | -0.456 | -0.365 | 0.0299 |
| RP11-597D1 | -0.047 | 0.191  | 0.428  | -0.058 | 0.512  | 0.0302 |

|             |        |        |        |        |        |        |
|-------------|--------|--------|--------|--------|--------|--------|
| PRPF8       | 0.317  | 0.165  | 0.079  | 0.422  | 0.288  | 0.0302 |
| RPS12       | -0.35  | -0.148 | 0.007  | -0.52  | -0.43  | 0.0303 |
| RP13-204A1  | -0.446 | -0.242 | -0.077 | -0.298 | -0.282 | 0.0308 |
| RP11-777B9  | 0.199  | -0.512 | -0.613 | -0.503 | -0.438 | 0.0308 |
| CTD-2066L2  | -0.162 | -0.195 | -0.122 | -0.142 | 0.609  | 0.0309 |
| HNRNPUL2-   | 0.395  | 0.069  | 0.06   | 0.384  | 0.541  | 0.031  |
| RP11-304F1  | 0.087  | -0.331 | -0.338 | -0.032 | -0.348 | 0.031  |
| RP11-434I12 | -0.151 | -0.374 | -0.193 | -0.028 | 0.259  | 0.0311 |
| RP11-274H2  | -0.466 | 0.09   | 0.233  | -0.191 | 0.449  | 0.0312 |
| FKBP9L      | 0.22   | 0.009  | -0.182 | 0.555  | 0.275  | 0.0313 |
| C14orf2     | -0.237 | -0.094 | -0.036 | -0.372 | -0.365 | 0.0314 |
| PRAF2       | 0.04   | 0.066  | 0.033  | 0.195  | 0.348  | 0.0315 |
| ANKEF1      | 0.026  | 0.188  | 0.304  | 0.504  | 0.346  | 0.0316 |
| MIR637      | -0.266 | 0.218  | 0.182  | -0.598 | -0.146 | 0.0316 |
| RP11-168J1  | -0.056 | -0.354 | -0.197 | -0.089 | 0.16   | 0.0318 |
| RP11-12G12  | -0.387 | -0.047 | -0.025 | -0.001 | -0.365 | 0.0318 |
| RNU4-82P    | -0.483 | -0.001 | -0.032 | -0.528 | -0.6   | 0.0318 |
| BHLHA15     | 0.302  | -0.145 | -0.05  | 0.037  | -0.721 | 0.0318 |
| AC104113.2  | -0.348 | -0.498 | -0.363 | -0.499 | -0.794 | 0.0318 |
| AF038458.4  | -0.259 | -0.052 | -0.148 | -0.117 | -0.808 | 0.0321 |
| KB-68A7.1   | 0.163  | 0.187  | 0.814  | 0.43   | -0.13  | 0.0322 |
| C10orf37    | -0.377 | -0.264 | -0.276 | -0.181 | -0.67  | 0.0322 |
| RP4-701O16  | -0.27  | -0.375 | -0.157 | -0.258 | -0.328 | 0.0323 |
| U2AF1L4     | -0.252 | 0.111  | 0.03   | -0.578 | -0.391 | 0.0323 |
| GOLGA8T     | -0.104 | 0.129  | 0.353  | -0.459 | -0.254 | 0.0324 |
| AOC2        | -0.195 | 0.066  | 0.355  | -0.364 | -0.184 | 0.0325 |
| RNU1-103P   | 0.38   | -0.149 | 0.019  | -0.595 | -0.356 | 0.0325 |
| RP11-813I2C | 0.106  | 0.416  | -0.116 | 0.194  | 0.741  | 0.0326 |
| PDF         | -0.36  | -0.152 | -0.096 | -0.109 | 0.275  | 0.0326 |
| SNORD18C    | -0.28  | 0.124  | -0.12  | -0.583 | -0.73  | 0.0326 |
| RP11-412D9  | -0.751 | -0.165 | -0.29  | -0.497 | -0.672 | 0.0327 |
| SNORA68     | -0.242 | 0.067  | -0.2   | -0.559 | -0.765 | 0.0327 |
| RP11-442A1  | -0.269 | -0.216 | -0.331 | 0.047  | 0.472  | 0.0328 |
| ZNF695      | -0.49  | -0.312 | -0.781 | -0.509 | -0.593 | 0.0328 |
| RP11-467J1  | 0.281  | -0.001 | -0.15  | 0.346  | 0.144  | 0.033  |
| SFR1        | -0.213 | -0.118 | -0.024 | -0.249 | -0.435 | 0.033  |
| RP11-334C1  | -0.207 | -0.017 | 0.083  | -0.789 | -0.309 | 0.0331 |
| RP11-403F2  | 0.017  | -0.202 | -0.261 | -0.003 | -0.605 | 0.0331 |

|             |        |        |        |        |        |        |
|-------------|--------|--------|--------|--------|--------|--------|
| RP11-498C9  | -0.05  | 0.31   | 0.023  | -0.397 | -0.24  | 0.0333 |
| MIR6775     | 0.028  | 0.246  | 0.667  | -0.062 | -0.122 | 0.0334 |
| RP11-175M2  | 0.049  | -0.09  | 0.007  | 0.028  | -0.381 | 0.0334 |
| AC067950.1  | -0.431 | -0.022 | 0.019  | -0.42  | -0.464 | 0.0334 |
| RP11-817O1  | -0.193 | 0.508  | 0.174  | 0.285  | -0.028 | 0.0335 |
| GNG10       | -0.145 | -0.155 | -0.116 | -0.479 | -0.371 | 0.0335 |
| CENPC2      | 0.241  | -0.012 | -0.072 | -0.155 | -0.354 | 0.0337 |
| ZNF197      | 0.243  | 0.365  | 0.266  | 0.215  | 0.139  | 0.0338 |
| SC22CB-1E7  | -0.293 | -0.267 | -0.062 | -0.378 | -0.393 | 0.0339 |
| RP11-236B1  | 0.144  | -0.24  | -0.047 | 0.329  | -0.331 | 0.0341 |
| RF01159     | -0.141 | -0.291 | 0.212  | -0.498 | -0.513 | 0.0342 |
| RP11-242D8  | -0.889 | -0.366 | -0.13  | -0.491 | -0.658 | 0.0342 |
| RP11-263K1  | -0.324 | -0.465 | -0.119 | -0.247 | -0.098 | 0.0343 |
| RP11-332E4  | -0.268 | -0.761 | -0.833 | -0.638 | -0.295 | 0.0343 |
| RP5-1142A6  | -0.384 | -0.082 | -0.018 | -0.296 | -0.383 | 0.0345 |
| BEND7       | 0.211  | 0.161  | 0.258  | 0.187  | 0.461  | 0.0346 |
| AC009517.2  | -0.187 | -0.459 | -0.414 | -0.326 | -0.059 | 0.0347 |
| RP11-358M1  | -0.319 | 0.051  | 0.288  | -0.595 | -0.138 | 0.0348 |
| RP11-459O1  | 0.282  | -0.318 | -0.592 | -0.336 | -0.379 | 0.0349 |
| RP13-258O1  | -0.417 | -0.295 | -0.121 | -0.597 | -0.342 | 0.035  |
| AC023480.1  | -0.024 | -0.069 | -0.206 | -0.154 | -0.445 | 0.035  |
| RP11-736I24 | -0.899 | -0.474 | -0.286 | -0.677 | -0.643 | 0.035  |
| YBEY        | 0.117  | 0.102  | 0.182  | 0.408  | 0.313  | 0.0351 |
| RP11-490M8  | -0.369 | -0.239 | -0.104 | -0.174 | -0.212 | 0.0351 |
| EIF3C       | 0.438  | 0.171  | 0.024  | 0.503  | 0.274  | 0.0352 |
| RP5-1041C1  | -0.006 | -0.474 | -0.125 | 0.145  | 0.137  | 0.0352 |
| GOLGA8Q     | 0.041  | 0.427  | 0.461  | -0.4   | 0.296  | 0.0353 |
| AC009362.2  | -0.137 | -0.017 | 0.001  | -0.451 | -0.483 | 0.0353 |
| DNAJC30     | 0.037  | 0.057  | -0.027 | 0.34   | 0.266  | 0.0354 |
| RP11-651L5. | 0.008  | 0.226  | 0.45   | -0.276 | -0.403 | 0.0354 |
| AC018648.5  | 0.476  | -0.315 | -0.206 | -0.111 | 0      | 0.0355 |
| RP11-553K2  | -0.485 | -0.515 | 0.162  | -0.225 | -0.68  | 0.0355 |
| RP11-43F13  | -0.154 | 0.044  | -0.02  | -0.272 | -0.458 | 0.0357 |
| CTD-2589H1  | -0.727 | 0.154  | -0.079 | -0.336 | -0.498 | 0.0357 |
| RPS25       | -0.339 | -0.104 | 0.015  | -0.385 | -0.267 | 0.0358 |
| CXCL16      | 0.034  | 0.029  | -0.058 | 0.219  | 0.594  | 0.0361 |
| USP27X      | 0.451  | 0.275  | 0.033  | 0.147  | -0.087 | 0.0362 |
| RNF148      | 0.273  | 0.192  | -0.128 | -0.313 | -0.604 | 0.0362 |

|             |        |        |        |        |        |        |
|-------------|--------|--------|--------|--------|--------|--------|
| RP11-1212A  | -0.457 | -0.378 | -0.217 | -0.774 | -0.856 | 0.0362 |
| RP11-93I21. | -0.021 | -0.478 | -0.484 | 0.038  | -0.182 | 0.0363 |
| ATF5        | 0.222  | 0.297  | 0.178  | 0.22   | 0.327  | 0.0364 |
| RP9P        | -0.072 | -0.349 | -0.234 | -0.513 | -0.249 | 0.0364 |
| AC093616.3  | -0.684 | -0.494 | -0.592 | -0.981 | -0.732 | 0.0364 |
| RP11-95P2.1 | -0.219 | 0.436  | 0.488  | 0.277  | -0.247 | 0.0366 |
| PQLC2L      | -0.029 | -0.272 | -0.355 | -0.206 | -0.657 | 0.0366 |
| MAD1L1      | 0.184  | 0.052  | 0.121  | 0.469  | 0.198  | 0.0367 |
| NAGS        | -0.383 | 0.025  | 0.181  | 0.085  | -0.025 | 0.0367 |
| AC006028.1  | -0.465 | -0.237 | -0.21  | -0.725 | -0.621 | 0.0369 |
| AC133644.3  | 0.381  | -0.139 | 0.038  | 0.377  | 0.407  | 0.037  |
| SNHG5       | -0.25  | -0.03  | 0.046  | -0.474 | -0.387 | 0.037  |
| RNU6-26P    | -0.208 | -0.214 | 0.351  | -0.566 | 0.218  | 0.0371 |
| RNU6-1053F  | -0.492 | 0.064  | -0.198 | -0.744 | -0.605 | 0.0372 |
| RP3-519P24  | 0.002  | -0.586 | -0.189 | -0.534 | -0.296 | 0.0376 |
| ALG9        | -0.02  | -0.04  | 0.061  | 0.237  | -0.428 | 0.0376 |
| RP11-367G1  | -0.496 | -0.45  | -0.441 | -0.752 | -0.702 | 0.0376 |
| PRR29       | -0.191 | 0.054  | -0.041 | -0.002 | -0.812 | 0.0377 |
| AP001340.2  | -0.326 | -0.477 | -0.513 | -0.492 | 0.275  | 0.0379 |
| PHLPP1      | 0.446  | 0.139  | 0.059  | 0.246  | 0.102  | 0.038  |
| SARS2       | 0.071  | 0.018  | 0      | -0.129 | -0.395 | 0.038  |
| RP13-444K1  | -0.147 | -0.04  | 0.071  | -0.108 | -0.537 | 0.038  |
| EEF1AKMT4   | -0.008 | -0.41  | -0.378 | -0.18  | -0.538 | 0.038  |
| RP11-798M1  | -0.772 | -0.033 | -0.208 | -0.16  | -0.652 | 0.038  |
| RP11-324J3. | -0.117 | 0.219  | 0.054  | -0.085 | 0.773  | 0.0382 |
| CYP4V2      | -0.092 | -0.112 | 0.154  | -0.011 | 0.494  | 0.0382 |
| RP11-22P6.3 | -0.258 | -0.462 | -0.462 | -0.298 | -0.778 | 0.0382 |
| MIR421      | -0.541 | -0.123 | -0.134 | -0.357 | -0.64  | 0.0383 |
| RP11-374F3  | -0.052 | -0.28  | -0.218 | -0.115 | 0.358  | 0.0384 |
| AP000580.1  | -0.317 | 0.111  | 0.221  | -0.413 | 0.034  | 0.0384 |
| AC000403.4  | -0.049 | -0.333 | -0.395 | 0.1    | -0.327 | 0.0385 |
| POLA1       | 0.333  | 0.296  | 0.059  | 0.314  | -0.039 | 0.0387 |
| FN1         | 0.354  | 0.144  | -0.092 | 0.218  | -0.183 | 0.0387 |
| RP1-178F15  | -0.162 | 0.251  | 0.537  | -0.104 | -0.025 | 0.0388 |
| RP11-498J9. | 0.401  | -0.268 | -0.021 | 0.206  | 0.085  | 0.0389 |
| SNORD24     | -0.103 | 0.216  | 0.245  | -0.577 | -0.407 | 0.0389 |
| DGCR11      | -0.076 | -0.227 | -0.238 | -0.26  | -0.435 | 0.0389 |
| RP11-42D20  | -0.38  | -0.206 | -0.011 | -0.527 | -0.475 | 0.039  |

|              |        |        |        |        |        |        |
|--------------|--------|--------|--------|--------|--------|--------|
| AC115617.2   | 0.217  | -0.33  | -0.106 | 0.169  | -0.098 | 0.0391 |
| RPL39        | -0.238 | -0.08  | 0.052  | -0.406 | -0.367 | 0.0392 |
| RP11-49612.1 | 0.194  | -0.213 | -0.287 | 0.266  | 0.593  | 0.0394 |
| DGCR6        | -0.04  | 0.081  | 0.147  | -0.298 | -0.586 | 0.0397 |
| RP11-597A1   | 0.241  | -0.088 | -0.162 | 0.159  | 0.551  | 0.0398 |
| ZNF425       | 0.059  | 0.149  | 0.56   | 0.428  | 0.424  | 0.0398 |
| MIR503       | -0.901 | -0.258 | -0.26  | -0.711 | -0.407 | 0.0398 |
| ZNF137P      | -0.177 | -0.042 | 0.356  | -0.345 | -0.323 | 0.0399 |
| RP11-74E22   | -0.257 | -0.507 | -0.494 | -0.735 | -0.898 | 0.0401 |
| SMIM4        | -0.406 | -0.296 | -0.104 | -0.459 | -0.33  | 0.0402 |
| ZNF519       | 0.065  | -0.195 | -0.193 | -0.195 | -0.565 | 0.0402 |
| RP11-6N17.4  | -0.057 | -0.1   | 0.353  | -0.069 | -0.258 | 0.0403 |
| CTC-338M12   | -0.293 | -0.415 | -0.334 | -0.404 | -0.536 | 0.0403 |
| SPINT2       | -0.039 | 0.317  | 0.228  | 0.617  | 0.423  | 0.0404 |
| ERO1B        | 0.197  | 0.347  | 0.198  | -0.063 | 0.035  | 0.0404 |
| AC023485.1   | -0.127 | -0.081 | -0.161 | -0.271 | -0.489 | 0.0404 |
| FAM60CP      | 0.079  | -0.265 | 0.004  | -0.057 | 0.328  | 0.0406 |
| RP11-861E2   | -0.606 | 0.096  | 0.315  | -0.247 | -0.307 | 0.0407 |
| RP11-563H8   | -0.36  | -0.29  | -0.157 | -0.442 | -0.339 | 0.041  |
| RIMS1        | 0.094  | -0.109 | -0.135 | 0.014  | -0.389 | 0.041  |
| SLC45A4      | 0.122  | 0.196  | 0.288  | 0.352  | 0.037  | 0.0411 |
| RP1-69E11.2  | -0.419 | -0.087 | 0.289  | -0.531 | -0.198 | 0.0411 |
| NHLRC1       | -0.421 | 0.091  | 0.174  | 0.076  | 0.246  | 0.0413 |
| LL0XNC01-2   | -0.335 | -0.005 | 0.336  | -0.296 | -0.483 | 0.0414 |
| RP11-185E8   | -0.46  | -0.554 | -0.097 | -0.364 | -0.625 | 0.0415 |
| AC090516.1   | 0.414  | 0.082  | -0.264 | -0.016 | 0.001  | 0.0417 |
| RP11-791G1   | -0.288 | -0.409 | -0.211 | -0.45  | -0.366 | 0.0417 |
| AC073115.4   | 0.055  | -0.18  | -0.115 | 0.21   | -0.422 | 0.0419 |
| CTD-2302E2   | -0.199 | -0.365 | -0.066 | -0.456 | -0.247 | 0.0421 |
| RP11-390E2   | -0.346 | -0.1   | -0.418 | -0.276 | -0.568 | 0.0423 |
| RPS27A       | -0.305 | -0.061 | 0.102  | -0.449 | -0.43  | 0.0424 |
| FER1L4       | -0.369 | 0.006  | 0.058  | -0.545 | 0.062  | 0.0425 |
| RP11-16E18   | -0.483 | -0.077 | -0.349 | -0.247 | -0.902 | 0.0425 |
| RP11-53O19   | -0.544 | 0.014  | 0.15   | -0.124 | 0.024  | 0.0426 |
| RP11-177C1   | 0.106  | -0.245 | 0.216  | 0.207  | 0.611  | 0.0427 |
| RP11-92K2.2  | -0.342 | -0.155 | 0.048  | -0.501 | -0.454 | 0.0428 |
| PROCA1       | -0.615 | -0.087 | 0.022  | -0.453 | -0.556 | 0.0428 |
| SNORD55      | -0.664 | -0.389 | -0.296 | -0.927 | -0.312 | 0.0429 |

|             |        |        |        |        |        |        |
|-------------|--------|--------|--------|--------|--------|--------|
| AC040160.1  | -0.238 | -0.095 | 0.196  | 0.351  | 0.091  | 0.043  |
| RP11-68I3.4 | -0.085 | 0.148  | 0.181  | -0.524 | -0.577 | 0.043  |
| PHLDB3      | -0.091 | 0.33   | 0.273  | 0.056  | 0.036  | 0.0433 |
| RP11-592N2  | -0.257 | -0.185 | -0.125 | -0.62  | -0.223 | 0.0433 |
| MIR2116     | -0.1   | -0.275 | -0.406 | -0.681 | -0.58  | 0.0433 |
| AC007349.6  | 0.046  | -0.378 | -0.14  | -0.192 | -0.509 | 0.0434 |
| GABARAPL3   | 0.43   | 0.019  | -0.048 | 0.222  | 0.026  | 0.0435 |
| RP11-7F18.2 | -0.45  | -0.098 | -0.091 | -0.82  | -0.479 | 0.0437 |
| FBXO36      | 0.079  | -0.249 | -0.114 | -0.002 | -0.457 | 0.0439 |
| THOC7       | -0.214 | -0.123 | -0.089 | -0.431 | -0.257 | 0.0442 |
| RP11-355B1  | -0.358 | 0.183  | 0.289  | 0.45   | 0.33   | 0.0443 |
| ATF4P3      | 0.368  | 0.06   | 0.041  | 0.187  | -0.056 | 0.0445 |
| MIR4258     | -0.23  | 0.146  | 0.29   | -0.521 | -0.439 | 0.0445 |
| RP11-463C1  | 0.258  | -0.024 | 0.241  | 0.122  | 0.811  | 0.0446 |
| PSORS1C1    | -0.094 | -0.022 | 0.084  | 0.276  | 0.431  | 0.0446 |
| TVP23CP2    | 0.019  | -0.247 | -0.052 | -0.397 | -0.329 | 0.0448 |
| SNORA79B    | -0.686 | -0.351 | -0.232 | -0.8   | -0.656 | 0.0448 |
| RP11-832N8  | -0.259 | -0.229 | -0.106 | -0.317 | -0.387 | 0.0449 |
| RP11-433B3  | -0.053 | -0.19  | 0.29   | -0.13  | -0.323 | 0.045  |
| IL3RA       | 0.159  | 0.061  | -0.042 | 0.423  | 0.28   | 0.0451 |
| RP11-33B1.2 | -0.492 | -0.004 | 0.162  | -0.091 | -0.303 | 0.0451 |
| RP1-180E22  | -0.462 | -0.127 | -0.009 | -0.182 | 0.07   | 0.0452 |
| ARIH2P1     | 0.457  | 0.044  | 0.099  | 0.34   | 0.15   | 0.0455 |
| RP5-1108M1  | 0.153  | -0.438 | -0.398 | -0.162 | -0.135 | 0.0455 |
| CTD-2224J9  | -0.236 | -0.104 | -0.244 | -0.451 | -0.819 | 0.0455 |
| RP11-673E1  | -0.082 | -0.215 | -0.152 | -0.376 | -0.825 | 0.0456 |
| CTD-2314I6. | -0.285 | 0.239  | 0.439  | -0.011 | 0.076  | 0.0458 |
| PIP4K2C     | 0.216  | 0.144  | 0.06   | 0.351  | 0.212  | 0.046  |
| RNF7        | -0.161 | -0.274 | -0.278 | -0.344 | -0.113 | 0.0461 |
| ARHGAP1     | 0.332  | 0.131  | 0.092  | 0.309  | 0.275  | 0.0462 |
| PRELID2     | -0.065 | -0.225 | -0.4   | -0.252 | -0.44  | 0.0462 |
| RP11-270C1  | -0.421 | -0.22  | -0.04  | -0.554 | -0.519 | 0.0462 |
| IQGAP2      | 0.388  | 0.352  | 0.187  | 0.416  | -0.178 | 0.0463 |
| RP11-577H5  | -0.192 | -0.075 | 0.282  | 0.155  | 0.646  | 0.0464 |
| GTF2IRD2    | -0.411 | -0.308 | -0.046 | -0.366 | 0.363  | 0.0464 |
| RP1-8N8.10  | 0.351  | -0.029 | -0.063 | 0.169  | 0.118  | 0.0465 |
| ZFAND4      | -0.343 | -0.125 | -0.209 | -0.074 | -0.535 | 0.0465 |
| RBM42       | 0.201  | 0.132  | 0.01   | 0.371  | 0.2    | 0.0467 |



|              |        |        |        |        |        |        |
|--------------|--------|--------|--------|--------|--------|--------|
| NDUFB6       | -0.243 | -0.173 | 0.018  | -0.366 | -0.366 | 0.0467 |
| TMEM14B      | -0.346 | -0.073 | 0.059  | -0.259 | -0.184 | 0.0468 |
| AC011290.5   | -0.065 | -0.078 | -0.082 | -0.279 | -0.611 | 0.0472 |
| RP11-267M2   | 0.446  | 0.251  | 0.187  | 0.368  | 0.607  | 0.0473 |
| AP000254.8   | 0.202  | -0.274 | -0.445 | -0.211 | 0.43   | 0.0473 |
| RN7SL368P    | -0.529 | -0.299 | 0.41   | -0.302 | -0.14  | 0.0473 |
| TMPPE        | -0.222 | -0.108 | -0.049 | -0.227 | -0.448 | 0.0473 |
| TCEA1P       | -0.39  | -0.135 | 0.012  | -0.514 | -0.734 | 0.0474 |
| CSNK1A1P1    | 0.356  | 0.012  | -0.058 | 0      | 0.194  | 0.0475 |
| RP11-520M5   | -0.457 | -0.109 | -0.186 | 0.009  | -0.173 | 0.0476 |
| IFIT5        | 0.467  | -0.018 | 0.01   | 0.069  | 0.209  | 0.0481 |
| ANKHD1       | 0.111  | 0.182  | 0.293  | 0.385  | 0.179  | 0.0481 |
| TSTD3        | -0.269 | -0.308 | -0.503 | -0.477 | -0.479 | 0.0481 |
| ING1         | -0.273 | -0.104 | -0.186 | -0.183 | -0.347 | 0.0483 |
| AC083871.2   | 0.465  | 0.121  | 0.082  | -0.047 | -0.417 | 0.0483 |
| RP11-347H1   | 0.263  | -0.367 | -0.151 | -0.247 | -0.128 | 0.0484 |
| AC113189.5   | -0.546 | -0.494 | -0.188 | -0.36  | -0.192 | 0.0484 |
| RP11-54K16   | -0.491 | -0.589 | -0.221 | -0.42  | -0.848 | 0.0484 |
| RP4-796I17.4 | -0.303 | -0.242 | -0.204 | -0.523 | -0.416 | 0.0485 |
| RPS3P6       | -0.182 | -0.136 | -0.019 | -0.397 | -0.007 | 0.0487 |
| RP11-758P1   | -0.111 | 0.697  | 0.494  | 0.162  | -0.037 | 0.0487 |
| RP5-1112D6   | -0.664 | -0.31  | -0.117 | -0.778 | -0.581 | 0.0487 |
| CTA-963H5.4  | -0.4   | 0.142  | 0.388  | -0.155 | 0.087  | 0.049  |
| TTLL11-IT1   | 0.327  | -0.075 | 0.01   | 0.629  | 0.384  | 0.0492 |
| SEPW1P       | -0.224 | -0.351 | -0.145 | -0.409 | 0.104  | 0.0492 |
| MIR7-1       | -0.268 | 0.131  | 0.037  | -0.645 | -0.303 | 0.0493 |
| ATP5J        | -0.186 | -0.114 | -0.098 | -0.282 | -0.364 | 0.0493 |
| ZNF775       | 0.056  | 0.084  | -0.038 | 0.052  | 0.41   | 0.0494 |
| MIR635       | -0.462 | 0.005  | -0.434 | -0.762 | -0.059 | 0.0495 |
| RP11-64C12   | -0.243 | -0.243 | -0.301 | -0.562 | -0.57  | 0.0496 |
| RNU1-106P    | -0.078 | 0.445  | 0.514  | -0.265 | 0.359  | 0.0498 |
| PRX          | 0.069  | 0.342  | -0.007 | -0.049 | -0.103 | 0.0499 |
| RP11-167P1   | -0.022 | 0.106  | 0.082  | -0.555 | -0.592 | 0.0499 |

24 h

| Gene symbc | I2fc_2hr | I2fc_4hr | I2fc_6hr | I2fc_8hr | I2fc_24hr | LRT_fdr    |
|------------|----------|----------|----------|----------|-----------|------------|
| ARHGEF3    | 0.606    | 0.484    | 0.312    | 0.434    | 0.831     | 2.05E-12   |
| CDCA2      | -1.145   | -1.069   | -0.889   | -0.214   | -0.512    | 1.99E-35   |
| SAMSN1     | 0.683    | 0.067    | -0.346   | -0.106   | -0.463    | 4.35E-29   |
| TBC1D2     | 0.626    | 0.592    | 0.875    | 1.188    | 0.72      | 7.9E-25    |
| KIF2C      | -0.606   | -0.824   | -0.687   | -0.305   | -0.517    | 1.27E-22   |
| HJURP      | -1.468   | -0.936   | -1.087   | -1.073   | -1.598    | 1.79E-79   |
| RASSF2     | -0.695   | -0.323   | 0.102    | 0.015    | 0.8       | 4.22E-67   |
| PPOX       | -0.956   | -0.102   | 0.084    | -0.209   | -0.217    | 1.74E-16   |
| EXOC3L2    | 1.195    | -0.159   | -0.253   | 0.059    | -1.092    | 8.58E-25   |
| DUX4L50    | 0.717    | 1.317    | 1.246    | 0.812    | 1.544     | 0.00000118 |
| THAP3      | -0.605   | -0.194   | -0.321   | -0.343   | -0.201    | 7.28E-08   |
| PAPLN      | -0.637   | 0.344    | 0.739    | 0.154    | 0.54      | 2.45E-22   |
| FAM221A    | -0.669   | -0.028   | 0.064    | -0.513   | -0.23     | 0.000424   |
| INPP4B     | -0.789   | 0.465    | 0.148    | 0.616    | 1.703     | 6.47E-59   |
| SESN1      | 1.545    | 1.359    | 1.31     | 1.108    | 1.605     | 2.08E-155  |
| VASH1      | -0.764   | -0.66    | -0.252   | -0.849   | -0.334    | 5.85E-11   |
| ABL2       | 0.595    | 0.101    | 0.307    | 0.317    | 0.485     | 9.75E-14   |
| CLP1       | 0.588    | 0.327    | 0.211    | 0.512    | 0.296     | 4.54E-08   |
| CUZD1      | -0.656   | 0.029    | 0.347    | -0.484   | -0.182    | 0.0000771  |
| PIM3       | -0.669   | -0.045   | -0.521   | -0.716   | -0.328    | 1.16E-28   |
| SYNGAP1    | -0.965   | -0.131   | 0.19     | -0.736   | -0.913    | 2.74E-32   |
| ARHGAP32   | -0.722   | -0.114   | -0.052   | -0.355   | 0.028     | 1.94E-11   |
| FDXR       | 1.392    | 1.6      | 1.637    | 1.488    | 1.646     | 1.39E-95   |
| SLC7A2     | 0.976    | 1.278    | 0.64     | 0.136    | 0.018     | 4.29E-51   |
| LYST       | -0.789   | 0.064    | 0.201    | -0.07    | 0.22      | 3.56E-22   |
| ZSCAN16    | -0.743   | 0.015    | 0.232    | 0.246    | 0.776     | 4.35E-13   |
| FAM64A     | -0.647   | -0.906   | -0.943   | -0.436   | -0.39     | 1.02E-17   |
| SESN2      | 1.87     | 1.147    | 1.305    | 0.831    | 1.33      | 8.93E-130  |
| CCDC150    | -0.6     | -0.055   | -0.106   | -0.927   | -1.418    | 1.73E-18   |
| MIR5047    | -0.656   | 0.261    | 0.236    | -0.811   | -0.561    | 1.11E-11   |
| ZNF862     | -0.613   | 0.208    | 0.504    | -0.202   | -0.001    | 5.17E-17   |
| PABPC1L    | -0.734   | -0.317   | 0.063    | -0.99    | -0.447    | 2.35E-11   |
| LTB4R2     | -0.681   | 0.097    | 0.223    | -0.792   | -0.671    | 3.33E-15   |
| CHKB       | -0.578   | 0.184    | 0.315    | -0.544   | -0.328    | 2.63E-13   |
| HSPA1A     | -0.925   | -0.313   | -0.185   | 0.122    | 0.077     | 1.51E-10   |
| MIR3064    | -0.722   | 0.074    | 0.151    | -1.01    | -0.726    | 5.75E-13   |
| POU2F2     | -1.159   | 0.959    | 1.321    | 0.955    | 2.419     | 1.39E-175  |

|           |        |        |        |        |        |           |
|-----------|--------|--------|--------|--------|--------|-----------|
| MPZ       | -0.585 | -0.139 | -0.339 | -0.483 | 0.264  | 0.00688   |
| GTSE1     | -0.835 | -0.892 | -0.61  | -0.281 | -0.583 | 2.61E-37  |
| ZNF79     | 0.916  | 0.904  | 0.852  | 0.288  | 0.593  | 2.32E-22  |
| DTL       | 0.992  | 0.022  | -0.66  | -0.57  | -0.726 | 3.61E-83  |
| SNPH      | -0.699 | -0.745 | -0.138 | 0.193  | 0.449  | 1.41E-45  |
| ACTA2     | 0.589  | 1.186  | 1.511  | 1.996  | 2.44   | 2.99E-74  |
| NBEAL1    | -0.592 | -0.017 | 0.168  | -0.127 | -0.169 | 2.15E-08  |
| LRRC4     | 0.88   | -0.734 | -1.215 | -1.267 | -1.871 | 9.66E-24  |
| PROSER2   | 0.615  | -0.007 | -0.059 | 0.218  | 0.422  | 1.91E-08  |
| SAPCD2    | -0.751 | -1.356 | -0.97  | -0.404 | -0.287 | 8.93E-37  |
| GAS6-AS1  | 0.679  | 1.774  | 2.215  | 1.635  | 1.896  | 1.18E-34  |
| ZNF485    | -0.889 | -0.105 | 0.22   | -0.247 | -0.586 | 9.98E-08  |
| CCDC144B  | -0.773 | -0.16  | 0.095  | -0.932 | -0.749 | 9.62E-08  |
| SLC9A3    | -0.655 | -0.415 | -0.671 | -0.738 | -0.745 | 0.0000978 |
| SP6       | -0.823 | 0.075  | 0.58   | 0.633  | 1.357  | 8.67E-96  |
| CCDC68    | 0.76   | -0.109 | -0.758 | -0.811 | -2.356 | 1.36E-93  |
| HSPA1B    | -0.612 | -0.073 | -0.326 | -0.127 | -0.251 | 0.00264   |
| CDKN3     | -0.814 | -0.906 | -0.796 | -0.854 | -1.017 | 7.18E-13  |
| CPEB4     | 0.604  | 0.322  | 0.076  | 0.096  | 0.226  | 1.95E-10  |
| LRRC27    | -0.846 | -0.139 | -0.043 | -0.644 | 0.039  | 2.14E-10  |
| ZNF331    | -0.578 | 0.01   | 0.255  | -0.421 | -0.418 | 3.58E-07  |
| ARHGAP11A | -0.789 | -0.752 | -0.652 | -0.558 | -1.044 | 1.48E-39  |
| MZF1      | -0.592 | 0.268  | 0.598  | -0.096 | -0.205 | 2.08E-22  |
| FGFR3     | 0.696  | 0.003  | -0.765 | -1.193 | -2.527 | 3.43E-62  |
| ZNF365    | 0.714  | -0.391 | -0.132 | 0.241  | 0.65   | 5.74E-26  |
| CDKN1A    | 2.376  | 2.121  | 1.81   | 1.717  | 2.078  | 3.72E-141 |
| CDKN1B    | -0.677 | -0.178 | -0.237 | -0.16  | -0.719 | 2.24E-33  |
| TNFSF9    | 2.12   | 2.236  | 1.847  | 1.801  | 1.995  | 1.96E-57  |
| CDKN2B    | 0.673  | 0.852  | 0.679  | 0.885  | 2.224  | 1.18E-94  |
| MIR4784   | -0.566 | 0.133  | 0.07   | -0.653 | -0.825 | 0.00146   |
| CDYL2     | 0.722  | -0.021 | 0.098  | 0.235  | 0.786  | 1.91E-43  |
| LINC00476 | -0.712 | -0.286 | -0.083 | -0.393 | -0.122 | 0.00152   |
| CCSER2    | 0.851  | 0.469  | 0.056  | 0.13   | 0.071  | 2.18E-19  |
| ARHGAP33  | -0.794 | -0.391 | -0.362 | -1.205 | -1.926 | 1.2E-36   |
| DBF4      | -0.809 | -0.754 | -0.654 | -0.706 | -1.007 | 5.67E-24  |
| CARD8     | -0.6   | -0.225 | 0.28   | -0.075 | 0.093  | 1.33E-21  |
| RUSC2     | 0.683  | 0.617  | 0.821  | 0.684  | 1.034  | 1.12E-74  |
| PODXL     | 0.579  | -0.047 | -0.282 | -0.009 | 1.023  | 2.67E-57  |

|           |        |        |        |        |        |            |
|-----------|--------|--------|--------|--------|--------|------------|
| IQGAP3    | -0.915 | -0.467 | 0.089  | -0.318 | -0.474 | 6.11E-17   |
| VWCE      | 1.286  | 2.246  | 2.343  | 2.015  | 2.606  | 1.35E-199  |
| FGF2      | 1.11   | 0.858  | 0.306  | 0.435  | -0.171 | 4.74E-64   |
| TNFAIP8L1 | -0.668 | 0.079  | 0.005  | 0.121  | 1.21   | 1.4E-69    |
| ASPM      | -1.222 | -1.564 | -1.409 | -1.062 | -0.734 | 8.06E-73   |
| HOXB3     | -0.833 | -0.325 | -0.035 | -0.682 | -0.102 | 3.78E-11   |
| HOXB2     | -0.737 | -0.278 | -0.454 | -0.535 | -0.392 | 3.06E-13   |
| HOXB5     | -0.621 | -0.401 | -0.129 | -0.726 | -0.034 | 0.00000452 |
| HOXB4     | -0.992 | -0.264 | -0.176 | -0.244 | -0.091 | 8.33E-26   |
| TSPAN33   | 0.715  | 0.291  | -0.106 | -0.034 | -0.928 | 1.31E-07   |
| FOXC2     | 0.786  | -0.23  | -0.175 | 0.249  | -0.417 | 1.26E-31   |
| MSH5      | -0.719 | -0.29  | 0.258  | -0.781 | -1.145 | 3.31E-13   |
| MCM10     | 0.614  | 0.088  | -0.49  | -0.451 | -1.244 | 1.09E-72   |
| PRSS53    | -0.573 | -0.181 | 0.012  | -0.909 | -0.764 | 5.13E-13   |
| PRICKLE2  | 0.844  | -0.157 | -0.34  | -0.122 | 0.015  | 4.42E-12   |
| FOXC1     | 0.611  | -0.145 | -0.348 | 0.05   | 0.069  | 2.02E-11   |
| SNORD35B  | -0.694 | -0.323 | -0.164 | -1.209 | -1.237 | 1.15E-08   |
| FOXF1     | 0.599  | 0.296  | 0.475  | 0.859  | 1.731  | 5.87E-24   |
| CENPA     | -1.959 | -1.654 | -1.115 | -0.623 | -0.843 | 6.4E-54    |
| IL21R     | 1.534  | 0.253  | -0.048 | 0.011  | -1.148 | 8.67E-19   |
| CENPE     | -0.984 | -0.571 | -0.628 | -0.143 | 0.129  | 2.59E-52   |
| CENPF     | -0.779 | -1.039 | -0.728 | -0.337 | -0.306 | 9.15E-37   |
| GNB4      | 0.652  | -0.017 | -0.184 | 0.085  | -0.025 | 3.53E-17   |
| HOXD4     | -0.828 | -0.11  | -0.046 | -0.702 | -0.668 | 1.12E-07   |
| FAM72D    | -0.616 | -0.545 | -0.575 | 0.235  | -0.434 | 0.000108   |
| PLEKHA2   | 0.714  | 0.001  | -0.004 | 0.315  | 0.289  | 5.54E-21   |
| SNAI1     | 0.589  | 0.052  | 0.166  | 0.33   | 0.156  | 0.00182    |
| ANKS3     | -0.597 | -0.056 | 0.036  | -0.511 | -0.425 | 4.23E-07   |
| ZEB1-AS1  | -0.771 | -0.282 | 0.03   | -0.357 | -0.407 | 3.28E-07   |
| STK36     | -0.665 | -0.143 | 0.082  | -0.424 | -0.291 | 1.39E-09   |
| TRIM45    | -0.688 | -0.145 | -0.048 | -0.861 | -1.053 | 4.37E-11   |
| NR4A1     | 1.999  | 1.172  | 0.879  | 0.446  | 0.388  | 5.41E-43   |
| HMMR      | -0.802 | -1.148 | -1.149 | -0.857 | 0.041  | 5.31E-78   |
| GIMAP2    | -0.802 | -0.168 | 0.101  | 0.16   | 0.218  | 5.92E-19   |
| TRIM32    | 0.631  | 0.408  | 0.337  | 0.478  | 0.767  | 2.33E-16   |
| PPM1K     | -0.874 | -0.334 | -0.356 | -0.524 | -0.487 | 1.21E-07   |
| HMOX1     | 0.681  | 0.397  | 0.486  | 0.897  | 1.125  | 1.78E-24   |
| NSUN5P2   | -1.028 | -0.175 | 0.045  | -0.649 | -0.512 | 3.16E-12   |

|            |        |        |        |        |        |            |
|------------|--------|--------|--------|--------|--------|------------|
| HMGCS1     | 0.873  | -0.2   | -0.699 | -0.745 | 0.01   | 4.16E-105  |
| MIR7111    | -0.661 | -0.605 | -0.608 | -1.047 | -1.018 | 0.00625    |
| HES7       | -1.101 | -0.168 | -0.253 | -0.546 | 0.105  | 0.00000635 |
| MTHFR      | -0.621 | -0.098 | 0.086  | -0.04  | -0.175 | 5.49E-19   |
| FUK        | -0.684 | -0.124 | 0.015  | -0.331 | -0.323 | 1.99E-08   |
| EDA2R      | 0.797  | 1.272  | 1.287  | 0.679  | 1.219  | 3.25E-50   |
| FAM83G     | 0.683  | 0.227  | 0.777  | 0.802  | 0.627  | 9.29E-20   |
| GRASP      | 0.984  | -0.013 | -0.085 | -0.238 | -0.314 | 1.08E-60   |
| SHB        | 0.683  | -0.082 | 0.048  | 0.45   | 0.779  | 7.97E-23   |
| GLIS2      | 0.915  | 0.204  | 0.141  | 0.096  | 0.69   | 2.78E-28   |
| KLF13      | 1.157  | -0.084 | 0.337  | 0.692  | 0.809  | 3.85E-50   |
| SELE       | 1.765  | 1.732  | 0.2    | -0.316 | 2.629  | 1.52E-38   |
| FBXL19-AS1 | -0.633 | 0.008  | 0.294  | -0.458 | -0.519 | 1.33E-08   |
| PLK3       | 1.089  | 0.695  | 0.764  | 0.265  | 0.64   | 1.21E-32   |
| SOX18      | 0.578  | -0.377 | -0.394 | -0.286 | 0.904  | 4.75E-35   |
| NUF2       | -0.68  | -0.773 | -0.557 | -0.27  | -0.916 | 1.3E-34    |
| MIR1914    | -0.836 | -0.378 | -0.529 | -1.165 | -0.935 | 0.00000479 |
| VGLL3      | 0.641  | 0.136  | 0.227  | 0.537  | 0.306  | 1.83E-15   |
| WSB1       | -0.572 | 0.096  | 0.391  | -0.47  | -0.295 | 8.04E-12   |
| RNF215     | -0.636 | -0.295 | -0.083 | -0.536 | -0.52  | 7.55E-13   |
| RNF207     | -0.575 | 0.576  | 1.127  | 0.147  | 1.303  | 5.31E-20   |
| MSX2       | 0.947  | 0.455  | 0.065  | 0.358  | 0.437  | 0.00000267 |
| TES        | 0.755  | 0.181  | 0.073  | 0.412  | 0.028  | 7.7E-31    |
| C14orf79   | -0.835 | -0.096 | -0.019 | -0.679 | -0.255 | 7.56E-11   |
| ZNF449     | -0.731 | -0.057 | -0.034 | -0.66  | -0.416 | 5.53E-08   |
| RHOBTB1    | 0.599  | 0.108  | 0.226  | 0.455  | 1.512  | 1.28E-107  |
| WTIP       | 0.586  | -0.004 | -0.264 | -0.518 | -0.281 | 4.4E-44    |
| XPC        | 0.726  | 0.986  | 0.91   | 0.898  | 1.323  | 6.37E-69   |
| AGER       | -0.639 | 0.045  | 0.124  | -0.924 | -1.043 | 2.1E-17    |
| PRKCE      | 0.645  | -0.121 | -0.038 | 0.431  | 0.564  | 6.12E-26   |
| JAG1       | 0.705  | 0.194  | -0.098 | -0.256 | 0.865  | 6.68E-43   |
| MST1       | -0.834 | -0.018 | 0.237  | -0.764 | -0.713 | 2.52E-11   |
| SPHK1      | 0.656  | 0.354  | 0.268  | 0.052  | 1.037  | 1.04E-48   |
| HIVEP2     | 1.96   | 1.702  | 0.902  | 0.484  | 2.073  | 6.42E-54   |
| HK2        | -0.655 | -0.375 | -0.519 | -0.586 | -1.128 | 2.71E-18   |
| SPSB1      | 1.258  | 0.072  | 0.674  | 1.086  | 2.131  | 4.07E-73   |
| SKI        | 0.779  | 0.02   | 0.032  | 0.209  | 0.326  | 1.67E-22   |
| EME2       | -0.695 | 0.041  | 0.129  | -0.708 | -0.665 | 1.37E-09   |

|           |        |        |        |        |        |            |
|-----------|--------|--------|--------|--------|--------|------------|
| COX10-AS1 | -0.623 | -0.334 | -0.012 | -0.575 | -0.231 | 0.0000674  |
| SKIL      | 0.737  | 0.197  | 0.457  | 0.421  | 0.337  | 1.45E-27   |
| AIM1      | -0.665 | -0.09  | 0.326  | 0.559  | 1.254  | 1.57E-80   |
| AHR       | 0.896  | 0.441  | -0.216 | -0.138 | -0.401 | 1.23E-35   |
| RAB30     | 0.857  | 0.125  | -0.009 | 0.216  | 0.069  | 4.45E-37   |
| BTBD11    | 0.683  | 0.005  | -0.23  | 0.024  | 0.819  | 1.15E-10   |
| CKS2      | -1.135 | -0.916 | -0.563 | -0.96  | -0.798 | 0.00000118 |
| WASF3     | -0.626 | -0.376 | -0.343 | -0.424 | -0.715 | 2.01E-34   |
| ALDH1A3   | 0.698  | 0.03   | -0.396 | -0.152 | 0.111  | 9.95E-13   |
| PHLPP2    | 0.676  | 0.131  | -0.148 | -0.558 | -0.074 | 1.29E-50   |
| FBXL6     | -0.597 | 0.193  | 0.041  | -0.784 | -0.606 | 9.91E-15   |
| NRG1      | -1.283 | 0.805  | 0.16   | -0.112 | -0.891 | 2.73E-256  |
| ETS1      | 0.681  | 0.683  | 0.691  | 0.738  | 1.723  | 2.37E-140  |
| ALDH3A1   | 1.637  | 2.573  | 2.971  | 3.609  | 3.866  | 1.16E-138  |
| NR1D2     | 1.366  | 0.218  | -0.069 | 0.577  | 1.054  | 3.95E-65   |
| HHEX      | 0.627  | 0.135  | -0.096 | -0.117 | -0.137 | 4.46E-20   |
| CLEC2B    | -0.837 | -0.204 | -0.3   | -0.802 | -1.006 | 7.25E-08   |
| SPSB2     | -1.018 | -0.281 | -0.451 | -0.694 | -0.95  | 1.21E-13   |
| CTC1      | -0.598 | 0.252  | 0.449  | 0.145  | 0.214  | 3.73E-39   |
| MAML3     | 0.767  | -0.493 | 0.556  | 0.888  | 1.245  | 1.97E-59   |
| DBF4B     | -0.861 | -0.517 | -0.437 | -0.804 | -0.94  | 1.84E-18   |
| AMIGO2    | 0.762  | 0.633  | 0.335  | 0.067  | 1.026  | 5.3E-24    |
| PSRC1     | -2.334 | -2.493 | -1.695 | -1.101 | -1.16  | 4.18E-102  |
| EVI2A     | -0.727 | -1.177 | -1.096 | -0.968 | 0.366  | 1.73E-12   |
| PTPN22    | 0.706  | -0.201 | 0.213  | 0.722  | 2.914  | 1.28E-107  |
| FBXO43    | -1.212 | -0.722 | -0.287 | -0.309 | -1.363 | 6.42E-15   |
| RRM2B     | 0.606  | 1.02   | 1.008  | 1.006  | 1.278  | 3.18E-85   |
| RND1      | 1.821  | 1.587  | -0.099 | -0.025 | 2.075  | 1.67E-38   |
| ACCS      | -0.77  | -0.1   | 0.07   | -0.633 | -0.146 | 0.0000013  |
| PLK2      | 1.436  | 1.23   | 1.115  | 0.827  | 1.691  | 4.22E-120  |
| PAN2      | -0.713 | -0.145 | 0.318  | -0.334 | -0.711 | 8.86E-27   |
| APLN      | -1.27  | -0.018 | 0.865  | 1.041  | 2.279  | 1.18E-61   |
| HECA      | 0.868  | 0.201  | 0.192  | 0.366  | 0.667  | 1.6E-33    |
| TRIM46    | -1.143 | -0.261 | 0.056  | -0.51  | -0.239 | 3.38E-29   |
| BMS1P4    | -0.748 | 0.006  | 0.241  | -0.82  | -0.654 | 0.00000127 |
| ST3GAL1   | 0.592  | -0.068 | 0.047  | 0.091  | -0.183 | 6.67E-24   |
| CENPS     | -0.587 | -0.427 | 0.005  | -0.163 | -0.47  | 0.0112     |
| EZH1      | -0.589 | 0.059  | 0.333  | -0.41  | -0.48  | 2.09E-18   |

|            |        |        |        |        |        |           |
|------------|--------|--------|--------|--------|--------|-----------|
| ALPL       | 0.79   | 0.689  | 0.236  | 0.292  | -1.034 | 2.81E-13  |
| MIR137HG   | -0.576 | -0.211 | -0.089 | -0.268 | -0.482 | 0.0016    |
| ALS2CL     | -0.578 | 0.049  | 0.79   | 0.267  | -0.055 | 2.34E-22  |
| ZBTB48     | -0.799 | -0.01  | 0.002  | -0.569 | -0.687 | 1.97E-23  |
| CDCA3      | -1.161 | -1.101 | -0.764 | -0.838 | -1.505 | 1.07E-37  |
| MXD3       | -1.364 | -1.093 | -0.508 | -0.476 | -1.281 | 1.28E-20  |
| PGF        | 0.632  | -0.047 | 0.252  | 0.376  | 1.5    | 1.35E-104 |
| SH3BP4     | 0.741  | 0.099  | 0.038  | 0.287  | 0.273  | 5.25E-13  |
| FAM72B     | -0.919 | -0.531 | -0.441 | -0.726 | -0.984 | 7.95E-09  |
| CLDN7      | -0.571 | -0.174 | 0.194  | -0.083 | 0.823  | 2.94E-20  |
| POLG2      | -0.706 | -0.004 | 0.225  | -0.38  | -0.59  | 1.73E-13  |
| SLC25A29   | -0.816 | -0.315 | -0.18  | -1.007 | -0.816 | 8.1E-28   |
| PLCXD2     | -0.577 | 0.46   | 0.762  | 0.359  | 1.074  | 3.52E-26  |
| UNC5B      | 1.224  | -0.184 | -0.838 | -0.761 | 0.022  | 8.12E-31  |
| LRRC45     | -0.735 | -0.266 | -0.057 | -0.351 | -0.366 | 6.65E-07  |
| HIF3A      | -0.636 | -0.41  | 0.117  | -0.272 | -1.101 | 1.44E-40  |
| TROAP      | -1.432 | -1.086 | -0.705 | -1.037 | -1.062 | 3.44E-24  |
| CBLN3      | -1.016 | 0.169  | 0.677  | -0.219 | 0.94   | 3.91E-29  |
| ACP6       | -0.882 | -0.04  | 0.07   | -0.574 | -0.419 | 1.41E-10  |
| ZNF799     | -0.801 | -0.337 | -0.284 | -0.573 | -0.682 | 0.000661  |
| SNHG11     | -0.627 | -0.289 | -0.181 | -0.802 | -0.669 | 0.0000115 |
| GENE       | 0.605  | 0.323  | 0.133  | 0.219  | 0.277  | 1.27E-11  |
| MAP3K6     | 0.603  | 0.056  | -0.2   | -0.605 | -1.164 | 3.01E-100 |
| PIF1       | -2.384 | -2.239 | -1.326 | -1.384 | -1.354 | 1.73E-51  |
| FAM46A     | 1.02   | 0.669  | 0.152  | 0.079  | 0.076  | 1.5E-59   |
| SNORA3A    | -0.602 | 0.124  | 0.006  | -0.838 | -0.356 | 0.0041    |
| MST1P2     | -0.655 | 0.027  | 0.147  | -0.383 | -0.707 | 0.000531  |
| TCEANC2    | -0.832 | -0.164 | 0.036  | -0.309 | -0.429 | 1.35E-16  |
| SLC16A13   | -0.727 | 0.024  | 0.037  | 0.05   | -0.161 | 1.11E-09  |
| KLHL17     | -0.884 | -0.37  | -0.226 | -1.043 | -0.758 | 3.54E-14  |
| ENOSF1     | -0.715 | -0.322 | -0.15  | -0.769 | -0.91  | 2.14E-17  |
| STAG3L5P-F | -0.802 | 0.001  | 0.159  | -0.909 | -0.928 | 1.86E-21  |
| PLEK2      | 0.594  | -0.15  | -0.334 | -0.098 | 0.448  | 3.07E-31  |
| CENPI      | -0.693 | -0.341 | -0.177 | -0.247 | -0.461 | 1.83E-17  |
| RASSF8     | 0.627  | 0.169  | 0.059  | 0.384  | 0.847  | 2.46E-44  |
| ENKUR      | 0.823  | 0.423  | 0.308  | 0.133  | -0.752 | 3.74E-11  |
| NR5A2      | -0.879 | -0.122 | -0.765 | -0.587 | -0.643 | 4.51E-21  |
| STAG3L5P   | -0.797 | -0.073 | 0.209  | -0.877 | -0.646 | 9.41E-14  |



|             |        |        |        |        |        |           |
|-------------|--------|--------|--------|--------|--------|-----------|
| LYRM9       | -0.683 | 0.094  | 0.043  | -0.02  | 0.499  | 0.000341  |
| CXCL8       | -0.937 | 0.012  | -0.628 | -1.346 | -0.567 | 6.18E-13  |
| WDR27       | -0.818 | -0.158 | 0.38   | -0.424 | -0.051 | 2.88E-12  |
| ZNF692      | -1.151 | -0.08  | 0.164  | -0.886 | -0.686 | 1.83E-23  |
| PHLDA3      | 1.657  | 1.824  | 1.633  | 1.737  | 2.151  | 1.07E-97  |
| MDM2        | 2.096  | 1.75   | 1.922  | 1.397  | 1.909  | 2.57E-175 |
| NIFK-AS1    | -0.931 | -0.443 | -0.218 | -0.236 | -0.35  | 0.0000672 |
| ADAMTS6     | -0.637 | 0.02   | -0.235 | -0.807 | -0.75  | 1.62E-16  |
| MEF2A       | 0.861  | 0.234  | 0.312  | 0.221  | 0.503  | 1.67E-72  |
| CXCL12      | 0.749  | 0.03   | -0.782 | -1     | -3.244 | 2.27E-66  |
| TRPM3       | -0.785 | -0.124 | -0.496 | -1.301 | -1.536 | 4.33E-28  |
| C15orf52    | -0.728 | -0.046 | 0.719  | 0.24   | 0.401  | 3.2E-27   |
| KLF3        | 0.742  | 0.289  | 0.264  | 0.288  | 0.647  | 1.4E-24   |
| PAPD5       | 0.692  | 0.443  | 0.473  | 0.58   | 0.809  | 1.42E-20  |
| SLX1A-SULT1 | -0.658 | -0.304 | 0.05   | -0.553 | -0.608 | 0.0203    |
| TNFSF18     | -0.978 | 0.252  | 0.425  | 0.086  | 1.224  | 2.15E-35  |
| MEF2C       | 0.719  | -0.131 | -0.135 | 0.178  | -0.092 | 3.24E-26  |
| IER5        | 1.026  | 0.629  | 0.739  | 0.848  | 1.374  | 8.61E-56  |
| ATF7IP2     | -0.71  | -0.17  | -0.109 | -0.436 | -0.136 | 0.000357  |
| TMEM198B    | -0.593 | 0.328  | 0.549  | -0.189 | 0.203  | 4.1E-15   |
| TNFAIP8L3   | 0.953  | -0.172 | -0.419 | -0.276 | 0.101  | 2.06E-46  |
| F2RL3       | 0.74   | 0.467  | 1.161  | 1.294  | 2.249  | 6.57E-39  |
| BIRC3       | 0.633  | 2.139  | 1.267  | 0.358  | 2.021  | 5.89E-66  |
| FAM72A      | -0.771 | -0.216 | -0.415 | -0.594 | -0.776 | 0.0000242 |
| VSIG2       | -0.962 | -0.328 | 0.25   | -0.894 | -0.406 | 2.74E-10  |
| CDC42EP4    | 0.698  | 0.032  | 0.225  | 0.61   | 0.427  | 2.51E-12  |
| ANKRD36     | -0.755 | -0.193 | 0.016  | -0.977 | -0.911 | 2.73E-11  |
| KBTBD3      | -0.651 | -0.211 | 0.022  | 0.008  | -0.178 | 0.00747   |
| MIR503      | -0.901 | -0.258 | -0.26  | -0.711 | -0.407 | 0.0398    |
| UBC         | 0.648  | 0.228  | 0.229  | 0.629  | 0.658  | 8.16E-08  |
| FAM131A     | -0.668 | -0.29  | -0.072 | -0.07  | 0.155  | 1.06E-20  |
| MCM6        | 0.583  | 0.067  | -0.575 | -0.527 | -0.765 | 6.87E-34  |
| GTPBP2      | -0.588 | -0.06  | 0.055  | -0.395 | -0.277 | 2.43E-14  |
| PDE4D       | 0.821  | 0.971  | 0.666  | 0.53   | 0.906  | 2.43E-32  |
| ABCC5       | -0.745 | -0.233 | -0.05  | -0.641 | -0.272 | 4.28E-12  |
| RAB20       | 0.587  | -0.233 | -0.087 | 0.155  | -0.124 | 0.00203   |
| SHROOM1     | -0.781 | -0.172 | -0.02  | -0.525 | -0.165 | 1.5E-15   |
| TYRO3P      | 0.589  | -0.063 | -0.291 | -0.075 | -0.182 | 4.45E-07  |

|          |        |        |        |        |        |           |
|----------|--------|--------|--------|--------|--------|-----------|
| CLDN14   | 1.198  | 1.063  | 1.359  | 1.657  | 2.87   | 1.25E-47  |
| FAS      | 0.871  | 1.51   | 1.348  | 0.91   | 1.263  | 4.6E-35   |
| TYSND1   | -0.826 | -0.595 | -0.428 | -0.456 | -0.364 | 9.26E-09  |
| DEPDC1   | -1.194 | -1.64  | -1.389 | -1.112 | -0.643 | 3.17E-54  |
| G2E3     | -0.935 | -0.835 | -0.799 | -0.53  | -0.297 | 2.22E-39  |
| RABL2A   | -0.628 | 0.011  | 0.18   | -0.178 | 0.096  | 0.0295    |
| BRICD5   | -0.631 | -0.283 | 0.005  | -1.078 | -0.629 | 1.1E-10   |
| GJC1     | 0.656  | 0.231  | -0.03  | -0.214 | -0.065 | 4.34E-46  |
| KLF6     | -0.668 | 0.278  | 0.005  | -0.258 | 0.26   | 4.57E-65  |
| SCNN1D   | -0.707 | 0.359  | 0.899  | 0.102  | 0.667  | 1.13E-11  |
| TNFRSF4  | -0.87  | 0.619  | 1.209  | 0.905  | 3.413  | 1.77E-111 |
| ANKRD23  | -0.748 | -0.038 | -0.035 | -1.098 | -1.027 | 1.29E-09  |
| FOXO3B   | 0.665  | 0.242  | 0.21   | 0.254  | 0.562  | 0.000508  |
| WDR76    | 0.624  | 0.02   | -0.594 | -0.789 | -1.588 | 3.11E-140 |
| PLK1     | -1.146 | -2.204 | -1.641 | -0.69  | -0.644 | 6.28E-77  |
| AURKB    | -0.801 | -0.663 | -0.378 | -0.245 | -1.125 | 5.85E-45  |
| FOXO1    | 0.586  | 0.567  | 0.406  | 0.49   | 0.888  | 4.4E-28   |
| TUFT1    | 0.776  | 0.258  | 0.014  | 0.276  | 0.917  | 7.63E-16  |
| ID2      | 1.777  | -0.006 | 0.227  | 0.29   | -1.252 | 2.08E-49  |
| ATOH8    | 1.326  | -0.402 | -0.24  | 0.105  | -0.534 | 6.25E-50  |
| ANKRD33B | 0.768  | 0.583  | 0.178  | 0.097  | 0.178  | 3.61E-27  |
| DCP1B    | 0.72   | 0.792  | 0.897  | 0.851  | 0.928  | 8.31E-18  |
| CIT      | -0.663 | -0.603 | -0.414 | -0.393 | -0.273 | 6.9E-20   |
| ID1      | 0.955  | -0.361 | 0.003  | 0.206  | -1.865 | 5.48E-39  |
| GSTT2B   | -0.803 | -0.03  | 0.144  | -0.564 | -0.96  | 2.14E-16  |
| RCAN3    | 0.713  | 0.039  | 0.217  | 0.517  | 0.421  | 1.04E-08  |
| PMCH     | -0.609 | -0.178 | -0.388 | -0.971 | -1.55  | 6.16E-12  |
| ARHGEF39 | -1.641 | -1.278 | -0.793 | -0.828 | -1.656 | 1.92E-27  |
| PMAIP1   | 0.575  | 0.715  | 0.526  | 0.14   | 1.243  | 4.79E-36  |
| SPTBN5   | -0.609 | -0.293 | 0.148  | -0.775 | 0.548  | 2.88E-20  |
| MICE     | -0.78  | -0.112 | -0.169 | -1.001 | -1.211 | 1.02E-07  |
| HES2     | 0.677  | 0.433  | 0.892  | 1.227  | 1.993  | 1.74E-187 |
| TTK      | -0.795 | -0.904 | -0.851 | -0.191 | -0.319 | 4.28E-47  |
| AASS     | -0.633 | -0.179 | -0.198 | -0.48  | -0.649 | 4.97E-11  |
| GOLGA6L9 | -0.712 | -0.107 | -0.498 | -1.192 | -0.675 | 0.0000297 |
| RHOB     | 0.867  | 0.173  | -0.235 | -0.044 | 0.259  | 9.35E-37  |
| IFIT3    | 1.107  | 0.061  | 0.436  | 1.181  | 1.64   | 1.91E-21  |
| ZNF696   | -0.691 | 0.2    | 0.014  | -0.152 | -0.11  | 1.86E-10  |

|          |        |        |        |        |        |            |
|----------|--------|--------|--------|--------|--------|------------|
| SPRED3   | -0.784 | -0.077 | 0.037  | -0.323 | -0.262 | 2.02E-30   |
| HCG25    | #N/A   | #N/A   | #N/A   | #N/A   | #N/A   | #N/A       |
| ZNF546   | -1.089 | -0.034 | -0.034 | -0.264 | -0.587 | 4.48E-08   |
| RASSF9   | 1.096  | 0.352  | 0.629  | 0.863  | 1.016  | 2.04E-16   |
| RCCD1    | -0.697 | -0.533 | -0.106 | -0.324 | 0.045  | 2E-14      |
| ASGR1    | -0.573 | 0.015  | 0.407  | 0.122  | 0.526  | 2.67E-08   |
| ZNF514   | -0.785 | 0.051  | 0.132  | -0.498 | -0.391 | 5.71E-08   |
| KIF20A   | -0.925 | -1.674 | -1.54  | -0.572 | -0.283 | 8.6E-50    |
| PLAU     | 0.655  | 0.743  | 1.531  | 1.733  | 4.057  | 3.97E-296  |
| KITLG    | 0.994  | 1.049  | 0.781  | 1.048  | 2.583  | 9.34E-145  |
| LRRC75A  | -0.642 | -0.473 | -0.202 | -0.264 | 0.024  | 0.00118    |
| TTC14    | -0.662 | 0.019  | 0.08   | -0.593 | -0.265 | 0.00000031 |
| LNX2     | 0.637  | -0.116 | -0.136 | 0.064  | 0.007  | 8.19E-26   |
| CCDC142  | -0.688 | -0.104 | 0.128  | -0.435 | -0.614 | 1.2E-12    |
| ARVCF    | -0.848 | 0.088  | 0.475  | 0.123  | 1.517  | 7.92E-87   |
| CPT1C    | -0.625 | -0.281 | -0.041 | -0.307 | -0.22  | 4.94E-09   |
| EXO1     | 0.828  | 0.299  | -0.235 | -0.317 | -1.226 | 9.09E-82   |
| PPP1R16A | -0.656 | -0.085 | -0.046 | -0.339 | -0.28  | 1.06E-10   |
| HERC2P9  | -0.616 | -0.117 | -0.029 | -0.807 | -0.839 | 0.000494   |
| ZNF839   | -0.732 | -0.079 | 0.149  | -0.254 | -0.488 | 7.24E-16   |
| HERC2P3  | -1.208 | -0.461 | -0.229 | -1.234 | -1.028 | 4.97E-08   |
| MN1      | 1.756  | 0.574  | 0.789  | 0.872  | 1.431  | 4.62E-43   |
| PIK3C2B  | -0.728 | -0.577 | -0.018 | 0.008  | 0.27   | 3.18E-28   |
| TICRR    | -0.664 | -0.547 | -0.584 | -0.873 | -0.968 | 2.12E-16   |
| ZMAT3    | 0.888  | 1.07   | 0.796  | 0.848  | 1.082  | 3.46E-43   |
| ATF3     | 3.62   | 2.856  | 2.38   | 1.628  | 2.592  | 4.81E-256  |
| DEPDC1B  | -0.96  | -1.083 | -0.913 | -0.667 | -1.498 | 1.26E-51   |
| SAMD1    | 0.579  | -0.223 | -0.827 | -1.082 | -0.565 | 3.28E-62   |
| CCNE2    | 0.858  | 0.194  | -0.632 | -1.459 | -1.955 | 1.16E-254  |
| DLL4     | -1.421 | -0.079 | -0.042 | 0.022  | 0.448  | 2.57E-54   |
| HTR1D    | 0.774  | 0.482  | 0.78   | 1.043  | 0.603  | 0.00000154 |
| MRM1     | -0.888 | -0.045 | -0.319 | -0.663 | -0.725 | 2.51E-14   |
| MIR6835  | -1.05  | 0.05   | -0.064 | -0.553 | -0.858 | 0.000101   |
| TP53INP1 | 1.753  | 1.398  | 1.291  | 1.006  | 1.758  | 6.4E-244   |
| RAPGEF4  | 0.615  | -0.109 | -0.261 | -0.182 | 0.287  | 7.87E-12   |
| C10orf10 | -1.602 | 0.34   | -0.073 | -0.113 | 1.967  | 6.11E-62   |
| LBHD1    | -0.57  | -0.127 | 0.349  | -0.23  | -0.262 | 0.000181   |
| UBE2C    | -0.752 | -1.399 | -1.25  | -0.934 | -0.683 | 4.18E-71   |

|          |        |        |        |        |        |           |
|----------|--------|--------|--------|--------|--------|-----------|
| TRIB1    | -0.843 | 0.745  | 0.889  | 0.694  | 2.001  | 1.14E-156 |
| SGO1     | -0.674 | -0.504 | -0.4   | -0.065 | -0.708 | 4.09E-15  |
| CBARP    | -0.757 | -0.109 | -0.152 | -0.823 | -0.108 | 2.06E-12  |
| RRAD     | 0.893  | 1.526  | 1.087  | 0.278  | 2.465  | 2.56E-26  |
| MTMR4    | -0.756 | -0.178 | -0.197 | -0.364 | -0.709 | 8.97E-41  |
| HYLS1    | -0.927 | -0.851 | -0.667 | -0.322 | -0.246 | 8.55E-22  |
| MKI67    | -0.9   | -0.761 | -0.542 | -0.411 | -1.14  | 3.01E-37  |
| CSF3     | -1.789 | -0.501 | 0.25   | -0.337 | 0.392  | 1.54E-26  |
| CADPS2   | 0.616  | 0.087  | -0.111 | 0.115  | -0.292 | 5.15E-13  |
| TBX18    | -0.688 | -0.212 | -0.663 | -0.743 | -1.089 | 2.41E-46  |
| SERPINB8 | 0.685  | 0.115  | -0.125 | 0.103  | 0.137  | 5.33E-27  |
| KNSTRN   | -0.835 | -0.878 | -0.691 | -0.312 | -0.398 | 1.44E-40  |
| ANKRD35  | -0.682 | -0.812 | -0.667 | -0.605 | -1.376 | 5.73E-09  |
| FAM193B  | -0.69  | 0.048  | -0.025 | -0.904 | -0.801 | 5.19E-23  |
| TNK2     | -0.725 | -0.497 | -0.092 | -0.532 | -0.172 | 1.64E-14  |
| DHRS13   | -0.661 | -0.393 | -0.189 | -0.089 | -1.123 | 4.33E-15  |
| REST     | 1.058  | 0.249  | 0.364  | 0.661  | 0.69   | 7.91E-25  |
| DDB2     | 0.652  | 1.191  | 1.211  | 1.142  | 1.125  | 8.19E-88  |
| PARGP1   | -0.616 | -0.117 | -0.093 | -0.99  | -0.593 | 1.1E-09   |
| TGIF1    | -0.874 | 0.148  | 0.228  | 0.229  | 1.106  | 1.55E-84  |
| MIIP     | -0.759 | -0.358 | -0.252 | -0.491 | -0.561 | 1.17E-10  |
| GADD45A  | 1.233  | 1.076  | 1.153  | 0.88   | 1.778  | 9.5E-161  |
| GATS     | -0.604 | 0.217  | 0.267  | 0.143  | 0.835  | 4.59E-11  |
| GPC2     | -0.782 | -0.165 | -0.299 | -0.896 | -0.1   | 2.25E-07  |
| TGFBR1   | 0.838  | 0.422  | 0.084  | 0.017  | 0.349  | 8.54E-25  |
| SS18L2   | -0.655 | -0.314 | -0.382 | -0.725 | -0.918 | 3.98E-11  |
| DDX18P5  | #N/A   | #N/A   | #N/A   | #N/A   | #N/A   | #N/A      |
| PPP1R35  | -0.972 | -0.467 | -0.193 | -0.313 | -0.067 | 8.18E-15  |
| GLI4     | -0.715 | 0.025  | 0.164  | -0.484 | -0.705 | 6.62E-11  |
| KDM7A    | 1.15   | 0.19   | 0.109  | -0.299 | 0.648  | 5.18E-26  |
| SMAP1    | 0.591  | 0.053  | -0.211 | 0.001  | -0.033 | 1.13E-12  |
| BCL6B    | -0.728 | 0.208  | 0.147  | -0.443 | 0.602  | 5.94E-39  |
| NOG      | 1.557  | -0.278 | 0.083  | 0.402  | 2.14   | 4.34E-35  |
| KDM3A    | 0.799  | 0.198  | -0.1   | -0.131 | 0.264  | 5.62E-26  |
| KIT      | -0.925 | 0.31   | 1.18   | 1.24   | 2.72   | 1.08E-42  |
| SNHG10   | -0.692 | -0.32  | -0.295 | -0.908 | -0.629 | 0.0000239 |
| HES4     | -0.561 | -0.079 | -0.273 | -0.776 | 0.687  | 2.34E-09  |
| DDIT3    | -0.854 | -0.038 | -0.089 | -0.597 | -0.385 | 1.06E-10  |

|          |        |        |        |        |        |            |
|----------|--------|--------|--------|--------|--------|------------|
| NEDD4L   | 0.666  | -0.074 | -0.007 | 0.296  | 1.058  | 1.04E-57   |
| OXSM     | -0.624 | -0.151 | -0.113 | -0.422 | -0.59  | 0.00000659 |
| CCDC121  | -0.703 | -0.169 | -0.081 | -0.223 | -0.481 | 0.021      |
| DGKQ     | -0.637 | -0.073 | -0.174 | -0.822 | -0.431 | 4.27E-13   |
| MFHAS1   | 0.868  | 0.084  | 0.148  | 0.225  | 0.65   | 1.38E-24   |
| PRPF40B  | -0.584 | -0.169 | -0.165 | -0.518 | -1.36  | 2.47E-23   |
| NEIL1    | -0.867 | -0.204 | 0.045  | -0.703 | -0.593 | 2.3E-10    |
| TMEM42   | -0.712 | -0.208 | 0.091  | -0.281 | -0.123 | 0.00000117 |
| HSBP1L1  | -0.645 | -0.326 | -0.162 | -0.609 | 0.263  | 0.00000431 |
| C3orf18  | -0.628 | 0.279  | 0.465  | 0.055  | 0.108  | 1.25E-07   |
| CCDC71L  | -0.66  | -0.101 | -0.39  | -0.358 | -0.684 | 1.7E-26    |
| SYNM     | 0.713  | 0.756  | 0.141  | -0.364 | 0.069  | 4.79E-42   |
| TIMP3    | -0.582 | 0.552  | 0.69   | 0.237  | 0.785  | 6.87E-08   |
| MIR17HG  | -0.748 | -0.332 | -0.407 | -1.57  | -1.362 | 5.89E-18   |
| CLEC4GP1 | -1.853 | -0.906 | -0.02  | -0.564 | -0.337 | 3.34E-13   |
| RPS6KA5  | 0.836  | -0.031 | -0.089 | -0.295 | -1.319 | 1.24E-46   |
| FAM111B  | 0.663  | 0.258  | -0.43  | -0.596 | -1.919 | 1.64E-87   |
| HERC2P2  | -1.062 | -0.202 | 0.08   | -0.937 | -0.873 | 1.88E-20   |
| FAM27B   | -0.61  | 0.104  | 0.089  | 0.033  | -0.751 | 0.0000783  |
| MIR10B   | #N/A   | #N/A   | #N/A   | #N/A   | #N/A   | #N/A       |
| UHRF1    | 0.826  | -0.163 | -0.763 | -0.764 | -0.698 | 5.58E-63   |
| GJA5     | 0.594  | -0.655 | -1.596 | -1.354 | -3.065 | 3.31E-50   |
| RGS2     | -0.841 | -0.599 | -0.481 | -0.422 | 0.672  | 7.09E-18   |
| ZBTB18   | -0.622 | -0.151 | -0.087 | -0.245 | -0.422 | 7E-21      |
| ZNF780B  | -0.647 | -0.08  | 0.059  | -0.352 | -0.171 | 4.93E-07   |
| MIR3189  | 1.057  | 1.308  | 1.355  | 0.669  | 1.112  | 0.0000192  |
| TLL1     | 0.608  | 0.014  | -0.402 | -0.464 | -0.784 | 1.32E-16   |
| C3orf52  | 1.307  | 0.868  | 0.766  | 0.377  | 0.613  | 8.31E-31   |
| EGFL8    | -0.569 | -0.019 | 0.06   | -0.731 | -0.905 | 0.00000363 |
| CD274    | -1.229 | 0.046  | -0.009 | -0.447 | -0.201 | 1.37E-53   |
| PMEPA1   | 0.753  | -0.171 | -0.357 | 0.388  | 1.39   | 1.98E-53   |
| MIR3153  | -1.018 | -0.573 | -0.371 | -0.989 | -0.85  | 0.00361    |
| RFX2     | 1.24   | 0.035  | 0.165  | 0.46   | -0.401 | 4.36E-29   |
| DLC1     | 0.711  | 0.301  | 0.355  | 0.493  | 0.678  | 8.84E-22   |
| THSD1    | 1.018  | 0.853  | 1.087  | 1.096  | 1.193  | 4.27E-74   |
| RARB     | 0.705  | 0.361  | -0.02  | 0.754  | 1.708  | 1.33E-30   |
| NDRG1    | 0.732  | 0.179  | 0.009  | 0.338  | 0.445  | 1.23E-12   |
| STEAP2   | -0.994 | -0.513 | -0.775 | -1.012 | -1.371 | 1.94E-57   |

|          |        |        |        |        |        |           |
|----------|--------|--------|--------|--------|--------|-----------|
| TNS2     | -0.638 | -0.314 | -0.003 | -0.323 | -0.673 | 5.54E-31  |
| BAMBI    | 0.659  | -0.199 | -0.411 | -0.047 | -0.51  | 2.44E-15  |
| FAM109A  | 0.655  | 0.103  | 0.094  | 0.127  | 0.419  | 1.06E-14  |
| SGK494   | -0.872 | -0.027 | 0.134  | -0.696 | -0.627 | 1.55E-09  |
| ANKRD34A | -0.8   | 0.15   | 0.27   | 0.262  | -0.05  | 4.34E-07  |
| CYP26A1  | -2.08  | -0.601 | -0.947 | -1.879 | -2.427 | 1.59E-31  |
| ANKRD36B | -0.794 | -0.251 | -0.062 | -0.681 | -0.786 | 0.0000106 |
| KCNJ2    | 1.253  | 0.974  | 1.622  | 1.421  | 1.33   | 6.59E-24  |
| CEACAM1  | 0.568  | 1.604  | 1.948  | 2.11   | 3.632  | 2.54E-115 |
| GSDMB    | -0.652 | 0.249  | 0.594  | -0.41  | -0.07  | 5.54E-09  |
| RAD52    | -0.9   | 0.006  | 0.162  | -0.537 | -0.59  | 9.19E-22  |
| KIF18B   | -1.02  | -0.798 | -0.54  | -0.776 | -1.499 | 2.22E-55  |
| GNB3     | -0.621 | -0.345 | -0.145 | -1.261 | -1.067 | 1.15E-16  |
| RAD51    | 0.573  | 0.08   | -0.372 | -0.194 | -0.586 | 1.13E-11  |
| NSUN5P1  | -1.025 | -0.406 | -0.098 | -0.95  | -0.668 | 1.45E-10  |
| QRICH2   | -0.675 | -0.02  | 0.412  | -0.116 | 0.707  | 2.86E-12  |
| GNAI1    | 0.597  | 0.015  | -0.165 | 0.258  | 0.431  | 2.23E-11  |
| FAM212B  | 1.646  | 1.532  | 1.434  | 1.13   | 1.716  | 1.47E-16  |
| MYCBPAP  | -0.587 | 0.441  | 1.538  | 0.932  | 2.55   | 2.47E-59  |
| MIR5581  | -0.903 | -0.41  | -0.217 | -0.912 | -0.576 | 0.0116    |
| ZNF436   | 0.98   | 0.601  | 0.324  | 0.27   | 0.66   | 5.48E-25  |
| PA2G4P1  | 0.576  | 0.15   | 0.112  | 0.422  | -0.019 | 0.0102    |
| KLF4     | 1.329  | 0.253  | 0.052  | 0.057  | 0.149  | 5.88E-24  |
| C8orf4   | 1.822  | 0.212  | -0.262 | -0.414 | 0.8    | 8.18E-35  |
| CEP44    | -0.668 | -0.179 | -0.174 | -0.484 | -0.654 | 1.14E-11  |
| BANP     | -1.222 | -0.23  | -0.154 | -0.333 | -0.376 | 4.24E-27  |
| NYAP1    | -0.934 | 0.014  | 0.344  | -0.114 | 0.172  | 2.94E-07  |
| JAK1     | 0.636  | 0.179  | -0.086 | 0.138  | 0.24   | 5.91E-08  |
| BBS10    | -0.922 | -0.319 | -0.217 | -0.265 | -0.592 | 7.04E-34  |
| HYI      | -0.679 | -0.185 | 0.191  | -0.014 | 0.557  | 2.72E-19  |
| SIRT1    | 0.708  | 0.084  | -0.089 | 0.055  | 0.058  | 1.07E-24  |
| TOP2A    | -0.618 | -0.903 | -0.728 | -0.06  | -0.241 | 1.02E-18  |
| JUN      | -1.228 | 0.261  | 0.284  | 0.323  | 1.119  | 9.67E-100 |
| BCL3     | 0.676  | 0.497  | 0.152  | -0.028 | 0.486  | 2.14E-13  |
| JUNB     | 1.358  | 0.862  | 0.048  | -0.017 | 1.115  | 7.01E-57  |
| RASA2    | -0.667 | -0.023 | 0.131  | -0.384 | -0.28  | 3.64E-11  |
| LRRC32   | 0.606  | -0.123 | -0.049 | 0.281  | -0.065 | 9.77E-16  |
| ITPKB    | -0.629 | 0.174  | 0.603  | 0.705  | 1.95   | 1.22E-181 |

|          |        |        |        |        |        |            |
|----------|--------|--------|--------|--------|--------|------------|
| FAM24B   | -0.641 | -0.074 | 0.02   | -0.223 | 0.172  | 0.000577   |
| ACAD10   | -0.601 | -0.043 | 0.343  | -0.069 | 0.036  | 2.06E-12   |
| NPIP4    | -0.56  | -0.404 | -0.051 | -1.197 | -0.896 | 3.62E-15   |
| ITGB8    | -0.633 | 0.507  | 0.404  | 0.26   | 0.449  | 6.64E-19   |
| DNASE1L2 | -0.604 | -0.155 | 0.141  | -0.717 | -1.187 | 5.73E-08   |
| MIR221   | -0.908 | 0.284  | 0.158  | -0.964 | -0.447 | 2.55E-08   |
| DNASE1   | -0.697 | -0.088 | 0.306  | -0.472 | -0.277 | 1.54E-16   |
| RYBP     | 0.728  | 0.094  | -0.131 | 0.064  | 0.329  | 1.01E-26   |
| PGPEP1   | -0.753 | 0.03   | 0.427  | 0.037  | 0.308  | 2E-18      |
| TCF7L2   | 1.162  | 0.07   | 0.158  | 0.365  | 0.462  | 5.76E-35   |
| BEND3    | 0.923  | 0.056  | -0.311 | -0.192 | 0.644  | 1.39E-22   |
| IRAK1BP1 | -0.688 | -0.271 | 0.06   | -0.142 | -0.025 | 0.00353    |
| BUB1B    | -0.606 | -0.783 | -0.771 | -0.304 | -0.575 | 1E-20      |
| BUB1     | -0.659 | -1.189 | -1.047 | -0.361 | -0.228 | 4.73E-54   |
| GALT     | -0.598 | -0.092 | 0.053  | -0.311 | -0.144 | 0.00000102 |
| BTG1     | 0.84   | 0.379  | 0.293  | 0.48   | 1.304  | 3.31E-136  |
| ORC1     | 0.767  | 0.053  | -0.699 | -0.621 | -1.408 | 2.39E-107  |
| UFSP1    | -0.927 | -0.373 | -0.474 | -0.615 | -0.524 | 0.012      |
| PILRB    | -0.778 | -0.16  | 0.08   | -0.926 | -0.743 | 3.09E-13   |
| SGO2     | -0.893 | -1.135 | -1.112 | -0.569 | -0.783 | 3.04E-55   |
| KLF5     | 0.944  | 0.456  | 0.351  | 0.407  | -0.102 | 0.00000154 |
| CENPL    | -0.587 | -0.583 | -0.497 | -0.597 | -1.02  | 7.32E-20   |
| DNMT3B   | -0.979 | -0.722 | -0.62  | -0.747 | -1.208 | 3.3E-16    |
| KIF18A   | -0.895 | -1.408 | -1.215 | -0.465 | -0.355 | 4.41E-54   |
| HOTAIRM1 | -0.629 | -0.342 | 0.107  | -0.587 | -0.272 | 0.000478   |
| BMP4     | -0.653 | -0.086 | -0.581 | -0.489 | -2.128 | 2.91E-102  |
| SERPIN2  | 0.593  | 0.117  | -0.355 | -0.679 | -1.505 | 1.73E-31   |
| VASN     | 0.864  | -0.072 | -0.467 | -0.708 | -0.894 | 1.23E-14   |
| RASSF7   | -0.71  | -0.053 | -0.09  | -0.411 | -0.359 | 4.2E-11    |
| ACBD4    | -0.932 | -0.094 | 0.048  | -0.31  | -0.241 | 3.26E-09   |
| BMP2     | 0.568  | 0.699  | 0.78   | 0.88   | 3.549  | 8.73e-316  |
| BCOR     | 0.966  | -0.26  | 0.188  | 0.352  | 0.517  | 1.71E-18   |
| IRF6     | 0.73   | -0.035 | -0.809 | -0.98  | -2.681 | 4.66E-109  |
| SLC23A3  | -0.598 | 0.174  | 0.788  | -0.402 | -0.184 | 1.36E-10   |
| ANO8     | -0.804 | -0.345 | 0.161  | -0.53  | -0.339 | 3.74E-08   |
| LIPG     | 0.625  | -0.232 | -0.804 | -0.685 | -2.105 | 2.87E-45   |
| HEY1     | 1.199  | -0.237 | -0.721 | -0.516 | -0.154 | 2.78E-23   |
| FRMD3    | 0.769  | 0.125  | -0.075 | 0.078  | 0.479  | 4.42E-12   |

|           |        |        |        |        |        |            |
|-----------|--------|--------|--------|--------|--------|------------|
| CMAHP     | -0.87  | -0.461 | -0.48  | -0.75  | -0.322 | 0.00265    |
| ACAD11    | -0.654 | 0.042  | 0.41   | -0.489 | -0.013 | 0.00000122 |
| DYRK3     | 0.735  | 0.179  | 0.465  | 0.803  | 1.196  | 1.01E-40   |
| ARID5B    | 0.585  | 0.355  | -0.02  | 0.096  | 0.552  | 1E-10      |
| SNORD93   | -0.875 | -0.11  | -0.249 | -0.877 | -1.309 | 0.00000869 |
| SNORA71C  | -1.216 | -0.359 | -0.38  | -1.127 | -1.457 | 3.41E-08   |
| IRF1      | 0.798  | 1.008  | 0.237  | 0.132  | 1.986  | 2.1E-122   |
| P2RY11    | 0.594  | 0.233  | 0.341  | -0.16  | -0.322 | 0.0000251  |
| MYADM     | 0.594  | 0.224  | -0.045 | 0.087  | -0.304 | 1.2E-11    |
| FOSL1     | 0.669  | 0.275  | 0.329  | 0.362  | 0.188  | 1.47E-11   |
| KLF15     | -1.112 | -0.349 | -0.996 | -1.356 | -2.67  | 3.99E-38   |
| RECQL5    | -0.614 | 0.057  | 0.271  | -0.205 | -0.229 | 1.65E-15   |
| TSEN2     | -0.588 | -0.259 | 0.116  | -0.087 | -0.242 | 0.00000363 |
| GATSL3    | -0.93  | -0.343 | -0.539 | -0.427 | -0.266 | 0.00535    |
| C7orf13   | -0.605 | -0.071 | 0.205  | 0.263  | 0.166  | 0.0000128  |
| EMC9      | -0.738 | -0.422 | -0.379 | -0.47  | -0.503 | 7.85E-08   |
| ABCA7     | -1.134 | -0.403 | 0.316  | -0.201 | -0.054 | 3.17E-15   |
| TBX20     | 0.907  | 0.068  | -0.022 | 0.315  | -0.147 | 1.81E-11   |
| SNORA66   | -0.658 | -0.014 | -0.103 | -1.016 | -0.952 | 0.000139   |
| PLD6      | -0.817 | -0.319 | -0.174 | -0.471 | -0.725 | 0.0000374  |
| CABLES1   | 1.364  | -0.244 | 0.391  | 1.104  | 1.559  | 1.5E-93    |
| HIST1H2AC | 0.585  | 0.819  | 1.414  | 1.663  | 1.625  | 2.37E-33   |
| SNORA71A  | -0.738 | -0.134 | -0.138 | -0.669 | -0.959 | 0.00356    |
| ZBTB2     | 0.7    | -0.392 | -0.57  | -0.386 | 0.169  | 9.88E-38   |
| SNORA26   | -0.71  | -0.151 | -0.059 | -0.83  | -0.995 | 0.000326   |
| INSIG1    | 0.824  | -0.269 | -0.567 | -0.514 | 0.749  | 5.49E-133  |
| TLE6      | -0.565 | -0.423 | 0.176  | -0.315 | 0.458  | 0.00001    |
| FZD1      | 0.633  | -0.265 | -0.73  | -0.378 | -0.701 | 1.14E-33   |
| HEY2      | 1.175  | -0.446 | -0.329 | 0.153  | -1.524 | 1.69E-54   |
| GGT5      | -0.713 | -0.279 | 0.032  | 0.086  | -0.592 | 9.76E-11   |
| FZD8      | 0.611  | -0.308 | -0.472 | -0.175 | 1.151  | 6.97E-73   |
| SHROOM3   | 0.664  | 0.15   | 0.655  | 0.891  | 0.976  | 4.94E-22   |
| C19orf44  | -0.727 | 0.107  | 0.135  | -0.045 | -0.125 | 4.67E-07   |
| LCA5      | 0.668  | 0.629  | 0.374  | 0.436  | 0.527  | 2.64E-07   |
| KLHL24    | 1.142  | 0.752  | 0.601  | 0.849  | 1.932  | 1.15E-67   |
| SLC40A1   | 0.789  | 1.33   | 0.341  | -0.448 | -1.44  | 4.88E-119  |
| ZMYM1     | -0.672 | -0.225 | -0.169 | -0.174 | -0.308 | 2.81E-14   |
| MIR126    | -1.12  | -0.38  | -0.499 | -1.52  | -1.718 | 5.51E-26   |



| RN7SL1    | #N/A   | #N/A   | #N/A   | #N/A   | #N/A   | #N/A       |
|-----------|--------|--------|--------|--------|--------|------------|
| PCBP2-OT1 | -0.6   | -0.142 | -0.246 | -0.986 | -0.689 | 0.00822    |
| FNIP2     | 0.645  | 0.057  | -0.035 | 0.08   | -0.069 | 3.01E-24   |
| LONRF3    | 0.734  | -0.021 | 0.139  | -0.031 | -0.364 | 0.00000609 |
| INCENP    | -0.743 | -0.777 | -0.564 | -0.203 | -0.812 | 1.25E-31   |
| TEAD3     | 0.582  | 0.422  | 0.337  | -0.084 | 0.015  | 0.0238     |
| SNORA5C   | -0.894 | -0.115 | -0.09  | -0.706 | -0.744 | 0.000474   |
| RNF19B    | 0.929  | 0.654  | 0.618  | 0.698  | 1.33   | 1.1E-59    |
| GCH1      | 0.896  | 0.433  | -0.13  | -0.283 | -0.335 | 4.54E-27   |
| SNORD55   | -0.664 | -0.389 | -0.296 | -0.927 | -0.312 | 0.0429     |
| NUAK2     | 0.625  | 1.12   | 0.146  | -0.099 | 2.459  | 1.06E-48   |
| HIST1H3E  | 0.719  | 0.915  | 1.46   | 1.163  | 0.967  | 3.98E-08   |
| C7orf61   | -0.723 | -0.687 | -0.087 | 0.145  | 0.961  | 1.56E-09   |
| GIN1      | -0.609 | -0.073 | -0.021 | -0.159 | -0.573 | 4.49E-07   |
| TFAP2A    | 0.985  | 0.717  | -0.376 | -0.773 | -2.085 | 3.66E-46   |
| TRIM59    | -0.771 | -0.695 | -0.419 | -0.285 | -0.429 | 2.01E-15   |
| BCAS3     | 0.673  | 0.17   | 0.14   | 0.626  | 0.877  | 2.62E-09   |
| ZNF367    | 1.046  | 0.002  | -0.52  | -0.583 | -0.774 | 5.37E-163  |
| FSTL3     | 0.62   | 0.269  | 0.345  | 0.394  | 0.45   | 6.46E-22   |
| GATA2     | 0.703  | -0.471 | -0.245 | -0.038 | -0.682 | 2.21E-45   |
| PCDH1     | 0.7    | -0.096 | -0.185 | 0.183  | 0.621  | 4.76E-33   |
| TBC1D3F   | -0.576 | -0.45  | 0.015  | -0.644 | 0.023  | 0.0179     |
| GAS2L3    | -1.475 | -1.35  | -0.892 | -0.564 | 0.117  | 3.39E-65   |
| SNX22     | -0.607 | -0.641 | -1.339 | -1.926 | -3.518 | 8.87E-74   |
| GATA6     | 0.883  | -0.232 | -0.178 | 0.214  | -0.203 | 1.33E-35   |
| GBAP1     | -0.819 | 0.095  | 0.43   | -0.429 | -0.398 | 5.39E-16   |
| OSGIN2    | 0.675  | 0.046  | -0.477 | -0.44  | -0.946 | 3.8E-66    |
| RGPD5     | 0.719  | -0.096 | -0.257 | 0.082  | 0.17   | 0.00771    |
| BORA      | -1.358 | -1.147 | -0.977 | -0.544 | -0.653 | 1.55E-34   |
| CHST3     | 1.008  | -0.221 | -0.188 | -0.088 | -0.158 | 5.81E-32   |
| IL11      | 1.145  | 0.329  | -0.282 | -0.618 | -0.61  | 3.16E-26   |
| KIF15     | -0.67  | -0.46  | -0.327 | -0.156 | -0.99  | 3.81E-32   |
| SCARNA21  | -0.647 | -0.304 | -0.36  | -0.806 | -0.884 | 0.0236     |
| GBX2      | -0.658 | -0.588 | -0.528 | -0.241 | -1.071 | 4.48E-26   |
| ADAMTS9   | -0.612 | -0.227 | 0.215  | 0.286  | -0.131 | 3.22E-25   |
| TGFA      | 0.673  | 0.254  | -0.504 | -0.12  | 0.318  | 1.49E-07   |
| STX3      | 0.803  | 0.147  | 0.071  | 0.138  | 0.383  | 2.63E-51   |
| SMURF1    | 0.622  | 0.239  | 0.117  | 0.062  | 0.664  | 1.4E-41    |

|          |        |        |        |        |        |            |
|----------|--------|--------|--------|--------|--------|------------|
| L3MBTL1  | -0.835 | 0.043  | 0.079  | -0.457 | -0.201 | 0.0000667  |
| ZFPM1    | 1.234  | 0.696  | 0.768  | 0.419  | 0.972  | 5.69E-37   |
| NUDT16   | -0.573 | -0.347 | -0.138 | -0.572 | -0.367 | 0.000113   |
| KIF23    | -0.755 | -0.908 | -0.539 | -0.208 | -0.649 | 9.95E-43   |
| FJX1     | -0.721 | -0.461 | -0.252 | -0.062 | 0.507  | 8.39E-45   |
| EDA      | 0.59   | 0.196  | 0.335  | 0.478  | 0      | 0.00645    |
| NEIL3    | -0.687 | -0.615 | -0.403 | -0.273 | -1.181 | 5.1E-26    |
| C9orf47  | -0.715 | 0.277  | 0.203  | -0.721 | -0.204 | 0.00000413 |
| KCNIP2   | -0.588 | 0.004  | 0.215  | -0.881 | -0.578 | 0.000144   |
| RHPN1    | -1.097 | -0.37  | 0.388  | -0.055 | 0.773  | 6.46E-21   |
| MAD2L1   | -0.577 | -0.549 | -0.569 | -0.729 | -0.826 | 1.27E-08   |
| TSKU     | 1.372  | 0.639  | 0.733  | 0.778  | 1.301  | 1.07E-58   |
| ZNFX1    | 0.795  | 0.448  | 0.508  | 0.479  | 0.982  | 7.21E-41   |
| CROCCP3  | -0.598 | -0.22  | 0.276  | -0.644 | -0.525 | 0.000067   |
| GYPE     | 0.887  | 0.007  | -0.036 | -0.15  | -0.333 | 5.19E-14   |
| DGKE     | -0.587 | -0.208 | -0.1   | -0.744 | -0.633 | 4.6E-08    |
| AURKA    | -1.134 | -1.789 | -1.506 | -0.661 | -0.442 | 4.51E-94   |
| AURKAPS1 | -0.804 | -0.961 | -1.012 | -0.738 | -0.399 | 0.0000212  |
| SMAD6    | 1.094  | -0.3   | -0.888 | -0.984 | -2.077 | 2.94E-30   |
| HOXB-AS1 | -0.667 | -0.136 | 0.147  | -0.896 | -0.607 | 0.00000673 |
| SMAD7    | 1.419  | -0.189 | 0.102  | 0.287  | -0.718 | 1.29E-19   |
| ZMIZ1    | 0.595  | -0.398 | 0.169  | 0.603  | 0.598  | 1.03E-33   |
| SMAD9    | 1.256  | -0.21  | -0.574 | -0.431 | -1.351 | 2.54E-54   |
| ZC3HAV1L | -0.637 | -0.225 | -0.127 | -0.413 | -0.217 | 5.85E-07   |
| PTGIR    | -0.541 | 0.431  | 0.656  | 0.523  | 1.817  | 2.59E-25   |
| NICN1    | -0.667 | -0.197 | 0.208  | -0.217 | 0.138  | 1.2E-08    |
| ENGASE   | -0.643 | -0.018 | -0.153 | -0.686 | -0.445 | 4.07E-13   |
| APOLD1   | -0.643 | -0.147 | -0.197 | -0.166 | -0.004 | 0.0178     |
| MSH6     | 0.714  | -0.05  | -0.582 | -0.441 | -0.294 | 8.13E-33   |
| PTGS2    | 2.054  | 0.236  | -0.45  | -0.748 | -1.219 | 6.74E-114  |
| MFSD3    | -0.698 | -0.14  | -0.184 | -0.296 | 0.606  | 1.17E-18   |
| CCDC14   | -0.585 | -0.033 | 0.077  | -0.714 | -0.758 | 2.26E-13   |
| CCDC191  | -0.741 | 0.1    | 0.481  | -0.015 | 0.301  | 3.99E-07   |
| MIR155HG | -0.578 | -0.19  | -0.189 | -0.837 | -0.724 | 0.0000832  |
| SYCE1L   | -0.596 | -0.175 | 0.037  | -0.527 | 0.312  | 0.00021    |
| AEN      | 0.911  | 0.583  | 0.709  | 0.44   | 0.787  | 2.13E-57   |
| POLQ     | -0.622 | -0.219 | -0.261 | -0.638 | -0.935 | 1.51E-26   |
| MTHFSD   | -0.586 | -0.001 | 0.162  | -0.199 | -0.274 | 7.94E-16   |

|            |        |        |        |        |        |           |
|------------|--------|--------|--------|--------|--------|-----------|
| TMEM79     | -0.699 | 0.064  | -0.106 | -0.696 | -0.832 | 2.53E-21  |
| ARHGAP21   | 1.061  | 0.392  | 0.242  | 0.292  | 0.537  | 6.95E-35  |
| TCTEX1D1   | -0.619 | 0.195  | 0.362  | -0.246 | 0.133  | 4.65E-14  |
| PPP1R12B   | -0.731 | 0.02   | 0.198  | -0.598 | -0.696 | 3.89E-18  |
| ZNF654     | 0.821  | 0.518  | 0.358  | 0.004  | 0.347  | 5.07E-25  |
| GDF15      | 1.882  | 2.126  | 1.776  | 1.622  | 1.959  | 1.34E-121 |
| E2F2       | 0.741  | -0.278 | -0.795 | -1.422 | -1.942 | 1.42E-158 |
| LITAF      | 0.616  | 0.473  | 0.359  | 0.375  | 0.312  | 0.0254    |
| CDK10      | -0.595 | -0.101 | 0.02   | -0.735 | -0.752 | 4.58E-17  |
| CTC-338M12 | -0.636 | -0.26  | -0.01  | -0.459 | -0.599 | 0.000616  |
| ADAMTS1    | 0.866  | 0.112  | -0.507 | -0.557 | -1.86  | 3.56E-143 |
| ZNF248     | -0.819 | 0.033  | -0.058 | -0.622 | -0.493 | 3.31E-16  |
| MIR421     | -0.541 | -0.123 | -0.134 | -0.357 | -0.64  | 0.0383    |
| ZNF397     | -0.661 | -0.065 | 0.028  | -0.414 | -0.647 | 5.2E-10   |
| TAF4B      | 0.857  | 1.061  | 0.939  | 0.585  | 0.693  | 3.1E-11   |
| PGM5P2     | -0.87  | -0.234 | 0.582  | -0.263 | 0.093  | 1.4E-08   |
| DUSP6      | -1.143 | -0.118 | -0.237 | -0.331 | -0.209 | 1.42E-55  |
| APPL2      | 0.601  | 0.002  | -0.001 | 0.018  | 0.202  | 4.6E-12   |
| LBH        | 0.853  | 0.35   | 0.043  | 0.225  | 0.525  | 0.0168    |
| FAM83D     | -1.6   | -1.591 | -1.24  | -0.48  | -0.391 | 1.53E-90  |
| CCNB1      | -0.946 | -1.877 | -1.593 | -0.76  | -0.194 | 2.59E-123 |
| FBXO32     | 1.149  | 0.772  | 1.066  | 1.284  | 2.27   | 4.21E-44  |
| E2F7       | 0.809  | 0.559  | 0.455  | 0.028  | 0.696  | 1.42E-43  |
| MIR647     | -0.852 | -0.166 | -0.242 | -1.225 | -0.962 | 1.69E-07  |
| TIGAR      | 0.865  | 0.987  | 0.819  | 0.767  | 0.984  | 7.17E-64  |
| ZBTB8A     | 1.181  | 0.172  | 0.122  | 0.19   | 0.376  | 2.34E-24  |
| BTG2       | 2.559  | 1.562  | 1.677  | 1.436  | 2.108  | 8.18E-258 |
| CYP2R1     | -0.841 | -0.162 | 0.176  | -0.227 | -0.486 | 3.8E-13   |
| CBFB       | 0.6    | -0.106 | -0.314 | -0.18  | -0.159 | 4.49E-31  |
| HBEGF      | 0.67   | 0.57   | 0.385  | 0.402  | 0.754  | 7.6E-32   |
| CDT1       | 0.617  | 0.004  | -0.305 | -0.336 | -0.293 | 4.08E-24  |
| SAV1       | 1.106  | 0.424  | 0.011  | 0.147  | 0.294  | 3.06E-51  |
| MIR34AHG   | 0.885  | 0.856  | 1.141  | -0.114 | 0.358  | 8.93E-17  |
| CBS        | -0.666 | -0.19  | -0.467 | 0.239  | 0.035  | 0.000423  |
| CUL9       | -0.643 | -0.087 | 0.156  | -0.407 | -0.477 | 1.79E-21  |
| PRRT2      | -0.865 | -0.444 | -0.148 | -0.83  | -0.292 | 0.000342  |
| KLF11      | 0.812  | 0.14   | 0.16   | 0.503  | 0.632  | 3.48E-14  |
| DNAAF2     | -0.588 | -0.481 | -0.241 | -0.104 | 0.055  | 2.93E-08  |

|            |        |        |        |        |        |            |
|------------|--------|--------|--------|--------|--------|------------|
| TSC22D4    | -0.676 | -0.149 | -0.024 | -0.145 | 0.043  | 1.98E-18   |
| SERTAD1    | 1.176  | 0.234  | 0.247  | 0.268  | -0.032 | 9.42E-76   |
| FARS2      | 0.612  | -0.062 | -0.102 | 0.516  | 0.298  | 3.48E-09   |
| ANKH       | 0.691  | 0.1    | -0.371 | -0.27  | -0.232 | 1.45E-29   |
| PIK3R3     | 0.795  | -0.05  | -0.054 | 0.308  | 0.147  | 1.22E-27   |
| ENC1       | 1.274  | -0.042 | 0.222  | 0.274  | 1.128  | 3.08E-63   |
| GPSM2      | -1.081 | -1.468 | -0.869 | -0.259 | 0.083  | 6.44E-55   |
| CDPF1      | -0.588 | -0.124 | -0.188 | -0.401 | -0.687 | 7.4E-11    |
| FBF1       | -0.765 | 0.097  | 0.236  | -0.37  | -0.544 | 5.51E-19   |
| MAPK8IP3   | -0.647 | -0.067 | -0.058 | -1.02  | -0.61  | 1.54E-15   |
| RUNX1T1    | 0.886  | -0.443 | -0.598 | -0.424 | -0.423 | 3.61E-47   |
| DPYSL3     | 0.571  | 0.037  | -0.382 | -0.339 | -0.649 | 5.3E-23    |
| LIF        | 1.374  | 1.709  | 1.827  | 0.972  | 2.039  | 4.91E-15   |
| SOX13      | 0.6    | -0.428 | -0.058 | -0.124 | -0.452 | 2.26E-42   |
| ANKLE1     | -0.702 | -0.278 | -0.317 | -0.815 | -0.716 | 8.11E-12   |
| GEMIN2     | -0.604 | -0.26  | -0.174 | -0.561 | -0.966 | 7.17E-14   |
| FRMD4B     | 0.69   | -0.081 | -0.046 | 0.159  | 0.578  | 1.11E-33   |
| MTRNR2L8   | -0.839 | -0.512 | -0.276 | -1.538 | -0.947 | 1.54E-07   |
| NR1D1      | -0.828 | 0.081  | 0.294  | 0.379  | 0.148  | 3.36E-09   |
| NABP1      | -0.734 | 0.409  | 0.403  | -0.574 | -0.652 | 3.23E-26   |
| SMIM8      | -0.603 | -0.094 | -0.285 | -0.528 | -0.506 | 0.00142    |
| PPM1D      | 1.464  | 0.785  | 0.634  | 0.457  | 0.875  | 4E-114     |
| NEK2       | -0.927 | -1.25  | -1.247 | -0.428 | -0.03  | 1.42E-45   |
| ZC3H12C    | 0.981  | 0.48   | 0.379  | 0.326  | 0.853  | 1.33E-44   |
| CCDC36     | -0.794 | -0.557 | -0.23  | -0.391 | -0.396 | 0.00000537 |
| LDLR       | 0.724  | -0.516 | -1.141 | -1.126 | 0.122  | 1.74E-118  |
| SPIN3      | -0.677 | 0.138  | 0.145  | -0.367 | 0.1    | 3.96E-07   |
| STOM       | 0.761  | 0.881  | 0.723  | 0.797  | 0.711  | 5.73E-63   |
| GPR37      | 0.83   | 0.095  | 0.014  | 0.265  | 0.153  | 6.97E-18   |
| PRDM15     | -0.77  | 0.311  | 0.241  | -0.239 | -0.347 | 1.35E-23   |
| GDPD1      | -0.95  | 0.164  | -0.018 | -0.328 | -0.029 | 0.00000716 |
| ZNF251     | -0.775 | -0.271 | 0.062  | -0.567 | -0.068 | 1.22E-08   |
| KLHL35     | -0.774 | -0.107 | 0.194  | 0.243  | 0.174  | 0.000334   |
| MIR3191    | 0.909  | 1.228  | 1.391  | 0.48   | 0.84   | 0.00000104 |
| GNA14      | 0.755  | -0.188 | 0.083  | 0.437  | 0.266  | 0.000921   |
| NEDD9      | 0.619  | 0.197  | -0.015 | -0.06  | 0.242  | 5.62E-11   |
| PLEKHJ1    | -0.634 | -0.342 | -0.42  | -0.747 | -0.69  | 5.77E-23   |
| ST3GAL4-AS | -0.839 | -0.363 | 0.355  | 0.032  | 0.478  | 1.46E-15   |

|            |        |        |        |        |        |            |
|------------|--------|--------|--------|--------|--------|------------|
| LURAP1L    | -0.905 | -0.049 | 0.119  | 0.358  | 1.22   | 2.2E-27    |
| MYEF2      | -0.643 | -0.191 | 0.266  | 0.167  | 0.7    | 7.17E-34   |
| ATP8B3     | -0.938 | -0.566 | -0.295 | -0.579 | -0.684 | 0.00000485 |
| TACC2      | 0.689  | -0.202 | 0.336  | 0.762  | 1.203  | 2.14E-74   |
| SOX4       | 0.683  | 0.271  | 0.876  | 1.285  | 2.219  | 1.62E-93   |
| C11orf96   | 1.024  | -0.122 | 0.038  | 0.381  | 0.954  | 0.00000136 |
| C3orf67    | 0.687  | 1.4    | 1.49   | 1.296  | 1.099  | 2.67E-18   |
| LFNG       | 1.201  | -0.621 | -0.234 | -0.285 | 0.611  | 5.23E-65   |
| MIRLET7BH  | -0.611 | -0.278 | -0.395 | -0.962 | -1.009 | 2.48E-10   |
| RIN1       | -0.77  | -0.603 | -0.155 | -0.288 | -0.623 | 3.17E-10   |
| KCNMB3     | -0.918 | -0.356 | -0.204 | -0.754 | -0.569 | 0.0031     |
| PDE7B      | -0.799 | -0.346 | -0.117 | 0.059  | 0.247  | 2.77E-29   |
| METRNL     | 0.813  | 0.055  | 0.05   | 0.435  | 0.329  | 1.77E-16   |
| PTP4A1     | 0.659  | 0.472  | 0.286  | 0.307  | 0.285  | 1.8E-25    |
| TRIM69     | -0.781 | -0.158 | 0.043  | 0.009  | -0.048 | 0.000124   |
| BBC3       | 2.09   | 1.701  | 1.827  | 1.627  | 2.389  | 1.64E-89   |
| ELF4       | 0.74   | -0.002 | 0.014  | 0.238  | 0.497  | 1.37E-26   |
| NFE2L2     | 0.64   | 0.239  | 0.035  | 0.214  | 0.072  | 3.57E-14   |
| NFATC1     | 0.786  | 0.188  | 0.089  | 0.23   | 0.165  | 7.52E-13   |
| EML1       | 0.588  | -0.204 | -0.421 | 0.043  | 0.186  | 5.13E-32   |
| NFATC2     | 0.762  | 0.812  | 1.642  | 1.81   | 2.853  | 3.94E-75   |
| LUZP1      | 0.598  | 0.146  | 0.199  | 0.442  | 0.827  | 1.95E-25   |
| SAMD10     | -0.851 | -0.114 | 0.058  | 0.076  | 0.544  | 1.99E-13   |
| HEXIM1     | 0.642  | 0.144  | -0.148 | 0.122  | 0.094  | 1.05E-07   |
| MAP3K12    | -0.865 | -0.317 | -0.059 | -0.528 | -0.128 | 3.74E-18   |
| IFFO1      | -0.881 | -0.398 | -0.155 | -0.634 | -0.274 | 5.84E-10   |
| CDCA8      | -0.947 | -1.042 | -0.95  | -0.391 | -0.772 | 3.67E-44   |
| C21orf58   | -1.153 | -0.349 | -0.187 | -0.577 | -0.891 | 5.61E-24   |
| SENP7      | -0.757 | -0.248 | -0.032 | -0.485 | -0.541 | 1.74E-11   |
| IQCJ-SCHIP | 1.065  | 0.489  | 0.649  | 0.771  | 1.589  | 2.87E-40   |
| ANKRD13D   | -0.725 | -0.226 | -0.14  | -0.729 | -0.47  | 5.81E-13   |
| NFKBIA     | 1.116  | 0.659  | 0.216  | 0.081  | 0.853  | 1.35E-64   |
| SLC30A1    | 0.992  | 0.397  | 0.383  | 0.328  | 0.642  | 1.05E-42   |
| DHRS1      | -0.728 | 0.015  | 0.118  | -0.12  | 0.529  | 2.79E-17   |
| CCNF       | -1.291 | -0.895 | -0.695 | -0.403 | -0.903 | 5.32E-65   |
| CCNE1      | 0.606  | -0.068 | -0.611 | -1.211 | -1.268 | 2.21E-90   |
| ELF1       | 0.581  | 0.093  | 0.017  | 0.316  | 0.246  | 3.15E-13   |
| KBTBD2     | 0.596  | 0.042  | -0.022 | 0.035  | -0.114 | 8.96E-37   |

|          |        |        |        |        |        |            |
|----------|--------|--------|--------|--------|--------|------------|
| C1orf74  | 0.597  | 0.135  | -0.223 | -0.195 | -0.74  | 1.55E-24   |
| ANKRD12  | 0.639  | 0.267  | 0.017  | -0.134 | -0.047 | 3.9E-28    |
| CXCL2    | 0.752  | 0.74   | -0.022 | -1.092 | 0.756  | 3.55E-36   |
| CXCL3    | 0.966  | 0.711  | -0.194 | -0.468 | 0.981  | 1.31E-18   |
| SNORD83A | -0.64  | 0.087  | -0.144 | -0.926 | -0.797 | 0.0000141  |
| MTCL1    | 0.633  | -0.193 | -0.262 | -0.597 | -0.804 | 1.1E-47    |
| NKX3-1   | 0.943  | 0.61   | 0.354  | 0.398  | 0.908  | 0.0000614  |
| EGR1     | -0.777 | -0.185 | -1.158 | -1.788 | -1.733 | 4.54E-23   |
| MEGF6    | -0.614 | 0.001  | 0.473  | 0.203  | 1.079  | 4.19E-39   |
| TUBGCP6  | -0.634 | 0.079  | 0.198  | -0.648 | -0.763 | 2.28E-21   |
| CHTF18   | -0.621 | -0.03  | -0.195 | -0.953 | -1.406 | 1.45E-30   |
| METTL23  | -0.628 | -0.223 | 0.079  | 0.043  | -0.106 | 3.23E-10   |
| ZBED8    | -0.742 | -0.107 | -0.111 | -0.257 | -0.543 | 0.0000378  |
| CDC25A   | 0.825  | -0.142 | -0.686 | -0.819 | -0.874 | 1.52E-134  |
| SNORD14D | -0.778 | -0.495 | -0.579 | -1.267 | -1.467 | 1.43E-07   |
| ARC      | 0.638  | 0.405  | 0.592  | 0.415  | 0.665  | 7.61E-07   |
| SNORD14E | -0.599 | -0.513 | -0.381 | -1.672 | -1.059 | 5.42E-09   |
| PINLYP   | -0.855 | 0.241  | 0.416  | -0.328 | -0.214 | 0.0000011  |
| GDF7     | -0.637 | 0.563  | 0.428  | -0.006 | 0.22   | 1.34E-12   |
| TBC1D3H  | -0.726 | 0.023  | 0.098  | -0.826 | -0.595 | 0.00204    |
| SCARF1   | -0.641 | -0.245 | 0.109  | -0.008 | 0.412  | 6.86E-34   |
| PTPRCAP  | -0.782 | 0.156  | 0.065  | -0.747 | -0.689 | 0.00000802 |
| SNORD14C | -0.575 | -0.396 | -0.354 | -1.193 | -1.521 | 6.66E-09   |
| EFNA1    | -0.686 | 0.125  | 0.259  | 0.204  | 1.464  | 2.12E-34   |
| ANKS1A   | -0.8   | -0.465 | -0.047 | -0.021 | -0.145 | 3.64E-15   |
| KRT7     | 0.655  | 0.023  | -0.243 | 0.074  | 0.971  | 5.88E-23   |
| CDC6     | 0.76   | 0.119  | -0.487 | -0.553 | -1.115 | 1.05E-111  |
| ANKRD36C | -0.767 | -0.144 | 0.154  | -0.965 | -1.632 | 2.82E-13   |
| CDC20    | -0.911 | -1.817 | -1.549 | -0.721 | -0.673 | 2.01E-69   |
| C12orf60 | -0.784 | -0.03  | -0.172 | -0.627 | -1.061 | 6.13E-09   |
| CDK1     | -0.58  | -0.475 | -0.509 | -0.371 | -0.709 | 4.6E-16    |
| ESPL1    | -0.963 | -0.673 | -0.507 | -0.599 | -1.448 | 6.14E-68   |
| RHPN2    | 0.632  | 0.341  | 0.069  | 0.052  | 0.521  | 0.00000822 |
| ZMAT1    | -0.76  | -0.034 | 0.398  | -0.173 | 0.133  | 0.00000182 |
| NEURL4   | -0.654 | -0.14  | -0.114 | -0.713 | -0.742 | 1.08E-20   |
| FAM111A  | -0.642 | 0.036  | 0.19   | -0.322 | -0.796 | 2.5E-25    |
| ZNF512   | -0.588 | -0.128 | 0.077  | -0.034 | 0.15   | 1.68E-22   |
| ZNF366   | -1.302 | -0.708 | -0.363 | 0.03   | 0.161  | 8.18E-14   |

|           |        |        |        |        |        |            |
|-----------|--------|--------|--------|--------|--------|------------|
| SEC31B    | -0.798 | -0.096 | 0.196  | -0.731 | -0.069 | 2.14E-10   |
| PLPP3     | 0.867  | -0.009 | -0.445 | 0.031  | -0.144 | 2.41E-57   |
| DHX34     | -0.691 | -0.195 | -0.085 | -0.461 | -0.648 | 1.45E-32   |
| NR3C1     | 1.286  | 0.026  | -0.094 | 0.355  | 0.108  | 4.86E-42   |
| SH2D4A    | 0.62   | -0.219 | 0.028  | 0.414  | 0.928  | 0.00000802 |
| PDCD1LG2  | -0.207 | 0.191  | 0.421  | 0.708  | 0.816  | 3.19E-56   |
| HES1      | 0.026  | 0.061  | 0.706  | 0.57   | 0.977  | 1.17E-09   |
| MB21D2    | 0.074  | 0.117  | 0.406  | 1.078  | 1.866  | 1.47E-93   |
| STK32B    | 0.282  | 0.447  | 0.995  | 1.338  | 2.053  | 8.89E-182  |
| HSD17B4   | 0.409  | 0.231  | 0.228  | 0.619  | 0.491  | 0.0000581  |
| HSPA4L    | 0.554  | 1.116  | 1.236  | 1.591  | 1.511  | 7.21E-41   |
| HRH1      | 0.512  | 0.166  | 0.451  | 0.597  | 0.973  | 3.78E-41   |
| PTK2B     | 0.15   | 0.131  | 0.417  | 0.597  | 0.322  | 9.49E-07   |
| AK5       | 0.208  | -0.055 | 0.115  | 0.612  | 0.206  | 0.0000012  |
| ABAT      | 0.323  | 0.058  | 0.231  | 0.616  | 0.53   | 0.00232    |
| ABCA3     | -0.18  | -0.116 | 0.324  | 0.644  | 1.043  | 2.91E-32   |
| ACSS1     | -0.199 | 0.474  | 1.176  | 0.905  | 1.943  | 7.24E-44   |
| CES2      | 0.419  | 0.687  | 0.776  | 0.872  | 0.87   | 2.85E-45   |
| DRAM1     | 0.496  | 0.827  | 0.768  | 0.823  | 1.238  | 1.02E-105  |
| BBS9      | 0.492  | 0.137  | 0.088  | 0.754  | 0.609  | 1.49E-11   |
| TBC1D5    | 0.488  | 0.061  | 0.224  | 0.778  | 1.184  | 2.55E-54   |
| PLEKHF1   | -0.493 | 0.261  | 0.319  | 0.636  | 0.867  | 6.98E-11   |
| ASCC3     | 0.318  | 0.859  | 0.795  | 1.138  | 1.211  | 9.55E-31   |
| PARP9     | 0.05   | 0.219  | 0.478  | 0.856  | 1.242  | 6.8E-45    |
| HDAC9     | -0.055 | 0.766  | 0.563  | 0.599  | 0.986  | 2.11E-23   |
| HSP90AA1  | 0.401  | 0.197  | 0.122  | 0.605  | 0.585  | 3.19E-07   |
| CABYR     | 0.359  | 0.873  | 0.859  | 0.954  | 1.769  | 1.39E-19   |
| ACO1      | 0.27   | 0.132  | 0.104  | 0.585  | 0.791  | 2E-10      |
| NTN4      | 0.172  | 0.378  | 0.647  | 1.131  | 1.541  | 3.68E-72   |
| ULBP1     | 0.503  | 0.92   | 0.93   | 1.013  | 0.342  | 0.00000103 |
| FAM167A   | 0.49   | 0.272  | 0.868  | 1.615  | 0.866  | 2.91E-21   |
| TNFRSF10C | 0.313  | 1.014  | 1.167  | 1.334  | 1.729  | 4.73E-70   |
| SLC9A1    | 0.528  | 0.908  | 0.867  | 0.988  | 1.394  | 3.18E-53   |
| EHD1      | 0.487  | 0.232  | 0.477  | 0.945  | 1.364  | 9.51E-36   |
| PDGFD     | 0.017  | -0.018 | 0.198  | 0.587  | 1.206  | 1.34E-17   |
| POLH      | 0.533  | 0.628  | 0.621  | 0.578  | 0.553  | 7.7E-21    |
| FGF5      | -0.048 | 0.47   | 0.41   | 0.658  | 0.636  | 1.97E-27   |
| TNFRSF14  | -0.287 | 0.599  | 1.079  | 0.845  | 1.149  | 2.24E-57   |

|          |        |        |       |       |       |            |
|----------|--------|--------|-------|-------|-------|------------|
| ELMO1    | 0.226  | 0.224  | 0.332 | 0.87  | 1.701 | 1.72E-84   |
| GDF6     | 0.053  | 0.672  | 0.721 | 0.611 | 1.424 | 2.3E-17    |
| ACKR4    | -0.026 | 0.82   | 0.805 | 1.012 | 1.344 | 1.72E-09   |
| SMARCA1  | 0.312  | 0.262  | 0.146 | 0.565 | 1.012 | 8.05E-13   |
| IL4I1    | -0.032 | 0.639  | 0.856 | 1.265 | 2.175 | 2.55E-54   |
| PALD1    | -0.374 | -0.136 | 1.057 | 1.139 | 2.584 | 4.18E-74   |
| NLGN1    | 0.291  | 0.011  | 0.241 | 0.604 | 0.923 | 9.82E-16   |
| SLCO3A1  | 0.27   | 0.303  | 0.463 | 0.613 | 0.893 | 5.85E-07   |
| ZBTB38   | 0.33   | 0.259  | 0.41  | 0.743 | 0.834 | 8.61E-24   |
| MOB3A    | -0.025 | 0.134  | 0.373 | 0.631 | 0.627 | 6.5E-13    |
| PLEKHA6  | -0.018 | 0.344  | 1     | 0.988 | 1.227 | 5.01E-41   |
| MYO1B    | 0.224  | 0.134  | 0.365 | 0.68  | 1.833 | 1.53E-193  |
| FHL2     | 0.51   | 0.622  | 0.945 | 1.254 | 1.669 | 4.26E-109  |
| ADD3     | 0.071  | 0.175  | 0.409 | 0.655 | 1.583 | 1.72E-60   |
| DGAT2    | -0.424 | -0.484 | 0.36  | 0.764 | 1.905 | 2.42E-51   |
| AFAP1L1  | 0.078  | -0.027 | 0.406 | 0.609 | 1.373 | 8.4E-99    |
| ADPRH    | 0.406  | 0.283  | 0.384 | 0.66  | 0.975 | 3.52E-09   |
| PARP4    | 0.233  | -0.003 | 0.207 | 0.588 | 0.924 | 1.07E-30   |
| NBAS     | 0.208  | 0.101  | 0.246 | 0.664 | 1.396 | 2.48E-78   |
| FIG4     | 0.044  | 0.226  | 0.391 | 0.755 | 0.998 | 2.6E-44    |
| HMGCL    | 0.185  | 0.239  | 0.375 | 0.744 | 0.659 | 2.49E-20   |
| ADRB2    | 0.056  | 0.603  | 0.74  | 0.669 | 0.233 | 1.84E-25   |
| MAP2K3   | 0.474  | 0.289  | 0.361 | 0.606 | 1.049 | 5.27E-30   |
| MAP2K5   | 0.066  | 0.164  | 0.327 | 0.62  | 0.566 | 4.02E-11   |
| MR1      | 0.075  | 0.36   | 0.422 | 0.722 | 0.663 | 4E-15      |
| IRF2BPL  | 0.328  | 0.361  | 0.465 | 0.692 | 0.742 | 6.64E-11   |
| EPRS     | 0.399  | 0.184  | 0.07  | 0.56  | 0.312 | 0.000862   |
| AK9      | -0.137 | 0.011  | 0.435 | 0.58  | 0.988 | 1.95E-13   |
| TUBB6    | 0.453  | 0.23   | 0.198 | 0.677 | 0.465 | 1.66E-08   |
| TTC30B   | -0.204 | 0.204  | 0.244 | 0.641 | 0.351 | 0.00224    |
| APOBEC3C | 0.493  | 0.593  | 0.921 | 1.546 | 2.745 | 4.02E-91   |
| SDSL     | 0.151  | 0.009  | 0.11  | 0.599 | 0.247 | 0.00000117 |
| CCDC69   | 0.074  | 0.18   | 0.398 | 0.674 | 1.399 | 1.36E-55   |
| PRKAR1B  | 0.272  | 0.019  | 0.549 | 1.018 | 1.218 | 1.75E-31   |
| SLC22A23 | 0.364  | 0.661  | 1.375 | 1.269 | 0.883 | 3.85E-21   |
| CYTL1    | 0.082  | 0.555  | 0.97  | 1.053 | 2.515 | 5.66E-198  |
| FAXDC2   | -0.137 | 0.136  | 0.526 | 0.903 | 2.254 | 5.91E-26   |
| HIC1     | 0.286  | 0.31   | 1.019 | 0.828 | 3.179 | 1.56E-157  |



|          |        |        |        |       |       |            |
|----------|--------|--------|--------|-------|-------|------------|
| MGARP    | 0.232  | 0.944  | 0.672  | 1.084 | 1.216 | 0.00000223 |
| STARD10  | -0.102 | 0.268  | 0.645  | 0.615 | 1.224 | 4.75E-35   |
| NOXA1    | -0.399 | 0.059  | 0.912  | 0.574 | 0.726 | 0.00000232 |
| TNFSF15  | -0.336 | 0.56   | 1.691  | 2.056 | 5.46  | 4.85E-267  |
| CPNE3    | 0.27   | 0.114  | 0.149  | 0.585 | 0.83  | 1.7E-23    |
| IFIH1    | -0.001 | 1.033  | 0.909  | 1.054 | 2.07  | 2.14E-38   |
| DOPEY2   | 0.074  | 0.317  | 0.474  | 0.822 | 1.071 | 4.12E-21   |
| PHGDH    | 0.062  | -0.015 | 0.119  | 0.706 | 0.739 | 2.47E-10   |
| UBALD2   | -0.054 | -0.001 | 0.268  | 0.596 | 1.333 | 1.21E-65   |
| CARD6    | 0.435  | 0.353  | 0.334  | 0.656 | 0.762 | 1.1E-18    |
| ALDH3A2  | 0.546  | 0.73   | 0.832  | 1.145 | 0.739 | 2.47E-63   |
| TRAF3IP2 | -0.336 | -0.164 | 0.344  | 0.873 | 1.162 | 9.36E-48   |
| FAM129A  | 0.26   | 0.57   | 0.669  | 1.187 | 1.469 | 1.6E-24    |
| NLRC3    | 0.547  | -0.32  | 0.53   | 0.836 | 1.718 | 1.27E-48   |
| CMBL     | 0.433  | 0.866  | 1.417  | 1.776 | 2.558 | 8.48E-166  |
| RINL     | -0.078 | 0.159  | 0.741  | 1.032 | 0.969 | 1.78E-23   |
| TSC22D1  | 0.426  | 0.323  | 0.412  | 0.657 | 0.92  | 1.42E-52   |
| RASSF4   | -0.337 | 0.192  | 0.641  | 0.636 | 1.271 | 2.55E-27   |
| TOM1L1   | 0.124  | 0.462  | 0.365  | 0.652 | 0.928 | 0.000173   |
| CLDN1    | 0.386  | 1.205  | 1.394  | 1.628 | 2.315 | 5.83E-36   |
| PCED1B   | 0.073  | 0.155  | -0.003 | 0.583 | 0.83  | 0.000797   |
| FERMT1   | 0.443  | 0.122  | 0.044  | 0.629 | 0.875 | 3.61E-11   |
| FILIP1L  | 0.351  | 0.216  | 0.332  | 0.792 | 1.486 | 3.17E-85   |
| SLC7A7   | -0.255 | 0.158  | 0.641  | 1.058 | 1.959 | 1.41E-197  |
| PHACTR1  | 0.161  | -0.515 | 0.498  | 0.771 | 1.209 | 9.56E-76   |
| MBP      | -0.024 | 0.244  | 1.004  | 1.693 | 2.13  | 9.1E-32    |
| CPA4     | -0.055 | 0.71   | 0.918  | 0.955 | 0.631 | 1.66E-16   |
| DDX60    | -0.097 | 0.009  | 0.407  | 0.641 | 1.054 | 2.15E-27   |
| ANXA4    | 0.317  | 0.313  | 0.435  | 0.697 | 1.369 | 2.92E-96   |
| SIRPB2   | -0.019 | -0.338 | 0.235  | 0.647 | 3.373 | 7.12E-161  |
| IL1A     | 0.258  | 0.519  | 1.256  | 1.02  | 3.087 | 3.61E-134  |
| SH2D2A   | 0.23   | 0.444  | 0.93   | 1.309 | 2.47  | 3.98E-54   |
| GATB     | 0.257  | 0.228  | 0.242  | 0.602 | 0.503 | 1.46E-08   |
| GALNT15  | -0.241 | 0.044  | 1.002  | 1.283 | 1.395 | 3.76E-28   |
| PSTPIP2  | 0.364  | 1.105  | 1.009  | 1.036 | 1.341 | 1.86E-70   |
| CCDC85C  | -0.226 | -0.548 | 0.141  | 0.641 | 1.661 | 1.56E-146  |
| GPRC5A   | 0.319  | 0.09   | 0.436  | 0.758 | 0.347 | 2.26E-13   |
| AOX1     | 0.055  | -0.018 | 0.191  | 0.903 | 2.374 | 1.89E-182  |

|           |        |        |        |       |        |            |
|-----------|--------|--------|--------|-------|--------|------------|
| ANK3      | 0.327  | -0.149 | 0.201  | 0.63  | 0.888  | 1.21E-22   |
| CREBL2    | 0.128  | 0.193  | 0.363  | 0.63  | 0.681  | 9.16E-35   |
| GALNT6    | 0.195  | 0.077  | 0.296  | 0.705 | 2.073  | 1.76E-138  |
| CREM      | -0.092 | 0.319  | 0.62   | 0.592 | 0.69   | 2.83E-21   |
| GTF2IRD2B | 0.524  | 0.199  | 0.591  | 0.686 | 1.386  | 1.92E-10   |
| CCRL2     | -0.507 | -0.069 | 0.603  | 0.868 | 0.551  | 7.77E-39   |
| TMCO4     | 0.037  | -0.124 | 0.327  | 0.589 | 0.773  | 3.38E-09   |
| SECTM1    | 0.012  | 0.229  | 0.512  | 0.961 | 1.437  | 3.36E-12   |
| RAD50     | 0.039  | 0.119  | 0.198  | 0.581 | 0.404  | 0.000118   |
| UCP2      | -0.179 | 0.376  | 0.55   | 1.131 | 0.682  | 1.26E-15   |
| PCDH12    | -0.206 | 0.335  | 1.142  | 1.527 | 3.511  | 5.5E-290   |
| COL17A1   | 0.015  | 0.148  | 0.705  | 0.634 | 2.376  | 4.37E-57   |
| PDGFA     | 0.523  | 0.332  | 0.554  | 0.584 | 0.337  | 9.45E-16   |
| SDHA      | 0.253  | 0.198  | 0.196  | 0.68  | 0.298  | 0.00000139 |
| TSPAN1    | 0.153  | 0.231  | 0.817  | 0.798 | 1.037  | 0.00000126 |
| APOD      | 0.28   | 0.737  | 0.982  | 1.319 | 1.961  | 4.04E-39   |
| FAM107A   | 0.104  | 0.144  | 0.225  | 0.68  | 0.418  | 4.14E-09   |
| PDGFRL    | 0.056  | 0.087  | 0.302  | 0.665 | 1.186  | 7.9E-33    |
| SDC1      | 0.418  | 1.19   | 1.271  | 1.696 | 2.248  | 1.38E-52   |
| C1RL      | -0.094 | 0.079  | 0.273  | 0.58  | 0.744  | 8.97E-24   |
| CXCL5     | 0.026  | 0.853  | 0.856  | 0.919 | 2.548  | 2.32E-43   |
| FUCA1     | 0.148  | 0.56   | 0.735  | 0.95  | 1.594  | 2.81E-48   |
| APLP1     | 0.264  | 0.528  | 0.481  | 0.905 | 0.726  | 1.04E-10   |
| DDX58     | -0.224 | 0.658  | 0.692  | 0.925 | 1.947  | 6.32E-181  |
| MCC       | 0.235  | 0.077  | 0.231  | 0.639 | 1.098  | 2.5E-56    |
| CROT      | -0.057 | 0.643  | 0.603  | 0.592 | 0.671  | 4.64E-19   |
| PCSK1     | -0.04  | -0.133 | -0.149 | 0.657 | 1.032  | 6.32E-12   |
| TMEM173   | 0.237  | 0.369  | 0.548  | 0.608 | 0.411  | 1.25E-27   |
| STAP2     | -0.138 | 0.39   | 0.919  | 0.727 | 2.356  | 8.58E-53   |
| STPG1     | 0.068  | 0.067  | 0.422  | 0.62  | 0.438  | 0.00000149 |
| TYMS      | 0.32   | 0.44   | 0.386  | 0.601 | 0.305  | 2.02E-16   |
| RSPH3     | 0.246  | 0.463  | 0.485  | 0.803 | 1.382  | 1.29E-24   |
| PTP4A3    | 0.267  | -0.165 | 0.338  | 0.687 | -0.175 | 1.35E-08   |
| PDE1C     | -0.379 | 0.029  | 0.517  | 0.73  | 0.825  | 2.15E-72   |
| SLC15A3   | -0.048 | 0.262  | 0.319  | 0.746 | 1.613  | 2.8E-22    |
| P4HA2     | 0.282  | 0.214  | 0.156  | 0.614 | 0.78   | 8.29E-16   |
| AQP3      | 0.172  | 0.175  | 0.349  | 0.653 | -0.981 | 4.66E-11   |
| CCDC125   | 0.052  | 0.014  | 0.541  | 0.705 | 0.886  | 1.95E-08   |

|           |        |        |       |       |       |           |
|-----------|--------|--------|-------|-------|-------|-----------|
| PTCHD4    | -0.282 | 1.055  | 0.919 | 1.001 | 1.729 | 3.89E-39  |
| ARRB1     | 0.059  | 0.096  | 0.555 | 0.71  | 1.405 | 1.06E-49  |
| TNFSF4    | -0.075 | 0.605  | 0.874 | 0.867 | 1.852 | 1.49E-117 |
| TENM3     | 0.152  | -0.008 | 0.201 | 0.677 | 1.38  | 2.92E-48  |
| NSFP1     | #N/A   | #N/A   | #N/A  | #N/A  | #N/A  | #N/A      |
| FLT3LG    | 0.099  | 0.708  | 0.885 | 0.704 | 0.986 | 0.000131  |
| PARP14    | 0.006  | 0.602  | 0.871 | 0.889 | 1.905 | 3.07E-131 |
| MBNL2     | 0.516  | 0.113  | 0.342 | 0.786 | 1.131 | 2.01E-50  |
| EBI3      | -0.021 | 0.987  | 0.849 | 1.106 | 1.859 | 2.13E-22  |
| ZC3HAV1   | 0.452  | 0.48   | 0.473 | 0.807 | 0.82  | 6.47E-09  |
| REPS2     | 0.396  | 0.143  | 0.256 | 0.706 | 0.91  | 1.38E-16  |
| OPTN      | 0.123  | 0.482  | 0.535 | 0.642 | 1.289 | 5.56E-80  |
| PKP2      | 0.001  | 0.098  | 0.417 | 0.591 | 0.376 | 0.000999  |
| OSBP2     | 0.258  | 0.093  | 0.285 | 0.644 | 1.411 | 1.04E-42  |
| CTSS      | 0.063  | 0.339  | 0.41  | 0.72  | 2.041 | 3.62E-185 |
| PKM       | 0.362  | 0.117  | 0.089 | 0.569 | 0.833 | 1.42E-10  |
| SP110     | 0.293  | 0.245  | 0.334 | 0.652 | 0.885 | 4.51E-12  |
| PLAT      | 0.286  | 0.133  | 0.307 | 0.919 | 3.139 | 7.03E-245 |
| FRMD4A    | 0.3    | 0.092  | 0.514 | 0.618 | 0.932 | 1.28E-78  |
| DBNDD1    | -0.077 | 0.051  | 0.362 | 0.818 | 1.428 | 4.68E-105 |
| APLF      | -0.173 | 0.825  | 1.102 | 0.951 | 1.11  | 5.33E-21  |
| PLD1      | -0.245 | -0.034 | 0.621 | 0.941 | 1.649 | 1.11E-95  |
| ARL4C     | 0.44   | 0.465  | 0.664 | 1.157 | 3.398 | 5.32E-146 |
| CHAC1     | -0.212 | -0.102 | 0.53  | 0.6   | 0.44  | 1.1E-08   |
| STX6      | 0.333  | 0.405  | 0.471 | 0.641 | 1.15  | 6.92E-44  |
| NDST1     | -0.012 | -0.02  | 0.228 | 0.587 | 1.632 | 1.64E-187 |
| B4GAT1    | -0.079 | 0.088  | 0.093 | 0.592 | 0.734 | 4.76E-24  |
| MMP14     | 0.146  | 0.245  | 0.376 | 0.702 | 1.439 | 2.93E-103 |
| CSGALNAC1 | -0.022 | 0.069  | 0.567 | 1.121 | 2.116 | 2.29E-93  |
| PIK3CD    | -0.223 | 0.604  | 0.742 | 0.654 | 1.672 | 6.77E-118 |
| FAM63A    | -0.308 | 0.132  | 0.447 | 0.6   | 0.581 | 6.28E-23  |
| ADM2      | 0.479  | 0.562  | 0.861 | 0.986 | 1.413 | 1.28E-07  |
| DTX3L     | -0.033 | 0.646  | 0.8   | 0.997 | 1.612 | 7.43E-90  |
| PDLIM1    | 0.293  | 0.379  | 0.476 | 1.022 | 1.408 | 6.18E-45  |
| AJUBA     | 0.012  | 0.181  | 0.547 | 0.603 | 0.517 | 7.01E-28  |
| ALDH7A1   | 0.341  | 0.283  | 0.313 | 0.736 | 1.669 | 8.74E-87  |
| PCYOX1    | 0.174  | 0.128  | 0.16  | 0.597 | 1.112 | 1.23E-38  |
| NMI       | 0.168  | 0.07   | 0.156 | 0.578 | 0.672 | 9.62E-19  |

|           |        |        |        |       |       |            |
|-----------|--------|--------|--------|-------|-------|------------|
| ATP2B4    | 0.128  | -0.038 | 0.296  | 0.595 | 1.38  | 4.84E-93   |
| ICAM2     | -0.259 | -0.171 | 0.195  | 0.628 | 0.803 | 9.2E-45    |
| PHYH      | 0.176  | 0.392  | 0.514  | 0.578 | 0.556 | 0.0000121  |
| RAB38     | 0.192  | 0.353  | 0.531  | 1.017 | 0.479 | 0.0051     |
| MEDAG     | 0.283  | -0.837 | -0.137 | 0.662 | 1.424 | 2.52E-92   |
| TMEM217   | 0.485  | 1.866  | 1.801  | 1.525 | 3.171 | 1.1E-122   |
| HNRNPA1P7 | 0.222  | 0.219  | 0.265  | 0.624 | 0.475 | 2.4E-18    |
| FRMD6     | 0.095  | 0.573  | 0.785  | 0.866 | 1.963 | 6.69E-145  |
| DDIT4L    | 0.369  | 0.586  | 0.699  | 0.788 | 2.917 | 7.34E-62   |
| ICAM1     | 0.116  | 1.137  | 0.956  | 0.963 | 2.611 | 1.57E-89   |
| NR3C2     | -0.363 | -0.083 | 0.141  | 0.615 | 0.985 | 4.48E-31   |
| DDB1      | 0.463  | 0.259  | 0.231  | 0.648 | 0.635 | 0.00000962 |
| F8A1      | 0.025  | 0.115  | 0.311  | 0.78  | 0.829 | 5.14E-10   |
| TGM2      | 0.148  | -0.123 | 0.058  | 0.701 | 1.255 | 7.54E-33   |
| EEFSEC    | 0.314  | 0.223  | 0.363  | 0.673 | 0.246 | 0.0000138  |
| MERTK     | -0.278 | 0.599  | 1.139  | 1.158 | 1.778 | 3.81E-87   |
| EFL1      | 0.305  | 0.169  | 0.437  | 1.012 | 1.085 | 7.73E-27   |
| WSCD1     | -0.243 | 0.107  | 0.607  | 0.952 | 1.849 | 2.43E-88   |
| REV3L     | 0.489  | 0.807  | 0.705  | 0.693 | 0.997 | 8.99E-41   |
| OGFRL1    | 0.278  | 0.267  | 0.522  | 0.645 | 1.988 | 5.09E-209  |
| AXL       | 0.1    | 0.095  | 0.328  | 0.672 | 0.779 | 1.05E-30   |
| RELB      | 0.213  | 1.85   | 1.101  | 0.575 | 1.811 | 1.85E-98   |
| C14orf93  | 0.287  | 0.186  | 0.413  | 0.599 | 0.425 | 0.00732    |
| ICOSLG    | 0.307  | 1.197  | 1.432  | 1.036 | 1.96  | 1.79E-36   |
| ZER1      | 0.205  | 0.198  | 0.382  | 0.709 | 0.777 | 4.34E-13   |
| UBE2L6    | 0.151  | 0.088  | 0.325  | 0.744 | 2.148 | 1.45E-70   |
| KISS1     | -0.318 | 0.002  | 0.247  | 1.108 | 1.859 | 6.29E-21   |
| IL32      | 0.221  | 0.52   | 0.757  | 0.823 | 2.378 | 3.45E-209  |
| APOL3     | 0.073  | 0.762  | 1.47   | 1.259 | 2.578 | 4.83E-142  |
| SASH1     | 0.273  | 0.153  | 0.71   | 0.967 | 1.299 | 1.1E-81    |
| DYSF      | 0.24   | 0.03   | 0.414  | 0.887 | 2.234 | 1.04E-154  |
| DARS      | 0.321  | 0.137  | 0.227  | 0.661 | 0.647 | 4.38E-16   |
| DAB2      | 0.268  | 0.172  | 0.338  | 0.612 | 1.317 | 1.38E-102  |
| RHBDF2    | -0.181 | 0.245  | 0.795  | 0.85  | 1.64  | 5.35E-185  |
| DGKA      | 0.067  | 0.597  | 0.871  | 0.66  | 0.567 | 1E-79      |
| SYNE1     | 0.117  | 0.355  | 0.565  | 0.783 | 1.117 | 1.06E-58   |
| KCNMA1    | 0.192  | 0.096  | 0.56   | 0.77  | 2.841 | 4.13E-190  |
| TLR1      | -0.137 | 0.228  | 0.277  | 0.618 | 0.944 | 6.81E-13   |

|           |        |        |        |       |       |            |
|-----------|--------|--------|--------|-------|-------|------------|
| KCNN4     | 0.334  | 0.065  | 0.567  | 0.869 | 1.165 | 1.2E-10    |
| TLR3      | 0.574  | 0.664  | 0.71   | 1.038 | 1.41  | 9.96E-17   |
| NSF       | 0.477  | 0.221  | 0.245  | 0.592 | 0.414 | 0.000136   |
| ANGPTL4   | 0.035  | 0.031  | 0.983  | 1.277 | 1.391 | 4.46E-57   |
| GAL3ST4   | 0.518  | 1.024  | 1.342  | 1.784 | 2.303 | 5.13E-53   |
| RAP2B     | 0.568  | 0.249  | 0.35   | 0.606 | 1.129 | 7.09E-66   |
| C21orf33  | 0.087  | -0.197 | -0.074 | 0.515 | 0.464 | 0.0127     |
| OAS2      | -0.03  | -0.014 | 0.611  | 1.101 | 2.157 | 5.54E-91   |
| CITED2    | 0.208  | 0.273  | 0.266  | 0.614 | 0.413 | 0.00000029 |
| OAS3      | 0.171  | 0.472  | 0.562  | 0.817 | 0.948 | 2.52E-17   |
| CD82      | -0.048 | 0.18   | 0.808  | 1.349 | 3.282 | 3.6E-162   |
| APOL6     | #N/A   | #N/A   | #N/A   | #N/A  | #N/A  | #N/A       |
| TRIP4     | 0.336  | 0.235  | 0.262  | 0.585 | 0.379 | 4.45E-10   |
| MYO5C     | -0.311 | 0.146  | 0.819  | 1.03  | 2.442 | 2.11E-92   |
| JUP       | 0.184  | 0.078  | 0.302  | 0.906 | 2.285 | 1.31E-159  |
| KIAA1211L | 0.242  | 0.367  | 0.736  | 1.026 | 1.729 | 1.92E-83   |
| DUSP16    | 0.357  | 0.537  | 0.558  | 0.617 | 1.276 | 4.04E-33   |
| BBS2      | -0.066 | 0.195  | 0.503  | 0.675 | 0.834 | 4.1E-30    |
| DDX18P1   | 0.329  | 0.322  | 0.189  | 0.609 | -0.04 | 0.0201     |
| PTER      | 0.212  | 0.174  | 0.014  | 0.718 | 0.808 | 4.55E-12   |
| DPF3      | -0.523 | 0.143  | 0.774  | 0.584 | 1.058 | 4.78E-39   |
| TTC12     | 0.205  | 0.318  | 0.65   | 0.948 | 1.095 | 1.49E-13   |
| SPATA18   | 0.565  | 1.447  | 1.726  | 1.843 | 2.242 | 2.58E-158  |
| CCND1     | 0.182  | 0.036  | 0.269  | 0.607 | 0.925 | 2.17E-59   |
| GMDS      | 0.515  | 0.202  | 0.094  | 0.575 | 0.86  | 1.15E-22   |
| CXorf36   | 0.001  | -0.042 | 0.558  | 0.681 | 3.101 | 1.09E-71   |
| ADAMTS18  | -0.388 | -0.065 | 0.617  | 0.693 | 2.15  | 3.17E-23   |
| OGDH      | 0.456  | 0.183  | 0.117  | 0.561 | 0.243 | 0.000235   |
| TRIB3     | -0.296 | -0.026 | 0.328  | 0.67  | 0.834 | 2.43E-26   |
| BCL2L1    | 0.49   | 0.528  | 0.68   | 1.035 | 1.091 | 2.05E-33   |
| FAM210B   | 0.483  | 0.452  | 0.59   | 0.883 | 1.646 | 1.31E-179  |
| SULF2     | 0.454  | 0.35   | 0.465  | 0.883 | 2.26  | 1.29E-188  |
| DYNC112P1 | 0.41   | 0.155  | 0.107  | 0.617 | 0.681 | 2.07E-12   |
| TCEA3     | -0.207 | 0.577  | 0.906  | 1.035 | 1.63  | 5.01E-14   |
| ANGPTL2   | 0.51   | 0.495  | 0.778  | 1.348 | 2.288 | 7.93E-111  |
| DYNC112   | 0.354  | 0.162  | 0.094  | 0.577 | 0.653 | 3.37E-14   |
| TNIP1     | 0.056  | 0.607  | 0.744  | 0.912 | 1.663 | 7.75E-106  |
| RHOD      | -0.183 | 0.368  | 0.166  | 0.682 | 1.413 | 1.17E-12   |

|            |        |        |       |       |        |           |
|------------|--------|--------|-------|-------|--------|-----------|
| ITGA2      | 0.069  | 0.913  | 1.015 | 1.131 | 1.776  | 5.77E-137 |
| SUGCT      | 0.311  | 0.352  | 0.736 | 1.19  | 2.108  | 6.3E-39   |
| MORN4      | -0.117 | 0.077  | 0.346 | 0.601 | 0.471  | 0.000126  |
| ITGA3      | 0.182  | 0.099  | 0.272 | 0.64  | 1.027  | 4.69E-35  |
| DIAPH2     | 0.521  | 0.065  | 0.292 | 0.701 | 0.76   | 5.21E-24  |
| GALNT1     | 0.068  | 0.228  | 0.279 | 0.596 | 0.861  | 1.02E-45  |
| EPHX4      | -0.132 | 0.173  | 0.561 | 1.26  | 3.134  | 5.05E-52  |
| DLG1       | -0.188 | 0.12   | 0.399 | 0.617 | 1.209  | 2.5E-114  |
| CLMN       | 0.233  | 0.034  | 0.915 | 0.878 | 2.073  | 8.52E-56  |
| PSAT1      | 0.174  | 0.017  | 0.248 | 0.712 | 0.454  | 6.43E-10  |
| SCHIP1     | -0.085 | 0.85   | 1.535 | 1.281 | 2.235  | 1.24E-31  |
| THAP8      | -0.269 | 0.086  | 0.163 | 0.621 | -0.121 | 0.0000133 |
| CDIP1      | 0.458  | 0.81   | 0.896 | 1.123 | 1.118  | 4.14E-27  |
| IRAK2      | 0.414  | 0.909  | 0.684 | 0.616 | 1.847  | 7.55E-106 |
| DENND1A    | 0.419  | 0.015  | 0.35  | 0.738 | 0.377  | 2.78E-13  |
| WDFY4      | -0.084 | -0.241 | 0.059 | 0.612 | 0.886  | 1.1E-39   |
| BNIP3L     | 0.211  | 0.322  | 0.589 | 0.994 | 1.679  | 1.68E-121 |
| SLC7A14    | -0.304 | 0.4    | 0.96  | 1.256 | 1.953  | 4.61E-97  |
| HIST1H2BK  | 0.37   | 0.367  | 0.382 | 0.945 | 0.936  | 4.82E-13  |
| P2RX4      | -0.07  | 0.236  | 0.44  | 0.657 | 1.701  | 5.87E-90  |
| ISCU       | 0.212  | 0.546  | 0.689 | 0.611 | 0.833  | 9.62E-42  |
| TRIM22     | 0.443  | 0.963  | 1.104 | 1.164 | 1.584  | 1.85E-227 |
| LOXL4      | 0.289  | 0.517  | 0.638 | 0.98  | 1.34   | 7.92E-13  |
| LL21NC02-2 | 0.129  | 0.434  | 0.318 | 0.59  | 1.303  | 1.72E-07  |
| CCDC136    | -0.197 | 0.756  | 0.909 | 0.713 | 1.046  | 5.29E-17  |
| ZFAT       | 0.332  | 0.209  | 0.254 | 0.766 | 0.46   | 1.98E-07  |
| INPP5D     | -0.19  | -0.44  | 0.236 | 0.686 | 0.79   | 1.22E-44  |
| RNASEL     | -0.186 | 0.231  | 0.327 | 0.785 | 0.888  | 6.14E-09  |
| TNS3       | -0.077 | 0.098  | 0.594 | 0.855 | 1.453  | 7.43E-127 |
| MGLL       | 0.244  | -0.027 | 0.191 | 0.697 | 1.597  | 7.88E-112 |
| GPHN       | 0.531  | 0.206  | 0.301 | 0.672 | 0.261  | 0.0000117 |
| HIST1H2BC  | 0.45   | 0.679  | 0.811 | 0.99  | 0.377  | 0.0039    |
| PALM       | 0.367  | -0.218 | 0.326 | 0.704 | 1.309  | 7.62E-12  |
| NRROS      | 0.095  | -0.349 | 0.161 | 0.687 | 0.984  | 3.13E-14  |
| SAMD9      | 0.374  | 0.304  | 0.429 | 0.83  | 0.996  | 7.92E-18  |
| MYH16      | -0.003 | 0.839  | 2.054 | 2.735 | 5.406  | 1.82E-176 |
| CADM4      | 0.185  | 0.613  | 0.567 | 0.73  | 2.118  | 6.67E-31  |
| DFNA5      | 0.362  | 0.39   | 0.699 | 1.155 | 1.718  | 2.93E-123 |

|          |        |        |       |       |       |            |
|----------|--------|--------|-------|-------|-------|------------|
| PDGFC    | 0.439  | 0.797  | 0.61  | 1.008 | 1.615 | 9.7E-117   |
| IL12A    | 0.544  | 1.478  | 1.564 | 0.608 | 1.6   | 1.59E-12   |
| MFSD6    | 0.216  | 0.496  | 0.382 | 0.614 | 1.45  | 9.69E-19   |
| GBP3     | -0.246 | 0.092  | 0.457 | 0.628 | 0.973 | 1.19E-77   |
| CTNNBIP1 | 0.119  | -0.039 | 0.184 | 0.581 | 1.712 | 3.19E-220  |
| SH3BP5   | -0.003 | 0.143  | 0.476 | 0.766 | 1.887 | 1.98E-146  |
| PSMD1    | 0.488  | 0.269  | 0.191 | 0.61  | 0.218 | 0.000162   |
| CHST1    | -0.124 | -0.236 | 0.611 | 0.782 | 2.274 | 4.68E-151  |
| RPH3AL   | 0.059  | -0.224 | 0.317 | 0.821 | 0.691 | 2.41E-16   |
| EEF1A2   | 0.424  | 0.278  | 0.303 | 0.751 | 0.594 | 0.00435    |
| SYT9     | 0.179  | 0.002  | 0.231 | 0.669 | 1.559 | 5.08E-73   |
| PSMD2    | 0.402  | 0.224  | 0.21  | 0.641 | 0.9   | 1.45E-16   |
| YBX3     | 0.388  | 0.594  | 0.724 | 0.847 | 1.229 | 1.54E-107  |
| ARHGAP22 | -0.196 | 0.042  | 0.707 | 0.936 | 1.485 | 1.75E-125  |
| APOL1    | 0.258  | 0.363  | 0.68  | 1.093 | 2.229 | 2.19E-97   |
| PSMB9    | 0.065  | 0.433  | 0.738 | 1.047 | 1.989 | 1.61E-31   |
| NBR1     | 0.275  | 0.16   | 0.308 | 0.717 | 0.828 | 3.36E-24   |
| EHD2     | 0.326  | 0.089  | 0.08  | 0.563 | 0.679 | 0.00000295 |
| MARCKS   | 0.192  | 0.011  | 0.075 | 0.644 | 1.241 | 1.29E-63   |
| SLC47A1  | 0.107  | 0.453  | 0.59  | 0.755 | 0.406 | 1.9E-17    |
| HCG11    | 0.259  | 0.318  | 0.468 | 0.79  | 0.626 | 6.39E-07   |
| SMAD3    | 0.35   | 0.642  | 0.889 | 0.778 | 1.727 | 1.04E-112  |
| MYLK     | 0.217  | 0.019  | 0.18  | 0.634 | 1.599 | 3.82E-112  |
| WDR66    | 0.398  | 0.195  | 0.617 | 0.66  | 1.361 | 4E-15      |
| LRP1     | -0.029 | 0.446  | 0.702 | 0.613 | 0.88  | 0.00000236 |
| SH3RF3   | 0.328  | -0.077 | 0.538 | 0.976 | 1.946 | 2.65E-162  |
| NIPAL3   | 0.127  | 0.252  | 0.483 | 0.81  | 0.777 | 5.68E-45   |
| SIPA1L3  | 0.216  | 0.016  | 0.728 | 1.071 | 1.93  | 9.87E-213  |
| MPP4     | -0.096 | 0.034  | 0.699 | 0.924 | 2.993 | 3.37E-143  |
| TRIM5    | 0.481  | 0.572  | 0.583 | 0.763 | 0.977 | 5.23E-18   |
| TMEM140  | 0.102  | -0.034 | 0.192 | 0.572 | 1.78  | 1.37E-31   |
| LRRC71   | -0.44  | -0.05  | 1.112 | 0.617 | 0.367 | 1.78E-09   |
| LMF1     | 0.024  | 0.084  | 0.078 | 0.653 | 0.427 | 2.27E-08   |
| LTA4H    | 0.17   | 0.226  | 0.316 | 0.768 | 0.909 | 3.76E-27   |
| HSDL2    | 0.343  | 0.335  | 0.439 | 0.689 | 0.766 | 9.34E-22   |
| LRP10    | 0.15   | 0.202  | 0.222 | 0.674 | 1.054 | 1.08E-39   |
| CYFIP2   | 0.353  | 1.565  | 1.803 | 2.174 | 2.523 | 3.17E-142  |
| EPS8L2   | 0.103  | 1.353  | 1.842 | 1.662 | 2.574 | 3.22E-137  |

|           |        |        |       |       |       |            |
|-----------|--------|--------|-------|-------|-------|------------|
| BHLHE40   | 0.496  | 0.399  | 0.886 | 1.074 | 2.47  | 1.17E-78   |
| CDCP1     | 0.112  | 0.138  | 0.556 | 1.101 | 3.544 | 4.06E-251  |
| LMNA      | 0.432  | 0.174  | 0.125 | 0.567 | 0.588 | 0.0000247  |
| LRRC2     | -0.256 | 0.033  | 0.331 | 0.691 | 0.459 | 0.0000154  |
| F11R      | 0.169  | 0.554  | 0.812 | 1.127 | 1.723 | 2.88E-175  |
| PAR6A     | -0.523 | -0.277 | 0.493 | 1.021 | 0.875 | 4.81E-13   |
| CCND2     | -0.489 | 0.35   | 0.967 | 0.829 | 2.169 | 5.2E-221   |
| PLEKHG1   | -0.43  | 0.427  | 0.799 | 0.907 | 1.855 | 7.49E-153  |
| SPINT2    | -0.039 | 0.317  | 0.228 | 0.617 | 0.423 | 0.0404     |
| RAB3D     | -0.242 | -0.138 | 0.233 | 0.592 | 0.754 | 4.26E-37   |
| VSIG1     | 0.382  | 0.402  | 0.463 | 0.797 | 0.227 | 1.06E-08   |
| CIR1      | 0.307  | 0.357  | 0.166 | 0.587 | 0.509 | 5.31E-07   |
| GAS6-AS2  | 0.104  | 0.36   | 0.769 | 0.779 | 2.108 | 6.97E-34   |
| TP53I11   | -0.038 | 0.22   | 0.543 | 0.704 | 1.946 | 7.64E-172  |
| ETNK2     | 0.106  | 0.198  | 0.297 | 0.684 | 0.578 | 1.49E-12   |
| HIST1H2BD | 0.147  | 0.264  | 0.759 | 1.123 | 1.246 | 5.56E-07   |
| PNMAL1    | 0.032  | -0.302 | 0.194 | 0.708 | 0.551 | 1.16E-14   |
| CELF2     | 0.097  | 0.138  | 0.533 | 0.933 | 2.34  | 1.15E-67   |
| ABLIM1    | 0.218  | 0.456  | 0.647 | 0.97  | 2.007 | 1.82E-89   |
| KHDRBS3   | 0.024  | 0.026  | 0.161 | 0.591 | 0.704 | 8.95E-19   |
| TTC30A    | -0.086 | 0.212  | 0.068 | 0.645 | 0.59  | 0.00000894 |
| DPYSL2    | 0.338  | -0.101 | 0.249 | 0.824 | 1.377 | 4.87E-45   |
| APOBEC3B  | 0.041  | 0.346  | 0.545 | 1.108 | 1.076 | 2.08E-24   |
| CASP1     | -0.067 | 0.361  | 0.956 | 1.02  | 2.191 | 3.31E-50   |
| TAP1      | 0.328  | 0.938  | 0.922 | 0.902 | 1.261 | 7.24E-59   |
| PNMA2     | -0.564 | 0      | 0.949 | 1.353 | 2.416 | 1E-135     |
| LIMS1     | 0.447  | 0.079  | 0.132 | 0.582 | 1.293 | 5.11E-79   |
| RPTOR     | 0.371  | 0.144  | 0.256 | 0.568 | 0.256 | 0.0000246  |
| SRGAP1    | 0.406  | 0.379  | 0.706 | 0.667 | 1.094 | 2.48E-40   |
| EPB41L3   | 0.409  | 0.219  | 0.236 | 0.735 | 1.416 | 1.85E-46   |
| CXCR4     | -0.328 | 0.669  | 1.207 | 1.198 | 3.156 | 5.31E-93   |
| CASP7     | -0.045 | 0.311  | 0.608 | 0.652 | 1.356 | 9.09E-78   |
| NACAD     | 0.004  | 0.49   | 0.639 | 0.653 | -0.12 | 4.09E-08   |
| KRT80     | 0.517  | 0.456  | 0.85  | 1.027 | 1.128 | 5.63E-67   |
| KIAA1324  | 0.237  | 0.417  | 0.678 | 0.982 | 0.825 | 3.02E-15   |
| GOLPH3L   | -0.114 | 0.286  | 0.302 | 0.574 | 0.905 | 1E-30      |
| NEK1      | 0.054  | 0.218  | 0.449 | 0.713 | 0.45  | 3.99E-17   |
| ABCG1     | 0.263  | 0.253  | 0.827 | 1.352 | 2.384 | 7.04E-79   |



|          |        |        |       |       |       |            |
|----------|--------|--------|-------|-------|-------|------------|
| NUDT8    | 0.126  | 0.533  | 0.473 | 0.571 | 0.623 | 0.000846   |
| LAMP3    | -0.031 | 0.198  | 0.261 | 0.722 | 1.102 | 1.69E-33   |
| EPHA4    | 0.198  | 0.74   | 0.852 | 0.657 | 1.331 | 8.88E-44   |
| INSC     | 0.355  | 0.046  | 0.658 | 1.137 | 2.4   | 2.75E-60   |
| NFE2L3   | 0.255  | 0.303  | 0.337 | 0.754 | 1.557 | 5.82E-72   |
| CREB3L1  | 0.315  | 0.176  | 0.615 | 0.731 | 2.932 | 1.9E-86    |
| CRTAC1   | 0.187  | 0.114  | 0.493 | 0.649 | 1.941 | 9.62E-24   |
| GPX3     | 0.041  | 0.074  | 0.243 | 0.648 | 0.833 | 5.07E-34   |
| NCOR2    | 0.422  | -0.222 | 0.449 | 0.736 | 1.195 | 6.67E-73   |
| LAMB3    | -0.039 | 0.174  | 0.222 | 0.601 | 1.339 | 4.72E-28   |
| PBXIP1   | 0.055  | 0.118  | 0.243 | 0.647 | 1.783 | 2.63E-175  |
| LAMC2    | 0.301  | 0.138  | 0.436 | 0.755 | 2.528 | 1.42E-70   |
| PLCL2    | 0.525  | 0.696  | 0.534 | 0.673 | 1.406 | 2.84E-24   |
| GPC1     | 0.398  | 0.736  | 0.852 | 1.225 | 1.991 | 6.94E-83   |
| NF2      | -0.097 | -0.061 | 0.187 | 0.61  | 1.085 | 5.19E-79   |
| TRAC     | 0.368  | 0.547  | 1.039 | 1.497 | 2.403 | 5.5E-25    |
| SPINT1   | #N/A   | #N/A   | #N/A  | #N/A  | #N/A  | #N/A       |
| FEZ1     | 0.235  | 0.263  | 0.412 | 0.748 | 1.148 | 2.55E-82   |
| ORAI3    | 0.17   | 0.361  | 0.505 | 0.685 | 1.511 | 3.66E-31   |
| CCNG2    | 0.178  | 0.22   | 0.281 | 0.637 | 1.587 | 5.24E-110  |
| SERPINB1 | 0.294  | 0.082  | 0.217 | 0.634 | 0.935 | 4.05E-35   |
| CCNG1    | 0.545  | 0.765  | 0.763 | 0.696 | 1.176 | 1.5E-80    |
| TRIM21   | 0.096  | 0.51   | 0.669 | 0.986 | 1.25  | 8.98E-51   |
| TCAIM    | -0.024 | 0.252  | 0.481 | 0.605 | 0.664 | 6.27E-34   |
| ZNF385A  | 0.36   | 0.612  | 0.81  | 0.941 | 1.253 | 1.77E-25   |
| PLA2G4C  | 0.007  | 0.712  | 1.364 | 1.767 | 4.326 | 4.6e-311   |
| NINJ1    | 0.313  | 0.499  | 0.799 | 1.086 | 2.05  | 2.68E-147  |
| RUVBL1   | 0.314  | 0.1    | 0.045 | 0.599 | 0.468 | 3.57E-09   |
| KRT17    | 0.138  | 0.682  | 1.19  | 1.62  | 2.149 | 1.28E-27   |
| HHIPL1   | 0.219  | 0.146  | 0.492 | 0.708 | 1.269 | 9.2E-16    |
| SEMA4B   | 0.08   | 0.011  | 0.428 | 0.624 | 1.096 | 1.68E-30   |
| YPEL1    | -0.52  | 0.145  | 0.273 | 0.618 | 1.859 | 4.58E-39   |
| KRT18    | 0.144  | 0.055  | 0.283 | 0.841 | 1.452 | 3.5E-65    |
| ASTN2    | 0.496  | 1.05   | 1.878 | 1.812 | 2.098 | 1.11E-35   |
| ACP7     | 0.224  | 0.07   | 0.132 | 0.613 | 0.623 | 0.00000795 |
| GSN      | 0.352  | 0.269  | 0.273 | 0.788 | 0.807 | 5.32E-14   |
| LYNX1    | 0.408  | 0.854  | 1.077 | 1.456 | 1.792 | 2.62E-30   |
| MYRIP    | 0.555  | -0.285 | 0.38  | 1.101 | 1.258 | 1.15E-31   |

|          |        |        |        |        |        |            |
|----------|--------|--------|--------|--------|--------|------------|
| CYGB     | -0.149 | -0.006 | 0.896  | 0.947  | 1.658  | 3.81E-16   |
| ZNF521   | 0.344  | 0.045  | 0.176  | 0.625  | 0.794  | 1.36E-15   |
| SYNC     | 0.228  | 0.473  | 0.854  | 0.938  | 1.418  | 3.94E-50   |
| EHHADH   | 0.208  | 0.055  | 0.21   | 0.717  | 0.386  | 0.000187   |
| EEF2     | 0.383  | 0.255  | 0.243  | 0.61   | 0.923  | 1.97E-16   |
| STAT3    | 0.427  | 0.339  | 0.334  | 0.604  | 0.836  | 2.69E-15   |
| CHMP4B   | 0.306  | 0.198  | 0.197  | 0.585  | 1.01   | 5.9E-45    |
| FAM131B  | 0.305  | 0.091  | 0.171  | 0.589  | 0.814  | 0.0000288  |
| ZNF185   | 0.345  | 0.061  | 0.211  | 0.699  | 1.148  | 1.67E-37   |
| CDA      | 0.3    | 0.03   | 0.464  | 0.721  | 1.366  | 4.62E-08   |
| SQRDL    | 0.222  | 0.138  | 0.254  | 0.682  | 0.668  | 1.11E-16   |
| UBD      | #N/A   | #N/A   | #N/A   | #N/A   | #N/A   | #N/A       |
| EFNB1    | 0.534  | 0.379  | 0.315  | 0.615  | 1.415  | 6.22E-62   |
| STC1     | -0.366 | -0.237 | 0.43   | 0.582  | 3.786  | 2.13E-275  |
| MAMDC2   | 0.369  | 0.543  | 0.937  | 1.402  | 2.945  | 0          |
| ELFN2    | 0.524  | 0.055  | 0.386  | 0.72   | 0.89   | 3.36E-09   |
| CD79B    | -0.152 | 0.196  | 0.407  | 0.63   | 0.301  | 0.000338   |
| ST13P3   | 0.279  | 0.66   | 0.33   | 0.886  | 0.957  | 1.02E-07   |
| ST5      | 0.056  | -0.345 | 0.181  | 0.621  | 0.602  | 1.27E-11   |
| SLC27A3  | -0.576 | -0.145 | -0.219 | -0.718 | -1.36  | 3.04E-50   |
| NEAT1    | -0.522 | 0.314  | 0.095  | -0.802 | -0.096 | 0.00000293 |
| ZNF789   | -0.439 | -0.098 | -0.012 | -0.815 | -0.799 | 4.17E-09   |
| DNAJC19  | -0.507 | -0.323 | -0.145 | -0.67  | -0.755 | 2.25E-08   |
| PLCXD1   | -0.263 | -0.128 | -0.233 | -1.002 | -0.733 | 2.88E-24   |
| ZGRF1    | -0.009 | 0.182  | -0.308 | -0.76  | -0.948 | 3.82E-42   |
| SNORA33  | -0.087 | 0.381  | 0.102  | -0.57  | -0.693 | 0.0000099  |
| SNORD100 | -0.33  | 0.275  | 0.058  | -0.874 | -0.894 | 0.00000705 |
| FANCB    | -0.122 | -0.093 | -0.481 | -0.77  | -1.134 | 1.42E-25   |
| SNORD101 | -0.028 | 0.201  | 0.373  | -0.774 | -0.916 | 3.61E-08   |
| SLC22A31 | -0.119 | -0.109 | -0.213 | -0.612 | -1.353 | 6.47E-08   |
| RPL37P2  | -0.388 | -0.364 | -0.129 | -0.661 | -0.643 | 0.00401    |
| DND1     | -0.193 | -0.096 | 0.05   | -1.073 | -0.854 | 0.00000054 |
| GDPD3    | -0.439 | -0.121 | 0.286  | -0.71  | -0.559 | 1.84E-08   |
| SLCO2A1  | 0.228  | -0.284 | -0.858 | -0.886 | -2.54  | 9.91E-99   |
| NOL12    | -0.554 | -0.181 | -0.117 | -0.699 | -0.982 | 3.39E-18   |
| LSMEM1   | 0.167  | 0.043  | 0.272  | -0.658 | -0.586 | 0.000227   |
| ZNF121   | -0.066 | 0.279  | 0.173  | -0.697 | -0.578 | 3.1E-22    |
| ATP5EP2  | -0.448 | -0.274 | -0.141 | -0.594 | -0.527 | 0.0197     |

|           |        |        |        |        |        |            |
|-----------|--------|--------|--------|--------|--------|------------|
| MIR4691   | -0.455 | 0      | -0.189 | -0.979 | -0.77  | 0.00121    |
| DERL3     | -0.194 | -0.573 | -0.567 | -0.977 | -1.947 | 1.03E-15   |
| RN7SL431P | 0.181  | -0.112 | 0.094  | -0.655 | -0.537 | 0.011      |
| ACAT2     | 0.214  | -0.227 | -0.528 | -0.654 | -0.796 | 1.7E-57    |
| CACNG8    | -0.361 | -0.238 | -0.001 | -0.937 | -1.149 | 8.65E-19   |
| SNHG15    | -0.37  | -0.162 | -0.191 | -0.944 | -1.189 | 7.54E-25   |
| USP32P1   | -0.482 | 0.07   | 0.173  | -0.772 | -0.522 | 0.0000112  |
| POU4F1    | -0.29  | -0.177 | -0.275 | -0.829 | -0.411 | 1.44E-10   |
| KMT2B     | -0.324 | -0.067 | -0.125 | -0.674 | -0.597 | 5E-22      |
| AGAP6     | -0.469 | 0.048  | 0.025  | -0.941 | -0.847 | 2.5E-14    |
| PKD1P6    | -0.527 | -0.336 | -0.311 | -1.226 | -0.558 | 1.48E-10   |
| HSF4      | -0.403 | 0.014  | 0.306  | -0.654 | -0.423 | 0.00000693 |
| NDUFAF5   | -0.282 | -0.165 | -0.145 | -0.707 | -0.529 | 0.00000043 |
| MPP3      | -0.163 | -0.112 | 0.132  | -0.647 | -0.891 | 1.04E-12   |
| AP3M2     | -0.246 | -0.342 | -0.252 | -0.593 | -0.295 | 0.00000249 |
| MIR1304   | -0.378 | 0.071  | 0.032  | -1.143 | -1.197 | 5.16E-19   |
| UBE2SP1   | -0.221 | -0.65  | -0.937 | -0.703 | -0.598 | 9.9E-19    |
| DGCR8     | -0.006 | -0.183 | -0.344 | -0.892 | -0.676 | 2.76E-97   |
| GPR75     | -0.081 | 0.214  | 0.264  | -0.684 | -0.279 | 0.00000903 |
| GFOD1     | 0.346  | -0.311 | -0.484 | -0.665 | -0.604 | 1.94E-41   |
| LRP5L     | -0.403 | -0.201 | -0.071 | -0.939 | -0.791 | 7.44E-07   |
| POLE      | 0.123  | 0.021  | -0.303 | -0.845 | -1.109 | 2.46E-110  |
| FGF12     | -0.173 | -0.248 | -0.94  | -0.944 | -1.232 | 2.18E-15   |
| NPIP11    | -0.322 | -0.104 | 0.046  | -0.962 | -0.669 | 2.61E-07   |
| PTPDC1    | -0.167 | -0.165 | -0.191 | -0.586 | -0.527 | 0.00000202 |
| SIRT7     | -0.512 | -0.045 | -0.141 | -0.621 | -0.596 | 3.48E-14   |
| CEBPD     | -0.047 | -0.125 | -0.635 | -0.682 | -0.16  | 0.0000682  |
| ZNF354B   | -0.298 | 0.186  | -0.076 | -0.652 | -0.416 | 0.0000767  |
| MEG3      | -0.45  | 0.013  | 0.208  | -0.875 | -0.415 | 2.94E-12   |
| SMARCD3   | 0.012  | -0.269 | -0.374 | -0.807 | -0.987 | 4.54E-13   |
| NDOR1     | -0.418 | -0.011 | -0.132 | -0.721 | -0.805 | 9.77E-29   |
| TSPYL2    | -0.155 | 0.019  | 0.002  | -0.632 | -0.747 | 1.56E-25   |
| ZNF10     | -0.073 | 0.124  | 0.045  | -0.613 | -0.345 | 0.00041    |
| ADGRL1    | 0.349  | -0.028 | -0.413 | -0.627 | -0.937 | 1.24E-17   |
| SPACA6    | -0.304 | -0.276 | -0.15  | -0.878 | -0.443 | 0.000168   |
| OCLM      | -0.418 | -0.167 | -0.362 | -0.883 | -0.69  | 0.0235     |
| NT5DC3    | -0.012 | -0.197 | 0.086  | -0.672 | -0.784 | 5.13E-20   |
| SNAPC4    | -0.501 | -0.007 | -0.101 | -0.663 | -0.109 | 1.57E-12   |

|          |        |        |        |        |        |            |
|----------|--------|--------|--------|--------|--------|------------|
| TMCO6    | -0.504 | -0.111 | -0.082 | -0.608 | -1.05  | 1.88E-40   |
| SFI1     | -0.385 | -0.2   | -0.035 | -0.62  | -0.755 | 1.18E-17   |
| SMO      | 0.004  | 0.067  | -0.605 | -0.842 | -0.569 | 0.00000113 |
| SNORD104 | -0.276 | 0.199  | 0.293  | -0.897 | -0.954 | 1.89E-09   |
| SRSF7    | 0.137  | -0.192 | -0.332 | -0.614 | -0.664 | 6.18E-50   |
| GHRLOS   | -0.561 | 0.05   | 0.125  | -1.33  | -0.929 | 2.22E-10   |
| HMGCR    | 0.423  | -0.344 | -0.706 | -0.597 | -0.022 | 1.03E-82   |
| ERCC6    | -0.397 | -0.15  | -0.389 | -0.599 | -1.726 | 7.18E-92   |
| ADM      | -0.582 | -0.092 | -0.895 | -1.161 | -1.681 | 6.89E-41   |
| SGSM2    | -0.472 | -0.082 | 0.005  | -0.662 | -0.149 | 2.65E-09   |
| MTCP1    | -0.242 | 0.333  | 0.149  | -0.691 | -0.466 | 1.03E-07   |
| LTB4R    | -0.522 | 0.214  | 0.367  | -0.65  | -0.727 | 5.79E-18   |
| PRKD1    | -0.135 | -0.204 | -0.372 | -0.749 | -0.338 | 2.04E-10   |
| AFG3L1P  | -0.258 | 0.064  | 0.065  | -0.875 | -1.008 | 4.79E-25   |
| ZFAS1    | -0.315 | -0.156 | -0.047 | -0.712 | -0.635 | 0.00000258 |
| PKD1P1   | -0.182 | 0.011  | 0.023  | -0.585 | -0.151 | 0.00443    |
| NR2C2AP  | 0.14   | -0.088 | -0.495 | -0.731 | -0.974 | 2.29E-35   |
| DZIP1L   | -0.239 | -0.02  | -0.127 | -0.85  | -1.026 | 1.23E-18   |
| XRCC2    | 0.249  | -0.028 | -0.37  | -0.787 | -0.903 | 1.45E-23   |
| XRCC3    | -0.344 | -0.056 | -0.22  | -0.628 | -1.034 | 1.29E-28   |
| UBE2S    | -0.442 | -0.657 | -0.909 | -0.886 | -0.253 | 1.3E-26    |
| INTS6L   | -0.148 | 0.177  | 0.102  | -0.741 | -0.796 | 8.98E-11   |
| SCARF2   | 0.024  | -0.077 | -0.251 | -0.73  | -0.164 | 1.46E-07   |
| TTLL3    | -0.522 | -0.133 | 0.202  | -0.714 | -0.347 | 2.63E-09   |
| PAQR4    | 0.249  | -0.134 | -0.571 | -0.691 | -1.473 | 1.27E-88   |
| SRSF2    | -0.001 | -0.057 | -0.263 | -0.633 | -0.529 | 1.01E-29   |
| TBC1D4   | -0.03  | -0.1   | -0.386 | -0.706 | -1.055 | 1.02E-54   |
| CIRBP    | -0.251 | 0.087  | -0.107 | -0.598 | -0.923 | 1.41E-31   |
| WEE1     | -0.493 | -0.498 | -0.554 | -0.643 | -0.618 | 1.25E-19   |
| C16orf59 | -0.268 | -0.145 | -0.284 | -0.689 | -1.097 | 6.31E-29   |
| MVD      | 0.43   | -0.169 | -0.504 | -0.637 | -0.292 | 4.35E-29   |
| GINS2    | -0.074 | -0.23  | -0.534 | -1.023 | -1.288 | 1.54E-50   |
| SNRPGP2  | -0.3   | -0.096 | -0.092 | -0.544 | -0.688 | 0.0184     |
| WDR90    | -0.436 | -0.002 | -0.128 | -1.049 | -1.35  | 6.54E-36   |
| PER2     | 0.251  | -0.658 | -1.325 | -1.948 | -1.226 | 1.24E-76   |
| GOLGA8A  | -0.433 | 0.049  | 0.235  | -0.702 | -0.34  | 4.54E-11   |
| LIN7B    | 0.016  | -0.422 | -0.135 | -0.868 | -1.097 | 3.21E-08   |
| PTBP2    | -0.21  | -0.007 | -0.047 | -0.683 | -0.449 | 0.0000012  |

|           |        |        |        |        |        |            |
|-----------|--------|--------|--------|--------|--------|------------|
| CBX2      | 0.183  | 0.04   | -0.419 | -0.623 | -0.339 | 8.87E-17   |
| ELMOD1    | 0.324  | -0.695 | -1.255 | -1.812 | -3.173 | 4.53E-94   |
| SLC5A3    | -0.465 | 0.034  | -0.284 | -0.63  | -0.204 | 2.1E-09    |
| GPR173    | -0.344 | -0.123 | -0.054 | -0.772 | -0.482 | 9.65E-11   |
| DLEU2     | -0.552 | -0.445 | -0.232 | -0.765 | -1.357 | 2.4E-16    |
| KIAA0895L | -0.296 | 0.002  | -0.022 | -1.026 | -0.833 | 1.9E-17    |
| CLCN6     | -0.325 | -0.043 | -0.07  | -0.685 | -0.313 | 2.51E-10   |
| ZC3H12A   | 0.091  | 0.235  | -0.069 | -0.592 | 0.064  | 2.78E-09   |
| ATXN7L2   | -0.124 | -0.02  | -0.277 | -0.689 | -0.805 | 2.54E-12   |
| FANCA     | -0.387 | 0.035  | -0.073 | -0.766 | -1.489 | 2.39E-66   |
| CENPT     | -0.472 | -0.071 | -0.077 | -0.633 | -0.723 | 6.49E-19   |
| MIR3916   | -0.421 | -0.003 | 0.04   | -0.997 | -0.506 | 1.01E-07   |
| SNORA25   | -0.236 | -0.045 | 0.091  | -0.827 | -0.925 | 2.37E-07   |
| CLK2      | -0.455 | 0.07   | 0      | -0.827 | -0.949 | 1.13E-28   |
| MIR3682   | 0.361  | 0.03   | 0.187  | -0.68  | -0.092 | 0.0172     |
| RPL32P3   | -0.454 | -0.011 | 0.164  | -0.576 | -0.296 | 0.000088   |
| EZH2      | -0.138 | -0.136 | -0.261 | -0.737 | -1.018 | 2.71E-28   |
| CEP152    | -0.289 | 0.092  | 0.019  | -0.661 | -1.049 | 7.7E-31    |
| MIR6845   | -0.551 | -0.057 | 0.261  | -0.858 | -0.683 | 0.000436   |
| IMMP1L    | -0.543 | -0.389 | -0.156 | -0.622 | -0.883 | 0.0000256  |
| LIMCH1    | 0.126  | -0.23  | -0.917 | -1.293 | -1.819 | 7.77E-34   |
| MIR3653   | -0.371 | 0.35   | 0.292  | -0.669 | -0.735 | 4.41E-07   |
| HES6      | -0.508 | -0.49  | -0.764 | -0.877 | -0.259 | 0.0000213  |
| NFKBIZ    | 0.182  | 0.354  | 0.25   | -0.798 | 0.237  | 1.4E-10    |
| KMT5C     | -0.36  | 0.213  | 0.012  | -0.601 | -0.371 | 1.66E-07   |
| SNORA4    | -0.329 | 0.214  | -0.082 | -0.739 | -0.999 | 0.00000511 |
| SNORA41   | 0.158  | 0.016  | 0.225  | -0.74  | -0.685 | 0.00101    |
| ITGB1BP2  | -0.523 | 0.008  | -0.014 | -0.975 | -1.203 | 0.00000097 |
| RPL37P23  | -0.424 | -0.312 | -0.17  | -0.639 | -0.552 | 0.000196   |
| SNORD96A  | -0.295 | 0.055  | 0.09   | -0.748 | -0.956 | 1.2E-08    |
| SCML1     | -0.149 | -0.2   | -0.201 | -0.639 | -0.754 | 4.7E-12    |
| FOXD2-AS1 | -0.351 | -0.289 | -0.272 | -0.684 | -0.737 | 0.00499    |
| ADAT2     | -0.431 | -0.029 | 0.027  | -0.636 | -0.957 | 4.29E-17   |
| MAT2A     | -0.304 | -0.214 | -0.17  | -0.676 | -0.461 | 1.57E-17   |
| ZNF625    | -0.198 | 0.052  | -0.265 | -0.795 | -0.744 | 0.00224    |
| SCD       | 0.525  | -0.157 | -0.66  | -0.657 | 0.098  | 5.8E-42    |
| SNORA52   | -0.382 | -0.031 | -0.275 | -1.095 | -1.314 | 7.09E-09   |
| MSMO1     | 0.227  | -0.503 | -0.949 | -1.014 | -0.138 | 2.69E-59   |

|             |        |        |        |        |        |            |
|-------------|--------|--------|--------|--------|--------|------------|
| COX7A2P2    | -0.473 | -0.308 | -0.111 | -0.664 | -0.74  | 0.0000536  |
| SATB1       | -0.002 | -0.11  | -0.296 | -0.766 | -0.446 | 0.0000601  |
| SNORD2      | -0.153 | 0.041  | 0.066  | -1.007 | -1.117 | 5.19E-10   |
| COX7A2      | -0.418 | -0.191 | -0.059 | -0.593 | -0.657 | 0.00151    |
| AMH         | -0.33  | 0.016  | -0.482 | -1.649 | -1.757 | 2.66E-20   |
| CCDC78      | -0.152 | 0.062  | 0.051  | -0.801 | -0.757 | 0.000428   |
| SNHG1       | -0.081 | -0.127 | -0.187 | -1.043 | -1.406 | 1.09E-32   |
| CRY1        | 0.172  | 0.01   | -0.333 | -0.647 | -0.284 | 2.78E-39   |
| NPPA-AS1    | -0.384 | 0.08   | -0.052 | -1.264 | -1.082 | 3.67E-12   |
| MAPK12      | -0.209 | -0.107 | -0.207 | -0.7   | -0.784 | 1.93E-34   |
| TIMM10      | -0.437 | -0.506 | -0.459 | -0.626 | -1.018 | 3.44E-23   |
| MZT1        | -0.468 | -0.473 | -0.502 | -0.799 | -0.876 | 1.21E-10   |
| ZNF700      | -0.352 | 0.08   | -0.162 | -0.676 | -0.639 | 1.09E-13   |
| EIF5A2      | 0.158  | -0.163 | -0.53  | -0.791 | -0.592 | 5.52E-26   |
| PER1        | -0.223 | -0.209 | -0.479 | -0.751 | -1.218 | 1.32E-35   |
| UBAP1L      | -0.127 | -0.023 | -0.004 | -1.089 | -0.759 | 0.0000379  |
| EP400NL     | -0.384 | 0.07   | 0.08   | -0.684 | -0.661 | 1.81E-13   |
| CASP8AP2    | 0.241  | 0.054  | -0.27  | -0.614 | -0.495 | 3.06E-45   |
| UNG         | 0.557  | -0.172 | -1.008 | -0.914 | -0.561 | 2.53E-80   |
| HDAC10      | -0.531 | -0.188 | -0.062 | -0.705 | -0.43  | 0.00000329 |
| MAN2C1      | -0.328 | -0.023 | 0.062  | -0.594 | -0.493 | 1.59E-10   |
| NPIPA3      | -0.179 | 0.235  | 0.349  | -0.674 | -0.697 | 0.000164   |
| HNRNPDL     | 0.047  | 0.034  | -0.152 | -0.737 | -0.757 | 3.46E-27   |
| PFDN4       | -0.328 | -0.041 | -0.123 | -0.702 | -0.573 | 0.0000531  |
| CRNDE       | -0.443 | 0.052  | -0.132 | -0.635 | -0.385 | 0.00191    |
| TAF1C       | -0.332 | -0.148 | -0.224 | -0.937 | -0.977 | 3.57E-23   |
| ZNF684      | -0.37  | -0.243 | -0.477 | -0.639 | -0.92  | 5.04E-07   |
| MDM4        | -0.451 | -0.059 | 0.178  | -0.702 | -0.82  | 5.82E-13   |
| CDCA7       | 0.051  | -0.43  | -1.028 | -1.225 | -0.901 | 1.77E-81   |
| INPP5E      | -0.278 | -0.081 | -0.11  | -0.629 | -0.317 | 1.6E-09    |
| MAP3K14     | -0.144 | -0.171 | -0.249 | -0.702 | -0.357 | 5.73E-09   |
| HIST2H2BB   | #N/A   | #N/A   | #N/A   | #N/A   | #N/A   | #N/A       |
| MEIS2       | -0.369 | 0.009  | -0.681 | -0.646 | -0.808 | 8.12E-17   |
| SLX1B-SULT1 | -0.138 | 0.229  | 0.054  | -0.735 | -0.376 | 0.0245     |
| USMG5       | -0.405 | -0.159 | -0.028 | -0.655 | -0.512 | 0.00821    |
| ORC6        | 0.22   | -0.2   | -0.572 | -0.876 | -1.053 | 2.93E-64   |
| DNAJC27     | -0.509 | -0.195 | -0.201 | -0.718 | -0.801 | 4.03E-08   |
| RNU1-103P   | 0.38   | -0.149 | 0.019  | -0.595 | -0.356 | 0.0325     |

|           |        |        |        |        |        |            |
|-----------|--------|--------|--------|--------|--------|------------|
| CLEC1B    | -0.456 | -0.306 | -0.594 | -0.929 | -2.082 | 5.73E-14   |
| MIR93     | 0.198  | -0.121 | -0.106 | -0.679 | -0.079 | 0.00769    |
| ZSCAN31   | -0.476 | -0.382 | -0.675 | -0.804 | -0.106 | 1.53E-07   |
| WASH2P    | -0.335 | -0.166 | 0.008  | -0.681 | -0.492 | 0.0104     |
| KRTCAP3   | -0.037 | -0.13  | 0.128  | -0.833 | -0.179 | 0.013      |
| NFKBID    | -0.118 | 0.032  | -0.163 | -1.01  | -1.057 | 5.38E-19   |
| AMZ2P1    | -0.53  | -0.031 | -0.06  | -0.642 | -0.766 | 5.51E-07   |
| ATAD3B    | -0.179 | 0.002  | -0.231 | -0.739 | -0.666 | 4.24E-21   |
| FSD1L     | 0.245  | 0.032  | 0.177  | -0.582 | -0.353 | 0.00000676 |
| USMG5P1   | -0.439 | -0.258 | -0.076 | -0.696 | -0.561 | 0.0191     |
| GAB1      | -0.063 | 0.358  | -0.22  | -0.634 | 0.647  | 2.16E-39   |
| GABBR1    | -0.403 | 0.114  | 0.259  | -0.686 | -0.713 | 3.99E-17   |
| CROCCP2   | -0.404 | 0.127  | 0.115  | -0.739 | -0.663 | 4.65E-15   |
| ZNF117    | -0.387 | 0.062  | 0.153  | -0.784 | -0.562 | 6.33E-11   |
| SCX       | 0.176  | -0.432 | -0.367 | -0.85  | 0.181  | 0.00135    |
| IQCC      | -0.412 | -0.131 | -0.701 | -0.657 | -1.428 | 1.45E-22   |
| IDI1      | 0.31   | -0.401 | -0.877 | -1.05  | -0.374 | 1.68E-59   |
| SUGP2     | -0.468 | -0.077 | -0.041 | -0.812 | -0.645 | 2.74E-15   |
| TUB       | -0.131 | -0.281 | -0.649 | -1.038 | -1.371 | 2.88E-31   |
| KCNAB3    | -0.295 | 0.114  | 0.264  | -0.793 | -1.09  | 6.63E-08   |
| FAM69B    | 0.003  | -0.429 | -0.615 | -0.7   | -0.418 | 5.13E-39   |
| CLASRP    | -0.194 | -0.026 | -0.071 | -0.625 | -0.685 | 1.18E-16   |
| TMEM200B  | 0.31   | -0.278 | -0.824 | -1.003 | -0.752 | 2.36E-11   |
| CSAD      | -0.459 | 0.02   | 0.23   | -0.752 | -0.724 | 7.42E-16   |
| LINC00472 | -0.552 | -0.234 | -0.301 | -0.888 | -0.902 | 0.00000755 |
| RTKN2     | -0.557 | -0.36  | -0.295 | -0.661 | -0.889 | 1.52E-11   |
| MIR6753   | -0.099 | 0.157  | 0.027  | -0.683 | -0.76  | 0.00398    |
| RPL37     | -0.34  | -0.188 | -0.096 | -0.623 | -0.515 | 0.000152   |
| MIS12     | -0.206 | -0.071 | -0.116 | -0.6   | -0.931 | 2.61E-27   |
| PLA2G4A   | 0.372  | 0.097  | -0.555 | -0.901 | -3.052 | 1.07E-123  |
| RPL21     | -0.109 | -0.072 | 0.059  | -0.637 | -0.775 | 1.24E-10   |
| PAQR6     | -0.16  | 0.424  | 0.107  | -0.619 | -0.87  | 5.78E-07   |
| MFSD2A    | -0.369 | -0.355 | -0.825 | -0.959 | -1.121 | 1.72E-21   |
| CTRL      | -0.446 | 0.01   | 0.106  | -0.737 | -0.597 | 0.00101    |
| MSS51     | -0.196 | -0.2   | 0.417  | -0.668 | -0.676 | 0.000004   |
| ART4      | 0.528  | 0.534  | -0.303 | -0.792 | -1.85  | 1.69E-105  |
| CRYGS     | -0.339 | -0.087 | 0.189  | -1.063 | -0.894 | 1.25E-08   |
| LRRC17    | 0.302  | -0.288 | -0.725 | -0.767 | 1.759  | 2.61E-71   |

|           |        |        |        |        |        |           |
|-----------|--------|--------|--------|--------|--------|-----------|
| MIR22HG   | -0.155 | 0.097  | -0.061 | -0.969 | -0.886 | 1.43E-21  |
| TAF1D     | -0.12  | 0.094  | 0.061  | -0.573 | -0.537 | 2.16E-08  |
| ATAD5     | 0.411  | 0.168  | -0.272 | -0.683 | -1.088 | 1.03E-75  |
| PKDCC     | -0.28  | -0.217 | -0.582 | -1.144 | -1.083 | 2.52E-10  |
| SETD6     | -0.301 | -0.361 | -0.002 | -0.617 | -0.345 | 0.00147   |
| TMEM136   | -0.447 | -0.03  | 0.01   | -0.638 | -0.349 | 1.5E-08   |
| CRY2      | 0.095  | 0.069  | -0.529 | -1.183 | -0.82  | 6.5E-51   |
| FASTKD3   | -0.264 | -0.14  | -0.185 | -0.624 | -0.743 | 2.89E-07  |
| KLRG1     | -0.165 | -0.796 | -0.764 | -1.175 | -1.477 | 1.21E-07  |
| DOK3      | -0.435 | -0.039 | -0.273 | -1.384 | -0.82  | 1.58E-15  |
| PKD1      | -0.357 | -0.347 | -0.111 | -0.81  | -0.247 | 5.85E-08  |
| KCTD13    | -0.494 | -0.056 | 0.067  | -0.851 | -0.346 | 7.22E-12  |
| TMSB15A   | -0.4   | -0.179 | -0.164 | -0.725 | -0.613 | 0.00628   |
| RELT      | 0.084  | -0.032 | -0.365 | -0.883 | -0.491 | 4.88E-21  |
| TEN1-CDK3 | 0.022  | 0.223  | 0.143  | -0.674 | -0.444 | 0.000654  |
| GULP1     | -0.262 | -0.265 | -0.671 | -0.942 | -1.418 | 2.62E-67  |
| RPS28     | -0.32  | -0.156 | -0.244 | -0.84  | -0.542 | 0.000117  |
| ZMYND19   | 0.002  | -0.053 | -0.509 | -0.783 | -0.594 | 1.04E-38  |
| CORO6     | -0.327 | 0.239  | 0.139  | -0.616 | 0.087  | 0.000867  |
| STARD4    | 0.203  | -0.103 | -0.297 | -0.69  | -0.564 | 1.39E-20  |
| ATP2B1    | 0.254  | 0.017  | -0.591 | -0.666 | -0.738 | 2.69E-45  |
| UNC119    | -0.445 | -0.145 | -0.091 | -0.631 | -0.147 | 2.53E-09  |
| RNA5SP383 | -0.066 | 0.301  | 0.336  | -0.658 | -0.696 | 0.000347  |
| C1orf54   | -0.413 | -0.215 | -0.23  | -0.631 | 0.245  | 0.0000239 |
| GAS5      | -0.32  | 0.04   | 0.117  | -0.681 | -0.383 | 0.00017   |
| RAPGEFL1  | -0.241 | 0.081  | -0.019 | -0.907 | -0.362 | 3.59E-08  |
| AGAP9     | -0.307 | -0.315 | -0.066 | -0.751 | -0.976 | 0.0000209 |
| FIRRE     | -0.417 | -0.098 | -0.083 | -0.661 | -0.471 | 0.0156    |
| BOLA3     | -0.293 | -0.198 | -0.263 | -0.586 | -0.904 | 5.35E-12  |
| SNORD11   | -0.127 | -0.279 | -0.375 | -0.69  | -0.865 | 0.0165    |
| FAM118A   | -0.408 | -0.034 | 0.11   | -0.713 | -0.544 | 2.55E-15  |
| FAM76B    | 0.081  | 0.122  | -0.102 | -0.627 | -0.512 | 2.76E-13  |
| DDX11     | -0.215 | -0.142 | -0.22  | -0.887 | -1.496 | 3.23E-85  |
| ROGDI     | -0.385 | -0.12  | -0.199 | -0.661 | -0.171 | 6.41E-08  |
| SNORA32   | -0.348 | 0.197  | 0.062  | -0.796 | -1.006 | 8.61E-10  |
| GABPB1-AS | -0.427 | 0.008  | 0.432  | -0.687 | -0.255 | 2.44E-09  |
| C1D       | -0.293 | -0.117 | -0.065 | -0.655 | -0.812 | 0.0000132 |
| C8orf59   | -0.367 | -0.161 | -0.099 | -0.686 | -0.659 | 0.0000205 |



|          |        |        |        |        |        |            |
|----------|--------|--------|--------|--------|--------|------------|
| RBM14    | 0.334  | 0.189  | -0.38  | -0.621 | -0.225 | 4.86E-15   |
| SNORD6   | -0.227 | -0.165 | -0.026 | -0.863 | -0.89  | 0.00131    |
| AADAT    | -0.093 | 0.09   | -0.087 | -0.739 | -0.185 | 0.0000506  |
| SNORA16A | -0.23  | 0.083  | 0.119  | -0.66  | -1.172 | 6.59E-10   |
| SNORD5   | -0.556 | 0.014  | -0.005 | -1.042 | -1.029 | 7.14E-11   |
| EGFL7    | -0.533 | -0.363 | -0.366 | -0.746 | -1.174 | 9.46E-40   |
| ATP5E    | -0.403 | -0.176 | -0.07  | -0.595 | -0.48  | 0.0189     |
| PRPF39   | -0.176 | 0.112  | -0.023 | -0.767 | -0.401 | 1.08E-09   |
| DACH1    | -0.26  | -0.148 | -1.007 | -1.05  | 0.805  | 2.02E-28   |
| CCDC189  | -0.452 | -0.147 | -0.37  | -1.062 | -0.902 | 2.82E-07   |
| RASGRP3  | 0.081  | -0.12  | -0.218 | -0.657 | 0.012  | 8.73E-10   |
| SNORD23  | 0.051  | 0.101  | -0.258 | -0.699 | -0.586 | 0.0221     |
| SNORD50B | -0.042 | 0.154  | 0.029  | -0.776 | -0.869 | 0.0000029  |
| SNORD62B | -0.205 | 0.023  | 0.189  | -0.798 | -0.265 | 0.0182     |
| CMC2     | -0.315 | -0.307 | -0.234 | -0.578 | -1.172 | 1.54E-14   |
| SNORD17  | -0.113 | -0.005 | -0.27  | -0.671 | -0.699 | 0.00152    |
| MIRLET7D | -0.49  | -0.002 | -0.234 | -0.85  | -0.542 | 0.0292     |
| SNORD45C | -0.159 | 0.196  | 0.244  | -0.693 | -0.92  | 0.00000465 |
| C9orf72  | 0.128  | -0.138 | -0.219 | -0.744 | -0.893 | 5.18E-13   |
| DPF1     | -0.029 | 0.066  | -0.332 | -0.648 | -1.749 | 3.39E-47   |
| TMSB4XP4 | -0.31  | -0.437 | -0.429 | -1.06  | -0.345 | 0.000279   |
| ATP8A1   | -0.246 | -0.037 | -0.451 | -0.635 | -1.667 | 8.62E-31   |
| ZNF467   | -0.55  | -0.833 | -0.506 | -0.71  | -1.783 | 2.69E-27   |
| MIR2116  | -0.1   | -0.275 | -0.406 | -0.681 | -0.58  | 0.0433     |
| MSANTD2  | -0.206 | -0.094 | -0.036 | -0.673 | -0.541 | 4.57E-09   |
| CCDC84   | -0.251 | 0.046  | 0.129  | -0.582 | -0.545 | 4.08E-07   |
| MIR4321  | -0.132 | -0.335 | -0.277 | -0.654 | -0.662 | 0.00269    |
| SNORD22  | -0.057 | 0.226  | -0.06  | -0.954 | -1.317 | 8.22E-14   |
| GNRH1    | -0.19  | 0.075  | 0.041  | -0.766 | -0.766 | 0.0000306  |
| PRR22    | -0.154 | 0.385  | -0.087 | -0.782 | -1.034 | 3.14E-10   |
| SNORD26  | -0.222 | 0.011  | -0.093 | -0.733 | -0.84  | 0.00855    |
| SNORD27  | 0.289  | 0.207  | 0.117  | -0.585 | -0.87  | 0.00000675 |
| SNORD28  | 0.02   | -0.141 | -0.067 | -0.976 | -1.261 | 4.19E-12   |
| AGAP4    | -0.523 | -0.074 | 0.038  | -0.932 | -0.495 | 3.27E-12   |
| MIR3176  | -0.57  | -0.121 | -0.356 | -1.576 | -1.001 | 9.14E-09   |
| SNORD30  | -0.335 | -0.188 | -0.34  | -1.272 | -1.659 | 4.25E-15   |
| UBE2T    | -0.454 | -0.529 | -0.534 | -0.942 | -1.523 | 1.91E-27   |
| CCT6P3   | -0.525 | -0.022 | 0.047  | -0.805 | -0.437 | 0.000079   |

|          |        |        |        |        |        |            |
|----------|--------|--------|--------|--------|--------|------------|
| HMGN3    | -0.42  | -0.335 | -0.239 | -0.585 | -0.656 | 0.00000241 |
| ZNF714   | -0.005 | -0.201 | -0.361 | -0.596 | -0.168 | 0.000548   |
| AKAP17A  | -0.261 | 0.157  | 0.073  | -0.614 | -0.509 | 3.73E-15   |
| MEG9     | -0.26  | 0.142  | 0.243  | -0.871 | -0.445 | 2.85E-09   |
| GIGYF1   | -0.31  | 0.133  | 0.093  | -0.721 | -0.598 | 1.25E-17   |
| NPIP5    | -0.173 | 0.092  | 0.052  | -0.697 | -0.545 | 0.00308    |
| NBPF14   | -0.365 | -0.205 | 0.143  | -0.685 | -0.007 | 0.00108    |
| SCDP1    | 0.322  | -0.482 | -0.778 | -0.63  | -0.092 | 2E-14      |
| CYP1A1   | 0.244  | -0.383 | -0.528 | -0.712 | -1.625 | 2.74E-17   |
| SNHG12   | -0.081 | 0.113  | 0.097  | -0.971 | -1.125 | 1.59E-21   |
| COMMD8   | -0.356 | -0.221 | -0.186 | -0.577 | -0.98  | 2.31E-09   |
| GPR135   | -0.442 | -0.11  | -0.031 | -1.044 | -0.976 | 2.95E-08   |
| BCL2L2   | -0.384 | 0.066  | -0.039 | -0.73  | -0.561 | 3.02E-12   |
| JAG2     | 0.454  | -0.321 | -0.637 | -0.732 | -1.002 | 9.08E-49   |
| MIR5587  | -0.479 | -0.189 | -0.031 | -1.134 | -1.207 | 0.00000163 |
| MROH6    | -0.107 | 0.26   | 0.094  | -0.725 | -0.507 | 0.0000764  |
| CHRNA10  | -0.22  | -0.118 | -0.072 | -0.834 | -0.574 | 0.0126     |
| DMPK     | -0.125 | 0.16   | 0.263  | -0.603 | -0.067 | 1.14E-07   |
| USP37    | 0.492  | 0.152  | -0.257 | -0.59  | -0.725 | 1.65E-54   |
| CCT6P1   | -0.349 | 0.05   | 0.082  | -0.694 | -0.394 | 0.0000554  |
| CACHD1   | 0.158  | -0.094 | -0.647 | -0.589 | -0.74  | 1.46E-21   |
| SNORA73A | -0.256 | 0.097  | 0.088  | -0.904 | -1.395 | 4.33E-18   |
| ELMO3    | -0.041 | -0.156 | -0.098 | -1.035 | -1.227 | 2.77E-23   |
| RSRP1    | -0.384 | -0.006 | 0.049  | -0.824 | -0.494 | 0.0000224  |
| LONRF1   | 0.125  | 0.305  | -0.115 | -0.622 | -0.308 | 1.6E-09    |
| SNORD32A | #N/A   | #N/A   | #N/A   | #N/A   | #N/A   | #N/A       |
| ITGAE    | -0.466 | -0.183 | -0.025 | -0.588 | -0.667 | 0.000112   |
| MCTP1    | -0.035 | 0.126  | -0.424 | -0.728 | -1.369 | 3.25E-61   |
| GMNN     | 0.042  | -0.272 | -0.614 | -0.711 | -1.376 | 1.4E-82    |
| CCNL2    | -0.454 | 0.205  | 0.195  | -0.716 | -0.548 | 7.2E-09    |
| SNORD35A | -0.18  | -0.226 | -0.148 | -0.856 | -1.038 | 0.000172   |
| SNORD14A | 0.001  | 0.277  | 0.156  | -0.629 | -1.149 | 6.07E-08   |
| MIR21    | 0.359  | 0.315  | 0.41   | -0.746 | -0.092 | 0.000262   |
| PDXP     | #N/A   | #N/A   | #N/A   | #N/A   | #N/A   | #N/A       |
| SNORD84  | -0.218 | 0.057  | -0.117 | -0.728 | -0.456 | 0.0293     |
| GOLT1B   | -0.102 | -0.015 | -0.055 | -0.576 | -0.615 | 7.13E-07   |
| PAM16    | -0.455 | -0.275 | -0.11  | -0.8   | -0.82  | 4.62E-08   |
| SNORD88A | -0.394 | -0.335 | -0.66  | -1.089 | -0.883 | 0.00234    |

|          |        |        |        |        |        |            |
|----------|--------|--------|--------|--------|--------|------------|
| SNORD88B | -0.117 | -0.295 | -0.241 | -1.158 | -1.353 | 2.5E-09    |
| SNHG3    | -0.156 | -0.126 | 0.024  | -0.88  | -1.03  | 1.38E-16   |
| SNORD86  | -0.457 | -0.421 | -0.266 | -1.518 | -1.325 | 1.58E-19   |
| SNORA81  | -0.007 | -0.044 | 0.07   | -0.765 | -0.879 | 0.000128   |
| SNORA27  | -0.406 | 0      | -0.255 | -1.038 | -0.947 | 0.000187   |
| DLG4     | -0.57  | -0.16  | -0.145 | -0.619 | -0.474 | 6.13E-16   |
| GABRE    | -0.292 | 0.103  | 0.22   | -0.771 | 0.023  | 0.00000259 |
| ABHD3    | -0.236 | 0.041  | -0.021 | -0.85  | -1.361 | 8.39E-29   |
| SEC61G   | -0.286 | -0.167 | -0.038 | -0.601 | -0.998 | 4.59E-07   |
| DLX1     | 0.252  | -0.597 | -0.752 | -0.78  | -0.656 | 7.58E-09   |
| SNORA61  | -0.226 | 0.053  | 0.027  | -1.161 | -1.147 | 4.74E-18   |
| SNORA53  | -0.378 | 0.096  | -0.124 | -0.915 | -0.778 | 0.00159    |
| SNORA48  | -0.178 | 0.089  | 0.044  | -0.849 | -0.788 | 0.00000482 |
| MIR25    | -0.077 | -0.278 | -0.422 | -1.215 | -0.608 | 0.0000242  |
| SNORD110 | -0.224 | 0.065  | -0.149 | -1.257 | -1.151 | 6.21E-12   |
| SNORD10  | -0.466 | -0.256 | -0.266 | -0.91  | -0.572 | 0.00907    |
| SNORD99  | 0.074  | 0.033  | 0.095  | -0.874 | -0.972 | 2.92E-07   |
| RECQL4   | -0.203 | 0.018  | -0.203 | -0.836 | -1.196 | 4.05E-39   |
| RAD54L   | 0.082  | 0.037  | -0.253 | -0.813 | -1.474 | 2.88E-94   |
| SNORA51  | -0.25  | -0.391 | -0.139 | -0.895 | -1.103 | 0.0000711  |
| SNORA44  | 0.068  | 0.099  | 0.15   | -0.911 | -0.769 | 0.00000277 |
| ADCK5    | -0.565 | -0.032 | -0.138 | -0.739 | -0.705 | 2.36E-10   |
| PPP1R3E  | -0.562 | -0.153 | -0.119 | -0.757 | -0.935 | 7.17E-12   |
| SDHAP1   | -0.199 | 0.135  | 0.044  | -0.92  | -0.793 | 2.05E-13   |
| SNORA70  | -0.203 | -0.078 | 0.07   | -0.811 | -0.903 | 2.61E-07   |
| IL20RB   | -0.145 | 0.121  | -0.057 | -0.679 | -0.773 | 0.0021     |
| SNORA40  | -0.133 | 0.124  | 0.125  | -0.623 | -0.845 | 2.73E-11   |
| CENPV    | -0.064 | -0.233 | -0.257 | -0.603 | -0.188 | 0.000992   |
| SNORA69  | -0.138 | -0.136 | -0.179 | -1.017 | -0.754 | 0.000845   |
| SVIP     | -0.329 | -0.221 | -0.275 | -0.613 | -0.528 | 0.00014    |
| SNORA71B | -0.421 | -0.205 | -0.114 | -0.859 | -0.961 | 0.00119    |
| HERC2P4  | -0.538 | -0.067 | -0.175 | -1.102 | -1.029 | 9.25E-13   |
| SNORD4A  | -0.374 | -0.019 | -0.042 | -1.045 | -1.071 | 0.00000276 |
| SNORA62  | -0.205 | 0.336  | 0.242  | -0.725 | -0.896 | 2.42E-07   |
| SNORA24  | -0.268 | -0.187 | -0.205 | -0.724 | -1.318 | 0.00000644 |
| TSTD1    | -0.461 | -0.345 | -0.209 | -0.672 | -0.369 | 0.00367    |
| SNORA31  | -0.464 | 0.08   | -0.035 | -0.699 | -0.848 | 0.00433    |
| SNORD102 | -0.343 | -0.049 | 0.034  | -0.817 | -1.212 | 6.47E-08   |

|           |        |        |        |        |        |            |
|-----------|--------|--------|--------|--------|--------|------------|
| SNORA73B  | 0.059  | 0.181  | 0.172  | -0.578 | -1.016 | 3.24E-08   |
| SNORD65   | -0.15  | -0.06  | 0.133  | -0.671 | -0.838 | 0.000296   |
| UBE2SP2   | -0.313 | -0.687 | -0.955 | -0.84  | -0.797 | 2.88E-10   |
| DHCR24    | 0.205  | -0.324 | -0.75  | -0.869 | -0.496 | 8.12E-46   |
| FTX       | -0.364 | 0.177  | 0.152  | -0.597 | -0.557 | 9.06E-22   |
| SNORA18   | -0.119 | 0.037  | 0.095  | -0.8   | -0.867 | 4.77E-11   |
| PPIEL     | -0.384 | -0.127 | 0.141  | -0.749 | -0.505 | 0.000515   |
| SNORA2A   | -0.189 | -0.441 | -0.01  | -0.63  | -0.852 | 0.0165     |
| MFSD7     | -0.423 | -0.017 | -0.038 | -0.662 | -0.506 | 0.00204    |
| EID3      | 0.018  | 0.198  | -0.011 | -0.73  | -0.706 | 0.000499   |
| SNORA1    | -0.157 | 0.054  | -0.026 | -0.817 | -0.858 | 0.0000452  |
| PARP6     | -0.494 | -0.117 | -0.013 | -0.655 | -0.332 | 9.14E-08   |
| SPRY1     | -0.167 | 0.079  | -0.368 | -0.897 | -1.087 | 2.32E-43   |
| TMEM50B   | -0.087 | -0.233 | -0.189 | -0.698 | -0.655 | 7.76E-12   |
| C14orf132 | 0.271  | -0.15  | -0.442 | -0.656 | -0.807 | 0.000025   |
| SNORD36C  | -0.208 | -0.156 | 0.076  | -0.796 | -0.807 | 0.00303    |
| TEF       | 0.197  | 0.085  | -0.402 | -0.952 | -0.021 | 1.19E-13   |
| CCNL1     | -0.307 | 0.12   | 0.011  | -0.757 | -0.584 | 1.27E-11   |
| SNORD36A  | -0.476 | -0.004 | -0.132 | -1.297 | -1.03  | 7.27E-13   |
| HCN3      | -0.135 | -0.274 | 0.035  | -0.749 | -0.713 | 0.0000828  |
| MMD       | 0.238  | 0.12   | -0.42  | -0.767 | -0.83  | 1.75E-31   |
| SNORD45B  | -0.027 | 0.356  | 0.371  | -0.78  | -0.816 | 4.4E-11    |
| SNORD45A  | -0.321 | 0.147  | 0.075  | -0.914 | -0.939 | 2.48E-07   |
| SCARNA12  | -0.407 | -0.035 | -0.429 | -1.162 | -1.249 | 2.75E-08   |
| GOLGA8H   | -0.467 | -0.116 | 0.188  | -0.755 | -0.722 | 0.0000438  |
| FREM3     | 0.033  | -0.273 | -0.822 | -1.49  | -3.147 | 5.52E-63   |
| TIMM23B   | -0.003 | 0.091  | -0.043 | -0.635 | -0.671 | 3.23E-16   |
| SNORD43   | -0.314 | -0.005 | 0.024  | -0.996 | -1.287 | 2.04E-08   |
| SNORD49A  | -0.327 | -0.125 | 0.154  | -0.768 | -0.913 | 0.0000188  |
| NPTN-IT1  | -0.414 | -0.107 | -0.109 | -1.238 | -0.837 | 8.75E-11   |
| SNHG4     | -0.54  | -0.256 | -0.035 | -0.888 | -0.649 | 5.14E-08   |
| PDIA2     | -0.097 | -0.173 | -0.522 | -1.21  | -0.776 | 0.00000045 |
| NR2F1     | -0.389 | -0.33  | -0.666 | -0.717 | -1.919 | 7.98E-67   |
| PCDH7     | 0.269  | -0.415 | -1.112 | -1.081 | -2.279 | 4.72E-45   |
| SNORD58C  | -0.518 | 0.042  | -0.059 | -0.998 | -0.906 | 0.0000046  |
| SNORD56   | -0.059 | 0.071  | 0.054  | -0.784 | -0.851 | 0.000942   |
| SNORD57   | -0.286 | -0.288 | -0.2   | -0.963 | -1.155 | 0.000212   |
| PCDH9     | -0.139 | -0.191 | -0.977 | -0.716 | -0.725 | 8.72E-21   |

|           |        |        |        |        |        |            |
|-----------|--------|--------|--------|--------|--------|------------|
| ZSWIM5    | 0.38   | -0.215 | -0.832 | -0.925 | -1.594 | 1.03E-48   |
| SNORD54   | 0.098  | 0.223  | 0.101  | -0.646 | -0.637 | 0.00104    |
| SNORA57   | -0.295 | 0.05   | 0.221  | -0.944 | -0.993 | 0.00000209 |
| SNORD58A  | -0.009 | 0.146  | 0.238  | -0.72  | -0.805 | 0.000076   |
| SNORA64   | -0.243 | -0.164 | -0.049 | -0.837 | -0.813 | 0.00722    |
| C7orf43   | -0.375 | 0.177  | -0.13  | -0.725 | -0.47  | 3.08E-16   |
| ZNF169    | -0.287 | -0.17  | 0.045  | -0.584 | -0.462 | 0.0012     |
| MRI1      | -0.479 | -0.065 | -0.065 | -0.655 | -0.644 | 5.04E-18   |
| OSTC      | -0.253 | -0.173 | -0.18  | -0.588 | -0.685 | 0.00000311 |
| MIR589    | #N/A   | #N/A   | #N/A   | #N/A   | #N/A   | #N/A       |
| MIR590    | 0.1    | 0.413  | 0.433  | -0.644 | -0.415 | 0.0000938  |
| CAPZA2    | -0.23  | -0.255 | -0.383 | -0.755 | -1.019 | 1.2E-18    |
| LY6G5B    | 0.189  | 0.158  | 0.239  | -0.905 | -0.493 | 2.27E-12   |
| ULK3      | -0.26  | 0.031  | -0.067 | -0.614 | -0.726 | 8.02E-25   |
| FAM117A   | 0.223  | -0.319 | -0.633 | -0.608 | -1.603 | 2.92E-45   |
| ABRACL    | -0.083 | -0.076 | -0.174 | -0.66  | -0.624 | 1.58E-07   |
| SNORD12B  | -0.031 | 0.038  | 0.08   | -0.851 | -0.615 | 0.00198    |
| LENG8     | -0.521 | -0.015 | 0.11   | -0.827 | -0.505 | 6.26E-12   |
| DGKD      | -0.156 | 0.281  | -0.06  | -0.624 | -0.365 | 2.13E-35   |
| CTHRC1    | 0.171  | -0.192 | -0.497 | -0.653 | 0.568  | 2.34E-35   |
| VARS2     | -0.454 | -0.161 | 0.005  | -0.653 | -0.979 | 1.54E-31   |
| SMYD4     | -0.398 | -0.136 | -0.283 | -0.595 | -0.681 | 7.47E-17   |
| SS18L1    | 0.205  | 0.198  | 0.062  | -0.633 | -0.63  | 1.41E-15   |
| RPS15AP24 | #N/A   | #N/A   | #N/A   | #N/A   | #N/A   | #N/A       |
| PRADC1    | -0.246 | -0.393 | -0.494 | -0.651 | -1.355 | 2.26E-48   |
| FAM219B   | -0.499 | 0.003  | 0.036  | -0.608 | -0.289 | 2.24E-08   |
| NOTCH2NL  | #N/A   | #N/A   | #N/A   | #N/A   | #N/A   | #N/A       |
| SLC25A33  | -0.248 | -0.204 | -0.448 | -0.668 | -0.428 | 0.0000111  |
| SYDE1     | -0.395 | -0.135 | -0.352 | -0.663 | -0.493 | 7.09E-19   |
| SNORD68   | -0.126 | 0.136  | 0.131  | -0.713 | -0.734 | 0.00209    |
| EEF1E1    | -0.286 | -0.207 | -0.338 | -0.915 | -1.538 | 3.28E-27   |
| CCDC130   | -0.434 | 0.158  | -0.004 | -0.771 | -0.857 | 1.57E-37   |
| SNORA13   | 0.002  | 0.117  | -0.104 | -0.57  | -0.884 | 0.00395    |
| MBOAT1    | -0.241 | 0.075  | 0.094  | -0.682 | -1.08  | 4.65E-11   |
| C9orf142  | -0.25  | -0.138 | -0.189 | -0.597 | -1.128 | 4.58E-40   |
| SNORA8    | -0.416 | 0.064  | 0.11   | -0.945 | -0.927 | 6.09E-15   |
| BTBD19    | 0.17   | 0.025  | 0.32   | -0.584 | 0.021  | 0.0000925  |
| KIF1C     | -0.409 | -0.173 | -0.018 | -0.597 | -0.343 | 0.0000996  |

|           |        |        |        |        |        |            |
|-----------|--------|--------|--------|--------|--------|------------|
| AQP7P1    | -0.507 | -0.031 | 0.181  | -0.562 | -0.855 | 0.000693   |
| TMEM100   | 0.238  | -0.713 | -1.758 | -2.047 | -3.216 | 2.04E-47   |
| ZGLP1     | -0.345 | 0.259  | 0.291  | -0.908 | -0.905 | 1.9E-12    |
| E2F1      | 0.526  | 0.049  | -0.852 | -1.497 | -1.559 | 7.89E-190  |
| LTK       | 0.004  | -0.015 | -0.238 | -0.722 | -2.437 | 2.5E-38    |
| CACNB1    | -0.268 | -0.142 | -0.09  | -0.792 | -0.645 | 1.79E-07   |
| SNORD15B  | -0.503 | 0.017  | -0.221 | -0.677 | -0.867 | 0.0123     |
| CDC14A    | -0.01  | 0.315  | -0.54  | -0.833 | -0.401 | 5.58E-40   |
| PTHLH     | 0.532  | -0.31  | -0.598 | -0.591 | -0.368 | 4.75E-15   |
| CCDC17    | -0.363 | 0.088  | 0.049  | -0.874 | -1.079 | 8.3E-09    |
| CEP85     | -0.428 | -0.336 | -0.426 | -0.768 | -1.183 | 7.05E-63   |
| HAGHL     | -0.321 | -0.032 | -0.146 | -0.599 | 0.214  | 0.015      |
| INE1      | -0.325 | -0.032 | -0.053 | -0.994 | -0.683 | 0.00000632 |
| NAB2      | 0.463  | -0.014 | -0.442 | -0.619 | -0.786 | 4.73E-29   |
| LMO7      | -0.061 | -0.054 | -0.616 | -0.605 | -1.076 | 2.17E-45   |
| ZNF841    | -0.212 | 0.067  | 0.114  | -0.688 | -0.464 | 7.38E-10   |
| NDUFA4    | -0.358 | -0.114 | -0.043 | -0.564 | -0.498 | 0.0205     |
| SLC43A1   | -0.576 | -0.296 | -0.423 | -0.716 | -0.481 | 1.18E-10   |
| CGRRF1    | -0.047 | -0.093 | -0.099 | -0.614 | -0.567 | 0.000041   |
| ZNF431    | -0.076 | -0.098 | -0.12  | -0.728 | -0.276 | 0.000022   |
| DCUN1D2   | -0.136 | -0.183 | -0.16  | -0.677 | -0.514 | 7.72E-08   |
| MALAT1    | -0.375 | 0.173  | 0.389  | -0.571 | -0.353 | 6.94E-07   |
| MBNL1-AS1 | -0.425 | -0.515 | -0.476 | -0.848 | -1.533 | 2.83E-21   |
| PLEKHG2   | -0.358 | -0.192 | -0.227 | -0.68  | -0.422 | 5.83E-12   |
| RN7SL81P  | -0.452 | 0.059  | 0.248  | -0.834 | -0.483 | 0.00241    |
| SNORA6    | -0.316 | -0.173 | -0.083 | -1.079 | -1.361 | 1.86E-12   |
| SNORA10   | -0.376 | 0.042  | -0.283 | -0.974 | -1.286 | 0.0000014  |
| MTRNR2L12 | -0.434 | -0.47  | 0.116  | -0.945 | -0.676 | 0.000916   |
| LRRC70    | -0.329 | -0.394 | -0.44  | -0.673 | -0.57  | 0.000728   |
| KIFC2     | -0.536 | 0.148  | 0.291  | -0.625 | -0.333 | 6.47E-09   |
| IGLV5-52  | -0.355 | 0.046  | 0.218  | -0.675 | -0.252 | 0.0000322  |
| TSPAN13   | 0.345  | -0.102 | -0.665 | -0.899 | -1.207 | 1.2E-73    |
| EPHA5     | -0.11  | -0.142 | -0.61  | -0.831 | -1.448 | 2.91E-27   |
| PASK      | -0.279 | -0.099 | -0.396 | -1.129 | -1.688 | 2.62E-89   |
| DYNLL1    | -0.07  | -0.228 | -0.249 | -0.649 | -0.288 | 0.0000163  |
| SYTL4     | -0.043 | 0.001  | -0.359 | -0.617 | -0.834 | 2.32E-43   |
| RPL37AP1  | -0.429 | -0.38  | -0.172 | -0.583 | -0.503 | 0.00033    |
| MIR100HG  | -0.354 | -0.346 | -0.211 | -0.778 | -0.627 | 5.13E-09   |

|           |        |        |        |        |        |            |
|-----------|--------|--------|--------|--------|--------|------------|
| GPR3      | -0.58  | -0.411 | -0.73  | -1.15  | -1.06  | 5.22E-14   |
| LCAT      | 0.291  | 0.25   | 0.336  | -0.768 | -0.274 | 2.47E-14   |
| STRIP2    | -0.268 | -0.003 | -0.165 | -0.843 | -0.445 | 1.42E-11   |
| CHSY3     | 0.528  | -0.019 | -0.811 | -0.99  | -0.906 | 4.91E-35   |
| TONSL     | -0.021 | -0.133 | -0.444 | -0.929 | -1.104 | 1.27E-36   |
| CAPRIN2   | 0.161  | -0.25  | 0.04   | -0.661 | -0.707 | 3.57E-14   |
| CPNE7     | -0.311 | -0.073 | 0.045  | -0.716 | 0.045  | 0.00000112 |
| CCNT2     | -0.119 | 0.1    | 0.052  | -0.643 | -0.443 | 6.25E-12   |
| RAD9A     | -0.424 | -0.21  | -0.281 | -1.161 | -1.309 | 1.78E-36   |
| HSD17B7P2 | -0.51  | -0.246 | -0.211 | -0.931 | -0.565 | 0.00284    |
| SLC30A3   | 0.16   | -0.095 | -0.493 | -0.663 | -1.691 | 1.08E-12   |
| SLC17A9   | -0.357 | -0.315 | -0.298 | -0.995 | -1.034 | 5.07E-27   |
| NAPB      | -0.317 | 0.098  | 0.064  | -0.622 | -0.628 | 4.26E-08   |
| ZBTB16    | 0.387  | 0.264  | -0.145 | -0.764 | -1.942 | 7.68E-80   |
| CXCL1     | 0.05   | 0.265  | -0.182 | -0.633 | -0.194 | 7.34E-23   |
| ZNF141    | -0.191 | -0.05  | -0.18  | -0.83  | -0.276 | 0.00000274 |
| OTUD3     | 0.22   | 0.039  | 0.024  | -0.66  | -0.758 | 5.61E-40   |
| SNORD83B  | -0.3   | 0.194  | 0.01   | -1.038 | -1.164 | 9.24E-14   |
| BLOC1S5   | -0.022 | -0.038 | -0.407 | -0.659 | -1.557 | 7.65E-93   |
| ZNF335    | -0.115 | 0.1    | -0.081 | -0.629 | -0.822 | 6.54E-32   |
| LAG3      | -0.311 | -0.354 | -0.307 | -1.081 | -1.342 | 4.96E-10   |
| TRAK2     | -0.486 | -0.091 | -0.04  | -0.75  | -0.543 | 0.000361   |
| PLPP4     | 0.402  | -0.043 | -0.388 | -0.603 | -0.441 | 7.74E-27   |
| CMTM8     | 0.307  | -0.335 | -1.062 | -1.088 | -1.162 | 9.19E-38   |
| SLC26A6   | -0.488 | -0.271 | -0.261 | -0.999 | -1.061 | 6.17E-19   |
| SNORD14B  | -0.194 | 0.181  | 0.147  | -0.72  | -1.163 | 4.04E-08   |
| NKTR      | -0.255 | -0.047 | 0.02   | -0.796 | -0.439 | 1.77E-11   |
| TEX30     | -0.374 | -0.062 | -0.173 | -1.019 | -1.398 | 1.05E-19   |
| PI4KAP1   | -0.255 | 0.482  | 0.229  | -0.75  | -0.686 | 5.36E-25   |
| ADIPOR2   | 0.128  | -0.141 | -0.478 | -0.638 | -1.048 | 4.4E-43    |
| NPIPP1    | -0.338 | -0.123 | -0.347 | -0.914 | -0.521 | 0.00000702 |
| TDRD10    | 0.247  | 0.056  | -0.101 | -0.609 | -1.201 | 3.95E-22   |
| NEBL      | 0.379  | -0.052 | -0.416 | -0.616 | -1.344 | 3.13E-59   |
| SNORD46   | -0.331 | -0.281 | -0.197 | -1.113 | -1.256 | 0.00000163 |
| SNORD38B  | -0.436 | -0.22  | -0.001 | -0.868 | -0.965 | 0.00009    |
| SNORD38A  | -0.503 | -0.199 | 0.132  | -0.824 | -0.895 | 0.000885   |
| EBLN2     | -0.104 | -0.019 | 0.285  | -0.728 | -0.455 | 0.000595   |
| VCPKMT    | -0.128 | 0.004  | -0.076 | -0.588 | -0.823 | 7.95E-09   |

|          |        |        |        |        |        |            |
|----------|--------|--------|--------|--------|--------|------------|
| GRB14    | -0.087 | -0.325 | -0.433 | -0.839 | -1.284 | 4.37E-39   |
| EFNB2    | 0.45   | -0.129 | -0.769 | -0.593 | -1.098 | 3.23E-89   |
| CCDC144A | -0.493 | -0.033 | 0.175  | -0.857 | -0.593 | 0.000022   |
| RPL24P2  | #N/A   | #N/A   | #N/A   | #N/A   | #N/A   | #N/A       |
| UACA     | -0.187 | -0.132 | -0.311 | -0.873 | -0.307 | 3.39E-11   |
| ACAP3    | -0.398 | -0.13  | -0.117 | -0.933 | -0.429 | 8.33E-09   |
| MIR4292  | -0.098 | 0.141  | -0.085 | -0.953 | -0.766 | 0.0000769  |
| TMEM37   | 0.087  | -0.65  | -0.977 | -1.057 | -2.891 | 3.2E-55    |
| RPS10P3  | -0.279 | -0.339 | -0.252 | -0.581 | -0.346 | 0.0229     |
| CREBZF   | -0.221 | 0.069  | 0.055  | -0.772 | -0.643 | 3.7E-12    |
| NPFF     | -0.538 | -0.196 | 0.306  | -0.756 | -0.766 | 0.00000127 |
| ZNF333   | -0.296 | 0.071  | -0.085 | -0.719 | -0.819 | 9.69E-14   |
| ARGLU1   | -0.36  | 0.005  | -0.029 | -0.896 | -0.502 | 3.14E-10   |
| ADGRL2   | -0.226 | -0.134 | -0.696 | -0.797 | -1.406 | 3.34E-68   |
| KRT10    | -0.211 | -0.237 | -0.19  | -0.606 | -0.583 | 0.0000964  |
| CD58     | -0.008 | 0.057  | -0.154 | -0.893 | -0.828 | 7.01E-12   |
| ABR      | 0.239  | -0.07  | 0.072  | 0.479  | 0.795  | 1.04E-24   |
| ACHE     | 0.23   | 0.719  | 0.408  | 0.29   | 1.071  | 0.00000255 |
| ACTN1    | 0.4    | 0.061  | 0.043  | 0.49   | 0.996  | 2.88E-19   |
| ADA      | 0.308  | 0.087  | 0.096  | 0.224  | 1      | 1.58E-41   |
| AP2B1    | 0.299  | 0.102  | 0.094  | 0.456  | 0.864  | 4.54E-18   |
| ANPEP    | 0.351  | 0.052  | -0.012 | 0.408  | 1.049  | 6.31E-29   |
| ANXA3    | -0.092 | -0.152 | 0.126  | 0.308  | 1.646  | 4E-98      |
| APBB2    | 0.378  | -0.142 | 0.247  | 0.43   | 0.925  | 4.73E-65   |
| SHROOM2  | 0.163  | 0.034  | 0.114  | 0.478  | 1.172  | 2.6E-31    |
| ARG2     | -0.304 | -0.034 | 0.276  | 0.522  | 0.878  | 9.01E-21   |
| ARHGAP5  | 0.4    | 0.206  | 0.092  | 0.208  | 0.921  | 7.1E-41    |
| ARSD     | 0.347  | 0.109  | 0.155  | 0.541  | 1.156  | 6.2E-49    |
| ARSE     | 0.346  | 0.074  | 0.035  | 0.28   | 0.884  | 0.00033    |
| BACH1    | 0.23   | 0.279  | 0.275  | 0.53   | 0.998  | 2.66E-36   |
| BCL2A1   | -0.106 | -0.257 | 0.089  | 0.339  | 1.801  | 3.35E-17   |
| PRDM1    | 0.43   | 0.761  | 0.415  | 0.06   | 1.151  | 4.89E-23   |
| BMX      | -0.058 | -0.167 | 0.032  | 0.407  | 0.937  | 7.95E-44   |
| BOK      | 0.194  | 0.013  | 0.223  | 0.45   | 0.971  | 1.54E-50   |
| ZFP36L2  | -0.183 | 0.393  | 0.014  | -0.018 | 0.7    | 2.91E-24   |
| BST1     | -0.425 | -0.122 | 0.082  | 0.53   | 0.952  | 1.68E-46   |
| CALD1    | 0.345  | 0.024  | 0.017  | 0.274  | 0.953  | 4.91E-32   |
| CAPG     | 0.289  | 0.191  | 0.12   | 0.546  | 1.146  | 9.16E-31   |



|         |        |        |        |        |       |            |
|---------|--------|--------|--------|--------|-------|------------|
| CAPN2   | 0.179  | 0.065  | 0.218  | 0.549  | 1.275 | 1.04E-80   |
| CASP3   | 0.098  | 0.271  | 0.344  | 0.542  | 0.909 | 7.52E-53   |
| CAV1    | -0.221 | 0.049  | 0.249  | 0.554  | 1.076 | 3.98E-54   |
| CCIN    | 0.231  | 0.071  | -0.051 | 0.56   | 1.266 | 2.55E-22   |
| CD34    | -0.042 | 0.042  | 0.015  | 0.261  | 0.73  | 3.28E-62   |
| SCARB2  | 0.215  | 0.098  | 0.003  | 0.342  | 0.891 | 1.35E-52   |
| ENTPD1  | 0.333  | -0.055 | -0.052 | -0.169 | 0.951 | 5.21E-07   |
| CD44    | 0.327  | 0.121  | -0.009 | 0.348  | 0.817 | 1.06E-30   |
| CD74    | -0.221 | 0.341  | 0.209  | 0.463  | 1.145 | 0.00000405 |
| LRBA    | 0.387  | 0.13   | 0.084  | 0.549  | 0.833 | 1E-19      |
| CDH2    | 0.466  | 0.151  | -0.159 | 0.274  | 1.23  | 5.36E-52   |
| CDH5    | 0.296  | 0.123  | 0.162  | 0.555  | 1.134 | 3.49E-58   |
| CDH11   | 0.058  | 0.173  | 0.157  | 0.536  | 2.215 | 1.8E-250   |
| CDH13   | 0.127  | 0.06   | -0.007 | 0.434  | 1.13  | 6.37E-62   |
| CHRNA1  | #N/A   | #N/A   | #N/A   | #N/A   | #N/A  | #N/A       |
| TPP1    | 0.203  | 0.17   | 0.194  | 0.461  | 1.02  | 2.47E-43   |
| COL4A5  | 0.176  | 0.167  | 0.305  | 0.37   | 0.909 | 2.32E-42   |
| COL4A6  | 0.231  | 0.088  | 0.158  | 0.355  | 0.871 | 1.99E-34   |
| COL5A2  | 0.165  | 0.155  | 0.097  | 0.521  | 0.914 | 8.48E-21   |
| COL12A1 | 0.208  | 0.318  | 0.459  | 0.326  | 1.487 | 2.72E-30   |
| ATF6B   | -0.153 | 0.008  | 0.061  | 0.315  | 0.697 | 1.23E-50   |
| CSF1    | 0.517  | 1.239  | 0.384  | -0.155 | 1.945 | 2.62E-134  |
| CSRP1   | 0.261  | -0.012 | 0.031  | 0.362  | 0.884 | 2.16E-35   |
| CTSB    | 0.246  | 0.054  | 0.004  | 0.405  | 0.971 | 5.72E-55   |
| CTSK    | 0.175  | 0.331  | 0.277  | -0.022 | 1.581 | 3.76E-59   |
| CTSO    | 0.271  | 0.342  | 0.219  | 0.537  | 1.147 | 4.85E-26   |
| CXADR   | -0.415 | -0.526 | -0.075 | -0.033 | 1.303 | 7.64E-72   |
| CYLD    | 0.231  | 0.638  | 0.385  | 0.312  | 0.682 | 2.5E-27    |
| DAPK3   | 0.345  | 0.303  | 0.263  | 0.483  | 1.007 | 5.21E-42   |
| DDX1    | 0.389  | 0.118  | 0.099  | 0.532  | 0.694 | 1.68E-15   |
| DUSP4   | 0.297  | 0.264  | 0.425  | 0.453  | 1.051 | 7.56E-44   |
| DUSP5   | -0.042 | 0.678  | 0.517  | 0.374  | 1.027 | 4.03E-53   |
| DUSP8   | 0.16   | 0.711  | 0.757  | 0.09   | 1.221 | 5.89E-18   |
| ECE1    | 0.27   | 0.083  | 0.039  | 0.477  | 0.903 | 1.98E-21   |
| S1PR3   | 0.04   | 0.495  | 0.506  | 0.543  | 0.9   | 2.91E-36   |
| DMTN    | -0.035 | -0.03  | 0.033  | 0.342  | 1.464 | 1.7E-45    |
| EPHB2   | 0.226  | -0.199 | -0.071 | 0.444  | 1.161 | 7.2E-59    |
| ETS2    | 0.338  | 0.42   | 0.334  | 0.359  | 1.136 | 9.03E-57   |

|          |        |        |        |        |       |            |
|----------|--------|--------|--------|--------|-------|------------|
| ETV1     | 0.118  | -0.315 | 0.278  | 0.394  | 0.881 | 3.42E-11   |
| EXTL3    | 0.059  | -0.169 | -0.064 | 0.319  | 0.911 | 1.49E-48   |
| F2RL1    | -0.211 | 0.569  | 0.316  | 0.324  | 1.43  | 3.39E-71   |
| FAP      | 0.212  | -0.016 | 0.023  | 0.274  | 1.235 | 2.53E-73   |
| FAT1     | 0.318  | 0.12   | 0.191  | 0.27   | 1.14  | 7.61E-18   |
| FBP1     | -0.234 | -0.209 | -0.454 | 0.155  | 1.062 | 3.97E-14   |
| FKBP1A   | 0.268  | 0.074  | -0.003 | 0.245  | 0.799 | 2.99E-60   |
| FLNB     | 0.041  | -0.069 | 0.132  | 0.253  | 0.924 | 7.81E-36   |
| FLNC     | 0.377  | 0.293  | 0.364  | 0.49   | 0.893 | 5.26E-15   |
| FLT4     | -0.071 | -0.217 | -0.075 | 0.065  | 0.988 | 3.45E-17   |
| FYN      | 0.224  | 0.026  | 0.256  | 0.505  | 0.992 | 1.87E-64   |
| GAMT     | -0.091 | 0.056  | 0.269  | 0.552  | 1.049 | 5.63E-34   |
| GAS6     | 0.212  | 0.162  | 0.22   | 0.401  | 1.647 | 6.9E-216   |
| GBP1     | 0.239  | 0.367  | 0.266  | 0.454  | 0.9   | 3.39E-20   |
| GBP2     | 0.546  | 0.259  | 0.091  | 0.46   | 1.89  | 6.4E-22    |
| GCHFR    | -0.169 | -0.015 | 0.109  | -0.09  | 2.012 | 4.21E-49   |
| GGT1     | -0.088 | 0.095  | 0.237  | 0.392  | 1.155 | 0.0000289  |
| GLRB     | 0.088  | 0.193  | 0.287  | 0.259  | 1.06  | 1.6E-24    |
| GM2A     | 0.218  | 0.099  | 0.129  | 0.554  | 0.69  | 2.73E-23   |
| GNA12    | 0.263  | -0.031 | -0.043 | 0.34   | 0.808 | 2.5E-30    |
| GNAI2    | 0.214  | 0.039  | 0.042  | 0.44   | 0.886 | 3.1E-25    |
| GRK5     | 0.219  | -0.353 | -0.168 | 0.153  | 1.055 | 4.37E-91   |
| GPS2     | -0.339 | 0.229  | -0.061 | -0.152 | 0.946 | 0.000071   |
| GTF2IP1  | 0.322  | 0.072  | 0.278  | 0.331  | 0.928 | 2.44E-11   |
| GYPC     | -0.309 | -0.161 | -0.035 | 0.044  | 0.968 | 0.00000277 |
| SERPIND1 | 0.176  | -0.089 | -0.155 | 0.411  | 2.693 | 2.23E-67   |
| HLX      | 0.211  | 0.548  | -0.217 | 0.054  | 1.107 | 1.02E-23   |
| HMGA1    | 0.129  | 0.007  | 0.081  | 0.47   | 0.947 | 9.79E-28   |
| FOXA1    | 0.291  | -0.29  | -0.461 | -0.436 | 1.001 | 9.02E-16   |
| HNMT     | -0.233 | -0.205 | -0.012 | 0.095  | 0.848 | 0.0000424  |
| DNAJA1   | 0.235  | 0.245  | 0.221  | 0.52   | 0.728 | 7.96E-13   |
| TNC      | 0.512  | 0.138  | -0.034 | -0.016 | 1.301 | 5.12E-20   |
| IGBP1    | 0.178  | 0.152  | 0.254  | 0.518  | 0.955 | 2.28E-69   |
| IL15     | -0.049 | 0.746  | 0.866  | 0.542  | 1.459 | 3.03E-11   |
| ITGA6    | 0.201  | 0.076  | 0.084  | 0.503  | 1.102 | 3.11E-51   |
| IRF2     | 0.086  | 0.607  | 0.518  | 0.548  | 0.936 | 1.59E-14   |
| ISG20    | 0.137  | -0.042 | 0.156  | 0.458  | 1.412 | 1.94E-15   |
| JUND     | 0.272  | 0.199  | 0.034  | 0.208  | 0.964 | 1.77E-21   |

|        |        |        |        |        |       |            |
|--------|--------|--------|--------|--------|-------|------------|
| KCNJ12 | 0.348  | -0.416 | -0.114 | 0.32   | 0.906 | 5.21E-14   |
| KIF3C  | 0.196  | -0.203 | -0.152 | 0.222  | 0.885 | 1.87E-35   |
| LAMA3  | -0.028 | 0.448  | 0.646  | 0.53   | 0.999 | 1.11E-15   |
| LAMA4  | 0.159  | 0.001  | 0.113  | 0.39   | 1.147 | 4.02E-77   |
| LAMC1  | 0.317  | 0.22   | 0.154  | 0.476  | 1.129 | 4.14E-33   |
| LGALS9 | 0.146  | 0.208  | 0.164  | 0.546  | 2.621 | 1.03E-93   |
| FADS3  | -0.208 | 0.268  | 0.546  | 0.285  | 0.861 | 4.08E-29   |
| VWA5A  | -0.256 | -0.241 | 0.024  | 0.26   | 0.948 | 2.11E-23   |
| LOX    | 0.386  | 0.044  | -0.175 | -0.033 | 1.452 | 6.15E-120  |
| LOXL1  | 0.088  | 0.022  | 0.045  | 0.229  | 0.935 | 1.28E-19   |
| LOXL2  | 0.296  | 0.087  | -0.011 | 0.466  | 0.927 | 3.04E-17   |
| LPP    | 0.448  | 0.051  | 0.021  | 0.268  | 0.687 | 3.05E-19   |
| LRPAP1 | 0.163  | 0.241  | 0.122  | 0.489  | 0.736 | 2.32E-19   |
| LTB    | -0.335 | -0.08  | 0.314  | -0.081 | 4.73  | 1.65E-221  |
| LTF    | -0.264 | -0.692 | 0.203  | 0.506  | 1.675 | 2.35E-54   |
| SMAD1  | -0.095 | 0.06   | 0.252  | 0.553  | 1.985 | 1.34E-134  |
| MCAM   | 0.024  | 0.118  | 0.204  | 0.549  | 1.409 | 1.45E-88   |
| MEF2D  | 0.442  | 0.193  | 0.289  | 0.39   | 1.023 | 1.89E-29   |
| MET    | 0.285  | -0.06  | -0.208 | 0.175  | 0.799 | 6.78E-36   |
| MFAP2  | 0.123  | 0.059  | -0.018 | 0.312  | 1.671 | 1.56E-122  |
| MLLT3  | -0.137 | -0.415 | -0.104 | 0.306  | 0.942 | 1.45E-27   |
| MMP1   | 0.188  | 0.008  | -0.019 | 0.382  | 1.212 | 2.12E-56   |
| MMP10  | 0.42   | 0.171  | -0.061 | 0.226  | 0.935 | 6.15E-46   |
| MMP11  | -0.026 | -0.142 | -0.091 | -0.092 | 1.352 | 3.78E-24   |
| MMP15  | 0.168  | -0.217 | -0.107 | -0.059 | 1.242 | 2.65E-32   |
| MMP19  | -0.467 | 0.251  | 0.474  | 0.276  | 0.904 | 1.46E-38   |
| CD200  | -0.108 | -0.143 | -0.163 | 0.183  | 1.263 | 1.09E-15   |
| MRC1   | 0.188  | -0.048 | 0.146  | 0.507  | 0.987 | 1.34E-09   |
| MSRA   | 0.101  | 0.116  | 0.108  | 0.489  | 0.959 | 1.38E-23   |
| MXI1   | 0.35   | 0.288  | 0.366  | 0.263  | 0.891 | 0.00000172 |
| NFKBIE | 0.458  | 0.669  | 0.246  | 0.033  | 0.738 | 2.05E-23   |
| NPAS2  | -0.016 | -0.149 | 0.269  | 0.488  | 1.254 | 1.62E-55   |
| NRGN   | 0.013  | -0.011 | -0.019 | 0.192  | 1.132 | 1.03E-43   |
| NT5E   | 0.158  | 0.006  | 0.086  | 0.525  | 1.245 | 4.84E-83   |
| ROR1   | 0.448  | 0.121  | 0.182  | 0.339  | 0.89  | 1.9E-19    |
| GPR143 | 0.514  | 0.263  | 0.439  | 0.551  | 1.469 | 1.23E-09   |
| OAS1   | -0.157 | -0.386 | 0.231  | 0.482  | 0.979 | 6.66E-10   |
| PAK3   | -0.191 | 0.106  | 0.543  | 0.393  | 1.094 | 2.77E-09   |

|         |        |        |        |        |       |            |
|---------|--------|--------|--------|--------|-------|------------|
| PAM     | 0.315  | 0.204  | 0.1    | 0.458  | 0.867 | 3.01E-28   |
| PDE2A   | 0.297  | 0.034  | 0.369  | 0.489  | 1.312 | 2.56E-38   |
| PDK3    | 0.241  | 0.112  | -0.089 | 0.361  | 0.937 | 1.01E-08   |
| PECAM1  | 0.173  | -0.033 | -0.028 | 0.422  | 1.117 | 1.02E-76   |
| ATP8B1  | 0.028  | 0.087  | 0.388  | 0.571  | 1.539 | 1.54E-80   |
| PFKFB3  | 0.578  | 0.342  | 0.268  | 0.367  | 1.338 | 9.18E-102  |
| PHEX    | 0.036  | -0.209 | 0.041  | 0.335  | 1.335 | 1.59E-33   |
| PLOD2   | 0.051  | 0.145  | 0.131  | 0.387  | 1.01  | 2.39E-67   |
| PLS3    | 0.535  | 0.219  | 0.078  | 0.494  | 0.857 | 1.07E-14   |
| PLTP    | 0.366  | 0.239  | 0.083  | 0.454  | 0.999 | 5.88E-19   |
| PLXNB1  | 0.346  | 0.593  | 0.606  | 0.185  | 1.155 | 1.01E-37   |
| PPP2R3A | 0.228  | 0.221  | 0.241  | 0.293  | 1.361 | 1.2E-49    |
| PSMB8   | 0.078  | 0.171  | 0.13   | 0.436  | 0.928 | 3.61E-30   |
| QSOX1   | 0.141  | 0.004  | 0.017  | 0.372  | 1.101 | 1.04E-51   |
| PTPRE   | -0.112 | 0.004  | 0.378  | 0.315  | 0.876 | 5.61E-46   |
| PTPRF   | -0.01  | -0.035 | 0.161  | 0.444  | 1.002 | 1.97E-35   |
| PTPRM   | 0.035  | -0.061 | 0.003  | -0.068 | 1.037 | 1.34E-51   |
| PTPRS   | -0.116 | 0.256  | 0.124  | 0.078  | 0.894 | 8.31E-13   |
| RAC2    | 0.224  | -0.23  | -0.044 | 0.452  | 0.962 | 2.19E-34   |
| RALA    | 0.354  | -0.169 | -0.301 | -0.111 | 1.055 | 7.14E-150  |
| RASGRF2 | 0.033  | -0.176 | -0.357 | 0.04   | 0.742 | 2.94E-40   |
| SORT1   | 0.141  | 0.02   | 0.063  | 0.39   | 1.3   | 1.51E-34   |
| S100A3  | 0.353  | 0.281  | 0.159  | 0.233  | 1.241 | 0.0000111  |
| CCL2    | -0.31  | 1.245  | 0.886  | 0.285  | 2.573 | 8.58E-49   |
| CCL7    | -0.073 | 1.164  | 1.108  | 0.46   | 1.672 | 3.47E-11   |
| CCL20   | 0.252  | 0.765  | 0.002  | -0.28  | 1.062 | 0.00000875 |
| CXCL6   | -0.159 | 0.539  | 0.144  | -0.236 | 0.882 | 6.34E-30   |
| CX3CL1  | -0.005 | 1.347  | 1.105  | 0.319  | 4.73  | 1.02E-291  |
| SELPLG  | -0.263 | -0.388 | 0.409  | 0.007  | 1.041 | 3.53E-09   |
| SFRP1   | 0.265  | 0.104  | 0.026  | 0.42   | 1.077 | 2.4E-38    |
| ST6GAL1 | -0.1   | -0.004 | 0.228  | 0.395  | 1.104 | 3.02E-49   |
| FSCN1   | 0.299  | -0.065 | -0.138 | 0.295  | 0.947 | 8.12E-22   |
| SOD2    | 0.192  | 0.439  | 0.226  | 0.268  | 1.227 | 1.45E-51   |
| SOX12   | -0.165 | -0.431 | 0.108  | 0.41   | 1.062 | 3.84E-43   |
| SPOCK1  | 0.332  | 0.159  | -0.02  | 0.379  | 0.801 | 3.76E-21   |
| SPTBN2  | 0.289  | -0.066 | -0.067 | -0.212 | 0.928 | 8.8E-40    |
| SRC     | 0.19   | 0.317  | 0.218  | 0.434  | 0.894 | 2.26E-32   |
| SVIL    | 0.142  | 0.166  | 0.452  | 0.523  | 1.116 | 5.2E-124   |

|           |        |        |        |        |       |            |
|-----------|--------|--------|--------|--------|-------|------------|
| TAPBP     | 0.108  | 0.284  | 0.223  | 0.401  | 0.868 | 1E-33      |
| TIMP2     | 0.188  | 0.02   | 0.065  | 0.453  | 1.358 | 9.59E-60   |
| TLE4      | 0.549  | 0.668  | 0.468  | 0.558  | 0.988 | 4.12E-31   |
| GPR137B   | 0.278  | 0.366  | 0.236  | 0.348  | 0.805 | 2.18E-08   |
| CLDN5     | -0.447 | -0.406 | -0.143 | 0.22   | 1.07  | 9.64E-64   |
| TNFAIP1   | 0.195  | 0.381  | 0.304  | 0.468  | 0.963 | 4.43E-45   |
| TRAF1     | -0.272 | 1.614  | 1.3    | 0.337  | 2.844 | 1.1E-202   |
| TRAF3     | 0.167  | 0.429  | 0.202  | 0.116  | 0.686 | 2.38E-28   |
| TRAF5     | -0.223 | -0.132 | 0.339  | -0.058 | 1.319 | 2.5E-38    |
| UBA7      | -0.206 | 0.146  | 0.505  | 0.205  | 1.343 | 8.07E-45   |
| UBE2H     | 0.233  | 0.218  | 0.311  | 0.568  | 1.503 | 4.96E-113  |
| UGCG      | -0.467 | 0.386  | 0.518  | 0.288  | 1.175 | 1.06E-72   |
| UTRN      | 0.183  | 0.039  | 0.185  | 0.392  | 1.231 | 1.64E-67   |
| VIM       | 0.342  | 0.131  | 0.061  | 0.442  | 1.098 | 2.8E-31    |
| VLDLR     | 0.549  | 0.269  | -0.184 | 0.268  | 1.224 | 5.93E-21   |
| CLIP2     | -0.315 | 0.078  | 0.381  | 0.293  | 0.801 | 7.21E-38   |
| WNT9A     | -0.125 | 0.45   | 0.945  | 0.235  | 1.874 | 3.96E-28   |
| XG        | 0.054  | -0.17  | 0.114  | 0.189  | 1.068 | 0.00000012 |
| ZFAND5    | 0.532  | 0.318  | 0.173  | 0.139  | 0.893 | 3.16E-123  |
| DNALI1    | -0.074 | 0.106  | 0.153  | 0.088  | 0.858 | 0.000467   |
| LAPTM5    | 0.259  | 0.103  | 0.092  | 0.5    | 0.972 | 4.68E-39   |
| PXDN      | 0.305  | 0.186  | 0.124  | 0.512  | 1.358 | 1.51E-47   |
| NRIP1     | 0.547  | 0.468  | 0.507  | 0.491  | 1.679 | 7.18E-70   |
| CDC42BPA  | 0.243  | -0.022 | 0.246  | 0.512  | 0.99  | 2.33E-45   |
| SEMA7A    | 0.305  | 0.378  | -0.005 | -0.397 | 1.962 | 2.22E-49   |
| PRSS12    | 0.139  | 0.155  | 0.266  | 0.554  | 1.093 | 3.38E-32   |
| CNTNAP1   | -0.324 | 0.168  | 0.606  | 0.501  | 1.532 | 2.8E-72    |
| NIPSNAP1  | 0.267  | 0.02   | -0.09  | 0.307  | 1.008 | 2.07E-39   |
| EIF3F     | 0.069  | 0.195  | 0.225  | 0.348  | 0.965 | 6.42E-54   |
| ABCC3     | -0.056 | -0.073 | 0.346  | 0.19   | 0.827 | 9.03E-27   |
| ADAM19    | 0.123  | -0.165 | 0.126  | 0.406  | 1.891 | 2.17E-212  |
| RNMT      | 0.143  | 0.279  | 0.262  | 0.242  | 0.708 | 3.09E-29   |
| TNFSF10   | -0.457 | -0.028 | 0.174  | 0.223  | 2.081 | 5.95E-23   |
| TNFRSF6B  | -0.182 | 0.124  | 0.358  | 0.313  | 1.088 | 3.93E-11   |
| TNFRSF10B | 0.268  | 0.646  | 0.424  | 0.098  | 0.79  | 3.93E-47   |
| FGF16     | -0.12  | -0.09  | 0.293  | 0.444  | 2.89  | 7.73E-58   |
| IQGAP1    | 0.357  | 0.176  | 0.111  | 0.397  | 0.698 | 1.09E-10   |
| ASAP2     | 0.431  | 0.143  | 0.329  | 0.539  | 0.715 | 3.35E-37   |

|          |        |        |        |        |       |            |
|----------|--------|--------|--------|--------|-------|------------|
| ST3GAL5  | 0.317  | -0.282 | 0.102  | 0.475  | 1.286 | 2.41E-48   |
| SQSTM1   | 0.163  | 0.662  | 0.472  | 0.484  | 1.064 | 1.96E-45   |
| EIF2B2   | 0.388  | -0.03  | -0.023 | 0.386  | 0.934 | 1.21E-49   |
| CCNA1    | -0.14  | -0.322 | -0.009 | 0.526  | 0.932 | 1.35E-34   |
| RAB29    | -0.185 | -0.005 | 0.241  | 0.413  | 0.758 | 3.47E-42   |
| KALRN    | -0.187 | 0.035  | 0.494  | 0.52   | 1.866 | 1.71E-57   |
| PSTPIP1  | -0.114 | -0.412 | 0.221  | 0.185  | 0.906 | 1.19E-10   |
| SLC16A4  | 0.093  | 0.026  | -0.025 | 0.427  | 0.931 | 1.73E-19   |
| SYNGR3   | 0.157  | 0.229  | -0.135 | 0.032  | 1.051 | 1.41E-09   |
| DYRK1B   | -0.03  | 0.048  | 0.204  | 0.398  | 1.005 | 3.1E-41    |
| MAGI1    | 0.087  | 0.139  | -0.181 | -0.399 | 0.93  | 6.98E-45   |
| DLGAP1   | 0.156  | -0.211 | -0.335 | 0.308  | 0.798 | 1.92E-16   |
| DHRS3    | 0.279  | -0.049 | -0.07  | 0.182  | 1.121 | 6.7E-22    |
| NREP     | -0.151 | -0.184 | 0.131  | 0.269  | 1.014 | 3.3E-44    |
| TGFBRAP1 | -0.059 | 0.174  | 0.395  | 0.518  | 0.9   | 2.04E-34   |
| NMT2     | 0.158  | -0.019 | 0.005  | 0.325  | 0.959 | 1.13E-97   |
| LPXN     | 0.37   | 0.031  | -0.064 | 0.242  | 2.073 | 3.17E-214  |
| TJP2     | 0.534  | 0.038  | 0.151  | 0.542  | 1.003 | 5E-11      |
| CDYL     | 0.084  | -0.001 | 0.094  | 0.426  | 1.031 | 1.22E-44   |
| CHST2    | 0.223  | -0.286 | -0.089 | 0.359  | 1.297 | 2.33E-141  |
| MAP4K4   | 0.172  | 0.051  | 0.164  | 0.331  | 1.109 | 3.39E-163  |
| HOMER3   | -0.178 | -0.149 | -0.096 | 0.053  | 0.898 | 7.1E-85    |
| MAPK8IP1 | 0.246  | 0.24   | 0.189  | 0.495  | 1.03  | 0.00000327 |
| ADAMTS4  | -0.305 | -0.036 | 0.202  | 0.095  | 0.764 | 1.78E-34   |
| CREB5    | 0.057  | 0.277  | 0.297  | 0.52   | 1.584 | 1.15E-24   |
| SNCAIP   | -0.496 | -0.474 | -0.06  | -0.354 | 1.364 | 1.19E-28   |
| SH3PXD2A | -0.4   | -0.417 | 0.424  | 0.183  | 0.842 | 6.41E-26   |
| GCC2     | 0.332  | 0.519  | 0.474  | 0.474  | 0.754 | 5.25E-26   |
| DOCK4    | 0.513  | -0.032 | 0.456  | 0.526  | 1.115 | 6.51E-116  |
| LZTS3    | -0.263 | 0.557  | 0.785  | 0.535  | 1.064 | 2.37E-26   |
| MTSS1    | 0.021  | -0.143 | 0.488  | 0.484  | 1.801 | 9.09E-78   |
| SCRN1    | 0.161  | -0.02  | 0.113  | 0.518  | 0.956 | 1.55E-39   |
| RABGAP1L | 0.556  | 0.104  | 0.139  | 0.551  | 0.713 | 2.12E-12   |
| TANK     | -0.228 | 0.166  | 0.318  | 0.239  | 0.799 | 1.34E-26   |
| BCL2L11  | 0.161  | 0.661  | 0.383  | 0.283  | 2.781 | 7.08E-83   |
| SH2D3C   | -0.561 | -0.118 | 0.344  | 0.472  | 0.804 | 5.79E-50   |
| PTPRU    | 0.314  | 0.07   | -0.001 | 0.205  | 1.254 | 1.33E-49   |
| ATP9A    | 0.335  | 0.148  | 0.156  | 0.234  | 0.768 | 2.03E-20   |

|          |        |        |        |        |       |           |
|----------|--------|--------|--------|--------|-------|-----------|
| TOB1     | 0.566  | 0.519  | 0.303  | 0.448  | 0.939 | 1.59E-20  |
| WASF2    | 0.07   | 0.2    | 0.223  | 0.355  | 0.827 | 4.93E-33  |
| TLR6     | 0.014  | 0.028  | 0.067  | 0.272  | 1.045 | 2.09E-07  |
| SEMA3A   | 0.084  | 0.453  | 0.33   | 0.53   | 1.548 | 3.4E-34   |
| BTN3A3   | -0.099 | -0.045 | 0.426  | 0.438  | 1.147 | 2.18E-36  |
| BASP1    | 0.244  | -0.103 | -0.1   | 0.275  | 0.95  | 2.51E-69  |
| CAP2     | 0.303  | -0.035 | 0.087  | 0.474  | 0.804 | 9.79E-14  |
| VAT1     | 0.22   | 0.016  | 0.034  | 0.524  | 1.095 | 3.2E-30   |
| SEMA6B   | -0.319 | -0.226 | 0.096  | 0.541  | 1.058 | 6.4E-42   |
| DPYSL4   | 0.108  | 0.364  | 0.18   | 0.16   | 0.859 | 6.26E-07  |
| CDC42EP3 | -0.473 | 0.29   | 0.381  | 0.389  | 0.739 | 1.18E-52  |
| TRIM16   | -0.157 | -0.238 | 0.344  | 0.552  | 1.244 | 6.98E-73  |
| PDPN     | 0.125  | -0.125 | -0.175 | -0.062 | 1.16  | 2.31E-41  |
| KHDRBS1  | 0.337  | 0.134  | -0.003 | 0.511  | 0.727 | 3.01E-11  |
| GRAP     | 0.492  | -0.197 | -0.082 | 0.196  | 0.716 | 4.08E-30  |
| KDM5B    | 0.148  | 0.171  | 0.151  | 0.348  | 0.955 | 6.13E-40  |
| SDCCAG8  | -0.142 | 0.017  | 0.224  | 0.303  | 0.885 | 1.32E-29  |
| PNRC1    | 0.345  | 0.705  | 0.454  | 0.546  | 1.443 | 2.44E-49  |
| ACOT2    | 0.096  | 0.209  | 0.245  | 0.47   | 1.11  | 6.55E-16  |
| BTN3A1   | -0.133 | -0.027 | 0.468  | 0.413  | 1.023 | 4.37E-32  |
| CAPN11   | -0.022 | -0.194 | 0.59   | 0.249  | 1.021 | 3.79E-12  |
| ADAMTS7  | 0.108  | 0.434  | 0.565  | 0.478  | 1.518 | 6.72E-105 |
| AKAP2    | -0.247 | 0.151  | 0.31   | 0.254  | 1.103 | 2.14E-32  |
| RNF24    | 0.285  | 0.209  | 0.247  | 0.222  | 1.207 | 2.56E-86  |
| NID2     | 0.549  | 0.329  | 0.038  | 0.325  | 1.658 | 5.6E-47   |
| RASA3    | 0.365  | -0.243 | 0.124  | 0.542  | 0.752 | 6.54E-43  |
| PHLDA1   | -0.402 | 0.16   | 0.256  | 0.121  | 0.948 | 6.32E-57  |
| RNF44    | -0.034 | 0.128  | 0.348  | 0.355  | 0.947 | 4.5E-45   |
| DLGAP4   | 0.203  | 0.176  | 0.345  | 0.562  | 0.959 | 3.55E-24  |
| SEC31A   | 0.493  | 0.214  | 0.18   | 0.559  | 0.816 | 1.06E-10  |
| MLXIP    | 0.286  | 0.132  | 0.214  | 0.174  | 0.688 | 1.95E-25  |
| TRAK1    | 0.071  | 0.338  | 0.482  | 0.542  | 1.106 | 3.75E-108 |
| CD93     | 0.329  | -0.055 | -0.064 | 0.358  | 1.162 | 4.34E-66  |
| TMCC1    | 0.009  | 0.041  | 0.299  | 0.471  | 0.895 | 2.82E-25  |
| KDM4B    | -0.12  | 0.375  | 0.419  | 0.55   | 0.922 | 1.86E-39  |
| SAMD4A   | 0.501  | 0.792  | 0.856  | 0.254  | 0.952 | 2.4E-14   |
| PEG10    | 0.205  | -0.143 | -0.183 | 0.132  | 1.196 | 9.5E-42   |
| ARHGAP26 | 0.212  | -0.104 | 0.254  | 0.315  | 1.202 | 2.27E-47  |

|           |        |        |        |        |       |           |
|-----------|--------|--------|--------|--------|-------|-----------|
| TAB2      | 0.378  | 0.408  | 0.285  | 0.466  | 0.739 | 1.98E-23  |
| TBC1D9    | 0.115  | 0.053  | 0.165  | 0.509  | 1.24  | 1.26E-72  |
| LPIN1     | -0.093 | 0.117  | 0.277  | 0.393  | 1.217 | 2.51E-113 |
| RGL1      | 0.349  | 0.493  | 0.521  | 0.458  | 1.199 | 1.35E-25  |
| FBXL7     | -0.4   | -0.191 | -0.139 | -0.043 | 0.831 | 2.84E-47  |
| KIAA0922  | -0.094 | -0.103 | 0.008  | 0.157  | 0.842 | 1.43E-22  |
| ZC3H7B    | 0.04   | 0.144  | 0.199  | 0.335  | 0.898 | 1.66E-45  |
| IQCE      | 0.288  | -0.149 | 0.017  | 0.157  | 0.695 | 2.17E-24  |
| SMG6      | -0.002 | 0.26   | 0.254  | 0.466  | 1.089 | 2.53E-47  |
| GPR161    | 0.155  | 0.01   | -0.046 | 0.046  | 0.77  | 2.78E-34  |
| SEC14L2   | 0.289  | 0.403  | 0.448  | 0.545  | 0.791 | 3.28E-17  |
| RBFOX2    | 0.175  | -0.116 | 0.083  | 0.366  | 0.921 | 6.2E-121  |
| SSBP3     | 0.385  | -0.165 | -0.046 | 0.356  | 0.937 | 2.37E-51  |
| PLXNB2    | 0.536  | 0.99   | 0.963  | 0.561  | 0.882 | 1.51E-56  |
| FLRT2     | -0.037 | 0.087  | 0.064  | 0.028  | 1.017 | 8.75E-40  |
| PANX1     | 0.459  | 0.627  | 0.443  | 0.5    | 1.079 | 2.82E-30  |
| KIAA1549L | 0.081  | -0.4   | -0.101 | 0.29   | 0.778 | 8.1E-37   |
| PGLS      | 0.083  | 0.072  | 0.086  | 0.369  | 0.813 | 7.76E-26  |
| QPCT      | 0.263  | 0.104  | 0.035  | 0.325  | 1.094 | 6.51E-72  |
| BACE2     | 0.221  | 0.038  | 0.011  | 0.355  | 1.299 | 2.87E-104 |
| ABI3BP    | 0.219  | 0.102  | 0.09   | 0.363  | 0.841 | 2.46E-13  |
| TMEM158   | -0.113 | -0.334 | -0.387 | -0.091 | 2.609 | 6.93E-177 |
| SAMHD1    | 0.184  | 0.117  | 0.142  | 0.518  | 0.858 | 1.03E-16  |
| ADGRA2    | 0.06   | -0.12  | -0.154 | 0.031  | 0.941 | 2.63E-54  |
| C2CD2     | -0.364 | 0.098  | 0.473  | 0.18   | 0.891 | 1.21E-34  |
| SNED1     | 0.2    | 0.06   | 0.196  | 0.311  | 1.189 | 8.59E-50  |
| LRIG1     | -0.347 | 0.164  | 0.292  | 0.147  | 1.086 | 1.61E-34  |
| TMEM98    | 0.053  | 0.022  | 0.007  | 0.215  | 1.001 | 8.61E-131 |
| OSBPL3    | -0.219 | 0.512  | 0.773  | 0.575  | 1.157 | 1.61E-75  |
| WIPI2     | 0.21   | 0.209  | 0.198  | 0.428  | 0.726 | 1.19E-16  |
| PITPNC1   | 0.142  | -0.044 | -0.068 | 0.158  | 1.078 | 2.63E-20  |
| RGS17     | -0.448 | -0.141 | 0.339  | -0.051 | 1.074 | 1.38E-18  |
| MYEOV     | -0.52  | 0.083  | 0.268  | 0.144  | 0.874 | 1.17E-18  |
| HBP1      | 0.315  | 0.236  | 0.424  | 0.571  | 0.863 | 5.41E-38  |
| SDCBP2    | 0.136  | -0.047 | 0.167  | 0.403  | 1.239 | 2.67E-23  |
| DKK3      | 0.291  | 0.028  | -0.058 | 0.337  | 1.337 | 2.73E-84  |
| GPR162    | -0.423 | -0.128 | 0.369  | 0.256  | 0.837 | 1.16E-16  |
| TNFRSF21  | 0.384  | 0.236  | 0.274  | 0.495  | 1.893 | 3.4E-160  |



|          |        |        |        |        |       |           |
|----------|--------|--------|--------|--------|-------|-----------|
| RGCC     | 0.21   | -0.079 | 0.149  | -0.071 | 1.078 | 2.83E-35  |
| PYCARD   | 0      | -0.24  | -0.109 | 0.192  | 1.122 | 5.42E-29  |
| DSE      | 0.179  | 0.237  | 0.129  | 0.102  | 1.276 | 4.04E-39  |
| GLTSCR2  | 0.068  | 0.175  | 0.208  | 0.409  | 1.08  | 9.39E-89  |
| EHD4     | 0.338  | -0.156 | -0.082 | 0.356  | 0.687 | 1.2E-20   |
| NOX4     | 0.175  | 0.117  | 0.201  | 0.227  | 0.757 | 1.76E-28  |
| PODXL2   | -0.088 | 0.031  | -0.353 | -0.132 | 1.029 | 1.49E-08  |
| ASAP1    | 0.307  | 0.128  | 0.45   | 0.472  | 0.939 | 4.83E-71  |
| NTM      | 0.169  | 0.084  | 0.03   | 0.206  | 1.797 | 7.4E-97   |
| SHANK1   | -0.36  | -0.064 | 0.234  | 0.037  | 0.855 | 7.87E-26  |
| HDDC2    | 0.055  | 0.008  | 0.356  | 0.126  | 1.181 | 8.68E-12  |
| PLEKHO1  | 0.524  | -0.004 | -0.1   | 0.027  | 1.137 | 2.58E-85  |
| ZNF219   | -0.224 | 0.374  | 0.716  | 0.486  | 1.365 | 6.42E-19  |
| REEP2    | -0.022 | 0.25   | 0.261  | 0.415  | 1.14  | 2.54E-07  |
| AIG1     | -0.026 | 0.087  | 0.443  | 0.52   | 1.054 | 8.25E-31  |
| TRPV2    | -0.047 | -0.265 | -0.033 | 0.386  | 0.879 | 7.07E-13  |
| SNX9     | 0.343  | 0.156  | 0.171  | 0.357  | 0.932 | 1.03E-48  |
| RAB6B    | -0.088 | -0.355 | 0.158  | 0.193  | 0.926 | 7.32E-11  |
| DHRS7    | 0.14   | 0.013  | 0.068  | 0.243  | 1.238 | 1.45E-66  |
| ACSL5    | 0.102  | 0.007  | 0.153  | 0.39   | 0.939 | 4.38E-34  |
| GPRC5B   | -0.108 | 0.48   | 0.368  | 0.514  | 1.36  | 3.85E-47  |
| GALNT7   | 0.35   | 0.216  | 0.117  | 0.401  | 0.914 | 1.28E-33  |
| IL17D    | -0.038 | 0.052  | 0.069  | 0.136  | 0.879 | 3.78E-15  |
| ZFYVE1   | 0.525  | 0.536  | 0.394  | 0.428  | 0.958 | 1.04E-29  |
| SLC37A1  | 0.13   | 0.371  | 0.567  | 0.438  | 1.126 | 8.7E-13   |
| GSAP     | -0.403 | -0.2   | 0.679  | 0.402  | 1.388 | 1.91E-19  |
| SIAE     | 0.164  | 0.015  | 0.072  | 0.327  | 0.915 | 6.74E-43  |
| RIN2     | -0.001 | 0.388  | 0.499  | 0.438  | 0.976 | 2.85E-67  |
| RHOF     | 0.189  | -0.193 | 0.182  | 0.558  | 1.74  | 4.37E-117 |
| DDIT4    | -0.479 | -0.155 | 0.372  | 0.501  | 0.767 | 6.93E-51  |
| EGLN1    | 0.209  | 0.192  | 0.133  | 0.507  | 1.049 | 1.48E-60  |
| TMEM132A | -0.039 | 0.063  | 0.042  | 0.189  | 1.147 | 2.17E-108 |
| ZSCAN2   | 0.125  | 0.284  | 0.172  | 0.568  | 1.064 | 3.25E-17  |
| ENOX1    | 0.275  | -0.216 | -0.453 | -0.331 | 0.93  | 6.74E-32  |
| RALGPS2  | -0.023 | -0.234 | -0.248 | -0.034 | 0.905 | 1.59E-82  |
| KIAA1551 | -0.032 | 0.243  | 0.049  | -0.106 | 1.406 | 8.19E-147 |
| LRRC20   | -0.051 | -0.356 | -0.056 | 0.423  | 1.003 | 2.99E-22  |
| FGGY     | 0.364  | -0.03  | -0.063 | 0.491  | 0.783 | 2.84E-08  |

|          |        |        |        |        |       |            |
|----------|--------|--------|--------|--------|-------|------------|
| LARP6    | 0.434  | 0.112  | 0.085  | 0.151  | 0.729 | 1.62E-13   |
| TMEM63B  | -0.215 | 0.111  | 0.349  | 0.295  | 0.96  | 5.35E-72   |
| DDX43    | 0.313  | 0.019  | 0.414  | 0.22   | 0.993 | 0.00000304 |
| RBM38    | 0.335  | 0.36   | 0.354  | 0.428  | 0.928 | 3.28E-23   |
| DOCK10   | 0.169  | -0.059 | 0.209  | 0.214  | 1.118 | 2.09E-108  |
| TBC1D22B | 0.212  | 0.547  | 0.44   | 0.484  | 0.904 | 2.17E-31   |
| BCAS4    | -0.061 | 0.066  | 0.091  | 0.421  | 1.11  | 2.73E-08   |
| ARHGEF40 | 0.123  | 0.508  | 0.498  | 0.103  | 0.779 | 1.19E-12   |
| NECAP2   | 0.11   | 0.135  | 0.171  | 0.415  | 0.77  | 1.66E-28   |
| FAR2     | 0.325  | -0.064 | -0.103 | 0.334  | 1.364 | 2.59E-53   |
| PCDHGB7  | 0.2    | 0.28   | 0.024  | 0.534  | 1.588 | 2.78E-24   |
| PCDHGA4  | 0.427  | 0.376  | 0.062  | 0.478  | 1.436 | 2.72E-16   |
| GSDMC    | -0.129 | -0.234 | 0.263  | 0.317  | 0.885 | 3.62E-15   |
| KIAA1217 | -0.157 | 0.106  | 0.211  | 0.209  | 1.757 | 1.89E-33   |
| TCEAL7   | 0.168  | 0.077  | 0.121  | 0.162  | 0.948 | 0.0000787  |
| LXN      | -0.184 | -0.173 | -0.068 | -0.055 | 1.103 | 6.32E-41   |
| CEACAM19 | -0.353 | 0.227  | 0.85   | 0.09   | 0.919 | 3.17E-20   |
| RTN4     | 0.32   | 0.052  | -0.03  | 0.307  | 1.081 | 8.23E-71   |
| ERGIC1   | 0.188  | -0.108 | 0.077  | 0.416  | 1.245 | 5.24E-122  |
| TMCC3    | -0.115 | 0.009  | 0.286  | 0.41   | 1.335 | 5.22E-57   |
| GRAMD1B  | 0.098  | 0.139  | 0.393  | 0.138  | 1.067 | 4.27E-13   |
| NYNRIN   | 0.037  | -0.103 | 0.266  | 0.513  | 1.143 | 2.22E-72   |
| ALPK3    | 0.008  | -0.302 | -0.061 | 0.022  | 1.504 | 2.65E-172  |
| MARCH4   | 0.118  | -0.093 | 0.291  | 0.831  | 0.963 | 4.41E-38   |
| WDR48    | 0.19   | 0.491  | 0.451  | 0.542  | 0.89  | 1.76E-35   |
| KIAA1462 | -0.055 | -0.089 | 0.177  | 0.31   | 0.998 | 3.99E-72   |
| KIAA1522 | 0.018  | 0.172  | 0.387  | 0.291  | 1.097 | 3.03E-32   |
| KIAA1549 | -0.001 | 0.223  | 0.191  | 0.23   | 0.92  | 1.02E-40   |
| ZSWIM6   | 0.335  | 0.157  | 0.778  | 0.549  | 1.343 | 2.76E-39   |
| ZNF71    | 0.175  | 0.33   | 0.051  | 0.288  | 0.965 | 4.47E-28   |
| EXOC4    | 0.49   | 0.016  | -0.018 | 0.511  | 1.027 | 5.68E-25   |
| CCDC81   | -0.054 | 0.013  | 0.588  | 0.373  | 1.415 | 7.39E-11   |
| PERP     | 0.252  | 0.177  | 0.2    | 0.565  | 1.213 | 4.18E-71   |
| MCCC2    | 0.316  | 0.121  | 0.215  | 0.427  | 0.911 | 1.38E-17   |
| FN3K     | -0.253 | -0.288 | -0.078 | 0.352  | 0.929 | 3.16E-11   |
| ERAP2    | -0.089 | 0.415  | 0.889  | 0.322  | 1.076 | 1.2E-20    |
| SMURF2   | 0.464  | -0.067 | 0.166  | 0.121  | 0.963 | 2.18E-49   |
| PARP12   | 0.03   | -0.067 | 0.245  | 0.405  | 1.034 | 1.64E-42   |

|           |        |        |        |        |       |           |
|-----------|--------|--------|--------|--------|-------|-----------|
| FBXL17    | 0.288  | 0.022  | 0.203  | 0.442  | 0.916 | 1.09E-18  |
| FAM129B   | 0.17   | -0.088 | 0.123  | 0.515  | 1.03  | 3.87E-58  |
| PINK1     | -0.115 | -0.013 | 0.153  | 0.294  | 0.742 | 1.49E-50  |
| MARCKSL1  | 0.14   | -0.124 | -0.278 | 0.189  | 1.162 | 2.34E-88  |
| ZSWIM4    | 0.084  | 0.963  | 0.62   | 0.437  | 1.582 | 4.84E-92  |
| WNK4      | 0.031  | 0.064  | 0.551  | 0.494  | 1.331 | 1.14E-58  |
| ABHD8     | -0.323 | 0.208  | 0.182  | 0.567  | 0.929 | 8.03E-15  |
| CCNJL     | -0.431 | -0.053 | 0.181  | 0.552  | 1.086 | 2.72E-60  |
| ARHGAP10  | 0.114  | 0.323  | 0.191  | 0.478  | 0.988 | 2.48E-31  |
| PPP1R3B   | -0.003 | 0.089  | 0.214  | 0.439  | 0.87  | 2.87E-27  |
| SAP30L    | 0.08   | 0.138  | 0.095  | 0.235  | 0.914 | 5.53E-56  |
| VPS37B    | 0.558  | 0.264  | 0.336  | 0.553  | 0.893 | 4.6E-28   |
| DHRS12    | -0.029 | 0.084  | 0.054  | 0.031  | 0.941 | 9.79E-07  |
| RNF122    | 0.44   | 0.493  | 0.208  | 0.481  | 1.307 | 1.32E-25  |
| RIN3      | 0.294  | 0.224  | 0.214  | 0.464  | 1.107 | 1.35E-30  |
| PRR5L     | -0.335 | -0.382 | -0.205 | -0.385 | 0.888 | 9.06E-19  |
| KIAA0319L | -0.026 | 0.091  | 0.159  | 0.383  | 0.746 | 6.02E-48  |
| ERMP1     | 0.132  | 0.009  | 0.06   | 0.386  | 1     | 1.07E-38  |
| PCNX2     | 0.025  | 0.269  | 0.479  | 0.251  | 0.92  | 3.84E-26  |
| UBTD1     | -0.194 | -0.384 | -0.177 | 0.103  | 1.084 | 7.2E-65   |
| FBXL18    | -0.001 | 0.273  | 0.364  | 0.519  | 0.7   | 1.13E-09  |
| ZNF703    | 0.299  | -0.096 | 0.079  | 0.434  | 1.358 | 9.07E-74  |
| ARMC9     | -0.09  | -0.25  | 0.006  | 0.326  | 1.212 | 6.46E-39  |
| ACSF2     | -0.51  | -0.137 | 0.035  | 0.235  | 1.153 | 2.97E-28  |
| CD276     | 0.242  | 0.019  | -0.028 | 0.322  | 1.025 | 3.11E-42  |
| AKNA      | -0.232 | 0.041  | 0.203  | 0.23   | 0.797 | 1.77E-36  |
| SLC44A4   | 0.061  | 0.22   | 0.313  | 0.438  | 1.168 | 1.88E-16  |
| FAM49A    | 0.129  | 0.218  | 0.322  | 0.559  | 1.357 | 4.6E-87   |
| C1orf21   | 0.29   | 0.073  | -0.188 | 0.149  | 0.917 | 5.15E-21  |
| TRIM8     | 0.338  | 0.084  | 0.236  | 0.55   | 0.968 | 7.67E-40  |
| TMEM163   | 0.161  | -0.244 | 0.024  | 0.198  | 1.082 | 8.95E-18  |
| MAP1LC3B  | 0.264  | 0.194  | 0.224  | 0.437  | 1.018 | 2.04E-100 |
| DOCK8     | 0.472  | 0.51   | 0.45   | 0.558  | 1.419 | 1.82E-11  |
| RAB33B    | 0.246  | 0.295  | 0.571  | 0.517  | 1.06  | 7.21E-57  |
| SOX7      | 0.015  | 0.482  | 0.322  | 0.495  | 1.643 | 4.76E-118 |
| YPEL3     | -0.11  | 0.317  | 0.373  | 0.135  | 0.899 | 5.03E-17  |
| EVA1A     | -0.47  | -0.329 | 0.11   | 0.462  | 0.956 | 8.16E-46  |
| NLRC5     | 0.072  | 0.043  | 0.322  | 0.14   | 0.833 | 4.88E-19  |

|          |        |        |        |        |       |           |
|----------|--------|--------|--------|--------|-------|-----------|
| ANTXR1   | 0.09   | -0.036 | -0.121 | 0.217  | 1.25  | 1.14E-105 |
| MEX3B    | 0.362  | 0.14   | 0      | 0.334  | 2.127 | 1.57E-51  |
| SGIP1    | -0.089 | 0.243  | 0.643  | 0.337  | 2.55  | 2.53E-80  |
| SLC9A7   | -0.089 | -0.139 | 0.319  | 0.503  | 1.439 | 3.31E-56  |
| FAM167B  | -0.273 | -0.424 | 0.472  | 0.337  | 1.785 | 2.97E-28  |
| ADTRP    | 0.117  | -0.138 | 0.346  | 0.313  | 1.375 | 8.83E-43  |
| PARP10   | -0.464 | 0.406  | 0.833  | 0.528  | 1.018 | 3.49E-40  |
| FRMD5    | -0.344 | 0.029  | 0.249  | 0.405  | 1.079 | 5.45E-44  |
| MYLK2    | -0.044 | -0.404 | 0.19   | 0.522  | 1.666 | 1.67E-27  |
| MICALL1  | 0.256  | 0.137  | 0.128  | 0.426  | 0.678 | 5.83E-12  |
| KIAA1671 | 0.132  | 0.269  | 0.408  | 0.524  | 0.8   | 7.32E-19  |
| KLHL6    | 0.408  | -0.056 | 0.177  | 0.442  | 1.119 | 1.92E-20  |
| PHLDB2   | -0.267 | 0.03   | 0.289  | 0.339  | 1.172 | 3.48E-115 |
| TSPAN18  | 0.209  | -0.289 | -0.172 | 0.31   | 1.56  | 1.64E-95  |
| BMF      | 0.498  | 0.602  | 0.679  | 0.186  | 2.142 | 8.36E-51  |
| STARD13  | -0.085 | 0.055  | 0.342  | 0.281  | 0.789 | 2.19E-65  |
| SPOCD1   | -0.213 | -0.14  | 0.222  | 0.047  | 0.814 | 4.08E-33  |
| CCDC149  | 0.259  | 0.062  | 0.181  | 0.384  | 0.985 | 9.08E-14  |
| TRIM47   | 0.415  | 0.508  | 0.322  | 0.324  | 0.901 | 1.2E-17   |
| TPGS1    | 0.058  | 0.261  | 0.142  | 0.46   | 1.2   | 7.79E-15  |
| MEX3A    | 0.034  | -0.039 | -0.123 | 0.082  | 0.948 | 5.9E-29   |
| ADAMTSL1 | -0.185 | -0.262 | -0.365 | -0.339 | 0.733 | 6E-42     |
| PEX11G   | -0.268 | 0.072  | 0.282  | 0.346  | 0.87  | 0.000237  |
| HTRA3    | 0.383  | 0.151  | -0.038 | 0.121  | 1.054 | 4.28E-12  |
| SYTL3    | 0.572  | -0.174 | 0.328  | 0.409  | 1.059 | 1.54E-09  |
| CMTM7    | 0.198  | -0.246 | 0.108  | 0.319  | 0.893 | 8.3E-60   |
| AHNAK2   | -0.195 | -0.216 | 0.52   | 0.31   | 0.673 | 4.99E-23  |
| GLCCI1   | 0.052  | 0.39   | 0.235  | 0.232  | 0.891 | 1.45E-10  |
| PIK3IP1  | 0.104  | -0.252 | 0.055  | 0.247  | 2.488 | 1.08E-80  |
| EFHC1    | -0.527 | -0.087 | 0.485  | -0.037 | 0.835 | 1E-21     |
| FMNL2    | -0.129 | -0.029 | 0.554  | 0.346  | 1.16  | 3.48E-52  |
| TMEM200A | 0.357  | 0.131  | -0.28  | 0.032  | 1.126 | 4.02E-51  |
| PWWP2A   | 0.093  | 0.116  | 0.109  | 0.327  | 0.728 | 3.96E-23  |
| C1QTNF1  | 0.223  | -0.201 | -0.212 | 0.24   | 1.377 | 1.28E-45  |
| ZNF618   | 0.114  | -0.319 | 0.018  | 0.319  | 0.883 | 3.79E-58  |
| RAB42    | 0.058  | -0.354 | -0.41  | -0.208 | 1.026 | 1.27E-10  |
| GPR146   | 0.047  | -0.35  | 0.008  | 0.171  | 1.13  | 1.52E-11  |
| LYPD1    | 0.107  | -0.335 | -0.249 | 0.111  | 0.701 | 6.61E-28  |

|           |        |        |        |        |       |            |
|-----------|--------|--------|--------|--------|-------|------------|
| TWIST2    | 0.002  | -0.308 | -0.21  | 0.097  | 0.991 | 1.32E-19   |
| PARD3B    | -0.142 | -0.177 | 0.229  | 0.306  | 0.952 | 3.02E-49   |
| ANTXR2    | 0.274  | -0.188 | -0.218 | 0.104  | 0.944 | 1.31E-92   |
| DCUN1D3   | 0.22   | 0.412  | 0.309  | 0.23   | 0.874 | 1.66E-34   |
| IQCK      | 0.007  | 0.268  | 0.495  | 0.387  | 1.287 | 1.3E-21    |
| ZG16B     | -0.129 | 0.399  | 0.402  | 0.359  | 0.934 | 0.00497    |
| MSI2      | 0.337  | 0.046  | 0.298  | 0.512  | 0.996 | 2.55E-87   |
| TTC39C    | 0.477  | 0.608  | 0.612  | 0.409  | 0.905 | 0.00000156 |
| TRAPPC5   | -0.36  | -0.055 | -0.062 | -0.215 | 0.962 | 9.78E-11   |
| IFFO2     | 0.486  | -0.062 | 0.265  | 0.562  | 0.904 | 5.98E-41   |
| FBLN7     | 0.331  | 0.297  | 0.139  | 0.554  | 1.103 | 1.44E-07   |
| OCIAD2    | 0.1    | -0.18  | -0.274 | -0.271 | 1.085 | 3.87E-113  |
| CD109     | 0.278  | 0.044  | -0.087 | 0.176  | 0.703 | 7.11E-16   |
| UBXN2B    | -0.338 | 0.02   | 0.233  | 0.379  | 0.771 | 1.95E-21   |
| SLITRK4   | -0.183 | 0.006  | 0.029  | 0.066  | 0.749 | 2.78E-23   |
| ASB9      | 0.052  | -0.173 | -0.111 | 0.176  | 1.475 | 3.99E-39   |
| ZNF358    | -0.106 | 0.024  | 0.003  | 0.221  | 0.892 | 6.4E-34    |
| SIRPA     | 0.312  | 0.017  | -0.076 | 0.243  | 1.271 | 9.26E-88   |
| CFAP54    | -0.074 | 0.144  | 0.443  | 0.275  | 0.997 | 7.16E-17   |
| C2CD4A    | #N/A   | #N/A   | #N/A   | #N/A   | #N/A  | #N/A       |
| CCBE1     | 0.256  | -0.075 | 0.149  | 0.532  | 1.33  | 2.11E-82   |
| FAM117B   | #N/A   | #N/A   | #N/A   | #N/A   | #N/A  | #N/A       |
| GLIPR2    | 0.279  | 0.13   | 0.022  | 0.077  | 0.705 | 1.43E-21   |
| NEK10     | -0.215 | 0.309  | 1.004  | 0.306  | 1.473 | 6.14E-15   |
| SH3D19    | -0.157 | -0.09  | -0.018 | 0.161  | 0.699 | 1.56E-83   |
| CCDC112   | 0.056  | 0.045  | 0.179  | 0.422  | 0.976 | 8.16E-23   |
| SH3RF2    | -0.073 | -0.595 | -0.431 | 0.17   | 1.509 | 4.63E-43   |
| SLFN5     | 0.438  | 0.627  | 0.46   | 0.558  | 1.117 | 5.13E-42   |
| CITED4    | -0.441 | -0.019 | 0.082  | 0.381  | 2.006 | 3.26E-76   |
| APCDD1L   | 0.363  | -0.027 | -0.248 | 0.193  | 0.916 | 5.81E-32   |
| HMGA1P2   | 0.231  | 0.098  | 0.171  | 0.529  | 1.018 | 1.98E-19   |
| TMEM154   | 0.3    | -0.229 | -0.202 | 0.074  | 1.685 | 8.72E-60   |
| NRK       | 0.122  | -0.07  | 0.074  | 0.364  | 0.696 | 6.78E-16   |
| SAMD9L    | -0.235 | 0.187  | 0.544  | 0.467  | 1.076 | 1.06E-67   |
| OTUD1     | 0.207  | 0.299  | -0.136 | 0.132  | 0.797 | 0.00000343 |
| OAF       | 0.188  | -0.079 | -0.109 | 0.231  | 0.931 | 2.1E-50    |
| ADGRF5    | 0.018  | 0.04   | -0.008 | 0.298  | 1.765 | 6.44E-47   |
| KIAA1324L | 0.099  | 0.182  | 0.198  | 0.509  | 0.953 | 4.38E-48   |

|           |        |        |        |        |       |            |
|-----------|--------|--------|--------|--------|-------|------------|
| FNDC5     | 0.135  | 0.167  | 0.266  | 0.241  | 3.437 | 1.85E-64   |
| IPMK      | 0.504  | 0.704  | 0.522  | 0.506  | 1.434 | 9.59E-86   |
| TCP11L2   | -0.072 | 0.405  | 0.45   | 0.194  | 0.929 | 0.00000036 |
| NATD1     | -0.019 | 0.172  | -0.083 | 0.088  | 0.805 | 1.87E-17   |
| KANK3     | 0.032  | 0.28   | 0.628  | 0.315  | 1.169 | 1.06E-28   |
| BCL9L     | 0.22   | -0.204 | 0.229  | 0.47   | 0.817 | 4.64E-31   |
| P4HA3     | 0.192  | 0.068  | 0.028  | 0.248  | 0.876 | 6.07E-17   |
| CD163L1   | 0.077  | -0.104 | 0.134  | 0.241  | 0.96  | 1.89E-42   |
| KSR2      | -0.12  | -0.429 | 0.466  | 0.455  | 1.32  | 3.17E-101  |
| SLC46A3   | 0.188  | 0.162  | 0.094  | 0.454  | 1.08  | 2.18E-07   |
| SH3PXD2B  | 0.019  | -0.425 | -0.166 | 0.039  | 0.677 | 5.18E-29   |
| RGMB      | -0.363 | -0.128 | 0.069  | 0.185  | 1.313 | 1.29E-147  |
| ANO9      | #N/A   | #N/A   | #N/A   | #N/A   | #N/A  | #N/A       |
| ACER2     | 0.526  | 1.143  | 0.89   | 0.476  | 1.048 | 8.41E-30   |
| GALNT18   | 0.115  | 0.051  | 0.182  | 0.331  | 0.962 | 1.43E-10   |
| FAM89A    | 0.016  | -0.059 | 0.168  | 0.034  | 1.396 | 9.62E-34   |
| MAST4     | 0.197  | 0.482  | 0.53   | 0.432  | 1.169 | 1.97E-70   |
| AGRN      | 0.041  | 0.265  | 0.372  | 0.447  | 1.275 | 6.28E-60   |
| RAB15     | -0.012 | 0.105  | 0.099  | -0.139 | 0.81  | 1.27E-69   |
| GPR153    | -0.303 | -0.061 | 0.046  | -0.111 | 0.732 | 2.88E-15   |
| GVINP1    | -0.311 | -0.054 | 0      | -0.137 | 1.114 | 4.71E-18   |
| TMEM233   | 0.187  | -0.365 | 0.084  | 0.355  | 1.226 | 8.38E-38   |
| YPEL2     | -0.29  | 0.484  | 0.069  | 0.117  | 0.939 | 6.97E-53   |
| MEX3D     | 0.257  | 0.07   | -0.317 | 0.028  | 0.957 | 7.16E-46   |
| SH2D5     | -0.533 | 0.085  | 0.616  | 0.551  | 0.815 | 5.14E-16   |
| CTXN1     | -0.253 | -0.156 | -0.074 | 0.138  | 1.696 | 3.39E-48   |
| C16orf74  | -0.152 | -0.299 | 0.043  | 0.199  | 0.887 | 6.6E-43    |
| DENND6B   | -0.253 | 0.025  | 0.249  | -0.263 | 1.624 | 2.37E-33   |
| FKBP1C    | 0.238  | -0.082 | -0.103 | 0.159  | 0.681 | 1.24E-33   |
| NFE2L3P1  | 0.091  | -0.003 | 0.309  | 0.543  | 1.055 | 0.0000126  |
| FAM229A   | 0.204  | 0.03   | 0.35   | -0.32  | 0.863 | 0.00171    |
| RN7SL689P | #N/A   | #N/A   | #N/A   | #N/A   | #N/A  | #N/A       |
| ABL1      | 0.452  | -0.128 | 0.075  | 0.424  | 0.59  | 1.79E-18   |
| ACTN4     | 0.275  | 0.092  | 0.018  | 0.416  | 0.655 | 0.00000275 |
| AK1       | 0.18   | 0.128  | 0.269  | 0.569  | 0.859 | 4.14E-22   |
| AK4       | 0.444  | 0.118  | 0.108  | 0.33   | 0.672 | 1.11E-11   |
| ALDH2     | 0.196  | 0.12   | 0.003  | 0.41   | 0.772 | 1.57E-21   |
| BIN1      | 0.177  | -0.158 | -0.006 | 0.347  | 0.774 | 3.52E-40   |

|         |        |        |        |        |        |          |
|---------|--------|--------|--------|--------|--------|----------|
| SLC25A4 | 0.145  | 0.243  | 0.124  | 0.502  | 0.644  | 8.7E-13  |
| ANXA2   | 0.328  | 0.096  | 0.037  | 0.534  | 0.649  | 5.91E-11 |
| ANXA2P2 | 0.348  | 0.056  | 0.038  | 0.558  | 0.672  | 4.92E-12 |
| ANXA2P3 | 0.323  | -0.157 | -0.26  | 0.38   | 0.588  | 6.56E-08 |
| ANXA6   | 0.397  | 0.048  | -0.02  | 0.455  | 0.773  | 7.47E-11 |
| APAF1   | 0.385  | 0.292  | 0.25   | 0.253  | 0.704  | 2.9E-41  |
| APBA2   | 0.265  | -0.06  | 0.038  | 0.234  | 0.806  | 3.43E-25 |
| APBB1   | 0.126  | 0.106  | 0.214  | 0.454  | 0.717  | 9.67E-17 |
| APLP2   | 0.354  | 0.165  | 0.053  | 0.478  | 0.846  | 1.01E-19 |
| APP     | 0.343  | 0.124  | -0.006 | 0.451  | 0.804  | 4.68E-15 |
| RHOC    | 0.063  | 0.032  | 0.057  | 0.293  | 0.647  | 3.63E-34 |
| ARHGDI3 | 0.152  | -0.19  | -0.167 | -0.524 | -1.031 | 5.97E-08 |
| ATP6AP1 | 0.138  | 0.03   | -0.051 | 0.342  | 0.61   | 3.57E-16 |
| ATRX    | 0.033  | 0.123  | 0.182  | 0.111  | 0.632  | 3.55E-33 |
| BARD1   | 0.126  | -0.195 | -0.416 | -0.46  | -1.042 | 3.95E-52 |
| BCKDHB  | -0.138 | 0.004  | 0.124  | 0.377  | 0.599  | 3.91E-17 |
| BCL7A   | 0.526  | 0.033  | 0.099  | 0.259  | 0.632  | 5.33E-11 |
| BCS1L   | -0.31  | -0.075 | -0.02  | -0.453 | -0.997 | 5.46E-37 |
| BDNF    | -0.059 | 0.212  | -0.424 | -0.182 | -1.452 | 1.24E-51 |
| BFSP1   | -0.041 | -0.313 | 0.002  | -0.002 | 0.614  | 0.000139 |
| BSG     | 0.194  | 0.036  | -0.056 | 0.388  | 0.622  | 9.9E-13  |
| BST2    | -0.116 | -0.166 | -0.036 | 0.178  | 0.692  | 2.11E-52 |
| BTD     | 0.183  | 0.126  | 0.1    | 0.389  | 0.637  | 5.74E-13 |
| DAGLA   | -0.335 | 0.214  | 0.361  | 0.304  | 0.589  | 1.8E-17  |
| CAPN1   | 0.285  | 0.104  | 0.101  | 0.519  | 0.709  | 7.59E-09 |
| CAST    | 0.347  | 0.224  | 0.2    | 0.517  | 0.71   | 5.39E-16 |
| CASP6   | 0.081  | -0.071 | -0.07  | 0.248  | 0.687  | 7.84E-21 |
| CAT     | 0.133  | -0.078 | -0.146 | 0.382  | 0.651  | 6.98E-20 |
| RUNX1   | -0.042 | -0.137 | 0.082  | 0.174  | 0.686  | 1.87E-42 |
| CD47    | -0.264 | -0.037 | 0.17   | 0.201  | 0.642  | 4.48E-21 |
| CDH4    | -0.01  | -0.122 | -0.165 | 0.168  | 0.718  | 2.22E-11 |
| CDK6    | 0.442  | 0.3    | 0.078  | -0.058 | 0.605  | 5.86E-38 |
| CDKN2A  | -0.111 | -0.098 | -0.141 | -0.044 | 0.675  | 1.1E-09  |
| CDKN2C  | -0.494 | -0.742 | -0.661 | -0.237 | -1.402 | 2.99E-46 |
| CDKN2D  | -0.131 | -0.501 | -0.056 | 0.151  | -1.294 | 5.42E-22 |
| CHN1    | 0.14   | -0.101 | -0.039 | 0.003  | 0.815  | 2.92E-20 |
| CLCN4   | 0.168  | -0.231 | -0.382 | -0.091 | -1.42  | 8.06E-92 |
| CLCN5   | -0.017 | 0.046  | -0.253 | -0.396 | -1.017 | 1.18E-32 |

|         |        |        |        |        |        |           |
|---------|--------|--------|--------|--------|--------|-----------|
| CLU     | 0.282  | 0.048  | -0.088 | 0.378  | 0.711  | 3.36E-14  |
| COL8A1  | 0.283  | 0.009  | -0.186 | 0.216  | 0.673  | 1.81E-14  |
| CPD     | 0.256  | 0.218  | 0.06   | 0.39   | 0.63   | 3.03E-09  |
| CRIP1   | -0.062 | -0.175 | -0.216 | -0.32  | -1.095 | 1.8E-15   |
| CRP     | -0.527 | -0.526 | -0.481 | -0.341 | -1.002 | 0.0187    |
| HAPLN1  | -0.023 | -0.107 | -0.429 | -0.198 | -1.23  | 2.52E-28  |
| CRYAB   | 0.306  | -0.092 | -0.288 | -0.169 | -2.12  | 1.96E-52  |
| CST3    | 0.103  | -0.058 | -0.056 | 0.255  | 0.728  | 5.7E-40   |
| CTGF    | 0.08   | 0.015  | -0.302 | -0.351 | -0.983 | 6.56E-58  |
| CTNNA1  | 0.482  | 0.208  | 0.078  | 0.499  | 0.679  | 4.83E-07  |
| CTSD    | 0.224  | 0.175  | 0.059  | 0.539  | 0.634  | 7.33E-07  |
| CTSZ    | 0.222  | 0.065  | 0.014  | 0.463  | 0.755  | 2.95E-20  |
| DAP     | 0.149  | -0.011 | -0.002 | 0.307  | 0.852  | 1.73E-67  |
| DBN1    | 0.031  | -0.173 | -0.069 | 0.178  | 0.76   | 3.11E-50  |
| DMD     | 0.066  | 0.016  | 0.188  | 0.235  | -1.128 | 7.01E-50  |
| DNA2    | -0.079 | 0.118  | -0.191 | -0.358 | -1.222 | 6.22E-46  |
| DOCK1   | 0.35   | 0.115  | 0.116  | 0.444  | 0.83   | 4.56E-33  |
| DPP4    | 0.4    | -0.011 | -0.063 | 0.295  | 0.749  | 1.03E-08  |
| DTNA    | -0.049 | 0.2    | 0.408  | 0.246  | 0.789  | 0.0000492 |
| ECM1    | 0.043  | 0.149  | 0.161  | 0.2    | 0.651  | 4.83E-08  |
| EIF4B   | 0.253  | 0.185  | 0.248  | 0.516  | 0.74   | 4.29E-44  |
| EPB41L1 | 0.192  | -0.15  | -0.028 | 0.437  | 0.776  | 1.4E-18   |
| EPOR    | -0.313 | -0.217 | 0.102  | 0.318  | 0.596  | 1.11E-15  |
| NR2F6   | -0.239 | -0.415 | -0.109 | 0.18   | 0.585  | 1.95E-17  |
| ETV4    | -0.376 | -0.225 | 0.041  | 0.236  | 0.642  | 1.81E-38  |
| FANCE   | -0.069 | -0.247 | -0.371 | -0.569 | -1.044 | 2.09E-27  |
| ACSL1   | 0.408  | 0.172  | 0.115  | 0.253  | 0.628  | 2.27E-13  |
| ACSL3   | 0.189  | -0.192 | -0.257 | 0.047  | 0.664  | 6.02E-40  |
| ACSL4   | 0.462  | 0.169  | 0.143  | 0.532  | 0.775  | 2.9E-16   |
| FBN2    | 0.207  | 0.087  | 0.02   | 0.272  | 0.759  | 2.84E-11  |
| FEN1    | 0.472  | 0.167  | -0.181 | -0.136 | -0.956 | 1.46E-55  |
| FGFR1   | 0.059  | -0.094 | -0.128 | 0.015  | 0.787  | 2.61E-61  |
| FHL1    | 0.226  | -0.004 | -0.049 | 0.292  | 0.798  | 1.09E-29  |
| FHL3    | 0.098  | 0.038  | 0.171  | 0.268  | 0.725  | 2.49E-23  |
| FLOT2   | -0.101 | -0.114 | 0.106  | 0.519  | 0.818  | 1.18E-28  |
| FLT1    | 0.478  | -0.075 | -0.503 | -0.318 | -1.467 | 1.78E-55  |
| FUCA2   | 0.147  | 0.15   | 0.127  | 0.413  | 0.785  | 4.57E-38  |
| ACKR1   | 0.06   | 0.113  | 0.025  | -0.488 | -1.457 | 7.79E-42  |



|         |        |        |        |        |        |           |
|---------|--------|--------|--------|--------|--------|-----------|
| GAA     | 0.113  | 0.13   | 0.07   | 0.302  | 0.633  | 1.62E-11  |
| GALNS   | 0.177  | 0.071  | 0.069  | 0.411  | 0.634  | 6.37E-10  |
| GATA3   | -0.016 | -0.298 | -0.483 | -0.128 | -1.134 | 1.35E-17  |
| GCNT1   | -0.037 | -0.472 | -0.528 | -0.191 | -0.959 | 2.35E-33  |
| GLB1    | 0.25   | 0.097  | -0.02  | 0.466  | 0.705  | 4.66E-19  |
| GLDC    | -0.097 | -0.051 | 0.207  | 0.535  | 0.73   | 2.35E-09  |
| GLDCP1  | -0.098 | -0.073 | 0.183  | 0.479  | 0.827  | 0.000164  |
| GLS     | -0.044 | -0.021 | 0.104  | 0.202  | 0.655  | 1.73E-51  |
| GNS     | 0.232  | 0.077  | -0.033 | 0.352  | 0.653  | 2.74E-14  |
| GRN     | 0.249  | 0.083  | -0.027 | 0.442  | 0.807  | 5.36E-14  |
| GRINA   | 0.067  | 0.029  | -0.011 | 0.261  | 0.763  | 2.29E-23  |
| GSK3B   | 0.301  | 0.177  | 0.169  | 0.422  | 0.762  | 2.05E-16  |
| GSTM2   | -0.069 | 0.184  | 0.333  | -0.117 | 0.693  | 0.00195   |
| GTF2I   | -0.001 | -0.179 | -0.03  | 0.144  | 0.605  | 2.43E-16  |
| HADHA   | 0.325  | 0.201  | 0.148  | 0.542  | 0.753  | 9.32E-11  |
| HADHB   | 0.268  | 0.17   | 0.132  | 0.483  | 0.678  | 2.3E-19   |
| HDAC1   | 0.241  | -0.041 | -0.027 | 0.089  | 0.612  | 1.94E-39  |
| HELLS   | 0.074  | 0.357  | -0.262 | -0.368 | -0.982 | 2.54E-59  |
| HIF1A   | 0.219  | 0.084  | 0.114  | 0.442  | 0.776  | 7.15E-16  |
| HLA-A   | 0.24   | 0.136  | 0.034  | 0.398  | 0.799  | 1.65E-23  |
| HLA-B   | 0.251  | 0.328  | 0.166  | 0.524  | 0.662  | 4.9E-13   |
| HLA-H   | 0.351  | 0.295  | 0.113  | 0.34   | 0.621  | 0.0125    |
| HLA-J   | 0.317  | 0.154  | 0.304  | 0.565  | 0.826  | 0.00463   |
| HMOX2   | 0.302  | -0.145 | -0.1   | 0.361  | 0.658  | 2.05E-22  |
| HNRNPC  | 0.443  | 0.146  | -0.013 | 0.325  | 0.662  | 5.42E-21  |
| HOXB9   | -0.045 | 0.004  | -0.139 | -0.048 | 0.837  | 9.59E-10  |
| HSD17B2 | -0.284 | -0.296 | -0.018 | 0.389  | 0.725  | 2.14E-44  |
| HTR1B   | -0.507 | -0.147 | -0.553 | -0.526 | -2.017 | 1.45E-61  |
| ID3     | -0.221 | -0.391 | -0.401 | -0.179 | -1.209 | 6.46E-21  |
| IDS     | 0.256  | 0.085  | 0.061  | 0.084  | 0.842  | 3.71E-62  |
| IFNAR1  | -0.003 | 0.183  | 0.172  | 0.368  | 0.589  | 4.06E-32  |
| IFNGR2  | -0.015 | 0.106  | 0.05   | 0.087  | 0.667  | 3.56E-26  |
| IGF2R   | 0.159  | 0.163  | 0.135  | 0.482  | 0.664  | 4.43E-10  |
| IGFBP1  | -0.049 | -0.109 | -0.561 | -0.532 | -4.25  | 4.58E-182 |
| IGFBP3  | -0.076 | -0.008 | -0.263 | -0.119 | -3.927 | 1.71E-150 |
| IGFBP6  | 0.181  | 0.072  | 0.037  | 0.221  | 0.759  | 1.59E-10  |
| IGFBP7  | 0.219  | 0.076  | 0.001  | 0.32   | 0.735  | 3.06E-28  |
| IL4R    | 0.389  | 0.24   | 0.391  | 0.371  | 0.641  | 1.41E-29  |

|        |        |        |        |        |        |           |
|--------|--------|--------|--------|--------|--------|-----------|
| IL18   | -0.09  | 0.102  | -0.466 | -0.288 | -1.287 | 0.0000185 |
| ITGB5  | 0.263  | -0.011 | -0.07  | 0.368  | 0.627  | 8.76E-16  |
| ITPR3  | -0.115 | -0.192 | 0.305  | -0.011 | 0.712  | 1E-33     |
| JARID2 | 0.141  | -0.257 | 0.198  | 0.427  | 0.84   | 6.49E-35  |
| KCNK1  | 0.122  | 0.153  | 0.198  | 0.191  | 0.859  | 0.0000075 |
| KIF22  | -0.431 | -0.428 | -0.438 | -0.329 | -1     | 9.45E-38  |
| KRT15  | #N/A   | #N/A   | #N/A   | #N/A   | #N/A   | #N/A      |
| KRT19  | 0.397  | -0.285 | -0.313 | 0.225  | 0.607  | 1.85E-11  |
| LAMP1  | 0.291  | 0.128  | -0.003 | 0.448  | 0.708  | 1.94E-16  |
| LASP1  | 0.195  | -0.033 | 0.027  | 0.454  | 0.651  | 2.13E-12  |
| LIMK1  | 0.152  | -0.134 | -0.032 | 0.294  | 0.669  | 9.73E-20  |
| LTBP2  | 0.343  | 0.006  | -0.209 | 0.084  | 0.688  | 4.28E-13  |
| BCAM   | -0.016 | 0.213  | 0.262  | 0.34   | 0.817  | 5.88E-17  |
| MAN1A1 | 0.151  | 0.115  | 0.005  | 0.101  | 0.611  | 1.54E-11  |
| MAN2B1 | 0.095  | 0.232  | 0.139  | 0.273  | 0.627  | 1.73E-12  |
| MANBA  | -0.017 | -0.083 | -0.001 | 0.316  | 0.793  | 3.47E-11  |
| MAOA   | 0.196  | -0.101 | -0.418 | -0.229 | -2.023 | 1.37E-44  |
| MAP1A  | 0.034  | 0.291  | 0.223  | 0.334  | -1.013 | 9.54E-14  |
| MAP2   | 0.133  | 0.017  | -0.416 | -0.429 | -1.004 | 2.25E-14  |
| MAP4   | 0.078  | 0.041  | 0.075  | 0.097  | 0.588  | 2.71E-38  |
| MFGE8  | 0.176  | 0.123  | 0.069  | 0.294  | 0.665  | 2.87E-16  |
| MGAT5  | 0.148  | -0.187 | -0.037 | 0.384  | 0.662  | 3.27E-31  |
| MGP    | 0.029  | 0.004  | -0.088 | -0.144 | -1.331 | 6.27E-68  |
| MME    | 0.055  | 0.024  | 0.078  | 0.262  | 0.847  | 1.81E-31  |
| MMP2   | 0.347  | 0.075  | -0.067 | 0.378  | 0.715  | 2.2E-13   |
| MMP7   | 0.055  | -0.042 | -0.594 | -0.389 | -1.345 | 5.06E-07  |
| MPST   | -0.161 | -0.188 | -0.049 | 0.196  | 0.804  | 2.05E-55  |
| MYH9   | 0.492  | 0.125  | 0.061  | 0.316  | 0.72   | 2.95E-07  |
| MYH10  | 0.139  | -0.049 | -0.15  | 0.212  | 0.692  | 1.59E-10  |
| MYL4   | -0.003 | 0.115  | 0.55   | 0.027  | 0.825  | 0.0133    |
| MYO1D  | 0.414  | 0.12   | -0.223 | 0.106  | 0.833  | 2E-14     |
| MYO6   | 0.432  | 0.398  | 0.344  | 0.523  | 0.671  | 1.77E-07  |
| NFIX   | 0.102  | -0.223 | -0.014 | 0.436  | 0.798  | 9.13E-15  |
| NFKB2  | -0.042 | 1.151  | 0.724  | 0.124  | 0.806  | 4.5E-74   |
| NOTCH2 | 0.069  | 0.064  | 0.04   | 0.196  | 0.655  | 1.56E-15  |
| NPR1   | -0.123 | -0.069 | -0.271 | -0.252 | -2.008 | 7.77E-47  |
| DDR2   | -0.259 | -0.089 | 0.141  | 0.004  | 0.877  | 1.17E-15  |
| NUCB1  | 0.251  | 0.109  | 0.041  | 0.482  | 0.59   | 8.73E-09  |

|         |        |        |        |        |        |            |
|---------|--------|--------|--------|--------|--------|------------|
| CLDN11  | 0.059  | -0.04  | 0.268  | 0.48   | 0.834  | 2.34E-18   |
| PEBP1   | 0.162  | -0.005 | -0.007 | 0.328  | 0.781  | 4.3E-40    |
| PDCL    | 0.395  | 0.074  | 0.16   | 0.451  | 0.661  | 1.71E-16   |
| PCBD1   | -0.11  | -0.115 | 0.079  | 0.277  | 0.772  | 3.24E-43   |
| PCDHGC3 | 0.197  | 0.018  | -0.004 | 0.312  | 0.729  | 5.55E-13   |
| PCSK5   | 0.201  | 0.172  | -0.045 | 0.175  | 0.584  | 6.75E-10   |
| PFKP    | 0.351  | -0.024 | -0.142 | 0.247  | 0.59   | 1.59E-10   |
| PGD     | 0.397  | 0.19   | 0.077  | 0.526  | 0.757  | 8.28E-11   |
| PITPNA  | 0.334  | 0.004  | -0.106 | 0.196  | 0.673  | 1.21E-26   |
| PLAUR   | 0.124  | -0.07  | 0.018  | 0.291  | 0.634  | 4.98E-17   |
| PLOD1   | 0.217  | 0.029  | -0.084 | 0.381  | 0.673  | 1.22E-11   |
| PML     | -0.006 | 0.198  | 0.288  | 0.391  | 0.86   | 2.12E-29   |
| PRRX1   | -0.313 | -0.171 | 0.072  | 0.233  | 0.8    | 1.64E-07   |
| PPARA   | -0.36  | 0.142  | 0.311  | 0.31   | 0.844  | 2.44E-23   |
| PPP3CA  | 0.244  | -0.113 | -0.152 | 0.092  | 0.781  | 2.81E-18   |
| PRIM1   | 0.136  | 0.113  | -0.158 | -0.173 | -1.21  | 4.63E-37   |
| PRKAB1  | -0.011 | 0.218  | 0.477  | 0.387  | 0.828  | 2.81E-23   |
| PKIA    | 0.038  | 0      | 0.165  | 0.241  | 0.626  | 4.07E-17   |
| PRKCA   | 0.484  | 0.01   | 0.109  | 0.498  | 0.695  | 1.52E-20   |
| PRKX    | 0.036  | 0.421  | 0.445  | 0.414  | 0.862  | 1.14E-51   |
| PRNP    | 0.231  | -0.056 | -0.202 | 0.094  | 0.722  | 3.95E-52   |
| PROS1   | 0.359  | 0.296  | -0.116 | 0.407  | 0.59   | 0.000558   |
| PRRG1   | 0.132  | 0.229  | -0.032 | 0.036  | 0.86   | 6.58E-51   |
| HTRA1   | 0.344  | 0.055  | -0.093 | 0.315  | 0.654  | 1.59E-18   |
| PSAP    | 0.269  | 0.083  | -0.014 | 0.406  | 0.705  | 1.23E-17   |
| PSEN2   | 0.139  | 0.013  | 0.098  | 0.394  | 0.613  | 0.00000108 |
| PSMB10  | 0.199  | -0.004 | 0.106  | 0.265  | 0.675  | 8.24E-12   |
| PSME1   | 0.123  | 0.09   | 0.18   | 0.236  | 0.59   | 3.02E-21   |
| PTEN    | 0.157  | 0.241  | 0.099  | 0.303  | 0.6    | 6.8E-20    |
| PTGER1  | -0.342 | -0.301 | -0.412 | -0.252 | 0.729  | 0.00000328 |
| PTGFRN  | 0.403  | 0.121  | 0.13   | 0.417  | 0.837  | 4.11E-15   |
| PTK2    | 0.209  | -0.065 | 0.171  | 0.521  | 0.688  | 4.53E-45   |
| PTPN14  | 0.185  | 0.03   | 0.122  | 0.289  | 0.681  | 7.69E-23   |
| PTPRK   | 0.286  | 0.062  | 0.014  | 0.064  | 0.591  | 1.92E-11   |
| PTS     | -0.127 | -0.038 | -0.061 | -0.532 | -1.092 | 8.79E-27   |
| RAB5B   | 0.122  | 0.039  | 0.143  | 0.254  | 0.613  | 1.41E-21   |
| RALGDS  | -0.182 | 0.225  | 0.406  | 0.015  | 0.78   | 8.1E-12    |
| RARRES3 | 0.197  | -0.125 | 0.083  | -0.074 | 0.777  | 0.00453    |

|          |        |        |        |        |        |           |
|----------|--------|--------|--------|--------|--------|-----------|
| RBBP8    | 0.346  | 0.337  | 0.023  | -0.097 | -1.094 | 8.99E-74  |
| RCN1     | 0.222  | 0.256  | 0.216  | 0.533  | 0.858  | 1.07E-44  |
| RFX3     | -0.473 | 0.116  | 0.334  | 0.285  | 0.745  | 3.18E-15  |
| RGS3     | -0.308 | -0.04  | -0.065 | -0.027 | 0.762  | 6.86E-40  |
| RNPEP    | 0.214  | 0.075  | 0.058  | 0.382  | 0.681  | 1.43E-12  |
| RPGR     | 0.196  | -0.009 | -0.227 | -0.473 | -1.627 | 5.56E-117 |
| RPS6KA3  | 0.206  | -0.079 | -0.017 | 0.225  | 0.699  | 4.58E-46  |
| RRBP1    | 0.349  | 0.069  | 0.052  | 0.307  | 0.694  | 2.55E-16  |
| SDC4     | 0.537  | 0.487  | 0.064  | -0.038 | 0.641  | 4.32E-32  |
| SGCG     | 0.169  | 0.13   | -0.553 | -0.355 | -2.599 | 7.57E-39  |
| SH3BGRL  | 0.153  | 0.003  | 0.067  | 0.206  | 0.641  | 1.28E-32  |
| SLC3A2   | 0.141  | 0.018  | -0.143 | -0.194 | -1.137 | 1.28E-65  |
| SLC8A1   | 0.049  | -0.317 | 0.046  | 0.146  | 0.698  | 7.75E-10  |
| SLC12A2  | -0.039 | 0.159  | -0.077 | -0.244 | 0.727  | 2.04E-49  |
| SMARCC1  | 0.411  | 0.126  | -0.05  | 0.282  | 0.66   | 1.93E-11  |
| SPR      | 0.067  | 0.016  | 0.125  | 0.415  | 0.634  | 5.96E-13  |
| ST13     | 0.291  | 0.151  | 0.106  | 0.49   | 0.711  | 4.9E-29   |
| STAT1    | 0.085  | 0.001  | 0.087  | 0.517  | 0.725  | 5.44E-17  |
| SULT1E1  | -0.53  | -0.295 | -0.105 | -0.29  | -1.54  | 1.54E-07  |
| STK10    | 0.193  | 0.112  | 0.178  | 0.367  | 0.616  | 1.31E-08  |
| ADAM17   | 0.212  | 0.197  | 0.179  | 0.317  | 0.63   | 2.3E-33   |
| TBL1X    | 0.155  | -0.189 | -0.058 | 0.27   | 0.709  | 1.14E-21  |
| TCF19    | 0.259  | 0.103  | -0.02  | -0.157 | -1.266 | 1.09E-122 |
| TCN2     | 0.204  | 0.018  | 0.066  | 0.525  | 0.687  | 4.58E-15  |
| PRDX2    | 0.211  | 0.078  | 0.035  | 0.439  | 0.752  | 1.82E-25  |
| TFDP2    | 0.182  | 0.011  | -0.198 | 0.043  | 0.655  | 8.41E-24  |
| TGFBR2   | -0.134 | -0.081 | 0.064  | 0.292  | 0.815  | 2.14E-46  |
| TJP1     | 0.473  | 0.12   | 0.249  | 0.472  | 0.719  | 3.23E-21  |
| TSPAN8   | -0.146 | 0.128  | -0.101 | 0.065  | -1.36  | 5.89E-14  |
| TNFRSF1B | 0.105  | -0.373 | -0.357 | -0.217 | -1.109 | 1.11E-42  |
| TNS1     | 0.397  | -0.193 | -0.014 | 0.192  | 0.772  | 1.28E-42  |
| TOP2B    | 0.297  | 0.14   | 0.116  | 0.541  | 0.821  | 2.33E-15  |
| TP53     | 0.15   | 0.235  | 0.221  | 0.448  | 0.695  | 5.22E-13  |
| TSPYL1   | 0.245  | 0.111  | 0.021  | 0.48   | 0.607  | 2.55E-07  |
| PHLDA2   | 0.227  | -0.024 | -0.254 | -0.149 | 0.584  | 8.94E-16  |
| TST      | -0.053 | -0.034 | 0.078  | 0.401  | 0.679  | 3.53E-16  |
| TSTA3    | -0.105 | -0.01  | 0.066  | 0.021  | 0.779  | 7.93E-63  |
| UCK2     | 0.323  | -0.089 | 0      | 0.284  | 0.725  | 5.14E-38  |

|          |        |        |        |        |        |            |
|----------|--------|--------|--------|--------|--------|------------|
| VEGFB    | -0.02  | -0.037 | 0.165  | 0.19   | 0.677  | 1.34E-27   |
| WIPF1    | 0.15   | 0.163  | 0.18   | 0.41   | 0.643  | 9.38E-13   |
| YY1      | 0.337  | 0.024  | -0.047 | 0.219  | 0.585  | 4.39E-16   |
| ZNF134   | 0.384  | 0.259  | 0.218  | 0.335  | 0.597  | 2.2E-09    |
| TRIM25   | 0.067  | 0.016  | 0.044  | 0.321  | 0.584  | 1.74E-21   |
| ZNF217   | 0.331  | 0.217  | 0.233  | 0.329  | 0.67   | 1.53E-16   |
| LRP8     | -0.039 | -0.134 | -0.124 | -0.539 | -1.258 | 3.14E-106  |
| TUBA1A   | 0.18   | -0.151 | -0.214 | 0.164  | 0.686  | 4.25E-30   |
| TFPI2    | 0.063  | 0.032  | -0.106 | 0.105  | 0.846  | 2.38E-83   |
| FXR1     | 0.157  | 0.185  | 0.147  | 0.422  | 0.631  | 9.84E-20   |
| TMEM187  | -0.089 | -0.065 | 0.143  | 0.57   | 0.686  | 3.39E-13   |
| SNN      | 0.348  | 0.008  | -0.373 | -0.346 | 0.774  | 6.18E-43   |
| CDC7     | -0.231 | -0.2   | -0.22  | -0.412 | -1.261 | 4.07E-44   |
| CDC45    | 0.187  | 0.107  | -0.297 | -0.526 | -1.255 | 1.34E-72   |
| HYAL3    | 0.087  | 0.118  | 0.349  | 0.47   | 0.803  | 1.43E-10   |
| NCK2     | 0.162  | -0.046 | -0.203 | 0.029  | 0.575  | 8.22E-11   |
| TPST2    | 0.003  | -0.076 | -0.066 | -0.069 | 0.733  | 4.49E-37   |
| PPFIBP1  | 0.028  | 0.369  | 0.403  | 0.406  | 0.594  | 4.54E-36   |
| KCNAB2   | 0.248  | -0.24  | 0.072  | 0.49   | 0.599  | 0.0000194  |
| IFITM1   | 0.1    | -0.065 | -0.128 | 0.281  | 0.743  | 0.00000356 |
| PIR      | 0.167  | 0.016  | 0.008  | 0.283  | 0.742  | 1.84E-40   |
| RGS20    | -0.047 | 0.301  | 0.625  | 0.407  | 0.63   | 3.6E-09    |
| PLPP2    | 0.011  | -0.156 | -0.37  | -0.305 | 0.649  | 0.000133   |
| RNASSET2 | 0.057  | -0.125 | -0.06  | 0.235  | 0.703  | 1.7E-12    |
| PCDHGB4  | 0.285  | 0.217  | -0.012 | 0.275  | 0.816  | 0.00000802 |
| AKR1C3   | -0.194 | -0.106 | -0.129 | -0.071 | -1.132 | 1.64E-103  |
| NUMB     | 0.092  | 0.039  | 0.042  | 0.221  | 0.586  | 1.64E-24   |
| TNKS     | -0.106 | 0.21   | 0.149  | 0.263  | 0.624  | 1.42E-18   |
| IRS2     | -0.258 | 0.288  | -0.266 | -0.453 | -1.526 | 8.55E-43   |
| CTSF     | -0.063 | -0.001 | -0.077 | 0.067  | 0.745  | 3.14E-26   |
| ADAM15   | -0.047 | -0.053 | -0.012 | 0.225  | 0.656  | 1.23E-27   |
| CREG1    | 0.159  | 0.229  | 0.128  | 0.394  | 0.824  | 2.06E-21   |
| NRP2     | 0.092  | -0.027 | -0.086 | 0.206  | 0.774  | 5.3E-26    |
| SOCS2    | 0.067  | 0.49   | 0.17   | -0.027 | 0.791  | 3.55E-07   |
| ALDH1A2  | 0.207  | 0.017  | 0.153  | 0.51   | 0.614  | 3.44E-10   |
| IER3     | 0.046  | 0.276  | 0.236  | 0.233  | 0.7    | 4.56E-39   |
| ARHGEF7  | -0.352 | 0.084  | 0.18   | 0.124  | 0.596  | 1.5E-50    |
| SKAP2    | 0.191  | 0.105  | 0.081  | 0.531  | 0.678  | 1.19E-17   |

|          |        |        |        |        |        |          |
|----------|--------|--------|--------|--------|--------|----------|
| CLIC3    | 0.484  | -0.038 | -0.39  | -0.193 | -1.018 | 3.14E-18 |
| PAPSS2   | 0.402  | 0.155  | -0.132 | 0.146  | -1.133 | 9.78E-11 |
| LDB2     | 0.135  | -0.506 | -0.703 | -0.576 | -1.139 | 1.74E-34 |
| PKMYT1   | 0.144  | 0.15   | -0.198 | -0.356 | -1.116 | 9.69E-42 |
| IL1RL1   | 0.252  | 0.076  | -0.4   | -0.477 | -2.633 | 2.6E-112 |
| ZBED1    | 0.435  | 0.196  | -0.213 | 0.094  | 0.582  | 9.96E-19 |
| SLC16A7  | 0.363  | -0.124 | -0.235 | -0.465 | -1.635 | 9.63E-67 |
| CYTH3    | 0.412  | 0.101  | 0.073  | 0.304  | 0.586  | 1.82E-16 |
| ADGRG1   | 0.314  | 0.063  | 0.086  | 0.449  | 0.788  | 4.44E-24 |
| B4GALT6  | 0.139  | 0.265  | 0.132  | 0.174  | 0.661  | 0.000581 |
| ZFYVE9   | 0.123  | -0.178 | 0.025  | 0.358  | 0.59   | 4.45E-17 |
| FAM189A2 | -0.361 | 0.024  | 0.37   | -0.175 | 0.742  | 1.03E-17 |
| MED17    | 0.497  | 0.205  | 0.18   | 0.222  | 0.604  | 0.000525 |
| ITM2B    | 0.235  | 0.138  | 0.019  | 0.271  | 0.674  | 1.98E-33 |
| RASAL2   | 0.045  | -0.096 | -0.154 | -0.121 | 0.627  | 1.44E-32 |
| IL27RA   | 0.196  | 0.063  | 0.032  | 0.472  | 0.769  | 6.41E-21 |
| SLC4A8   | -0.382 | -0.417 | 0.111  | 0.182  | 0.797  | 1.75E-29 |
| NPEPPS   | 0.213  | 0.117  | 0.157  | 0.377  | 0.614  | 1.09E-17 |
| VPS4B    | 0.373  | 0.279  | 0.213  | 0.464  | 0.62   | 4.56E-12 |
| NCOR1    | 0.057  | -0.011 | 0.068  | 0.323  | 0.605  | 2.33E-19 |
| MICAL2   | 0.463  | -0.059 | 0.103  | 0.525  | 0.731  | 1.5E-18  |
| PPM1F    | -0.125 | -0.307 | 0.148  | 0.351  | 0.705  | 2.38E-51 |
| SDC3     | 0.199  | 0.244  | 0.21   | 0.536  | 0.636  | 7.66E-11 |
| RAPGEF2  | 0.338  | 0.169  | 0.185  | 0.34   | 0.613  | 1.67E-19 |
| TRAM2    | -0.154 | -0.212 | 0.151  | 0.288  | 0.758  | 6.86E-63 |
| TOX      | -0.502 | -0.015 | -0.426 | -0.202 | -1.606 | 8.79E-42 |
| SUSD6    | 0.434  | 0.442  | 0.399  | 0.086  | 0.738  | 2.4E-32  |
| RB1CC1   | 0.257  | 0.314  | 0.243  | 0.405  | 0.594  | 8.59E-12 |
| GIN51    | 0.054  | 0.009  | -0.194 | -0.277 | -0.966 | 2.95E-37 |
| CEP170   | -0.076 | 0.033  | 0.074  | 0.252  | 0.606  | 3.31E-25 |
| KLHL21   | 0.527  | 0.294  | 0.271  | 0.285  | 0.6    | 7.46E-21 |
| RNF10    | 0.166  | 0.068  | 0.08   | 0.344  | 0.607  | 1.4E-20  |
| MVP      | 0.297  | 0.051  | 0.061  | 0.498  | 0.78   | 9.43E-09 |
| HDAC5    | 0.358  | 0.404  | 0.348  | 0.472  | 0.716  | 5.07E-13 |
| DNAJB6   | 0.175  | 0.045  | 0.052  | 0.324  | 0.645  | 2.06E-16 |
| TSPAN5   | 0.109  | -0.253 | -0.127 | 0.181  | 0.675  | 4.29E-38 |
| SLC25A13 | 0.281  | -0.035 | 0.021  | 0.395  | 0.625  | 4.99E-18 |
| DHRS9    | 0.097  | -0.059 | -0.31  | -0.249 | -1.136 | 3.21E-36 |

|          |        |        |        |        |        |           |
|----------|--------|--------|--------|--------|--------|-----------|
| MPZL2    | -0.235 | -0.164 | -0.157 | 0.085  | 0.611  | 6.49E-37  |
| PAK4     | 0.098  | -0.258 | -0.202 | 0.278  | 0.582  | 2.6E-15   |
| HMG20A   | 0.057  | 0.119  | 0.15   | 0.493  | 0.836  | 6.05E-33  |
| CPQ      | 0.111  | 0.039  | -0.08  | 0.29   | 0.601  | 1.4E-13   |
| COG5     | 0.266  | 0.064  | 0.138  | 0.397  | 0.619  | 1.25E-23  |
| FST      | -0.01  | 0.992  | 0.195  | -0.086 | -2.006 | 5.53E-201 |
| UNC13B   | 0.042  | 0.175  | 0.472  | 0.576  | 0.636  | 5.75E-57  |
| FBLN5    | 0.389  | 0.053  | -0.248 | 0.067  | -1.244 | 3.16E-26  |
| SORBS1   | 0.504  | 0.174  | 0.178  | 0.15   | 0.626  | 3.96E-07  |
| IFITM2   | 0.178  | -0.025 | 0.045  | 0.471  | 0.592  | 1.14E-12  |
| PAIP1    | 0.12   | 0.007  | -0.175 | 0.093  | 0.597  | 5.52E-22  |
| RAD51AP1 | -0.125 | 0.033  | -0.18  | -0.298 | -1.318 | 4.75E-72  |
| CAMKK2   | -0.046 | 0.088  | 0.243  | 0.296  | 0.683  | 6.94E-49  |
| RRAGA    | 0.266  | -0.039 | -0.008 | 0.561  | 0.659  | 2.23E-16  |
| GNB5     | 0.161  | 0.035  | 0.106  | 0.281  | 0.603  | 4.05E-10  |
| NES      | -0.221 | -0.074 | 0.098  | -0.086 | 0.725  | 1.15E-42  |
| FGL2     | 0.517  | 0.063  | -0.45  | -0.081 | -1.989 | 3.99E-80  |
| NPFFR2   | -0.08  | -0.19  | -0.338 | 0.422  | 0.809  | 2.33E-14  |
| UGT2A1   | -0.147 | -0.036 | -0.392 | -0.284 | -1.689 | 4.5E-22   |
| TOMM34   | 0.115  | -0.063 | -0.026 | 0.308  | 0.66   | 2.91E-16  |
| OS9      | 0.202  | 0.123  | 0.061  | 0.403  | 0.594  | 4.71E-10  |
| CCNI     | 0.309  | 0.23   | 0.204  | 0.456  | 0.586  | 5.47E-17  |
| MID2     | -0.282 | 0.047  | 0.088  | 0.294  | 0.605  | 3.97E-17  |
| SLC35D2  | 0.032  | -0.228 | 0.156  | 0.231  | 0.693  | 2.11E-13  |
| DNAJB4   | -0.258 | -0.025 | -0.469 | -0.31  | -1.078 | 3.75E-24  |
| PRSS23   | 0.248  | 0.005  | -0.131 | 0.153  | 0.844  | 9.17E-70  |
| BTN3A2   | -0.127 | 0.033  | 0.173  | 0.345  | 0.815  | 9.12E-32  |
| WDR45    | -0.187 | 0.04   | 0.324  | 0.206  | 0.664  | 1.07E-18  |
| RABL2B   | -0.28  | 0.184  | 0.55   | 0.291  | 0.671  | 5.75E-24  |
| FSTL1    | 0.273  | 0.073  | -0.06  | 0.281  | 0.662  | 1.15E-29  |
| SLC2A6   | -0.015 | 0.361  | 0.146  | 0.041  | 0.609  | 4.45E-25  |
| TP53TG1  | -0.054 | 0.133  | 0.547  | 0.383  | 0.655  | 1.49E-07  |
| KLF12    | 0.18   | -0.051 | 0.345  | 0.294  | 0.624  | 5.7E-18   |
| MGAT4B   | 0.14   | 0.123  | 0.019  | 0.127  | 0.711  | 1.24E-40  |
| TWF2     | 0.268  | 0.04   | 0.007  | 0.455  | 0.844  | 1.03E-20  |
| MRAS     | 0.29   | -0.103 | -0.245 | -0.061 | 0.761  | 9.07E-10  |
| CLSTN1   | 0.204  | 0.095  | -0.009 | 0.42   | 0.749  | 4.1E-15   |
| ZBTB1    | 0.354  | 0.093  | 0.28   | 0.428  | 0.657  | 8.15E-20  |

|           |        |        |        |        |        |            |
|-----------|--------|--------|--------|--------|--------|------------|
| KIFAP3    | 0.302  | 0.135  | 0.071  | 0.52   | 0.573  | 0.00000313 |
| RAB3GAP1  | 0.283  | 0.329  | 0.216  | 0.477  | 0.619  | 9.33E-10   |
| PTGR1     | 0.156  | 0.257  | 0.189  | 0.563  | 0.629  | 3.18E-25   |
| TTLL5     | 0.127  | -0.076 | 0.113  | 0.48   | 0.724  | 2.12E-20   |
| CDK19     | -0.188 | 0.251  | 0.308  | 0.414  | 0.783  | 9.24E-22   |
| CEP68     | -0.122 | -0.008 | 0.063  | 0.133  | 0.631  | 1.17E-21   |
| CYFIP1    | 0.376  | 0.206  | 0.165  | 0.531  | 0.747  | 1.37E-09   |
| PSME4     | 0.188  | 0.354  | 0.276  | 0.501  | 0.584  | 1.87E-17   |
| TRIM2     | 0.206  | 0.011  | -0.013 | 0.154  | 0.726  | 4.21E-13   |
| MAN2B2    | 0.093  | 0.078  | -0.049 | 0.29   | 0.625  | 2.88E-11   |
| KHNYN     | 0.265  | 0.305  | 0.531  | 0.395  | 0.655  | 3.42E-31   |
| HAUS5     | -0.329 | 0.051  | -0.032 | -0.552 | -1.133 | 2.99E-37   |
| PSD3      | 0.309  | -0.015 | -0.115 | 0.209  | 0.866  | 6.3E-25    |
| COTL1     | 0.19   | 0.072  | 0.033  | 0.349  | 0.795  | 1.79E-35   |
| NCS1      | 0.429  | 0.086  | -0.089 | 0.129  | 0.685  | 1.72E-20   |
| NOMO1     | #N/A   | #N/A   | #N/A   | #N/A   | #N/A   | #N/A       |
| RPL13A    | -0.067 | 0.008  | 0.128  | 0.134  | 0.657  | 1.04E-28   |
| CORO1C    | 0.142  | -0.088 | 0.044  | 0.331  | 0.819  | 1.18E-102  |
| CD2AP     | 0.231  | 0.208  | 0.085  | 0.382  | 0.627  | 8.05E-14   |
| MKRN1     | 0.307  | 0.14   | 0.098  | 0.465  | 0.665  | 4.9E-12    |
| FAM89B    | 0.201  | -0.127 | -0.163 | -0.141 | 0.683  | 2.69E-54   |
| LDOC1     | 0.076  | -0.005 | 0.049  | 0.446  | 0.699  | 2.63E-13   |
| PLD3      | 0.167  | -0.008 | -0.056 | 0.404  | 0.738  | 6.98E-20   |
| SLC7A11   | 0.084  | 0.386  | -0.171 | -0.287 | -1.792 | 7.72E-161  |
| MAFF      | -0.234 | 0.491  | 0.46   | 0.233  | 0.669  | 2.25E-29   |
| APOL2     | -0.065 | 0.348  | 0.702  | 0.382  | 0.711  | 2.56E-38   |
| BCL2L13   | 0.25   | 0.105  | 0.209  | 0.486  | 0.668  | 1.84E-34   |
| FBXL2     | -0.315 | -0.503 | -0.084 | -0.13  | 0.597  | 1.35E-28   |
| DNAH1     | -0.332 | 0.089  | 0.006  | -0.192 | 0.787  | 1.14E-11   |
| SIPA1L1   | 0.101  | 0.101  | 0.261  | 0.228  | 0.629  | 2.11E-16   |
| RAB11FIP5 | -0.055 | -0.026 | 0.179  | 0.37   | 0.615  | 3.72E-22   |
| RAI14     | 0.276  | -0.099 | 0.249  | 0.499  | 0.603  | 1.79E-32   |
| FAM127B   | 0.186  | 0.125  | 0.176  | 0.498  | 0.644  | 5.99E-11   |
| TCTN3     | 0.133  | 0.061  | 0.094  | 0.433  | 0.695  | 9.83E-17   |
| PHF19     | -0.433 | -0.584 | -0.518 | -0.445 | -1.105 | 2.28E-59   |
| RIBC2     | -0.222 | 0.055  | 0.234  | -0.308 | -2.195 | 2.36E-32   |
| FBXW8     | 0.262  | 0.026  | 0.195  | 0.233  | 0.601  | 7.11E-09   |
| FBXO22    | 0.427  | 0.686  | 0.822  | 0.456  | 0.648  | 8.34E-22   |



|         |        |        |        |        |        |           |
|---------|--------|--------|--------|--------|--------|-----------|
| FBXO5   | -0.232 | -0.27  | -0.377 | -0.295 | -1.259 | 4.45E-73  |
| SEZ6L2  | 0.163  | 0.024  | 0.041  | 0.474  | 0.658  | 0.0000857 |
| GREM1   | 0.331  | 0.127  | -0.251 | -0.248 | 0.729  | 6.53E-22  |
| STEAP1  | -0.406 | -0.443 | -0.49  | -0.449 | -1.557 | 2.32E-79  |
| ANKRD1  | 0.002  | -0.047 | -0.117 | -0.043 | -1.014 | 6.69E-70  |
| STAU2   | 0.026  | 0.104  | 0.228  | 0.517  | 0.726  | 7.31E-22  |
| FOXP1   | -0.017 | -0.137 | -0.075 | 0.295  | 0.633  | 5.87E-27  |
| SLCO4A1 | -0.133 | -0.32  | -0.147 | -0.371 | -1.34  | 8.55E-27  |
| AAMDC   | 0.156  | 0.022  | 0.138  | 0.36   | 0.648  | 8.3E-15   |
| IFT81   | -0.267 | 0.003  | 0.219  | 0.344  | 0.719  | 3.55E-12  |
| TMOD3   | 0.287  | 0.126  | 0.052  | 0.415  | 0.658  | 9.97E-15  |
| CARD10  | -0.096 | 0.065  | 0.304  | 0.391  | 0.617  | 1.29E-17  |
| PARVB   | 0.282  | -0.006 | 0.022  | 0.379  | 0.714  | 1.02E-22  |
| ZDHHC1  | -0.127 | -0.12  | 0.063  | -0.062 | 0.679  | 6.75E-09  |
| RBM15B  | 0.172  | -0.023 | -0.037 | 0.32   | 0.64   | 1.1E-16   |
| OSGIN1  | 0.146  | 0.337  | -0.261 | -0.281 | -1.217 | 1E-27     |
| CDR2L   | 0.312  | 0.097  | 0.022  | 0.164  | 0.806  | 2.33E-15  |
| CHST11  | 0.331  | -0.166 | -0.251 | -0.037 | 0.639  | 5.87E-23  |
| ANO7    | 0.013  | -0.001 | -0.292 | -0.305 | 0.711  | 0.0000043 |
| AK3     | 0.062  | 0.168  | 0.086  | 0.177  | 0.802  | 7.72E-64  |
| UBXN1   | 0.182  | 0.185  | 0.2    | 0.41   | 0.593  | 1.03E-18  |
| ZDHHC9  | 0.174  | 0.094  | 0.083  | 0.335  | 0.693  | 3.57E-19  |
| ING4    | -0.258 | -0.011 | 0.178  | 0.102  | 0.748  | 1.08E-24  |
| CERCAM  | 0.035  | -0.031 | 0.077  | 0.263  | 0.665  | 1.42E-24  |
| GOLM1   | 0.16   | 0.021  | -0.088 | 0.196  | 0.602  | 2.16E-16  |
| MEX3C   | 0.391  | 0.095  | 0.006  | 0.444  | 0.841  | 4.51E-27  |
| SNX7    | 0.042  | 0.091  | 0.135  | 0.416  | 0.595  | 9.29E-22  |
| EIF3L   | 0.234  | 0.169  | 0.228  | 0.429  | 0.684  | 3.68E-29  |
| PRKAG2  | 0.139  | 0.243  | 0.474  | 0.494  | 0.841  | 4.2E-29   |
| UBE2J1  | 0.399  | 0.023  | -0.008 | 0.155  | 0.599  | 2.01E-45  |
| LIMA1   | 0.256  | 0.122  | 0.004  | 0.397  | 0.589  | 1.12E-11  |
| CXXC5   | 0.396  | -0.328 | -0.023 | 0.069  | 0.6    | 1.16E-11  |
| CUTA    | 0.01   | -0.158 | -0.09  | 0.175  | 0.605  | 9.25E-26  |
| YPEL5   | 0.054  | 0.204  | 0.212  | 0.076  | 0.795  | 2.83E-25  |
| SARAF   | -0.007 | 0.018  | 0.086  | 0.262  | 0.837  | 2.82E-79  |
| NLK     | -0.222 | 0.043  | 0.156  | 0.101  | 0.648  | 3.19E-48  |
| CAB39   | 0.334  | 0.393  | 0.157  | 0.445  | 0.782  | 9.79E-21  |
| RTEL1   | -0.336 | 0.08   | 0.051  | -0.445 | -1.129 | 2.29E-39  |

|          |        |        |        |        |        |           |
|----------|--------|--------|--------|--------|--------|-----------|
| ERAP1    | 0.315  | 0.158  | 0.082  | 0.467  | 0.798  | 8.5E-20   |
| TM7SF3   | -0.006 | -0.011 | 0.153  | 0.403  | 0.658  | 1.62E-45  |
| SIX4     | 0.142  | 0.023  | -0.257 | -0.095 | 0.582  | 2.85E-09  |
| PHAX     | 0.224  | 0.133  | 0.078  | 0.445  | 0.601  | 2.64E-09  |
| CSNK1G1  | 0.013  | 0.306  | 0.23   | 0.186  | 0.66   | 7.85E-36  |
| A4GALT   | 0.211  | -0.009 | 0.025  | 0.26   | 0.674  | 5.11E-13  |
| ERRFI1   | 0.307  | 0.139  | 0.177  | 0.051  | 0.675  | 1.09E-24  |
| C11orf71 | -0.232 | 0.051  | -0.006 | -0.292 | -1.258 | 6.56E-20  |
| USP53    | -0.302 | 0.047  | 0.05   | 0.052  | 0.765  | 2.9E-63   |
| CCHCR1   | -0.155 | -0.087 | -0.079 | -0.265 | -1.019 | 1.08E-32  |
| EXOC6    | -0.512 | -0.412 | -0.816 | -0.525 | -0.99  | 2.29E-62  |
| ROBO4    | -0.093 | -0.147 | 0.1    | 0.415  | 0.791  | 1.86E-48  |
| LZTFL1   | 0.181  | 0.047  | 0.077  | 0.408  | 0.818  | 8.69E-18  |
| TRIM44   | 0.194  | 0.029  | 0.155  | 0.214  | 0.594  | 2.36E-32  |
| BNC2     | -0.035 | 0.028  | 0.118  | 0.315  | 0.6    | 3.89E-24  |
| VPS13C   | -0.295 | 0.133  | 0.378  | 0.186  | 0.599  | 2.02E-28  |
| RETSAT   | 0.161  | 0.335  | 0.43   | 0.515  | 0.687  | 3.34E-50  |
| FOCAD    | 0.328  | 0.01   | 0.073  | 0.379  | 0.693  | 5.7E-16   |
| UBE2R2   | 0.278  | -0.002 | -0.034 | 0.296  | 0.685  | 1.26E-18  |
| DUSP23   | -0.259 | -0.363 | -0.35  | -0.341 | -1.218 | 2.03E-42  |
| TMEM160  | -0.209 | 0.043  | -0.061 | 0.062  | 0.775  | 0.0000001 |
| GEMIN8   | -0.056 | -0.177 | 0.163  | 0.359  | 0.603  | 2.26E-11  |
| CLN6     | 0.077  | -0.068 | -0.258 | -0.213 | -0.984 | 2.66E-29  |
| TMEM51   | 0.095  | -0.083 | -0.091 | -0.134 | 0.812  | 2.65E-17  |
| TMEM38B  | -0.144 | -0.009 | -0.121 | -0.563 | -1.235 | 2.08E-22  |
| NADSYN1  | -0.062 | 0.413  | 0.536  | 0.239  | 0.666  | 4.1E-33   |
| MAP1S    | 0.223  | -0.094 | 0.208  | 0.49   | 0.639  | 1.54E-10  |
| ZNF532   | 0.355  | 0.048  | 0.085  | 0.23   | 0.61   | 1.66E-32  |
| P3H2     | 0.458  | 0.411  | 0.299  | 0.551  | 0.822  | 3.28E-09  |
| EXD2     | -0.006 | 0.034  | 0.261  | 0.474  | 0.62   | 8.77E-20  |
| UBA6     | 0.104  | 0.226  | 0.272  | 0.375  | 0.591  | 1.16E-22  |
| TMEM144  | -0.097 | 0.67   | 0.904  | 0.123  | 0.714  | 2E-12     |
| C19orf66 | -0.307 | 0.282  | 0.505  | 0.265  | 0.743  | 1E-28     |
| PI4K2A   | 0.219  | 0.093  | -0.048 | 0.282  | 0.601  | 5.55E-09  |
| GALNT10  | 0.258  | 0.021  | 0.002  | 0.29   | 0.801  | 2.44E-41  |
| AMBRA1   | 0.207  | 0.236  | 0.13   | 0.312  | 0.646  | 7.31E-13  |
| CHD7     | 0.379  | -0.046 | -0.219 | -0.578 | 0.718  | 4.67E-28  |
| BTBD2    | 0.054  | -0.098 | -0.082 | 0.27   | 0.585  | 4.56E-12  |

|          |        |        |        |        |        |          |
|----------|--------|--------|--------|--------|--------|----------|
| VPS35    | 0.27   | 0.017  | 0.025  | 0.459  | 0.623  | 4.99E-19 |
| TMEM30A  | 0.224  | 0.28   | 0.16   | 0.418  | 0.708  | 7.88E-42 |
| FGD6     | 0.339  | 0.307  | 0.163  | 0.261  | 0.659  | 1.79E-14 |
| EAF2     | 0.133  | -0.109 | -0.067 | -0.521 | -1.294 | 7.27E-09 |
| PCDHGB5  | 0.348  | 0.07   | -0.081 | 0.085  | 0.704  | 2.18E-09 |
| PCDHGB2  | 0.292  | -0.133 | -0.088 | 0.039  | 0.67   | 0.000142 |
| SERTAD4  | 0.404  | 0.036  | 0.186  | 0.299  | 0.591  | 0.0124   |
| BEX4     | 0.308  | 0.249  | 0.121  | 0.512  | 0.662  | 6.29E-11 |
| CTPS2    | -0.064 | -0.181 | 0.072  | 0.406  | 0.662  | 1.42E-17 |
| CHST7    | -0.218 | -0.179 | -0.124 | 0.106  | 0.796  | 4.33E-14 |
| FMN2     | 0.212  | -0.032 | -0.663 | -0.491 | -1.45  | 3.9E-12  |
| FSTL5    | -0.254 | -0.067 | 0.317  | 0.226  | 0.673  | 6.62E-14 |
| AGPAT3   | 0.129  | 0.009  | 0.125  | 0.363  | 0.59   | 4.5E-17  |
| MAP3K7CL | -0.336 | -0.194 | -0.063 | -0.303 | 0.581  | 1.18E-08 |
| ARNTL2   | 0.066  | 0.138  | 0.236  | 0.305  | 0.669  | 1.92E-38 |
| C16orf62 | 0.391  | 0.131  | 0.061  | 0.43   | 0.595  | 3.94E-10 |
| CHMP1B   | 0.488  | 0.282  | 0.164  | 0.441  | 0.86   | 4.03E-49 |
| RNPEPL1  | 0.165  | -0.062 | -0.005 | 0.171  | 0.77   | 5.68E-44 |
| PELI1    | 0.1    | 0.025  | 0.174  | 0.28   | 0.762  | 3.32E-27 |
| ASPHD2   | -0.288 | -0.138 | 0.019  | 0.266  | 0.748  | 1.12E-21 |
| RALGAPA2 | -0.257 | -0.141 | 0.05   | 0.03   | 0.59   | 9.07E-17 |
| RCN3     | 0.23   | 0.107  | 0.012  | 0.442  | 0.616  | 1.6E-11  |
| SPC25    | -0.399 | -0.313 | -0.249 | 0.081  | -1.426 | 9.51E-53 |
| ESYT2    | 0.313  | 0.094  | 0.008  | 0.156  | 0.587  | 5.87E-26 |
| HECW2    | 0.315  | 0.232  | 0.336  | 0.219  | 0.651  | 2.47E-20 |
| NCEH1    | 0.024  | 0.2    | 0.214  | 0.513  | 0.628  | 4.2E-22  |
| SIPA1L2  | 0.565  | 0.643  | 0.239  | 0.407  | 0.737  | 4.8E-18  |
| DOCK6    | 0.138  | -0.026 | 0.256  | 0.11   | 0.821  | 6.2E-47  |
| PCDH10   | 0.083  | -0.004 | -0.427 | -0.253 | -1.174 | 1.76E-38 |
| CFAP97   | 0.059  | 0.156  | 0.358  | 0.484  | 0.653  | 1.68E-20 |
| ZBTB4    | 0.138  | 0.043  | 0.195  | 0.409  | 0.749  | 3.76E-16 |
| EPG5     | -0.058 | 0.177  | 0.32   | 0.41   | 0.613  | 1.67E-25 |
| MARK4    | -0.003 | 0.08   | 0.013  | 0.096  | 0.586  | 4.68E-17 |
| CXCL16   | 0.034  | 0.029  | -0.058 | 0.219  | 0.594  | 0.0361   |
| MESDC1   | 0.118  | -0.146 | -0.14  | 0.055  | 0.584  | 2.03E-24 |
| CACNG6   | 0.325  | -0.254 | -0.424 | -0.317 | -1.123 | 1.42E-17 |
| PLEKHA1  | 0.097  | 0.335  | 0.237  | 0.118  | 0.613  | 4.51E-22 |
| SLC25A19 | -0.341 | -0.297 | -0.267 | -0.446 | -1.105 | 1.15E-26 |

|          |        |        |        |        |        |            |
|----------|--------|--------|--------|--------|--------|------------|
| ZFAND3   | 0.396  | 0.223  | 0.096  | 0.419  | 0.605  | 1.79E-07   |
| ROBO3    | -0.437 | 0.126  | 0.23   | -0.26  | -1.134 | 1.7E-33    |
| CREB3L2  | 0.006  | -0.104 | 0.061  | 0.201  | 0.759  | 1.01E-27   |
| FNDC3B   | 0.392  | 0.051  | 0.177  | 0.422  | 0.824  | 8.38E-23   |
| CERK     | 0.232  | -0.28  | 0.123  | 0.406  | 0.647  | 8.28E-60   |
| RMND5A   | 0.336  | 0.128  | 0.073  | 0.296  | 0.627  | 1.26E-20   |
| USP46    | 0.384  | 0.354  | 0.231  | 0.193  | 0.644  | 2.82E-15   |
| RASAL3   | -0.108 | -0.053 | 0.186  | 0.066  | 0.609  | 1.93E-16   |
| TMEM237  | -0.198 | -0.13  | 0.016  | 0.033  | 0.653  | 7.95E-21   |
| KRI1     | -0.507 | -0.052 | -0.031 | -0.279 | -0.976 | 1.36E-35   |
| AACS     | 0.371  | 0.115  | 0.056  | 0.208  | 0.676  | 3.28E-16   |
| GID4     | 0.165  | 0.346  | 0.227  | 0.302  | 0.612  | 3.74E-12   |
| TMEM106C | -0.469 | -0.082 | 0.111  | -0.176 | -1.107 | 4.01E-30   |
| DSCC1    | 0.001  | -0.059 | -0.084 | -0.163 | -1.186 | 1.43E-14   |
| BHLHE41  | -0.398 | 0.12   | -0.318 | -0.284 | -1.249 | 1.63E-07   |
| SPAG16   | 0.067  | -0.148 | 0.15   | 0.292  | 0.683  | 0.00000172 |
| CHPF     | 0.274  | 0.126  | -0.14  | -0.046 | -1.057 | 0.00000331 |
| FAT4     | 0.15   | -0.067 | -0.507 | -0.446 | -1.112 | 8.32E-34   |
| DYNC2H1  | #N/A   | #N/A   | #N/A   | #N/A   | #N/A   | #N/A       |
| C11orf80 | -0.311 | 0.007  | 0.407  | 0.167  | 0.607  | 4.42E-11   |
| E2F8     | -0.132 | -0.264 | -0.268 | -0.319 | -1.677 | 1.26E-72   |
| THSD4    | 0.439  | 0.093  | -0.292 | -0.051 | 0.595  | 2.97E-19   |
| FAM110D  | -0.552 | -0.216 | -0.031 | 0.237  | 0.618  | 3.62E-07   |
| SCD5     | -0.035 | -0.274 | -0.179 | 0.121  | 0.747  | 3.56E-48   |
| DSN1     | -0.115 | -0.02  | -0.225 | -0.403 | -1.165 | 8.38E-87   |
| SLC8B1   | -0.105 | 0.039  | 0.156  | 0.136  | 0.589  | 3.25E-25   |
| MYCT1    | 0.449  | 0.291  | 0.276  | 0.558  | 0.704  | 3.96E-35   |
| CCDC92   | 0.361  | 0.228  | 0.286  | 0.355  | 0.72   | 5.79E-19   |
| WDR26    | 0.019  | 0.148  | 0.181  | 0.211  | 0.648  | 4.41E-55   |
| PIGZ     | -0.52  | -0.047 | -0.15  | -0.266 | 0.733  | 6.68E-15   |
| PREX2    | -0.167 | -0.036 | -0.225 | -0.483 | -1.229 | 6.12E-65   |
| KCNIP4   | -0.292 | -0.465 | -0.513 | -0.187 | -1.041 | 0.00183    |
| TTYH3    | 0.236  | 0.032  | -0.014 | 0.249  | 0.707  | 4.58E-19   |
| COL18A1  | 0.313  | 0.08   | -0.065 | 0.287  | 0.656  | 1.98E-10   |
| CMIP     | 0.406  | -0.159 | 0.087  | 0.517  | 0.775  | 5.06E-25   |
| SH3BP5L  | -0.052 | 0.144  | 0.112  | 0.268  | 0.589  | 2.02E-16   |
| ITFG1    | 0.194  | 0.13   | -0.007 | 0.4    | 0.698  | 6.95E-40   |
| GDPD5    | -0.397 | -0.264 | 0.11   | -0.189 | 0.648  | 2.31E-26   |

|          |        |        |        |        |        |            |
|----------|--------|--------|--------|--------|--------|------------|
| FBXO38   | 0.112  | 0.212  | 0.329  | 0.458  | 0.657  | 5.42E-35   |
| TSPAN14  | 0.154  | -0.282 | -0.013 | 0.22   | 0.671  | 1.12E-54   |
| TCF7L1   | -0.026 | -0.128 | 0.234  | 0.387  | 0.811  | 2.36E-28   |
| PLVAP    | 0.296  | -0.07  | -0.275 | 0.245  | -1.466 | 1.26E-23   |
| AIF1L    | -0.207 | -0.154 | 0.174  | 0.365  | 0.839  | 3.42E-41   |
| MARVELD1 | 0.066  | 0.075  | 0.085  | 0.258  | 0.617  | 4.55E-28   |
| ARMC10   | -0.125 | -0.118 | -0.001 | -0.038 | 0.609  | 4.64E-21   |
| TMTC1    | -0.116 | 0.005  | -0.344 | -0.348 | -2.268 | 4.39E-94   |
| B3GNT5   | -0.137 | 0.12   | 0.03   | 0.063  | 0.643  | 7.08E-18   |
| MND1     | -0.329 | 0.067  | -0.163 | -0.385 | -1.267 | 1.86E-12   |
| FAM161A  | -0.351 | -0.141 | -0.111 | -0.481 | -1.311 | 7.96E-18   |
| CAPNS2   | -0.172 | -0.354 | -0.361 | -0.532 | -1.082 | 0.00704    |
| FAM213A  | -0.053 | -0.092 | 0.099  | 0.314  | 0.648  | 1.13E-23   |
| CYSTM1   | 0.044  | 0.044  | 0.124  | 0.218  | 0.638  | 2.34E-16   |
| CARD11   | 0.217  | -0.074 | -0.078 | 0.261  | 0.76   | 1.41E-23   |
| ZNF528   | -0.235 | 0.081  | 0.304  | 0.126  | 0.59   | 2.46E-10   |
| MCM8     | 0.003  | 0.135  | -0.051 | -0.321 | -1.125 | 4.97E-75   |
| PARD6G   | 0.072  | 0.649  | 0.534  | 0.527  | 0.822  | 0.0028     |
| COL25A1  | 0.506  | 0.183  | -0.004 | 0.004  | -1.935 | 2.32E-69   |
| GTPBP3   | -0.446 | -0.154 | -0.02  | -0.418 | -0.969 | 6.61E-31   |
| PLEKHA8  | -0.25  | 0.207  | 0.29   | 0.207  | 0.625  | 2.47E-32   |
| PLCD4    | 0.136  | -0.056 | 0.122  | 0.08   | 0.647  | 0.00297    |
| HPDL     | 0.196  | -0.441 | -0.705 | -0.232 | -1.13  | 2.96E-08   |
| TMEM25   | -0.387 | -0.101 | 0.122  | 0.326  | 0.827  | 1.66E-42   |
| RSPO3    | -0.481 | 0.44   | 0.023  | -0.186 | -2.299 | 1.03E-79   |
| TMTC4    | -0.123 | -0.059 | 0.131  | 0.142  | 0.743  | 1.12E-18   |
| ZNRF1    | 0.234  | 0.301  | 0.16   | 0.267  | 0.78   | 7.48E-23   |
| CEP19    | 0.013  | 0.031  | 0.067  | 0.316  | 0.69   | 0.00758    |
| SMIM3    | 0.065  | -0.071 | -0.137 | -0.143 | 0.751  | 0.00000264 |
| COL27A1  | -0.424 | 0.049  | 0.426  | -0.377 | 0.581  | 3.92E-17   |
| PAQR8    | -0.242 | -0.139 | -0.002 | 0.182  | 0.656  | 8.06E-30   |
| HELZ2    | 0.048  | 0.617  | 0.524  | 0.125  | 0.675  | 4.15E-27   |
| TNKS1BP1 | 0.019  | 0.104  | 0.21   | 0.248  | 0.773  | 1.11E-38   |
| NAV2     | -0.125 | -0.26  | 0.164  | 0.136  | 0.675  | 2.04E-33   |
| SEC11C   | -0.147 | -0.138 | -0.085 | -0.175 | -1.15  | 1.81E-18   |
| ZNF697   | 0.143  | 0.386  | 0.323  | 0.313  | 0.601  | 2.79E-11   |
| FMNL3    | 0.104  | 0.113  | 0.347  | 0.042  | 0.842  | 7.79E-36   |
| CCDC74B  | 0.067  | -0.165 | -0.509 | -0.547 | -1.476 | 5.85E-14   |

|          |        |        |        |        |        |           |
|----------|--------|--------|--------|--------|--------|-----------|
| SNX29    | 0.445  | 0.127  | 0.251  | 0.563  | 0.598  | 8.76E-08  |
| ZNF585B  | -0.154 | 0.493  | 0.47   | 0.436  | 0.594  | 0.000133  |
| TIFA     | 0.173  | 0.366  | -0.242 | -0.447 | 0.645  | 3.31E-26  |
| FAM114A1 | 0.41   | 0.172  | 0.179  | 0.394  | 0.625  | 1.17E-11  |
| CCDC102A | -0.346 | 0.102  | 0.144  | 0.082  | 0.858  | 9.29E-18  |
| ZNF561   | 0.087  | 0.645  | 0.754  | 0.331  | 0.82   | 5.47E-25  |
| PLCD3    | 0.554  | 0.273  | 0.265  | 0.416  | 0.685  | 1.22E-16  |
| KCTD12   | 0.321  | -0.1   | -0.376 | -0.168 | -1.187 | 3.39E-31  |
| PCMTD1   | 0.148  | 0.306  | 0.294  | 0.134  | 0.747  | 1.3E-21   |
| FCHO2    | 0.538  | 0.711  | 0.647  | 0.472  | 0.657  | 2.35E-27  |
| HSPA12B  | -0.33  | -0.309 | 0.119  | -0.044 | 0.791  | 1.01E-29  |
| SLC18B1  | -0.186 | -0.341 | -0.164 | 0.089  | 0.604  | 5.76E-16  |
| SPPL3    | 0.075  | 0.133  | 0.199  | 0.426  | 0.657  | 7.33E-12  |
| CMTM3    | 0.147  | -0.113 | 0.06   | 0.179  | 0.642  | 1.41E-33  |
| MFSD12   | -0.023 | 0.001  | -0.008 | -0.079 | 0.666  | 1.03E-33  |
| GALM     | -0.052 | -0.135 | -0.066 | 0.373  | 0.652  | 0.0000155 |
| DCBLD2   | 0.088  | -0.138 | -0.405 | -0.191 | 0.771  | 1.06E-82  |
| GLYCTK   | -0.407 | 0.113  | -0.003 | -0.335 | -1.037 | 2.52E-28  |
| JMY      | 0.101  | 0.265  | 0.345  | 0.148  | 0.615  | 1.33E-10  |
| TMEM171  | 0.093  | -0.09  | -0.029 | 0.071  | -1.208 | 3.15E-28  |
| PM20D2   | 0.058  | 0.308  | 0.353  | 0.46   | 0.799  | 8.29E-24  |
| SPIN4    | 0.068  | -0.393 | -0.456 | -0.249 | -1.399 | 4.33E-40  |
| NEK7     | -0.206 | -0.11  | -0.366 | -0.493 | -1.339 | 3.55E-97  |
| MIB2     | -0.286 | 0.114  | 0.416  | 0.039  | 0.605  | 1.55E-13  |
| EIF3LP2  | 0.314  | 0.047  | 0.154  | 0.514  | 0.707  | 2.37E-10  |
| LDLRAD3  | 0.325  | -0.094 | 0.029  | 0.327  | 0.63   | 3.12E-20  |
| ST13P5   | 0.106  | -0.043 | -0.018 | 0.329  | 0.637  | 2.85E-10  |
| HMGA1P3  | 0.13   | -0.176 | 0.066  | 0.426  | 0.665  | 1.39E-08  |
| MDP1     | -0.238 | -0.268 | -0.198 | -0.475 | -0.971 | 0.00385   |
| TICAM1   | 0.518  | 0.253  | -0.031 | 0.172  | 0.59   | 3.39E-07  |
| ZNF827   | 0.229  | -0.055 | 0.358  | 0.385  | 0.653  | 8.53E-25  |
| SHISA3   | -0.536 | -0.115 | -0.549 | -0.51  | -2.817 | 1.36E-90  |
| CREBRF   | -0.125 | 0.484  | 0.206  | -0.044 | 0.601  | 1.28E-10  |
| CNKSR3   | 0.523  | 0.712  | -0.058 | -0.116 | 0.63   | 8.75E-21  |
| GIMAP8   | -0.477 | 0.157  | -0.083 | 0.01   | -0.945 | 2.04E-27  |
| TMEM65   | 0.243  | -0.016 | 0.047  | 0.318  | 0.725  | 7.74E-40  |
| USP54    | -0.155 | -0.026 | -0.145 | 0.078  | 0.796  | 5.46E-33  |
| SPRED1   | 0.574  | -0.081 | -0.025 | 0.163  | 0.714  | 2.9E-36   |

|          |        |        |        |        |        |            |
|----------|--------|--------|--------|--------|--------|------------|
| ZNF846   | -0.043 | 0.479  | 0.521  | 0.281  | 0.614  | 0.000816   |
| ZNF579   | 0.103  | 0.262  | 0.211  | 0.056  | 0.72   | 0.00000038 |
| FAM171B  | 0.204  | 0.266  | 0.159  | 0.13   | 0.618  | 1.28E-10   |
| SCAMP5   | -0.146 | -0.137 | 0.154  | 0.5    | 0.709  | 5.38E-13   |
| APOBEC3F | -0.416 | -0.03  | 0.474  | 0.444  | 0.597  | 0.00000557 |
| SPRED2   | 0.377  | 0.241  | 0.313  | 0.439  | 0.688  | 2.57E-08   |
| CEP112   | 0.279  | 0.053  | -0.003 | 0.171  | 0.623  | 6.53E-09   |
| SLC25A43 | 0.209  | 0.12   | 0.186  | 0.344  | 0.587  | 2.26E-08   |
| TRIML2   | 0.269  | 0.609  | 0.733  | 0.391  | 0.627  | 1.02E-08   |
| DHRSX    | -0.078 | 0.054  | 0.037  | 0.203  | 0.664  | 2.67E-17   |
| ZCCHC24  | 0.179  | -0.127 | 0.169  | 0.27   | 0.687  | 1.05E-10   |
| SLC37A2  | 0.014  | 0.094  | 0.368  | 0.298  | 0.822  | 0.000698   |
| ZNF438   | -0.103 | -0.086 | 0.376  | 0.567  | 0.713  | 3.8E-33    |
| C10orf25 | -0.38  | -0.248 | 0.083  | 0.495  | 0.736  | 2.99E-09   |
| REEP3    | 0.015  | 0.015  | 0.019  | 0.029  | 0.695  | 3E-33      |
| JMJD1C   | -0.291 | 0.081  | 0.2    | 0.133  | 0.752  | 7.63E-36   |
| FAM171A1 | 0.21   | 0.015  | -0.043 | 0.348  | 0.835  | 7.83E-33   |
| SDK1     | 0.09   | -0.1   | 0.049  | 0.064  | -1.101 | 1.05E-29   |
| PRR15    | #N/A   | #N/A   | #N/A   | #N/A   | #N/A   | #N/A       |
| ANKRD18A | -0.079 | -0.08  | -0.012 | -0.499 | -1.258 | 5.48E-24   |
| ZDHHC23  | 0.5    | 0.217  | 0.037  | -0.354 | -1.159 | 1.7E-33    |
| RNF144B  | -0.482 | -0.213 | -0.411 | -0.303 | -1.147 | 2.37E-31   |
| SNX33    | -0.166 | 0.062  | 0.065  | 0.321  | 0.783  | 2.54E-40   |
| PGM2L1   | 0.328  | 0.367  | 0.166  | 0.398  | 0.822  | 3.45E-20   |
| OTOGL    | 0.078  | 0.005  | -0.538 | -0.531 | -3.275 | 7.91E-155  |
| EXOC3L1  | 0.318  | -0.166 | -0.396 | -0.485 | -1.692 | 1.96E-39   |
| NPW      | #N/A   | #N/A   | #N/A   | #N/A   | #N/A   | #N/A       |
| FAM171A2 | 0.196  | 0.083  | -0.363 | -0.12  | 0.805  | 8.67E-17   |
| KCTD1    | 0.049  | 0.106  | 0.066  | 0.373  | 0.678  | 3.63E-09   |
| WDR62    | -0.331 | -0.274 | -0.222 | -0.579 | -1.37  | 6.85E-50   |
| RNF149   | -0.066 | -0.011 | 0.205  | 0.258  | 0.756  | 2.22E-37   |
| SUMF1    | 0.153  | 0.109  | 0.093  | 0.435  | 0.743  | 5.13E-20   |
| PRRT3    | 0.22   | -0.348 | 0.119  | 0.377  | 0.674  | 9.2E-08    |
| RNF180   | -0.231 | -0.067 | -0.124 | -0.052 | 0.625  | 0.000331   |
| PPM1J    | -0.423 | 0.199  | 0.378  | 0.148  | 0.684  | 0.000285   |
| RAB43    | -0.275 | -0.043 | -0.167 | -0.091 | 0.568  | 0.00156    |
| ZNF260   | 0.392  | 0.283  | 0.128  | 0.153  | 0.626  | 1.24E-12   |
| SLC35E4  | -0.05  | 0.029  | 0.026  | 0.079  | 0.651  | 3.17E-13   |

|            |        |        |        |        |        |            |
|------------|--------|--------|--------|--------|--------|------------|
| PGDP1      | 0.374  | 0.047  | 0.004  | 0.472  | 0.652  | 0.00000527 |
| HNRNPCL1   | 0.446  | -0.049 | -0.118 | 0.232  | 0.594  | 1.05E-07   |
| TMEM255B   | -0.004 | -0.041 | 0.079  | 0.114  | 0.618  | 3.15E-45   |
| HLA-V      | -0.011 | -0.255 | -0.041 | 0.22   | 0.701  | 0.000179   |
| ZNF710     | -0.079 | -0.216 | 0.121  | 0.292  | 0.607  | 1.04E-20   |
| SAMD5      | 0.01   | 0.247  | 0.251  | 0.408  | 0.626  | 5.69E-09   |
| FRRS1      | 0.126  | -0.047 | -0.255 | -0.551 | -1.267 | 4.48E-14   |
| C4orf48    | -0.305 | -0.184 | -0.163 | -0.207 | 0.702  | 3.9E-12    |
| LINC00997  | 0.151  | -0.116 | -0.011 | -0.036 | 0.597  | 0.019      |
| MXRA7      | 0.083  | 0.029  | 0.057  | 0.202  | 0.656  | 8.58E-42   |
| EIF2AK4    | 0.151  | 0.071  | 0.215  | 0.505  | 0.793  | 7.31E-32   |
| ANKRD18B   | 0.212  | 0.012  | -0.235 | -0.313 | -1.149 | 1.17E-21   |
| NRARP      | 0.472  | -0.237 | -0.024 | 0.282  | 0.665  | 3.9E-20    |
| FAM127C    | 0.361  | 0.039  | 0.03   | 0.446  | 0.688  | 1.12E-14   |
| ACOT1      | -0.098 | -0.099 | -0.047 | 0.249  | 0.64   | 0.00282    |
| SMIM15     | 0.057  | -0.054 | 0.056  | 0.391  | 0.686  | 1.1E-31    |
| MAP1LC3B2  | 0.108  | 0.045  | 0.077  | 0.287  | 0.69   | 6.96E-19   |
| HRCT1      | 0.128  | 0.052  | -0.188 | 0.013  | -1.53  | 7.8E-41    |
| PEBP1P2    | 0.204  | -0.3   | -0.154 | 0.327  | 0.643  | 4.44E-15   |
| LYPLA2P1   | 0.284  | 0.066  | 0.211  | 0.499  | 0.652  | 2.05E-12   |
| C16orf52   | -0.061 | -0.06  | -0.137 | -0.535 | -0.962 | 2.39E-29   |
| RELL1      | -0.087 | 0.183  | 0.182  | 0.173  | 0.658  | 9.07E-21   |
| SLC25A21-A | -0.192 | 0.135  | -0.179 | -0.209 | -1.429 | 8.42E-11   |
| JMJD7      | -0.434 | -0.045 | 0.063  | -0.511 | -1.173 | 4E-17      |
| MIR1204    | #N/A   | #N/A   | #N/A   | #N/A   | #N/A   | #N/A       |
| HOTTIP     | -0.427 | 0.15   | 0.36   | 0.413  | 0.623  | 0.00000941 |
| PMF1-BGLAI | -0.385 | 0.194  | -0.363 | -0.126 | 0.59   | 0.00743    |
| MYZAP      | 0.256  | -0.415 | -0.021 | 0.114  | 0.748  | 1.17E-11   |
| RNU6-301P  | -0.293 | 0.409  | 0.293  | -0.278 | 0.663  | 0.00104    |
| ACVR1B     | -0.096 | 0.101  | 0.028  | -0.172 | -0.664 | 1.69E-29   |
| ACYP1      | -0.224 | -0.199 | -0.009 | -0.147 | -0.812 | 3.06E-16   |
| ADRA1B     | 0.417  | -0.525 | -0.711 | -0.283 | -0.769 | 1.79E-17   |
| ALCAM      | 0.113  | 0.106  | -0.106 | 0.162  | -0.617 | 3.75E-19   |
| ALDH1A1    | 0.125  | 0.056  | -0.023 | 0.54   | -0.718 | 5.56E-21   |
| ALDOC      | 0.193  | 0.066  | -0.218 | 0.048  | -0.852 | 8.15E-12   |
| ANG        | 0.268  | -0.093 | -0.353 | -0.113 | -0.633 | 0.00086    |
| APBA1      | 0.012  | -0.326 | -0.487 | -0.33  | -0.799 | 4.25E-10   |
| ATP6V0B    | -0.148 | -0.111 | -0.158 | -0.389 | -0.704 | 4.97E-18   |



|         |        |        |        |        |        |            |
|---------|--------|--------|--------|--------|--------|------------|
| HCN2    | 0.31   | 0.016  | -0.136 | -0.144 | -0.82  | 8.29E-08   |
| BMP6    | 0.148  | 0.073  | -0.165 | 0.09   | -0.717 | 5.49E-19   |
| BRCA1   | 0.028  | 0.14   | 0.021  | 0.027  | -0.579 | 3.85E-16   |
| BRCA2   | 0.082  | 0.052  | -0.186 | -0.309 | -0.823 | 9.25E-36   |
| CA12    | 0.256  | -0.021 | -0.177 | -0.065 | -0.889 | 1.46E-09   |
| CBLB    | -0.315 | -0.097 | -0.519 | -0.451 | -0.691 | 1.62E-14   |
| CCNA2   | -0.504 | -0.78  | -0.736 | -0.267 | -0.755 | 1.76E-48   |
| ABCC2   | -0.059 | 0.027  | -0.028 | -0.303 | -0.819 | 0.000214   |
| DCK     | -0.013 | -0.172 | -0.312 | -0.507 | -0.704 | 1.07E-18   |
| AKR1C1  | -0.085 | -0.225 | -0.162 | -0.097 | -0.696 | 0.0000194  |
| TIMM8A  | -0.163 | -0.042 | 0.022  | -0.305 | -0.769 | 3.38E-15   |
| DHODH   | -0.054 | -0.033 | -0.137 | -0.235 | -0.894 | 1.04E-17   |
| TRDMT1  | -0.061 | -0.232 | -0.104 | -0.331 | -0.815 | 1.08E-07   |
| EMP1    | 0.387  | -0.205 | -0.33  | -0.078 | -0.645 | 2.75E-36   |
| EPS8    | 0.287  | 0.339  | -0.004 | 0.023  | -0.722 | 6.32E-21   |
| FANCG   | -0.08  | -0.08  | -0.213 | -0.408 | -0.943 | 1.42E-30   |
| GALC    | 0.011  | 0.059  | -0.137 | 0.182  | -0.629 | 2.23E-18   |
| GHR     | -0.084 | -0.292 | -0.337 | -0.348 | -0.642 | 0.000079   |
| GK      | -0.432 | -0.012 | -0.008 | -0.161 | -0.695 | 0.00015    |
| GCLM    | 0.324  | 0.135  | -0.109 | 0.046  | -0.675 | 4.29E-23   |
| GOLGA1  | -0.329 | -0.086 | 0.098  | -0.219 | -0.586 | 1.69E-15   |
| GSTA4   | -0.04  | -0.132 | -0.219 | -0.204 | -0.839 | 1.23E-16   |
| H1FO    | -0.194 | -0.798 | -0.386 | 0.026  | -0.898 | 5.35E-45   |
| H2AFX   | -0.526 | -0.741 | -0.723 | -0.366 | -0.877 | 1.23E-26   |
| HAS3    | -0.287 | 0.111  | -0.12  | -0.508 | -0.916 | 2.66E-10   |
| HGF     | -0.051 | 0.329  | 0.039  | -0.116 | -0.733 | 0.000439   |
| HMGB2   | -0.331 | -0.69  | -0.632 | -0.279 | -0.707 | 5.46E-29   |
| HMG2    | -0.201 | -0.097 | -0.072 | -0.251 | -0.81  | 1.8E-13    |
| HOXD1   | 0.183  | 0.438  | -0.053 | -0.094 | -0.635 | 2.2E-21    |
| IGF2    | 0.231  | -0.019 | -0.231 | -0.115 | -0.633 | 0.0012     |
| IGHMBP2 | -0.308 | 0.14   | -0.089 | -0.423 | -0.677 | 3.77E-33   |
| INHBA   | 0.145  | 0.28   | 0.016  | 0.068  | -0.599 | 2.55E-30   |
| IRF3    | -0.271 | -0.021 | 0.031  | -0.194 | -0.597 | 5.89E-14   |
| KCNMB1  | 0.161  | -0.098 | -0.022 | -0.347 | -0.664 | 0.0000115  |
| KIF11   | -0.166 | -0.343 | -0.482 | 0.06   | -0.575 | 3.03E-11   |
| KIFC1   | -0.573 | -0.574 | -0.404 | -0.169 | -0.901 | 4.33E-26   |
| LIPE    | -0.515 | -0.46  | -0.603 | -0.452 | -0.825 | 0.00000324 |
| MC1R    | -0.144 | 0.193  | 0.287  | -0.495 | -0.697 | 1.16E-08   |

|          |        |        |        |        |        |            |
|----------|--------|--------|--------|--------|--------|------------|
| MCM2     | 0.487  | 0.072  | -0.443 | -0.373 | -0.851 | 1.01E-10   |
| MCM4     | 0.538  | 0.034  | -0.495 | -0.496 | -0.635 | 2.57E-26   |
| MCM5     | 0.449  | 0.034  | -0.409 | -0.269 | -0.797 | 4.04E-17   |
| MEIS1    | -0.57  | -0.072 | -0.369 | -0.39  | -0.796 | 2.82E-18   |
| MGST1    | 0.042  | -0.01  | 0.009  | -0.068 | -0.97  | 1.07E-15   |
| MMP16    | 0.051  | -0.239 | -0.466 | -0.527 | -0.617 | 3.28E-23   |
| MOCS2    | -0.196 | 0.021  | 0.119  | -0.173 | -0.619 | 1.99E-08   |
| MT1X     | 0.107  | -0.03  | -0.177 | -0.171 | -0.807 | 7E-15      |
| MUTYH    | -0.48  | -0.075 | -0.042 | -0.444 | -0.869 | 1.35E-15   |
| NDUFB9   | -0.251 | -0.086 | -0.063 | -0.482 | -0.614 | 0.000396   |
| NDUFC2   | 0.005  | -0.181 | -0.276 | -0.279 | -0.76  | 2.16E-18   |
| NDUFV2P1 | -0.188 | -0.227 | -0.215 | -0.272 | -0.615 | 2.53E-08   |
| NQO2     | -0.151 | -0.091 | -0.051 | -0.207 | -0.73  | 5.01E-14   |
| NOS3     | -0.045 | -0.427 | -0.23  | -0.04  | -0.627 | 4.17E-15   |
| NRCAM    | 0.273  | 0.074  | -0.265 | -0.043 | -1.036 | 2.63E-26   |
| CNTN3    | 0.203  | -0.051 | -0.377 | -0.408 | -0.673 | 0.00000378 |
| PCNT     | -0.278 | 0.079  | 0.056  | -0.504 | -0.784 | 1.01E-32   |
| PDE3A    | -0.427 | 0.181  | 0.074  | -0.047 | -0.83  | 5.19E-45   |
| PFAS     | -0.079 | -0.039 | -0.133 | -0.165 | -0.594 | 6.52E-14   |
| ABCB1    | 0.051  | 0.453  | 0.074  | 0.27   | -0.597 | 8.77E-07   |
| PHKA1    | 0.027  | -0.103 | -0.156 | -0.145 | -0.752 | 1.34E-16   |
| PHKG2    | -0.212 | -0.038 | -0.243 | -0.57  | -0.686 | 6.6E-20    |
| PIGC     | -0.186 | -0.219 | -0.254 | -0.244 | -0.592 | 0.000061   |
| PIGF     | -0.225 | -0.107 | -0.075 | -0.349 | -0.649 | 5.88E-07   |
| PIGH     | -0.203 | -0.008 | 0.084  | -0.18  | -0.733 | 5.62E-11   |
| PLCL1    | -0.328 | -0.002 | -0.897 | -0.49  | -0.63  | 2.66E-22   |
| PMM1     | -0.376 | -0.147 | -0.009 | -0.521 | -0.673 | 1.15E-14   |
| EXOSC9   | 0.132  | 0.066  | -0.195 | -0.371 | -0.824 | 1.92E-56   |
| PNN      | -0.177 | -0.09  | -0.012 | -0.532 | -0.584 | 2.7E-12    |
| POLE2    | 0.016  | -0.076 | -0.215 | -0.403 | -1.025 | 3.05E-28   |
| POLR2G   | -0.122 | -0.104 | -0.034 | -0.2   | -0.602 | 8.57E-17   |
| PSMA6    | -0.233 | -0.073 | -0.075 | -0.393 | -0.597 | 0.00033    |
| RAD1     | 0.078  | -0.003 | -0.23  | -0.342 | -0.658 | 2.76E-32   |
| PEX2     | -0.211 | -0.311 | -0.237 | -0.392 | -0.837 | 6.62E-09   |
| RABGGTB  | 0.06   | 0.084  | 0.085  | -0.33  | -0.691 | 6.02E-16   |
| RFC2     | 0.286  | 0.034  | -0.355 | -0.179 | -0.7   | 7.37E-28   |
| RFC3     | 0.258  | 0.165  | -0.461 | -0.432 | -0.841 | 1.6E-61    |
| RFC4     | 0.195  | -0.11  | -0.26  | -0.356 | -0.847 | 9.9E-50    |

|         |        |        |        |        |        |            |
|---------|--------|--------|--------|--------|--------|------------|
| RFC5    | 0.083  | 0.035  | -0.212 | -0.299 | -0.96  | 1.56E-57   |
| SNORA63 | -0.48  | -0.075 | -0.138 | -0.562 | -1.059 | 0.000165   |
| RPA3    | -0.329 | -0.052 | 0.05   | -0.456 | -0.692 | 0.00000363 |
| RPS29   | #N/A   | #N/A   | #N/A   | #N/A   | #N/A   | #N/A       |
| RRM2    | 0.481  | 0.348  | 0.207  | 0.341  | -0.84  | 4.75E-46   |
| SDC2    | 0.275  | -0.05  | -0.423 | -0.335 | -0.891 | 1.76E-24   |
| TRA2B   | -0.035 | -0.148 | -0.276 | -0.351 | -0.8   | 8.71E-46   |
| SGK1    | 0.285  | 0.012  | -0.16  | -0.251 | -0.668 | 1.31E-17   |
| STIL    | -0.09  | -0.393 | -0.449 | -0.292 | -0.71  | 1.04E-23   |
| SKP2    | -0.319 | -0.282 | -0.331 | -0.302 | -0.812 | 1.06E-18   |
| SLC1A1  | 0.069  | -0.149 | -0.377 | -0.226 | -0.603 | 1.24E-08   |
| SLC1A5  | 0.271  | -0.11  | -0.375 | -0.173 | -0.635 | 2.4E-14    |
| SNCA    | 0.028  | -0.162 | -0.281 | -0.138 | -0.969 | 2.92E-47   |
| SNRPA1  | -0.065 | 0.094  | 0.037  | -0.086 | -0.719 | 7.97E-29   |
| SNRPG   | -0.211 | 0.108  | 0.085  | -0.434 | -0.575 | 0.00828    |
| SPAG4   | -0.089 | -0.011 | 0.01   | -0.373 | -0.698 | 7.51E-08   |
| STAC    | #N/A   | #N/A   | #N/A   | #N/A   | #N/A   | #N/A       |
| HSPA13  | 0.17   | -0.027 | -0.292 | -0.264 | -0.638 | 1.01E-30   |
| STX1A   | -0.077 | -0.353 | -0.145 | -0.539 | -0.85  | 1.78E-15   |
| SUV39H1 | -0.119 | -0.24  | -0.398 | -0.133 | -0.825 | 1.59E-22   |
| TAGLN   | 0.268  | 0.042  | 0.149  | -0.09  | -1.029 | 1.11E-17   |
| TCF7    | 0.332  | 0.071  | -0.457 | -0.45  | -0.69  | 2.21E-07   |
| TFAP4   | -0.337 | -0.35  | -0.229 | 0.081  | -0.891 | 1.27E-09   |
| TGFBR3  | -0.024 | -0.12  | -0.261 | -0.265 | -0.864 | 4.09E-25   |
| THBS1   | 0.212  | 0.033  | -0.255 | -0.194 | -0.64  | 1.83E-18   |
| TLR4    | 0.157  | -0.181 | -0.468 | -0.378 | -0.612 | 1.72E-23   |
| TMPO    | -0.03  | -0.304 | -0.429 | -0.068 | -0.865 | 1.73E-35   |
| TOP3A   | -0.058 | -0.051 | -0.215 | -0.303 | -0.626 | 7.74E-19   |
| TXNRD1  | 0.378  | 0.149  | -0.216 | -0.095 | -0.664 | 1.17E-17   |
| UPP1    | -0.237 | -0.014 | 0.033  | -0.152 | -0.599 | 3.18E-18   |
| USP1    | 0.462  | 0.05   | -0.223 | -0.058 | -0.837 | 3.33E-83   |
| ZFP36   | -0.229 | 0.228  | -0.301 | -0.394 | -0.81  | 2.89E-17   |
| ZNF18   | -0.39  | -0.011 | -0.178 | -0.499 | -0.872 | 3.8E-12    |
| ZBTB25  | -0.53  | 0.081  | 0.176  | -0.406 | -0.6   | 9.42E-12   |
| ALMS1   | -0.047 | 0.091  | -0.067 | -0.251 | -0.734 | 1.39E-13   |
| MALL    | 0.395  | -0.206 | -0.424 | -0.171 | -0.635 | 6.06E-21   |
| HSD17B8 | -0.226 | 0.035  | -0.111 | -0.374 | -0.747 | 0.000785   |
| YEATS4  | -0.159 | -0.152 | -0.129 | -0.337 | -0.723 | 0.00000768 |

|           |        |        |        |        |        |           |
|-----------|--------|--------|--------|--------|--------|-----------|
| SLC7A5    | -0.155 | -0.339 | 0.023  | 0.008  | -0.643 | 8.47E-12  |
| CHAF1B    | 0.553  | 0.225  | -0.276 | -0.371 | -0.819 | 3.39E-42  |
| HIST2H2AC | #N/A   | #N/A   | #N/A   | #N/A   | #N/A   | #N/A      |
| HIRIP3    | 0.058  | -0.002 | -0.032 | 0.248  | -0.794 | 1.02E-16  |
| RGS5      | 0.083  | -0.09  | -0.165 | -0.097 | -0.863 | 4.71E-08  |
| FCN3      | 0.308  | -0.031 | -0.264 | 0.109  | -0.763 | 1.06E-08  |
| PLPP1     | 0.27   | 0.177  | -0.091 | -0.045 | -0.621 | 2.07E-15  |
| STC2      | -0.192 | -0.235 | 0.001  | 0.203  | -0.725 | 9.67E-38  |
| JRK       | -0.557 | -0.195 | -0.074 | -0.543 | -0.763 | 1.96E-20  |
| FPGT      | -0.515 | -0.092 | -0.066 | -0.193 | -0.684 | 2.61E-10  |
| TNFRSF11A | 0.151  | -0.005 | -0.228 | -0.326 | -1.091 | 1.33E-30  |
| IL18R1    | 0.281  | 0.206  | -0.164 | -0.582 | -0.603 | 1.99E-20  |
| SLC5A6    | -0.172 | -0.183 | -0.271 | -0.485 | -0.862 | 1.11E-51  |
| TIMELESS  | 0.006  | 0.037  | -0.07  | -0.116 | -0.819 | 3.89E-54  |
| SNORD73A  | -0.213 | 0.28   | 0.206  | -0.532 | -0.65  | 0.0000698 |
| RRP9      | 0.164  | -0.155 | -0.361 | -0.081 | -0.614 | 1.02E-09  |
| EBAG9     | -0.031 | -0.004 | 0.037  | -0.048 | -0.752 | 1.78E-17  |
| STK17B    | -0.041 | -0.438 | -0.676 | -0.506 | -1.057 | 4.67E-39  |
| SLC9A3R2  | 0.371  | -0.15  | -0.443 | -0.413 | -0.862 | 2.29E-57  |
| STOML1    | -0.242 | -0.179 | -0.15  | -0.057 | -0.967 | 1.59E-25  |
| ATP6V1G1  | -0.168 | -0.088 | -0.161 | -0.542 | -0.711 | 2.01E-08  |
| MTRF1     | -0.564 | 0.044  | 0.048  | -0.347 | -0.654 | 2.04E-08  |
| TTLL4     | -0.485 | -0.233 | -0.159 | -0.432 | -0.653 | 1.44E-28  |
| KNTC1     | -0.269 | 0.153  | 0.057  | -0.28  | -0.871 | 2.32E-66  |
| CCP110    | 0.032  | 0.054  | -0.055 | -0.117 | -0.611 | 3.48E-22  |
| KIAA0513  | 0.147  | 0.155  | -0.052 | -0.008 | -0.773 | 2.59E-09  |
| DNAJC6    | 0.476  | -0.075 | -0.248 | -0.349 | -0.731 | 3.93E-17  |
| NUAK1     | 0.228  | 0.112  | -0.33  | -0.491 | -0.658 | 4.3E-33   |
| TELO2     | -0.088 | -0.051 | -0.24  | -0.548 | -0.674 | 4.98E-17  |
| DENND4B   | -0.418 | -0.193 | -0.047 | -0.48  | -0.618 | 2.63E-21  |
| DCLRE1A   | -0.301 | -0.235 | -0.195 | -0.113 | -0.774 | 4.49E-18  |
| RBX1      | -0.329 | -0.173 | -0.148 | -0.473 | -0.629 | 0.000032  |
| HDAC6     | -0.185 | 0.072  | 0.207  | -0.041 | -0.596 | 1.46E-21  |
| CHAF1A    | 0.453  | 0.004  | -0.464 | -0.548 | -0.718 | 2.76E-45  |
| ABCB6     | -0.359 | 0.263  | 0.276  | 0.205  | -0.934 | 4.29E-23  |
| NR1H3     | -0.371 | -0.18  | 0.13   | 0.037  | -0.731 | 0.0000671 |
| COX17     | -0.202 | -0.093 | -0.012 | -0.541 | -0.789 | 1.47E-08  |
| IL18BP    | -0.086 | 0.037  | -0.003 | -0.415 | -0.64  | 4.19E-18  |

|          |        |        |        |        |        |            |
|----------|--------|--------|--------|--------|--------|------------|
| TSPAN2   | -0.137 | 0.109  | 0.02   | -0.105 | -1.071 | 5.14E-14   |
| FRY      | -0.451 | -0.28  | -0.328 | -0.228 | -0.603 | 2.83E-14   |
| FAM13A   | -0.566 | -0.006 | -0.055 | -0.297 | -0.695 | 2.98E-14   |
| LPCAT3   | 0.079  | 0.123  | -0.012 | 0.191  | -0.612 | 9.13E-19   |
| RNF41    | -0.048 | -0.01  | -0.306 | -0.261 | -0.926 | 9.63E-51   |
| PRMT3    | -0.119 | -0.148 | -0.039 | 0.109  | -0.591 | 2.38E-11   |
| MPHOSPH9 | -0.362 | -0.231 | -0.094 | -0.211 | -0.724 | 2.11E-21   |
| FLOT1    | 0.105  | -0.185 | -0.282 | -0.086 | -0.617 | 2.05E-23   |
| DDX39A   | -0.067 | -0.172 | -0.265 | -0.243 | -0.716 | 1.61E-35   |
| SLC35B1  | 0.155  | 0.031  | -0.126 | -0.132 | -0.9   | 1.02E-82   |
| DLEU1    | -0.315 | -0.323 | -0.3   | -0.351 | -0.831 | 0.00000137 |
| APBB3    | -0.206 | 0.278  | 0.426  | -0.408 | -0.622 | 9.86E-12   |
| TCIRG1   | -0.264 | 0.146  | 0.046  | -0.486 | -0.606 | 8.28E-18   |
| ANAPC10  | -0.143 | -0.03  | -0.012 | -0.279 | -0.759 | 5.15E-07   |
| EMG1     | 0.143  | -0.001 | 0.044  | 0.019  | -0.686 | 6.74E-29   |
| TACC3    | -0.378 | -0.644 | -0.525 | -0.318 | -0.699 | 3.66E-21   |
| NOP56    | -0.272 | -0.183 | -0.225 | -0.555 | -0.906 | 1.2E-54    |
| SIVA1    | -0.312 | -0.194 | -0.24  | -0.517 | -0.775 | 4.02E-11   |
| SPAG5    | -0.351 | -0.506 | -0.489 | -0.255 | -0.655 | 1.26E-17   |
| TAF6L    | -0.116 | -0.073 | -0.229 | -0.252 | -0.63  | 2.47E-09   |
| POSTN    | 0.212  | 0.188  | -0.047 | 0.307  | -1.011 | 3.5E-15    |
| POLD3    | 0.195  | 0.124  | -0.097 | -0.326 | -1.068 | 1.56E-83   |
| PLK4     | -0.164 | -0.31  | -0.24  | -0.328 | -0.873 | 1.25E-22   |
| RAI2     | 0.502  | 0.022  | -0.307 | -0.325 | -0.744 | 2.75E-21   |
| ILVBL    | -0.116 | -0.121 | -0.295 | -0.141 | -0.721 | 3.88E-21   |
| STON1    | -0.354 | -0.006 | -0.155 | -0.096 | -0.772 | 4.89E-09   |
| CYB561D2 | 0.001  | -0.151 | -0.108 | 0.006  | -0.694 | 7.15E-19   |
| ZWINT    | -0.02  | 0.035  | -0.062 | -0.099 | -1.051 | 3.36E-93   |
| KAT7     | 0.126  | -0.079 | -0.334 | -0.224 | -0.8   | 1.91E-21   |
| DMC1     | 0.095  | 0.05   | -0.119 | -0.179 | -0.695 | 0.00153    |
| FICD     | -0.047 | 0.094  | -0.277 | -0.431 | -0.819 | 3.91E-20   |
| LSM6     | -0.213 | -0.21  | -0.101 | -0.381 | -0.818 | 6.06E-07   |
| PNKP     | -0.363 | -0.081 | 0.003  | -0.523 | -0.66  | 2.54E-15   |
| OIP5     | -0.511 | -0.642 | -0.299 | -0.11  | -0.59  | 0.0000484  |
| EXOSC8   | -0.199 | -0.132 | -0.218 | -0.353 | -0.908 | 6.42E-26   |
| BTBD3    | 0.236  | 0.021  | -0.344 | -0.352 | -0.804 | 4.13E-35   |
| DKK1     | 0.409  | 0.302  | -0.019 | 0.051  | -0.889 | 2.38E-55   |
| PAXIP1   | 0.17   | 0.054  | -0.113 | -0.413 | -0.636 | 1.62E-33   |

|         |        |        |        |        |        |           |
|---------|--------|--------|--------|--------|--------|-----------|
| CAMTA2  | -0.373 | -0.044 | 0.104  | -0.249 | -0.601 | 3.45E-30  |
| SULF1   | -0.15  | 0.033  | -0.016 | 0.324  | -1.044 | 1.76E-23  |
| SYNE2   | -0.225 | 0.147  | -0.187 | -0.296 | -0.966 | 1.28E-19  |
| DNAJC9  | 0.279  | 0.073  | -0.148 | -0.178 | -0.727 | 1.61E-74  |
| NCAPH   | 0.006  | -0.315 | -0.394 | 0.085  | -0.597 | 2.99E-09  |
| EXOSC2  | -0.071 | -0.137 | -0.223 | -0.231 | -0.606 | 5.93E-13  |
| ITGB3BP | -0.452 | 0.035  | 0.159  | -0.427 | -0.822 | 1.78E-07  |
| SLC44A1 | 0.311  | 0.005  | -0.259 | -0.036 | -0.656 | 6.74E-45  |
| ABCA6   | -0.239 | 0.101  | 0.069  | -0.253 | -0.664 | 2.91E-19  |
| PDSS1   | 0.15   | 0.009  | -0.242 | -0.351 | -0.773 | 2.14E-16  |
| SSBP2   | -0.205 | -0.44  | -0.573 | -0.537 | -1.062 | 3.2E-11   |
| LSM5    | -0.517 | -0.263 | -0.156 | -0.564 | -0.594 | 0.000191  |
| SDF2L1  | -0.041 | -0.304 | -0.4   | -0.368 | -0.989 | 2.68E-26  |
| IL17RA  | 0.134  | -0.186 | -0.255 | -0.257 | -0.581 | 7.82E-18  |
| CLDN15  | -0.507 | -0.035 | 0.408  | -0.566 | -0.745 | 9.81E-22  |
| RHBDD3  | -0.165 | 0.076  | -0.184 | -0.344 | -0.775 | 8.24E-19  |
| ASF1A   | -0.036 | -0.228 | -0.439 | -0.298 | -0.615 | 6.74E-14  |
| MPC2    | -0.154 | -0.067 | -0.163 | -0.37  | -0.598 | 9.16E-10  |
| ZNF473  | -0.566 | -0.103 | -0.437 | -0.574 | -0.713 | 1.66E-14  |
| ANAPC15 | -0.012 | -0.025 | -0.131 | -0.212 | -0.59  | 4.85E-20  |
| ACOT11  | 0.536  | -0.113 | -0.307 | -0.139 | -0.657 | 9.22E-20  |
| FBXW4P1 | 0.23   | -0.031 | -0.311 | -0.526 | -0.648 | 0.0000268 |
| FAM162A | -0.235 | -0.19  | -0.071 | -0.269 | -0.584 | 0.000311  |
| TIMM8B  | -0.31  | -0.238 | -0.101 | -0.418 | -0.609 | 0.0000637 |
| SNORD60 | 0.204  | 0.301  | 0.161  | -0.401 | -0.887 | 0.0000793 |
| TRMT2A  | -0.351 | 0.101  | -0.003 | -0.326 | -0.692 | 1.17E-26  |
| MTBP    | -0.16  | -0.12  | -0.266 | -0.266 | -0.661 | 2.21E-08  |
| CIDEB   | 0.136  | -0.199 | -0.426 | -0.454 | -0.778 | 0.00745   |
| SULT1B1 | -0.058 | -0.026 | -0.08  | 0.071  | -0.979 | 2.41E-87  |
| TMEM97  | 0.172  | -0.113 | -0.48  | -0.52  | -0.649 | 7.88E-46  |
| TRIB2   | 0.129  | -0.089 | -0.243 | -0.078 | -0.675 | 1.65E-11  |
| MRPS28  | -0.018 | -0.175 | -0.249 | -0.297 | -0.725 | 6.63E-13  |
| MAGEH1  | 0.153  | -0.101 | -0.293 | -0.095 | -0.649 | 2.89E-21  |
| ASTE1   | 0.22   | 0.077  | -0.227 | -0.133 | -0.62  | 3.87E-10  |
| MRPL13  | -0.177 | -0.072 | -0.024 | -0.254 | -0.586 | 0.0000381 |
| ATAD2   | 0.436  | 0.068  | -0.403 | -0.426 | -0.712 | 1.19E-35  |
| NDUFAF4 | -0.117 | -0.218 | -0.284 | -0.377 | -0.655 | 1.44E-07  |
| TIMM21  | -0.04  | -0.011 | -0.046 | -0.106 | -0.616 | 9.89E-18  |

|         |        |        |        |        |        |            |
|---------|--------|--------|--------|--------|--------|------------|
| TMEM208 | -0.073 | -0.181 | -0.228 | -0.29  | -0.619 | 7.15E-10   |
| N6AMT1  | -0.468 | -0.105 | 0.015  | -0.386 | -0.719 | 1.79E-14   |
| NCAPH2  | 0.168  | 0.123  | -0.031 | -0.157 | -0.885 | 4.97E-52   |
| ALG5    | -0.134 | -0.179 | -0.172 | -0.353 | -0.802 | 8.3E-11    |
| PSMC3IP | 0.288  | 0.108  | -0.188 | -0.582 | -0.825 | 1.88E-40   |
| GMPPB   | 0.096  | -0.002 | 0.017  | 0      | -0.608 | 7.96E-24   |
| ALG6    | -0.122 | 0.046  | 0.045  | 0.081  | -0.598 | 1.12E-18   |
| DONSON  | 0.179  | 0.171  | -0.054 | -0.11  | -0.676 | 1.37E-41   |
| SLC2A8  | 0.047  | -0.188 | -0.383 | -0.482 | -0.772 | 2.87E-25   |
| PILRA   | -0.547 | 0.099  | 0.33   | -0.511 | -0.553 | 0.0000681  |
| CXXC1   | -0.194 | -0.112 | -0.155 | -0.317 | -0.651 | 8.08E-22   |
| NT5C    | -0.016 | 0.071  | -0.303 | -0.353 | -0.785 | 1.06E-11   |
| ZNRD1   | -0.445 | -0.111 | -0.089 | -0.28  | -0.67  | 1.49E-08   |
| MTERF3  | -0.285 | -0.121 | -0.292 | -0.306 | -0.596 | 2.82E-13   |
| TPRKB   | -0.434 | -0.141 | -0.113 | -0.49  | -0.794 | 0.00000466 |
| MED31   | -0.029 | 0.11   | -0.013 | -0.531 | -0.929 | 4.77E-09   |
| RRP15   | -0.209 | -0.047 | -0.097 | -0.172 | -0.835 | 9.43E-33   |
| MRPS18C | -0.21  | -0.057 | 0.044  | -0.254 | -0.588 | 0.0000639  |
| DERA    | 0.075  | 0.06   | -0.158 | -0.26  | -0.743 | 5.4E-33    |
| TUBE1   | -0.564 | -0.229 | -0.008 | -0.348 | -0.703 | 2.09E-08   |
| HSPA14  | 0.01   | 0.001  | -0.203 | -0.464 | -0.803 | 3.12E-10   |
| CKLF    | -0.482 | -0.335 | -0.165 | -0.555 | -0.663 | 0.0000185  |
| NUSAP1  | -0.384 | -0.357 | -0.372 | -0.147 | -0.588 | 8.57E-18   |
| ANKRD39 | -0.066 | -0.145 | -0.234 | -0.187 | -0.661 | 0.00000178 |
| COX16   | -0.206 | -0.156 | -0.081 | -0.477 | -0.57  | 0.000273   |
| ANKMY1  | -0.205 | -0.223 | -0.097 | -0.472 | -0.875 | 3.72E-14   |
| CEND1   | -0.034 | -0.168 | -0.208 | 0.084  | -0.639 | 0.0000879  |
| THEM6   | 0.225  | -0.298 | -0.502 | -0.261 | -0.647 | 6.86E-17   |
| POP5    | -0.252 | -0.128 | -0.201 | -0.235 | -0.946 | 2.25E-21   |
| POMP    | -0.096 | -0.092 | -0.098 | -0.31  | -0.673 | 2.74E-07   |
| NOP16   | 0.02   | -0.142 | -0.306 | -0.161 | -0.614 | 7.28E-20   |
| NCKIPSD | -0.304 | -0.059 | -0.069 | -0.16  | -0.581 | 0.00000014 |
| JKAMP   | -0.207 | -0.222 | -0.236 | -0.453 | -0.66  | 1.02E-07   |
| PHF7    | -0.457 | 0.066  | 0.235  | 0.168  | -0.69  | 2.67E-10   |
| MTFP1   | -0.17  | -0.162 | -0.111 | -0.08  | -0.61  | 0.00000106 |
| SRRT    | 0.108  | -0.069 | -0.164 | -0.385 | -0.6   | 1.76E-37   |
| PPIL1   | -0.032 | -0.247 | -0.167 | -0.09  | -0.653 | 4.14E-13   |
| MPC1    | -0.304 | -0.165 | -0.158 | -0.494 | -0.837 | 3.12E-10   |

|          |        |        |        |        |        |            |
|----------|--------|--------|--------|--------|--------|------------|
| HSPB11   | -0.374 | 0.008  | 0.005  | -0.493 | -0.645 | 0.00000279 |
| POLR3K   | -0.22  | -0.305 | -0.479 | -0.49  | -0.704 | 1.34E-17   |
| PPIL3    | -0.18  | -0.198 | -0.016 | -0.15  | -0.671 | 0.00000524 |
| MIS18A   | -0.095 | -0.176 | -0.32  | -0.115 | -0.606 | 5.04E-11   |
| CYCS     | 0.025  | 0.001  | -0.01  | -0.273 | -0.694 | 2.03E-14   |
| GDAP1    | 0.504  | 0.412  | 0.148  | 0.145  | -0.807 | 0.00000199 |
| SLC38A2  | 0.201  | -0.037 | -0.263 | -0.435 | -0.795 | 3.5E-24    |
| ASNSD1   | -0.129 | -0.034 | -0.12  | -0.336 | -0.596 | 4.88E-07   |
| NDFIP2   | -0.146 | -0.115 | -0.111 | -0.23  | -0.635 | 0.0000987  |
| AHI1     | -0.165 | 0.061  | 0.054  | -0.364 | -0.746 | 8.4E-17    |
| ZCCHC10  | -0.394 | -0.186 | -0.143 | -0.509 | -0.616 | 0.00000897 |
| ERCC6L   | 0.051  | -0.252 | -0.292 | 0.11   | -0.621 | 2.37E-10   |
| ANKRD49  | -0.292 | 0.099  | 0.043  | -0.465 | -0.678 | 2.13E-10   |
| MTMR10   | -0.234 | 0.049  | -0.201 | -0.403 | -1.054 | 6.34E-55   |
| SEMA4C   | -0.572 | -0.055 | -0.489 | -0.584 | -0.835 | 8.82E-23   |
| C1orf27  | -0.073 | 0.076  | -0.076 | -0.426 | -0.604 | 1.53E-09   |
| TIPIN    | 0.266  | 0.014  | -0.34  | -0.488 | -1.044 | 3.4E-44    |
| C1orf159 | -0.336 | 0.04   | -0.085 | -0.479 | -0.634 | 3.63E-11   |
| MAGOHB   | -0.211 | -0.079 | -0.119 | -0.453 | -0.888 | 2.04E-11   |
| FIGN     | -0.479 | -0.424 | -0.372 | -0.35  | -0.737 | 6.07E-12   |
| MSTO1    | -0.129 | -0.175 | -0.087 | -0.186 | -0.674 | 1.31E-09   |
| CENPQ    | 0.016  | 0.067  | -0.305 | -0.465 | -0.786 | 2.27E-11   |
| LINS1    | -0.068 | 0.207  | -0.074 | -0.51  | -0.752 | 1.76E-20   |
| FANCI    | 0.084  | 0.21   | 0.135  | 0.229  | -0.602 | 3.31E-35   |
| LRRC1    | 0.306  | 0.111  | -0.385 | -0.487 | -0.906 | 7.91E-30   |
| RNF121   | 0.02   | -0.098 | -0.298 | -0.361 | -1.091 | 1.98E-79   |
| MNS1     | -0.066 | -0.088 | -0.176 | 0.131  | -0.941 | 0.000154   |
| ZNF823   | -0.262 | 0.137  | -0.146 | -0.342 | -0.599 | 0.0000165  |
| FOXRED1  | -0.045 | -0.005 | -0.061 | -0.211 | -0.681 | 6.01E-19   |
| SYBU     | 0.005  | -0.237 | -0.429 | -0.471 | -0.807 | 0.00000147 |
| LIMS2    | 0.11   | -0.183 | -0.152 | -0.162 | -0.837 | 3.91E-34   |
| TRMU     | -0.226 | -0.015 | -0.135 | -0.405 | -0.602 | 1.78E-13   |
| CEP72    | -0.249 | 0.062  | -0.169 | -0.323 | -0.922 | 2.02E-10   |
| SPATA7   | -0.476 | 0.183  | 0.009  | -0.224 | -0.713 | 2.5E-23    |
| CENPJ    | -0.146 | -0.027 | -0.126 | -0.572 | -0.755 | 2.46E-19   |
| PBK      | -0.401 | -0.532 | -0.512 | -0.236 | -0.891 | 1.31E-27   |
| NXT2     | 0.067  | 0.112  | -0.063 | -0.152 | -0.658 | 3.56E-07   |
| GPCPD1   | 0.009  | 0.007  | -0.054 | -0.342 | -0.742 | 7.6E-17    |



|          |        |        |        |        |        |            |
|----------|--------|--------|--------|--------|--------|------------|
| PPAN     | -0.286 | -0.037 | -0.059 | -0.408 | -0.608 | 0.0000121  |
| PANX2    | 0.001  | 0.098  | -0.053 | -0.067 | -0.758 | 7.67E-07   |
| SEMA3G   | 0.457  | -0.114 | -0.217 | -0.304 | -0.581 | 5.67E-09   |
| DUS3L    | -0.006 | -0.048 | -0.119 | -0.368 | -0.628 | 8.39E-13   |
| SMCO4    | 0.149  | -0.181 | -0.386 | -0.478 | -0.589 | 1.85E-09   |
| SDR39U1  | -0.398 | 0.062  | 0.063  | -0.324 | -0.577 | 6E-15      |
| RGL3     | -0.328 | 0.071  | 0.471  | -0.45  | -0.587 | 1.21E-10   |
| PHTF2    | -0.121 | -0.064 | -0.322 | -0.5   | -0.727 | 9.22E-35   |
| DOLPP1   | -0.091 | -0.016 | -0.252 | -0.224 | -0.876 | 1.83E-27   |
| C3orf14  | -0.267 | 0.019  | 0.058  | -0.292 | -0.659 | 0.00000273 |
| STAMBPL1 | 0.302  | -0.116 | 0.469  | 0.547  | -0.599 | 8.1E-08    |
| CEP126   | -0.066 | -0.14  | -0.067 | -0.234 | -0.72  | 0.000026   |
| PREX1    | 0.345  | -0.273 | -0.469 | -0.25  | -0.686 | 8.78E-19   |
| STIM2    | 0.002  | -0.225 | -0.248 | -0.259 | -0.663 | 1.29E-16   |
| UVSSA    | -0.367 | 0.023  | 0.245  | -0.445 | -0.702 | 8.27E-19   |
| DDX55    | -0.234 | -0.059 | -0.078 | -0.477 | -0.653 | 4.39E-14   |
| LSM2     | -0.281 | -0.242 | -0.086 | -0.337 | -0.836 | 1.04E-08   |
| SRPRB    | 0.149  | -0.157 | -0.249 | -0.24  | -0.797 | 4.26E-61   |
| PCTP     | 0.112  | -0.21  | -0.528 | -0.497 | -1.004 | 8.65E-22   |
| ZNF77    | -0.236 | -0.131 | -0.247 | -0.511 | -0.689 | 0.000182   |
| NIF3L1   | -0.238 | -0.397 | -0.112 | 0.075  | -0.718 | 4.79E-15   |
| SCOC     | -0.21  | -0.144 | -0.085 | -0.368 | -0.58  | 0.000167   |
| NECAB3   | -0.138 | 0.008  | -0.001 | -0.542 | -0.65  | 5.17E-17   |
| FKBPL    | -0.344 | 0.002  | -0.162 | 0.167  | -0.627 | 5.48E-07   |
| CLSPN    | 0.572  | 0.267  | -0.054 | -0.213 | -0.579 | 9.35E-38   |
| FIGNL1   | -0.127 | 0.023  | -0.113 | -0.363 | -0.64  | 2.59E-35   |
| CENPK    | -0.386 | 0.001  | 0.024  | -0.225 | -0.669 | 2.82E-14   |
| NCAPG    | -0.272 | -0.472 | -0.527 | -0.167 | -0.776 | 1.15E-38   |
| TOR3A    | -0.093 | -0.085 | -0.188 | -0.175 | -0.722 | 4.7E-19    |
| IKZF4    | 0.069  | -0.085 | 0.015  | -0.397 | -0.668 | 1.68E-08   |
| ATG3     | -0.097 | -0.136 | -0.207 | -0.241 | -0.68  | 3.43E-26   |
| METTL17  | -0.259 | -0.082 | -0.104 | -0.479 | -0.743 | 7.36E-13   |
| GIN3     | 0.522  | -0.1   | -0.488 | -0.332 | -0.939 | 6.16E-57   |
| NOL6     | 0.15   | -0.011 | -0.103 | -0.175 | -0.678 | 5.95E-23   |
| C17orf53 | -0.05  | -0.054 | -0.16  | -0.305 | -0.626 | 0.0000592  |
| AUNIP    | 0.238  | -0.288 | -0.612 | -0.425 | -0.808 | 5.77E-14   |
| CENPM    | -0.018 | -0.072 | -0.166 | 0.027  | -0.686 | 6.08E-09   |
| ELOVL6   | 0.104  | -0.287 | -0.361 | -0.247 | -0.87  | 1.25E-17   |

|          |        |        |        |        |        |            |
|----------|--------|--------|--------|--------|--------|------------|
| CHCHD7   | -0.148 | 0.052  | -0.132 | -0.426 | -0.674 | 1.08E-10   |
| DHRS11   | -0.076 | -0.112 | -0.326 | -0.466 | -0.591 | 0.0000056  |
| CENPO    | 0.039  | -0.297 | -0.427 | -0.331 | -0.595 | 7.86E-23   |
| CRELD2   | 0.17   | -0.085 | -0.263 | -0.032 | -0.691 | 8.17E-18   |
| THOC6    | -0.135 | -0.277 | 0.014  | -0.042 | -0.725 | 6.44E-18   |
| HAUS3    | -0.16  | 0.016  | -0.162 | -0.376 | -0.936 | 1.63E-27   |
| PAGR1    | -0.25  | -0.353 | -0.239 | -0.047 | -0.973 | 9.43E-11   |
| NAA16    | -0.054 | -0.055 | -0.134 | -0.579 | -0.586 | 2.75E-19   |
| GALNT14  | -0.098 | -0.11  | -0.34  | -0.035 | -0.83  | 0.00394    |
| C22orf46 | -0.547 | 0.011  | 0.469  | -0.207 | -0.804 | 1.25E-16   |
| CENPU    | 0.127  | 0.13   | -0.019 | -0.35  | -0.709 | 1.09E-17   |
| YRDC     | 0.205  | -0.155 | -0.342 | -0.39  | -0.595 | 2.91E-22   |
| SUV39H2  | -0.209 | -0.139 | -0.279 | -0.425 | -0.779 | 5.77E-16   |
| SH3D21   | -0.219 | 0.207  | 0.22   | -0.54  | -0.663 | 1.38E-13   |
| TEFM     | -0.387 | -0.185 | -0.085 | -0.259 | -0.629 | 0.00000679 |
| GEMIN7   | -0.355 | -0.216 | -0.108 | -0.344 | -0.604 | 0.00000341 |
| GEMIN6   | -0.49  | -0.282 | -0.136 | -0.209 | -0.778 | 2.09E-11   |
| CSPP1    | -0.384 | -0.222 | -0.238 | -0.504 | -0.589 | 0.00000563 |
| RPP21    | 0.003  | 0.091  | 0.045  | -0.117 | -0.63  | 0.000207   |
| L2HGDH   | 0.007  | 0.002  | 0.033  | -0.144 | -0.738 | 1.25E-11   |
| JADE1    | -0.478 | -0.296 | -0.237 | -0.202 | -0.882 | 8.06E-33   |
| RMI1     | -0.062 | -0.008 | -0.265 | -0.431 | -0.957 | 3.4E-43    |
| SEMA6D   | -0.516 | 0.779  | 0.337  | -0.125 | -0.603 | 1.16E-42   |
| ULBP2    | 0.365  | 0.223  | -0.049 | 0.062  | -0.767 | 1.27E-18   |
| SLC35G2  | -0.098 | 0.064  | -0.083 | -0.207 | -0.685 | 1.73E-12   |
| THAP7    | -0.254 | -0.155 | -0.316 | -0.176 | -0.876 | 1.5E-16    |
| ANP32E   | 0.151  | -0.093 | -0.239 | 0.08   | -0.757 | 6.02E-16   |
| SLC25A28 | -0.004 | 0.046  | -0.081 | -0.503 | -0.9   | 1.98E-22   |
| AKR1E2   | -0.541 | -0.264 | -0.26  | -0.493 | -0.623 | 0.00503    |
| BRIP1    | 0.281  | 0.33   | -0.149 | -0.477 | -0.777 | 1.94E-58   |
| SLC10A7  | 0.013  | 0.036  | -0.121 | -0.231 | -0.834 | 1.11E-27   |
| ATRIP    | -0.064 | 0.133  | -0.112 | -0.277 | -0.86  | 1.34E-32   |
| UTP15    | -0.061 | -0.053 | -0.324 | -0.279 | -0.625 | 6.58E-14   |
| FAM96A   | -0.33  | -0.103 | -0.069 | -0.37  | -0.622 | 0.00042    |
| POMK     | -0.245 | -0.338 | -0.361 | -0.389 | -0.65  | 0.00188    |
| TMEM126A | -0.273 | -0.147 | -0.113 | -0.466 | -0.754 | 0.00000135 |
| ZCCHC9   | -0.343 | -0.069 | -0.011 | -0.345 | -0.68  | 1.66E-10   |
| SLF1     | 0.047  | -0.224 | -0.513 | -0.48  | -0.81  | 5.69E-18   |

|           |        |        |        |        |        |            |
|-----------|--------|--------|--------|--------|--------|------------|
| EIF1AD    | 0.235  | 0.105  | -0.05  | -0.162 | -0.586 | 3.02E-39   |
| TMEM175   | -0.306 | 0.013  | 0.023  | -0.248 | -0.803 | 5.07E-21   |
| UQCC2     | -0.369 | -0.217 | -0.159 | -0.427 | -0.62  | 0.000192   |
| CMSS1     | -0.098 | -0.01  | 0.011  | -0.041 | -0.8   | 4.13E-17   |
| DOT1L     | 0.019  | 0.025  | -0.152 | -0.531 | -0.83  | 3.25E-44   |
| SLX4      | -0.573 | -0.117 | -0.083 | -0.311 | -1.023 | 7.02E-45   |
| KBTBD8    | 0.191  | 0.143  | 0.102  | -0.153 | -0.686 | 2E-12      |
| MCEE      | -0.189 | -0.059 | -0.038 | -0.401 | -0.812 | 0.00000195 |
| MPV17L2   | 0.118  | -0.125 | -0.188 | -0.069 | -0.632 | 3.41E-09   |
| DDX11L2   | -0.522 | 0.417  | 0.214  | -0.132 | -0.583 | 5.53E-13   |
| LINC00467 | -0.103 | -0.045 | 0.186  | 0.236  | -0.599 | 0.0000828  |
| GPAT3     | -0.065 | -0.133 | -0.08  | -0.118 | -0.758 | 0.0000328  |
| PPP1R15B  | 0.187  | 0.135  | -0.133 | -0.237 | -0.6   | 3.84E-37   |
| ALG10     | -0.425 | -0.09  | -0.146 | -0.169 | -0.805 | 3.02E-12   |
| TMEM128   | -0.109 | -0.043 | -0.077 | 0.002  | -0.646 | 2.03E-12   |
| LRRCC1    | 0.031  | -0.043 | -0.161 | -0.057 | -0.655 | 0.00000299 |
| DIXDC1    | 0.385  | -0.359 | -0.584 | -0.272 | -0.682 | 1.8E-22    |
| CEP295    | -0.465 | -0.108 | -0.162 | -0.394 | -0.592 | 1.22E-07   |
| KRT8P12   | -0.521 | -0.247 | -0.102 | -0.313 | -0.913 | 0.0000598  |
| KLHL13    | 0.426  | 0.014  | -0.341 | -0.148 | -0.573 | 0.00000005 |
| DCAF15    | -0.206 | -0.142 | -0.282 | -0.543 | -0.766 | 7.94E-19   |
| MED30     | -0.165 | -0.134 | -0.346 | -0.401 | -0.791 | 1.01E-09   |
| LYRM7     | -0.423 | -0.36  | -0.217 | -0.331 | -0.752 | 2.02E-17   |
| ZFAND2A   | 0.003  | 0.03   | -0.046 | -0.439 | -0.617 | 1.16E-10   |
| FAM104B   | -0.141 | -0.186 | -0.232 | -0.525 | -0.577 | 0.0000144  |
| CEP95     | -0.139 | 0.248  | 0.223  | -0.438 | -0.628 | 1.8E-22    |
| TRIM41    | -0.307 | -0.033 | 0.084  | -0.384 | -0.6   | 1.11E-16   |
| C12orf29  | -0.256 | -0.145 | -0.192 | -0.441 | -0.606 | 0.000025   |
| PLXNA4    | 0.059  | -0.201 | -0.551 | -0.071 | -1.044 | 4.28E-25   |
| LIN52     | -0.1   | -0.239 | -0.467 | -0.45  | -0.744 | 4.66E-18   |
| FDXACB1   | -0.169 | -0.157 | 0.163  | 0.296  | -0.835 | 1.18E-08   |
| TMEM88    | -0.557 | -0.635 | -0.585 | -0.505 | -0.627 | 0.000057   |
| LMBRD2    | -0.106 | 0.152  | -0.095 | -0.209 | -0.928 | 5.09E-38   |
| PRR29     | -0.191 | 0.054  | -0.041 | -0.002 | -0.812 | 0.0377     |
| MARS2     | -0.527 | -0.266 | -0.505 | -0.439 | -0.844 | 9.03E-09   |
| HAUS8     | -0.05  | -0.329 | -0.359 | -0.266 | -0.743 | 8.17E-13   |
| L3HYPDH   | -0.451 | -0.052 | 0.101  | -0.457 | -0.66  | 1.36E-07   |
| MTFR2     | -0.273 | -0.285 | -0.43  | -0.16  | -0.759 | 2.19E-10   |

|          |        |        |        |        |        |            |
|----------|--------|--------|--------|--------|--------|------------|
| CDCA5    | 0.181  | 0.002  | -0.125 | -0.185 | -0.731 | 3.89E-33   |
| TMEM106A | -0.39  | 0.078  | 0.16   | 0.066  | -0.598 | 2.71E-16   |
| TOE1     | -0.008 | -0.199 | -0.255 | -0.41  | -0.847 | 1.27E-17   |
| SLC25A25 | -0.21  | -0.102 | -0.267 | -0.372 | -0.726 | 1.57E-14   |
| STK11IP  | 0.115  | 0.088  | -0.003 | -0.177 | -0.753 | 6.68E-23   |
| TMEM123  | 0.311  | 0.1    | -0.176 | 0.055  | -0.844 | 7.48E-36   |
| TLCD1    | #N/A   | #N/A   | #N/A   | #N/A   | #N/A   | #N/A       |
| CNTROB   | -0.433 | -0.147 | -0.029 | -0.306 | -0.734 | 6.33E-28   |
| SFXN2    | -0.502 | -0.089 | 0.05   | -0.238 | -0.639 | 4.74E-14   |
| ZNF641   | -0.002 | 0.055  | -0.145 | -0.474 | -1.016 | 4.27E-26   |
| ALKBH2   | -0.412 | -0.379 | -0.327 | -0.367 | -0.661 | 0.00677    |
| LRR1     | -0.173 | -0.185 | -0.23  | -0.244 | -0.798 | 6.18E-10   |
| FOPNL    | -0.159 | -0.251 | -0.311 | -0.426 | -0.656 | 1.22E-10   |
| SPATA33  | -0.23  | -0.104 | -0.125 | -0.535 | -0.774 | 1.28E-17   |
| C17orf49 | 0.175  | 0.07   | 0.041  | 0.083  | -0.833 | 2.29E-07   |
| SHE      | 0.419  | -0.261 | -0.332 | -0.193 | -0.765 | 1.5E-37    |
| FCRLB    | 0.152  | -0.313 | -0.353 | -0.105 | -0.722 | 0.0229     |
| ARHGEF19 | 0.099  | 0.039  | -0.094 | -0.41  | -0.596 | 6.95E-10   |
| NUP35    | -0.182 | -0.414 | -0.583 | -0.324 | -0.868 | 1.4E-21    |
| C2orf76  | -0.318 | -0.064 | -0.197 | -0.542 | -0.676 | 0.000171   |
| TTC32    | 0.199  | 0.163  | -0.024 | -0.316 | -0.872 | 9.04E-08   |
| ZFAND2B  | -0.079 | -0.09  | -0.207 | -0.382 | -0.781 | 1E-21      |
| CCDC58   | -0.289 | -0.13  | -0.085 | -0.514 | -0.646 | 0.0000494  |
| C4orf33  | -0.276 | -0.184 | -0.27  | -0.451 | -0.815 | 0.00000172 |
| POC5     | -0.429 | -0.394 | -0.345 | -0.298 | -0.962 | 2.04E-12   |
| ZNF280B  | -0.483 | -0.057 | -0.377 | -0.479 | -0.907 | 6.17E-07   |
| HECTD2   | -0.054 | 0.118  | 0.003  | -0.539 | -0.747 | 7.55E-21   |
| MIPOL1   | 0.131  | -0.148 | -0.133 | -0.338 | -0.658 | 1.97E-22   |
| EME1     | -0.529 | -0.176 | -0.137 | -0.573 | -0.822 | 1.76E-11   |
| ZNF534   | -0.158 | -0.124 | -0.229 | -0.223 | -0.68  | 0.0142     |
| SPC24    | -0.48  | -0.35  | -0.103 | 0.079  | -0.668 | 2.95E-14   |
| DPY19L3  | -0.002 | 0.054  | -0.037 | -0.287 | -0.711 | 3.56E-28   |
| PQLC2L   | -0.029 | -0.272 | -0.355 | -0.206 | -0.657 | 0.0366     |
| NFXL1    | -0.105 | 0.161  | 0.078  | -0.302 | -0.704 | 5.86E-29   |
| MBLAC2   | -0.448 | -0.26  | -0.339 | -0.216 | -0.647 | 1.67E-07   |
| MARVELD2 | 0.373  | 0.367  | -0.13  | -0.207 | -0.595 | 2.02E-09   |
| RAET1L   | 0.256  | -0.138 | -0.322 | -0.184 | -0.881 | 0.00334    |
| CCDC167  | -0.133 | -0.144 | -0.027 | -0.227 | -0.616 | 4.95E-09   |

|           |        |        |        |        |        |            |
|-----------|--------|--------|--------|--------|--------|------------|
| KCTD7     | -0.237 | -0.011 | 0.039  | -0.402 | -0.619 | 1.48E-13   |
| FAM201A   | -0.219 | 0.024  | 0.27   | -0.139 | -0.644 | 0.0017     |
| SLC35G1   | 0.093  | 0.115  | -0.411 | -0.495 | -0.895 | 1.21E-10   |
| CLEC14A   | 0.124  | -0.277 | -0.589 | -0.172 | -0.754 | 2.03E-27   |
| PGBD4     | -0.385 | 0.034  | -0.106 | -0.492 | -0.8   | 4.68E-10   |
| ZNF114    | 0.144  | -0.209 | -0.365 | -0.45  | -0.996 | 0.00013    |
| SASS6     | -0.237 | 0.059  | -0.267 | -0.194 | -0.614 | 1.08E-09   |
| CCDC138   | -0.348 | -0.52  | -0.435 | -0.509 | -0.894 | 0.00000195 |
| THAP5     | -0.097 | 0.082  | -0.145 | -0.368 | -0.65  | 2.66E-19   |
| GIMAP7    | -0.414 | -0.168 | -0.436 | -0.073 | -0.777 | 9.28E-16   |
| BHLHA15   | 0.302  | -0.145 | -0.05  | 0.037  | -0.721 | 0.0318     |
| ZNF596    | -0.01  | 0.483  | 0.535  | -0.15  | -0.769 | 1.07E-14   |
| ALG14     | 0.077  | -0.102 | -0.117 | -0.201 | -0.743 | 5.49E-12   |
| TMEM201   | -0.209 | -0.285 | -0.467 | -0.577 | -1.031 | 4.2E-29    |
| KCTD6     | 0.034  | -0.025 | -0.112 | -0.431 | -0.643 | 0.0000674  |
| C4orf46   | 0.072  | -0.367 | -0.539 | -0.408 | -0.811 | 8.49E-46   |
| TMEM218   | -0.326 | -0.289 | -0.154 | -0.383 | -0.674 | 0.000214   |
| TPCN2     | -0.293 | 0.279  | 0.003  | -0.445 | -0.711 | 1.71E-26   |
| SKA1      | -0.001 | -0.218 | -0.249 | 0.039  | -0.785 | 1.89E-29   |
| SKA3      | -0.468 | -0.413 | -0.156 | -0.045 | -0.724 | 1.63E-21   |
| C6orf136  | -0.221 | -0.006 | -0.131 | -0.22  | -0.592 | 0.00000219 |
| MTURN     | 0.466  | 0.346  | 0.131  | -0.469 | -0.864 | 2.14E-24   |
| SEMA3D    | 0.041  | 0.042  | -0.263 | -0.199 | -1.06  | 4.22E-31   |
| GPATCH11  | 0.06   | 0.065  | -0.183 | -0.131 | -0.583 | 4.85E-17   |
| CERS6     | 0.242  | 0.071  | -0.231 | -0.165 | -0.71  | 2.09E-17   |
| BRWD3     | -0.349 | 0.15   | 0.16   | -0.352 | -0.602 | 2.83E-20   |
| ST6GALNAC | 0.006  | -0.116 | -0.278 | -0.322 | -0.662 | 1.68E-21   |
| MAGI3     | -0.327 | -0.149 | -0.455 | -0.453 | -0.671 | 1.22E-10   |
| NPHP4     | -0.039 | -0.211 | -0.137 | -0.419 | -0.69  | 1.46E-15   |
| FUOM      | -0.079 | -0.163 | -0.213 | -0.299 | -0.755 | 7.61E-15   |
| C14orf80  | -0.018 | -0.05  | -0.066 | -0.187 | -0.915 | 2.48E-24   |
| TSEN54    | -0.142 | -0.069 | -0.299 | -0.563 | -1.035 | 2.21E-36   |
| C3orf70   | 0.455  | 0.033  | -0.209 | -0.344 | -0.638 | 4.92E-10   |
| LINC00632 | -0.094 | -0.008 | -0.206 | -0.418 | -0.858 | 0.0132     |
| C1orf174  | -0.293 | -0.313 | -0.273 | -0.547 | -0.65  | 5.46E-14   |
| BEX5      | -0.242 | 0.028  | -0.034 | -0.202 | -0.672 | 0.000693   |
| KIF24     | 0.02   | 0.06   | -0.195 | -0.092 | -0.726 | 5.36E-10   |
| GNG5P2    | 0.018  | -0.238 | -0.199 | -0.341 | -0.584 | 2.81E-09   |

|           |        |        |        |        |        |            |
|-----------|--------|--------|--------|--------|--------|------------|
| CTU2      | 0.061  | -0.182 | -0.271 | -0.086 | -0.598 | 4.35E-12   |
| ZNF530    | 0.135  | -0.303 | -0.193 | -0.353 | -0.781 | 8.02E-07   |
| GEN1      | -0.275 | -0.186 | -0.19  | -0.535 | -0.67  | 2.26E-15   |
| RAET1G    | 0.19   | -0.045 | -0.258 | -0.097 | -0.726 | 0.0226     |
| WASH3P    | -0.47  | 0.153  | 0.244  | -0.572 | -0.734 | 4.83E-22   |
| C5orf34   | -0.528 | -0.125 | -0.346 | -0.166 | -0.776 | 8.56E-08   |
| RNF148    | 0.273  | 0.192  | -0.128 | -0.313 | -0.604 | 0.0362     |
| CLEC12B   | -0.318 | -0.217 | -0.165 | -0.374 | -0.761 | 0.00155    |
| ZNF324B   | -0.031 | 0.238  | -0.385 | -0.44  | -0.737 | 1.5E-13    |
| LYSMD1    | -0.098 | 0.235  | 0.041  | -0.389 | -0.716 | 7.55E-10   |
| LINC00493 | -0.35  | -0.281 | -0.131 | -0.436 | -0.6   | 0.00242    |
| SLC25A35  | -0.525 | -0.096 | -0.111 | -0.368 | -0.687 | 1.88E-09   |
| TOMM5     | -0.367 | -0.196 | -0.145 | -0.558 | -0.734 | 0.00000466 |
| CENPP     | -0.236 | 0.154  | 0.16   | 0.244  | -0.647 | 2.98E-20   |
| WHAMMP2   | -0.485 | -0.093 | -0.218 | -0.451 | -0.715 | 1.3E-08    |
| TYW1B     | -0.355 | -0.147 | -0.378 | -0.391 | -0.761 | 0.00627    |
| CISD2     | -0.064 | -0.136 | -0.161 | -0.396 | -0.815 | 1.06E-16   |
| CHAC2     | -0.483 | -0.186 | -0.255 | -0.527 | -0.89  | 4.33E-16   |
| DUXAP9    | 0.153  | 0.078  | -0.026 | -0.107 | -0.769 | 0.0234     |
| LARP4P    | -0.069 | -0.331 | -0.281 | -0.275 | -0.749 | 0.00104    |
| RPL26P30  | -0.061 | -0.107 | -0.033 | -0.286 | -0.592 | 0.00054    |
| WASH7P    | -0.35  | 0.078  | 0.041  | -0.529 | -0.704 | 1.23E-12   |
| SNORA20   | -0.082 | -0.088 | -0.257 | -0.524 | -0.885 | 0.0285     |
| HMGN2P5   | -0.05  | -0.177 | -0.06  | -0.052 | -0.799 | 4.01E-23   |
| D2HGDH    | -0.572 | -0.086 | -0.007 | -0.487 | -0.643 | 6.9E-13    |
| HMGB2P1   | -0.295 | -0.726 | -0.771 | -0.297 | -0.925 | 0.0000178  |
| SNHG9     | -0.25  | -0.213 | -0.051 | -0.426 | -0.975 | 1.73E-07   |
| KTN1-AS1  | -0.15  | -0.601 | -0.349 | -0.39  | -0.856 | 0.00095    |
| CCDC152   | 0.149  | -0.009 | -0.047 | 0.336  | -0.693 | 5.04E-07   |
| C11orf91  | 0.233  | 0.719  | 0.73   | -0.298 | -0.85  | 8.36E-19   |
| FAM27E3   | -0.385 | 0.06   | 0.12   | -0.065 | -0.768 | 0.000193   |
| ZNF587B   | -0.19  | 0.065  | -0.068 | -0.202 | -0.601 | 8.24E-07   |
| TNPO1P1   | -0.028 | -0.261 | -0.168 | -0.092 | -0.608 | 0.0000365  |
| COX20P1   | -0.326 | -0.217 | -0.113 | -0.332 | -0.661 | 0.00019    |
| MICA      | 0.167  | -0.057 | -0.214 | -0.356 | -0.921 | 9.8E-91    |
| ERVK3-1   | 0.079  | -0.033 | -0.301 | -0.504 | -0.626 | 1.15E-08   |
| MIR4512   | -0.409 | -0.458 | -0.067 | -0.337 | -0.756 | 0.0157     |
| MIR7161   | 0.085  | 0.166  | 0.171  | -0.061 | -0.705 | 0.027      |

|           |        |        |        |        |        |            |
|-----------|--------|--------|--------|--------|--------|------------|
| KPNA2     | -0.265 | -0.661 | -0.721 | 0.018  | 0.187  | 3.78E-20   |
| CBLN2     | -0.007 | 0.669  | 0.518  | 0.543  | -0.42  | 1.13E-31   |
| DLGAP5    | -0.492 | -0.965 | -1.025 | -0.297 | -0.153 | 4.46E-34   |
| FAM50B    | -0.451 | -0.764 | -0.116 | 0.513  | 0.356  | 3.24E-27   |
| ZNF737    | 0.619  | 0.816  | 0.678  | 0.719  | 0.849  | 0.0256     |
| KLHL3     | -0.369 | -0.601 | -0.168 | -0.172 | 0.122  | 0.0000231  |
| RACGAP1   | -0.562 | -0.862 | -0.751 | -0.19  | -0.543 | 2.3E-24    |
| ANLN      | -0.33  | -0.606 | -0.621 | -0.194 | -0.346 | 1.99E-17   |
| PRICKLE1  | 0.122  | -0.641 | -0.672 | -0.414 | -0.521 | 1.96E-08   |
| CD83      | 0.441  | 1.738  | 0.952  | -0.086 | 0.831  | 4.14E-15   |
| TNFAIP3   | 0.097  | 0.656  | 0.204  | -0.293 | 0.533  | 2.32E-24   |
| JAK3      | -0.161 | 0.71   | 0.891  | 0.303  | 0.518  | 1.87E-11   |
| ANKRA2    | 0.396  | 0.76   | 0.692  | 0.174  | 0.326  | 4.43E-12   |
| NDC80     | -0.505 | -0.85  | -0.606 | 0.003  | -0.522 | 1.19E-32   |
| KIF4B     | -0.135 | -0.686 | -0.498 | 0.057  | -0.239 | 0.000108   |
| SERINC5   | 0.209  | 0.612  | 0.349  | 0.03   | 0.503  | 1.27E-12   |
| TPX2      | -0.31  | -0.7   | -0.582 | -0.013 | -0.1   | 2.83E-13   |
| EIF4E3    | 0.442  | 0.649  | 0.606  | 0.645  | 0.475  | 0.00394    |
| CA13      | 0.548  | 0.614  | 0.469  | 0.288  | 0.382  | 0.0028     |
| PRICKLE4  | -0.37  | 0.663  | 0.892  | -0.084 | 0.177  | 2.75E-10   |
| LACC1     | 0.105  | 0.789  | 0.507  | -0.018 | 0.469  | 1.34E-11   |
| HIVEP1    | 0.564  | 0.825  | 0.501  | 0.224  | 0.283  | 2.1E-23    |
| EVI2B     | 0.048  | -0.951 | -0.827 | -0.152 | -0.247 | 2.09E-12   |
| VIP       | -0.049 | 0.786  | 1.26   | 0.29   | 0.451  | 6.69E-07   |
| HIST1H4H  | 0.05   | 0.715  | 0.708  | 0.625  | 0.632  | 0.0177     |
| KIF14     | -0.347 | -0.883 | -0.643 | -0.322 | -0.382 | 6.59E-25   |
| PCNA      | 0.474  | 0.599  | 0.35   | -0.004 | -0.305 | 9.01E-57   |
| LYL1      | 0.336  | -0.681 | -0.293 | 0.155  | -0.114 | 4.58E-33   |
| MAMDC4    | -0.266 | 0.773  | 1.037  | -0.068 | -0.283 | 3.18E-24   |
| CDKL5     | -0.287 | 0.713  | 0.432  | 0.401  | 0.41   | 5.8E-10    |
| MIR570    | 0.117  | 0.597  | 0.404  | -0.529 | -0.48  | 0.00000172 |
| ZBTB21    | 0.403  | 0.72   | 0.465  | 0.356  | 0.362  | 4.64E-19   |
| IL7R      | -0.084 | 0.726  | 0.134  | -0.198 | 0.027  | 6.91E-39   |
| PTTG2     | -0.42  | -0.756 | -0.521 | -0.499 | -0.028 | 0.000113   |
| PYY2      | -0.223 | 0.75   | 0.735  | -0.087 | 0.177  | 0.00116    |
| BIRC5     | -0.528 | -0.629 | -0.731 | -0.558 | -0.465 | 4.25E-29   |
| SEMA3B    | 0.325  | 0.699  | 1.031  | 0.161  | -0.174 | 2.16E-07   |
| ANKRD26P1 | -0.221 | 1.201  | 1.843  | 1.259  | 2.191  | 1.13E-28   |

|           |        |        |        |        |        |            |
|-----------|--------|--------|--------|--------|--------|------------|
| CKAP2     | -0.454 | -0.631 | -0.476 | -0.006 | -0.02  | 1.77E-21   |
| USP49     | 0.254  | 0.656  | 0.532  | -0.321 | -0.154 | 4.45E-19   |
| ZBTB12    | -0.597 | -0.649 | -0.079 | -0.156 | -0.171 | 0.0133     |
| ARL6IP1   | -0.483 | -0.86  | -1.032 | -0.546 | 0.143  | 8.12E-113  |
| ATG16L2   | -0.548 | 0.874  | 1.135  | 0.066  | 0.179  | 1.74E-28   |
| CCNB2     | -0.564 | -1.02  | -1.08  | -0.587 | -0.315 | 5.17E-53   |
| CDC25C    | -0.447 | -0.739 | -0.488 | 0.079  | -0.071 | 2.07E-11   |
| CDC25B    | -0.455 | -0.642 | -0.403 | -0.207 | -0.433 | 3.25E-19   |
| TMEM223   | -0.246 | -0.634 | -0.364 | -0.263 | -0.508 | 0.000026   |
| SLC45A3   | -0.011 | -0.621 | -0.067 | 0.323  | 0.395  | 5.31E-26   |
| PRR11     | -0.274 | -0.665 | -0.62  | -0.139 | 0.361  | 2.02E-36   |
| TRIAP1    | 0.342  | 0.581  | 0.613  | 0.401  | 0.415  | 3.11E-10   |
| FDFT1     | 0.44   | -0.235 | -0.618 | -0.497 | 0.134  | 4.43E-40   |
| NLRP1     | 0.066  | 0.58   | 0.713  | 0.264  | 0.313  | 3.7E-27    |
| FAM71F2   | 0.472  | 0.271  | 0.717  | -0.229 | 0.702  | 0.00107    |
| ZNF337    | -0.029 | 0.53   | 0.69   | -0.109 | 0.107  | 7.56E-18   |
| BLOC1S2   | 0.427  | 0.583  | 0.604  | 0.267  | 0.445  | 0.0000183  |
| MVK       | 0.05   | -0.357 | -0.591 | -0.396 | -0.03  | 2.25E-07   |
| GOLGA80   | -0.272 | -0.001 | 0.659  | -0.641 | -0.027 | 0.000327   |
| FAM26E    | -0.002 | -0.311 | -0.65  | -0.425 | -0.327 | 6.08E-19   |
| XAF1      | -0.38  | -0.134 | 0.588  | 0.037  | 0.485  | 8.39E-09   |
| PRC1      | -0.242 | -0.493 | -0.586 | -0.188 | -0.327 | 0.00000173 |
| FZD2      | -0.346 | -0.397 | -0.666 | 0.033  | 0.411  | 0.0000441  |
| KCNJ2-AS1 | 0.122  | 0.532  | 0.713  | 0.552  | 0.281  | 0.0182     |
| MIR6775   | 0.028  | 0.246  | 0.667  | -0.062 | -0.122 | 0.0334     |
| ADAMTS13  | -0.282 | 0.085  | 0.71   | 0.08   | 0.211  | 0.0000142  |
| CBWD3     | 0.098  | 0.063  | 0.735  | -0.229 | -0.182 | 0.0217     |
| FAM86HP   | -0.526 | 0.381  | 0.791  | 0.009  | 0.175  | 0.00000133 |
| DNAJC18   | 0.019  | 0.184  | 0.598  | -0.053 | 0.279  | 0.0000051  |
| SYNE3     | 0.489  | 0.092  | 0.642  | 0.31   | -0.158 | 5E-24      |
| CYP51A1   | 0.347  | -0.243 | -0.67  | -0.547 | -0.189 | 1.55E-43   |
| ESX1      | -0.069 | -0.494 | -0.676 | -0.252 | -0.187 | 0.000276   |
| C5orf63   | -0.044 | -0.081 | 0.674  | 0.047  | 0.623  | 0.00278    |
| CARF      | -0.294 | 0.125  | 0.599  | -0.007 | 0.025  | 0.00000147 |
| IZUMO4    | -0.285 | 0.265  | 0.647  | -0.096 | 0.115  | 0.00516    |
| SWT1      | 0.05   | 0.484  | 0.748  | 0.519  | 0.569  | 0.00000102 |
| GCKR      | -0.444 | 0.474  | 0.699  | 0.109  | -0.244 | 1.39E-26   |
| KLHL4     | 0.297  | -0.14  | -0.597 | -0.565 | 0.098  | 1.26E-22   |



|           |        |        |        |        |        |          |
|-----------|--------|--------|--------|--------|--------|----------|
| LYN       | 0.498  | -0.175 | -0.656 | -0.328 | -0.164 | 7.6E-32  |
| LPAR1     | -0.629 | 0.13   | 0.996  | 0.823  | 0.248  | 4.69E-13 |
| OSBPL6    | -0.284 | -0.481 | -0.597 | -0.472 | -0.171 | 5.25E-07 |
| RN7SL834P | -0.231 | 0.268  | 0.686  | -0.363 | -0.136 | 0.00363  |
| ZNF695    | -0.49  | -0.312 | -0.781 | -0.509 | -0.593 | 0.0328   |
| KIF20B    | -0.452 | -0.584 | -0.621 | -0.243 | -0.209 | 4.81E-15 |
| FAM95B1   | -0.098 | 0.279  | 0.648  | -0.456 | -0.294 | 0.00122  |
| RALGPS1   | -0.079 | 0.373  | 0.764  | 0.237  | 0.522  | 0.000277 |
| SQLE      | 0.314  | -0.437 | -0.735 | -0.559 | 0.162  | 2.29E-59 |
| PVT1      | -0.344 | 0.433  | 0.658  | 0.083  | 0.413  | 9.71E-14 |

| Name                                               | NCBI Entrez UniProt                                                                                                                                 |
|----------------------------------------------------|-----------------------------------------------------------------------------------------------------------------------------------------------------|
| Rho Guanine Nucleotide Exchange Factor             | Acts as guanine nucleotide exchange factor for Rho GTPase.                                                                                          |
| Cell Division Cycle Associated Protein 1           | This gene encodes a protein that acts as a regulator of chromosome structure during cell division.                                                  |
| SAM Domain, SH3 Domain A                           | SAMSN1 is a negative regulator of B-cell activation.                                                                                                |
| TBC1 Domain Family Member 2                        | Acts as GTPase-activating protein for Rho GTPase.                                                                                                   |
| Kinesin Family Member 2C                           | This gene encodes a protein that, in complex with KIF18B, constitutes the centromeric protein that plays a central role in chromosome segregation.  |
| Holliday Junction Recognition Protein              | Centromeric protein that plays a central role in chromosome segregation.                                                                            |
| Ras Association Domain Family Member 1             | This gene encodes a potential tumor suppressor. Acts as a negative regulator of Ras signaling.                                                      |
| Protoporphyrin Oxidase                             | This gene encodes a heme biosynthetic enzyme that catalyzes the 6-electron oxidation of protoporphyrin IX to heme.                                  |
| Exocyst Complex Component                          | The protein encoded by this gene is upregulated by various growth factors and is involved in the regulation of cell growth and differentiation.     |
| Double Homeobox 4 Like 50 (Pseudogene)             |                                                                                                                                                     |
| THAP Domain Containing 3                           | Component of a THAP1/THAP3-HCFC1 complex that is involved in the regulation of gene expression.                                                     |
| Papilin, Proteoglycan Like Sulfated Glycoprotein   |                                                                                                                                                     |
| Family With Sequence Similarity 221 Member A       |                                                                                                                                                     |
| Inositol Polyphosphate-4-Phosphatase               | INPP4B encodes a protein that catalyzes the hydrolysis of the 4-position of inositol polyphosphates.                                                |
| Sestrin 1                                          | This gene encodes a protein that functions as an intracellular leucine sensor and is involved in the regulation of cell growth and differentiation. |
| Vasohibin 1                                        | Tyrosine carboxypeptidase that removes the C-terminal tyrosine from tyrosine phosphorylated proteins.                                               |
| ABL Proto-Oncogene 2, Non-receptor Tyrosine Kinase | This gene encodes a non-receptor tyrosine-protein kinase that is involved in the regulation of cell growth and differentiation.                     |
| Cleavage Factor Polyribonucleotide Kinase          | This gene encodes a polynucleotide kinase that can phosphorylate RNA and DNA.                                                                       |
| CUB And Zona Pellucida Like Domains 1              | CUZD1 antiserum inhibits cell attachment and is involved in the regulation of cell growth and differentiation.                                      |
| Pim-3 Proto-Oncogene, Serine/Threonine Kinase      | The protein encoded by this gene is a proto-oncogene with serine/threonine kinase activity.                                                         |
| Synaptic Ras GTPase Activating Protein             | This gene encodes a major constituent of the PSD essential for the regulation of synaptic plasticity.                                               |
| Rho GTPase Activating Protein 1                    | RICS is a neuronal GTPase-activating protein (GAP) that is involved in the regulation of cell growth and differentiation.                           |
| Ferredoxin Reductase                               | This gene encodes a protein that serves as the first electron transfer protein in the mitochondrial electron transport chain.                       |
| Solute Carrier Family 7 Member 1                   | The protein encoded by this gene functions as a permease involved in the transport of various solutes across the cell membrane.                     |
| Lysosomal Trafficking Regulator 1                  | This gene encodes an adapter protein that regulates and/or functions in the trafficking of lysosomes.                                               |
| Zinc Finger And SCAN Domain Containing             | May be involved in transcriptional regulation.                                                                                                      |
| PICALM Interacting Mitotic Regulator               | During mitosis, may play a role in the coordination of chromosome segregation.                                                                      |
| Sestrin 2                                          | This gene encodes a protein that functions as an intracellular leucine sensor and is involved in the regulation of cell growth and differentiation. |
| Coiled-Coil Domain Containing 150                  |                                                                                                                                                     |
| MicroRNA 5047                                      | microRNAs (miRNAs) are short (20-24 nt) non-coding RNA molecules that regulate gene expression.                                                     |
| Zinc Finger Protein 862                            | May be involved in transcriptional regulation.                                                                                                      |
| Poly(A) Binding Protein Cytoplasmic 1              | This gene belongs to the polyadenylate-binding protein family and is involved in the regulation of mRNA stability and translation.                  |
| Leukotriene B4 Receptor 2                          | Low-affinity receptor for leukotrienes involved in the regulation of cell growth and differentiation.                                               |
| Choline Kinase Beta                                | Choline kinase has a key role in phospholipid metabolism and is involved in the regulation of cell growth and differentiation.                      |
| Heat Shock Protein Family A Class B Member 1       | This intronless gene (Microbial infection) is involved in the response to heat shock and is upregulated in case of rotavirus infection.             |
| MicroRNA 3064                                      | microRNAs (miRNAs) are short (20-24 nt) non-coding RNA molecules that regulate gene expression.                                                     |
| POU Class 2 Homeobox 2                             | The protein encoded by this gene is a transcription factor that specifically binds to DNA and regulates gene expression.                            |

Myelin Protein Zero This gene is Is an adhesion molecule necessary for r  
G2 And S-Phase Expressed 1The protein ε May be involved in p53-induced cell cycl  
Zinc Finger Protein 79 May be involved in transcriptional regula  
Denticleless E3 Ubiquitin Protein Ligase Hc Substrate-specific adapter of a DCX (DC  
Syntaphilin Syntaxin-1, s Inhibits SNARE complex formation by at  
Actin Alpha 2, Smooth Muscle This gene en Actins are highly conserved proteins tha  
Neurobeachin Like 1  
Leucine Rich Repeat Containi This gene is Synaptic adhesion protein. Regulates th  
Proline And Serine Rich 2  
Suppressor APC Domain Containing 2 Plays a role in planar mitotic spindle orie  
GAS6 Antisense RNA 1  
Zinc Finger Protein 485 May be involved in transcriptional regula  
Coiled-Coil Domain Containing 144B (Pseudogene)  
Solute Carrier Family 9 Memb The protein ε Involved in pH regulation to eliminate ac  
Sp6 Transcription Factor SP6 belongs Promotes cell proliferation.  
Coiled-Coil Domain Containing 68 Centriolar protein required for centriole s  
Heat Shock Protein Family A This intronles (Microbial infection) In case of rotavirus .  
Cyclin Dependent Kinase Inhi The protein ε May play a role in cell cycle regulation. I  
Cytoplasmic Polyadenylation Element Bind Sequence-specific RNA-binding protein  
Leucine Rich Repeat Containing 27  
Zinc Finger Protein 331 This gene en May be involved in transcriptional regula  
Rho GTPase Activating Prote This gene encodes a member of the Rho GTPase act  
Myeloid Zinc Finger 1 Binds to target promoter DNA and functi  
Fibroblast Growth Factor Rec This gene en Tyrosine-protein kinase that acts as cell-  
Zinc Finger Protein 365 This gene en Involved in the regulation of neurogenes  
Cyclin Dependent Kinase Inhi This gene en May be involved in p53/TP53 mediated i  
Cyclin Dependent Kinase Inhi This gene en Important regulator of cell cycle progres  
TNF Superfamily Member 9 The protein ε Cytokine that binds to TNFRSF9. Induce  
Cyclin Dependent Kinase Inhi This gene lie Interacts strongly with CDK4 and CDK6.  
MicroRNA 4784 microRNAs (miRNAs) are short (20-24 nt) non-coding  
Chromodomain Y Like 2  
Long Intergenic Non-Protein Coding RNA 476  
Coiled-Coil Serine Rich Protein 2 Microtubule-binding protein which might  
Rho GTPase Activating Prote This gene en May be involved in several stages of intr  
DBF4 Zinc Finger Regulatory subunit for CDC7 which activ  
Caspase Recruitment Domair The protein ε Inhibits NF-kappa-B activation. May part  
RUN And SH3 Domain Conta This gene encodes a RUN and SH3 domain containin  
Podocalyxin Like This gene en Involved in the regulation of both adhesi

## IQ Motif Containing GTPase Activating Protein 3

Von Willebrand Factor C And EGF Domain May be a regulatory element in the beta-Fibroblast Growth Factor 2 The protein  $\epsilon$  Acts as a ligand for FGFR1, FGFR2, FG

TNF Alpha Induced Protein 8 Like 1 Acts as a negative regulator of mTOR a

Assembly Factor For Spindle This gene is Involved in mitotic spindle regulation and

Homeobox B3 This gene is Sequence-specific transcription factor w

Homeobox B2 This gene is Sequence-specific transcription factor w

Homeobox B5 This gene is Sequence-specific transcription factor w

Homeobox B4 This gene is Sequence-specific transcription factor w

Tetraspanin 33 Plays an important role in normal erythr

Forkhead Box C2 This gene be Transcriptional activator. Might be involv

MutS Homolog 5 This gene en Involved in DNA mismatch repair and m

Minichromosome Maintenan The protein  $\epsilon$  Acts as a replication initiation factor that

Serine Protease 53 In vitro can degrade the fibrinogen alpha

Prickle Planar Cell Polarity Pr This gene encodes a homolog of Drosophila prickle. T

Forkhead Box C1 This gene be DNA-binding transcriptional factor that p

Small Nucleolar RNA, C/D Box 35B

Forkhead Box F1 This gene be Probable transcription activator for a nur

Centromere Protein A Centromeres Histone H3-like nucleosomal protein tha

Interleukin 21 Receptor The protein  $\epsilon$  This is a receptor for interleukin-21.

Centromere Protein E Centrosome- Microtubule plus-end-directed kinetocho

Centromere Protein F This gene en Required for kinetochore function and cl

G Protein Subunit Beta 4 Heterotrimeri Guanine nucleotide-binding proteins (G

Homeobox D4 This gene be Sequence-specific transcription factor w

Family With Sequence Similarity 72 Member D

Pleckstrin Homology Domain Containing A $\zeta$  Binds specifically to phosphatidylinositol

Snail Family Transcriptional R The Drosoph Involved in induction of the epithelial to r

Ankyrin Repeat And Sterile Alpha Motif Dor May be involved in vasopressin signaling

ZEB1 Antisense RNA 1 This locus produces long non-coding RNA that is tran

Serine/Threonine Kinase 36 This gene en Serine/threonine protein kinase which pl

Tripartite Motif Containing 45 This gene en May act as a transcriptional repressor in

Nuclear Receptor Subfamily 4 This gene en Orphan nuclear receptor. May act conce

Hyaluronan Mediated Motility The protein  $\epsilon$  Receptor for hyaluronic acid (HA) (By sir

GTPase, IMAP Family Memb This gene en The heterodimer formed by GIMAP2 and

Tripartite Motif Containing 32 The protein  $\epsilon$  Has an E3 ubiquitin ligase activity. Ubiqu

Protein Phosphatase, Mg $^{2+}$ /M This gene en Regulates the mitochondrial permeability

Heme Oxygenase 1 Heme oxygenase Heme oxygenase cleaves the heme ring

NSUN5 Pseudogene 2 This locus re May have S-adenosyl-L-methionine-dep

3-Hydroxy-3-Methylglutaryl-CoA Synthase · Catalyzes the condensation of acetyl-CoA and acetyl-CoA to form acetylacetyl-CoA.

MicroRNA 7111 microRNAs (miRNAs) are short (20-24 nt) non-coding RNA molecules that regulate gene expression.

Hes Family BHLH Transcription Factor This gene encodes a transcriptional repressor. Represses transcription of target genes.

Methylenetetrahydrofolate Reductase The protein encoded by this gene catalyzes the conversion of 5,10-methylenetetrahydrofolate to 5-methyltetrahydrofolate.

Fucose Kinase The protein encoded by this gene takes part in the salvage pathway for the synthesis of fucose.

Ectodysplasin A2 Receptor The protein encoded by this gene is a receptor for EDA isoform A2, but not for EDA isoform A1.

Family With Sequence Similarity 83 Member 1 May regulate the bone morphogenetic signaling pathway.

Trafficking Regulator And Signaling Adaptor Protein B Adapter protein which regulates several cellular trafficking pathways.

SH2 Domain Containing Adaptor Protein B Adapter protein which regulates several cellular trafficking pathways.

GLIS Family Zinc Finger 2 This gene is a transcription factor. Can act either as a transcriptional repressor or activator.

Kruppel Like Factor 13 KLF13 belongs to the Kruppel family of transcription factors. Represses transcription by binding to the DNA.

Selectin E The protein encoded by this gene is a cell-surface glycoprotein having a role in cell-cell interactions.

FBXL19 Antisense RNA 1 This gene encodes an antisense RNA.

Polo Like Kinase 3 The protein encoded by this gene is a serine/threonine-protein kinase involved in cell cycle regulation.

SRY-Box Transcription Factor This gene encodes a transcriptional activator that binds to the SRY-box.

NUF2 Component Of NDC80 This gene encodes a component of the essential kinetochore complex.

MicroRNA 1914 microRNAs (miRNAs) are short (20-24 nt) non-coding RNA molecules that regulate gene expression.

Vestigial Like Family Member 3 May act as a specific coactivator for the Vestigial protein.

WD Repeat And SOCS Box Containing Protein 1 This gene encodes a probable substrate-recognition component of the SCF complex.

Ring Finger Protein 215 This gene encodes a protein that plays a role in cardiac repolarization post-excitatory coupling.

Ring Finger Protein 207 This gene encodes a protein that plays a role in cardiac repolarization post-excitatory coupling.

Msh Homeobox 2 This gene encodes a transcriptional regulator in bone development.

Testin LIM Domain Protein Cancer-associated scaffold protein that may play a role in cell cycle regulation.

Clathrin Binding Box Of Aftiphilin Containing Protein 1 This gene encodes a protein that is involved in clathrin-mediated endocytosis.

Zinc Finger Protein 449 This gene encodes a protein that may be involved in transcriptional regulation.

Rho Related BTB Domain Containing Protein 1 The protein encoded by this gene belongs to the Rho GTPase signaling pathway.

WT1 Interacting Protein Adapter or scaffold protein which participates in the Wnt signaling pathway.

XPC Complex Subunit, DNA Repair Protein The protein encoded by this gene is involved in DNA repair, the XPC complex.

Advanced Glycosylation End-Glycosyltransferase The advanced glycosylation end-glycosyltransferase mediates interactions of advanced glycosylation end-products.

Protein Kinase C Epsilon Protein kinase Calcium-independent, phospholipid-dependent, and serine/threonine-specific.

Jagged Canonical Notch Ligand 1 The jagged 1 ligand for multiple Notch receptors and Delta-like receptors.

Macrophage Stimulating Protein 1 The protein encoded by this gene contains four kringle domains and is involved in macrophage activation.

Sphingosine Kinase 1 The protein encoded by this gene catalyzes the phosphorylation of sphingosine.

HIVEP Zinc Finger 2 This gene encodes a protein that specifically binds to the DNA.

Hexokinase 2 Hexokinases Catalyzes the phosphorylation of hexose to hexose-6-phosphate.

SplA/Ryanodine Receptor Domain And Signaling Protein Substrate recognition component of a signaling protein.

SKI Proto-Oncogene This gene encodes a protein that may play a role in terminal differentiation.

Essential Meiotic Structure-Specific Protein EME2 forms a DNA structure that interacts with MUS81 to form a DNA structure.

COX10 Antisense RNA 1

SKI Like Proto-Oncogene The protein ε May have regulatory role in cell division

Crystallin Beta-Gamma Domain Containing May function as suppressor of malignan

Aryl Hydrocarbon Receptor The protein ε Ligand-activated transcriptional activator

RAB30, Member RAS Oncogene Family The small GTPases Rab are key regulat

BTB Domain Containing 11

CDC28 Protein Kinase Regul:CKS2 proteir Binds to the catalytic subunit of the cycli

WASP Family Member 3 This gene en Downstream effector molecules involvec

Aldehyde Dehydrogenase 1 F This gene en NAD-dependent aldehyde dehydrogena:

PH Domain And Leucine Rich Repeat Prote Protein phosphatase involved in regulati

F-Box And Leucine Rich Rep: This gene en Substrate-recognition component of the

Neuregulin 1 The protein ε Direct ligand for ERBB3 and ERBB4 tyrc

ETS Proto-Oncogene 1, Tran: This gene en Transcription factor. Directly controls the

Aldehyde Dehydrogenase 3 F Aldehyde del ALDHs play a major role in the detoxific:

Nuclear Receptor Subfamily 1 This gene en Transcriptional repressor which coordin:

Hematopoietically Expressed This gene en Recognizes the DNA sequence 5'-ATTA

C-Type Lectin Domain Family This gene encodes a member of the C-type lectin/C-ty

SplA/Ryanodine Receptor Do This gene en Substrate recognition component of a S

CST Telomere Replication Cc This gene en Component of the CST complex propos

Mastermind Like Transcriptional Coactivato Acts as a transcriptional coactivator for f

DBF4 Zinc Finger B This gene en Regulatory subunit for CDC7 which activ

Adhesion Molecule With Ig Like Domain 2 Required for depolarization-dependent s

Proline And Serine Rich Coile This gene en Required for normal progression throug

Ecotropic Viral Integration Site 2A May complex with itself or/and other pro

Protein Tyrosine Phosphatas: This gene en Acts as negative regulator of T-cell rece

F-Box Protein 43 Members of f Required to establish and maintain the z

Ribonucleotide Reductase Re This gene en Plays a pivotal role in cell survival by rep

Rho Family GTPase 1 This gene en Lacks intrinsic GTPase activity. Has a lo

1-Aminocyclopropane-1-Carboxylate Synth Does not catalyze the synthesis of 1-am

Polo Like Kinase 2 The protein ε Tumor suppressor serine/threonine-prot

Poly(A) Specific Ribonucleas: This gene en Catalytic subunit of the poly(A)-nuclease

Apelin This gene en (Microbial infection) Endogenous ligand

Hdc Homolog, Cell Cycle Reg This gene en May play an important role in some hum

Tripartite Motif Containing 46 Microtubule-associated protein that is in

BMS1 Pseudogene 4

ST3 Beta-Galactoside Alpha-: The protein ε Responsible for the synthesis of the seq

Centromere Protein S This gene w: DNA-binding component of the Fanconi

Enhancer Of Zeste 1 Polycorr EZH1 is a co Polycomb group (PcG) protein. Catalytic

Alkaline Phosphatase, Biomin This gene en This isozyme plays a key role in skeletal  
MIR137 Host Gene

ALS2 C-Terminal Like Acts as a guanine nucleotide exchange  
Zinc Finger And BTB Domain Containing 4 Telomere-binding protein that acts as a  
Cell Division Cycle Associated 3 F-box-like protein which is required for e  
MAX Dimerization Protein 3 This gene en Transcriptional repressor. Binds with MA  
Placental Growth Factor This gene en Growth factor active in angiogenesis and  
SH3 Domain Binding Protein This gene en May function in transferrin receptor inter  
Family With Sequence Similarity 72 Member B

Claudin 7 This gene en Plays a major role in tight junction-speci  
DNA Polymerase Gamma 2, This gene en Mitochondrial polymerase processivity s  
Solute Carrier Family 25 Mem This gene en Transports arginine, lysine, homoarginin  
Phosphatidylinositol Specific Phospholipase C X Domain Containing 2

Unc-5 Netrin Receptor B This gene en Receptor for netrin required for axon gui  
Leucine Rich Repeat Containing 45 Component of the proteinaceous fiber-lil  
Hypoxia Inducible Factor 3 Su The protein ε [Isoform 2]: Attenuates the ability of tran  
Troponin Associated Protein Could be involved with bystin and trophi  
Cerebellin 3 Precursor Members of l May be involved in synaptic functions in  
Acid Phosphatase 6, Lysopho This gene en Hydrolyzes lysophosphatidic acid (LPA)  
Zinc Finger Protein 799 May be involved in transcriptional regula  
Small Nucleolar RNA Host Ge This gene is a member of the non-protein-coding mult  
Glucosamine (UDP-N-Acetyl)- The protein ε Regulates and initiates biosynthesis of N  
Mitogen-Activated Protein Kin This gene en Component of a protein kinase signal tra  
PIF1 5'-To-3' DNA Helicase This gene en DNA-dependent ATPase and 5'-3' DNA  
Terminal Nucleotidyltransferase 5A Probable nucleotidyltransferase that ma  
Small Nucleolar RNA, H/ACA Box 3A

Macrophage Stimulating 1 Pseudogene 2

Transcription Elongation Factor A N-Terminal And Central Domain Containing 2

Solute Carrier Family 16 Member 13 Proton-linked monocarboxylate transpor  
Kelch Like Family Member 17 The protein ε Substrate-recognition component of son  
Enolase Superfamily Member This gene ca Plays a role in the catabolism of L-fucos  
STAG3L5P-PVRIG2P-PILRB This locus represents naturally occurring readthrough  
Pleckstrin 2 The protein ε May help orchestrate cytoskeletal arrang  
Centromere Protein I This gene en Component of the CENPA-CAD (nucleo  
Ras Association Domain Fam This gene encodes a member of the Ras-association (c  
Enkurin, TRPC Channel Inter: This gene en Adapter that functions to localize a calci  
Nuclear Receptor Subfamily 5 The protein ε Nuclear receptor that acts as a key meta  
Stromal Antigen 3-Like 5 Pseudogene

## LYR Motif Containing 9

C-X-C Motif Chemokine Ligan The protein  $\epsilon$  IL-8 is a chemotactic factor that attracts

WD Repeat Domain 27 This gene encodes a protein with multiple WD repeats

Zinc Finger Protein 692 May be involved in transcriptional regula

Pleckstrin Homology Like Domain Family A p53/TP53-regulated repressor of Akt/AK

MDM2 Proto-Oncogene This gene en E3 ubiquitin-protein ligase that mediates

NIFK Antisense RNA 1

ADAM Metallopeptidase With This gene encodes a member of the ADAMTS (a disir

Myocyte Enhancer Factor 2A The protein  $\epsilon$  Transcriptional activator which binds spe

C-X-C Motif Chemokine Ligan This antimicr Chemoattractant active on T-lymphocyte

Transient Receptor Potential (The product (Calcium channel mediating constitutive (

Coiled-Coil Domain Containing 9B

Kruppel Like Factor 3 Binds to the CACCC box of erythroid cel

Terminal Nucleotidyltransferase 4B Terminal nucleotidyltransferase that cata

SLX1A-SULT1A3 Readthrough This locus represents naturally occurring read-through

TNF Superfamily Member 18 The protein  $\epsilon$  Cytokine that binds to TNFRSF18/AITR/

Myocyte Enhancer Factor 2C This locus er Transcription activator which binds spec

Immediate Early Response 5 This gene en Plays a role as a transcription factor (Pu

Activating Transcription Factor 7 Interacting Recruiter that couples transcriptional fac

Transmembrane Protein 198B (Pseudogene)

TNF Alpha Induced Protein 8 Like 3 Acts as a lipid transfer protein. Preferent

F2R Like Thrombin Or Trypsin This gene en Receptor for activated thrombin or trypsi

Baculoviral IAP Repeat Conta This gene en Multi-functional protein which regulates (

Family With Sequence Similarity 72 Membe May play a role in the regulation of cellul

V-Set And Immunoglobulin Domain Containing 2

CDC42 Effector Protein 4 The product (Probably involved in the organization of

Ankyrin Repeat Domain 36

Kelch Repeat And BTB Domain Containing 3

MicroRNA 503 microRNAs (miRNAs) are short (20-24 nt) non-coding

Ubiquitin C This gene rej [Ubiquitin]: Exists either covalently attac

Family With Sequence Similarity 131 Member A

Minichromosome Maintenanc The protein  $\epsilon$  Acts as component of the MCM2-7 com

GTP Binding Protein 2 GTP-binding proteins, or G proteins, constitute a supe

Phosphodiesterase 4D This gene en Hydrolyzes the second messenger cAM

ATP Binding Cassette Subfan The protein  $\epsilon$  Acts as a multispecific organic anion pur

RAB20, Member RAS Oncogene Family Plays a role in apical endocytosis/recycli

Shroom Family Member 1 SHROOM fai May be involved in the assembly of micr

TYRO3P Protein Tyrosine Kinase Pseudogene



|                                                         |                                           |                                                     |
|---------------------------------------------------------|-------------------------------------------|-----------------------------------------------------|
| Claudin 14                                              | Tight junction                            | Plays a major role in tight junction-specifi        |
| Fas Cell Surface Death Receptor                         | The protein is                            | Receptor for TNFSF6/FASLG. The adapter              |
| Trypsin Domain Containing 1                             | This gene encodes                         | Peroxisomal protease that mediates both             |
| DEP Domain Containing 1                                 |                                           | May be involved in transcriptional regulation       |
| G2/M-Phase Specific E3 Ubiquitin Protein Ligase         | E3 ubiquitin-protein ligase which accepts | RAB, Member Of RAS Oncogenes                        |
| This gene is                                            |                                           | Plays an essential role in male fertility, sperm    |
| BRICHOS Domain Containing 5                             |                                           |                                                     |
| Gap Junction Protein Gamma                              | This gene is                              | One gap junction consists of a cluster of           |
| Kruppel Like Factor 6                                   | This gene encodes                         | Transcriptional activator (By similarity). E        |
| Sodium Channel Epithelial 1 Subunit Delta               |                                           | Sodium permeable non-voltage-sensitive              |
| TNF Receptor Superfamily Member 1                       | The protein is                            | (Microbial infection) Acts as a receptor for        |
| Ankyrin Repeat Domain 23                                | This gene is                              | May be involved in the energy metabolism            |
| Forkhead Box O3B                                        |                                           | Transcription factor.                               |
| WD Repeat Domain 76                                     |                                           | Specifically binds 5-hydroxymethylcytosine          |
| Polo Like Kinase 1                                      | The Ser/Thr                               | Serine/threonine-protein kinase that phosphorylates |
| Aurora Kinase B                                         | This gene encodes                         | Serine/threonine-protein kinase component           |
| Forkhead Box O1                                         | This gene encodes                         | Transcription factor that is the main target        |
| Tuftelin 1                                              | Tuftelin is an                            | Involved in the mineralization and structural       |
| Inhibitor Of DNA Binding 2                              | The protein is                            | Transcriptional regulator (lacking a basic          |
| Atonal BHLH Transcription Factor 8                      |                                           | Transcription factor that binds a palindromic       |
| Ankyrin Repeat Domain 33B                               |                                           |                                                     |
| Decapping MRNA 1B                                       | This gene encodes                         | May play a role in the degradation of mRNA          |
| Citron Rho-Interacting Serine/Threonine Kinase          | This gene encodes                         | Plays a role in cytokinesis. Required for           |
| Inhibitor Of DNA Binding 1, Human                       | The protein is                            | Transcriptional regulator (lacking a basic          |
| Glutathione S-Transferase Theta                         | The protein is                            | Conjugation of reduced glutathione to a             |
| RCAN Family Member 3                                    |                                           | Inhibits calcineurin-dependent transcription        |
| Pro-Melanin Concentrating Hormone                       | This gene encodes                         | MCH may act as a neurotransmitter or neuropeptide   |
| Rho Guanine Nucleotide Exchange Factor                  |                                           | Promotes cell proliferation.                        |
| Phorbol-12-Myristate-13-Acetate-Induced Protein 1       |                                           | Promotes activation of caspases and apoptosis       |
| Spectrin Beta, Non-Erythrocytic 5                       |                                           |                                                     |
| MHC Class I Polypeptide-Related Sequence E (Pseudogene) |                                           |                                                     |
| Hes Family BHLH Transcription Factor 2                  |                                           | Transcriptional repressor of genes that regulate    |
| TTK Protein Kinase                                      | This gene encodes                         | Phosphorylates proteins on serine, threonine        |
| Aminoacidase-Semialdehyde Dehydrogenase                 | This gene encodes                         | Bifunctional enzyme that catalyzes the first        |
| Golgin A6 Family Like 9                                 |                                           |                                                     |
| Ras Homolog Family Member B                             |                                           | Mediates apoptosis in neoplastically transformed    |
| Interferon Induced Protein With Tetratricopeptide       |                                           | IFN-induced antiviral protein which acts as         |
| Zinc Finger Protein 696                                 |                                           | May be involved in transcriptional regulation       |

Sprouty Related EVH1 Domain This gene encodes a tyrosine kinase substrate that inhibits growth factor receptor signaling.  
 HLA Complex Group 25  
 Zinc Finger Protein 546 May be involved in transcriptional regulation.  
 Ras Association Domain Family 1 The protein encoded by this gene may play a role in regulating vesicular transport.  
 RCC1 Domain Containing 1 Plays a role in transcriptional repression.  
 Asialoglycoprotein Receptor 1 This gene encodes a receptor that mediates the endocytosis of plasma glycoproteins.  
 Zinc Finger Protein 514 May be involved in transcriptional regulation.  
 Kinesin Family Member 20A Mitotic kinesin required for chromosome segregation.  
 Plasminogen Activator, Urokinase Type This gene encodes a specific plasminogen activator that cleaves the zymogen plasminogen into plasmin.  
 KIT Ligand This gene encodes a ligand for the receptor-type protein-tyrosine kinase.  
 Leucine Rich Repeat Containing 75A  
 Tetratricopeptide Repeat Domain 14  
 Ligand Of Numb-Protein X 2  
 Coiled-Coil Domain Containing 142  
 ARVCF Delta Catenin Family Armadillo Receptor Involved in protein-protein interactions and cell signaling.  
 Carnitine Palmitoyltransferase This gene encodes an enzyme that may play a role in lipid metabolic processes.  
 Exonuclease 1 This gene encodes a 5' to 3' double-stranded DNA exonuclease.  
 Protein Phosphatase 1 Regulatory Myosin Light Chain 1 Inhibits protein phosphatase 1 activity to regulate myosin light chain phosphorylation.  
 Hect Domain And RLD 2 Pseudogene 9  
 Zinc Finger Protein 839  
 Hect Domain And RLD 2 Pseudogene 3  
 MN1 Proto-Oncogene, Transcriptional Activator Transcriptional activator which specifically activates transcription of the meningioma gene.  
 Phosphatidylinositol-4-Phosphate 3-Oxidase The protein encoded by this gene phosphorylates PtdIns and PtdIns4P with TOPBP1.  
 Interacting Checkpoint Protein 1 Treslin is involved in DNA replication and S/M arrest.  
 Zinc Finger Matrix-Type 3 This gene encodes a bona fide target gene of p53/TGF-beta.  
 Activating Transcription Factor 1 This gene encodes a protein that binds the cAMP response element.  
 DEP Domain Containing 1B  
 Sterile Alpha Motif Domain Containing 1 May play a role in atherogenesis by inhibiting cell cycle progression.  
 Cyclin E2 The protein encoded by this gene is essential for the control of the cell cycle.  
 Delta Like Canonical Notch Ligand This gene is involved in the Notch signaling pathway.  
 5-Hydroxytryptamine Receptor 1D G-protein coupled receptor for 5-hydroxytryptamine.  
 Mitochondrial RRNA Methyltransferase 1 S-adenosyl-L-methionine-dependent 2'-O-methyltransferase.  
 MicroRNA 6835 microRNAs (miRNAs) are short (20-24 nt) non-coding RNA molecules that regulate gene expression.  
 Tumor Protein P53 Inducible Nuclear Protein Antiproliferative and proapoptotic protein.  
 Rap Guanine Nucleotide Exchange Factor 1 Guanine nucleotide exchange factor (GEF) for Rap1.  
 DEPP1 Autophagy Regulator The expression of this gene is induced by FOXO3 in response to oxidative stress.  
 LBH Domain Containing 1 This gene shares three exons in common with another gene.  
 Ubiquitin Conjugating Enzyme 1 The modification of proteins by ubiquitin is a key step in the ubiquitin-proteasome pathway.

Tribbles Pseudokinase 1 Adapter protein involved in protein degradation.

Shugoshin 1 The protein ε Plays a central role in chromosome cohesion.

CACN Subunit Beta Associated Regulatory Negatively regulates voltage-gated calcium channels.

RRAD, Ras Related Glycolysis Inhibitor An May play an important role in cardiac angiogenesis.

Myotubularin Related Protein 4 Dephosphorylates proteins phosphorylated by myotubularin.

HYLS1 Centriolar And Ciliogenesis This gene encodes a protein that plays a role in ciliogenesis.

Marker Of Proliferation Ki-67 This gene encodes a protein that is required to maintain individual mitotic cycles.

Colony Stimulating Factor 3 This gene encodes a granulocyte/macrophage colony-stimulating factor.

Calcium Dependent Secretory Granule Protein This gene encodes a calcium-binding protein involved in exocytosis.

T-Box Transcription Factor 18 This gene encodes a transcriptional repressor involved in T-cell development.

Serpin Family B Member 8 The protein ε Has an important role in epithelial desmosomes.

Kinetochore Localized Astrin (SPAG5) Bin Encodes an essential component of the mitotic spindle.

Ankyrin Repeat Domain 35

Family With Sequence Similarity 193 Member B

Tyrosine Kinase Non Receptor Type 1 This gene encodes a non-receptor tyrosine-protein and serine/threonine kinase.

Dehydrogenase/Reductase 13 Putative oxidoreductase.

RE1 Silencing Transcription Factor 1 This gene was identified as a repressor of the 3' region of the human immunodeficiency virus type 1 (HIV-1) promoter.

Damage Specific DNA Binding Protein 1 This gene encodes a protein that inhibits UV-damaged DNA replication.

Poly(ADP-Ribose) Glycohydrolase Pseudogene 1

TGFβ Induced Factor Homeobox Protein 1 The protein ε Binds to a retinoid X receptor (RXR) response element.

Migration And Invasion Inhibitor 1 This gene encodes a protein that inhibits glioma cells invasion and down-regulates cell growth.

Growth Arrest And DNA Damage Inducible 1 This gene is involved in DNA damage response. In T-cells, functions as a regulator of p38.

CASTOR Family Member 3

Glypican 2 Cell surface proteoglycan that bears heparan sulfate chains.

Transforming Growth Factor E Receptor Type 2 The protein ε Transmembrane serine/threonine kinase.

SS18 Like 2 Synovial sarcomas occur most frequently in the extremities.

DEAD-Box Helicase 18 Pseudogene 5

Protein Phosphatase 1 Regulatory Subunit Inhibits PPP1CA phosphatase activity.

GLI Family Zinc Finger 4

Lysine Demethylase 7A Histone demethylase required for brain development.

Small ArfGAP 1 The protein ε GTPase activating protein that acts on Arp2/3 complex.

BCL6B Transcription Repressor Acts as a sequence-specific transcriptional repressor.

Noggin The secreted inhibitor of bone morphogenetic proteins.

Lysine Demethylase 3A This gene encodes a histone demethylase that specifically demethylates lysine 9 on histone H3.

KIT Proto-Oncogene, Receptor Tyrosine Kinase This gene encodes a tyrosine-protein kinase that acts as cell growth factor receptor.

Small Nucleolar RNA Host Gene 10 This gene is small nucleolar RNA host gene 10 and related to other host genes.

Hes Family BHLH Transcription Factor 4 Transcriptional repressor. Binds DNA or RNA.

DNA Damage Inducible Transcription Factor 3 This gene encodes a protein that is product of the upstream promoter.

NEDD4 Like E3 Ubiquitin Protein Ligase This gene encodes an E3 ubiquitin-protein ligase which accepts 3-Oxoacyl-ACP Synthase, Mitochondrial This gene may play a role in the biosynthesis of lipids.  
Coiled-Coil Domain Containing 121

Diacylglycerol Kinase Theta The protein encodes Phosphorylates diacylglycerol (DAG) to form phosphatidate.  
Malignant Fibrous Histiocytoma Identified in Mice Probable GTP-binding protein (PubMed:11111111)  
Pre-mRNA Processing Factor This gene encodes May be involved in pre-mRNA splicing.

Nei Like DNA Glycosylase 1 This gene is involved in base excision repair of DNA.  
Transmembrane Protein 42

Heat Shock Factor Binding Protein 1 Like 1

Chromosome 3 Open Reading Frame 18

Coiled-Coil Domain Containing 71 Like

Synemin The protein encodes Type-VI intermediate filament (IF) which

TIMP Metalloproteinase Inhibitor This gene encodes Complexes with metalloproteinases (such as

MiR-17-92a-1 Cluster Host Gene This gene is the host gene for the MIR17-92 cluster, a

C-Type Lectin Domain Family 4 Member G Pseudogene 1

Ribosomal Protein S6 Kinase A5 Serine/threonine-protein kinase that is re

Family With Sequence Similarity 1 This gene encodes a protein with a trypsin-like cysteine

Hect Domain And RLD 2 Pseudogene 2

Family With Sequence Similarity 27 Member B

MicroRNA 10b microRNAs (miRNAs) are short (20-24 nt) non-coding

Ubiquitin Like With PHD And Zinc Finger Domain This gene encodes Multidomain protein that acts as a key e

Gap Junction Protein Alpha 5 This gene is One gap junction consists of a cluster of

Regulator Of G Protein Signaling Regulator of G protein-coupled receptor si

Zinc Finger And BTB Domain This gene encodes Transcriptional repressor that plays a rol

Zinc Finger Protein 780B May be involved in transcriptional regula

MicroRNA 3189 microRNAs (miRNAs) are short (20-24 nt) non-coding

Tolloid Like 1 This gene encodes Protease which processes procollagen (C

Chromosome 3 Open Reading Frame 52

EGF Like Domain Multiple 8

CD274 Molecule This gene encodes Plays a critical role in induction and main

Prostate Transmembrane Protein This gene encodes Functions as a negative regulator of TGF

MicroRNA 3153 microRNAs (miRNAs) are short (20-24 nt) non-coding

Regulatory Factor X2 This gene is Transcription factor that acts as a key re

DLC1 Rho GTPase Activating Protein This gene encodes Functions as a GTPase-activating protei

Thrombospondin Type 1 Domain The protein encoded by this gene contains a type 1 th

Retinoic Acid Receptor Beta This gene encodes Receptor for retinoic acid. Retinoic acid

N-Myc Downstream Regulator This gene is Stress-responsive protein involved in ho

STEAP2 Metalloreductase This gene is Metalloreductase that has the ability to r

Tensin 2 The protein ε Tyrosine-protein phosphatase which reg BMP And Activin Membrane E This gene en Negatively regulates TGF-beta signaling PH Domain Containing Endoc This gene en Plays a role in endocytic trafficking. Req Ribosomal Protein S6 Kinase Related

Ankyrin Repeat Domain 34A

Cytochrome P450 Family 26 This gene en A cytochrome P450 monooxygenase inv Ankyrin Repeat Domain 36B

Potassium Inwardly Rectifying Potassium c Potassium cl Probably participates in establishing acti CEA Cell Adhesion Molecule This gene en [Isoform 1]: Cell adhesion protein that m Gasdermin B This gene en The N-terminal moiety promotes pyroptc RAD52 Homolog, DNA Repai The protein ε Involved in double-stranded break repair Kinesin Family Member 18B In complex with KIF2C, constitutes the n G Protein Subunit Beta 3 Heterotrimeri Guanine nucleotide-binding proteins (G RAD51 Recombinase The protein ε Plays an important role in homologous s NSUN5 Pseudogene 1 This locus represents a transcribed pseudogene of a Glutamine Rich 2 Has an essential role in the formation of G Protein Subunit Alpha I1 Guanine nuc Guanine nucleotide-binding proteins (G Inka Box Actin Regulator 2 Inhibitor of the serine/threonine-protein I MYCBP Associated Protein May play a role in spermatogenesis. Ma MicroRNA 5581 microRNAs (miRNAs) are short (20-24 nt) non-coding Zinc Finger Protein 436 May be a transcriptional repressor.

Proliferation-Associated 2G4 Pseudogene 1

Kruppel Like Factor 4 This gene en Transcription factor; can act both as acti Transcriptional And Immune F This gene en Seems to be involved in the regulation o Centrosomal Protein 44

BTG3 Associated Nuclear Prc This gene en Controls V(D)J recombination during T-c Neuronal Tyrosine Phosphorylated Phosph Activates PI3K and concomitantly recrui Janus Kinase 1 This gene en Tyrosine kinase of the non-receptor type Bardet-Biedl Syndrome 10 This gene is Probable molecular chaperone that assi Hydroxypyruvate Isomerase (l This gene en Catalyzes the reversible isomerization b Sirtuin 1 This gene en (Microbial infection) In case of HIV-1 infe DNA Topoisomerase II Alpha This gene en Control of topological states of DNA by t Jun Proto-Oncogene, AP-1 Tr This gene is Transcription factor that recognizes and BCL3 Transcription Coactivat This gene is Contributes to the regulation of transcrip JunB Proto-Oncogene, AP-1 Transcription Transcription factor involved in regulatin RAS P21 Protein Activator 2 The protein ε Inhibitory regulator of the Ras-cyclic AM Leucine Rich Repeat Containi This gene en Key regulator of transforming growth fac Inositol-Trisphosphate 3-Kina: The protein encoded by this protein regulates inositol

## Family With Sequence Similarity 24 Member B

Acyl-CoA Dehydrogenase Far This gene en Acyl-CoA dehydrogenase only active wit  
Nuclear Pore Complex Interacting Protein Family Member B4

Integrin Subunit Beta 8 This gene is Integrin alpha-V:beta-8 (ITGAV:ITGB8) i

Deoxyribonuclease 1 Like 2 Divalent cation-dependent acid DNA enc

MicroRNA 221 microRNAs (miRNAs) are short (20-24 nt) non-coding

Deoxyribonuclease 1 This gene en Serum endocuclease secreted into body

RING1 And YY1 Binding Protein Component of a Polycomb group (PcG)

Pyroglutamyl-Peptidase I The gene en Removes 5-oxoproline from various pen

Transcription Factor 7 Like 2 This gene en Participates in the Wnt signaling pathwa

BEN Domain Containing 3 Transcriptional repressor which associat

Interleukin 1 Receptor Associated Kinase 1 Component of the IRAK1-dependent TN

BUB1 Mitotic Checkpoint Seri This gene en Essential component of the mitotic chec

BUB1 Mitotic Checkpoint Seri This gene en Serine/threonine-protein kinase that per

Galactose-1-Phosphate Uridy Galactose-1- Plays an important role in galactose met

BTG Anti-Proliferation Factor This gene is Anti-proliferative protein.

Origin Recognition Complex  $\epsilon$  The origin rei Component of the origin recognition con

UFM1 Specific Peptidase 1 (I This gene encodes a protein that is similar to other Uf

Paired Immunoglobulin Like Ty The paired in Paired receptors consist of highly relatec

Shugoshin 2 Cooperates with PPP2CA to protect cen

Kruppel Like Factor 5 This gene en Transcription factor that binds to GC bo

Centromere Protein L CENPL is a  $\epsilon$  Component of the CENPA-CAD (nucleo

DNA Methyltransferase 3 Bet CpG methyla Required for genome-wide de novo metl

Kinesin Family Member 18A KIF18A is a r Microtubule-depolymerizing kinesin whic

HOXA Transcript Antisense R This non-coding locus is located in the HOX gene clus

Bone Morphogenetic Protein  $\epsilon$  This gene en Induces cartilage and bone formation. A

Serpin Family B Member 2 Inhibits urokinase-type plasminogen acti

Vasorin May act as an inhibitor of TGF-beta sign

Ras Association Domain Family Member 7 Negatively regulates stress-induced JNK

Acyl-CoA Binding Domain Co This gene en Binds medium- and long-chain acyl-CoA

Bone Morphogenetic Protein  $\epsilon$  This gene en Induces cartilage and bone formation (P

BCL6 Corepressor The protein  $\epsilon$  Transcriptional corepressor. May specifi

Interferon Regulatory Factor  $\epsilon$  This gene en Probable DNA-binding transcriptional ac

Solute Carrier Family 23 Member 3

Anoctamin 8 Does not exhibit calcium-activated chlori

Lipase G, Endothelial Type The protein  $\epsilon$  Exerts both phospholipase and triglyceri

Hes Related Family BHLH Tr This gene en Transcriptional repressor which binds pr

FERM Domain Containing 3 The protein  $\epsilon$  Putative tumor suppressor gene that ma



RNA Component Of Signal Recognition Particle 1 The signal recognition particle (SRP) is a cytoplasmic ribonucleoprotein complex consisting of a 70 kDa protein and a 16S ribosomal RNA. The protein subunit is composed of two subunits, alpha and beta, which are both essential for the function of the SRP. The beta subunit is thought to be the primary binding site for the signal sequence of the nascent polypeptide chain. The alpha subunit is thought to be involved in the translocation of the polypeptide chain through the protein-conducting channel of the membrane. The 16S RNA subunit is thought to be involved in the binding of the SRP to the ribosome.

Folliculin Interacting Protein 2 This gene encodes a protein that is a binding partner of the GTPase-activating protein (GAP) and is involved in the regulation of the RAS signaling pathway.

LON Peptidase N-Terminal Domain 1 The protein encoded by this gene contains a RING finger domain and is involved in the regulation of the RAS signaling pathway.

Inner Centromere Protein 1 In mammalia Component of the chromosomal passenger complex (CPC) that is involved in the regulation of the mitotic spindle.

TEA Domain Transcription Factor 1 This gene encodes a transcription factor which plays a key role in the regulation of gene expression.

Small Nucleolar RNA, H/ACA Box 55 Small nucleolar RNAs (snoRNAs) are small noncoding RNAs that are involved in the modification of ribosomal RNA.

Ring Finger Protein 19B This gene encodes an E3 ubiquitin-protein ligase which accepts ubiquitin from the E2 ubiquitin-conjugating enzyme.

GTP Cyclohydrolase 1 This gene encodes a protein that positively regulates nitric oxide synthesis.

Small Nucleolar RNA, C/D Box 55

NUAK Family Kinase 2 Stress-activated kinase involved in the regulation of cell growth and survival.

H3 Clustered Histone 6 Histones are core components of nucleosomes. Nucleosomes are the basic units of chromatin structure.

Chromosome 7 Open Reading Frame 61

Gypsy Retrotransposon Integrase 1

Transcription Factor AP-2 Alpha The protein encoded by this gene is a sequence-specific DNA-binding protein.

Tripartite Motif Containing 59 May serve as a multifunctional regulator of gene expression.

BCAS3 Microtubule Associated Cell Migration Inhibitor 1 Plays a role in angiogenesis. Participates in the regulation of cell migration.

Zinc Finger Protein 367 Transcriptional activator. Isoform 1 may be involved in the regulation of gene expression.

Follistatin Like 3 Follistatin-like protein. Isoform 1 or the secreted form is a binding partner of activin.

GATA Binding Protein 2 This gene encodes a transcriptional activator which regulates gene expression.

Protocadherin 1 This gene encodes a protein that may be involved in cell-cell interaction.

TBC1 Domain Family Member 3F Acts as a GTPase activating protein for the RAS signaling pathway.

Growth Arrest Specific 2 Like 3 Cytoskeletal linker protein. May promote cell growth arrest.

Sorting Nexin 22 The protein encoded by this gene may be involved in several stages of intracellular trafficking.

GATA Binding Protein 6 This gene encodes a transcriptional activator (PubMed:19666666).

Glucosylceramidase Beta Pseudogene 1

Oxidative Stress Induced Growth Inhibitor 1 May be involved in meiosis or the maturation of oocytes.

RANBP2 Like And GRIP Domain 1 RAN is a small GTP-binding protein of the RAS superfamily.

BORA Aurora Kinase A Activator 1 BORA is an activator of AURKA at the centrosome.

Carbohydrate Sulfotransferase 1 This gene encodes a sulfotransferase that utilizes 3'-phosphoadenosine 5-phosphate (PAPS) as a sulfate donor.

Interleukin 11 The protein encoded by this gene is a cytokine that stimulates the proliferation of hematopoietic cells.

Kinesin Family Member 15 Plus-end directed kinesin-like motor enzyme.

Small Cajal Body-Specific RNA 21

Gastrulation Brain Homeobox 2 May act as a transcription factor for cell differentiation.

ADAM Metallopeptidase With Thrombospondin Type 1 Motif 1 Cleaves the large aggregating proteoglycans.

Transforming Growth Factor Alpha This gene encodes TGF alpha, a mitogenic polypeptide that is a member of the transforming growth factor (TGF) superfamily.

Syntaxin 3 The gene encodes a protein that is potentially involved in docking of synaptic vesicles.

SMAD Specific E3 Ubiquitin Ligase 1 This gene encodes an E3 ubiquitin-protein ligase that acts as a transcriptional repressor.



L3MBTL Histone Methyl-Lysinase 1 This gene encodes a Polycomb group (PcG) protein that specifies the expression of the Zinc Finger Protein, FOG Family Member 1 Transcription regulator that plays an essential role in the regulation of the Nudix Hydrolase 16 RNA-binding and decapping enzyme that is involved in the regulation of the Kinesin Family Member 23 The protein encoded by this gene is a component of the central spindle complex. It is involved in the regulation of the Four-Jointed Box Kinase 1 The protein encoded by this gene acts as an inhibitor of dendrite extension. It is involved in the regulation of Ectodysplasin A The protein encoded by this gene [isoform 1]: binds only to the receptor Ectodysplasin A. It is involved in the regulation of the Nei Like DNA Glycosylase 3 NEIL3 belongs to the DNA glycosylase which prefers single-stranded DNA. It is involved in the regulation of the Chromosome 9 Open Reading Frame 47

Potassium Voltage-Gated Channel Subunit K4 This gene encodes a regulatory subunit of Kv4/D (Shal)-type voltage-gated potassium channels. It is involved in the regulation of the Rho GTPase Binding Protein 1 Has no enzymatic activity. May serve as a transcription factor. It is involved in the regulation of the Mitotic Arrest Deficient 2 Like MAD2L1 is a component of the spindle-assembly checkpoint. It is involved in the regulation of the Tsukushi, Small Leucine Rich Proteoglycan

Zinc Finger NFX1-Type Containing 1

CROCC Pseudogene 3

Glycophorin E (MNS Blood Group) The protein encoded by this gene is a minor sialoglycoprotein on the surface of erythrocytes. It is involved in the regulation of the Diacylglycerol Kinase Epsilon Diacylglycerol kinase that is involved in the regulation of the Membrane-bound diacylglycerol kinase 1

Aurora Kinase A The protein encoded by this gene is a mitotic serine/threonine kinase that contains a catalytic domain. It is involved in the regulation of the Aurora Kinase A Pseudogene 1

SMAD Family Member 6 The protein encoded by this gene acts as a mediator of TGF-beta and BMP signaling. It is involved in the regulation of the HOXB Cluster Antisense RNA 1

SMAD Family Member 7 The protein encoded by this gene acts as an antagonist of signaling by TGF-beta (transforming growth factor-beta). It is involved in the regulation of the Zinc Finger MIZ-Type Containing 1 This gene encodes a transcriptional coactivator. It is involved in the regulation of the SMAD Family Member 9 The protein encoded by this gene is a transcriptional modulator activated by BMP signaling. It is involved in the regulation of the Zinc Finger CCCH-Type Containing, Antiviral 1 Like

Prostaglandin-Endoperoxide Synthase 2 Receptor The protein encoded by this gene is a receptor for prostacyclin (prostaglandin I2). It is involved in the regulation of the Nicotinamide Adenine Dinucleotide Phosphate Dehydrogenase 1 This protein encoded by this gene localizes to the nucleus. It is involved in the regulation of the Endo-Beta-N-Acetylglucosaminidase 1 This gene encodes an endoglycosidase that releases N-glycanase. It is involved in the regulation of the Apolipoprotein L Domain Containing 1 APOLD1 is a member of the apolipoprotein L domain. It may be involved in angiogenesis. It is involved in the regulation of the MutS Homolog 6 This gene encodes a component of the post-replicative DNA damage checkpoint. It is involved in the regulation of the Prostaglandin-Endoperoxide Synthase 2 Receptor Dual cyclooxygenase and peroxidase in the regulation of the Major Facilitator Superfamily Domain Containing 3

Coiled-Coil Domain Containing 14 Negatively regulates centriole duplication

Coiled-Coil Domain Containing 191

MIR155 Host Gene This gene represents a microRNA host gene. The long non-coding RNA encoded by this gene is involved in the regulation of the Synaptonemal Complex Central Element P May be involved in meiosis.

Apoptosis Enhancing Nuclease Exonuclease with activity against single-stranded DNA

DNA Polymerase Theta DNA polymerase that promotes microhomology-mediated end joining

Methylenetetrahydrofolate Synthetase Domain Containing



TSC22 Domain Family Member TSC22D4 is a transcriptional repressor.

SERTA Domain Containing 1 Acts at E2F-responsive promoters as co-repressor.

Phenylalanyl-tRNA Synthetase This gene encodes a protein responsible for the charging of tRNA with phenylalanine.

ANKH Inorganic Pyrophosphatase This gene encodes a protein that regulates intra- and extracellular levels of inorganic pyrophosphate.

Phosphoinositide-3-Kinase Related Kinase Binds to activated (phosphorylated) protein tyrosine kinases.

Ectodermal-Neural Cortex 1 This gene encodes an actin-binding protein involved in the regulation of cell growth and differentiation.

G Protein Signaling Modulator 1 The protein encoded by this gene plays an important role in mitotic spindle formation.

Cysteine Rich DPF Motif Domain Containing 1

Fas Binding Factor 1 Keratin-binding protein required for epithelial cell proliferation.

Mitogen-Activated Protein Kinase 10 The protein encoded by this gene is a member of the JNK-interacting protein (JIP) group.

RUNX1 Partner Transcription Factor This gene encodes a transcriptional corepressor which facilitates transcriptional repression.

Dihydropyrimidinase Like 3 Necessary for signaling by class 3 semaphorins.

LIF Interleukin 6 Family Cytokine Receptor The protein encoded by this gene is LIF, which has the capacity to induce terminal differentiation of hematopoietic stem cells.

SRY-Box Transcription Factor This gene encodes a transcription factor that binds to DNA at SRY-boxes.

Ankyrin Repeat And LEM Domain Containing 1 Endonuclease that probably plays a role in DNA replication.

Gem Nuclear Organelle Associated Protein This gene encodes a protein that is a component of the SMN complex, which plays a catalytic role in the assembly of the SMN complex.

FERM Domain Containing 4B This gene encodes a member of the GRP1 signaling complex.

MT-RNR2 Like 8 Plays a role as a neuroprotective and anti-apoptotic protein.

Nuclear Receptor Subfamily 1 This gene encodes a transcriptional repressor which coordinates the expression of genes involved in cell differentiation.

Nucleic Acid Binding Protein 1 Single-strand binding protein component of the SOSS complex, a multiprotein complex that is involved in DNA replication.

Small Integral Membrane Protein 8

Protein Phosphatase, Mg<sup>2+</sup>/Mn<sup>2+</sup> Dependent The protein encoded by this gene is involved in the negative regulation of p53.

NIMA Related Kinase 2 This gene encodes a protein that phosphorylates and activates the NIMA-related kinase 2.

Zinc Finger CCCH-Type Containing 12C May function as an RNase and regulate the expression of target genes.

Interactor Of Hormad1 1 Required for DNA double-strand break repair.

Low Density Lipoprotein Receptor (Microbial Infection) The low density lipoprotein receptor acts as a receptor for microbial infection.

Spindlin Family Member 3 Exhibits H3K4me3-binding activity.

Stomatin This gene encodes a protein that regulates ion channel activity and transmembrane signaling.

G Protein-Coupled Receptor 1 This gene encodes a receptor for the neuroprotective and gliotrophic factor, sphingosine-1-phosphate.

PR/SET Domain 15 Sequence-specific DNA-binding transcription factor.

Glycerophosphodiester Phosphatase This gene encodes a protein that hydrolyzes lysoglycerophospholipids to glycerol and phospholipid head groups.

Zinc Finger Protein 251 May be involved in transcriptional regulation.

Kelch Like Family Member 35

MicroRNA 3191 microRNAs (miRNAs) are short (20-24 nt) non-coding RNA molecules that regulate gene expression.

G Protein Subunit Alpha 14 This gene encodes a guanine nucleotide-binding protein (G protein) subunit.

Neural Precursor Cell Expressor 1 The protein encoded by this gene is a docking protein which plays a central role in the development of the nervous system.

Pleckstrin Homology Domain Containing J1

G-Quadruplex Forming Sequence Containing LncRNA

Leucine Rich Adaptor Protein 1 Like

Myelin Expression Factor 2 Transcriptional repressor of the myelin b

ATPase Phospholipid Transp The protein ε P4-ATPase flippase which catalyzes the

Transforming Acidic Coiled-C Transforming Plays a role in the microtubule-depende

SRY-Box Transcription Factor This intronle Transcriptional activator that binds with I

Chromosome 11 Open Reading Frame 96

CFAP20 Domain Containing

LFNG O-Fucosylpeptide 3-Be This gene is Glycosyltransferase that initiates the elo

MIRLET7B Host Gene

Ras And Rab Interactor 1 Ras effector protein, which may serve as

Potassium Calcium-Activated MaxiK chann Regulatory subunit of the calcium activa

Phosphodiesterase 7B The 3',5'-cycl Hydrolyzes the second messenger cAMI

Meteorin Like, Glial Cell Differentiation Reg Hormone induced following exercise or c

Protein Tyrosine Phosphatase This gene en Protein tyrosine phosphatase which stim

Tripartite Motif Containing 69 This gene en May have E3 ubiquitin-protein ligase act

BCL2 Binding Component 3 This gene en [Isoform 3]: Does not affect cell growth.]

E74 Like ETS Transcription F The protein ε Transcriptional activator that binds to DN

Nuclear Factor, Erythroid 2 Lil This gene en Transcription factor that plays a key role

Nuclear Factor Of Activated T The product ε Plays a role in the inducible expression c

EMAP Like 1 Human echir Modulates the assembly and organizatic

Nuclear Factor Of Activated T This gene is ε Plays a role in the inducible expression c

Leucine Zipper Protein 1 This gene encodes a protein that contains a leucine z

Sterile Alpha Motif Domain Containing 10

HEXIM P-TEFb Complex Sub Expression o Transcriptional regulator which functions

Mitogen-Activated Protein Kin This gene en Part of a non-canonical MAPK signaling

Intermediate Filament Family This gene is a member of the intermediate filament fa

Cell Division Cycle Associatec This gene en Component of the chromosomal passen

Chromosome 21 Open Reading Frame 58

SUMO Specific Peptidase 7 The reversibl Protease that deconjugates SUMO2 and

IQCJ-SCHIP1 Readthrough This locus re May play a role in action potential condu

Ankyrin Repeat Domain 13D The protein ε Ubiquitin-binding protein that specifically

NFKB Inhibitor Alpha This gene en Inhibits the activity of dimeric NF-kappa-

Solute Carrier Family 30 Member 1 May be involved in zinc transport out of t

Dehydrogenase/Reductase 1 This gene encodes a member of the short-chain dehy

Cyclin F This gene en Substrate recognition component of a S

Cyclin E1 The protein ε Essential for the control of the cell cycle

E74 Like ETS Transcription F This gene en Transcription factor that activates the LY

Kelch Repeat And BTB Domain Containing 2

## Chromosome 1 Open Reading Frame 74

Ankyrin Repeat Domain 12 This gene encodes a protein that may recruit HDACs to the p160 coactivator.

C-X-C Motif Chemokine Ligand This antimicrobial peptide is produced by activated monocytes and neutrophils.

C-X-C Motif Chemokine Ligand This antimicrobial peptide is a ligand for CXCR2 (By similarity). Has a conserved C-X-C motif.

Small Nucleolar RNA, C/D Box 10 Intronic regions of ribosomal protein genes can harbor small nucleolar RNA (snoRNA) genes.

Microtubule Crosslinking Factor 1 Microtubule-associated factor involved in microtubule crosslinking.

NK3 Homeobox 1 This gene encodes a transcription factor, which binds preferentially to the NK3 homeobox sequence.

Early Growth Response 1 The protein encoded by this gene is a transcriptional regulator (PubMed:201200000).

Multiple EGF Like Domains 6

Tubulin Gamma Complex Associated Protein The protein encoded by this gene is a gamma-tubulin complex is necessary for microtubule anchoring.

Chromosome Transmission Factor This gene encodes a chromosome cohesion factor involved in chromosome segregation.

Methyltransferase Like 23 The protein encoded by this gene is a probable methyltransferase.

Zinc Finger BED-Type Containing 8

Cell Division Cycle 25A CDC25A is a tyrosine protein phosphatase which functions in the cell cycle.

Small Nucleolar RNA, C/D Box 14D

Activity Regulated Cytoskeleton Associated Protein Master regulator of synaptic plasticity through its interaction with the cytoskeleton.

Small Nucleolar RNA, C/D Box 14E

Phospholipase A2 Inhibitor And LY6/PLAUR Domain Containing

Growth Differentiation Factor 1 This gene encodes a protein that may play an active role in the motor axon growth cone.

TBC1 Domain Family Member 3H Acts as a GTPase activating protein for Rho GTPase.

Scavenger Receptor Class F Member 1 The protein encoded by this gene mediates the binding and degradation of oxidized low density lipoprotein.

Protein Tyrosine Phosphatase The protein encoded by this gene was identified as a protein tyrosine phosphatase.

Small Nucleolar RNA, C/D Box 14C

Ephrin A1 This gene encodes a cell surface GPI-bound ligand for Eph receptor tyrosine kinases.

Ankyrin Repeat And Sterile Alpha Motif Domain 1 Regulator of different signaling pathways.

Keratin 7 The protein encoded by this gene blocks interferon-dependent interphase cell cycle arrest.

Cell Division Cycle 6 The protein encoded by this gene is involved in the initiation of DNA replication.

Ankyrin Repeat Domain 36C

Cell Division Cycle 20 CDC20 is a ubiquitin ligase activity required for full ubiquitin ligase activity.

Chromosome 12 Open Reading Frame 60

Cyclin Dependent Kinase 1 The protein encoded by this gene (Microbial infection) acts as a receptor for cyclin D.

Extra Spindle Pole Bodies Like 1 Stable cohesin Caspase-like protease, which plays a central role in cell cycle regulation.

Rho GTPase Binding Protein This gene encodes a protein that binds specifically to GTP-Rho. May function in the regulation of cell cycle.

Zinc Finger Matrin-Type 1 This gene encodes a protein containing Cys2-His2 (C2H2) zinc finger motifs.

Neuralized E3 Ubiquitin Ligase The protein encoded by this gene promotes CCP110 ubiquitination and proteasomal degradation.

Family With Sequence Similarity 10 The protein encoded by this gene is a chromatin-associated protein required for transcriptional regulation.

Zinc Finger Protein 512 This gene encodes a protein that may be involved in transcriptional regulation.

Zinc Finger Protein 366 Has transcriptional repression activity. A member of the zinc finger protein family.

SEC31 Homolog B, COPII Co This gene en As a component of the coat protein com  
Phospholipid Phosphatase 3 The protein ε Independently of this phosphatase activi  
DExH-Box Helicase 34 DEAD box pr Probable ATP-binding RNA helicase.  
Nuclear Receptor Subfamily 3 This gene en [Isoform 10]: Has transcriptional activati  
SH2 Domain Containing 4A Inhibits estrogen-induced cell proliferatic  
Programmed Cell Death 1 Ligand 2 Involved in the costimulatory signal, ess  
Hes Family BHLH Transcriptic This protein l Transcriptional repressor of genes that r  
Mab-21 Domain Containing 2  
Serine/Threonine Kinase 32B This gene encodes a serine-threonine protein kinase.  
Hydroxysteroid 17-Beta Dehy The protein ε Bifunctional enzyme acting on the perox  
Heat Shock Protein Family A The protein ε Possesses chaperone activity in vitro w  
Histamine Receptor H1 Histamine is In peripheral tissues, the H1 subclass of  
Protein Tyrosine Kinase 2 Bel This gene en Non-receptor protein-tyrosine kinase tha  
Adenylate Kinase 5 This gene en Nucleoside monophosphate (NMP) kina  
4-Aminobutyrate Aminotransfr 4-aminobuty Catalyzes the conversion of gamma-ami  
ATP Binding Cassette Subfan The membra Plays an important role in the formation  
Acyl-CoA Synthetase Short C This gene en Catalyzes the synthesis of acetyl-CoA fr  
Carboxylesterase 2 This gene en Involved in the detoxification of xenobiot  
DNA Damage Regulated Autc This gene is Lysosomal modulator of autophagy that  
Bardet-Biedl Syndrome 9 This gene is The BBSome complex is thought to func  
TBC1 Domain Family Member 5 May act as a GTPase-activating protein  
Pleckstrin Homology And FYVE Domain Cc May induce apoptosis through the lysos  
Activating Signal Cointegrator This gene en 3'-5' DNA helicase involved in repair of a  
Poly(ADP-Ribose) Polymerase Family Merr ADP-ribosyltransferase which, in associ  
Histone Deacetylase 9 Histones play Isoform 3 lacks active site residues and  
Heat Shock Protein 90 Alpha The protein ε Molecular chaperone that promotes the  
Calcium Binding Tyrosine Phc To reach fert May function as a regulator of both motil  
Aconitase 1 The protein ε Catalyzes the isomerization of citrate to  
Netrin 4 This gene en May play an important role in neural, kid  
UL16 Binding Protein 1 The protein ε Binds and activates the KLRK1/NKG2D  
Family With Sequence Similarity 167 Member A  
TNF Receptor Superfamily Mε The protein ε Receptor for the cytotoxic ligand TRAIL.  
Solute Carrier Family 9 Memb This gene en Involved in pH regulation to eliminate ac  
EH Domain Containing 1 This gene be ATP- and membrane-binding protein the  
Platelet Derived Growth Factc The protein ε Growth factor that plays an essential rol  
DNA Polymerase Eta This gene en DNA polymerase specifically involved in  
Fibroblast Growth Factor 5 The protein ε Plays an important role in the regulation  
TNF Receptor Superfamily Mε This gene en (Microbial infection) Acts as a receptor f

Engulfment And Cell Motility 1 This gene en Involved in cytoskeletal rearrangements

Growth Differentiation Factor 1 This gene en Growth factor that controls proliferation ;

Atypical Chemokine Receptor The protein ε Atypical chemokine receptor that control

SWI/SNF Related, Matrix Ass This gene en Energy-transducing component of NURF

Interleukin 4 Induced 1 This gene en Lysosomal L-amino-acid oxidase with hi

Phosphatase Domain Containing Paladin 1

Neurologin 1 This gene en Cell surface protein involved in cell-cell-i

Solute Carrier Organic Anion Transporter F Mediates the Na(+)-independent transp

Zinc Finger And BTB Domain The protein ε Transcriptional regulator with bimodal DI

MOB Kinase Activator 3A May regulate the activity of kinases.

Pleckstrin Homology Domain Containing A6

Myosin IB Motor protein that may participate in pro

Four And A Half LIM Domains This gene en May function as a molecular transmitter

Adducin 3 Adducins are Membrane-cytoskeleton-associated prot

Diacylglycerol O-Acyltransferε This gene en Essential acyltransferase that catalyzes

Actin Filament Associated Protein 1 Like 1 May be involved in podosome and invad

ADP-Ribosylarginine Hydrolaε The enzyme Specifically acts as a arginine mono-ADI

Poly(ADP-Ribose) Polymeras This gene en Mono-ADP-ribosyltransferase that medic

NBAS Subunit Of NRZ Tether This gene en Involved in Golgi-to-endoplasmic reticul

FIG4 Phosphoinositide 5-Pho The protein ε The PI(3,5)P2 regulatory complex regulε

3-Hydroxy-3-Methylglutaryl-Cε The protein ε Mitochondrial 3-hydroxymethyl-3-methyl

Adrenoceptor Beta 2 This gene en Beta-adrenergic receptors mediate the c

Mitogen-Activated Protein Kin The protein ε Dual specificity kinase. Is activated by cy

Mitogen-Activated Protein Kin The protein ε Acts as a scaffold for the formation of a

Major Histocompatibility Com; MAIT (mucos; Antigen-presenting molecule specializec

Interferon Regulatory Factor 2 This gene en Probable E3 ubiquitin protein ligase invo

Glutamyl-Prolyl-TRNA Synthe Aminoacyl-tF Multifunctional protein which is primarily

Adenylate Kinase 9 The protein ε Involved in maintaining the homeostasis

Tubulin Beta 6 Class V Tubulin is the major constituent of micro

Tetratricopeptide Repeat Domain 30B Required for polyglutamylation of axonei

Apolipoprotein B MRNA Editir This gene is DNA deaminase (cytidine deaminase) w

Serine Dehydratase Like Has low serine dehydratase and threonii

Coiled-Coil Domain Containing 69 May act as a scaffold to regulate the rec

Protein Kinase CAMP-Depen; The protein ε Regulatory subunit of the cAMP-depend

Solute Carrier Family 22 Mem SLC22A23 belongs to a large family of transmembran

Cytokine Like 1 C17 is a cytokine-like protein specifically expressed in

Fatty Acid Hydroxylase Domain Containing Promotes megakaryocyte differentiation

HIC ZBTB Transcriptional Re; This gene fur Transcriptional repressor. Recognizes a

Mitochondria Localized Glutamic Acid Rich Plays a role in the trafficking of mitochondria

StAR Related Lipid Transfer Domain Contains May play metabolic roles in sperm maturation

NADPH Oxidase Activator 1 This gene encodes Functions as an activator of NOX1, a subunit of the

TNF Superfamily Member 15 The protein encodes Receptor for TNFRSF25 and TNFRSF61

Copine 3 Calcium-dependent Calcium-dependent phospholipid-binding protein

Interferon Induced With Helicase Domain DEAD box protein Innate immune receptor which acts as a

DOP1 Leucine Zipper Like Protein B May be involved in protein traffic between compartments

Phosphoglycerate Dehydrogenase This gene encodes Catalyzes the reversible oxidation of 3-phosphoglycerate

UBA Like Domain Containing 2

Caspase Recruitment Domain This gene encodes May be involved in apoptosis.

Aldehyde Dehydrogenase 3 Family Aldehyde dehydrogenase Catalyzes the oxidation of medium and long chain

TRAF3 Interacting Protein 2 This gene encodes Could be involved in the activation of both TRAF3 and

Niban Apoptosis Regulator 1 This gene encodes Regulates phosphorylation of a number of proteins

NLR Family CARD Domain Containing 1 This gene encodes Negative regulator of the innate immune response

Carboxymethylenebutenolidase CMBL (EC 3.1.1.10) Cysteine hydrolase. Can convert the propeptide

Ras And Rab Interactor Like Guanine nucleotide exchange factor (GEF)

TSC22 Domain Family Member This gene encodes Transcriptional repressor. Acts on the CREB

Ras Association Domain Family Member The function Potential tumor suppressor. May act as a

Target Of Myb1 Like 1 Membrane Trafficking Probable adapter protein involved in signaling

Claudin 1 Tight junction protein (Microbial infection) Acts as a receptor for

PC-Esterase Domain Containing This gene encodes a protein that belongs to the GDS

Fermitin Family Member 1 This gene encodes Involved in cell adhesion. Contributes to

Filamin A Interacting Protein 1 Like Acts as a regulator of the antiangiogenic

Solute Carrier Family 7 Member The protein encodes Involved in the sodium-independent uptake

Phosphatase And Actin Regulator The protein encodes Binds actin monomers (G actin) and plays

Myelin Basic Protein The protein encodes The classic group of MBP isoforms (isoforms)

Carboxypeptidase A4 This gene encodes Metalloprotease that could be involved in

DEXD/H-Box Helicase 60 DEAD box protein Positively regulates DDX58/RIG-I- and II

Annexin A4 Annexin IV (Calcium/phospholipid-binding protein with

Signal Regulatory Protein Beta 2

Interleukin 1 Alpha The protein encodes Produced by activated macrophages, IL-1

SH2 Domain Containing 2A This gene encodes Could be a T-cell-specific adapter protein

Glutamyl-TRNA Amidotransferase Subunit Allows the formation of correctly charged

Polypeptide N-Acetylgalactosaminyltransferase Catalyzes the initial reaction in O-linked

Proline-Serine-Threonine Phosphatase Interacts Binds to F-actin. May be involved in regulation

Coiled-Coil Domain Containing 85C May play a role in cell-cell adhesion and

G Protein-Coupled Receptor (Orphan) This gene encodes Orphan receptor. Could be involved in

Aldehyde Oxidase 1 Aldehyde oxidase Oxidase with broad substrate specificity,



Ankyrin 3 Ankyrins are [Isoform 5]: May be part of a Golgi-specific  
 CAMP Responsive Element Binding Protein Probable regulator of CREB1 transcription  
 Polypeptide N-Acetylgalactosyltransferase 1 This gene encodes a glycosylated phosphoprotein with  
 CAMP Responsive Element Binding Protein [Isoform 6]: May play a role in the regulation of  
 GTF2I Repeat Domain Containing 1 This gene encodes a glycosylated phosphoprotein with  
 C-C Motif Chemokine Receptor 1 This gene encodes a receptor for CCL19 and chemerin/RAR  
 Transmembrane And Coiled-Coil Domains 4  
 Secreted And Transmembrane Protein 1 This gene encodes a protein that may be involved in thymocyte signaling.  
 RAD50 Double Strand Break Binding Protein The protein encoded by this gene is a component of the MRN complex, which  
 Uncoupling Protein 2 Mitochondria UCP are mitochondrial transporter proteins that  
 Protocadherin 12 This gene encodes a cellular adhesion molecule that may play a role in  
 Collagen Type XVII Alpha 1 Chain This gene encodes a protein that may play a role in the integrity of hemidesmosomes.  
 Platelet Derived Growth Factor Receptor Alpha 1 This gene encodes a growth factor that plays an essential role in  
 Succinate Dehydrogenase Complex Subunit Cc This gene encodes a flavoprotein (FP) subunit of succinate dehydrogenase.  
 Tetraspanin 1 The protein encoded by this gene is a member of the tetraspanin family of cell surface proteins.  
 Apolipoprotein D This gene encodes APOD occurs in the macromolecular complex of high density lipoprotein.  
 Family With Sequence Similarity 107 Member 1 Stress-inducible actin-binding protein that may play a role in  
 Platelet Derived Growth Factor Receptor Alpha 1 This gene encodes a protein with significant sequence homology to  
 Syndecan 1 The protein encoded by this gene is a cell surface proteoglycan that bears both heparan sulfate and chondroitin sulfate.  
 Complement C1r Subcomponent Like 1 Mediates the proteolytic cleavage of HP, C3, and C5.  
 C-X-C Motif Chemokine Ligand 1 This gene encodes a protein involved in neutrophil activation. In vitro, it is a chemoattractant for  
 Alpha-L-Fucosidase 1 The protein encoded by this gene is alpha-L-fucosidase is responsible for hydrolyzing fucose residues on  
 Amyloid Beta Precursor Protein Like 1 This gene encodes a protein that may play a role in postsynaptic function.  
 DEXD/H-Box Helicase 58 DEAD box protein 58 is an innate immune receptor that senses cytosolic DNA.  
 MCC Regulator Of WNT Signaling 1 This gene is a candidate for the putative colorectal tumor suppressor gene.  
 Carnitine O-Octanoyltransferase 1 This gene encodes a beta-oxidation of fatty acids. The highest expression is in liver.  
 Proprotein Convertase Subtilisin 1 This gene encodes a protein involved in the processing of hormones and other proteins.  
 Stimulator Of Interferon Response Element Binding Protein 1 This gene encodes a protein with antiviral activity in response to  
 Signal Transducing Adaptor Protein 6 This gene encodes a substrate of protein kinase PTK6. May play a role in cell growth.  
 Sperm Tail PG-Rich Repeat Containing 1 May positively contribute to the induction of spermatogenesis.  
 Thymidylate Synthetase Thymidylate synthase: Contributes to the de novo mitochondrial DNA synthesis.  
 Radial Spoke Head 3 The protein encoded by this gene functions as a protein kinase A-anchoring protein.  
 Protein Tyrosine Phosphatase 1C This gene encodes a protein tyrosine phosphatase which stimulates cell growth.  
 Phosphodiesterase 1C This gene encodes a calmodulin-dependent cyclic nucleotide phosphodiesterase.  
 Solute Carrier Family 15 Member 3 Proton oligopeptide cotransporter. Transmembrane protein.  
 Prolyl 4-Hydroxylase Subunit 1 This gene encodes a protein that catalyzes the post-translational formation of hydroxyproline.  
 Aquaporin 3 (Gill Blood Group Antigen) This gene encodes a water channel required to promote glycolysis.  
 Coiled-Coil Domain Containing 125 May be involved in the regulation of cell growth.



ATPase Plasma Membrane C The protein ε Calcium/calmodulin-regulated and magr  
Intercellular Adhesion Molecu The protein ε ICAM proteins are ligands for the leukoc  
Phytanoyl-CoA 2-Hydroxylase This gene is . Catalyzes the 2-hydroxylation of not only  
RAB38, Member RAS Oncogene Family May be involved in melanosomal transp  
Mesenteric Estrogen Dependent Adipogenε Involved in processes that promote adip  
Transmembrane Protein 217

Heterogeneous Nuclear Ribonucleoprotein A1 Pseudogene 7

FERM Domain Containing 6

DNA Damage Inducible Transcript 4 Like Inhibits cell growth by regulating the TOI  
Intercellular Adhesion Molecu This gene en (Microbial infection) Acts as a receptor fr  
Nuclear Receptor Subfamily 3 This gene en Receptor for both mineralocorticoids (M  
Damage Specific DNA Bindinε The protein ε Protein, which is both involved in DNA re  
Coagulation Factor VIII Assoc This gene is . RAB5A effector molecule that is involvε  
Transglutaminase 2 Transglutami Catalyzes the cross-linking of proteins, s  
Eukaryotic Elongation Factor, Selenocystei Translation factor necessary for the inco  
MER Proto-Oncogene, Tyrosi This gene is . Receptor tyrosine kinase that transduce:  
Elongation Factor Like GTPase 1 Involved in the biogenesis of the 60S rib  
WSC Domain Containing 1

REV3 Like, DNA Directed Pol The protein ε Catalytic subunit of the DNA polymerase  
Opioid Growth Factor Receptor Like 1

AXL Receptor Tyrosine Kinas The protein ε (Microbial infection) Acts as a receptor fr  
RELB Proto-Oncogene, NF-KB Subunit NF-kappa-B is a pleiotropic transcription  
Chromosome 14 Open Reading Frame 93

Inducible T Cell Costimulator Ligand Ligand for the T-cell-specific cell surface  
Zyg-11 Related Cell Cycle Re This gene en Serves as substrate adapter subunit in t  
Ubiquitin Conjugating Enzymeε The modifica Catalyzes the covalent attachment of ub  
KiSS-1 Metastasis Suppresso This gene is . Metastasis suppressor protein in malign:  
Interleukin 32 This gene en Cytokine that may play a role in innate a  
Apolipoprotein L3 This gene is . May affect the movement of lipids in the  
SAM And SH3 Domain Conta This gene en Is a positive regulator of NF-kappa-B sig  
Dysferlin The protein ε Key calcium ion sensor involved in the C  
Aspartyl-TRNA Synthetase 1 This gene en Catalyzes the specific attachment of an  
DAB Adaptor Protein 2 This gene en Adapter protein that functions as clathrir  
Rhomboid 5 Homolog 2 Regulates ADAM17 protease, a shedda:  
Diacylglycerol Kinase Alpha The protein ε Diacylglycerol kinase that converts diacy  
Spectrin Repeat Containing N This gene en Multi-isomeric modular protein which for  
Potassium Calcium-Activated MaxiK chann Potassium channel activated by both me  
Toll Like Receptor 1 The protein ε Participates in the innate immune respoi

Potassium Calcium-Activated The protein ε Forms a voltage-independent potassium  
Toll Like Receptor 3 The protein ε Key component of innate and adaptive i  
N-Ethylmaleimide Sensitive Factor, Vesicle Required for vesicle-mediated transport.  
Angiopietin Like 4 This gene en [ANGPTL4 N-terminal chain]: Mediates i  
Galactose-3-O-Sulfotransfera This gene en Catalyzes the transfer of sulfate to beta-  
RAP2B, Member Of RAS Onc This intronles Small GTP-binding protein which cycles  
Glutamine Amidotransferase I This gene encodes a potential mitochondrial protein tl  
2'-5'-Oligoadenylate Syntheta: This gene en Interferon-induced, dsRNA-activated ant  
Cbp/P300 Interacting Transac The protein ε Transcriptional coactivator of the p300/C  
2'-5'-Oligoadenylate Syntheta: This gene en Interferon-induced, dsRNA-activated ant  
CD82 Molecule This metasta Associates with CD4 or CD8 and deliver  
Apolipoprotein L6 This gene is . May affect the movement of lipids in the  
Thyroid Hormone Receptor In This gene en Transcription coactivator which associat  
Myosin VC May be involved in transferrin trafficking.  
Junction Plakoglobin This gene en Common junctional plaque protein. The  
CRACD Like  
Dual Specificity Phosphatase This gene en Dual specificity protein phosphatase inv  
Bardet-Biedl Syndrome 2 This gene is . The BBSome complex is thought to func  
DEAD-Box Helicase 18 Pseudogene 1  
Phosphotriesterase Related  
Double PHD Fingers 3 This gene en Belongs to the neuron-specific chromati  
Tetratricopeptide Repeat Domain 12  
Spermatogenesis Associated This gene en Key regulator of mitochondrial quality th  
Cyclin D1 The protein ε Regulatory component of the cyclin D1-  
GDP-Mannose 4,6-Dehydrata GDP-manno: Catalyzes the conversion of GDP-D-mar  
Divergent Protein Kinase Domain 2B  
ADAM Metallopeptidase With This gene encodes a member of the ADAMTS (a disir  
Oxoglutarate Dehydrogenase This gene en 2-oxoglutarate dehydrogenase (E1) com  
Tribbles Pseudokinase 3 The protein ε Inactive protein kinase which acts as a r  
BCL2 Like 1 The protein ε Isoform Bcl-X(L) also regulates presyna  
Family With Sequence Similarity 210 Memt Plays a role in erythroid differentiation (F  
Sulfatase 2 Heparan sulf Exhibits arylsulfatase activity and highly  
Dynein Cytoplasmic 1 Intermediate Chain 2 Pseudogene 1  
Transcription Elongation Factor A3 Necessary for efficient RNA polymerase  
Angiopietin Like 2 Angiopietins: Induces sprouting in endothelial cells thr  
Dynein Cytoplasmic 1 Interme This gene en Acts as one of several non-catalytic acc  
TNFAIP3 Interacting Protein 1 This gene en Inhibits NF-kappa-B activation and TNF-  
Ras Homolog Family Member Ras homolog Involved in endosome dynamics. May cc

Integrin Subunit Alpha 2 This gene en (Microbial infection) Integrin ITGA2:ITGE

Succinyl-CoA:Glutarate-CoA This gene en Catalyzes the succinyl-CoA-dependent c

MORN Repeat Containing 4 Plays a role in promoting axonal degene

Integrin Subunit Alpha 3 The gene en: Integrin alpha-3/beta-1 is a receptor for i

Diaphanous Related Formin 2 The product i Could be involved in oogenesis. Involves

Polypeptide N-Acetylgalactos: This gene en Catalyzes the initial reaction in O-linked

Epoxide Hydrolase 4

Discs Large MAGUK Scaffold This gene en Essential multidomain scaffolding protei

Calmin

Phosphoserine Aminotransfer This gene en Catalyzes the reversible conversion of 3

Schwannomin Interacting Protein 1

THAP Domain Containing 8

Cell Death Inducing P53 Target 1 Acts as an important p53/TP53-apoptoti

Interleukin 1 Receptor Associ: IRAK2 encoc Binds to the IL-1 type I receptor followin

DENN Domain Containing 1A Clathrin (see Guanine nucleotide exchange factor (GE

WDFY Family Member 4 Plays a critical role in the regulation of cl

BCL2 Interacting Protein 3 Lik This gene en Induces apoptosis. Interacts with viral ar

Solute Carrier Family 7 Memb This gene is May be involved in arginine transport.

H2B Clustered Histone 12 Histones are Core component of nucleosome. Nuclec

Purinergic Receptor P2X 4 The product i Receptor for ATP that acts as a ligand-g

Iron-Sulfur Cluster Assembly | This gene en [Isoform 2]: Functions as a cytoplasmic :

Tripartite Motif Containing 22 The protein e Interferon-induced antiviral protein invol

Lysyl Oxidase Like 4 This gene en May modulate the formation of a collage

Uncharacterized LL21NC02-21A1.1

Coiled-Coil Domain Containing 136 May play a role in acrosome formation ir

Zinc Finger And AT-Hook Dor This gene en May be involved in transcriptional regula

Inositol Polyphosphate-5-Pho: This gene is Phosphatidylinositol (PtdIns) phosphata:

Ribonuclease L This gene en Endoribonuclease that functions in the ir

Tensin 3 May play a role in actin remodeling. Invc

Monoglyceride Lipase This gene en Converts monoacylglycerides to free fat

Gephyrin This gene en Microtubule-associated protein involved

H2B Clustered Histone 4 Histones are Core component of nucleosome. Nuclec

Paralemmin This gene en Involved in plasma membrane dynamics

Negative Regulator Of Reactive Oxygen Sp Key regulator of transforming growth fac

Sterile Alpha Motif Domain Cc This gene en May play a role in the inflammatory resp

Myosin Heavy Chain 16 Pseu The MYH16 i Has most probably lost the function in m

Cell Adhesion Molecule 4 Involved in the cell-cell adhesion. Has cæ

Gasdermin E Hearing impæ [Gasdermin-E, N-terminal]: Switches CA

Platelet Derived Growth Factor The protein ε Growth factor that plays an essential role in cell growth and differentiation.

Interleukin 12A This gene encodes a cytokine that can act as a growth factor for T cells.

Major Facilitator Superfamily Domain Containing 6

Guanylate Binding Protein 3 This gene encodes a protein that exhibits antiviral activity against influenza A virus.

Catenin Beta Interacting Protein 1 The protein ε Prevents the interaction between CTNNA1 and SH3 domain proteins.

SH3 Domain Binding Protein 5 Functions as a guanine nucleotide exchange factor for Rho GTPase.

Proteasome 26S Subunit, Non-ATPase The 26S proteasome component, a multicatalytic proteinase.

Carbohydrate Sulfotransferase This locus encodes a sulfotransferase that utilizes 3'-phosphoadenosine 5-phosphate.

Rabphilin 3A Like (Without C2) The protein ε Rab GTPase effector involved in the late endosome.

Eukaryotic Translation Elongation Factor 2 This gene encodes a protein that promotes the GTP-dependent activity of eukaryotic elongation factor 2.

Synaptotagmin 9 May be involved in Ca(2+)-dependent exocytosis.

Proteasome 26S Subunit, Non-ATPase The 26S proteasome component, a multicatalytic proteinase.

Y-Box Binding Protein 3 Binds to the GM-CSF promoter. Seems to be involved in transcription.

Rho GTPase Activating Protein 1 This gene encodes a Rho GTPase-activating protein involved in cell growth and differentiation.

Apolipoprotein L1 This gene encodes a protein that may play a role in lipid exchange and transport.

Proteasome 20S Subunit Beta The proteasome component, a multicatalytic proteinase.

NBR1 Autophagy Cargo Receptor The protein ε Acts probably as a receptor for selective autophagy.

EH Domain Containing 2 This gene encodes an ATP- and membrane-binding protein that is involved in cell growth and differentiation.

Myristoylated Alanine Rich Protein The protein ε MARCKS is the most prominent cellular protein that binds to phospholipids.

Solute Carrier Family 47 Member 1 This gene is a solute transporter for tetraethylammonium ions.

HLA Complex Group 11

SMAD Family Member 3 The SMAD family member, receptor-regulated SMAD (R-SMAD) that is involved in the TGF-β signaling pathway.

Myosin Light Chain Kinase This gene, a calcium/calmodulin-dependent myosin I kinase, is involved in muscle contraction.

Cilia And Flagella Associated Protein This protein ε Involved in spermatozoa motility (PubMed).

LDL Receptor Related Protein 1 This gene encodes a protein (Microbial infection) that functions as a receptor for LDL.

SH3 Domain Containing Ring Finger 3 Has E3 ubiquitin-protein ligase activity.

NIPA Like Domain Containing 3

Signal Induced Proliferation A This gene encodes a protein that plays a critical role in epithelial cell morphology and proliferation.

Membrane Palmitoylated Protein This gene encodes a protein that may play a role in retinal photoreceptors.

Tripartite Motif Containing 5 The protein ε Capsid-specific restriction factor that prevents viral replication.

Transmembrane Protein 140

Leucine Rich Repeat Containing 71

Lipase Maturation Factor 1 Involved in the maturation of specific prostanoids.

Leukotriene A4 Hydrolase The protein ε Epoxide hydrolase that catalyzes the final step in the biosynthesis of leukotrienes.

Hydroxysteroid Dehydrogenase Like 2 Has apparently no steroid dehydrogenase activity.

LDL Receptor Related Protein 1 This gene encodes a probable receptor, which is involved in lipid metabolism.

Cytoplasmic FMR1 Interacting Protein 2 Involved in T-cell adhesion and p53/TP53 signaling.

EPS8 Like 2 This gene encodes a protein that stimulates guanine exchange activity of Rho GTPase.

Basic Helix-Loop-Helix Family This gene en Transcriptional repressor involved in the  
 CUB Domain Containing Prot This gene en May be involved in cell adhesion and ce  
 Lamin A/C The nuclear l Lamins are components of the nuclear l  
 Leucine Rich Repeat Containi This gene encodes a member of the leucine-rich repe  
 F11 Receptor Tight junctior (Microbial infection) Acts as a receptor f  
 Par-6 Family Cell Polarity Reç This gene is Adapter protein involved in asymmetrica  
 Cyclin D2 The protein e Regulatory component of the cyclin D2-t  
 Pleckstrin Homology And RhoGEF Domain Containing G1  
 Serine Peptidase Inhibitor, Ku This gene en Inhibitor of HGF activator. Also inhibits p  
 RAB3D, Member RAS Oncogene Family Protein transport. Probably involved in re  
 V-Set And Immunoglobulin Dc This gene encodes a member of the junctional adhesi  
 Corepressor Interacting With RBPJ, CIR1 May modulate splice site selection durin  
 GAS6 Divergent Transcript  
 Tumor Protein P53 Inducible Protein 11  
 Ethanolamine Kinase 2 The protein e Highly specific for ethanolamine phosph  
 H2B Clustered Histone 5 Histones are Core component of nucleosome. Nuclec  
 PNMA Family Member 8A  
 CUGBP Elav-Like Family Mer Members of tRNA-binding protein implicated in the re  
 Actin Binding LIM Protein 1 This gene en May act as scaffold protein (By similarity  
 KH RNA Binding Domain Containing, Signe (Microbial infection) Involved in post-trar  
 Tetratricopeptide Repeat Domain 30A Required for polyglutamylatation of axone  
 Dihydropyrimidinase Like 2 This gene en Plays a role in neuronal development an  
 Apolipoprotein B MRNA Editir This gene is DNA deaminase (cytidine deaminase) w  
 Caspase 1 This gene en Thiol protease that cleaves IL-1 beta bel  
 Transporter 1, ATP Binding C The membra Involved in the transport of antigens from  
 PNMA Family Member 2  
 LIM Zinc Finger Domain Cont: The protein e Adapter protein in a cytoplasmic comple  
 Regulatory Associated Proteir This gene en Involved in the control of the mammaliar  
 SLIT-ROBO Rho GTPase Act The protein e GTPase-activating protein for RhoA and  
 Erythrocyte Membrane Protein Band 4.1 Lil Tumor suppressor that inhibits cell prolif  
 C-X-C Motif Chemokine Rece This gene en (Microbial infection) Acts as a corecepto  
 Caspase 7 This gene en Involved in the activation cascade of cas  
 NAC Alpha Domain Containing May prevent inappropriate targeting of n  
 Keratin 80 Keratins are intermediate filament proteins responsibl  
 Endosome-Lysosome Associ: Expression o May protect cells from cell death by indu  
 Golgi Phosphoprotein 3 Like The Golgi co Phosphatidylinositol-4-phosphate-bindin  
 NIMA Related Kinase 1 The protein e Phosphorylates serines and threonines,  
 ATP Binding Cassette Subfan The protein e Catalyzes the efflux of phospholipids su

|                                                  |                                                                      |
|--------------------------------------------------|----------------------------------------------------------------------|
| Nudix Hydrolase 8                                | Probably mediates the hydrolysis of some                             |
| Lysosomal Associated Membrane Protein 1          | Dendritic cell May play a role in dendritic cell function            |
| EPH Receptor A4                                  | This gene encodes a Receptor tyrosine kinase which binds to          |
| INSC Spindle Orientation 1                       | In Drosophila May function as an adapter linking the P               |
| Nuclear Factor, Erythroid 2-Like 1               | This gene encodes an Activates erythroid-specific, globin gene       |
| CAMP Responsive Element Binding Protein 1        | The protein ε (Microbial infection) May play a role in               |
| Cartilage Acidic Protein 1                       | This gene encodes a glycosylated extracellular matrix                |
| Glutathione Peroxidase 3                         | The protein ε Protects cells and enzymes from oxidative              |
| Nuclear Receptor Corepressor 1                   | This gene encodes a Transcriptional corepressor (PubMed:20           |
| Laminin Subunit Beta 3                           | The product ε Binding to cells via a high affinity receptor          |
| PBX Homeobox Interacting Protein 1               | The protein ε Regulator of pre-B-cell leukemia transcription         |
| Laminin Subunit Gamma 2                          | Laminins, a family of Binding to cells via a high affinity receptor  |
| Phospholipase C Like 2                           | May play an role in the regulation of Insulin                        |
| Glypican 1                                       | Cell surface proteoglycan that bears heparan sulfate                 |
| Neurofibromin 2                                  | This gene encodes a Probable regulator of the Hippo/SWH (S           |
| T Cell Receptor Alpha Constant Region            | T cell receptor Constant region of T cell receptor (TR) ε            |
| Serine Peptidase Inhibitor, Kunitz Type 1        | The protein ε Inhibitor of HGF activator. Also acts as a             |
| Fasciculation And Elongation Factor 1            | This gene is involved in May be involved in axonal outgrowth as      |
| ORAI Calcium Release-Activated Calcium Channel 1 | Ca(2+) release-activated Ca(2+)-like (CRAC)                          |
| Cyclin G2                                        | The eukaryotic May play a role in growth regulation and              |
| Serpine Family B Member 1                        | The protein ε Neutrophil serine protease inhibitor that              |
| Cyclin G1                                        | The eukaryotic May play a role in growth regulation. Is a            |
| Tripartite Motif Containing 21                   | This gene encodes an E3 ubiquitin-protein ligase whose activity      |
| T Cell Activation Inhibitor, Mitochondrial       | May regulate T-cell apoptosis.                                       |
| Zinc Finger Protein 385A                         | Zinc finger protein RNA-binding protein that affects the local       |
| Phospholipase A2 Group IVC                       | This gene encodes a Has a preference for arachidonic acid at         |
| Ninjurin 1                                       | The ninjurin family Homophilic cell adhesion molecule that           |
| RuvB Like AAA ATPase 1                           | This gene encodes a Possesses single-stranded DNA-stimulated         |
| Keratin 17                                       | This gene encodes a Type I keratin involved in the formation of      |
| HHIP Like 1                                      | This gene encodes a protein that belongs to the glucocorticoid       |
| Semaphorin 4B                                    | Inhibits axonal extension by providing local                         |
| Yippee Like 1                                    | This gene is involved in May play a role in epithelioid conversion   |
| Keratin 18                                       | KRT18 encoded Involved in the uptake of thrombin-antithrombin        |
| Astrotactin 2                                    | This gene encodes a Mediates recycling of the neuronal cell adhesion |
| Acid Phosphatase 7, Tartrate Sensitive           | Purple acid phosphatases (PAPs), including PAPL, are                 |
| Gelsolin                                         | The protein ε Calcium-regulated, actin-modulating protein            |
| Ly6/Neurotoxin 1                                 | This gene encodes an Acts in different tissues through interaction   |
| Myosin VIIA And Rab Interacting Protein          | Rab effector protein involved in melanosome                          |



Cytoglobin This gene encodes a protein that may have a protective function during cell death.

Zinc Finger Protein 521 Transcription factor that can both act as a transcription activator and repressor.

Syncoilin, Intermediate Filament Protein 1 This gene encodes an atypical type III intermediate filament (IF) protein.

Enoyl-CoA Hydratase And 3-Hydroxyacyl-CoA Synthase The protein is a peroxisomal trifunctional enzyme possessing three enzymatic activities: 3-hydroxyacyl-CoA synthase, enoyl-CoA hydratase, and 3-oxoacyl-CoA thiolase.

Eukaryotic Translation Elongation Factor 2 This gene encodes a protein that catalyzes the GTP-dependent ribosomal translocation during translation.

Signal Transducer And Activator Of Transcription 1 The protein is a signal transducer and transcription activator.

Charged Multivesicular Body Protein 1 This gene encodes a protein that is involved in the ESCRT machinery.

Family With Sequence Similarity 131 Member B

Zinc Finger Protein 185 With Zinc-Finger Protein 185 May be involved in the regulation of cell growth and differentiation.

Cytidine Deaminase This gene encodes an enzyme that scavenges exogenous and endogenous nucleosides.

Sulfide Quinone Oxidoreductase The protein is a cytochrome b5-dependent enzyme that catalyzes the oxidation of hydrogen sulfide to elemental sulfur.

Ubiquitin D Ubiquitin-like protein modifier which can target proteins for degradation by the proteasome.

Ephrin B1 The protein is a cell surface transmembrane ligand for Eph receptors.

Stanniocalcin 1 This gene encodes a protein that stimulates renal phosphate reabsorption.

MAM Domain Containing 2

Extracellular Leucine Rich Repeat And Fibronectin Type 3 Domain Protein 1 Inhibits phosphatase activity of protein tyrosine phosphatase SH-PTPase.

CD79b Molecule The B lymphocyte antigen receptor complex (BCR) associated protein required in cooperation with CD79A for B cell development.

ST13, Hsp70 Interacting Protein Pseudogene 3

DENN Domain Containing 2B This gene encodes a protein that may be involved in cytoskeletal organization.

Solute Carrier Family 27 Member 1 This gene encodes a protein that has acyl-CoA ligase activity for long-chain fatty acids.

Nuclear Paraspeckle Assembly Protein 1 This gene produces a long non-coding RNA (lncRNA) that is involved in nuclear paraspeckle assembly.

Zinc Finger Protein 789 May be involved in transcriptional regulation.

DnaJ Heat Shock Protein Family D Class B Member 1 The protein is a probable component of the PAM complex.

Phosphatidylinositol 3-OH Kinase Class I Alpha This gene is the most terminal protein-coding gene in the PI3K family.

Zinc Finger GRF-Type Containing Protein 1 The encoded protein contains GRF zinc finger (zf-GRF) domain.

Small Nucleolar RNA, H/ACA Box 33

Small Nucleolar RNA, C/D Box 100

FA Complementation Group E This gene encodes a DNA repair protein required for FANCD2 stability.

Small Nucleolar RNA, C/D Box 101

Solute Carrier Family 22 Member 31 Organic anion transporter that mediates the transport of various organic anions.

Ribosomal Protein L37 Pseudogene 2

DND MicroRNA-Mediated Repressor 1 This gene encodes an RNA-binding factor that positively regulates microRNA-mediated repression.

Glycerophosphodiester Phosphodiesterase Hydrolyzes lysoglycerophospholipids to glycerol and diacylglycerol.

Solute Carrier Organic Anion Transporter 1 This gene encodes a protein that may mediate the release of newly synthesized nucleolar proteins.

Nucleolar Protein 12 May bind to 28S rRNA.

Leucine Rich Single-Pass Membrane Protein 1

Zinc Finger Protein 121 May be involved in transcriptional regulation.

ATP Synthase F1 Subunit Epsilon Pseudogene Mitochondrial membrane ATP synthase subunit.

MicroRNA 4691                      microRNAs (miRNAs) are short (20-24 nt) non-coding  
 Derlin 3                              The protein ε Functional component of endoplasmic re  
 RNA, 7SL, Cytoplasmic 431, Pseudogene  
 Acetyl-CoA Acetyltransferase The product ε Involved in the biosynthetic pathway of c  
 Calcium Voltage-Gated Chan The protein ε Regulates the activity of L-type calcium ε  
 Small Nucleolar RNA Host Ge This gene represents a snoRNA host gene that produ  
 Ubiquitin Specific Peptidase 32 Pseudogene 1  
 POU Class 4 Homeobox 1      This gene en [Isoform 2]: Able to act as transcription f  
 Lysine Methyltransferase 2B   This gene en Histone methyltransferase that methylat  
 ArfGAP With GTPase Domain, Ankyrin Re Putative GTPase-activating protein.  
 Polycystin 1, Transient Receptor Potential Channel Interacting Pseudogene 6  
 Heat Shock Transcription Fac Heat-shock ti DNA-binding protein that specifically bin  
 NADH:Ubiquinone Oxidoredu The NADH-u Arginine hydroxylase involved in the ass  
 Membrane Palmitoylated Prot This gene product is a member of a family of membra  
 Adaptor Related Protein Com This gene en Part of the AP-3 complex, an adaptor-re  
 MicroRNA 1304                      microRNAs (miRNAs) are short (20-24 nt) non-coding  
 Ubiquitin Conjugating Enzyme E2 S Pseudogene 1  
 DGCR8 Microprocessor Com This gene en Component of the microprocessor comp  
 G Protein-Coupled Receptor ε GPR75 is a r G protein-coupled receptor that is activa  
 Glucose-Fructose Oxidoreductase Domain Containing 1  
 LDL Receptor Related Protein 5 Like  
 DNA Polymerase Epsilon, Ca This gene en Catalytic component of the DNA polyme  
 Fibroblast Growth Factor 12    The protein ε Involved in nervous system developmen  
 Nuclear Pore Complex Interacting Protein Family Member B11  
 Protein Tyrosine Phosphatase The protein ε May play roles in cilia formation and/or n  
 Sirtuin 7                              This gene en NAD-dependent protein-lysine deacylas  
 CCAAT Enhancer Binding Prc The protein ε Transcription activator that recognizes tv  
 Zinc Finger Protein 354B                      May be involved in transcriptional regula  
 Maternally Expressed 3                      This gene is a maternally expressed imprinted gene. I  
 SWI/SNF Related, Matrix Ass The protein ε Involved in transcriptional activation and  
 NADPH Dependent Diflavin C This gene en Component of the cytosolic iron-sulfur (f  
 TSPY Like 2                              This gene en Part of the CASK/TBR1/TSPYL2 transcr  
 Zinc Finger Protein 10                      The protein ε May be involved in transcriptional regula  
 Adhesion G Protein-Coupled ε This gene en Calcium-independent receptor of high af  
 Sperm Acrosome Associated 6                      Sperm protein potentially involved sperm  
 5'-Nucleotidase Domain Containing 3

Small Nuclear RNA Activating This gene en Part of the SNAPc complex required for

## Transmembrane And Coiled-Coil Domains 6

SFI1 Centrin Binding Protein Plays a role in the dynamic structure of c  
Smoothed, Frizzled Class F The protein ε G protein-coupled receptor that probably  
Small Nucleolar RNA, C/D Box 104

Serine And Arginine Rich Spli The protein ε Required for pre-mRNA splicing. Can als  
Ghrelin Opposite Strand/Antis This gene is an antisense gene of the ghrelin/obestati  
3-Hydroxy-3-Methylglutaryl-Cα HMG-CoA re Transmembrane glycoprotein that is the  
ERCC Excision Repair 6, Chr This gene en Essential factor involved in transcription-  
Adrenomedullin The protein ε AM and PAMP are potent hypotensive a

Small G Protein Signaling Mo The protein ε Possesses GTPase activator activity tow  
Mature T Cell Proliferation 1 This gene wε Enhances the phosphorylation and activ  
Leukotriene B4 Receptor Receptor for extracellular ATP > UTP ar  
Protein Kinase D1 The protein ε Serine/threonine-protein kinase that con

AFG3 Like Matrix AAA Peptidase Subunit 1, Pseudogene

ZNFX1 Antisense RNA 1 This gene represents a snoRNA host gene that produ  
Polycystin 1, Transient Receptor Potential Channel Interacting Pseudogene 1

Nuclear Receptor 2C2 Associated Protein May act as a repressor of NR2C2-media  
DAZ Interacting Zinc Finger Protein 1 Like Involved in primary cilium formation (Put  
X-Ray Repair Cross Comple This gene en Involved in the homologous recombinati  
X-Ray Repair Cross Comple This gene en Involved in the homologous recombinati  
Ubiquitin Conjugating Enzyme This gene en Accepts ubiquitin from the E1 complex a  
Integrator Complex Subunit 6 Like

Scavenger Receptor Class F | The protein ε Probable adhesion protein, which media  
Tubulin Tyrosine Ligase Like 3 Monoglycylase which modifies alpha- an  
Progesterin And AdipoQ Receptor Family Member 4

Serine And Arginine Rich Spli The protein ε Necessary for the splicing of pre-mRNA.

TBC1 Domain Family Membe This gene is . May act as a GTPase-activating protein

Cold Inducible RNA Binding Protein Cold-inducible mRNA binding protein the

WEE1 G2 Checkpoint Kinase This gene en Acts as a negative regulator of entry intc

Tubulin Epsilon And Delta Complex 2 Acts as a positive regulator of ciliary hec

Mevalonate Diphosphate Dec The enzyme Catalyzes the ATP dependent decarbox

GIN5 Complex Subunit 2 The yeast he The GINS complex plays an essential ro

Small Nuclear Ribonucleoprotein Polypeptide G Pseudogene 2

WD Repeat Domain 90 Required for efficient primary cilium form

Period Circadian Regulator 2 This gene is . Transcriptional repressor which forms a

Golgin A8 Family Member A The Golgi ap May be involved in maintaining Golgi str

Lin-7 Homolog B, Crumbs Cell Polarity Con Plays a role in establishing and maintain

Polypyrimidine Tract Binding I The protein ε RNA-binding protein which binds to intro

Chromobox 2 This gene en Component of a Polycomb group (PcG)  
 ELMO Domain Containing 1 Acts as a GTPase-activating protein (GAP)  
 Solute Carrier Family 5 Member 3 Prevents intracellular accumulation of histidine  
 G Protein-Coupled Receptor This gene en Is a receptor for the SMIM20 derived peptide  
 Deleted In Lymphocytic Leukemia This locus represents a microRNA host gene and also  
 KIAA0895 Like  
 Chloride Voltage-Gated Channel This gene en Chloride transport protein, initially identified in  
 Zinc Finger CCH-Type Containing 1 (Microbial infection) Binds to Japanese Encephalitis Virus  
 Ataxin 7 Like 2  
 FA Complementation Group A The Fanconi Anemia DNA repair protein that may operate in a  
 Centromere Protein T The centromere Component of the CENPA-NAC (nucleolar)  
 MicroRNA 3916 microRNAs (miRNAs) are short (20-24 nt) non-coding  
 Small Nucleolar RNA, H/ACA Box 25  
 CDC Like Kinase 2 This gene en Dual specificity kinase acting on both serine and threonine  
 MicroRNA 3682 microRNAs (miRNAs) are short (20-24 nt) non-coding  
 Ribosomal Protein L32 Pseudogene 3  
 Enhancer Of Zeste 2 Polycomb Target 1 This gene en Polycomb group (PcG) protein. Catalytic  
 Centrosomal Protein 152 This gene en Necessary for centrosome duplication; transcriptionally represses  
 MicroRNA 6845 microRNAs (miRNAs) are short (20-24 nt) non-coding  
 Inner Mitochondrial Membrane Protein 1 The mitochondrial membrane protein that catalyzes the removal of transit peptides  
 LIM And Calponin Homology Domains 1 Actin stress fibers-associated protein that is involved in  
 cell adhesion and cytoskeleton organization  
 Hes Family BHLH Transcription Factor 1 This gene en Does not bind DNA itself but suppresses  
 Hes Family BHLH Transcription Factor 2 This gene en Does not bind DNA itself but suppresses  
 NF-kappa-B Inhibitor Zeta This gene is involved in regulation of NF-kappa-B transcription  
 Lysine Methyltransferase 5C SUV420H2 a Histone methyltransferase that specifically methylates  
 Small Nucleolar RNA, H/ACA Box 4  
 Small Nucleolar RNA, H/ACA Box 41  
 Integrin Subunit Beta 1 Binding protein This gene en May play a role during maturation and/or  
 Ribosomal Protein L37 Pseudogene 23  
 Small Nucleolar RNA, C/D Box 96A  
 Scm Polycomb Group Protein Like 1 Putative Polycomb group (PcG) protein.  
 FOXD2 Adjacent Opposite Strand RNA 1  
 Adenosine Deaminase tRNA Specific 2 Probably participates in deamination of tRNA  
 Methionine Adenosyltransferase The protein encoded by this gene catalyzes the formation of S-adenosylmethionine  
 Zinc Finger Protein 625 May be involved in transcriptional regulation  
 Stearoyl-CoA Desaturase This gene en Stearoyl-CoA desaturase that utilizes O(2) and NADH  
 Small Nucleolar RNA, H/ACA Box 52

Methylsterol Monooxygenase Sterol-C4-me Catalyzes the three-step monooxygenat  
Cytochrome C Oxidase Subunit 7A2 Pseudogene 2

SATB Homeobox 1 This gene en Crucial silencing factor contributing to th  
Small Nucleolar RNA, C/D Box 2

Cytochrome C Oxidase Subunit 2 Cytochrome c Component of the cytochrome c oxidase  
Anti-Mullerian Hormone This gene en This glycoprotein, produced by the Sertoli

Coiled-Coil Domain Containing Protein 1 The product of this gene is a component of the deuterosome, a structure  
Small Nucleolar RNA Host Gene This locus represents a small nucleolar RNA host gene

Cryptochrome Circadian Regulator 1 This gene encodes a transcriptional repressor which forms a  
NPPA Antisense RNA 1

Mitogen-Activated Protein Kinase 1 Activation of Serine/threonine kinase which acts as a  
Translocase Of Inner Mitochondrial Membrane The mitochondrial intermembrane chaperone

Mitotic Spindle Organizing Protein 1 Required for gamma-tubulin complex recruitment  
Zinc Finger Protein 700 May be involved in transcriptional regulation

Eukaryotic Translation Initiation Factor 5A2 mRNA-binding protein involved in translation  
Period Circadian Regulator 1 This gene encodes a transcriptional repressor which forms a

Ubiquitin Associated Protein 1 Like

EP400 Pseudogene 1

Caspase 8 Associated Protein 1 This protein is involved in TNF-alpha-induced block  
Uracil DNA Glycosylase This gene encodes an enzyme that excises uracil residues from the DNA with

Histone Deacetylase 10 The protein encoded by this gene is polyamine deacetylase (PDAC), which is  
Mannosidase Alpha Class 2C Member 1 Cleaves alpha 1,2-, alpha 1,3-, and alpha 1,6-

Nuclear Pore Complex Interacting Protein Family Member A3

Heterogeneous Nuclear Ribonucleoprotein A This gene encodes a transcriptional regulator. Prom  
Prefoldin Subunit 4 This gene encodes a protein that binds specifically to cytosolic chaperonin

Colorectal Neoplasia Differentially Expressed Gene 1 This gene is transcribed into multiple transcript variants  
TATA-Box Binding Protein As Initiator of Transcription Component of the transcription factor Sp1

Zinc Finger Protein 684 May be involved in transcriptional regulation  
MDM4 Regulator Of P53 This gene encodes an inhibitor of p53/TP53- and TP73/p73-mediated

Cell Division Cycle Associated Protein 1 This gene encodes a protein that participates in MYC-mediated cell transfor  
Inositol Polyphosphate-5-Phosphatase The protein encoded by this gene is phosphatidylinositol (PtdIns) phosphatase

Mitogen-Activated Protein Kinase 2 This gene encodes a lymphotoxin beta-activated kinase which  
H2B Histone Pseudogene 2 Histones are basic nuclear proteins responsible for nucleosome

Meis Homeobox 2 This gene encodes a protein involved in transcriptional regulation. Bir  
SLX1B-SULT1A4 Readthrough This locus represents naturally occurring read-through

ATP Synthase Membrane Subunit DAPIT Mitochondrial membrane ATP synthase

Origin Recognition Complex 1 The origin recognition complex is a component of the origin recognition complex  
DnaJ Heat Shock Protein Family (Hsp40) Member G GTPase which can activate the MEK/ERK

RNA, U1 Small Nuclear 103, Pseudogene

C-Type Lectin Domain Family Natural killer (Microbial infection) Acts as a receptor for  
MicroRNA 93 microRNAs (miRNAs) are short (20-24 nt) non-coding

Zinc Finger And SCAN Domain This gene encodes May function as a transcription factor. M

WASP Family Homolog 2, Pseudogene Acts as a nucleation-promoting factor at  
Keratinocyte Associated Protein 3

NFKB Inhibitor Delta Regulates the expression of IL-2, IL-6, and  
Archaelysin Family Metallopeptidase 2 Pseudogene 1

ATPase Family AAA Domain The protein encoded May play a role in a mitochondrial network  
Fibronectin Type III And SPRY Domain Containing 1 Like

ATP Synthase Membrane Subunit DAPIT Pseudogene 1

GRB2 Associated Binding Protein The protein encoded Adapter protein that plays a role in intracellular  
Gamma-Aminobutyric Acid Receptor This gene encodes Component of a heterodimeric G-protein

CROCC Pseudogene 2

Zinc Finger Protein 117 This gene encodes May be involved in transcriptional regulation

Scleraxis BHLH Transcription Factor Plays an early essential role in mesoderm  
IQ Motif Containing C

Isopentenyl-Diphosphate Decarboxylase IDI1 encodes Catalyzes the 1,3-allylic rearrangement of  
SURP And G-Patch Domain This gene encodes May play a role in mRNA splicing.

TUB Bipartite Transcription Factor This gene encodes Functions in signal transduction from heterodimeric  
Potassium Voltage-Gated Channel This gene encodes Accessory potassium channel protein with

Divergent Protein Kinase Domain This gene encodes a member of the FAM69 family of  
CLK4 Associating Serine/Arginine Rich Protein Probably functions as an alternative splicing

Transmembrane Protein 200B

Cysteine Sulfinic Acid Decarboxylase This gene encodes Catalyzes the decarboxylation of L-asparagine

Long Intergenic Non-Protein Coding RNA 472

Rhotekin 2 May play an important role in lymphopoiesis

MicroRNA 6753 microRNAs (miRNAs) are short (20-24 nt) non-coding

Ribosomal Protein L37 Ribosomes, 80S Binds to the 23S rRNA.

MIS12 Kinetochores Complex Component Part of the MIS12 complex which is required for

Phospholipase A2 Group IVA This gene encodes Has primarily calcium-dependent phospholipase

Ribosomal Protein L21 Ribosomes, 80S Component of the large ribosomal subunit

Progesterone And AdipoQ Receptor Family Member Plasma membrane progesterone (P4) receptor

Major Facilitator Superfamily I The protein encoded Sodium-dependent lysophosphatidylcholine

Chymotrypsin Like This gene encodes a serine-type endopeptidase with

MSS51 Mitochondrial Translational Activator

ADP-Ribosyltransferase 4 (Dc) This gene encodes a protein that contains a mono-ADP-ribosylation

Crystallin Gamma S Crystallins are Crystallins are the dominant structural components of the

Leucine Rich Repeat Containing 17      Involved in bone homeostasis. Acts as a  
MIR22 Host Gene

TATA-Box Binding Protein As TAF1D is a n Component of the transcription factor Sl  
ATPase Family AAA Domain Containing 5      Involved in DNA damage response. Invc  
Protein Kinase Domain Containing, Cytopla Secreted tyrosine-protein kinase that me  
SET Domain Containing 6, Pr This gene en Protein-lysine N-methyltransferase. Mon  
TLC Domain Containing 5

Cryptochrome Circadian Regl This gene en Transcriptional repressor which forms a  
FAST Kinase Domains 3      This gene en Required for normal mitochondrial respir  
Killer Cell Lectin Like Receptc Natural killer Plays an inhibitory role on natural killer (  
Docking Protein 3      DOK proteins are enzymatically inert ad

Polycystin 1, Transient Recep This gene en Component of a heteromeric calcium-pe  
Potassium Channel Tetramerization Domai Substrate-specific adapter of a BCR (BT  
Thymosin Beta 15a      Plays an important role in the organizati

RELT TNF Receptor      The protein ε May play a role in apoptosis (PubMed:2

TEN1-CDK3 Readthrough (NI This locus represents naturally occurring read-through  
GULP PTB Domain Containin The protein ε May function as an adapter protein. Req

Ribosomal Protein S28      Ribosomes, the organelles that catalyze protein synth

Zinc Finger MYND-Type Cont ZMYND19 is May be involved as a regulatory molecul  
Coronin 6

StAR Related Lipid Transfer [Cholesterol h Involved in the intracellular transport of c  
ATPase Plasma Membrane C The protein ε Catalyzes the hydrolysis of ATP couplec

Unc-119 Lipid Binding Chapei This gene is : Involved in synaptic functions in photore  
RNA, 5S Ribosomal Pseudogene 383

Chromosome 1 Open Reading Frame 54

Growth Arrest Specific 5      This gene produces a spliced long non-coding RNA a

Rap Guanine Nucleotide Exchange Factor Probable guanine nucleotide exchange l  
ArfGAP With GTPase Domain, Ankyrin Re; Putative GTPase-activating protein.

Firre Intergenic Repeating RN This gene produces a long RNA containing a repeatin

BolA Family Member 3      This gene en Acts as a mitochondrial iron-sulfur (Fe-S  
Small Nucleolar RNA, C/D Box 11

Family With Sequence Similarity 118 Member A

Family With Sequence Similarity 76 Member B

DEAD/H-Box Helicase 11      DEAD box pr (Microbial infection) Required for bovine

Rogdi Atypical Leucine Zipper This gene encodes a protein of unknown function. Lo:  
Small Nucleolar RNA, H/ACA Box 32

GABPB1 Antisense RNA 1

C1D Nuclear Receptor Corep The protein ε Plays a role in the recruitment of the RN

Ribosomal Biogenesis Factor Trans-acting factor in ribosome biogenesis

RNA Binding Motif Protein 14 This gene encodes Isoform 1 may function as a nuclear receptor

Small Nucleolar RNA, C/D Box 6

Amino acid aminotransferase This gene encodes Transaminase with broad substrate specificity

Small Nucleolar RNA, H/ACA Box 16A

Small Nucleolar RNA, C/D Box 5

EGF Like Domain Multiple 7 This gene encodes Regulates vascular tubulogenesis in vivo

ATP Synthase F1 Subunit epsilon This gene encodes Mitochondrial membrane ATP synthase

Pre-mRNA Processing Factor 39 Involved in pre-mRNA splicing.

Dachshund Family Transcription Factor This gene encodes Transcription factor that is involved in repressing

Coiled-Coil Domain Containing 189

RAS Guanyl Releasing Protein The protein epsilon Guanine nucleotide exchange factor (GEF)

Small Nucleolar RNA, C/D Box 23

Small Nucleolar RNA, C/D Box 50B SNORD50B is a C/D box-type small nucleolar RNA (snoRNA)

Small Nucleolar RNA, C/D Box 62B

C-X9-C Motif Containing 2 May be involved in cytochrome c oxidase

Small Nucleolar RNA, C/D Box 17

MicroRNA Let-7d microRNAs (miRNAs) are short (20-24 nt) non-coding

Small Nucleolar RNA, C/D Box 45C

C9orf72-SMCR8 Complex Subunit The protein epsilon [Isoform 1]: Regulates stress granule assembly

Double PHD Fingers 1 May have an important role in development

TMSB4X Pseudogene 4

ATPase Phospholipid Transporter The P-type ATPase Catalytic component of a P4-ATPase family

Zinc Finger Protein 467 The protein epsilon Transcription factor that promotes adipogenesis

MicroRNA 2116 microRNAs (miRNAs) are short (20-24 nt) non-coding

Myb/SANT DNA Binding Domain Containing 2

Centrosomal AT-AC Splicing Factor This gene encodes a protein thought to contain a coiled-coil

MicroRNA 4321 microRNAs (miRNAs) are short (20-24 nt) non-coding

Small Nucleolar RNA, C/D Box 22

Gonadotropin Releasing Hormone This gene encodes Stimulates the secretion of gonadotropin

Proline Rich 22

Small Nucleolar RNA, C/D Box 26

Small Nucleolar RNA, C/D Box 27

Small Nucleolar RNA, C/D Box 28

ArfGAP With GTPase Domain, Ankyrin Repeat Putative GTPase-activating protein.

MicroRNA 3176 microRNAs (miRNAs) are short (20-24 nt) non-coding

Small Nucleolar RNA, C/D Box 30

Ubiquitin Conjugating Enzyme The protein epsilon Accepts ubiquitin from the E1 complex and



Chaperonin Containing TCP1 Subunit 6 Pseudogene 3

High Mobility Group Nucleosome The protein  $\epsilon$  Binds to nucleosomes, regulating chromatin structure

Zinc Finger Protein 714 May be involved in transcriptional regulation

A-Kinase Anchoring Protein 1 This locus encodes a splice factor regulating alternative splicing

Maternally Expressed 9

GRB10 Interacting GYF Protein This gene encodes a protein that may act cooperatively with GRB10 to regulate signaling pathways

Nuclear Pore Complex Interacting Protein Family Member B5

NBPF Member 14 This gene is a member of the neuroblastoma breakpoint family

Stearoyl-CoA Desaturase Pseudogene 1

Cytochrome P450 Family 1 Subfamily C A cytochrome P450 monooxygenase involved in steroid metabolism

Small Nucleolar RNA Host Gene This gene produces a long RNA that is overexpressed in cancer

COMM Domain Containing 8 The protein  $\epsilon$  May modulate activity of cullin-RING E3 ubiquitin ligase

G Protein-Coupled Receptor 135 Orphan receptor. Has spontaneous activity

BCL2 Like 2 This gene encodes a protein that promotes cell survival. Blocks dexamethasone-induced apoptosis

Jagged Canonical Notch Ligand The Notch signaling pathway ligand involved in the development of the nervous system

MicroRNA 5587 microRNAs (miRNAs) are short (20-24 nt) non-coding RNA molecules that regulate gene expression

Maestro Heat Like Repeat Family Member 6

Cholinergic Receptor Nicotinic Alpha 10 Subunit Ionotropic receptor with a probable role in the development of the nervous system

DM1 Protein Kinase The protein  $\epsilon$  Non-receptor serine/threonine protein kinase

Ubiquitin Specific Peptidase 37 Deubiquitinase that antagonizes the activity of ubiquitin ligase

Chaperonin Containing TCP1 Subunit 6 Pseudogene 1

Cache Domain Containing 1 May regulate voltage-dependent calcium channel activity

Small Nucleolar RNA, H/ACA Box 73A

Engulfment And Cell Motility 3 The protein  $\epsilon$  Involved in cytoskeletal rearrangements

Arginine And Serine Rich Protein 1

LON Peptidase N-Terminal Domain And Ring Finger 1

Small Nucleolar RNA, C/D Box 32A

Integrin Subunit Alpha E Integrins are heterodimers of alpha and beta subunits. Integrin alpha-E/beta-7 is a receptor for heparan sulfate

Multiple C2 And Transmembrane Domain C Calcium sensor which is essential for the function of the Geminin DNA Replication Inhibitor This gene encodes a protein that inhibits DNA replication by preventing the function of cyclin L2

Cyclin L2 The protein  $\epsilon$  Involved in pre-mRNA splicing. May induce alternative splicing

Small Nucleolar RNA, C/D Box 35A

Small Nucleolar RNA, C/D Box 14A

MicroRNA 21 microRNAs (miRNAs) are short (20-24 nt) non-coding RNA molecules that regulate gene expression

Pyridoxal Phosphatase Pyridoxal 5-pyridoxal 5-phosphate protein serine phosphatase that dephosphorylates pyridoxal 5-phosphate

Small Nucleolar RNA, C/D Box 84

Golgi Transport 1B May be involved in fusion of ER-derived vesicles with Golgi apparatus

Presequence Translocase As This gene encodes a protein that regulates ATP-dependent protein translocation

Small Nucleolar RNA, C/D Box 88A

Small Nucleolar RNA, C/D Box 88B

Small Nucleolar RNA Host Gene 3

Small Nucleolar RNA, C/D Box 86

Small Nucleolar RNA, H/ACA Small nucleolar RNAs (snoRNAs) are small noncoding

Small Nucleolar RNA, H/ACA Box 27

Discs Large MAGUK Scaffold This gene encodes a postsynaptic scaffolding protein that plays a role in the regulation of neurotransmission.

Gamma-Aminobutyric Acid Tyrosine Aminotransferase The product of this gene is GABA, the major inhibitory neurotransmitter in the central nervous system.

Abhydrolase Domain Containing Protein This gene encodes a phospholipase that may play a role in platelet activation.

SEC61 Translocon Subunit G The Sec61 complex is a component of the SEC61 channel-forming translocon in the endoplasmic reticulum.

Distal-Less Homeobox 1 This gene encodes a transcriptional activator.

Small Nucleolar RNA, H/ACA Box 61

Small Nucleolar RNA, H/ACA Box 53

Small Nucleolar RNA, H/ACA Box 48

MicroRNA 25 microRNAs (miRNAs) are short (20-24 nt) non-coding RNA molecules that regulate gene expression.

Small Nucleolar RNA, C/D Box 110

Small Nucleolar RNA, C/D Box 10

Small Nucleolar RNA, C/D Box 99

RecQ Like Helicase 4 The protein is a DNA-dependent ATPase. May modulate DNA replication and repair.

RAD54 Like The protein is involved in DNA repair and mitotic recombination.

Small Nucleolar RNA, H/ACA Box 51

Small Nucleolar RNA, H/ACA Box 44

AarF Domain Containing Kinase 5 The function of this protein is not yet clear.

Protein Phosphatase 1 Regulatory Subunit Acts as a glycogen-targeting subunit for protein phosphatase 1.

Succinate Dehydrogenase Complex Flavoprotein Subunit A Pseudogene 1

Small Nucleolar RNA, H/ACA Box 70

Interleukin 20 Receptor Subunit IL20RB and IL20RA The IL20RA/IL20RB dimer is a receptor for interleukin 20.

Small Nucleolar RNA, H/ACA Box 40

Centromere Protein V Required for distribution of pericentromeric heterochromatin.

Small Nucleolar RNA, H/ACA This gene encodes a member of the family of box AC small nucleolar RNAs.

Small VCP Interacting Protein Endoplasmic reticulum-associated degradation (ERA1) domain containing protein.

Small Nucleolar RNA, H/ACA Box 71B

Hect Domain And RLD 2 Pseudogene 4

Small Nucleolar RNA, C/D Box 4A

Small Nucleolar RNA, H/ACA Box 62

Small Nucleolar RNA, H/ACA Box 24

Thiosulfate Sulfurtransferase Like Domain Thiosulfate:glutathione sulfurtransferase

Small Nucleolar RNA, H/ACA Box 31

Small Nucleolar RNA, C/D Box 102

Small Nucleolar RNA, H/ACA Box 73B

Small Nucleolar RNA, C/D Box 65

Ubiquitin Conjugating Enzyme E2 S Pseudogene 2

24-Dehydrocholesterol Reduc This gene en Catalyzes the reduction of the delta-24 c

FTX Transcript, XIST Regulat This gene is located upstream of XIST, within the X-in

Small Nucleolar RNA, H/ACA Box 18

Peptidylprolyl Isomerase E Li This transcribed pseudogene is related to PPIE (Gene

Small Nucleolar RNA, H/ACA Box 2A

Solute Carrier Family 49 Member 3

EP300 Interacting Inhibitor Of Differentiatio Acts as a repressor of nuclear receptor-  
Small Nucleolar RNA, H/ACA Box 1

Poly(ADP-Ribose) Polymerase Family Memr Mono-ADP-ribosyltransferase that medic

Sprouty RTK Signaling Antagonist 1 Inhibits fibroblast growth factor (FGF)-in

Transmembrane Protein 50B

Chromosome 14 Open Reading Frame 132

Small Nucleolar RNA, C/D Box 36C

TEF Transcription Factor, PAI This gene en Transcription factor that binds to and tra

Cyclin L1 Involved in pre-mRNA splicing. Function

Small Nucleolar RNA, C/D Box 36A

Hyperpolarization Activated C This gene en Hyperpolarization-activated potassium c

Monocyte To Macrophage Dif This protein i Involved in the dynamics of lysosomal m

Small Nucleolar RNA, C/D Box 45B

Small Nucleolar RNA, C/D Box 45A

Small Cajal Body-Specific RN This gene produces a small nuclear RNA that localize

Golgin A8 Family Member H

FRAS1 Related Extracellular I This gene en Extracellular matrix protein which may pl

Translocase Of Inner Mitochondrial Membr: May participate in the translocation of tra

Small Nucleolar RNA, C/D Bo Intronic regions of ribosomal protein genes can harbo

Small Nucleolar RNA, C/D Box 49A

NPTN Intronic Transcript 1

Small Nucleolar RNA Host Gene 4

Protein Disulfide Isomerase F This gene en Acts as an intracellular estrogen-binding

Nuclear Receptor Subfamily 2 The protein ε Coup (chicken ovalbumin upstream pror

Protocadherin 7 This gene belongs to the protocadherin gene family, ε

Small Nucleolar RNA, C/D Box 58C

Small Nucleolar RNA, C/D Box 56

Small Nucleolar RNA, C/D Box 57

Protocadherin 9 This gene encodes Potential calcium-dependent cell-adhesion molecules  
 Zinc Finger SWIM-Type Containing 5  
 Small Nucleolar RNA, C/D Box 54  
 Small Nucleolar RNA, H/ACA Box 57  
 Small Nucleolar RNA, C/D Box 58A  
 Small Nucleolar RNA, H/ACA Box 64  
 Microtubule Associated Protein 11 Microtubule associated protein which see  
 Zinc Finger Protein 169 May be involved in transcriptional regulation  
 Methylthioribose-1-Phosphate This enzyme Catalyzes the interconversion of methylthioribose-1-phosphate and methylthioribose-5-phosphate  
 Oligosaccharyltransferase Complex Non-C: Subunit of the oligosaccharyl transferase complex  
 MicroRNA 589 microRNAs (miRNAs) are short (20-24 nt) non-coding RNA molecules  
 MicroRNA 590 microRNAs (miRNAs) are short (20-24 nt) non-coding RNA molecules  
 Capping Actin Protein Of Mus The protein epsilon F-actin-capping proteins bind in a calcium-dependent manner to the barbed ends of actin filaments  
 Lymphocyte Antigen 6 Family LY6G5B belongs to a cluster of leukocyte antigen-6 (L6) genes  
 Unc-51 Like Kinase 3 Serine/threonine protein kinase that acts as a tumor suppressor  
 Family With Sequence Similarity 117 Member A  
 ABRA C-Terminal Like  
 Small Nucleolar RNA, C/D Box 12B  
 Leukocyte Receptor Cluster Member 8  
 Diacylglycerol Kinase Delta This gene encodes Isoform 2 may be involved in cell growth and differentiation  
 Collagen Triple Helix Repeat (This locus encodes a cluster of collagen triple helix repeat domain genes)  
 Valyl-tRNA Synthetase 2, Mit This gene encodes a mitochondrial aminoacyl-tRNA synthetase  
 SET And MYND Domain Containing 4  
 SS18L1 Subunit Of BAF Chromosome 17 This gene encodes Transcriptional activator which is required for BAF complex formation  
 Ribosomal Protein S15a Pseudogene 24  
 Protease Associated Domain Containing 1 Plays a role in the modulation of physical contact between cells  
 Family With Sequence Similarity 219 Member B  
 Notch 2 N-Terminal Like A Human-specific protein that promotes neuronal cell death  
 Solute Carrier Family 25 Member SLC25A33 b Mitochondrial transporter that imports/exported various metabolites  
 Synapse Defective Rho GTPase The protein epsilon GTPase activator for the Rho-type GTPase  
 Small Nucleolar RNA, C/D Box 68  
 Eukaryotic Translation Elongation Factor 2 This gene encodes Positive modulator of ATM response to DNA damage  
 Coiled-Coil Domain Containing 130  
 Small Nucleolar RNA, H/ACA Box 13  
 Membrane Bound O-Acyltransferase This gene encodes Acyltransferase which mediates the conversion of long-chain fatty acids to long-chain fatty acyl-CoA  
 PAXX Non-Homologous End Joining The protein epsilon Involved in non-homologous end joining  
 Small Nucleolar RNA, H/ACA Box 8  
 BTB Domain Containing 19

Kinesin Family Member 1C The protein ε Motor required for the retrograde transp  
 Aquaporin 7 Pseudogene 1  
 Transmembrane Protein 100 Plays a role during embryonic arterial en  
 Zinc Finger GATA Like Protein 1 Transcriptional regulator that plays a key  
 E2F Transcription Factor 1 The protein ε Transcription activator that binds DNA c  
 Leukocyte Receptor Tyrosine The protein ε Receptor with a tyrosine-protein kinase :  
 Calcium Voltage-Gated Chan The protein ε Regulatory subunit of L-type calcium cha  
 Small Nucleolar RNA, C/D Box 15B  
 Cell Division Cycle 14A The protein ε Dual-specificity phosphatase. Required i  
 Parathyroid Hormone Like Ho The protein ε Neuroendocrine peptide which is a critic  
 Coiled-Coil Domain Containing 17  
 Centrosomal Protein 85 This gene en Acts as a negative regulator of NEK2 to  
 Hydroxyacylglutathione Hydrolase Like Hydrolase acting on ester bonds.  
 Inactivation Escape 1 X chromosome inactivation provides dosage compens  
 NGFI-A Binding Protein 2 This gene en Acts as a transcriptional repressor for zii  
 LIM Domain 7 This gene encodes a protein containing a calponin ho  
 Zinc Finger Protein 841 May be involved in transcriptional regula  
 NDUFA4 Mitochondrial Comp The protein ε Component of the cytochrome c oxidase  
 Solute Carrier Family 43 Mem SLC43A1 be Sodium-independent, high affinity transp  
 Cell Growth Regulator With Ring Finger Do Able to inhibit growth in several cell lines  
 Zinc Finger Protein 431 This gene en Sequence-specific DNA binding transcrip  
 Defective In Cullin Neddylation 1 Domain C Potently stimulates the neddylation of cu  
 Metastasis Associated Lung A This gene produces a precursor transcript from which  
 MBNL1 Antisense RNA 1  
 Pleckstrin Homology And Rhc The protein ε May be a transforming oncogene with ex  
 RNA, 7SL, Cytoplasmic 81, Pseudogene  
 Small Nucleolar RNA, H/ACA Box 6  
 Small Nucleolar RNA, H/ACA Box 10  
 MT-RNR2 Like 12 Plays a role as a neuroprotective and ar  
 Leucine Rich Repeat Containing 70 Renders cells highly sensitive to the acti  
 Kinesin Family Member C2 May play a role in microtubule-dependen  
 Immunoglobulin Lambda Variable 5-52 V region of the variable domain of immu  
 Tetraspanin 13 The protein encoded by this gene is a member of the  
 EPH Receptor A5 This gene be Receptor tyrosine kinase which binds pr  
 PAS Domain Containing Serir This gene en Serine/threonine-protein kinase involved  
 Dynein Light Chain LC8-Type Cytoplasmic Acts as one of several non-catalytic acc  
 Synaptotagmin Like 4 This gene en Modulates exocytosis of dense-core gra  
 Ribosomal Protein L37a Pseudogene 1

Mir-100-Let-7a-2-Mir-125b-1 ( This gene produces long non-coding RNAs that act as G Protein-Coupled Receptor (This gene is Orphan receptor with constitutive G(s) signaling)

Lecithin-Cholesterol Acyltransferase This gene encodes a central enzyme in the extracellular metabolism of lipids

Striatin Interacting Protein 2 Plays a role in the regulation of cell morphology

Chondroitin Sulfate Synthase CSS3 is a glycosyltransferase that has both beta-1,3-glucuronic acid and beta-1,6-glucosyltransferase activities

Tonsoku Like, DNA Repair Protein The protein encoded by this gene is a component of the MMS22L-TONSL complex

Caprin Family Member 2 The protein encoded by this gene promotes phosphorylation of the Wnt coreceptor

Copine 7 This gene encodes a calcium-dependent phospholipid-binding protein

Cyclin T2 The protein encoded by this gene (Microbial infection) promotes transcription of the

RAD9 Checkpoint Clamp Complex This gene product is a component of the 9-1-1 cell-cycle checkpoint complex

Hydroxysteroid 17-Beta Dehydrogenase 7 Pseudogene 2

Solute Carrier Family 30 Member 3 Involved in accumulation of zinc in synaptic vesicles

Solute Carrier Family 17 Member 1 This gene encodes a protein involved in vesicular storage and exocytosis

NSF Attachment Protein Beta This gene encodes a protein required for vesicular transport between Golgi apparatus and lysosomes

Zinc Finger And BTB Domain Protein This gene is a transcriptional repressor (PubMed)

C-X-C Motif Chemokine Ligand This antimicrobial protein has chemotactic activity for neutrophils.

Zinc Finger Protein 141 The protein encoded by this gene may be involved in transcriptional regulation

OTU Deubiquitinase 3 Deubiquitinating enzyme that hydrolyzes ubiquitin

Small Nucleolar RNA, C/D Box 10 Intronic regions of ribosomal protein genes can harbor small nucleolar RNA (snoRNA) genes

Biogenesis Of Lysosomal Organellar Membranes This gene encodes a component of the BLOC-1 complex, a complex involved in the biogenesis of lysosomal organelles

Zinc Finger Protein 335 The protein encoded by this gene is a component or associated component of the

Lymphocyte Activating Protein 3 Lymphocyte- [Secreted lymphocyte activation gene 3 protein]

Trafficking Kinesin Protein 2 May regulate endosome-to-lysosome trafficking

Phospholipid Phosphatase 4 Magnesium-independent phospholipid phosphatase

CKLF Like MARVEL Transmembrane Protein This gene belongs to the chemokine-like factor gene family

Solute Carrier Family 26 Member 1 This gene belongs to the SLC26 family [Isoform 4]: Apical membrane chloride/bicarbonate exchanger

Small Nucleolar RNA, C/D Box 14B

Natural Killer Cell Triggering Factor This gene encodes a PPIase that catalyzes the cis-trans isomerization of

Testis Expressed 30

Phosphatidylinositol 4-Kinase Alpha Pseudogene 1

Adiponectin Receptor 2 The adiponectin receptor for ADIPOQ, an essential hormone

Nuclear Pore Complex Interacting Protein Pseudogene 1

Tudor Domain Containing 10

Nebulette This gene encodes a protein that binds to actin and plays an important role in cell motility

Small Nucleolar RNA, C/D Box 46

Small Nucleolar RNA, C/D Box 38B

Small Nucleolar RNA, C/D Box 38A

Endogenous Bornavirus Like Nucleoprotein May act as an RNA-binding protein. The

Valosin Containing Protein Lysine Methyltransferase that  
 Growth Factor Receptor Bound Adapter Protein which modulates coupling  
 Ephrin B2 This gene encodes (Microbial infection) Acts as a receptor for  
 Coiled-Coil Domain Containing 144A  
 RPL24 Pseudogene 2  
 Uveal Autoantigen With Coiled-Coil This gene encodes Modulates isoactin dynamics to regulate  
 ArfGAP With Coiled-Coil, Ankyrin Repeat A GTPase-activating protein for the ADP-ribosylated  
 MicroRNA 4292 microRNAs (miRNAs) are short (20-24 nt) non-coding  
 Transmembrane Protein 37 Thought to stabilize the calcium channel  
 Ribosomal Protein S10 Pseudogene 3  
 CREB/ATF BZIP Transcription Factor Strongly activates transcription when bound to  
 Neuropeptide FF-Amide Peptide This gene encodes Morphine modulating peptides. Have wide  
 Zinc Finger Protein 333 May be involved in transcriptional regulation  
 Arginine And Glutamate Rich 1 Required for the estrogen-dependent expression  
 Adhesion G Protein-Coupled Receptor This gene encodes Calcium-independent receptor of low affinity  
 Keratin 10 This gene encodes (Microbial infection) Acts as a mediator of  
 CD58 Molecule This gene encodes Ligand of the T-lymphocyte CD2 glycoprotein  
 ABR Activator Of Rho GEF Ankyrin This gene encodes Protein with a unique structure having two  
 Acetylcholinesterase (Cartwright) Acetylcholine Terminates signal transduction at the neuromuscular  
 Actinin Alpha 1 Alpha actinin F-actin cross-linking protein which is the major  
 Adenosine Deaminase This gene encodes Catalyzes the hydrolytic deamination of adenosine  
 Adaptor Related Protein Component The protein encoded by this gene is a component of the adaptor protein complex  
 Alanine Aminopeptidase, Membrane Type 1 (Microbial infection) Acts as a receptor for  
 Annexin A3 This gene encodes Inhibitor of phospholipase A2, also possible  
 Amyloid Beta Precursor Protein The protein encoded by this gene may modulate the internalization of amyloid  
 Shroom Family Member 2 This gene encodes May be involved in endothelial cell morphology  
 Arginase 2 Arginase catalyzes May play a role in the regulation of extracellular matrix  
 Rho GTPase Activating Protein Rho GTPase GTPase-activating protein for Rho family  
 Arylsulfatase D The protein encoded by this gene is a member of the  
 Arylsulfatase L Arylsulfatase May be essential for the correct composition  
 BTB Domain And CNC Homeobox Protein This gene encodes Transcriptional regulator that acts as repressor  
 BCL2 Related Protein A1 This gene encodes Retards apoptosis induced by IL-3 deprivation  
 PR/SET Domain 1 This gene encodes Transcription factor that mediates a transcriptional  
 BMX Non-Receptor Tyrosine Kinase This gene encodes Non-receptor tyrosine kinase that plays a role  
 BCL2 Family Apoptosis Regulator The protein encoded by this gene (Isoform 1): Apoptosis regulator that functions  
 ZFP36 Ring Finger Protein Like This gene is a Zinc-finger RNA-binding protein that decreases  
 Bone Marrow Stromal Cell Ankyrin Bone marrow Synthesizes the second messengers cyclic  
 Caldesmon 1 This gene encodes Actin- and myosin-binding protein implicated in

|                                                |                                                                                                                                                        |
|------------------------------------------------|--------------------------------------------------------------------------------------------------------------------------------------------------------|
| Capping Actin Protein, Gelsolin                | This gene encodes Calcium-sensitive protein which reversibly                                                                                           |
| Calpain 2                                      | The calpains Calcium-regulated non-lysosomal thiol-proteinases                                                                                         |
| Caspase 3                                      | The protein encoded by this gene is involved in the activation cascade of caspases                                                                     |
| Caveolin 1                                     | The scaffolding protein encoded by this gene may act as a scaffolding protein within caveolae                                                          |
| Calicin                                        | The protein encoded by this gene is a possible morphogenetic cytoskeletal element                                                                      |
| CD34 Molecule                                  | The protein encoded by this gene is a possible adhesion molecule with a role in hematopoiesis                                                          |
| Scavenger Receptor Class B Type 1              | The protein encoded by this gene (Microbial infection) Acts as a receptor for lipopolysaccharide                                                       |
| Ectonucleoside Triphosphate Phosphohydrolase 1 | The protein encoded by this gene is in the nervous system, could hydrolyze extracellular nucleotides                                                   |
| CD44 Molecule (Indian Blood Group Antigen)     | The protein encoded by this gene is a cell-surface receptor that plays a role in cell-cell interactions                                                |
| CD74 Molecule                                  | The protein encoded by this gene is a Class-II-associated invariant chain peptidase                                                                    |
| LPS Responsive Beige-Like A                    | The protein encoded by this gene may be involved in coupling signal transduction to the cytoskeleton                                                   |
| Cadherin 2                                     | This gene encodes Calcium-dependent cell adhesion protein                                                                                              |
| Cadherin 5                                     | This gene encodes Cadherins are calcium-dependent cell adhesion molecules                                                                              |
| Cadherin 11                                    | This gene encodes Cadherins are calcium-dependent cell adhesion molecules                                                                              |
| Cadherin 13                                    | This gene encodes Cadherins are calcium-dependent cell adhesion molecules                                                                              |
| Cholinergic Receptor Nicotinic                 | The muscle-specific acetylcholine receptor encoded by this gene After binding acetylcholine, the AChR releases calcium from the sarcoplasmic reticulum |
| Tripeptidyl Peptidase 1                        | This gene encodes Lysosomal serine protease with tripeptidase activity                                                                                 |
| Collagen Type IV Alpha 5 Chain                 | This gene encodes Type IV collagen is the major structural component of basement membranes                                                             |
| Collagen Type IV Alpha 6 Chain                 | This gene encodes Type IV collagen is the major structural component of basement membranes                                                             |
| Collagen Type V Alpha 2 Chain                  | This gene encodes Type V collagen is a member of group I collagen                                                                                      |
| Collagen Type XII Alpha 1 Chain                | This gene encodes Type XII collagen interacts with type I collagen                                                                                     |
| Activating Transcription Factor 1              | The protein encoded by this gene is a transcriptional factor that acts in the differentiation of T cells                                               |
| Colony Stimulating Factor 1                    | The protein encoded by this gene is a cytokine that plays an essential role in the differentiation of T cells                                          |
| Cysteine And Glycine Rich Protein              | This gene encodes Could play a role in neuronal development                                                                                            |
| Cathepsin B                                    | This gene encodes Thiol protease which is believed to participate in the degradation of macromolecules                                                 |
| Cathepsin K                                    | The protein encoded by this gene is a thiol protease involved in osteoclastic bone resorption                                                          |
| Cathepsin O                                    | The protein encoded by this gene is a proteolytic enzyme possibly involved in the degradation of macromolecules                                        |
| CXADR Ig-Like Cell Adhesion Molecule 1         | The protein encoded by this gene (Microbial infection) Acts as a receptor for lipopolysaccharide                                                       |
| CYLD Lysine 63 Deubiquitinase                  | This gene is a Deubiquitinase that specifically cleaves ubiquitin                                                                                      |
| Death Associated Protein Kinase 1              | Death-associated serine/threonine kinase which is involved in apoptosis                                                                                |
| DEAD-Box Helicase 1                            | DEAD box protein (Microbial infection) Required for Coronavirus replication                                                                            |
| Dual Specificity Phosphatase 1                 | The protein encoded by this gene regulates mitogenic signal transduction                                                                               |
| Dual Specificity Phosphatase 2                 | The protein encoded by this gene is a dual specificity protein phosphatase; activates protein tyrosine phosphatase                                     |
| Dual Specificity Phosphatase 3                 | The protein encoded by this gene has phosphatase activity with synthetic substrates                                                                    |
| Endothelin Converting Enzyme                   | The protein encoded by this gene converts big endothelin-1 to endothelin-1                                                                             |
| Sphingosine-1-Phosphate Receptor 1             | This gene encodes Receptor for the lysosphingolipid sphingosine-1-phosphate                                                                            |
| Dematin Actin Binding Protein                  | The protein encoded by this gene is a membrane-cytoskeleton-associated protein                                                                         |
| EPH Receptor B2                                | This gene encodes Receptor tyrosine kinase which binds phosphatidylinositol 3-OH phosphate                                                             |



ETS Proto-Oncogene 2, Transcription Factor 1 This gene encodes a transcription factor activating transcription of ETS target genes.

ETS Variant Transcription Factor 1 This gene encodes a transcriptional activator that binds to DNA and activates transcription of ETS target genes.

Exostosin Like Glycosyltransferase 1 This gene encodes a glycosyltransferase which regulates the expression of the E2F2 receptor.

F2R Like Trypsin Receptor 1 This gene encodes a receptor for trypsin and trypsin-like enzymes.

Fibroblast Activation Protein A The protein encoded by this gene is a cell surface glycoprotein serine protease that plays an essential role in cell adhesion and migration.

FAT Atypical Cadherin 1 This gene is a member of the FAT family of cell surface glycoproteins. It plays an essential role for cellular polarity and is involved in the regulation of cell division.

Fructose-Bisphosphatase 1 Fructose-1,6-bisphosphatase catalyzes the hydrolysis of fructose 1,6-bisphosphate to fructose 6-phosphate and phosphate.

FKBP Prolyl Isomerase 1A The protein encoded by this gene keeps in an inactive conformation until it is bound to cyclosporin A (CsA).

Filamin B This gene encodes a protein that connects cell membrane constituents to the cytoskeleton.

Filamin C This gene encodes muscle-specific filamin, which plays a central role in the organization of the cytoskeleton in muscle cells.

Fms Related Receptor Tyrosine Kinase 1 This gene encodes a tyrosine-protein kinase that acts as a cell surface receptor for the Fms ligand.

FYN Proto-Oncogene, Src Family Tyrosine Kinase This gene is a non-receptor tyrosine-protein kinase that has been implicated in the regulation of cell growth and differentiation.

Guanidinoacetate N-Methyltransferase The protein encoded by this gene converts guanidinoacetate to creatine, a major energy storage molecule in muscle.

Growth Arrest Specific 6 This gene encodes a protein that is induced during cell cycle arrest. It can bridge virus entry and cell cycle arrest.

Guanylate Binding Protein 1 Guanylate binding protein hydrolyzes GTP to GMP in 2 consecutive steps.

Guanylate Binding Protein 2 This gene encodes a protein that hydrolyzes GTP to GMP in 2 consecutive steps.

GTP Cyclohydrolase I Feedback Inhibitor of Methylenetetrahydrofolate Synthase This gene encodes a protein that mediates tetrahydrobiopterin inhibition of methylenetetrahydrofolate synthase.

Gamma-Glutamyltransferase The enzyme encoded by this gene cleaves the gamma-glutamyl bond of peptides and proteins.

Glycine Receptor Beta This gene encodes a subunit of glycine receptors, which are ligand-gated chloride channels.

GM2 Ganglioside Activator This gene encodes a protein that is involved in the activation of GM2 ganglioside.

G Protein Subunit Alpha 12 This gene encodes a guanine nucleotide-binding protein (G protein) subunit alpha 12.

G Protein Subunit Alpha I2 The protein encoded by this gene [isoform sGi2] regulates the cell surface expression of G protein-coupled receptors.

G Protein-Coupled Receptor 1 This gene encodes a serine/threonine kinase that phosphorylates G protein-coupled receptors.

G Protein Pathway Suppressor 1 This gene encodes a protein that is required for efficient G protein signaling.

General Transcription Factor III Pseudogene 1 This is a pseudogene of the general transcription factor III family.

Glycophorin C (Gerbich Blood Group) Glycophorin C This protein is a minor sialoglycoprotein on the surface of red blood cells.

Serpin Family D Member 1 This gene encodes a serpin that is involved in the regulation of cell growth and differentiation.

H2.0 Like Homeobox Transcription Factor 1 This gene encodes a transcription factor required for TBX21/Brachyury expression.

High Mobility Group AT-Hook 1 This gene encodes a protein that binds preferentially to the minor groove of DNA.

Forkhead Box A1 This gene encodes a transcription factor that is involved in the regulation of cell growth and differentiation.

Histamine N-Methyltransferase In mammals, histamine N-methyltransferase inactivates histamine by N-methylation.

DnaJ Heat Shock Protein Family D Class B Member 1 This gene encodes a co-chaperone for HSPA8/Hsc70.

Tenascin C This gene encodes an extracellular matrix protein implicated in cell adhesion and migration.

Immunoglobulin Binding Protein 1 The protein encoded by this gene is associated to surface IgM-receptor; may be involved in the regulation of B cell development.

Interleukin 15 The protein encoded by this gene is a cytokine that stimulates the proliferation and differentiation of T cells.

Integrin Subunit Alpha 6 The gene encodes integrin alpha-6/beta-1 (ITGA6:ITGB1) is a member of the integrin family.

Interferon Regulatory Factor 2 IRF2 encodes a transcription factor that specifically binds to the upstream regulatory region of interferon-responsive genes.

Interferon Stimulated Exonuclease Gene 2 This gene encodes an interferon-induced antiviral exonuclease that degrades viral RNA.

JunD Proto-Oncogene, AP-1 The protein ε Transcription factor binding AP-1 sites.  
 Potassium Inwardly Rectifying This gene en Inward rectifying potassium channel that  
 Kinesin Family Member 3C Microtubule-based anterograde transloc  
 Laminin Subunit Alpha 3 The protein ε Binding to cells via a high affinity recept  
 Laminin Subunit Alpha 4 Laminins, a f Binding to cells via a high affinity recept  
 Laminin Subunit Gamma 1 Laminins, a f Binding to cells via a high affinity recept  
 Galectin 9 The galectins [Isoform 2]: Acts as an eosinophil chem  
 Fatty Acid Desaturase 3 The protein ε Acts as a methyl-end fatty acyl coenzym  
 Von Willebrand Factor A Domain Containin May play a role in tumorigenesis as a tu  
 Lysyl Oxidase This gene en Responsible for the post-translational ox  
 Lysyl Oxidase Like 1 This gene en Active on elastin and collagen substrate:  
 Lysyl Oxidase Like 2 This gene en Mediates the post-translational oxidative  
 LIM Domain Containing Prefe This gene en May play a structural role at sites of cell  
 LDL Receptor Related Proteir This gene en Molecular chaperone for LDL receptor-r  
 Lymphotoxin Beta Lymphotoxin Cytokine that binds to LTBR/TNFRSF3.  
 Lactotransferrin This gene is [Isoform DeltaLf]: transcription factor wit  
 SMAD Family Member 1 The protein ε Transcriptional modulator activated by B  
 Melanoma Cell Adhesion Molecule Plays a role in cell adhesion, and in coh  
 Myocyte Enhancer Factor 2D This gene is . Transcriptional activator which binds spe  
 MET Proto-Oncogene, Recep This gene en (Microbial infection) Acts as a receptor fr  
 Microfibril Associated Protein Microfibrillar- Component of the elastin-associated mi  
 MLLT3 Super Elongation Complex Subunit Chromatin reader component of the sup  
 Matrix Metallopeptidase 1 This gene en Cleaves collagens of types I, II, and III a  
 Matrix Metallopeptidase 10 This gene en Can degrade fibronectin, gelatins of type  
 Matrix Metallopeptidase 11 Proteins of th May play an important role in the progre  
 Matrix Metallopeptidase 15 This gene en Endopeptidase that degrades various cc  
 Matrix Metallopeptidase 19 This gene en Endopeptidase that degrades various cc  
 CD200 Molecule This gene en Costimulates T-cell proliferation. May re  
 Mannose Receptor C-Type 1 The recogniti (Microbial infection) Acts as a receptor fr  
 Methionine Sulfoxide Reductæ This gene en Has an important function as a repair en  
 MAX Interactor 1, Dimerizatio Expression o Transcriptional repressor. MXI1 binds wi  
 NFKB Inhibitor Epsilon The protein ε Inhibits NF-kappa-B by complexing with  
 Neuronal PAS Domain Proteii The protein ε Transcriptional activator which forms a c  
 Neurogranin Neurogranin Acts as a 'third messenger' substrate of  
 5'-Nucleotidase Ecto The protein ε Hydrolyzes extracellular nucleotides into  
 Receptor Tyrosine Kinase Lik This gene en Has very low kinase activity in vitro and i  
 G Protein-Coupled Receptor This gene en Receptor for tyrosine, L-DOPA and dopæ  
 2'-5'-Oligoadenylate Syntheta This gene is Interferon-induced, dsRNA-activated ani

**P21 (RAC1) Activated Kinase** The protein ε Serine/threonine protein kinase that play  
**Peptidylglycine Alpha-Amidati** This gene en Bifunctional enzyme that catalyzes the p  
**Phosphodiesterase 2A** [Isoform PDE2A2]: Regulates mitochonc  
**Pyruvate Dehydrogenase Kin**: The pyruvate Inhibits pyruvate dehydrogenase activity  
**Platelet And Endothelial Cell /** The protein ε [Isoform Delta15]: Does not protect agai  
**ATPase Phospholipid Transp**: This gene en Catalytic component of a P4-ATPase fliq  
**6-Phosphofructo-2-Kinase/Fru** The protein ε Synthesis and degradation of fructose 2  
**Phosphate Regulating Endop**: The protein ε Peptidase that cleaves SIBLING (small i  
**Procollagen-Lysine,2-Oxoglut** The protein ε Forms hydroxylysine residues in -Xaa-Ly  
**Plastin 3** Plastins are ε Actin-bundling protein found in intestinal  
**Phospholipid Transfer Protein** The protein ε Mediates the transfer of phospholipids a  
**Plexin B1** Receptor for SEMA4D (PubMed:198435  
**Protein Phosphatase 2 Regul**: This gene en The B regulatory subunit might modulate  
**Proteasome 20S Subunit Bet**: The proteasc The proteasome is a multicatalytic prote  
**Quiescin Sulfhydryl Oxidase 1** This gene en Catalyzes the oxidation of sulfhydryl gro  
**Protein Tyrosine Phosphatase** The protein ε Isoform 1 and isoform 2 act as a negativ  
**Protein Tyrosine Phosphatase** The protein ε Possible cell adhesion receptor. It posse  
**Protein Tyrosine Phosphatase** The protein ε Involved in cell-cell adhesion through ho  
**Protein Tyrosine Phosphatase** The protein ε Cell surface receptor that binds to glyco:  
**Rac Family Small GTPase 2** This gene en Plasma membrane-associated small GT  
**RAS Like Proto-Oncogene A** The product ε Multifunctional GTPase involved in a var  
**Ras Protein Specific Guanine** RAS GTPase Functions as a calcium-regulated nuclec  
**Sortilin 1** This gene en Functions as a sorting receptor in the G  
**S100 Calcium Binding Protein** The protein ε Binds both calcium and zinc. May be inv  
**C-C Motif Chemokine Ligand** This gene is ε Acts as a ligand for C-C chemokine rece  
**C-C Motif Chemokine Ligand** This gene en Chemotactic factor that attracts monocy  
**C-C Motif Chemokine Ligand** This antimicr Acts as a ligand for C-C chemokine rece  
**C-X-C Motif Chemokine Ligan** The protein ε Chemotactic for neutrophil granulocytes  
**C-X3-C Motif Chemokine Liga** This gene be Acts as a ligand for both CX3CR1 and ir  
**Selectin P Ligand** This gene en (Microbial infection) Acts as a receptor fr  
**Secreted Frizzled Related Prc** This gene en Soluble frizzled-related proteins (sFRPS  
**ST6 Beta-Galactoside Alpha-**: This gene en Transfers sialic acid from CMP-sialic aci  
**Fascin Actin-Bundling Protein** This gene en Actin-binding protein that contains 2 maj  
**Superoxide Dismutase 2** This gene is ε Destroys superoxide anion radicals whic  
**SRY-Box Transcription Factor** Members of ε Transcription factor that binds to DNA at  
**SPARC (Osteonectin), Cwcv** / This gene en May play a role in cell-cell and cell-matri  
**Spectrin Beta, Non-Erythrocyt** Spectrins are Probably plays an important role in neur  
**SRC Proto-Oncogene, Non-R** This gene is ε Non-receptor protein tyrosine kinase wh

Supervillin This gene encodes [Isoform 1]: Forms a high-affinity link between TAP and MHC class II molecules.

TAP Binding Protein This gene encodes a protein involved in the association of MHC class II molecules with invariant chain (Ii).

TIMP Metalloproteinase Inhibitor This gene encodes a protein that complexes with metalloproteinases (such as MMP-1, MMP-2, MMP-3, MMP-7, MMP-9, MMP-13, MMP-14, MMP-15, MMP-16, MMP-17, MMP-19, MMP-20, MMP-21, MMP-23, MMP-24, MMP-25, MMP-26, MMP-27, MMP-28, MMP-29, MMP-30, MMP-31, MMP-32, MMP-33, MMP-34, MMP-35, MMP-36, MMP-37, MMP-38, MMP-39, MMP-40, MMP-41, MMP-42, MMP-43, MMP-44, MMP-45, MMP-46, MMP-47, MMP-48, MMP-49, MMP-50, MMP-51, MMP-52, MMP-53, MMP-54, MMP-55, MMP-56, MMP-57, MMP-58, MMP-59, MMP-60, MMP-61, MMP-62, MMP-63, MMP-64, MMP-65, MMP-66, MMP-67, MMP-68, MMP-69, MMP-70, MMP-71, MMP-72, MMP-73, MMP-74, MMP-75, MMP-76, MMP-77, MMP-78, MMP-79, MMP-80, MMP-81, MMP-82, MMP-83, MMP-84, MMP-85, MMP-86, MMP-87, MMP-88, MMP-89, MMP-90, MMP-91, MMP-92, MMP-93, MMP-94, MMP-95, MMP-96, MMP-97, MMP-98, MMP-99, MMP-100) and inhibits their activity.

TLE Family Member 4, Transcriptional Corepressor This gene encodes a transcriptional corepressor that binds to a variety of transcription factors.

G Protein-Coupled Receptor 137B This gene encodes a G protein-coupled receptor that acts also as a negative regulator of osteoclast differentiation.

Claudin 5 This gene encodes a protein that plays a major role in tight junction-specific cell-cell interactions.

TNF Alpha Induced Protein 1 This gene encodes a substrate-specific adapter of a BCR (B cell receptor).

TNF Receptor Associated Factor 1 This gene encodes an adapter molecule that regulates the activation of NF- $\kappa$ B.

TNF Receptor Associated Factor 2 This gene encodes an adapter molecule that regulates the activation of NF- $\kappa$ B.

TNF Receptor Associated Factor 3 This gene encodes an adapter protein and signal transducer that regulates the activation of NF- $\kappa$ B.

Ubiquitin Like Modifier Activator 1 This gene encodes a protein that activates ubiquitin by first adenylating with E1.

Ubiquitin Conjugating Enzyme 1 This gene encodes a protein that accepts ubiquitin from the E1 complex and transfers it to the substrate.

UDP-Glucose Ceramide Glucosyltransferase This gene encodes an enzyme that catalyzes the transfer of glucose from UDP-glucose to ceramide at the cytosolic surface of the plasma membrane.

Utrophin This gene encodes a protein that may play a role in anchoring the cytoskeleton to the cell membrane.

Vimentin This gene encodes a protein involved with LARP6 in the stabilization of mRNA.

Very Low Density Lipoprotein Receptor This gene encodes a receptor that binds VLDL and transports it into cells.

CAP-Gly Domain Containing Protein 1 This gene encodes a protein that seems to link microtubules to dendritic spines.

Wnt Family Member 9A This gene encodes a ligand for members of the frizzled family of receptors.

Xg Glycoprotein (Xg Blood Group Antigen) This gene encodes the XG blood group antigen, and is involved in cell-cell interactions.

Zinc Finger AN1-Type Containing 5 This gene encodes a protein involved in protein degradation via the ubiquitin-proteasome pathway.

Dynein Axonemal Light Intermediate Chain 1 This gene encodes a protein that may play a dynamic role in flagellar motility.

Lysosomal Protein Transmembrane Protein 1 This gene encodes a protein that may have a special functional role during lysosomal maturation.

Peroxidasin This gene encodes a protein that displays low peroxidase activity and is involved in the regulation of gene expression.

Nuclear Receptor Interacting Protein 1 This gene encodes a protein that modulates transcriptional activation by steroid hormones.

CDC42 Binding Protein Kinase This gene encodes a serine/threonine-protein kinase which is involved in the regulation of cell growth and differentiation.

Semaphorin 7A (John Milton) This gene encodes a protein that plays an important role in integrin-mediated cell adhesion.

Serine Protease 12 This gene encodes a protein that plays a role in neuronal plasticity and the regulation of gene expression.

Contactin Associated Protein 1 This gene encodes a protein that is required, with CNTNAP2, for radial glial cell development.

Nipsnap Homolog 1 This gene encodes a member of the NipSnap family of proteins.

Eukaryotic Translation Initiation Factor 3 Subunit 1 This gene encodes a component of the eukaryotic translation initiation complex.

ATP Binding Cassette Subfamily B Member 1 This gene encodes a protein that may act as an inducible transporter in the plasma membrane.

ADAM Metalloproteinase Domain 1 This gene encodes a protein that participates in the proteolytic processing of various substrates.

RNA Guanine-7 Methyltransferase This gene encodes the catalytic subunit of the mRNA-capping enzyme.

TNF Superfamily Member 10 This gene encodes a cytokine that binds to TNFRSF10A/TRA1.

TNF Receptor Superfamily Member 1 This gene encodes a decoy receptor that can neutralize the activity of TNF.

TNF Receptor Superfamily Member 2 This gene encodes a receptor for the cytotoxic ligand TNFSF10.

Fibroblast Growth Factor 16 This gene encodes a protein that plays an important role in the regulation of cell growth and differentiation.

IQ Motif Containing GTPase 1 This gene encodes a protein that plays a crucial role in regulating the dynamics of the cytoskeleton.

ArfGAP With SH3 Domain, Ar This gene en Activates the small GTPases ARF1, ARI  
 ST3 Beta-Galactoside Alpha-; Ganglioside ( Catalyzes the formation of ganglioside C  
 Sequestosome 1 This gene en Autophagy receptor required for selectiv  
 Eukaryotic Translation Initiatic This gene en Catalyzes the exchange of eukaryotic in  
 Cyclin A1 The protein ε May be involved in the control of the cell  
 RAB29, Member RAS Oncogene Family The small GTPases Rab are key regulat  
 Kalirin RhoGEF Kinase Huntington's Promotes the exchange of GDP by GTP  
 Proline-Serine-Threonine Pho This gene en Involved in regulation of the actin cytosk  
 Solute Carrier Family 16 Member 4 Proton-linked monocarboxylate transpor  
 Synaptogyrin 3 This gene en May play a role in regulated exocytosis.  
 Dual Specificity Tyrosine Pho: This gene en Dual-specificity kinase which possesses  
 Membrane Associated Guany The protein ε May play a role as scaffolding protein at  
 DLG Associated Protein 1 Part of the postsynaptic scaffold in neur  
 Dehydrogenase/Reductase 3 Short-chain c Catalyzes the reduction of all-trans-retin  
 Neuronal Regeneration Related Protein May have roles in neural function. Ectop  
 Transforming Growth Factor E This gene en Plays a role in the TGF-beta/activin sign  
 N-Myristoyltransferase 2 This gene en Adds a myristoyl group to the N-terminal  
 Leupaxin The product ; Transcriptional coactivator for androgen  
 Tight Junction Protein 2 This gene en Plays a role in tight junctions and adhere  
 Chromodomain Y Like Chromodom; [Isoform 1]: Not able to recognize and bi  
 Carbohydrate Sulfotransferas This locus er Sulfotransferase that utilizes 3'-phospho  
 Mitogen-Activated Protein Kin The protein ε Serine/threonine kinase that may play a  
 Homer Scaffold Protein 3 This gene en Postsynaptic density scaffolding protein.  
 Mitogen-Activated Protein Kin This gene en The JNK-interacting protein (JIP) group  
 ADAM Metallopeptidase With This gene en Cleaves aggrecan, a cartilage proteogly  
 CAMP Responsive Element B The product ; Binds to the cAMP response element an  
 Synuclein Alpha Interacting P This gene en Isoform 2 inhibits the ubiquitin ligase act  
 SH3 And PX Domains 2A Adapter protein involved in invadopodia  
 GRIP And Coiled-Coil Domair The protein ε Golgin which probably tethers transport  
 Deducator Of Cytokinesis 4 This gene is ; [Isoform 2]: Has a higher guanine nucle  
 Leucine Zipper Tumor Suppressor Family M May be involved in promoting the matur  
 MTSS I-BAR Domain Containing 1 May be related to cancer progression or  
 Secernin 1 This gene lik; Regulates exocytosis in mast cells. Incre  
 RAB GTPase Activating Protein 1 Like GTP-hydrolysis activating protein (GAP)  
 TRAF Family Member Associ; The TRAF (t Adapter protein involved in I-kappa-B-kir  
 BCL2 Like 11 The protein ε Induces apoptosis and anoikis. Isoform l  
 SH2 Domain Containing 3C This gene en [Isoform 1]: Important regulator of chem  
 Protein Tyrosine Phosphatas; The protein ε Tyrosine-protein phosphatase which dep

## ATPase Phospholipid Transporting 9A (Putative)

|                                           |                                                      |                                               |
|-------------------------------------------|------------------------------------------------------|-----------------------------------------------|
| Transducer Of ERBB2, 1                    | This gene en                                         | Anti-proliferative protein; the function is i |
| WASP Family Member 2                      | This gene en                                         | Downstream effector molecule involved         |
| Toll Like Receptor 6                      | The protein ε                                        | Participates in the innate immune respo       |
| Semaphorin 3A                             | This gene is                                         | Involved in the development of the olfac      |
| Butyrophilin Subfamily 3 Mem              | The butyroph                                         | Plays a role in T-cell responses in the ac    |
| Brain Abundant Membrane At                | This gene encodes a membrane bound protein with s    |                                               |
| Cyclase Associated Actin Cyt              | This gene wε                                         | May have a regulatory bifunctional role.      |
| Vesicle Amine Transport 1                 | Synaptic ves                                         | Possesses ATPase activity (By similarity      |
| Semaphorin 6B                             | This gene en                                         | May play a role in both peripheral and cε     |
| Dihydropyrimidinase Like 4                |                                                      | Necessary for signaling by class 3 sema       |
| CDC42 Effector Protein 3                  | This gene en                                         | Probably involved in the organization of      |
| Tripartite Motif Containing 16            | The protein ε                                        | E3 ubiquitin ligase that plays an essent      |
| Podoplanin                                | This gene en                                         | Mediates effects on cell migration and a      |
| KH RNA Binding Domain Con                 | This gene en                                         | Isoform 3, which is expressed in growth-      |
| GRB2 Related Adaptor Protei               | This gene en                                         | Couples signals from receptor and cytop       |
| Lysine Demethylase 5B                     | This gene en                                         | Histone demethylase that demethylates         |
| SHH Signaling And Ciliogene               | This gene en                                         | Plays a role in the establishment of cell     |
| Proline Rich Nuclear Receptor Coactivator |                                                      | Nuclear receptor coactivator. May play a      |
| Acyl-CoA Thioesterase 2                   | This gene en                                         | Acyl-CoA thioesterases are a group of e       |
| Butyrophilin Subfamily 3 Mem              | The butyroph                                         | Plays a role in T-cell activation and in th   |
| Calpain 11                                | Calpains con                                         | Calcium-regulated non-lysosomal thiol-p       |
| ADAM Metallopeptidase With                | The protein ε                                        | Metalloprotease that may play a role in t     |
| A-Kinase Anchoring Protein 2              |                                                      | Binds to regulatory subunit (RII) of prote    |
| Ring Finger Protein 24                    | This gene en                                         | May play a role in TRPCs intracellular tr     |
| Nidogen 2                                 | This gene en                                         | Cell adhesion glycoprotein which is wide      |
| RAS P21 Protein Activator 3               | This gene en                                         | Inhibitory regulator of the Ras-cyclic AM     |
| Pleckstrin Homology Like Dor              | This gene en                                         | Seems to be involved in regulation of ap      |
| Ring Finger Protein 44                    | The protein encoded by this gene contains a RING fir |                                               |
| DLG Associated Protein 4                  | The product                                          | May play a role in the molecular organiz      |
| SEC31 Homolog A, COPII Co                 | The protein ε                                        | Component of the coat protein complex         |
| MLX Interacting Protein                   | This gene en                                         | Binds DNA as a heterodimer with MLX ε         |
| Trafficking Kinesin Protein 1             |                                                      | Involved in the regulation of endosome-t      |
| CD93 Molecule                             | The protein ε                                        | Receptor (or element of a larger recepto      |
| Transmembrane And Coiled-Coil Domain F    |                                                      | Endoplasmic reticulum membrane prote          |
| Lysine Demethylase 4B                     |                                                      | Histone demethylase that specifically de      |
| Sterile Alpha Motif Domain Cc             | Sterile alpha                                        | Acts as a translational repressor of SRE      |
| Paternally Expressed 10                   | This is a patε                                       | Prevents apoptosis in hepatocellular car      |

Rho GTPase Activating Protein Interaction of GTPase-activating protein for RHOA and TGF-Beta Activated Kinase 1 The protein is Adapter linking MAP3K7/TAK1 and TRAF3

TBC1 Domain Family Member 9 May act as a GTPase-activating protein

Lipin 1 This gene encodes Plays important roles in controlling the membrane lipid composition

Ral Guanine Nucleotide Dissociation Stimulator 1 Probable guanine nucleotide exchange factor

F-Box And Leucine Rich Repeats Containing Protein 1 This gene encodes Substrate recognition component of a SCF E3 ubiquitin ligase

Transmembrane Protein 131 Like [Isoform 1]: Membrane-associated form

Zinc Finger CCCH-Type Containing Protein 1 This gene encodes May be a specific regulator of miRNA biogenesis

IQ Motif Containing E Component of the EJC complex that promotes pre-mRNA splicing

SMG6 Nonsense Mediated Decay Protein 1 This gene encodes Component of the telomerase ribonucleoprotein complex

G Protein-Coupled Receptor 1 The protein is Key negative regulator of Shh signaling, inhibits the Shh receptor

SEC14 Like Lipid Binding 2 This gene encodes Carrier protein. Binds to some hydrophobic ligands

RNA Binding Fox-1 Homolog 1 This gene is RNA-binding protein that regulates alternative splicing

Single Stranded DNA Binding Protein 3 May be involved in transcription regulation

Plexin B2 Members of the plexin family

Fibronectin Leucine Rich Transmembrane Protein 1 This gene encodes Functions in cell-cell adhesion, cell migration

Pannexin 1 The protein is Structural component of the gap junction channel

KIAA1549 Like

6-Phosphogluconolactonase Hydrolysis of 6-phosphogluconolactone

Glutaminyl-Peptide Cyclotransferase This gene encodes Responsible for the biosynthesis of pyroglutamate

Beta-Secretase 2 This gene encodes Responsible for the proteolytic processing of APP

ABI Family Member 3 Binding Protein

Transmembrane Protein 158 Constitutive active Receptor for brain injury-derived neurotrophic factor

SAM And HD Domain Containing Protein 1 This gene encodes Protein that acts both as a host restriction factor and a transcription factor

Adhesion G Protein-Coupled Receptor A2 Endothelial receptor which functions together with GPR124

C2 Calcium Dependent Domain Containing 2

Sushi, Nidogen And EGF Like Domains 1

Leucine Rich Repeats And Immunoglobulin Like Domain Containing Protein 1 Acts as a feedback negative regulator of the Wnt signaling pathway

Transmembrane Protein 98 This gene encodes Functions as a negative regulator of MYD88

Oxysterol Binding Protein Like This gene encodes Phosphoinositide-binding protein which binds to oxysterols

WD Repeat Domain, Phosphatidylinositol Transfer Protein [Isoform 4]: Recruits the ATG12-ATG5-ATG13 complex

Phosphatidylinositol Transfer Protein This gene encodes Phosphatidylinositol transfer proteins mediate the transfer of phospholipids between membranes

Regulator Of G Protein Signaling 1 This gene encodes Regulates G protein-coupled receptor signaling

Myeloma Overexpressed

HMG-Box Transcription Factor 1 Transcriptional repressor that binds to the HMG-box

Syndecan Binding Protein 2 The protein is Binds phosphatidylinositol 4,5-bisphosphate

Dickkopf WNT Signaling Pathway Inhibitor 1 This gene encodes Antagonizes canonical Wnt signaling by inhibiting the Wnt receptor

G Protein-Coupled Receptor 1 This gene encodes Orphan receptor.

TNF Receptor Superfamily Member 1 This gene encodes a member of the TNF receptor superfamily that promotes apoptosis, possibly via a pathway involving caspases.

Regulator Of Cell Cycle This gene is involved in the regulation of the cell cycle. It encodes a protein that modulates the activity of cell cycle-specific transcription factors.

PYD And CARD Domain Containing 1 This gene encodes a protein that functions as a key mediator in apoptosis. It contains a PYD domain and a CARD domain.

Dermatan Sulfate Epimerase The protein encoded by this gene converts D-glucuronic acid to L-iduronic acid, a process essential for the synthesis of dermatan sulfate.

NOP53 Ribosome Biogenesis Factor Nucleolar protein which is involved in the regulation of ribosome biogenesis. It is an ATP- and membrane-binding protein that interacts with the 19S subunit of the proteasome.

EH Domain Containing 4 This gene encodes a protein that is involved in the regulation of cell growth and differentiation. It contains four EH domains.

NADPH Oxidase 4 This gene encodes a subunit of the NADPH oxidase complex. [Isoform 4]: Involved in redox signaling in response to oxidative stress.

Podocalyxin Like 2 This gene is involved in the regulation of cell-cell interactions. It acts as a ligand for vascular selectins. It encodes a protein that is a member of the podocalyxin-like protein family.

ArfGAP With SH3 Domain, ArfGAP1 This gene encodes a protein that possesses phosphatidylinositol 4,5-bisphosphate 3-phosphatase activity. It is a neural cell adhesion molecule.

Neurotrimin This gene encodes a protein that is a neural cell adhesion molecule. It is involved in the regulation of cell growth and differentiation.

SH3 And Multiple Ankyrin Repeat Domain Containing 2 This gene encodes a protein that seems to be an adapter protein in the regulation of cell growth and differentiation. It contains two SH3 domains and multiple ankyrin repeats.

HD Domain Containing 2 This gene encodes a protein that catalyzes the dephosphorylation of the hydroxyl group of serine and threonine residues.

Pleckstrin Homology Domain Containing 1 This gene encodes a protein that plays a role in the regulation of the actin cytoskeleton. It contains one pleckstrin homology domain.

Zinc Finger Protein 219 This gene is involved in the regulation of gene expression. It encodes a transcriptional regulator (PubMed:1462).

Receptor Accessory Protein 2 This gene encodes a protein that is required for endoplasmic reticulum (ER) chaperone function. It is an androgen-induced protein.

Androgen Induced 1 This gene encodes a protein that hydrolyzes bioactive fatty-acid esters of phospholipids. It is a calcium-permeable, non-selective cation channel.

Transient Receptor Potential (TRP) Channel Subfamily 1 Member 9 This gene encodes a protein that is involved in endocytosis and intracellular signaling. It is a member of the TRP channel subfamily 1.

Sorting Nexin 9 This gene encodes a protein that is involved in endocytosis and intracellular signaling. It is a member of the sorting nexin family.

RAB6B, Member RAS Oncogene Family This gene encodes a protein that seems to have a role in retrograde membrane trafficking. It is a member of the RAS oncogene family.

Dehydrogenase/Reductase 7 This gene encodes a member of the short-chain dehydrogenase/reductase family. It is involved in the metabolism of various substrates.

Acyl-CoA Synthetase Long Chain Fatty Acid This gene encodes a protein that catalyzes the conversion of long-chain fatty acids to acyl-CoA. It is involved in the regulation of gene expression.

G Protein-Coupled Receptor (GPCR) Class C Group 1 Member 1 This gene encodes a protein that is involved in the regulation of gene expression. It is a retinoic acid-inducible G-protein-coupled receptor.

Polypeptide N-Acetylgalactosyltransferase This gene encodes a glycopeptide transferase involved in the synthesis of N-glycans. It is involved in the regulation of cell growth and differentiation.

Interleukin 17D The protein encoded by this gene induces expression of IL6, CXCL8/IL8, and other pro-inflammatory cytokines. It is a member of the interleukin 17 family.

Zinc Finger FYVE-Type Containing 1 This gene encodes a protein that plays a role in the formation of lipid droplets. It contains one zinc finger FYVE-type domain.

Solute Carrier Family 37 Member 1 This gene encodes a protein that is involved in the regulation of gene expression. It is a member of the solute carrier family 37.

Gamma-Secretase Activating Regulator of gamma-secretase activity, 1 This gene encodes a protein that is involved in the regulation of gene expression. It is a member of the gamma-secretase activating regulator family.

Sialic Acid Acetyltransferase This gene encodes a protein that catalyzes the removal of O-acetyl ester groups from sialic acid. It is involved in the regulation of cell growth and differentiation.

Ras And Rab Interactor 2 The RAB5 protein is a Ras effector protein. May function as an effector of Ras and Rab5. It is involved in the regulation of cell growth and differentiation.

Ras Homolog Family Member F, Filopodia This gene encodes a protein that is involved in the regulation of cell growth and differentiation. It is a member of the Ras homolog family member F.

DNA Damage Inducible Transcript 4 This gene encodes a protein that regulates cell growth, proliferation and differentiation. It is a member of the DNA damage inducible transcript 4 family.

Egl-9 Family Hypoxia Inducible Protein 1 This gene encodes a protein that is a cellular oxygen sensor that catalyzes, with HIF-1, the hydroxylation of HIF-1. It is a member of the Egl-9 family.

Transmembrane Protein 132 This gene encodes a protein that may play a role in embryonic and postnatal development. It is a member of the transmembrane protein 132 family.

Zinc Finger And SCAN Domain Containing 1 This gene encodes a protein that may be involved in transcriptional regulation. It contains one zinc finger and SCAN domain.

Ecto-NOX Disulfide-Thiol Exchange Protein 1 This gene encodes a protein that probably acts as a terminal oxidase of phospholipids. It is a member of the ecto-NOX disulfide-thiol exchange protein 1 family.

Ral GEF With PH Domain And SH3 Binding Domain This gene encodes a protein that is a guanine nucleotide exchange factor for Ral. It is involved in the regulation of cell growth and differentiation.

Retroelement Silencing Factor 1 This gene encodes a protein that plays a role in the regulation of imprinting. It is a member of the retroelement silencing factor 1 family.

Leucine Rich Repeat Containing 20 This gene encodes a protein that is involved in the regulation of cell growth and differentiation. It contains 20 leucine rich repeats.



FGGY Carbohydrate Kinase [ This gene encodes a protein that phosphorylates cart  
 La Ribonucleoprotein 6, Translational Regu Regulates the coordinated translation of  
 Transmembrane Protein 63B Acts as an osmosensitive calcium-perme  
 DEAD-Box Helicase 43 The protein encoded by this gene is an ATP-depende  
 RNA Binding Motif Protein 38 (Microbial infection) Essential factor for t  
 Deducator Of Cytokinesis 10 This gene en Guanine nucleotide-exchange factor (Gf  
 TBC1 Domain Family Member 22B May act as a GTPase-activating protein  
 Breast Carcinoma Amplified Sequence 4  
 Rho Guanine Nucleotide Excl This gene en May act as a guanine nucleotide exchan  
 NECAP Endocytosis Associat This gene lik Involved in endocytosis.  
 Fatty Acyl-CoA Reductase 2 This gene be Catalyzes the reduction of saturated but  
 Protocadherin Gamma Subfal This gene is Potential calcium-dependent cell-adhesi  
 Protocadherin Gamma Subfal This gene is Potential calcium-dependent cell-adhesi  
 Gasdermin C The N-terminal moiety promotes pyroptc  
 KIAA1217 Required for normal development of inte  
 Transcription Elongation Factor A Like 7 Plays a role in the negative regulation of  
 Latexin This gene en Hardly reversible, non-competitive, and |  
 CEA Cell Adhesion Molecule 19  
 Reticulon 4 This gene be [Isoform A]: Developmental neurite grow  
 Endoplasmic Reticulum-Golgi This gene en Possible role in transport between endo|  
 Transmembrane And Coiled-Coil Domain Family 3  
 GRAM Domain Containing 1B Cholesterol transporter that mediates nc  
 NYN Domain And Retroviral Integrase Containing  
 Alpha Kinase 3 Involved in cardiomyocyte differentiation  
 Membrane Associated Ring-C MARCH4 is ε E3 ubiquitin-protein ligase that may med  
 WD Repeat Domain 48 The protein ε Regulator of deubiquitinating complexes  
 Junctional Cadherin 5 Associ: This gene encodes an endothelial cell-to-cell junction  
 KIAA1522  
 KIAA1549 The protein ε May play a role in photoreceptor functior  
 Zinc Finger SWIM-Type Cont: The protein ε involved in nervous system developmen  
 Zinc Finger Protein 71 May be involved in transcriptional regula  
 Exocyst Complex Component The protein ε Component of the exocyst complex invo  
 Coiled-Coil Domain Containing 81  
 P53 Apoptosis Effector Related To PMP22 Component of intercellular desmosome .  
 Methylcrotonoyl-CoA Carboxy This gene en Carboxyltransferase subunit of the 3-me  
 Fructosamine 3 Kinase A high conce Fructosamine-3-kinase involved in prote  
 Endoplasmic Reticulum Amin: This gene en Aminopeptidase that plays a central role  
 SMAD Specific E3 Ubiquitin Protein Ligase E3 ubiquitin-protein ligase which accepts

Poly(ADP-Ribose) Polymerase Family Member Mono-ADP-ribosyltransferase that mediates DNA damage signaling.  
 F-Box And Leucine Rich Repeat Protein 10  
 Members of the F-box protein family that function as substrate-recognition components of the SCF ubiquitin-ligase complex.  
 Niban Apoptosis Regulator 2  
 May play a role in apoptosis suppression.  
 PTEN Induced Kinase 1  
 This gene encodes a protein that protects against mitochondrial dysfunction and apoptosis.  
 MARCKS Like 1  
 This gene encodes a protein that controls cell movement by regulating actin polymerization.  
 Zinc Finger SWIM-Type Containing 4  
 WNK Lysine Deficient Protein This gene encodes a serine/threonine kinase which plays an important role in the regulation of ion transport.  
 Abhydrolase Domain Containing 1 This gene is upstream of, and in a head-to-head orientation with, the gene for Cyclin J Like.  
 Rho GTPase Activating Protein 10  
 GTPase activator for the small GTPases Rho, Rac, and RAN.  
 Protein Phosphatase 1 Regulatory Subunit 1  
 This gene encodes a protein that acts as a glycogen-targeting subunit for the protein phosphatase 1.  
 SAP30 Like  
 [Isoform 1]: Functions as transcription repressor.  
 VPS37B Subunit Of ESCRT-I  
 Component of the ESCRT-I complex, a protein complex involved in the regulation of membrane trafficking.  
 Dehydrogenase/Reductase 1 This gene encodes a putative oxidoreductase.  
 Ring Finger Protein 122  
 The encoded protein may induce necrosis and apoptosis. May be involved in the regulation of cell growth.  
 Ras And Rab Interactor 3  
 Summary: This protein is a Ras effector protein that functions as a GTPase-activating protein (GAP) for Ras.  
 Proline Rich 5 Like  
 Associates with the mTORC2 complex through its proline-rich domain.  
 KIAA0319 Like  
 This gene is involved in (Microbial infection) Acts as a receptor for the binding of the viral protein VP40.  
 Endoplasmic Reticulum Metalloproteinase 1  
 Within the ovary, required for the organization of the follicle.  
 Pecanex 2  
 This gene codes for a protein that may play a role in tumorigenesis of colorectal cancer.  
 Ubiquitin Domain Containing 1  
 The degradation of ubiquitin may be involved in the regulation of cell growth.  
 F-Box And Leucine Rich Repeat Protein 10  
 The protein encoded by this gene is a substrate-recognition component of the SCF ubiquitin-ligase complex.  
 Zinc Finger Protein 703  
 Transcriptional corepressor which does not bind DNA.  
 Armadillo Repeat Containing 9  
 Acts as a positive regulator of hedgehog signaling.  
 Acyl-CoA Synthetase Family Member 2  
 Acyl-CoA synthetases catalyze the initial reaction in the synthesis of fatty acids.  
 CD276 Molecule  
 The protein encoded by this gene may participate in the regulation of T-cell activation.  
 AT-Hook Transcription Factor  
 Centrosomal protein that plays a key role in the regulation of cell growth.  
 Solute Carrier Family 44 Member 1  
 The protein encoded by this gene [Isoform 3]: Has also thiamine pyrophosphatase activity.  
 CYFIP Related Rac1 Interactor A  
 May negatively regulate RAC1 signaling.  
 Chromosome 1 Open Reading Frame 21  
 Tripartite Motif Containing 8  
 This gene encodes a protein that is an E3 ubiquitin-protein ligase which plays a role in the regulation of cell growth.  
 Transmembrane Protein 163  
 May bind zinc and other divalent cations.  
 Microtubule Associated Protein 1  
 The product is a ubiquitin-like modifier involved in the regulation of cell growth.  
 Deducator Of Cytokinesis 8  
 This gene encodes a protein that is a guanine nucleotide exchange factor (GEF) for RAB33B, Member RAS Oncogene.  
 SRY-Box Transcription Factor This gene encodes a protein that binds to and activates the CDH5 promoter.  
 Yippee Like 3  
 Involved in proliferation and apoptosis in the developing embryo.  
 Eva-1 Homolog A, Regulator Of Programmed Cell Death  
 Acts as a regulator of programmed cell death.

NLR Family CARD Domain C This gene en Probable regulator of the NF-kappa-B ar

ANTXR Cell Adhesion Molec This gene en Plays a role in cell attachment and migr

Mex-3 RNA Binding Family M This gene en RNA-binding protein. May be involved in

SH3GL Interacting Endocytic SGIP1 functi May function in clathrin-mediated endoc

Solute Carrier Family 9 Memb This gene en Mediates electroneutral exchange of pro

Family With Sequence Similarity 167 Member B

Androgen Dependent TFPI Regulating Prot Hydrolyzes bioactive fatty-acid esters of

Poly(ADP-Ribose) Polymeras Poly(ADP-rib ADP-ribosyltransferase that mediates m

FERM Domain Containing 5 May be involved in regulation of cell mig

Myosin Light Chain Kinase 2 This gene en Implicated in the level of global muscle c

MICAL Like 1 Probable lipid-binding protein with highe

KIAA1671

Kelch Like Family Member 6 This gene en Involved in B-lymphocyte antigen recept

Pleckstrin Homology Like Domain Family B Seems to be involved in the assembly of

Tetraspanin 18

Bcl2 Modifying Factor The protein e May play a role in apoptosis. Isoform 1 s

StAR Related Lipid Transfer C This gene en GTPase-activating protein for RhoA, and

SPOC Domain Containing 1 This gene encodes a protein that belongs to the TFIIIS

Coiled-Coil Domain Containing 149

Tripartite Motif Containing 47 E3 ubiquitin-protein ligase that mediates

Tubulin Polyglutamylase Complex Subunit May act in the targeting of the tubulin po

Mex-3 RNA Binding Family Member A RNA binding protein, may be involved in

ADAMTS Like 1 This gene encodes a secreted protein and member of

Peroxisomal Biogenesis Fact The protein e Promotes membrane protrusion and elo

HtrA Serine Peptidase 3 Serine protease that cleaves beta-casein

Synaptotagmin Like 3 The protein e May act as Rab effector protein and play

CKLF Like MARVEL Transme This gene belongs to the chemokine-like factor gene :

AHNAK Nucleoprotein 2 This gene encodes a large nucleoprotein. The encode

Glucocorticoid Induced 1 This gene encodes a protein of unknown function. Exj

Phosphoinositide-3-Kinase Interacting Prot Negative regulator of hepatic phosphatic

EF-Hand Domain Containing This gene en Microtubule-associated protein which re

Formin Like 2 This gene en Plays a role in the regulation of cell morp

Transmembrane Protein 200A

PWWP Domain Containing 2A H2A.Z-specific chromatin binding proteir

C1q And TNF Related 1

Zinc Finger Protein 618 May be involved in transcriptional regula

RAB42, Member RAS Oncogene Family

G Protein-Coupled Receptor 146 Orphan receptor.

LY6/PLAUR Domain Containing 1 Believed to act as a modulator of nicotin  
Twist Family BHLH Transcript The protein ε Binds to the E-box consensus sequence  
Par-3 Family Cell Polarity Regulator Beta Putative adapter protein involved in asyr  
ANTXR Cell Adhesion Molec This gene en Necessary for cellular interactions with k  
Defective In Cullin Neddylation 1 Domain C Antagonizes DCUN1D1-mediated CUL1  
IQ Motif Containing K This gene belongs to the IQ motif-containing family of  
Zymogen Granule Protein 16B  
Musashi RNA Binding Protein This gene en RNA binding protein that regulates the e  
Tetratricopeptide Repeat Domain 39C  
Trafficking Protein Particle Complex 5 May play a role in vesicular transport fro  
Intermediate Filament Family Orphan 2  
Fibulin 7 An adhesion molecule that interacts with  
OCIA Domain Containing 2  
CD109 Molecule This gene en Modulates negatively TGFB1 signaling in  
UBX Domain Protein 2B Adapter protein required for Golgi and e  
SLIT And NTRK Like Family M This gene en It is involved in synaptogenesis and pror  
Ankyrin Repeat And SOCS B This gene en Substrate-recognition component of a S  
Zinc Finger Protein 358 May be involved in transcriptional regula  
Signal Regulatory Protein Al The protein ε Immunoglobulin-like cell surface recepto  
Cilia And Flagella Associated Protein 54 Required for assembly and function of c  
C2 Calcium Dependent Domain Containing May be involved in inflammatory proces  
Collagen And Calcium Binding This gene is Required for lymphangioblast budding a  
Family With Sequence Similarity 117 Member B  
GLI Pathogenesis Related 2  
NIMA Related Kinase 10 Plays a role in the cellular response to L  
SH3 Domain Containing 19 This gene en May play a role in regulating A disintegri  
Coiled-Coil Domain Containing 112  
SH3 Domain Containing Ring Finger 2 Has E3 ubiquitin-protein ligase activity (f  
Schlafen Family Member 5 May have a role in hematopoietic cell dif  
Cbp/P300 Interacting Transac The protein ε Acts as transcriptional coactivator for TF  
APC Down-Regulated 1 Like  
High Mobility Group AT-Hook 1 Pseudogene 2  
Transmembrane Protein 154  
Nik Related Kinase The mouse c May phosphorylate cofilin-1 and induce ;  
Sterile Alpha Motif Domain Cc This gene en May be involved in endosome fusion. M  
OTU Deubiquitinase 1 Deubiquitinat Deubiquitinating enzyme that specifically  
Out At First Homolog  
Adhesion G Protein-Coupled Receptor F5 Receptor that plays a critical role in lung

Endosome-Lysosome Associated Apoptosis Functions as a regulator of the BMP signaling  
Fibronectin Type III Domain C This gene encodes [Irisin]: Contrary to mouse, may not be in  
Inositol Polyphosphate Multikinase This gene encodes Inositol phosphate kinase with a broad substrate  
T-Complex 11 Like 2

N-Acetyltransferase Domain Containing 1

KN Motif And Ankyrin Repeat Domains 3 May be involved in the control of cytoskeleton  
BCL9 Like Transcriptional regulator that acts as an

Prolyl 4-Hydroxylase Subunit . This gene encodes Catalyzes the post-translational formation of

CD163 Molecule Like 1 This gene encodes a member of the scavenger receptor

Kinase Suppressor Of Ras 2 Location-regulated scaffold connecting Ras to

Solute Carrier Family 46 Member 1 The protein encoded by this gene is a member of a transporter

SH3 And PX Domains 2B This gene encodes Adapter protein involved in invadopodia

Repulsive Guidance Molecule RGMB is a glycoprotein Member of the repulsive guidance molecule

Anoctamin 9 The protein encoded by this gene has calcium-dependent phospholipid scrambling

Alkaline Ceramidase 2 The sphingolipid Golgi ceramidase that catalyzes the hydrolysis of

Polypeptide N-Acetylgalactosaminyltransferase 1 Catalyzes the initial reaction in O-linked

Family With Sequence Similarity 89 Member A

Microtubule Associated Serine Threonine Kinase This gene encodes a member of the microtubule-associated

Agrin This gene encodes [Agrin C-terminal 22 kDa fragment]: this protein is

RAB15, Member RAS Oncogene Family May act in concert with RAB3A in regulating

G Protein-Coupled Receptor . This gene encodes Orphan receptor.

GTPase, Very Large Interferon Inducible Pseudogene 1

Transmembrane Protein 233

Yippee Like 2

Mex-3 RNA Binding Family Member D RNA binding protein, may be involved in

SH2 Domain Containing 5 May be involved in synaptic plasticity regulation

Cortexin 1 May mediate extracellular or intracellular signaling

Chromosome 16 Open Reading Frame 74

DENN Domain Containing 6B Guanine nucleotide exchange factor (GEF)

FKBP Prolyl Isomerase 1C

Nuclear Factor, Erythroid 2 Like 3 Pseudogene 1

Family With Sequence Similarity 229 Member A

RNA, 7SL, Cytoplasmic 689, Pseudogene

ABL Proto-Oncogene 1, Non-receptor tyrosine-protein kinase This gene is a non-receptor tyrosine-protein kinase that

Actinin Alpha 4 Alpha actinin F-actin cross-linking protein which is the

Adenylate Kinase 1 This gene encodes Catalyzes the reversible transfer of the terminal

Adenylate Kinase 4 This gene encodes Involved in maintaining the homeostasis of

Aldehyde Dehydrogenase 2 Family This protein belongs to the aldehyde dehydrogenase family

|                                |                                                                |
|--------------------------------|----------------------------------------------------------------|
| Bridging Integrator 1          | This gene encodes a key player in the control of plasma r      |
| Solute Carrier Family 25 Mem   | This gene is involved in mitochondrial ADP/ATP trans           |
| Annexin A2                     | This gene encodes Calcium-regulated membrane-binding p         |
| Annexin A2 Pseudogene 2        | Calcium-regulated membrane-binding p                           |
| Annexin A2 Pseudogene 3        |                                                                |
| Annexin A6                     | Annexin VI b May associate with CD21. May regulate             |
| Apoptotic Peptidase Activating | This gene encodes Oligomeric Apaf-1 mediates the cytochr       |
| Amyloid Beta Precursor Prote   | The protein encodes Putative function in synaptic vesicle exo  |
| Amyloid Beta Precursor Prote   | The protein encodes Transcription coregulator that can have l  |
| Amyloid Beta Precursor Like    | This gene encodes May play a role in the regulation of hemo    |
| Amyloid Beta Precursor Prote   | This gene encodes Amyloid-beta peptides are lipophilic met     |
| Ras Homolog Family Member      | This gene encodes Regulates a signal transduction pathway      |
| Rho GDP Dissociation Inhibit   | The GDP-dis Inhibits GDP/GTP exchange reaction of              |
| ATPase H+ Transporting Acc     | This gene encodes Accessory subunit of the proton-transpo      |
| ATRX Chromatin Remodeler       | The protein encodes Involved in transcriptional regulation and |
| BRCA1 Associated RING Dom      | This gene encodes E3 ubiquitin-protein ligase. The BRCA1-      |
| Branched Chain Keto Acid De    | This gene encodes The branched-chain alpha-keto dehydro        |
| BAF Chromatin Remodeling C     | This gene is directly involved, with Myc and IgH, in a t       |
| BCS1 Homolog, Ubiquinol-Cy     | This gene encodes Chaperone necessary for the assembly         |
| Brain Derived Neurotrophic F   | This gene encodes [BDNF precursor form]: Important signal      |
| Beaded Filament Structural P   | This gene encodes Required for the correct formation of len    |
| Basigin (Ok Blood Group)       | The protein encodes (Microbial infection) Erythrocyte receptor |
| Bone Marrow Stromal Cell An    | Bone marrow IFN-induced antiviral host restriction fact        |
| Biotinidase                    | The protein encodes Catalytic release of biotin from biocytin, |
| Diacylglycerol Lipase Alpha    | This gene encodes Catalyzes the hydrolysis of diacylglycer     |
| Calpain 1                      | The calpains Calcium-regulated non-lysosomal thiol-p           |
| Calpastatin                    | The protein encodes Specific inhibition of calpain (calcium-de |
| Caspase 6                      | This gene encodes Involved in the activation cascade of cas    |
| Catalase                       | This gene encodes Occurs in almost all aerobically respiring   |
| RUNX Family Transcription F    | Core binding Forms the heterodimeric complex core-t            |
| CD47 Molecule                  | This gene encodes Has a role in both cell adhesion by actin    |
| Cadherin 4                     | This gene encodes Cadherins are calcium-dependent cell a       |
| Cyclin Dependent Kinase 6      | The protein encodes Serine/threonine-protein kinase involved   |
| Cyclin Dependent Kinase Inhi   | This gene encodes Acts as a negative regulator of the prolif   |
| Cyclin Dependent Kinase Inhi   | The protein encodes Interacts strongly with CDK6, weakly wit   |
| Cyclin Dependent Kinase Inhi   | The protein encodes Interacts strongly with CDK4 and CDK6      |
| Chimerin 1                     | This gene encodes GTPase-activating protein for p21-rac ar     |
| Chloride Voltage-Gated Chan    | The CLCN family Proton-coupled chloride transporter. Fur       |

|                                                        |                                                                                                                         |
|--------------------------------------------------------|-------------------------------------------------------------------------------------------------------------------------|
| Chloride Voltage-Gated Channel Clusterin               | This gene encodes a proton-coupled chloride transporter. The protein [Isoform 1]: Functions as extracellular clusterin. |
| Collagen Type VIII Alpha 1 Chain                       | This gene encodes a macromolecular component of the subunit of collagen type VIII.                                      |
| Carboxypeptidase D                                     | The metallopeptidase family of enzymes is diverse. Carboxypeptidase D is a member of this family.                       |
| Cysteine Rich Protein 1                                | Cysteine-rich protein 1 seems to have a role in zinc absorption.                                                        |
| C-Reactive Protein                                     | The protein CRP displays several functions associated with inflammation.                                                |
| Hyaluronan And Proteoglycan Link Protein               | Stabilizes the aggregates of proteoglycans and hyaluronan.                                                              |
| Crystallin Alpha B                                     | Mammalian crystallin alpha B may contribute to the transparency and refractive index of the eye lens.                   |
| Cystatin C                                             | The cystatin C is an inhibitor of cysteine proteinases, particularly cathepsins.                                        |
| Cellular Communication Network Component 1             | The protein CCN1 is a major connective tissue mitogen and chemoattractant for various cell types.                       |
| Catenin Alpha 1                                        | This gene encodes a protein that associates with the cytoplasmic domain of E-cadherin.                                  |
| Cathepsin D                                            | This gene encodes an acid protease active in intracellular protein turnover.                                            |
| Cathepsin Z                                            | The protein CTZ exhibits carboxy-monopeptidase activity as well as other proteolytic functions.                         |
| Death Associated Protein 1                             | This gene encodes a negative regulator of autophagy. It is involved in the regulation of cell death.                    |
| Drebrin 1                                              | The protein DRB1 is an actin cytoskeleton-organizing protein that is involved in cell migration.                        |
| Dystrophin                                             | This gene spans the sarcolemma and anchors the extracellular matrix to the cytoskeleton.                                |
| DNA Replication Helicase/Nucleosome Helicase 1         | This gene encodes a key enzyme involved in DNA replication and chromosome segregation.                                  |
| Dedicator Of Cytokinesis 1                             | This gene encodes a protein involved in cytoskeletal rearrangements during cytokinesis.                                 |
| Dipeptidyl Peptidase 4                                 | The DPP4 gene encodes a cell surface glycoprotein receptor involved in insulin resistance.                              |
| Dystrobrevin Alpha                                     | The protein DTB1 may be involved in the formation and stabilization of the neuromuscular junction.                      |
| Extracellular Matrix Protein 1                         | This gene encodes a protein involved in endochondral bone formation and cartilage development.                          |
| Eukaryotic Translation Initiation Factor 4B            | Required for the binding of mRNA to ribosomes during translation initiation.                                            |
| Erythrocyte Membrane Protein 1                         | Erythrocyte membrane protein 1 may function to confer stability and plasticity to the red blood cell membrane.          |
| Erythropoietin Receptor                                | This gene encodes isoform EPOR-T, which acts as a dominant-negative regulator of the erythropoietin receptor.           |
| Nuclear Receptor Subfamily 2 Group F Member 1          | Transcription factor predominantly involved in the regulation of gene expression.                                       |
| ETS Variant Transcription Factor 4                     | Transcriptional activator that binds to the ETS consensus sequence.                                                     |
| Fanconi Anemia Complementation Group E                 | As part of the Fanconi anemia (FA) complementation group E, it is involved in DNA repair.                               |
| Acyl-CoA Synthetase Long Chain Family Class I Member 1 | The protein ACSL1 catalyzes the conversion of long-chain fatty acids to acyl-CoA.                                       |
| Acyl-CoA Synthetase Long Chain Family Class I Member 2 | The protein ACSL2 catalyzes the conversion of long-chain fatty acids to acyl-CoA.                                       |
| Acyl-CoA Synthetase Long Chain Family Class I Member 3 | The protein ACSL3 catalyzes the conversion of long-chain fatty acids to acyl-CoA.                                       |
| Fibrillin 2                                            | The protein [Fibrillin-2]: Fibrillins are structural components of the extracellular matrix.                            |
| Flap Structure-Specific Endonuclease 1                 | The protein FSE1 is a structure-specific nuclease with 5'-flap endonuclease activity.                                   |
| Fibroblast Growth Factor Receptor 4                    | The protein FGFR4 is a tyrosine-protein kinase that acts as a cell surface receptor.                                    |
| Four And A Half LIM Domains Protein 1                  | This gene encodes a protein that may have an involvement in muscle development.                                         |
| Four And A Half LIM Domains Protein 2                  | The protein FOXL2 is recruited by SOX15 to FOXK1 to promote muscle development.                                         |
| Flotillin 2                                            | Caveolae are membrane structures that may act as a scaffolding protein within the cell.                                 |
| Fms Related Receptor Tyrosine Kinase 1                 | This gene encodes a tyrosine-protein kinase that acts as a cell surface receptor.                                       |
| Alpha-L-Fucosidase 2                                   | This gene encodes an alpha-L-fucosidase responsible for the degradation of fucose residues.                             |

Atypical Chemokine Receptor The protein ε Atypical chemokine receptor that control

Glucosidase Alpha, Acid This gene en Essential for the degradation of glycogen

Galactosamine (N-Acetyl)-6-S This gene encodes N-acetylgalactosamine-6-sulfatase

GATA Binding Protein 3 This gene en Transcriptional activator which binds to t

Glucosaminyl (N-Acetyl) Tran: This gene is Glycosyltransferase that catalyzes the tr

Galactosidase Beta 1 This gene en [Isoform 1]: Cleaves beta-linked termina

Glycine Decarboxylase Degradation The glycine cleavage system catalyzes t

Glycine Decarboxylase Pseudogene 1

Glutaminase This gene en [Isoform 2]: Lacks catalytic activity.||Cata

Glucosamine (N-Acetyl)-6-Sul The product of this gene is a lysosomal enzyme foun

Granulin Precursor Granulins are [Granulin-3]: Inhibits epithelial cell prolife

Glutamate Ionotropic Receptor NMDA Type Potential apoptotic regulator.

Glycogen Synthase Kinase 3 The protein ε Constitutively active protein kinase that :

Glutathione S-Transferase Mt Cytosolic anc Conjugation of reduced glutathione to a

General Transcription Factor | This gene en Interacts with the basal transcription ma

Hydroxyacyl-CoA Dehydroger This gene en Mitochondrial trifunctional enzyme cataly

Hydroxyacyl-CoA Dehydroger This gene en Mitochondrial trifunctional enzyme cataly

Histone Deacetylase 1 Histone acety Responsible for the deacetylation of lysi

Helicase, Lymphoid Specific This gene en Plays an essential role in normal develo

Hypoxia Inducible Factor 1 Su This gene en Functions as a master transcriptional req

Major Histocompatibility Com; HLA-A belong Allele A\*01:01: Presents a restricted pep

Major Histocompatibility Com; HLA-B belong Allele B\*07:02: Displays peptides sharin

Major Histocompatibility Com; This major hi Involved in the presentation of foreign ar

Major Histocompatibility Com; This major histocompatibility complex gene represent

Heme Oxygenase 2 Heme oxygei Heme oxygenase cleaves the heme ring

Heterogeneous Nuclear Ribor This gene be Binds pre-mRNA and nucleates the ass

Homeobox B9 This gene is Sequence-specific transcription factor w

Hydroxysteroid 17-Beta Dehydrogenase 2 Capable of catalyzing the interconversio

5-Hydroxytryptamine Recepto The protein ε G-protein coupled receptor for 5-hydroxy

Inhibitor Of DNA Binding 3, HI The protein ε Transcriptional regulator (lacking a basic

Iduronate 2-Sulfatase This gene en Lysosomal enzyme involved in the degr

Interferon Alpha And Beta Re The protein ε Component of the receptor for type I inte

Interferon Gamma Receptor 2 This gene (IF Associates with IFNGR1 to form a recep

Insulin Like Growth Factor 2 F This gene en Transport of phosphorylated lysosomal ε

Insulin Like Growth Factor Bir This gene is IGF-binding proteins prolong the half-life

Insulin Like Growth Factor Bir This gene is IGF-binding proteins prolong the half-life

Insulin Like Growth Factor Binding Protein I IGF-binding proteins prolong the half-life

Insulin Like Growth Factor Bir This gene en Binds IGF-I and IGF-II with a relatively lc



|                                |                                                            |
|--------------------------------|------------------------------------------------------------|
| Interleukin 4 Receptor         | This gene en Receptor for both interleukin 4 and interl    |
| Interleukin 18                 | The protein ε A proinflammatory cytokine primarily inv     |
| Integrin Subunit Beta 5        | This gene en (Microbial infection) Integrin ITGAV:ITGI     |
| Inositol 1,4,5-Trisphosphate F | This gene en Receptor for inositol 1,4,5-trisphosphate     |
| Jumonji And AT-Rich Interacti  | This gene en Regulator of histone methyltransferase c      |
| Potassium Two Pore Domain      | This gene en Ion channel that contributes to passive t     |
| Kinesin Family Member 22       | The protein ε Kinesin family member that is involved in    |
| Keratin 15                     | The protein encoded by this gene is a member of the        |
| Keratin 19                     | The protein ε Involved in the organization of myofibers    |
| Lysosomal Associated Membr     | The protein ε Acts as a receptor for Lassa virus protei    |
| LIM And SH3 Protein 1          | This gene en Plays an important role in the regulation     |
| LIM Domain Kinase 1            | There are ap [Isoform 3]: Has a dominant negative eff      |
| Latent Transforming Growth F   | The protein ε May play an integral structural role in ele  |
| Basal Cell Adhesion Molecule   | This gene en Laminin alpha-5 receptor. May mediate i       |
| Mannosidase Alpha Class 1A     | This gene en Involved in the maturation of Asn-linked      |
| Mannosidase Alpha Class 2B     | This gene en Necessary for the catabolism of N-linkec      |
| Mannosidase Beta               | This gene en Exoglycosidase that cleaves the single b      |
| Monoamine Oxidase A            | This gene is . Catalyzes the oxidative deamination of b    |
| Microtubule Associated Protei  | This gene en Structural protein involved in the filamen    |
| Microtubule Associated Protei  | This gene en The exact function of MAP2 is unknown         |
| Microtubule Associated Protei  | The protein ε Non-neuronal microtubule-associated pr       |
| Milk Fat Globule EGF And Fa    | This gene en Medin is the main constituent of aortic r     |
| Alpha-1,6-Mannosylglycoprote   | The protein ε [Secreted alpha-1,6-mannosylglycoprote       |
| Matrix Gla Protein             | This gene en Associates with the organic matrix of boi     |
| Membrane Metalloendopeptid     | The protein ε Thermolysin-like specificity, but is almos   |
| Matrix Metallopeptidase 2      | This gene is . [Isoform 2]: Mediates the proteolysis of (  |
| Matrix Metallopeptidase 7      | This gene en Degrades casein, gelatins of types I, III,    |
| Mercaptopyruvate Sulfurtrans   | This protein ε Transfer of a sulfur ion to cyanide or to c |
| Myosin Heavy Chain 9           | This gene en Cellular myosin that appears to play a rc     |
| Myosin Heavy Chain 10          | This gene en Cellular myosin that appears to play a rc     |
| Myosin Light Chain 4           | Myosin is a hRegulatory light chain of myosin. Does r      |
| Myosin ID                      | Unconventional myosin that functions as                    |
| Myosin VI                      | This gene en Myosins are actin-based motor molecule        |
| Nuclear Factor I X             | The protein ε Recognizes and binds the palindromic s       |
| Nuclear Factor Kappa B Subu    | This gene en NF-kappa-B is a pleiotropic transcription     |
| Notch Receptor 2               | This gene en Functions 2 as a receptor for membrane-b      |
| Natriuretic Peptide Receptor 1 | Guanylyl cyclReceptor for the atrial natriuretic peptide   |
| Discoidin Domain Receptor T    | This gene en Tyrosine kinase involved in the regulatio     |

|                                           |                            |                                              |
|-------------------------------------------|----------------------------|----------------------------------------------|
| Nucleobindin 1                            | This gene en               | Major calcium-binding protein of the Gol     |
| Claudin 11                                | This gene en               | Plays a major role in tight junction-specifi |
| Phosphatidylethanolamine Bir              | This gene en               | Binds ATP, opioids and phosphatidyleth       |
| Phosducin Like                            | Phosducin-lik [Isoform 1]: | Functions as a co-chaperon                   |
| Pterin-4 Alpha-Carbinolamine              | This gene en               | Involved in tetrahydrobiopterin biosynthe    |
| Protocadherin Gamma Subfa                 | This gene is               | Potential calcium-dependent cell-adhesi      |
| Proprotein Convertase Subtili             | This gene en               | Serine endoprotease that processes var       |
| Phosphofructokinase, Platelel             | This gene en               | Catalyzes the phosphorylation of D-fruct     |
| Phosphogluconate Dehydrog                 | 6-phosphogl                | Catalyzes the oxidative decarboxylation      |
| Phosphatidylinositol Transfer             | This gene en               | Catalyzes the transfer of PtdIns and phc     |
| Plasminogen Activator, Urokir             | This gene en               | Acts as a receptor for urokinase plasmin     |
| Procollagen-Lysine,2-Oxoglut              | Lysyl hydroxy              | Part of a complex composed of PLOD1,         |
| PML Nuclear Body Scaffold                 | The protein e              | Exhibits antiviral activity against both DN  |
| Paired Related Homeobox 1                 | The DNA-as                 | Acts as a transcriptional regulator of mu    |
| Peroxisome Proliferator Activ             | Peroxisome                 | Ligand-activated transcription factor. Ke    |
| Protein Phosphatase 3 Catalytic Subunit A | Calcium-depend             | Calcium-dependent, calmodulin-stimulat       |
| DNA Primase Subunit 1                     | The replicatic             | Catalytic subunit of the DNA primase co      |
| Protein Kinase AMP-Activate               | The protein e              | Non-catalytic subunit of AMP-activated p     |
| CAMP-Dependent Protein Kin                | The protein e              | Extremely potent competitive inhibitor of    |
| Protein Kinase C Alpha                    | Protein kinas              | Calcium-activated, phospholipid- and dia     |
| Protein Kinase X-Linked                   | This gene en               | Serine/threonine protein kinase regulate     |
| Prion Protein                             | The protein e              | Its primary physiological function is uncl   |
| Protein S                                 | This gene en               | Anticoagulant plasma protein; it is a cof    |
| Proline Rich And Gla Domain               | This gene encodes          | a vitamin K-dependent, gamma-ca              |
| HtrA Serine Peptidase 1                   | This gene en               | Serine protease with a variety of targets.   |
| Prosaposin                                | This gene en               | [Prosaposin]: Behaves as a myelinotrop       |
| Presenilin 2                              | Alzheimer's c              | Probable catalytic subunit of the gamma      |
| Proteasome 20S Subunit Bet                | The proteasc               | The proteasome is a multicatalytic prote     |
| Proteasome Activator Subuni               | The 26S prot               | Implicated in immunoproteasome asser         |
| Phosphatase And Tensin Hor                | This gene wa               | [Isoform alpha]: Functional kinase, like is  |
| Prostaglandin E Receptor 1                | The protein e              | Receptor for prostaglandin E2 (PGE2). 7      |
| Prostaglandin F2 Receptor Inhibitor       | Inhibits the binding       | of prostaglandin F2-                         |
| Protein Tyrosine Kinase 2                 | This gene en               | [Isoform 6]: Isoform 6 (FRNK) does not c     |
| Protein Tyrosine Phosphatase              | The protein e              | Protein tyrosine phosphatase which may       |
| Protein Tyrosine Phosphatase              | The protein e              | Regulation of processes involving cell cc    |
| 6-Pyruvoyltetrahydropterin Sy             | The enzyme                 | Involved in the biosynthesis of tetrahydr    |
| RAB5B, Member RAS Oncogene Family         | Protein transport.         | Probably involved in v                       |
| Ral Guanine Nucleotide Dissc              | Guanine nuc                | Stimulates the dissociation of GDP from      |

Phospholipase A And Acyltransferase 10 Exhibits both phospholipase A1/2 and acyltransferase activity

RB Binding Protein 8, Endonuclease 1 The protein encoded by this gene is an endonuclease that cooperates with the Reticulocalbin 1

Reticulocalbin 1 Reticulocalbin 1 May regulate calcium-dependent activities

Regulatory Factor X3 This gene is a transcription factor required for ciliogenesis

Regulator Of G Protein Signaling 1 This gene encodes a protein that down-regulates signaling from heterotrimeric G-proteins

Arginyl Aminopeptidase Exopeptidase which selectively removes arginine from peptides

Retinitis Pigmentosa GTPase This gene encodes a protein that could be a guanine-nucleotide releasing factor

Ribosomal Protein S6 Kinase This gene encodes a serine/threonine-protein kinase that acts as a ribosome receptor

Ribosome Binding Protein 1 This gene encodes a protein that acts as a ribosome receptor and mediates the assembly of the 80S ribosome

Syndecan 4 The protein encoded by this gene is a cell surface proteoglycan that bears heparan sulfate side chains

Sarcoglycan Gamma This gene encodes a component of the sarcoglycan complex, which is a component of the dystrophin-glycoprotein complex

SH3 Domain Binding Glutamate Rich Protein Like

Solute Carrier Family 3 Member 1 This gene is a component of several heterodimeric amino acid transporters

Solute Carrier Family 8 Member 1 In cardiac myocytes, this gene mediates the exchange of one Ca<sup>2+</sup> ion for one Na<sup>+</sup> ion

Solute Carrier Family 12 Member 1 The protein encoded by this gene is an electrically silent transporter system. Members of this family are involved in the transport of various amino acids

SWI/SNF Related, Matrix Associated, Nuclear Export Signal Containing Protein The protein encoded by this gene is involved in transcriptional activation and regulation of gene expression

Sepiapterin Reductase This gene encodes a protein that catalyzes the final one or two reductions of sepiapterin to sepiapterin

ST13 Hsp70 Interacting Protein The protein encoded by this gene is one of a family of HIP oligomers that binds the ATPase domain of the Hsp70

Signal Transducer And Activator Of Transcription 1 The protein encoded by this gene is a signal transducer and transcription activator

Sulfotransferase Family 1E Member 1 Sulfotransferase that utilizes 3'-phosphoadenylylated serine as a donor

Serine/Threonine Kinase 10 This gene encodes a serine/threonine-protein kinase involved in the regulation of cell growth and differentiation

ADAM Metallopeptidase Domain 1 This gene encodes a protein that cleaves the membrane-bound precursor of the active site of the ADAM metalloproteinase

Transducin Beta Like 1 X-Linked This gene encodes an F-box-like protein involved in the recruitment of ubiquitin ligase

Transcription Factor 19 This gene encodes a potential trans-activating factor that could be involved in the regulation of gene expression

Transcobalamin 2 This gene encodes a primary vitamin B12-binding and transport protein

Peroxiredoxin 2 This gene encodes a thiol-specific peroxidase that catalyzes the reduction of hydroperoxides

Transcription Factor Dp-2 The gene is a transcription factor that can stimulate E2F-dependent transcription

Transforming Growth Factor E The protein encoded by this gene is a transmembrane serine/threonine kinase

Tight Junction Protein 1 This gene encodes TJP1, TJP2, and TJP3 are closely related proteins that form tight junctions

Tetraspanin 8 The protein encoded by this gene is a member of the tetraspanin family

TNF Receptor Superfamily Member 1 The protein encoded by this gene is a receptor with high affinity for TNFSF2/TNFR1

Tensin 1 The protein encoded by this gene is involved in fibrillar adhesion formation. Members of this family are involved in the regulation of cell growth and differentiation

DNA Topoisomerase II Beta This gene encodes a protein that controls the topological states of DNA by topoisomerase activity

Tumor Protein P53 This gene encodes a protein that acts as a tumor suppressor in many tumor types

TSPY Like 1 The protein encoded by this gene is found in the nucleolus

Pleckstrin Homology Like Domain 1 This gene is a protein that plays a role in regulating placenta growth

Thiosulfate Sulfurtransferase This is one of a family of proteins that are involved in the formation of iron-sulfur complexes, cytochrome c, and other heme proteins

GDP-L-Fucose Synthase Tissue specific. Catalyzes the two-step NADP-dependent synthesis of GDP-L-fucose

Uridine-Cytidine Kinase 2 This gene en Phosphorylates uridine and cytidine to u

Vascular Endothelial Growth F This gene en Growth factor for endothelial cells. VEGF

WAS/WASL Interacting Prote This gene en Plays a role in the reorganization of the ;

YY1 Transcription Factor YY1 is a ubiq Multifunctional transcription factor that e

Zinc Finger Protein 134 May be involved in transcriptional regula

Tripartite Motif Containing 25 The protein ε Functions as a ubiquitin E3 ligase and a

Zinc Finger Protein 217 Binds to the promoters of target genes a

LDL Receptor Related Proteir This gene en Cell surface receptor for Reelin (RELN)

Tubulin Alpha 1a Microtubules Tubulin is the major constituent of micro

Tissue Factor Pathway Inhibit This gene en May play a role in the regulation of plasr

FMR1 Autosomal Homolog 1 The protein ε RNA-binding protein required for embryc

Transmembrane Protein 187 This gene consists of two exons and encodes a multi-

Stannin Plays a role in the toxic effects of organc

Cell Division Cycle 7 This gene en Seems to phosphorylate critical substrat

Cell Division Cycle 45 The protein ε Required for initiation of chromosomal D

Hyaluronidase 3 This gene en Facilitates sperm penetration into the lay

NCK Adaptor Protein 2 This gene en Adapter protein which associates with ty

Tyrosylprotein Sulfotransferas The protein ε Catalyzes the O-sulfation of tyrosine res

PPFIA Binding Protein 1 The protein ε May regulate the disassembly of focal a

Potassium Voltage-Gated Ch: Voltage-gate Cytoplasmic potassium channel subunit

Interferon Induced Transmembrane Proteir IFN-induced antiviral protein which inhib

Pirin This gene en Transcriptional coregulator of NF-kappa-

Regulator Of G Protein Signal The protein ε Inhibits signal transduction by increasing

Phospholipid Phosphatase 2 The protein ε Magnesium-independent phospholipid p

Ribonuclease T2 This ribonucl Ribonuclease that plays an essential rol

Protocadherin Gamma Subfai This gene is Potential calcium-dependent cell-adhesi

Aldo-Keto Reductase Family This gene en Catalyzes the conversion of aldehydes a

NUMB Endocytic Adaptor Pro The protein ε Plays a role in the process of neurogene

Tankyrase Poly-ADP-ribosyltransferase involved in

Insulin Receptor Substrate 2 This gene en May mediate the control of various cellul

Cathepsin F Cathepsins a Thiol protease which is believed to partic

ADAM Metallopeptidase Dom The protein ε Active metalloproteinase with gelatinolyt

Cellular Repressor Of E1A Sti The adenovir May contribute to the transcriptional con

Neuropilin 2 This gene en (Microbial infection) Acts as a receptor fo

Suppressor Of Cytokine Sign: This gene en SOCS family proteins form part of a clas

Aldehyde Dehydrogenase 1 F This protein l Converts retinaldehyde to retinoic acid (l

Immediate Early Response 3 This gene fur May play a role in the ERK signaling pat

Rho Guanine Nucleotide Excl This gene en Acts as a RAC1 guanine nucleotide excl

Src Kinase Associated Phosp The protein ε May be involved in B-cell and macropha

Chloride Intracellular Channel Chloride chai Can insert into membranes and form chl

3'-Phosphoadenosine 5'-Phos Sulfation is a Bifunctional enzyme with both ATP sulfu

LIM Domain Binding 2 The protein ε Binds to the LIM domain of a wide variet

Protein Kinase, Membrane Ac This gene en Acts as a negative regulator of entry into

Interleukin 1 Receptor Like 1 The protein ε [Isoform B]: Inhibits IL-33 signaling. ||Rec

Zinc Finger BED-Type Contain This gene is Binds to 5'-TGTCG[CT]GA[CT]A-3' DNA

Solute Carrier Family 16 Mem This gene is Proton-coupled monocarboxylate transp

Cytohesin 3 This gene en Promotes guanine-nucleotide exchange

Adhesion G Protein-Coupled | This gene en [ADGRG1 N-terminal fragment]: Plays a

Beta-1,4-Galactosyltransferas This gene is Catalyzes the synthesis of lactosylceran

Zinc Finger FYVE-Type Cont This gene en Early endosomal protein that functions to

Family With Sequence Similarity 189 Member A2

Mediator Complex Subunit 17 The activatio Component of the Mediator complex, a c

Integral Membrane Protein 2E Amyloid prec Bri23 peptide prevents aggregation of A

RAS Protein Activator Like 2 This gene en Inhibitory regulator of the Ras-cyclic AM

Interleukin 27 Receptor Subu In mice, CD4 Receptor for IL27. Requires IL6ST/gp13

Solute Carrier Family 4 Memb The protein ε Mediates electroneutral sodium- and car

Aminopeptidase Puromycin S This gene en Aminopeptidase with broad substrate sp

Vacuolar Protein Sorting 4 Ho The protein ε Involved in late steps of the endosomal |

Nuclear Receptor Corepresso This gene en Mediates transcriptional repression by c

Microtubule Associated Mono The protein ε Nuclear monooxygenase that promotes

Protein Phosphatase, Mg2+/M The protein ε Dephosphorylates and concomitantly de

Syndecan 3 The protein ε Cell surface proteoglycan that may bear

Rap Guanine Nucleotide Excl Members of 1 Functions as a guanine nucleotide exch

Translocation Associated Mer TRAM2 is a c Necessary for collagen type I synthesis.

Thymocyte Selection Associa The protein ε Transcriptional regulator with a major rol

Sushi Domain Containing 6 May play a role in growth-suppressive a

RB1 Inducible Coiled-Coil 1 The protein ε Involved in autophagy (PubMed:217758

GIN5 Complex Subunit 1 The yeast he Required for correct functioning of the G

Centrosomal Protein 170 The product | Plays a role in microtubule organization

Kelch Like Family Member 21 Substrate-specific adapter of a BCR (BT

Ring Finger Protein 10 The protein ε Transcriptional factor involved in the reg

Major Vault Protein This gene en Required for normal vault structure. Vau

Histone Deacetylase 5 Histones play Responsible for the deacetylation of lysi

DnaJ Heat Shock Protein Fan This gene en Plays an indispensable role in the organ

Tetraspanin 5 The protein ε Regulates ADAM10 maturation and traff

Solute Carrier Family 25 Mem This gene is Mitochondrial and calcium-binding carrie

Dehydrogenase/Reductase 9 This gene en 3-alpha-hydroxysteroid dehydrogenase 1

Myelin Protein Zero Like 2 Thymus deve Mediates homophilic cell-cell adhesion.

P21 (RAC1) Activated Kinase PAK proteins Serine/threonine protein kinase that play

High Mobility Group 20A Plays a role in neuronal differentiation a:

Carboxypeptidase Q This gene en Carboxypeptidase that may play an impo

Component Of Oligomeric Go The protein ε Required for normal Golgi function.

Follistatin Follistatin is Binds directly to activin and functions as

Unc-13 Homolog B This gene is Plays a role in vesicle maturation during

Fibulin 5 The protein ε Essential for elastic fiber formation, is in

Sorbin And SH3 Domain Conl This gene en Plays a role in tyrosine phosphorylation

Interferon Induced Transmembrane Proteir IFN-induced antiviral protein which inhib

Poly(A) Binding Protein Intera The protein ε Acts as a coactivator in the regulation of

RAD51 Associated Protein 1 May participate in a common DNA dama

Calcium/Calmodulin Depend The product Calcium/calmodulin-dependent protein k

Ras Related GTP Binding A (Microbial infection) May alternatively ac

G Protein Subunit Beta 5 Heterotrimeri Enhances GTPase-activating protein (G

Nestin This gene en Required for brain and eye development

Fibrinogen Like 2 The protein ε May play a role in physiologic lymphocyt

Neuropeptide FF Receptor 2 This gene en Receptor for NPAF (A-18-F-amide) and

UDP Glucuronosyltransferase The protein ε UDP-glucuronosyltransferases catalyze

Translocase Of Outer Mitoch The protein ε Plays a role in the import of cytosolically

OS9 Endoplasmic Reticulum l This gene en Lectin which functions in endoplasmic re

Cyclin I The protein encoded by this gene belongs to the highl

Midline 2 The protein ε May play a role in microtubule stabilizati

Solute Carrier Family 35 Mem Nucleotide st Antiporter transporting nucleotide sugars

DnaJ Heat Shock Protein Fan The protein ε Probable chaperone. Stimulates ATP hy

Serine Protease 23 This gene encodes a conserved member of the trypsi

Butyrophilin Subfamily 3 Mem This gene en Plays a role in T-cell responses in the ac

WD Repeat Domain 45 This gene en Component of the autophagy machinery

RAB, Member Of RAS Oncog The RABL2B Small GTPase required for ciliation. Acti

Follistatin Like 1 This gene en May modulate the action of some growth

Solute Carrier Family 2 Memb Hexose trans Probable sugar transporter that acts as :

TP53 Target 1

Kruppel Like Factor 12 Activator pro Confers strong transcriptional repressor

Alpha-1,3-Mannosyl-Glycopro This gene en Glycosyltransferase that participates in t

Twinfilin Actin Binding Protein The protein ε Actin-binding protein involved in motile a

Muscle RAS Oncogene Homc This gene en Serves as an important signal transduce

Calsyntenin 1 This gene is Induces KLC1 association with vesicles

Zinc Finger And BTB Domain Containing 1 Acts as a transcriptional repressor (Publ  
Kinesin Associated Protein 3 The small G Involved in tethering the chromosomes t  
RAB3 GTPase Activating Prof This gene en Probable catalytic subunit of a GTPase ;  
Prostaglandin Reductase 1 This gene en Functions as 15-oxo-prostaglandin 13-re  
Tubulin Tyrosine Ligase Like : This gene en Polyglutamylase which preferentially mo  
Cyclin Dependent Kinase 19 This gene encodes a protein that is one of the compo  
Centrosomal Protein 68 Involved in maintenance of centrosome  
Cytoplasmic FMR1 Interacting This gene en Component of the CYFIP1-EIF4E-FMR1  
Proteasome Activator Subunit 4 Associated component of the proteasom  
Tripartite Motif Containing 2 The protein ε UBE2D1-dependent E3 ubiquitin-protein  
Mannosidase Alpha Class 2B Member 2  
KH And NYN Domain Contain This gene encodes a protein containing a ribonucleas  
HAUS Augmin Like Complex : HAUS5 is 1 c Contributes to mitotic spindle assembly,  
Pleckstrin And Sec7 Domain Containing 3 Guanine nucleotide exchange factor for  
Coactosin Like F-Actin Bindin This gene en Binds to F-actin in a calcium-independe  
Neuronal Calcium Sensor 1 This gene is . Neuronal calcium sensor, regulator of G  
NODAL Modulator 1 This gene en May antagonize Nodal signaling.  
Ribosomal Protein L13a Ribosomes, 1 Associated with ribosomes but is not rec  
Coronin 1C This gene en [Isoform 3]: Involved in myogenic differe  
CD2 Associated Protein This gene en Seems to act as an adapter protein betw  
Makorin Ring Finger Protein 1 This gene en E3 ubiquitin ligase catalyzing the covale  
Family With Sequence Similarity 89 Membe Negatively regulates TGF-beta-induced  
LDOC1 Regulator Of NFKB S The protein ε May have an important role in the devel  
Phospholipase D Family Mem This gene en 5'->3' DNA exonuclease which digests s  
Solute Carrier Family 7 Memb This gene en Sodium-independent, high-affinity excha  
MAF BZIP Transcription Fact The protein ε Since they lack a putative transactivator  
Apolipoprotein L2 This gene is . May affect the movement of lipids in the  
BCL2 Like 13 This gene en May promote the activation of caspase-3  
F-Box And Leucine Rich Rep This gene en Calcium-activated substrate recognition  
Dynein Axonemal Heavy Chai This gene en Force generating protein of cilia requirec  
Signal Induced Proliferation Associated 1 L Stimulates the GTPase activity of RAP2.  
RAB11 Family Interacting Protein 5 Rab effector involved in protein traffickin  
Retinoic Acid Induced 14 Plays a role in actin regulation at the ect  
Retrotransposon Gag Like 8A  
Tectonic Family Member 3 This gene en Part of the tectonic-like complex which is  
PHD Finger Protein 19 Polycomb group (PcG) that specifically t  
RIB43A Domain With Coiled-Coils 2  
F-Box And WD Repeat Doma This gene en Substrate-recognition component of a C

|                                                |                                           |                                             |
|------------------------------------------------|-------------------------------------------|---------------------------------------------|
| F-Box Protein 22                               | This gene en                              | Substrate-recognition component of the      |
| F-Box Protein 5                                | This gene en                              | Regulator of APC activity during mitotic ;  |
| Seizure Related 6 Homolog L                    | This gene en                              | May contribute to specialized endoplasm     |
| Gremlin 1, DAN Family BMP /                    | This gene en                              | Cytokine that may play an important role    |
| STEAP Family Member 1                          | This gene is                              | Metalloreductase that has the ability to r  |
| Ankyrin Repeat Domain 1                        | The protein ε                             | May play an important role in endothelia    |
| Staufen Double-Stranded RN                     | Staufen hom                               | RNA-binding protein required for the mic    |
| Forkhead Box P1                                | This gene be                              | [Isoform 8]: Involved in transcriptional re |
| Solute Carrier Organic Anion Transporter F     | Mediates the                              | Na(+)-independent transpc                   |
| Adipogenesis Associated Mth938 Domain (        | May play a role in                        | preadipocyte different                      |
| Intraflagellar Transport 81                    | The protein ε                             | Component of the intraflagellar transpor    |
| Tropomodulin 3                                 |                                           | Blocks the elongation and depolymeriza      |
| Caspase Recruitment Domair                     | The caspase                               | Activates NF-kappa-B via BCL10 and IK       |
| Parvin Beta                                    | This gene en                              | Adapter protein that plays a role in integ  |
| Zinc Finger DHHC-Type Containing 1             | Could also be involved in                 | DNA virus-trig                              |
| RNA Binding Motif Protein 15                   | Members of 1                              | RNA-binding protein that acts as a key r    |
| Oxidative Stress Induced Gro                   | This gene en                              | Regulates the differentiation and prolifer  |
| Cerebellar Degeneration Related Protein 2 Like |                                           |                                             |
| Carbohydrate Sulfotransferas                   | The protein ε                             | Catalyzes the transfer of sulfate to positi |
| Anoctamin 7                                    | This prostate                             | Has calcium-dependent phospholipid sc       |
| Adenylate Kinase 3                             | The protein ε                             | Involved in maintaining the homeostasis     |
| UBX Domain Protein 1                           |                                           | Ubiquitin-binding protein that plays a rol  |
| Zinc Finger DHHC-Type Palm                     | This gene en                              | The ZDHHC9-GOLGA7 complex is a pa           |
| Inhibitor Of Growth Family Me                  | This gene en                              | Component of HBO1 complexes, which          |
| Cerebral Endothelial Cell Adhesion Molecu      | Probable cell                             | adhesion protein involved                   |
| Golgi Membrane Protein 1                       | The Golgi co                              | Unknown. Cellular response protein to v     |
| Mex-3 RNA Binding Family M                     | This gene en                              | E3 ubiquitin ligase responsible for the pc  |
| Sorting Nexin 7                                | This gene en                              | May be involved in several stages of intr   |
| Eukaryotic Translation Initiation Factor 3 S   | (Microbial infection)                     | In case of FCV infec                        |
| Protein Kinase AMP-Activatec                   | AMP-activate                              | AMP/ATP-binding subunit of AMP-activa       |
| Ubiquitin Conjugating Enzyme                   | The modifica                              | Catalyzes the covalent attachment of ub     |
| LIM Domain And Actin Bindin                    | This gene en                              | Actin-binding protein involved in actin cy  |
| CXXC Finger Protein 5                          | The protein ε                             | May indirectly participate in activation of |
| CutA Divalent Cation Tolerance Homolog         | May form part of a complex of membran     |                                             |
| Yippee Like 5                                  |                                           | Component of the CTLH E3 ubiquitin-pr       |
| Store-Operated Calcium Entry Associated f      | Negative regulator of store-operated Ca   |                                             |
| Nemo Like Kinase                               | Serine/threonine-protein kinase that regi |                                             |
| Calcium Binding Protein 39                     |                                           | Component of a complex that binds and       |



Regulator Of Telomere Elongation: This gene encodes an ATP-dependent DNA helicase implicated in telomere maintenance.  
 Endoplasmic Reticulum Aminopeptidase: The protein is an aminopeptidase that plays a central role in protein processing in the ER.  
 Transmembrane 7 Superfamily Member 3: Involved in the inhibition of cytokine-induced signaling.  
 SIX Homeobox 4: This gene encodes a transcriptional regulator which can act as a repressor or activator.  
 Phosphorylated Adaptor For RNA Export: A phosphoprotein adapter involved in the export of pre-mRNAs from the nucleus.  
 Casein Kinase 1 Gamma 1: This gene encodes a serine/threonine-protein kinase. Casein kinase I gamma 1 is involved in the regulation of cell cycle and transcription.  
 Alpha 1,4-Galactosyltransferase (Microbial infection) Globotriaosylceramidase: The protein is a glycosyltransferase that plays a role in the synthesis of globotriaosylceramide.  
 ERBB Receptor Feedback Inhibitor 1: ERRF1 is a negative regulator of EGFR signaling in the cytoplasm.  
 Chromosome 11 Open Reading Frame 71: This gene encodes a protein of unknown function.  
 Ubiquitin Specific Peptidase 53: Tight junction-associated protein that is involved in the ubiquitination of E-cadherin.  
 Coiled-Coil Alpha-Helical Rod Protein: This gene encodes a protein that may be a regulator of keratinocyte proliferation.  
 Exocyst Complex Component 1: The protein is a component of the exocyst complex involved in vesicle trafficking.  
 Roundabout Guidance Receptor 4: Receptor for Slit proteins, at least for SLIT1 and SLIT2.  
 Leucine Zipper Transcription Factor 1: This gene encodes a transcription factor that regulates ciliary localization of the BBS1 protein.  
 Tripartite Motif Containing 44: This gene encodes a protein that may play a role in the process of differentiation.  
 Basophilic Nuclear Protein 2: This gene encodes a probable transcription factor specific for B-lymphocytes.  
 Vacuolar Protein Sorting 13 Homolog: This gene encodes a protein necessary for proper mitochondrial function.  
 Retinol Saturase: Catalyzes the saturation of all-trans-retinol to all-trans-retinol.  
 Focadhesin: Potential tumor suppressor in gliomas.  
 Ubiquitin Conjugating Enzyme 1: Accepts ubiquitin from the E1 complex and mediates ubiquitination.  
 Dual Specificity Phosphatase 23: Protein phosphatase that mediates dephosphorylation of tyrosine and serine/threonine residues.  
 Transmembrane Protein 160: This gene encodes a protein of unknown function.  
 Gem Nuclear Organellar Scaffold Protein 1: The protein is part of the SMN complex and plays a catalytic role in the assembly of the spliceosome.  
 CLN6 Transmembrane ER Protein: This gene is one of eight which have been associated with the CLN6 gene.  
 Transmembrane Protein 51: This gene encodes a protein of unknown function.  
 Transmembrane Protein 38B: This gene encodes a monovalent cation channel required for the function of the Na<sup>+</sup>/K<sup>+</sup> ATPase.  
 NAD Synthetase 1: Nicotinamide adenine dinucleotide synthetase catalyzes the ATP-dependent amidation of nicotinamide.  
 Microtubule Associated Protein 1S: Microtubule-associated protein that mediates microtubule dynamics.  
 Zinc Finger Protein 532: May be involved in transcriptional regulation.  
 Prolyl 3-Hydroxylase 2: This gene encodes a prolyl 3-hydroxylase that catalyzes the hydroxylation of prolyl residues.  
 Exonuclease 3'-5' Domain Containing 2: Exonuclease that has both 3'-5' and 5'-3' exonuclease activity.  
 Ubiquitin Like Modifier Activator 1: Activates ubiquitin by first adenylating its C-terminus.  
 Transmembrane Protein 144: This gene encodes a protein of unknown function.  
 Shiftless Antiviral Inhibitor Of Ribosomal Frame Shift: Inhibits programmed -1 ribosomal frame shifts.  
 Phosphatidylinositol 4-Kinase Phosphatidylinositol Membrane-bound phosphatidylinositol-4-kinase.  
 Polypeptide N-Acetylgalactosyltransferase: This gene encodes a transferase that catalyzes the initial reaction in O-linked glycosylation.  
 Autophagy And Beclin 1 Regulator 1: Regulates autophagy and development.  
 Chromodomain Helicase DNA Binding Protein: This gene encodes a probable transcription regulator. Maybe involved in DNA replication and repair.

BTB Domain Containing 2 The C-terminus of the protein encoded by this gene b

VPS35 Retromer Complex Cc This gene be (Microbial infection) The heterotrimeric r

Transmembrane Protein 30A Accessory component of a P4-ATPase f

FYVE, RhoGEF And PH Domain Containin May activate CDC42, a member of the F

ELL Associated Factor 2 Acts as a transcriptional transactivator o

Protocadherin Gamma Subfa This gene is Potential calcium-dependent cell-adhesi

Protocadherin Gamma Subfa This gene is Potential calcium-dependent cell-adhesi

SERTA Domain Containing 4

Brain Expressed X-Linked 4 This gene is May play a role in microtubule deacetyla

CTP Synthase 2 The protein ε Catalyzes the ATP-dependent aminator

Carbohydrate Sulfotransferas This gene is Sulfotransferase that utilizes 3'-phospho

Formin 2 This gene is Actin-binding protein that is involved in a

Follistatin Like 5

1-Acylglycerol-3-Phosphate O The protein ε Converts 1-acyl-sn-glycerol-3-phosphate

MAP3K7 C-Terminal Like

Aryl Hydrocarbon Receptor Ni This gene en Transcriptional activator which forms a c

VPS35 Endosomal Protein Sorting Factor L (Microbial infection) The heterotrimeric r

Charged Multivesicular Body ICHMP1B bel Probable peripherally associated compo

Arginyl Aminopeptidase Like 1 Broad specificity aminopeptidase which

Pellino E3 Ubiquitin Protein Ligase 1 E3 ubiquitin ligase catalyzing the covale

Aspartate Beta-Hydroxylase Domain Conta May function as 2-oxoglutarate-depende

Ral GTPase Activating Protein Catalytic Su Catalytic subunit of the heterodimeric R

Reticulocalbin 3 Probable molecular chaperone assisting

SPC25 Component Of NDC8( This gene en Acts as a component of the essential kir

Extended Synaptotagmin 2 Tethers the endoplasmic reticulum to the

HECT, C2 And WW Domain ( This gene en E3 ubiquitin-protein ligase that mediates

Neutral Cholesterol Ester Hydrolase 1 Hydrolyzes 2-acetyl monoalkylglycerol e

Signal Induced Proliferation A This gene encodes a member of the signal-induced p

Dedicator Of Cytokinesis 6 This gene en Acts as guanine nucleotide exchange fa

Protocadherin 10 This gene be Potential calcium-dependent cell-adhesi

Cilia And Flagella Associated Protein 97

Zinc Finger And BTB Domain Containing 4 Transcriptional repressor with bimodal D

Ectopic P-Granules Autophag This gene en Involved in autophagy. May play a role ir

Microtubule Affinity Regulatinç This gene en Serine/threonine-protein kinase (PubMe

C-X-C Motif Chemokine Ligand 16 Acts as a scavenger receptor on macroç

Talin Rod Domain Containing This gene en Actin-binding protein which may have ar

Calcium Voltage-Gated Chanı Voltage-depeç Regulates the activity of L-type calcium i

Pleckstrin Homology Domain This gene en Binds specifically to phosphatidylinositol

Solute Carrier Family 25 Mem This gene en Mitochondrial transporter mediating uptake  
Zinc Finger AN1-Type Containing 3

Roundabout Guidance Recep This gene is . Thought to be involved during neural de

CAMP Responsive Element B This gene en Transcription factor involved in unfolded

Fibronectin Type III Domain Containing 3B May be a positive regulator of adipogene

Ceramide Kinase CERK conve Catalyzes specifically the phosphorylatic

Required For Meiotic Nuclear Division 5 Ho Core component of the CTLH E3 ubiquit

Ubiquitin Specific Peptidase 4 Modification Deubiquitinating enzyme that plays a rol

RAS Protein Activator Like 3 This gene be Functions as a Ras GTPase-activating p

Transmembrane Protein 237 The protein e Component of the transition zone in prin

KRI1 Homolog This gene overlaps with the gene for cysteine endope

Acetoacetyl-CoA Synthetase Activates acetoacetate to acetoacetyl-Co

GID Complex Subunit 4 Homc The multiprol Substrate-recognition subunit of the CTL

Transmembrane Protein 106C

DNA Replication And Sister C CHTF18 (MII Loads PCNA onto primed templates reg

Basic Helix-Loop-Helix Family This gene en Transcriptional repressor involved in the

Sperm Associated Antigen 16 Cilia and flag Necessary for sperm flagellar function. F

Chondroitin Polymerizing Factor Has both beta-1,3-glucuronic acid and b

FAT Atypical Cadherin 4 The protein e Cadherins are calcium-dependent cell a

Dynein Cytoplasmic 2 Heavy This gene en May function as a motor for intraflagellar

Chromosome 11 Open Reading Frame 80 [Isoform 3]: Component of a topoisomer

E2F Transcription Factor 8 This gene en Atypical E2F transcription factor that par

Thrombospondin Type 1 Domain Containin Promotes FBN1 matrix assembly. Attenu

Family With Sequence Similarity 110 Member D

Stearoyl-CoA Desaturase 5 Stearoyl-CoA Stearyl-CoA desaturase that utilizes O(2

DSN1 Component Of MIS12 I This gene en Part of the MIS12 complex which is requ

Solute Carrier Family 8 Memb SLC24A6 be Mitochondrial sodium/calcium antiporter

MYC Target 1 May regulate certain MYC target genes,

Coiled-Coil Domain Containing 92

WD Repeat Domain 26 This gene en G-beta-like protein involved in cell signal

Phosphatidylinositol Glycan A The glycosyl; Mannosyltransferase involved in glycosy

Phosphatidylinositol-3,4,5-Tris The protein e Functions as a RAC1 guanine nucleotid

Potassium Voltage-Gated Ch: This gene en Regulatory subunit of Kv4/D (Shal)-type

Tweety Family Member 3 This gene en Probable large-conductance Ca(2+)-acti

Collagen Type XVIII Alpha 1 ( This gene en [Non-collagenous domain 1]: May regul

C-Maf Inducing Protein This gene en Plays a role in T-cell signaling pathway.

SH3 Binding Domain Protein 5 Like Functions as guanine nucleotide exchan

Integrin Alpha FG-GAP Repeat Containing Modulator of T-cell function. Has a prote

Glycerophosphodiester Phosphatase 1 This gene encodes a substrate recognition component of a Serine Threonine Kinase complex that regulates maturation and trafficking of tetraspanin 14.

Tetraspanin 14 Regulates maturation and trafficking of tetraspanin 14.

Transcription Factor 7 Like 1 This gene encodes a transcription factor that participates in the Wnt signaling pathway.

Plasmalemma Vesicle Associated Protein Endothelial cell-specific membrane protein that binds to the cytoskeleton.

Allograft Inflammatory Factor 1 Like Actin-binding protein that promotes actin filament assembly.

MARVEL Domain Containing 1 Microtubule-associated protein that exhibits microtubule-binding activity.

Armadillo Repeat Containing 1 This gene encodes a protein that may play a role in cell survival and cell growth.

Transmembrane O-Mannosyltransferase TETRA1 Transfers mannosyl residues to the hydroxyl group of N-acetylglucosamine 6-phosphate on N-glycans.

UDP-GlcNAc:BetaGalactose 4-Epimerase Beta-1,3-N-acetylglucosaminyltransferase 1 This gene encodes a protein required for proper homologous chromosome segregation.

Meiotic Nuclear Divisions 1 The product of this gene is required for proper homologous chromosome segregation.

FAM161 Centrosomal Protein This gene encodes a protein involved in ciliogenesis.

Calpain Small Subunit 2 Calcium-regulated non-lysosomal thiol-protease that is involved in cell death and differentiation.

Peroxiredoxin Like 2A Involved in redox regulation of the cell (FAM161).

Cysteine Rich Transmembrane Module Containing 1 This gene encodes a protein involved in the costimulatory signaling pathway.

Caspase Recruitment Domain 1 The protein encoded by this gene is involved in the costimulatory signaling pathway.

Zinc Finger Protein 528 May be involved in transcriptional regulation.

Minichromosome Maintenance Complex Component 9 The protein encoded by this gene is a component of the MCM8-MCM9 complex.

Par-6 Family Cell Polarity Regulator Gamma Adapter protein involved in asymmetric cell division.

Collagen Type XXV Alpha 1 C This gene encodes a type I collagen that inhibits fibrillization of amyloid-beta peptide.

GTP Binding Protein 3, Mitochondrial This locus encodes a GTPase involved in the 5-carboxymethylglutamate decarboxylase pathway.

Pleckstrin Homology Domain Containing A1 Cargo transport protein that is required for the transport of cargo.

Phospholipase C Delta 4 This gene encodes a phospholipase that acts as a non-receptor guanine nucleotide exchange factor.

4-Hydroxyphenylpyruvate Dioxygenase Like 1 May have dioxygenase activity.

Transmembrane Protein 25 In neurons, modulates the degradation of tau protein.

R-Spondin 3 This gene encodes an activator of the canonical Wnt signaling pathway.

Transmembrane O-Mannosyltransferase TETRA1 Transfers mannosyl residues to the hydroxyl group of N-acetylglucosamine 6-phosphate on N-glycans.

Zinc And Ring Finger 1 This gene encodes an E3 ubiquitin-protein ligase that mediates ubiquitination of substrate proteins.

Centrosomal Protein 19 The protein encoded by this gene is required for ciliation (PubMed:2862556).

Small Integral Membrane Protein 3 This gene encodes a protein that plays a role during the calcification of cartilage.

Collagen Type XXVII Alpha 1 This gene encodes a type I collagen that plays a role during the calcification of cartilage.

Progesterin And AdipoQ Receptor Family Member 1 Plasma membrane progesterone (P4) receptor that acts as a transcriptional co-repressor.

Helicase With Zinc Finger 2 The protein encoded by this gene is a helicase that acts as a transcriptional co-repressor.

Tankyrase 1 Binding Protein 1 This gene encodes a protein that possesses 3' to 5' helicase activity and is involved in the regulation of cell morphology.

Neuron Navigator 2 This gene encodes a protein that possesses 3' to 5' helicase activity and is involved in the regulation of cell morphology.

SEC11 Homolog C, Signal Peptidase Complex Component of the microsomal signal peptidase complex.

Zinc Finger Protein 697 May be involved in transcriptional regulation.

Formin Like 3 The protein encoded by this gene plays a role in the regulation of cell morphology.

Coiled-Coil Domain Containing 74B

Sorting Nexin 29

Zinc Finger Protein 585B

May be involved in transcriptional regula

TRAF Interacting Protein With This gene en Adapter molecule that plays a key role ir

Family With Sequence Simila The protein ε May play a role in neuronal cell developi

Coiled-Coil Domain Containing 102A

Zinc Finger Protein 561

May be involved in transcriptional regula

Phospholipase C Delta 3 This gene en Hydrolyzes the phosphatidylinositol 4,5-l

Potassium Channel Tetramerization Domai Auxiliary subunit of GABA-B receptors th

Protein-L-Isoaspartate (D-Aspartate) O-Methyltransferase Domain Containing 1

FCH And Mu Domain Containing Endocytic Functions in an early step of clathrin-me

Heat Shock Protein Family A The protein encoded by this gene contains an atypica

Solute Carrier Family 18 Mem This gene encodes a protein, which has high sequenc

Signal Peptide Peptidase Like 3

Intramembrane-cleaving aspartic protea

CKLF Like MARVEL Transme This gene belongs to the chemokine-like factor gene ;

Major Facilitator Superfamily Domain Containing 12

Galactose Mutarotase

This gene en Mutarotase that catalyzes the interconve

Discoidin, CUB And LCCL Domain Containing 2

Glycerate Kinase

This locus encodes a member of the glycerate kinase

Junction Mediating And Regulatory Protein. Acts both as a nuclear p53/TP53-cofact

Transmembrane Protein 171

Peptidase M20 Domain Containing 2

Spindlin Family Member 4

Exhibits H3K4me3-binding activity.

NIMA Related Kinase 7

NIMA-related Protein kinase which plays an important

Mindbomb E3 Ubiquitin Protei The protein ε E3 ubiquitin-protein ligase that mediates

Eukaryotic Translation Initiation Factor 3 Subunit L Pseudogene 2

Low Density Lipoprotein Receptor Class A May influence APP processing, resulting

ST13, Hsp70 Interacting Protein Pseudogene 5

High Mobility Group AT-Hook 1 Pseudogene 3

Magnesium Dependent Phosphatase 1

Magnesium-dependent phosphatase wh

Toll Like Receptor Adaptor M This gene en Involved in innate immunity against inva

Zinc Finger Protein 827

May be involved in transcriptional regula

Shisa Family Member 3

This gene en Plays an essential role in the maturation

CREB3 Regulatory Factor

Acts as a negative regulator of the endo

CNKSR Family Member 3

Involved in transepithelial sodium transp

GTPase, IMAP Family Memb This gene en Exerts an anti-apoptotic effect in the inm

Transmembrane Protein 65

May play an important role in cardiac de

Ubiquitin Specific Peptidase 54

Has no peptidase activity.

Sprouty Related EVH1 Domai The protein ε Tyrosine kinase substrate that inhibits g  
 Zinc Finger Protein 846 May be involved in transcriptional regula  
 Zinc Finger Protein 579 May be involved in transcriptional regula  
 Family With Sequence Similarity 171 Member B  
 Secretory Carrier Membrane Protein 5 Required for the calcium-dependent exo  
 Apolipoprotein B MRNA Editir This gene is DNA deaminase (cytidine deaminase) w  
 Sprouty Related EVH1 Domai SPRED2 is a Negatively regulates Ras signaling path  
 Centrosomal Protein 112 This gene encodes a coiled-coil domain containing pr  
 Solute Carrier Family 25 Mem This gene encodes a member of the mitochondrial ca  
 Tripartite Motif Family Like 2 This gene encodes a member of the tri-partite motif (1  
 Dehydrogenase/Reductase X-Linked Involved in the positive regulation of star  
 Zinc Finger CCHC-Type Containing 24  
 Solute Carrier Family 37 Member 2 Inorganic phosphate and glucose-6-pho:  
 Zinc Finger Protein 438 Isoform 1 acts as a transcriptional repre:  
 ZNF22 Antisense RNA 1  
 Receptor Accessory Protein 3 Microtubule-binding protein required to ε  
 Jumonji Domain Containing 1 The protein ε Probable histone demethylase that spec  
 Family With Sequence Similarity 171 Memt Involved in the regulation of the cytoskel  
 Sidekick Cell Adhesion Molec The protein ε Adhesion molecule that promotes lamin:  
 Proline Rich 15 May have a role in proliferation and/or di  
 Ankyrin Repeat Domain 18A  
 Zinc Finger DHHC-Type Palmitoyltransfera: Palmitoyltransferase that mediates palm  
 Ring Finger Protein 144B E3 ubiquitin-protein ligase which accepts  
 Sorting Nexin 33 The protein ε Plays a role in the reorganization of the  
 Phosphoglucomutase 2 Like 1 Glucose 1,6-bisphosphate synthase usir  
 Otogelin Like The protein encoded by this gene belongs to the otog  
 Exocyst Complex Component 3 Like 1 As part of the exocyst, may play a role ir  
 Neuropeptide W The product ε Plays a regulatory role in the organizatio  
 Family With Sequence Similarity 171 Member A2  
 Potassium Channel Tetrameri This gene en May repress the transcriptional activity o  
 WD Repeat Domain 62 This gene is Required for cerebral cortical developme  
 Ring Finger Protein 149 E3 ubiquitin-protein ligase. Ubiquitinates  
 Sulfatase Modifying Factor 1 This gene en Oxidase that catalyzes the conversion o  
 Proline Rich Transmembrane Protein 3  
 Ring Finger Protein 180 E3 ubiquitin-protein ligase which promot  
 Protein Phosphatase, Mg2+/M This gene encodes the serine/threonine protein phosph  
 RAB43, Member RAS Oncogene Family The small GTPases Rab are key regulat  
 Zinc Finger Protein 260 Transcription factor that acts as a cardia

Solute Carrier Family 35 Member E4 Putative transporter.

Phosphogluconate Dehydrogenase Pseudogene 1

Heterogeneous Nuclear Ribonucleoprotein May play a role in nucleosome assembly

Transmembrane Protein 255B

Major Histocompatibility Complex, Class I, V (Pseudogene)

Zinc Finger Protein 710 May be involved in transcriptional regula

Sterile Alpha Motif Domain Containing 5

Ferric Chelate Reductase 1 Members of 1 Ferric-chelate reductases reduce Fe(3+)

Chromosome 4 Open Reading Frame 48

Long Intergenic Non-Protein Coding RNA 997

Matrix Remodeling Associated 7

Eukaryotic Translation Initiatic This gene en (Microbial infection) Plays a role in modu

Ankyrin Repeat Domain 18B

NOTCH Regulated Ankyrin Repeat Protein Downstream effector of Notch signaling.

Retrotransposon Gag Like 8B

Acyl-CoA Thioesterase 1 Acyl-CoA thioesterases are a group of e

Small Integral Membrane Protein 15

Microtubule Associated Protein 1 Light Cha Ubiquitin-like modifier involved in format

Histidine Rich Carboxyl Terminus 1

Phosphatidylethanolamine Binding Protein 1 Pseudogene 2

LYPLA2 Pseudogene 1

Modulator Of Smoothened Acts as a negative regulator of hedgeho

RELT Like 1 Induces activation of MAPK14/p38 casc

SLC25A21 Antisense RNA 1

Jumonji Domain Containing 7 This gene en Bifunctional enzyme that acts both as ar

MicroRNA 1204 microRNAs (miRNAs) are short (20-24 nt) non-coding

HOXA Distal Transcript Antise This gene produces a long RNA in antisense to the H

PMF1-BGLAP Readthrough This locus represents naturally occurring read-through

Myocardial Zonula Adherens | This gene en Plays a role in cellular signaling via Rho-

RNA, U6 Small Nuclear 301, Pseudogene

Activin A Receptor Type 1B This gene en Transmembrane serine/threonine kinase

Acylphosphatase 1 This gene is . Its physiological role is not yet clear.

Adrenoceptor Alpha 1B Alpha-1-adre This alpha-adrenergic receptor mediates

Activated Leukocyte Cell Adh This gene en [Isoform 3]: Inhibits activities of membra

Aldehyde Dehydrogenase 1 F The protein ε Can convert/oxidize retinaldehyde to reti

Aldolase, Fructose-Bisphosph This gene encodes a member of the class I fructose-k

Angiogenin The protein ε Binds to actin on the surface of endothe

Amyloid Beta Precursor Prote The protein ε Putative function in synaptic vesicle exo

ATPase H<sup>+</sup> Transporting V0 ε This gene en Proton-conducting pore forming subunit  
Hyperpolarization Activated C The protein ε Hyperpolarization-activated ion channel  
Bone Morphogenetic Protein ( This gene en Induces cartilage and bone formation.  
BRCA1 DNA Repair Associat This gene en E3 ubiquitin-protein ligase that specific  
BRCA2 DNA Repair Associat Inherited mul Involved in double-strand break repair a  
Carbonic Anhydrase 12 Carbonic an Reversible hydration of carbon dioxide.  
Cbl Proto-Oncogene B This gene en E3 ubiquitin-protein ligase which accepts  
Cyclin A2 The protein ε Cyclin which controls both the G1/S and  
ATP Binding Cassette Subfan The protein ε Mediates hepatobiliary excretion of num  
Deoxycytidine Kinase Deoxycytidir Phosphorylates the deoxyribonucleoside  
Aldo-Keto Reductase Family This gene en Converts progesterone to its inactive for  
Translocase Of Inner Mitoch This transloc Mitochondrial intermembrane chaperone  
Dihydroorotate Dehydrogenas The protein ε Catalyzes the conversion of dihydroorot  
TRNA Aspartic Acid Methyltra This gene en Specifically methylates cytosine 38 in th  
Epithelial Membrane Protein 1  
Epidermal Growth Factor Rec This gene en Signaling adapter that controls various c  
FA Complementation Group C The Fanconi DNA repair protein that may operate in ε  
Galactosylceramidase This gene en Hydrolyzes the galactose ester bonds of  
Growth Hormone Receptor This gene en Isoform 2 up-regulates the production of  
Glycerol Kinase The protein ε Key enzyme in the regulation of glycerol  
Glutamate-Cysteine Ligase M Glutamate-cysteine ligase, also known as gamma-glu  
Golgin A1 The Golgi ap Involved in vesicular trafficking at the Gc  
Glutathione S-Transferase Al Cytosolic anc Conjugation of reduced glutathione to a  
H1.0 Linker Histone Histones are Histones H1 are necessary for the condi  
H2A.X Variant Histone Histones are Variant histone H2A which replaces con  
Hyaluronan Synthase 3 The protein ε Catalyzes the addition of GlcNAc or Glc  
Hepatocyte Growth Factor This gene en Potent mitogen for mature parenchymal  
High Mobility Group Box 2 This gene en Multifunctional protein with various roles  
High Mobility Group Nucleoso The protein ε Binds to the inner side of the nucleosom  
Homeobox D1 This gene is . Sequence-specific transcription factor w  
Insulin Like Growth Factor 2 This gene en Preptin undergoes glucose-mediated co  
Immunoglobulin Mu DNA Binc This gene en 5' to 3' helicase that unwinds RNA and L  
Inhibin Subunit Beta A This gene en Inhibins and activins inhibit and activate,  
Interferon Regulatory Factor ε This gene en Key transcriptional regulator of type I int  
Potassium Calcium-Activated MaxiK chann Regulatory subunit of the calcium activa  
Kinesin Family Member 11 This gene en Motor protein required for establishing a  
Kinesin Family Member C1 Minus end-directed microtubule-depend  
Lipase E, Hormone Sensitive The protein ε In adipose tissue and heart, it primarily f



Melanocortin 1 Receptor This intronless Receptor for MSH (alpha, beta and gamma)

Minichromosome Maintenance Complex Component 2 The protein epsilon Acts as component of the MCM2-7 complex

Minichromosome Maintenance Complex Component 3 The protein epsilon Acts as component of the MCM2-7 complex

Minichromosome Maintenance Complex Component 4 The protein epsilon Acts as component of the MCM2-7 complex

Meis Homeobox 1 Homeobox gene Acts as a transcriptional regulator of PAX6

Microsomal Glutathione S-Transferase 1 The MAPEG Conjugation of reduced glutathione to a variety of substrates

Matrix Metalloproteinase 16 Proteins of the MMP family Endopeptidase that degrades various connective tissue components

Molybdenum Cofactor Synthase Eukaryotic molybdenum cofactor synthase Acts as a sulfur carrier required for molybdenum cofactor biosynthesis

Metallothionein 1X Metallothioneins have a high content of cysteine residues

MutY DNA Glycosylase This gene encodes a protein involved in oxidative DNA damage repair

NADH:Ubiquinone Oxidoreductase Subunit 2 The protein epsilon Accessory subunit of the mitochondrial respiratory chain

NADH:Ubiquinone Oxidoreductase Subunit 3 Accessory subunit of the mitochondrial respiratory chain

NADH:Ubiquinone Oxidoreductase Core Subunit V2 Pseudogene 1

N-Ribosyl Dihydronicotinamide Synthase This gene encodes the enzyme apparently serves as a quinone reductase

Nitric Oxide Synthase 3 Nitric oxide synthase [isoform eNOS13C]: Lacks eNOS activity

Neuronal Cell Adhesion Molecule 1 Cell adhesion protein that is required for cell-cell interactions

Contactin 3 Contactins mediate cell surface interactions

Pericentrin The protein epsilon Integral component of the filamentous network

Phosphodiesterase 3A This gene encodes cyclic nucleotide phosphodiesterase with specificity for cAMP

Phosphoribosylformylglycinamidine Synthase Purines are synthesized from phosphoribosylformylglycinamidine synthase

ATP Binding Cassette Subfamily A Member 1 The membrane translocates drugs and phospholipids across membranes

Phosphorylase Kinase Regulatory Subunit b Phosphorylase b kinase catalyzes the phosphorylation of glycogen

Phosphorylase Kinase Catalytic Subunit Phosphorylase b Catalytic subunit of the phosphorylase b

Phosphatidylinositol Glycan A This gene encodes a protein involved in GPI anchor biosynthesis (Purification of GPI-anchored proteins)

Phosphatidylinositol Glycan A This gene encodes a protein involved in GPI-anchor biosynthesis through the transfer of glucose to the inositol ring

Phosphatidylinositol Glycan A This gene encodes a protein involved in GPI-anchor biosynthesis through the transfer of mannose to the inositol ring

Phospholipase C Like 1 (Inactive) Involved in an inositol phospholipid-based signaling pathway

Phosphomannomutase 1 Phosphomannomutase Involved in the synthesis of the GDP-mannose

Exosome Component 9 This gene encodes a non-catalytic component of the RNA exosome

Pinin, Desmosome Associated Protein Transcriptional activator binding to the E-cadherin promoter

DNA Polymerase Epsilon 2, A DNA polymerase Accessory component of the DNA polymerase epsilon

RNA Polymerase II Subunit G This gene encodes DNA-dependent RNA polymerase catalytic subunit

Proteasome 20S Subunit Alpha 1 The proteasome Component of the 20S core proteasome

RAD1 Checkpoint DNA Endonuclease This gene encodes a component of the 9-1-1 cell-cycle checkpoint

Peroxisomal Biogenesis Factor 1 This gene encodes a somewhat implicated in the biogenesis of peroxisomes

Rab Geranylgeranyltransferase This gene encodes Catalyzes the transfer of a geranylgeranyl pyrophosphate to Rab proteins

Replication Factor C Subunit 1 This gene encodes The elongation of primed DNA template

Replication Factor C Subunit 2 The elongation of primed DNA template

Replication Factor C Subunit - The elongation of primed DNA template;  
 Replication Factor C Subunit - This gene encodes the elongation of primed DNA template;  
 Small Nucleolar RNA, H/ACA Box 63  
 Replication Protein A3 As part of the heterotrimeric replication fork protection complex, it binds to the 3' end of the RNA primers and the 3' end of the DNA template.  
 Ribosomal Protein S29 Ribosomes, the organelles that catalyze protein synthesis.  
 Ribonucleotide Reductase Re This gene encodes the precursor necessary for DNA synthesis.  
 Syndecan 2 The protein encoded by this gene is a cell surface proteoglycan that bears heparan sulfate side chains.  
 Transformer 2 Beta Homolog This gene encodes a sequence-specific RNA-binding protein.  
 Serum/Glucocorticoid Induced Kinase This gene encodes a serine/threonine-protein kinase which is involved in the regulation of the cell cycle.  
 STIL Centriolar Assembly Protein This gene encodes an immediate-early gene. Plays an important role in the formation of the centrosome.  
 S-Phase Kinase Associated Protein 1 This gene encodes a substrate recognition component of a cyclin-dependent kinase complex.  
 Solute Carrier Family 1 Member 5 This gene encodes a sodium-dependent, high-affinity amino acid transporter.  
 Solute Carrier Family 1 Member 5 (Microbial infection) Acts as a cell surface receptor for the bacterium *Yersinia enterocolitica*.  
 Synuclein Alpha Alpha-synuclein. Neuronal protein that plays several roles in Parkinson's disease.  
 Small Nuclear Ribonucleoprotein Polypeptide 1 Involved in pre-mRNA splicing as component of the spliceosome.  
 Small Nuclear Ribonucleoprotein Polypeptide 2 The protein encoded by this gene plays a role in pre-mRNA splicing as component of the spliceosome.  
 Sperm Associated Antigen 4 The mammalian protein encoded by this gene is involved in spermatogenesis. Required for the development of the sperm tail.  
 SH3 And Cysteine Rich Domain Promotes expression of the ion channel protein *hHv1*.  
 Heat Shock Protein Family A Class B Member 1 The protein encoded by this gene has peptide-independent ATPase activity.  
 Syntaxin 1A This gene encodes a protein that plays an essential role in hormone and neurotransmitter release.  
 Suppressor Of Variegation 3-Like 1 This gene encodes a histone methyltransferase that specifically methylates histone H3.  
 Transgelin This gene encodes an actin cross-linking/gelling protein (By similarity).  
 Transcription Factor 7 This gene encodes a transcriptional activator involved in T-cell development.  
 Transcription Factor AP-4 Transcription factor that activates both viral and cellular promoters.  
 Transforming Growth Factor E This locus encodes a protein that binds to TGF-beta. Could be involved in the regulation of cell growth.  
 Thrombospondin 1 The protein encoded by this gene is an adhesive glycoprotein that mediates cell-cell and cell-matrix interactions.  
 Toll Like Receptor 4 The protein encoded by this gene cooperates with LY96 and CD14 to mediate the response to lipopolysaccharide.  
 Thymopoietin Through alternative splicing, this gene encodes two different proteins.  
 DNA Topoisomerase III Alpha This gene encodes a protein that releases the supercoiling and torsional stress from DNA.  
 Thioredoxin Reductase 1 The protein encoded by this gene is isoform 1 may possess glutaredoxin activity.  
 Uridine Phosphorylase 1 This gene encodes a catalyzes the reversible phosphorylytic cleavage of uridine.  
 Ubiquitin Specific Peptidase 1 This gene encodes a negative regulator of DNA damage repair.  
 ZFP36 Ring Finger Protein (Microbial infection) Negatively regulates the expression of the *Yersinia enterocolitica* *YopJ* protein.  
 Zinc Finger Protein 18 May be involved in transcriptional regulation.  
 Zinc Finger And BTB Domain Containing 2 May be involved in transcriptional regulation.  
 ALMS1 Centrosome And Basal Body Protein This gene encodes a protein involved in PCM1-dependent intracellular signaling.  
 Mal, T Cell Differentiation Protein This gene encodes an element of the machinery for repressing the expression of the *CD4* gene.  
 Hydroxysteroid 17-Beta Dehydrogenase In mice, the protein encoded by this gene is a NAD-dependent 17-beta-hydroxysteroid

YEATS Domain Containing 4 The protein ε Chromatin reader component of the NuA4  
Solute Carrier Family 7 Member 5 The heterodimer with SLC3A2 functions  
Chromatin Assembly Factor 1 Chromatin as Complex that is thought to mediate chro  
H2A Clustered Histone 20 Histones are Core component of nucleosome. Nucleo  
HIRA Interacting Protein 3 The HIRA pr May play a role in chromatin function an  
Regulator Of G Protein Signal This gene en Inhibits signal transduction by increasing  
Ficolin 3 Ficolins are ε May function in innate immunity through  
Phospholipid Phosphatase 1 The protein ε Magnesium-independent phospholipid p  
Stanniocalcin 2 This gene en Has an anti-hypocalcemic action on calc  
Jrk Helix-Turn-Helix Protein This gene en May bind DNA.  
Fucose-1-Phosphate Guanylyl-L-fucose is a Catalyzes the formation of GDP-L-fucos  
TNF Receptor Superfamily Me The protein ε Receptor for TNFSF11/RANKL/TRANCE  
Interleukin 18 Receptor 1 The protein ε Within the IL18 receptor complex, respo  
Solute Carrier Family 5 Member 6 Transports pantothenate, biotin and lipo  
Timeless Circadian Regulator The protein ε Plays an important role in the control of  
Small Nucleolar RNA, C/D Box 73A  
Ribosomal RNA Processing 9 This gene en Component of a nucleolar small nuclear  
Estrogen Receptor Binding Si This gene wε May participate in suppression of cell pr  
Serine/Threonine Kinase 17b Phosphorylates myosin light chains (By :  
SLC9A3 Regulator 2 This gene en Scaffold protein that connects plasma m  
Stomatin Like 1 May play a role in cholesterol transfer to  
ATPase H<sup>+</sup> Transporting V1 ε This gene en Catalytic subunit of the peripheral V1 co  
Mitochondrial Translation Rel The protein ε Mitochondrial peptide chain release fact  
Tubulin Tyrosine Ligase Like 4 Glutamylase which preferentially modifie  
Kinetochores Associated 1 This gene en Essential component of the mitotic chec  
Centriolar Coiled-Coil Protein 110 Necessary for centrosome duplication at  
KIAA0513  
DnaJ Heat Shock Protein Fan DNAJC6 bel Recruits HSPA8/HSC70 to clathrin-coate  
NUAK Family Kinase 1 Serine/threonine-protein kinase involved  
Telomere Maintenance 2 This gene en Regulator of the DNA damage response  
DENN Domain Containing 4B Guanine nucleotide exchange factor (GE  
DNA Cross-Link Repair 1A This gene en May be required for DNA interstrand cro  
Ring-Box 1 This locus er E3 ubiquitin ligase component of multipl  
Histone Deacetylase 6 Histones play Responsible for the deacetylation of lysi  
Chromatin Assembly Factor 1 Chromatin as Core component of the CAF-1 complex,  
ATP Binding Cassette Subfan This gene en Binds heme and porphyrins and functio  
Nuclear Receptor Subfamily 1 The protein ε Nuclear receptor that exhibits a ligand-d  
Cytochrome C Oxidase Copp Cytochrome Copper metallochaperone essential for t

Interleukin 18 Binding Protein The protein ε Isoform A binds to IL-18 and inhibits its :  
Tetraspanin 2 The protein ε May play a role in signalling in oligodenc  
FRY Microtubule Binding Protein Plays a crucial role in the structural integ  
Family With Sequence Similarity 13 Member A  
Lysophosphatidylcholine Acyltransferase 3 Acyltransferase which mediates the con  
Ring Finger Protein 41 This gene en Acts as E3 ubiquitin-protein ligase and r  
Protein Arginine Methyltransferase This gene be Methylates (mono and asymmetric dime  
M-Phase Phosphoprotein 9  
Flotillin 1 This gene en May act as a scaffolding protein within c  
DEXD-Box Helicase 39A This gene en [Isoform 1]: Involved in pre-mRNA splici  
Solute Carrier Family 35 Mem This gene en Probable sugar transporter.  
Deleted In Lymphocytic Leukemia 1 May act as a tumor suppressor.  
Amyloid Beta Precursor Prote The protein ε May modulate the internalization of amy  
T Cell Immune Regulator 1, A This gene en Part of the proton channel of V-ATPase  
Anaphase Promoting Comple ANAPC10 is Component of the anaphase promoting  
EMG1 N1-Specific Pseudouri This gene en S-adenosyl-L-methionine-dependent pse  
Transforming Acidic Coiled-C This gene en Plays a role in the microtubule-depende  
NOP56 Ribonucleoprotein Nop56p is a Involved in the early to middle stages of  
SIVA1 Apoptosis Inducing Fa This gene en Induces CD27-mediated apoptosis. Inhil  
Sperm Associated Antigen 5 This gene en Essential component of the mitotic spinc  
TATA-Box Binding Protein As Initiation of tr Functions as a component of the PCAF  
Periostin This gene en Induces cell attachment and spreading ε  
DNA Polymerase Delta 3, Acc This gene en Accessory component of both the DNA p  
Polo Like Kinase 4 This gene en Serine/threonine-protein kinase that play  
Retinoic Acid Induced 2 Retinoic acid plays a critical role in development, cellu  
IlvB Acetolactate Synthase Lil The protein ε Endoplasmic reticulum 2-OH acyl-CoA l  
Stonin 1 Endocytosis May be involved in the endocytic machir  
Cytochrome B561 Family Member D2 Two-heme-containing cytochrome that c  
ZW10 Interacting Kinetochore This gene en Part of the MIS12 complex, which is req  
Lysine Acetyltransferase 7 The protein ε Catalytic subunit of histone acetyltransfe  
DNA Meiotic Recombinase 1 This gene en May participate in meiotic recombination  
FIC Domain Protein Adenylyltransferase Protein that can both mediate the additic  
LSM6 Homolog, U6 Small Nu Sm-like prote Plays role in pre-mRNA splicing as comp  
Polynucleotide Kinase 3'-Pho This locus re Plays a key role in the repair of DNA dar  
Opa Interacting Protein 5 The protein ε Required for recruitment of CENPA to cε  
Exosome Component 8 This gene en Non-catalytic component of the RNA ex  
BTB Domain Containing 3 Acts as a key regulator of dendritic field  
Dickkopf WNT Signaling Path This gene en Antagonizes canonical Wnt signaling by

**PAX Interacting Protein 1** This gene is involved in DNA damage response and Calmodulin Binding Transcription activator. May act as tumor suppressor.

**Sulfatase 1** This gene encodes a protein that exhibits arylsulfatase activity and highly specific for 3-sulfatase.

**Spectrin Repeat Containing Nucleotide Binding Site** The protein is a multi-isomeric modular protein which forms a complex with DnaJ Heat Shock Protein Family (Hsp40) class B member 1. May play a role as co-chaperone of the protein.

**Non-SMC Condensin I Component** This gene encodes a regulatory subunit of the condensin complex.

**Exosome Component 2** Non-catalytic component of the RNA exosome.

**Integrin Subunit Beta 3** This gene encodes a transcription coregulator that can have a role in cell adhesion.

**Solute Carrier Family 44 Member 1** Choline transporter. May be involved in choline transport.

**ATP Binding Cassette Subfamily B Member 1** The membrane protein is a probable transporter which may play a role in ATP transport.

**Decaprenyl Diphosphate Synthase** The protein supplies decaprenyl diphosphate, the precursor for the synthesis of cardiolipins.

**Single Stranded DNA Binding Protein 1** This gene encodes a subunit of a protein complex that binds to single-stranded DNA.

**LSM5 Homolog, U6 Small Nuclear RNA** Sm-like protein. Plays role in pre-mRNA splicing as component of the spliceosome.

**Stromal Cell Derived Factor 2 Like 1**

**Interleukin 17 Receptor A** Interleukin 17 receptor for IL17A (PubMed:17911633, PMID:17911633).

**Claudin 15** This gene encodes a claudin function as major constituents of tight junctions.

**Rhomboid Domain Containing 3**

**Anti-Silencing Function 1A Histone H4K9me3 Demethylase** This gene encodes a histone chaperone that facilitates histone H4K9me3 demethylation.

**Mitochondrial Pyruvate Carrier 2** Mediates the uptake of pyruvate into mitochondria.

**Zinc Finger Protein 473** This gene encodes a protein involved in histone 3'-end pre-mRNA processing.

**Anaphase Promoting Complex Subunit 15** Component of the anaphase promoting complex.

**Acyl-CoA Thioesterase 11** This gene encodes a protein with an acyl-CoA thioesterase activity within the endoplasmic reticulum.

**F-Box And WD Repeat Domain Containing 4 Pseudogene 1**

**Family With Sequence Similarity 162 Member 1** Proposed to be involved in regulation of transcription.

**Translocase Of Inner Mitochondrial Membrane 1** This gene encodes a probable mitochondrial intermembrane protein.

**Small Nucleolar RNA, C/D Box 60**

**TRNA Methyltransferase 2 Human C** The protein may be involved in nucleic acid metabolism.

**MDM2 Binding Protein** This gene encodes a protein that inhibits cell migration in vitro and suppresses cell growth.

**Cell Death Inducing DFFA Like Effector B** Activates apoptosis.

**Sulfotransferase Family 1B Member 1** Sulfotransferase that utilizes 3'-phosphoadenylylated substrates.

**Transmembrane Protein 97** TMEM97 is an intracellular orphan receptor that binds to a variety of ligands.

**Tribbles Pseudokinase 2** This gene encodes a protein that interacts with MAPK kinases and regulates their activity.

**Mitochondrial Ribosomal Protein L16** Mammalian mitochondrial ribosomal proteins are encoded by nuclear genes.

**MAGE Family Member H1** This gene belongs to the non-CT (non cancer/testis) gene family.

**Asteroid Homolog 1** Possible role in EGF receptor signaling.

**Mitochondrial Ribosomal Protein L16** Mammalian mitochondrial ribosomal proteins are encoded by nuclear genes.

**ATPase Family AAA Domain Containing 1** A large family of proteins. May be a transcriptional coactivator of transcription factors.

**NADH:Ubiquinone Oxidoreductase 1** NADH:ubiquinone oxidoreductase. Involved in the assembly of mitochondrial complexes.

Translocase Of Inner Mitochondrial Membr: Participates in the translocation of transmembrane proteins.  
 Transmembrane Protein 208 This gene encodes a protein that may function as a negative regulator of cell growth.  
 N-6 Adenine-Specific DNA Methyltransferase This gene encodes a DNA methyltransferase that can methylate both DNA and RNA.  
 Non-SMC Condensin II Component 1 This gene encodes a regulatory subunit of the condensin-2 complex.  
 ALG5 Dolichyl-Phosphate Beta-Galactosyltransferase This gene encodes a member of the glycosyltransferase family.  
 PSMC3 Interacting Protein This gene encodes a protein that plays an important role in meiotic recombination.  
 GDP-Mannose 6-Phosphotransferase 1 This gene encodes a protein that catalyzes the formation of GDP-mannose.  
 ALG6 Alpha-1,3-Glucosyltransferase This gene encodes a protein that adds the first glucose residue to the lipid carrier.  
 DNA Replication Fork Stabilization Protein 1 This gene encodes a replisome component that maintains the DNA replication fork.  
 Solute Carrier Family 2 Member 1 This gene encodes an insulin-regulated facilitative hexose transporter.  
 Paired Immunoglobulin-Like Cell Surface Receptor 1 Cell signaling (Microbial infection) Acts as an entry co-receptor for HIV-1.  
 CXXC Finger Protein 1 This gene encodes a transcriptional activator that exhibits a zinc finger structure.  
 5', 3'-Nucleotidase, Cytosolic This gene encodes a protein that dephosphorylates the 5' and 2'(3')-phosphates of RNA.  
 RNA Polymerase I Subunit H This gene encodes a DNA-dependent RNA polymerase catalytic subunit.  
 Mitochondrial Transcription Termination Factor 1 Binds promoter DNA and regulates initiation of mitochondrial transcription.  
 TP53RK Binding Protein Component of the EKC/KEOPS complex.  
 Mediator Complex Subunit 31 Component of the Mediator complex, a transcriptional coactivator.  
 Ribosomal RNA Processing 1 This gene encodes a protein that co-purifies with human mitochondrial ribosomes.  
 Mitochondrial Ribosomal Protein Mammalian mitochondrial ribosomal proteins are encoded by nuclear genes.  
 Deoxyribose-Phosphate Aldolase Catalyzes a reversible aldol reaction between deoxyribose-5-phosphate and water.  
 Tubulin Epsilon 1 This gene encodes a member of the tubulin superfamily.  
 Heat Shock Protein Family A (Hsp70) Member 1 Component of the ribosome-associated protein complex.  
 Chemokine Like Factor The product of this gene (isoform 1) has chemotactic response in cells.  
 Nucleolar And Spindle Associated Protein 1 NUSAP1 is a Microtubule-associated protein with the nucleolar spindle apparatus.  
 Ankyrin Repeat Domain 39 This gene encodes a protein with multiple ankyrin repeat domains.  
 Cytochrome C Oxidase Assembly Factor C Required for the assembly of the mitochondrial cytochrome c oxidase complex.  
 Ankyrin Repeat And MYND Domain Containing 1 This gene encodes a protein with ankyrin repeat and MYND domains.  
 Cell Cycle Exit And Neuronal Differentiation The protein encoded by this gene is involved in neuronal differentiation.  
 Thioesterase Superfamily Member 6 This gene encodes a thioesterase superfamily member.  
 POP5 Homolog, Ribonuclease P/MRP Subunit Component of ribonuclease P, a protein complex involved in RNA processing.  
 Proteasome Maturation Protein 1 The protein encoded by this gene is a molecular chaperone essential for the assembly of the proteasome.  
 NOP16 Nucleolar Protein This gene encodes a protein that is localized to the nucleolus.  
 NCK Interacting Protein With Kinase This gene encodes a protein that has an important role in stress fiber formation.  
 JNK1/MAPK8 Associated Membrane Protein 1 May be a regulator of the duration of mitosis.  
 PHD Finger Protein 7 Spermatogonium May play a role in spermatogenesis.  
 Mitochondrial Fission Process 1 MTP18 is a protein involved in the mitochondrial division process.  
 Serrate, RNA Effector Molecule Acts as a mediator between the cap-binding protein and the poly(A) tail.  
 Peptidylprolyl Isomerase Like This gene encodes a protein involved in pre-mRNA splicing as a component of the spliceosome.

Mitochondrial Pyruvate Carrier The protein  $\epsilon$  Mediates the uptake of pyruvate into mitochondria  
 Heat Shock Protein Family B (Small) Member 1 Component of the IFT complex B requires  
 RNA Polymerase III Subunit  $\kappa$  This gene encodes DNA-dependent RNA polymerase catalytic subunit  
 Peptidylprolyl Isomerase Like This gene encodes PPIases accelerate the folding of proteins  
 MIS18 Kinetochores Protein A Required for recruitment of CENPA to centromeres  
 Cytochrome C, Somatic This gene encodes Electron carrier protein. The oxidized form is involved in  
 Ganglioside Induced Differentiation This gene encodes Regulates the mitochondrial network by  
 Solute Carrier Family 38 Member 2 Functions as a sodium-dependent amino acid transporter  
 Asparagine Synthetase Domain Containing 1  
 Nedd4 Family Interacting Protein 2 Activates HECT domain-containing E3 ubiquitin ligase  
 Abelson Helper Integration Site 1 This gene is involved in vesicle trafficking and requires  
 Zinc Finger CCHC-Type Containing 10  
 ERCC Excision Repair 6 Like, This gene encodes DNA helicase that acts as an essential component of  
 Ankyrin Repeat Domain 49 Induces HBG1 expression (PubMed:16111111)  
 Myotubularin Related Protein 10  
 Semaphorin 4C Cell surface receptor for PLXNB2 that plays a role in cell migration  
 Odr-4 GPCR Localization Factor Homolog May play a role in the trafficking of a subset of GPCRs  
 TIMELESS Interacting Protein The protein  $\epsilon$  Plays an important role in the control of cell cycle  
 Chromosome 1 Open Reading Frame 159  
 Mago Homolog B, Exon Junction Complex Required for pre-mRNA splicing as component of the  
 Fidgetin, Microtubule Severing Factor ATP-dependent microtubule severing protein  
 Misato Mitochondrial Distribution And Morphology Involved in the regulation of mitochondrial  
 Centromere Protein Q CENPQ is a component of the CENPA-CAD (nucleosome assembly factor) complex  
 Lines Homolog 1 The Drosophila segment polarity gene line encodes a protein that is related to  
 FA Complementation Group I The Fanconi Plays an essential role in the repair of DNA  
 Leucine Rich Repeat Containing 1  
 Ring Finger Protein 121 The protein encoded by this gene contains a RING finger domain  
 Meiosis Specific Nuclear Structure This gene encodes May play a role in the control of meiotic  
 Zinc Finger Protein 823 May be involved in transcriptional regulation  
 FAD Dependent Oxidoreductase This gene encodes Required for the assembly of the mitochondrial  
 Syntabulin Syntabulin/G Part of a kinesin motor-adaptor complex  
 LIM Zinc Finger Domain Containing 1 This gene encodes Adapter protein in a cytoplasmic complex  
 TRNA 5-Methylaminomethyl-2 This nuclear Catalyzes the 2-thiolation of uridine at the  
 Centrosomal Protein 72 The product is involved in the recruitment of key centrosomal  
 Spermatogenesis Associated This gene, or involved in the maintenance of both rod and  
 Centromere Protein J This gene encodes Plays an important role in cell division and  
 PDZ Binding Kinase This gene encodes Phosphorylates MAP kinase p38. See PubMed:16111111  
 Nuclear Transport Factor 2 Like The protein  $\epsilon$  Regulator of protein export for NES-containing proteins

Glycerophosphocholine Phosphodiesterase May be involved in the negative regulation of cell growth.

Peter Pan Homolog The protein ε May have a role in cell growth.

Pannexin 2 The protein ε Structural component of the gap junction.

Semaphorin 3G The transcript Has chemorepulsive activities for sympathetic neurons.

Dihydrouridine Synthase 3 Like Catalyzes the synthesis of dihydrouridine.

Single-Pass Membrane Protein With Coiled-Coil Domains 4

Short Chain Dehydrogenase/L This gene encodes a putative NADP-dependent oxidoreductase.

Ral Guanine Nucleotide Dissociation Stimulator 1 Guanine nucleotide exchange factor (GEF).

Putative Homeodomain Transcription Factor May play a role in transcription regulation.

Dolichylidiphosphatase 1 A similar gene is required for efficient N-glycosylation. Nucleus.

Chromosome 3 Open Reading Frame 14

STAM Binding Protein Like 1 Zinc metalloprotease that specifically cleaves lamin A.

Centrosomal Protein 126 Participates in cytokinesis (PubMed:19744444).

Phosphatidylinositol-3,4,5-Trisphosphate 3-OH Phosphatase The protein ε Functions as a RAC guanine nucleotide exchange factor.

Stromal Interaction Molecule 1 This gene is involved in mediating store-operated calcium entry.

UV Stimulated Scaffold Protein The protein ε Factor involved in transcription-coupled DNA damage signaling.

DEAD-Box Helicase 55 This gene encodes a probable ATP-binding RNA helicase.

LSM2 Homolog, U6 Small Nuclear Ribonucleoprotein A Plays role in pre-mRNA splicing as component of the spliceosome.

SRP Receptor Subunit Beta The protein ε Component of the SRP (signal recognition particle).

Phosphatidylcholine Transfer Protein Catalyzes the transfer of phosphatidylcholine.

Zinc Finger Protein 77 May be involved in transcriptional regulation.

NGG1 Interacting Factor 3 Like 1 May function as a transcriptional corepressor.

Short Coiled-Coil Protein This gene encodes a positive regulator of amino acid starvation response.

N-Terminal EF-Hand Calcium Binding Protein 1 Inhibits the interaction of APBA2 with ankyrin-1.

FKBP Prolyl Isomerase Like The protein ε May be involved in response to X-ray. Required for cell cycle arrest.

Claspin The product is required for checkpoint mediated cell cycle arrest.

Fidgetin Like 1 This gene encodes a protein involved in DNA double-strand break (DSB) repair.

Centromere Protein K CENPK is a component of the CENPA-CAD (nucleosome-associated domain).

Non-SMC Condensin I Complex Subunit 1 This gene encodes a regulatory subunit of the condensin complex.

Torsin Family 3 Member A

IKAROS Family Zinc Finger 4 Members of the IKAROS family are DNA-binding proteins that bind to the 5' ends of DNA.

Autophagy Related 3 This gene encodes an E2 conjugating enzyme required for the autophagy pathway.

Methyltransferase Like 17 May be a component of the mitochondrial DNA methyltransferase complex.

GIN5 Complex Subunit 3 This gene encodes a subunit of the GINS complex, which plays an essential role in DNA replication.

Nucleolar Protein 6 The nucleolus is a dense subnuclear membraneless organelle.

Homologous Recombination Factor With O DNA-binding protein involved in homologous recombination.

Aurora Kinase A And Ninein Interacting Protein DNA-binding protein that accumulates at the centromere.

Centromere Protein M The protein ε Component of the CENPA-NAC (nucleosome-associated domain).



ELOVL Fatty Acid Elongase 6 Fatty acid elc Catalyzes the first and rate-limiting react

Coiled-Coil-Helix-Coiled-Coil-Helix Domain Containing 7

Dehydrogenase/Reductase 11 Catalyzes the conversion of the 17-keto

Centromere Protein O This gene en Component of the CENPA-CAD (nucleo

Cysteine Rich With EGF Like Domains 2 Protein disulfide isomerase (By similarity

THO Complex 6 This gene en Acts as component of the THO subcomp

HAUS Augmin Like Complex This gene en Contributes to mitotic spindle assembly,

PAXIP1 Associated Glutamat C16ORF53 ( Its association with the histone methyltra

N-Alpha-Acetyltransferase 16, NatA Auxilia Auxillary subunit of the N-terminal acetyl

Polypeptide N-Acetylgalactos This gene en Catalyzes the initial reaction in O-linked

Chromosome 22 Open Reading Frame 46

Centromere Protein U The centrom: Component of the CENPA-NAC (nucleo

YrdC N6-Threonylcarbamoyltransferase Dc May regulate the activity of some transp

Suppressor Of Variegation 3-9 Homolog 2 Histone methyltransferase that specifica

SH3 Domain Containing 21

Transcription Elongation Factor, Mitochond Transcription elongation factor which inc

Gem Nuclear Organelle Asso The protein ε The SMN complex plays a catalyst role i

Gem Nuclear Organelle Asso GEMIN6 is p The SMN complex plays a catalyst role i

Centrosome And Spindle Polk This gene en May play a role in cell-cycle-dependent r

Ribonuclease P/MRP Subunit RPP21 is a p Component of ribonuclease P, a ribonuc

L-2-Hydroxyglutarate Dehydr This gene encodes L-2-hydroxyglutarate dehydrogen

Jade Family PHD Finger 1 Scaffold subunit of some HBO1 comple

RecQ Mediated Genome Inst RMI1 is a cor Essential component of the RMI comple

Semaphorin 6D Semaphorins Shows growth cone collapsing activity oi

UL16 Binding Protein 2 This gene en Binds and activates the KLRK1/NKG2D

Solute Carrier Family 35 Member G2 May play a role in cell proliferation.

THAP Domain Containing 7 Chromatin-associated, histone tail-bindin

Acidic Nuclear Phosphoprotein 32 Family M Histone chaperone that specifically med

Solute Carrier Family 25 Member 28 Mitochondrial iron transporter that medic

Aldo-Keto Reductase Family The protein ε Catalyzes the NADPH-dependent reduc

BRCA1 Interacting Protein C The protein ε DNA-dependent ATPase and 5' to 3' DN

Solute Carrier Family 10 Member 7 Involved in teeth and skeletal developme

ATR Interacting Protein This gene en Required for checkpoint signaling after L

UTP15 Small Subunit Processome Comp Ribosome biogenesis factor. Involved in

Cytosolic Iron-Sulfur Assembly Component Component of the cytosolic iron-sulfur p

Protein O-Mannose Kinase This gene en Protein O-mannose kinase that specifica

Transmembrane Protein 126 The protein encoded by this gene is a mitochondrial n

Zinc Finger CCHC-Type Containing 9 May down-regulate transcription mediate

SMC5-SMC6 Complex Localization Factor Plays a role in the DNA damage response

Eukaryotic Translation Initiation Factor 1A [ Plays a role into cellular response to oxidative stress

Transmembrane Protein 175 Organelle-specific potassium channel subunit

Ubiquinol-Cytochrome C Reductase This gene encodes a protein Required for the assembly of the ubiquinol-cytochrome c complex

Cms1 Ribosomal Small Subunit Homolog

DOT1 Like Histone Methyltransferase The protein is a histone methyltransferase. Methylates histone H3 lysine 9

SLX4 Structure-Specific Endonuclease This gene encodes a regulatory subunit that interacts with an endonuclease

Kelch Repeat And BTB Domain Containing Substrate-specific adapter of a BCR (BTB domain-containing protein 1)

Methylmalonyl-CoA Epimerase The product is methylmalonyl-CoA epimerase involved in the biosynthesis of odd-chain fatty acids

MPV17 Mitochondrial Inner Membrane Protein Required for the assembly and stability of the mitochondrial inner membrane

DEAD/H-Box Helicase 11 Like 2 (Pseudogene)

Long Intergenic Non-Protein Coding RNA 467

Glycerol-3-Phosphate Acyltransferase This gene encodes a protein Converts glycerol-3-phosphate to 1-acylglycerol-3-phosphate

Protein Phosphatase 1 Regulatory Subunit This gene encodes a protein Maintains low levels of EIF2S1 phosphorylation

ALG10 Alpha-1,2-Glucosyltransferase This gene encodes a protein Adds the third glucose residue to the lipid

Transmembrane Protein 128

Leucine Rich Repeat And Coiled-coil Domain Containing 1 This gene encodes a protein Required for the organization of the mitochondrial membrane

DIX Domain Containing 1 The protein is a positive effector of the Wnt signaling pathway

Centrosomal Protein 295 Centriole-enriched microtubule-binding protein

Keratin 8 Pseudogene 12

Kelch Like Family Member 13 This gene encodes a protein Substrate-specific adapter of a BCR (BTB domain-containing protein 1)

DDB1 And CUL4 Associated Factor 15 Binding of aryl sulfonamide anticancer drugs

Mediator Complex Subunit 30 The multi-protein complex Component of the Mediator complex, a co-repressor

LYR Motif Containing 7 Inner mitochondrial membrane Assembly factor required for Rieske Fe-S cluster assembly

Zinc Finger AN1-Type Containing 2A

Family With Sequence Similarity 104 Member B

Centrosomal Protein 95

Tripartite Motif Containing 41 This gene encodes a protein Functions as an E3 ligase that catalyzes ubiquitination

Chromosome 12 Open Reading Frame 29

Plexin A4 Coreceptor for SEMA3A. Necessary for cell adhesion and signaling

Lin-52 DREAM MuvB Core Complex Component

Ferredoxin-Fold Anticodon Binding Protein This gene encodes a protein which contains a ferredoxin-like domain

Transmembrane Protein 88 Inhibits the Wnt/beta-catenin signaling pathway

LMBR1 Domain Containing 2 Recruited to ligand-activated beta-2 adrenergic receptor

Proline Rich 29

Methionyl-tRNA Synthetase 2 This gene produces a mitochondrial methionyl-tRNA synthetase

HAUS Augmin Like Complex Subunit 1 Contributes to mitotic spindle assembly, chromosome segregation

Trans-L-3-Hydroxyproline Dehydrogenase The protein is a catalyzes the dehydration of trans-3-hydroxyproline

|                                                    |                                                            |
|----------------------------------------------------|------------------------------------------------------------|
| Mitochondrial Fission Regulator 2                  | May play a role in mitochondrial aerobic                   |
| Cell Division Cycle Associated 5                   | Regulator of sister chromatid cohesion in                  |
| Transmembrane Protein 106A                         | Activates macrophages and polarizes th                     |
| Target Of EGR1, Exonuclease                        | Inhibits cell growth rate and cell cycle. In               |
| Solute Carrier Family 25 Mem                       | The protein ε Calcium-dependent mitochondrial solute       |
| Serine/Threonine Kinase 11 Interacting Pro         | May regulate STK11/LKB1 function by c                      |
| Transmembrane Protein 123                          | This gene en Implicated in oncotic cell death, characte    |
| TLC Domain Containing 1                            | Regulates the composition and fluidity o                   |
| Centrobin, Centriole Duplicati                     | This gene en Required for centriole duplication. Inhibit   |
| Sideroflexin 2                                     | Mitochondrial amino-acid transporter the                   |
| Zinc Finger Protein 641                            | Transcriptional activator. Activates trans                 |
| AlkB Homolog 2, Alpha-Ketog                        | The Escheric Dioxygenase that repairs alkylated DNA        |
| Leucine Rich Repeat Protein                        | The protein ε May negatively regulate the 4-1BB-medi       |
| Centrosomal Protein 20                             | Involved in the biogenesis of cilia (PubM                  |
| Spermatogenesis Associated 33                      |                                                            |
| Chromosome 17 Open Reading Frame 49                | Component of chromatin complexes suc                       |
| Src Homology 2 Domain Containing E                 |                                                            |
| Fc Receptor Like B                                 | FCRL2 belongs to the Fc receptor family. Fc receptor:      |
| Rho Guanine Nucleotide Exch                        | Guanine nuc Acts as guanine nucleotide exchange fa         |
| Nucleoporin 35                                     | This gene en Functions as a component of the nuclea        |
| Chromosome 2 Open Reading Frame 76                 |                                                            |
| Tetratricopeptide Repeat Domain 32                 |                                                            |
| Zinc Finger AN1-Type Contain                       | This gene en Plays a role in protein homeostasis by re     |
| Coiled-Coil Domain Containing 58                   |                                                            |
| Chromosome 4 Open Reading Frame 33                 |                                                            |
| POC5 Centriolar Protein                            | Essential for the assembly of the distal l                 |
| Zinc Finger Protein 280B                           | The protein ε May function as a transcription factor.      |
| HECT Domain E3 Ubiquitin Protein Ligase            | Probable E3 ubiquitin-protein ligase whic                  |
| Mirror-Image Polydactyly 1                         | This gene encodes a coiled-coil domain-containing pr       |
| Essential Meiotic Structure-S                      | This gene en Interacts with MUS81 to form a DNA str        |
| Zinc Finger Protein 534                            | May be involved in transcriptional regula                  |
| SPC24 Component Of NDC80 Kinetochore               | Acts as a component of the essential kir                   |
| Dpy-19 Like C-Mannosyltransferase 3                | Probable C-mannosyltransferase that m                      |
| Solute Carrier Family 66 Member 1 Like             |                                                            |
| Nuclear Transcription Factor, X-Box Binding Like 1 |                                                            |
| Metallo-Beta-Lactamase Domain Containing 2         |                                                            |
| MARVEL Domain Containing                           | The protein ε Plays a role in the formation of tricellular |
| Retinoic Acid Early Transcript RAET1L belc         | Binds and activates the KLRK1/NKG2D                        |

## Coiled-Coil Domain Containing 167

Potassium Channel Tetramer This gene en May be involved in the control of excitab  
Family With Sequence Similarity 201 Member A

Solute Carrier Family 35 Mem This gene en May play a role in intracellular calcium s  
C-Type Lectin Domain Contai This gene encodes a member of the C-type lectin/C-t

PiggyBac Transposable Elem The piggyBac family of proteins, found in diverse anin  
Zinc Finger Protein 114 May be involved in transcriptional regula

SAS-6 Centriolar Assembly P The protein ε Central scaffolding component of the ce  
Coiled-Coil Domain Containing 138

THAP Domain Containing 5 Has sequence-specific DNA-binding acti  
GTPase, IMAP Family Memb This gene en The dimer has GTPase activity; the activ

Basic Helix-Loop-Helix Family Member A15 Plays a role in controlling the transcriptic  
Zinc Finger Protein 596 May be involved in transcriptional regula

ALG14 UDP-N-Acetylglucosa This gene is May be involved in protein N-glycosylatic  
Transmembrane Protein 201 [Isoform 2]: May define a distinct membr

Potassium Channel Tetramerization Domai Probable substrate-specific adapter of a  
Chromosome 4 Open Reading This gene encodes a small, conserved protein of unkr  
Transmembrane Protein 218 May be involved in ciliary biogenesis or i

Two Pore Segment Channel 2 This gene en Nicotinic acid adenine dinucleotide phos  
Spindle And Kinetochore Associated Comp Component of the SKA1 complex, a mic

Spindle And Kinetochore Ass This gene en Component of the SKA1 complex, a mic  
Chromosome 6 Open Reading Frame 136

Maturin, Neural Progenitor Differentiation R Promotes megakaryocyte differentiation  
Semaphorin 3D This gene en Induces the collapse and paralysis of ne

G-Patch Domain Containing 11

Ceramide Synthase 6 Ceramide synthase that catalyzes forma  
Bromodomain And WD Repe The protein ε Plays a role in the regulation of cell mor

ST6 N-Acetylgalactosaminide ST6GALNAC Involved in the biosynthesis of gangliosid  
Membrane Associated Guanylate Kinase, V Acts as a scaffolding protein at cell-cell j

Nephrocystin 4 This gene en Involved in the organization of apical jun  
Fucose Mutarotase Involved in the interconversion between

Tubulin Epsilon And Delta Complex 1 Acts as a positive regulator of ciliary hec  
TRNA Splicing Endonuclease This gene en Non-catalytic subunit of the tRNA-splicin

Chromosome 3 Open Reading Frame 70 May play a role in neuronal and neurobe  
Long Intergenic Non-Protein Coding RNA 632

Chromosome 1 Open Reading Frame 174

Brain Expressed X-Linked 5

Kinesin Family Member 24 This gene en Microtubule-dependent motor protein th

G Protein Subunit Gamma 5 Pseudogene 2

Cytosolic Thiouridylase Subunit This gene encodes a protein that plays a central role in the 2-thiolation of methionine.  
Zinc Finger Protein 530 May be involved in transcriptional regulation.

GEN1 Holliday Junction 5' Flap Endonuclease This gene encodes an endonuclease which resolves Holliday junctions.

Retinoic Acid Early Transcript This gene encodes a protein [Isoform 1]: Binds and activates the KLF1 transcription factor.

WASP Family Homolog 3, Pseudogene Acts as a nucleation-promoting factor at the leading edge of the cell.  
Chromosome 5 Open Reading Frame 34

Ring Finger Protein 148

C-Type Lectin Domain Family 12 Member 5 Cell surface receptor that protects target cells from apoptosis.

Zinc Finger Protein 324B May be involved in transcriptional regulation.

LysM Domain Containing 1

Small Integral Membrane Protein 26

Solute Carrier Family 25 Member 5 SLC25A35 belongs to the SLC25 family of mitochondrial translocases of the outer mitochondrial membrane.

Centromere Protein P CENPP is a component of the CENPA-CAD (nucleosome assembly factor) complex.

WAS Protein Homolog Associated With Actin, Golgi Membranes And Microtubules 1

TRNA-YW Synthesizing Protein Wybutosine 1 Probable component of the wybutosine synthetase complex.

CDGSH Iron Sulfur Domain 2 The protein encodes a regulator of autophagy that contributes to the formation of autophagosomes.

ChaC Glutathione Specific G-protein The protein encodes a catalase that catalyzes the cleavage of glutathione in the presence of hydrogen peroxide.

Double Homeobox A Pseudogene Homeobox genes encode DNA-binding proteins, many of which are transcription factors.

Small Nucleolar RNA, C/D Box 1 Small nucleolar RNAs (snoRNAs) of the C/D class, such as snoRNA 15, are involved in the modification of ribosomal RNA.

Ribosomal Protein L26 Pseudogene 30

WASP Family Homolog 7, Pseudogene

Small Nucleolar RNA, H/ACA Box 20

High Mobility Group Nucleosomal Binding Domain 2 Pseudogene 5

D-2-Hydroxyglutarate Dehydrogenase This gene encodes a catalase that catalyzes the oxidation of D-2-hydroxyglutarate to 2-oxoglutarate.

High Mobility Group Box 2 Pseudogene 1

Small Nucleolar RNA Host Gene 9

KTN1 Antisense RNA 1

Coiled-Coil Domain Containing 152

Chromosome 11 Open Reading Frame 91

Family With Sequence Similarity 27 Member E3

Zinc Finger Protein 587B May be involved in transcriptional regulation.

Transportin 1 Pseudogene 1

COX20 Pseudogene 1

MHC Class I Polypeptide-Related 1 This gene encodes a protein that seems to have no role in antigen presentation.

Endogenous Retrovirus Group K3 Member 1

MicroRNA 4512 microRNAs (miRNAs) are short (20-24 nt) non-coding RNA molecules that regulate gene expression.

MicroRNA 7161 microRNAs (miRNAs) are short (20-24 nt) non-coding

Karyopherin Subunit Alpha 2 The import of Functions in nuclear protein import as ar

Cerebellin 2 Precursor Acts as a synaptic organizer in specific s

DLG Associated Protein 5 Potential cell cycle regulator that may pl

Family With Sequence Similar This gene contains an intronless ORF that arose from

Zinc Finger Protein 737 May be involved in transcriptional regula

Kelch Like Family Member 3 This gene is Substrate-specific adapter of a BCR (BT

Rac GTPase Activating Protei This gene en Component of the centralspindlin compl

Anillin Actin Binding Protein This gene en Required for cytokinesis (PubMed:1604

Prickle Planar Cell Polarity Pr This gene en Involved in the planar cell polarity pathw

CD83 Molecule The protein e May play a significant role in antigen pre

TNF Alpha Induced Protein 3 This gene we Ubiquitin-editing enzyme that contains b

Janus Kinase 3 The protein e Non-receptor tyrosine kinase involved in

Ankyrin Repeat Family A Member 2 May regulate the interaction between the

NDC80 Kinetochore Complex This gene en Acts as a component of the essential kir

Kinesin Family Member 4B This gene is Iron-sulfur (Fe-S) cluster binding motor p

Serine Incorporator 5 Restriction factor required to restrict infe

TPX2 Microtubule Nucleation Factor Spindle assembly factor required for nor

Eukaryotic Translation Initiatic EIF4E3 below Recognizes and binds the 7-methylguan

Carbonic Anhydrase 13 Carbonic ant Reversible hydration of carbon dioxide.

Prickle Planar Cell Polarity Pr C6ORF49 is a member of the LIM domain protein fam

Laccase Domain Containing 1 This gene en Purine nucleoside enzyme that catalyze:

HIVEP Zinc Finger 1 This gene en This protein specifically binds to the DN/

Ecotropic Viral Integration Site 2B Required for granulocyte differentiation :

Vasoactive Intestinal Peptide The protein e PHM and PHV also cause vasodilation.

H4 Clustered Histone 8 Histones are Core component of nucleosome. Nuclec

Kinesin Family Member 14 This gene en Microtubule motor protein that binds to r

Proliferating Cell Nuclear Anti The protein e Auxiliary protein of DNA polymerase del

LYL1 Basic Helix-Loop-Helix I This gene represents a basic helix-loop-helix transcrip

MAM Domain Containing 4 Probably involved in the sorting and sele

Cyclin Dependent Kinase Like This gene is Mediates phosphorylation of MECP2 (Pt

MicroRNA 570 microRNAs (miRNAs) are short (20-24 nt) non-coding

Zinc Finger And BTB Domain Containing 2 Acts as a transcription repressor.

Interleukin 7 Receptor The protein e Receptor for interleukin-7. Also acts as a

Pituitary Tumor-Transforming 2

Peptide YY 2 (Pseudogene)

Baculoviral IAP Repeat Conta This gene is Multitasking protein that has dual roles ii

Semaphorin 3B The protein e Inhibits axonal extension by providing lo

Ankyrin Repeat Domain 26 Pseudogene 1

Cytoskeleton Associated Protein This gene encodes a protein that possesses microtubule stabilizing properties.  
Ubiquitin Specific Peptidase 49 Specifically deubiquitinates histone H2B

Zinc Finger And BTB Domain Containing 1: May be involved in transcriptional regulation

ADP Ribosylation Factor Like This gene encodes a protein that positively regulates SLC1A1/EAAC1-mediated transport.  
Autophagy Related 16 Like 2 May play a role in autophagy.

Cyclin B2 Cyclin B2 is essential for the control of the cell cycle

Cell Division Cycle 25C This gene encodes a protein that functions as a dosage-dependent inducer of cell cycle progression

Cell Division Cycle 25B CDC25B is a tyrosine protein phosphatase which functions in the regulation of cell cycle progression

Transmembrane Protein 223

Solute Carrier Family 45 Member 3

Proline Rich 11 Plays a critical role in cell cycle progression

TP53 Regulated Inhibitor Of Apoptosis 1 Involved in the modulation of the mitochondrial membrane potential

Farnesyl-Diphosphate Farnesyltransferase This gene encodes a protein that catalyzes the condensation of 2 farnesyl pyrophosphate molecules

NLR Family Pyrin Domain Containing 1 This gene encodes a protein that acts as the sensor component of the NLRP1 inflammasome

Family With Sequence Similarity 71 Member F2

Zinc Finger Protein 337 This gene encodes a protein that may be involved in transcriptional regulation

Biogenesis Of Lysosomal Organellar Membrane Protein 1 This gene encodes a protein that is a component of the BLOC-1 complex, a complex involved in the biogenesis of lysosomal organelles

Mevalonate Kinase This gene encodes a protein that catalyzes the phosphorylation of mevalonate

Golgin A8 Family Member O

Calcium Homeostasis Modulator Family Member 1 Pore-forming subunit of a voltage-gated calcium channel

XIAP Associated Factor 1 This gene encodes a protein that seems to function as a negative regulator of XIAP

Protein Regulator Of Cytokine This gene encodes a protein that is a key regulator of cytokinesis that cross-links microtubules

Frizzled Class Receptor 2 This intronless receptor for Wnt proteins. Most of frizzled proteins are transmembrane proteins

KCNJ2 Antisense RNA 1

MicroRNA 6775 microRNAs (miRNAs) are short (20-24 nt) non-coding RNA molecules that regulate gene expression

ADAM Metallopeptidase With Thrombospondin Type 1 Motifs This gene encodes a protein that cleaves the vWF multimers in plasma

COBWD Domain Containing 3

Family With Sequence Similarity 86 Member H, Pseudogene

DnaJ Heat Shock Protein Family (Hsp40) Member C18

Spectrin Repeat Containing Nuclear Envelope Protein 1 As a component of the LINC (Linker of Nucleoskeleton and Cytoskeleton) complex

Cytochrome P450 Family 51 Subfamily A Member 1 This gene encodes a cytochrome P450 monooxygenase involved in the metabolism of drugs

ESX Homeobox 1 This gene encodes a protein that may coordinately regulate cell cycle progression

Chromosome 5 Open Reading Frame 63

Calcium Responsive Transcription Factor Acts as a transcriptional activator that mediates the response to calcium

IZUMO Family Member 4

SWT1 RNA Endoribonuclease Homolog

Glucokinase Regulator This gene encodes a protein that regulates glucokinase (GCK) by forming a complex with it

Kelch Like Family Member 4 This gene encodes a member of the kelch family of p  
LYN Proto-Oncogene, Src Fa This gene en Non-receptor tyrosine-protein kinase tha  
Lysophosphatidic Acid Recep The integral r Receptor for lysophosphatidic acid (LPA  
Oxysterol Binding Protein Like This gene en Regulates cellular transport and efflux o  
RNA, 7SL, Cytoplasmic 834, Pseudogene

Zinc Finger Protein 695 May be involved in transcriptional regula

Kinesin Family Member 20B Plus-end-directed motor enzyme that is

Family With Sequence Similarity 95 Member B1

Ral GEF With PH Domain And SH3 Bindin Guanine nucleotide exchange factor (GE

Squalene Epoxidase Squalene ep Catalyzes the stereospecific oxidation of



ctor (GEF) for RhoA and RhoB GTPases.

ng mitosis required for condensin-depleted chromosomes to retain their compact architecture t  
own-regulates cell proliferation (in vitro). Promotes RAC1-dependent membrane ruffle formatic  
AB7A. Signal effector acting as a linker between RAC1 and RAB7A, leading to RAB7A inactiva  
major microtubule plus-end depolymerizing activity in mitotic cells (PubMed:21820309). Regul  
role in the incorporation and maintenance of histone H3-like variant CENPA at centromeres. A  
RAS-specific effector protein. May promote apoptosis and cell cycle arrest. Stabilizes STK3/MC  
toporphyrinogen-IX to form protoporphyrin-IX.

ascular endothelial growth factor A and interacts with exocyst complex component 4. The enco

-OGT complex that is required for the regulation of the transcriptional activity of RRM1.

n phosphate of phosphatidylinositol 3,4-bisphosphate, inositol 1,3,4-trisphosphate and inositol  
isor that negatively regulates the TORC1 signaling pathway through the GATOR complex. In at  
s the C-terminal tyrosine residue of alpha-tubulin, thereby regulating microtubule dynamics and  
it plays an ABL1-overlapping role in key processes linked to cell growth and survival such as cy  
rylate the 5'-hydroxyl groups of double-stranded RNA (dsRNA), single-stranded RNA (ssRNA),  
nt and proliferation of ovarian cancer cells so may be involved in these processes. May also pl  
nase activity that can prevent apoptosis, promote cell survival and protein translation. May cont  
or postsynaptic signaling. Inhibitory regulator of the Ras-cAMP pathway. Member of the NMDA  
ting GTP hydrolysis on RHOA, CDC42 and RAC1 small GTPases. May be involved in the diffe  
ein in all the mitochondrial P450 systems including cholesterol side chain cleavage in all steric  
ransport of the cationic amino acids (arginine, lysine and ornithine); the affinity for its substrate:  
sion of intracellular vesicles such as lysosomes (PubMed:11984006, PubMed:25216107). Migr  
tion.

ntrol of metaphase-to-anaphase transition.

isor that negatively regulates the TORC1 signaling pathway through the GATOR complex. In at

RNAs that are involved in post-transcriptional regulation of gene expression in multicellular org  
tion.

in type-1 family of proteins. Members of this family bind to the polyA tails of mRNAs to regulate  
luding leukotriene B4. Mediates chemotaxis of granulocytes and macrophages. The response i  
sm, and catalyzes the first step of phosphatidylethanolamine and phosphatidylcholine biosynthe  
A infection, serves as a post-attachment receptor for the virus to facilitate entry into the cell.||M

RNAs that are involved in post-transcriptional regulation of gene expression in multicellular org  
ls to the octamer motif (5'-ATTTGCAT-3'). Regulates transcription in a number of tissues in adk

normal myelination in the peripheral nervous system. It mediates adhesion between adjacent molecules and causes cell cycle arrest in G2/M phase by interfering with microtubule rearrangements that are required to enter mitosis.

UB1-CUL4-X-box) E3 ubiquitin-protein ligase complex required for cell cycle control, DNA damage response, and sequestering free syntaxin-1.

It is involved in various types of cell motility and is ubiquitously expressed in all eukaryotic cells.

It is involved in the formation of excitatory synapses through the recruitment of pre- and postsynaptic proteins. Organized in the cytoplasm.

It is involved in proliferation in retinal progenitor cells (RPCs) and promotes the production of symmetric terminal divisions.

It is involved in cell division.

It is involved in cell division and is induced by stressors generated by active metabolism or to counter adverse environmental conditions. Major protein in the cytoplasm.

It is involved in subdistal appendage assembly and microtubule anchoring in interphase cells (PubMed:284220).

It is involved in cell division and is induced by DNA infection, serving as a post-attachment receptor for the virus to facilitate entry into the cell. ||M

It is a dual specificity phosphatase active toward substrates containing either phosphotyrosine or phosphoserine. It binds to the cytoplasmic polyadenylation element (CPE), an uridine-rich sequence element in the 3' UTR of mRNAs.

It is involved in cell division. May play a role in spermatogenesis.

It is involved in cell division and is induced by DNA damage. It is a member of the p53-inducible protein family. In response to DNA damage, the encoded protein interacts with the p53 protein and acts as a transcription regulator. Regulates transcription from the PADI1 and CDH2 promoter. May be involved in cell division.

It is a cell-surface receptor for fibroblast growth factors and plays an essential role in the regulation of cell division. Negatively regulates neurite outgrowth (PubMed:17389905). Involved in the morphogenesis of neurons.

It is involved in cell division and is induced by DNA damage. It is a member of the p53-inducible protein family. Regulates transcription from the PADI1 and CDH2 promoter. May be involved in cell division.

It is involved in cell division and is induced by DNA damage. It is a member of the p53-inducible protein family. Regulates transcription from the PADI1 and CDH2 promoter. May be involved in cell division.

It is involved in cell division and is induced by DNA damage. It is a member of the p53-inducible protein family. Regulates transcription from the PADI1 and CDH2 promoter. May be involved in cell division.

It is involved in cell division and is induced by DNA damage. It is a member of the p53-inducible protein family. Regulates transcription from the PADI1 and CDH2 promoter. May be involved in cell division.

It is involved in cell division and is induced by DNA damage. It is a member of the p53-inducible protein family. Regulates transcription from the PADI1 and CDH2 promoter. May be involved in cell division.

It is involved in cell division and is induced by DNA damage. It is a member of the p53-inducible protein family. Regulates transcription from the PADI1 and CDH2 promoter. May be involved in cell division.

It is involved in cell division and is induced by DNA damage. It is a member of the p53-inducible protein family. Regulates transcription from the PADI1 and CDH2 promoter. May be involved in cell division.

It is involved in cell division and is induced by DNA damage. It is a member of the p53-inducible protein family. Regulates transcription from the PADI1 and CDH2 promoter. May be involved in cell division.

It is involved in cell division and is induced by DNA damage. It is a member of the p53-inducible protein family. Regulates transcription from the PADI1 and CDH2 promoter. May be involved in cell division.

It is involved in cell division and is induced by DNA damage. It is a member of the p53-inducible protein family. Regulates transcription from the PADI1 and CDH2 promoter. May be involved in cell division.

It is involved in cell division and is induced by DNA damage. It is a member of the p53-inducible protein family. Regulates transcription from the PADI1 and CDH2 promoter. May be involved in cell division.

It is involved in cell division and is induced by DNA damage. It is a member of the p53-inducible protein family. Regulates transcription from the PADI1 and CDH2 promoter. May be involved in cell division.

It is involved in cell division and is induced by DNA damage. It is a member of the p53-inducible protein family. Regulates transcription from the PADI1 and CDH2 promoter. May be involved in cell division.





or differentiation in response to extracellular signals.

t melanoma. It may exert its effects through interactions with the cytoskeleton.

r. Binds to the XRE promoter region of genes it activates (PubMed:10395741, PubMed:286028). Factors of intracellular membrane trafficking, from the formation of transport vesicles to their fusion

n dependent kinases and is essential for their biological function.

d in the transmission of signals from tyrosine kinase receptors and small GTPases to the actin c se that catalyzes the formation of retinoic acid (PubMed:27759097). Has high activity with all-tr on of Akt and PKC signaling. Mediates dephosphorylation in the C-terminal domain hydrophob SCF (SKP1-CUL1-F-box protein)-type E3 ubiquitin ligase complex.

osine kinase receptors. Concomitantly recruits ERBB1 and ERBB2 coreceptors, resulting in lig e expression of cytokine and chemokine genes in a wide variety of different cellular contexts. M

ation of alcohol-derived acetaldehyde (Probable). They are involved in the metabolism of cortic ates circadian rhythm and metabolic pathways in a heme-dependent manner. Integral compone

.A-3' (By similarity). Transcriptional repressor (By similarity). Activator of WNT-mediated transcri

ype lectin-like domain (CTL/CTLD) superfamily. Members of this family share a common protei CF-like ECS (Elongin BC-CUL2/5-SOCS-box protein) E3 ubiquitin-protein ligase complex which

ed to act as a specialized replication factor promoting DNA replication under conditions of repli

NOTCH proteins. Has been shown to amplify NOTCH-induced transcription of HES1.

rates its kinase activity thereby playing a central role in DNA replication and cell proliferation. R survival of cultured cerebellar granule neurons. May mediate homophilic as well as heterophilic

1 mitosis. Required for normal congress of chromosomes at the metaphase plate, and for norm teins within the membrane, to function as part of a cell-surface receptor.

ptor (TCR) signaling by direct dephosphorylation of the Src family kinases LCK and FYN, ITAM arrest of oocytes at the second meiotic metaphase until fertilization. Probably acts by inhibiting

pairing damaged DNA in a p53/TP53-dependent manner. Supplies deoxyribonucleotides for DN w affinity for GDP, and constitutively binds GTP. Controls rearrangements of the actin cytoskel

inocyclopropane-1-carboxylate but is capable of catalyzing the deamination of L-vinylglycine.

ein kinase involved in synaptic plasticity, centriole duplication and G1/S phase transition. Polo e (PAN) deadenylation complex, one of two cytoplasmic mRNA deadenylases involved in gener

for the apelin receptor (APLNR), an alternative coreceptor with CD4 for HIV-1 infection (PubMe an cancers. May be part of the regulatory mechanism in the development of epithelial tube net

volved in the formation of parallel microtubule bundles linked by cross-bridges in the proximal e uence NeuAc-alpha-2,3-Gal-beta-1,3-GalNAc- found on sugar chains O-linked to Thr or Ser ar

anemia (FA) core complex. Required for the normal activation of the FA pathway, leading to m e; subunit of the PRC2/EED-EZH1 complex, which methylates 'Lys-27' of histone H3, leading to

mineralization by regulating levels of diphosphate (PPi).

factor (GEF) for Rab5 GTPase. Regulates the ALS2-mediated endosome dynamics.

regulator of telomere length (PubMed:28500257, PubMed:28082411). Directly binds the telomere and enters into mitosis. Acts by participating in E3 ligase complexes that mediate the ubiquitination of telomerase. Acts with telomerase to form a sequence-specific DNA-binding protein complex which recognizes the core sequence of telomeric DNA. Promotes endothelial cell growth, stimulating their proliferation and migration. It binds to the receptor FLN1 and regulates its internalization at the plasma membrane through a cargo-specific control of clathrin-mediated endocytosis.

facilitates the obliteration of the intercellular space.

ubiquitin unit. It regulates the polymerase and exonuclease activities promoting processive DNA synthesis. Contains methylarginine and, to a much lesser extent, ornithine and histidine (PubMed:24652292). Contains

and mediates axon repulsion of neuronal growth cones in the developing nervous system. It acts as a linker between two centrioles, required for centrosome cohesion.

transcription factor HIF1A to bind to hypoxia-responsive elements (HRE) located within the enhancer region of a cell adhesion molecule complex that mediates an initial attachment of the blastocyst to the CNS.

containing a medium length fatty acid chain to the corresponding monoacylglycerol. Has high specificity for

multiple snoRNA host gene family. Two snoRNAs are derived from the introns of this host gene. Also acts as a precursor of N-acetylneuraminic acid (NeuAc), a precursor of sialic acids. Plays an essential role in early development. Activates the JNK, but not ERK or p38 kinase pathways.

helicase required for the maintenance of both mitochondrial and nuclear genome stability. Efforts are being made to act as a non-canonical poly(A) RNA polymerase.

ter. May catalyze the transport of monocarboxylates across the plasma membrane.

part of the cullin-RING-based BCR (BTB-CUL3-RBX1) E3 ubiquitin-protein ligase complex. The BCR(Kelch domain), a sugar that is part of the carbohydrates that are attached to cellular glycoproteins. Catalyzes transcription among the neighboring LOC101735302 (stromal antigen 3 pseudogene), LOC101929282, and LOC101929283. Contribute to lamellipodia formation.

some distal) complex, a complex recruited to centromeres which is involved in assembly of kinetochore. Part of the RASSF domain family (RASSF) of tumor suppressor proteins. This gene is essential for maintaining adenylylation-sensitive signal transduction machinery in sperm to a calcium-permeable ion channel.

metabolic sensor by regulating the expression of genes involved in bile acid synthesis, cholesterol metabolism, and

neutrophils, basophils, and T-cells, but not monocytes. It is also involved in neutrophil activation. Proteins with these repeats may form scaffolds for protein-protein interaction and play key roles in cell adhesion and signaling.

PI3K signaling. Represses AKT1 by preventing AKT1-binding to membrane lipids, thereby inhibiting the ubiquitination of p53/TP53, leading to its degradation by the proteasome. Inhibits p53/TP53- and

integrin and metalloproteinase with thrombospondin motifs) protein family. Members of the family bind specifically to the MEF2 element, 5'-YTA[AT](4)TAR-3', found in numerous muscle-specific genes in monocytes but not neutrophils. Activates the C-X-C chemokine receptor CXCR4 to induce calcium ion entry. Its activity is increased by reduction in extracellular osmolarity, by store depletion

in muscle-expressed genes. May play a role in hematopoiesis (By similarity).

hydrolyzes preferentially the transfer of ATP and GTP on RNA 3' poly(A) tail creating a heterogeneous population of transcripts. Regulates transcription between the neighboring SLX1A (SLX1 structure-specific endonuclease subunit) and SLX1B (SLX1B structure-specific endonuclease subunit). Regulates T-cell responses. Can function as costimulator and lower the threshold for T-cell activation. Binds specifically to the MEF2 element present in the regulatory regions of many muscle-specific genes. (PubMed:22132193, PubMed:25355627). Mediates positive transcriptional regulation of several cell cycle factors to general transcription apparatus and thereby modulates transcription regulation and chromatin structure.

Specifically captures and shuttles two lipid second messengers, i.e., phosphatidylinositol 4,5- bisphosphate (PIP2) and phosphatidylinositol 3-phosphate (PIP3) in coupled to G proteins that stimulate phosphoinositide hydrolysis. May play a role in platelets and in apoptosis, not only caspases and apoptosis, but also modulates inflammatory signaling and immunity, mitochondrial reactive oxygen species metabolism. May participate in cell growth regulation.

May act downstream of CDC42 to induce actin filament assembly leading to cell migration.

Small non-coding RNAs that are involved in post-transcriptional regulation of gene expression in multicellular organisms. May be anchored to another protein, or free (unanchored). When covalently bound, it is conjugated to target protein.

Part of the pre-replicative complex (MCM complex) which is the putative replicative helicase essential for 'once per cell cycle' DNA replication. Family capable of binding GTP or GDP. G proteins are activated by binding GTP and are inactive when bound to GDP, which is a key regulator of many important physiological processes.

Protein complex which can transport nucleotide analogs. Heme transporter required for the translocation of heme into the cytoplasm. Plays a role in the maturation and acidification of phagosomes that engulf pathogens, such as bacteria. May be involved in microtubule arrays during cell elongation.

fic obliteration of the intercellular space, through calcium-independent cell-adhesion activity. Inter molecule FADD recruits caspase-8 to the activated receptor. The resulting death-inducing signal is the removal of the leader peptide from proteins containing a PTS2 target sequence and protein translocation as a transcriptional corepressor. The DEPDC1A-ZNF224 complex may play a critical role in the ubiquitination of E2 ubiquitin-conjugating enzyme in the form of a thioester and then directly promote intra-flagellar transport, and tail assembly. Binds, in a GTP-regulated manner, to a specific

of closely packed pairs of transmembrane channels, the connexons, through which materials of various sizes pass. Binds a GC box motif. Could play a role in B-cell growth and development.

is a cation channel inhibited by the diuretic amiloride. Mediates the electrodiffusion of the luminal sodium ions. Is a receptor for human herpesvirus 6B/HHV-6B. Receptor for TNFSF4/OX40L/GP34. Is a costimulatory molecule. Could be a molecular link between myofibrillar stretch-induced signaling pathways and muscle

protein (5hmC), suggesting that it acts as a specific reader of 5hmC.

performs several important functions throughout M phase of the cell cycle, including the regulation of the centromere and kinetochore attachment of the chromosomal passenger complex (CPC), a complex that acts as a key regulator of mitosis. Is involved in insulin signaling and regulates metabolic homeostasis in response to oxidative stress (Pulmonary). Promotes the normal organization of enamel.

is a DNA binding domain) which negatively regulates the basic helix-loop-helix (bHLH) transcription factor. Binds to the E-box element (canonical) core consensus DNA sequence 5'-CANNTG-3' known as an E-box element, p

is involved in mRNA turnover and in nonsense-mediated mRNA decay. May remove the KIF14 localization to the central spindle and midbody. Putative RHO/RAC effector that binds to the RHO/RAC GTPase. DNA binding domain) which negatively regulates the basic helix-loop-helix (bHLH) transcription factor. Binds to a wide number of exogenous and endogenous hydrophobic electrophiles. Has a sulfatase activity. Promotes neuronal responses by binding to the catalytic domain of calcineurin A. Could play a role during cerebellar development. Neuromodulator in a broad array of neuronal functions directed toward the regulation of goal-directed

apoptosis. Promotes mitochondrial membrane changes and efflux of apoptogenic proteins from the

transcription. Require a bHLH protein for their transcription.

is involved in cell proliferation. Essential for chromosome alignment. Involved in the first two steps in lysine degradation. The N-terminal and the C-terminal contain lysine-ketoglutarate

is involved in cell proliferation. Not essential for development but affects cell adhesion and cell migration. Acts as an inhibitor of cellular as well as viral processes, cell migration, proliferation, signaling, and cell death.





adation by interacting with COP1 ubiquitin ligase (PubMed:27041596). The COP1-binding motif  
esion during mitosis by preventing premature dissociation of cohesin complex from centromere  
um channels by preventing the interaction between their alpha and beta subunits. Thereby, neg  
tiarrhythmia via the strong suppression of voltage-gated L-type Ca(2+) currents. Regulates volt  
ted on Ser, Thr, and Tyr residues and low molecular weight phosphatase substrate para-nitrop

hromosomes dispersed in the cytoplasm following nuclear envelope disassembly (PubMed:273  
ating factors are cytokines that act in hematopoiesis by controlling the production, differentiator  
ytosis of vesicles filled with neurotransmitters and neuropeptides. Probably acts upstream of fu  
d in developmental processes of a variety of tissues and organs, including the heart and coron  
osome-mediated cell-cell adhesion.

lle required for faithful chromosome segregation and progression into anaphase (PubMed:1966

ε/threonine-protein kinase that is implicated in cell spreading and migration, cell survival, cell gr

neuron-restrictive silencer element (NRSE), with lower affinity than full-length REST isoform 1  
. repair.||[Isoform D2]: Inhibits UV-damaged DNA repair.||Protein, which is both involved in DNA

ponsive element from the cellular retinol-binding protein II promoter (CRBP-II-RXRE). Inhibits th  
regulates adhesion- and motility-associated genes such as NFKB2 and ICAM1. Exhibits oppos  
3 MAPKs by inhibiting p38 phosphorylation and activity (By similarity). Might affect PCNA intere

paran sulfate. May fulfill a function related to the motile behaviors of developing neurons (By sir  
ε forming with the TGF-beta type II serine/threonine kinase receptor, TGFBR2, the non-promisc  
nities around large joints. More than 90% of cases have a recurrent and specific chromosomal

development. Specifically demethylates dimethylated 'Lys-9' and 'Lys-27' (H3K9me2 and H3K2  
ΔRF6. Plays a role in clathrin-dependent endocytosis. May play a role in erythropoiesis (By simi  
nal repressor in association with BCL6. May function in a narrow stage or be related to some e  
s (BMP) signaling which is required for growth and patterning of the neural tube and somite. Es  
methylates 'Lys-9' of histone H3, thereby playing a central role in histone code. Preferentially d  
-surface receptor for the cytokine KITLG/SCF and plays an essential role in the regulation of ce  
represents a non-protein coding RNA. Alternatively spliced transcript variants have been found f  
i N-box motifs: 5'-CACNAG-3' (By similarity).

eam open reading frame (uORF) of DDIT3/CHOP that is specifically produced in absence of st

ubiquitin from an E2 ubiquitin-conjugating enzyme in the form of a thioester and then directly to ubiquitin. It is involved in the metabolism of long-chain fatty acids as well as longer chain fatty acids required for optimal mitochondrial function.

generate phosphatidic acid (PA). May regulate the activity of protein kinase C by controlling the activity of phospholipase C (PLC) (PubMed:24286120). Functions in innate immunity and more specifically the inflammatory response as a

damaged by oxidation or by mutagenic agents. Acts as DNA glycosylase that recognizes and removes

plays an important cytoskeletal role within the muscle cell cytoskeleton. It forms heteropolymers with other proteins (such as collagenases) and irreversibly inactivates them by binding to their catalytic zinc cofactor. It is regulated by a group of at least six microRNAs (miRNAs) that may be involved in cell survival, proliferation, and

required for the mitogen or stress-induced phosphorylation of the transcription factors CREB1 and CREB2. Contains a serine peptidase domain in the C-terminus. Mutations in this gene are associated with an autoimmune

miRNAs that are involved in post-transcriptional regulation of gene expression in multicellular organisms. Acts as a genetic regulator by bridging DNA methylation and chromatin modification. Specifically recognizes and binds to closely packed pairs of transmembrane channels, the connexons, through which materials of various sizes pass during signaling cascades. Inhibits signal transduction by increasing the GTPase activity of G protein alpha subunit. Plays a key role in various developmental processes such as myogenesis and brain development. Plays a key role in cell proliferation.

miRNAs that are involved in post-transcriptional regulation of gene expression in multicellular organisms. Acts as a genetic regulator by bridging DNA methylation and chromatin modification. Specifically recognizes and binds to closely packed pairs of transmembrane channels, the connexons, through which materials of various sizes pass during signaling cascades. Inhibits signal transduction by increasing the GTPase activity of G protein alpha subunit. Plays a key role in various developmental processes such as myogenesis and brain development. Plays a key role in cell proliferation.

maintenance of immune tolerance to self (PubMed:11015443, PubMed:28813417, PubMed:28813418). Involved in F-beta signaling and thereby probably plays a role in cell proliferation, differentiation, apoptosis and

miRNAs that are involved in post-transcriptional regulation of gene expression in multicellular organisms. Acts as a genetic regulator of spermatogenesis. Acts by regulating expression of genes required for the haploid phase of spermatogenesis. Acts as a genetic regulator by bridging DNA methylation and chromatin modification. Specifically recognizes and binds to closely packed pairs of transmembrane channels, the connexons, through which materials of various sizes pass during signaling cascades. Inhibits signal transduction by increasing the GTPase activity of G protein alpha subunit. Plays a key role in various developmental processes such as myogenesis and brain development. Plays a key role in cell proliferation. Acts as a tumor suppressor in many cell types. Reduces both Fe(3+) to Fe(2+) and Cu(2+) to Cu(1+). Uses NAD(+) as acceptor (By similarity).

ulates cell motility proliferation and muscle-response to insulin (PubMed:15817639, PubMed:21111111).

quired for receptor recycling from endosomes, both to the trans-Golgi network and the plasma membrane.

Involved in the metabolism of all-trans retinoic acid (atRA), a signaling molecule that binds to retinoid receptors.

ion potential waveform and excitability of neuronal and muscle tissues. Inward rectifier potassium channels mediate homophilic cell adhesion in a calcium-independent manner (By similarity). Plays a role in cell division.

May be acting by homooligomerizing within the membrane and forming pores (PubMed:27111111). Plays a central role in genetic recombination and DNA repair by promoting the annealing of complementary DNA strands.

Its major role may be to transduce signals from the major microtubule plus-end depolymerizing activity in mitotic cells. Its major role may be to transduce signals from the major microtubule plus-end depolymerizing activity in mitotic cells.

Its major role may be to transduce signals from the major microtubule plus-end depolymerizing activity in mitotic cells. Its major role may be to transduce signals from the major microtubule plus-end depolymerizing activity in mitotic cells.

Its major role may be to transduce signals from the major microtubule plus-end depolymerizing activity in mitotic cells. Its major role may be to transduce signals from the major microtubule plus-end depolymerizing activity in mitotic cells.

Its major role may be to transduce signals from the major microtubule plus-end depolymerizing activity in mitotic cells. Its major role may be to transduce signals from the major microtubule plus-end depolymerizing activity in mitotic cells.

Its major role may be to transduce signals from the major microtubule plus-end depolymerizing activity in mitotic cells. Its major role may be to transduce signals from the major microtubule plus-end depolymerizing activity in mitotic cells.

Its major role may be to transduce signals from the major microtubule plus-end depolymerizing activity in mitotic cells. Its major role may be to transduce signals from the major microtubule plus-end depolymerizing activity in mitotic cells.

Its major role may be to transduce signals from the major microtubule plus-end depolymerizing activity in mitotic cells. Its major role may be to transduce signals from the major microtubule plus-end depolymerizing activity in mitotic cells.

Its major role may be to transduce signals from the major microtubule plus-end depolymerizing activity in mitotic cells. Its major role may be to transduce signals from the major microtubule plus-end depolymerizing activity in mitotic cells.

Its major role may be to transduce signals from the major microtubule plus-end depolymerizing activity in mitotic cells. Its major role may be to transduce signals from the major microtubule plus-end depolymerizing activity in mitotic cells.

Its major role may be to transduce signals from the major microtubule plus-end depolymerizing activity in mitotic cells. Its major role may be to transduce signals from the major microtubule plus-end depolymerizing activity in mitotic cells.

Its major role may be to transduce signals from the major microtubule plus-end depolymerizing activity in mitotic cells. Its major role may be to transduce signals from the major microtubule plus-end depolymerizing activity in mitotic cells.

Its major role may be to transduce signals from the major microtubule plus-end depolymerizing activity in mitotic cells. Its major role may be to transduce signals from the major microtubule plus-end depolymerizing activity in mitotic cells.

Its major role may be to transduce signals from the major microtubule plus-end depolymerizing activity in mitotic cells. Its major role may be to transduce signals from the major microtubule plus-end depolymerizing activity in mitotic cells.

h R- and S-2-methyl-C15-CoA.

is a receptor for fibronectin (PubMed:1918072). It recognizes the sequence R-G-D in its ligand. Donutase involved in the breakdown of the nucleus during corneocyte formation of epidermal keratinocytes. A family of small RNAs that are involved in post-transcriptional regulation of gene expression in multicellular organisms. Found in all eukaryotic fluids by a wide variety of exocrine and endocrine organs (PubMed:2251263, PubMed:1124126). A family of multiprotein PRC1-like complex, a complex class required to maintain the transcriptionally repressed state of nucleosomes. Contains ultimate amino acid residues except L-proline.

regulates and modulates MYC expression by binding to its promoter in a sequence-specific manner. Associates with the NoRC (nucleolar remodeling complex) complex and plays a key role in repressing the MYC promoter. Inhibits the IFRSF1A signaling pathway that leads to NF-kappa-B activation and is required for cell survival. Acts as a cell cycle checkpoint. Required for normal mitosis progression. The mitotic checkpoint delays anaphase until all chromosomes are aligned at the metaphase plate. Performs 2 crucial functions during mitosis: it is essential for spindle-assembly checkpoint signaling and for chromosome segregation.

Complex (ORC) that binds origins of replication. DNA-binding is ATP-dependent. The DNA sequence recognized is 5'-AATTC-3'. Inhibits 1-specific proteases. Studies in mouse determined that Ufsp1 releases Ufm1 (ubiquitin-fold modifier 1) which is involved in the regulation of the immune system. Inhibits the activity of heteromeric cohesin from separase-mediated cleavage in oocytes specifically during meiosis I. Has a role in the regulation of the cell cycle promoter elements. Activates the transcription of these genes.

Complex (some distal) complex, a complex recruited to centromeres which is involved in assembly of kinetochores. Plays a role in the establishment of DNA methylation patterns during development. Plays a role in chromosome congression by reducing the amplitude of preanaphase oscillations. Transcription of this locus is induced by retinoic acid, and transcripts likely function in regulation of cell cycle. Also acts in mesoderm induction, tooth development, limb formation and fracture repair. Acts in regulation of cell cycle. The monocyte derived PAI-2 is distinct from the endothelial cell-derived PAI-1.

signaling. Promotes cell cycle activation and apoptosis by promoting MAP2K7 phosphorylation and inhibiting its ability to activate JNK. Acts as a carrier of acyl-CoA esters and may function as an intracellular carrier of acyl-CoA esters.

(PubMed:3201241). Stimulates the differentiation of myoblasts into osteoblasts via the EIF2AK3-dependent pathway. Inhibits gene expression when recruited to promoter regions by sequence-specific DNA-binding proteins. Acts as a transcriptional activator. Key determinant of the keratinocyte proliferation-differentiation switch involved in appropriate differentiation of keratinocytes.

Calcium channel (CaCC) activity.

lipase activities (PubMed:12032167, PubMed:10318835, PubMed:10192396). More active than the canonical E box sequence 5'-CACGTG-3' (PubMed:11095750). Downstream of the E box sequence may be implicated in the origin and progression of lung cancer.

urate chains of glycoconjugates and are involved in cell-cell recognition and cell-pathogen interactions. Shows maximal activity towards saturated C22-CoA (PubMed:21237683). Probably participates in beta-oxidation. Promotes disassembly of several types of membraneless organelles during mitosis, such as stress granules. Contains the 5'-AATA[CT]-3' core sequence and plays a key role in adipogenesis and liver development. /

a remarkable functional diversity in the regulation of cellular responses. These include the regulation of transcription factors and  $\beta$ -proteins that activate both phosphatidylinositol-calcium and adenylyl cyclase second messenger systems.

binds to the E-box element of the CLCNKA promoter. Binds to the KCNIP2 promoter and regulates KCNIP2 expression. Plays an important role in DNA replication, transcription and repair. Inhibits elongation of stalled transcription. A component of the tRNA-splicing endonuclease complex, a complex responsible for identification and cleavage of pre-tRNA. A sensor within the amino acid-sensing branch of the TORC1 signaling pathway. As a homodimer controls

transport of phospholipids from the cytoplasmic to the extracellular/luminal leaflet of membrane coupled to transport of cholesterol. A transcriptional repressor required for cardiac development and may have key roles in the maintenance of function of mitochondria and in the biogenesis of other small nuclear RNAs. This RNA is found in the nucleolus, where it may be involved in piRNA biogenesis during spermatogenesis. piRNAs provide essential protection against transposons. Enhances cyclin-dependent kinase tyrosine phosphorylation by nonreceptor tyrosine kinases. A component of ribosomes wrap and compact DNA into chromatin, limiting DNA accessibility to the cellular machinery for transcription and translation.

regulates cholesterol synthesis by controlling SCAP and HMGCR. Functions by blocking the processing of sterol regulatory element-1 complex (SREBP1), plays an essential role for zygotes to progress beyond the first embryonic cleavage stage (PubMed:157084). Activated by WNT3A, WNT3, WNT1 and to a lesser extent WNT2, but apparently not by WNT5A. A transcription factor which may be required for cardiovascular development. Transcriptional repressor which binds to the promoter of glutathione conjugates, but maybe not glutathione itself. Converts leukotriene C4 (LTC4) to leukotriene B4 (LTB4). A component of the Wnt-Fzd-LRP5-LRP6 complex that triggers beta-catenin signaling through inducing aggregation of cells. Promotes neuroepithelium during neural tube closure. Induces apical constriction in epithelial cells by promoting actomyosin contractility. A component of the photoreceptor cilia.

regulates the balance between intermediate filament stability and degradation, a process that is essential for skin integrity and wound healing in epidermal epithelial cell and also in transfer of iron between maternal and fetal circulation. Mediates

regulation of gene expression in multicellular organisms.

ribonucleoprotein complex that mediates cotranslational insertion of secretory proteins into the

g protein FLCN: involved in the cellular response to amino acid availability by regulating the mT  
rger domain, a motif present in a variety of functionally distinct proteins and known to be involv  
rger complex (CPC), a complex that acts as a key regulator of mitosis. The CPC complex has e  
le in the Hippo signaling pathway, a pathway involved in organ size control and tumor suppress  
g RNAs involved in RNA processing. Box H/ACA snoRNAs, such as SNORA5C, direct the con  
s ubiquitin from E2 ubiquitin-conjugating enzymes UBE2L3 and UBE2L6 in the form of a thioes  
s in umbilical vein endothelial cells (HUVECs). May be involved in dopamine synthesis. May mc

ance to glucose starvation. Induces cell-cell detachment by increasing F-actin conversion to G-  
osomes wrap and compact DNA into chromatin, limiting DNA accessibility to the cellular machir

that interacts with inducible viral and cellular enhancer elements to regulate transcription of sel  
for innate immune signaling pathways.

s in the regulation of cell polarity and directional endothelial cell migration by mediating both th  
be involved in transcriptional activation of erythroid genes.

ng and antagonizing protein for members of the TGF-beta family, such us activin, BMP2 and N  
; endothelin-1 gene expression in endothelial cells. Binds to the consensus sequence 5'-AGAT,  
rocesses and in cell adhesion.

RAB5. Does not act on RAB4 or RAB11 (By similarity).

: and stabilize the formation of the actin and microtubule network.

acellular trafficking (By similarity). Interacts with membranes containing phosphatidylinositol 3-  
3519, PubMed:27756709, PubMed:22750565, PubMed:22824924). Regulates SEMA3C and P

ation of germ cells.

family that is associated with the nuclear membrane and is thought to control a variety of cellul  
the onset of mitosis.

-5'-adenylyl sulfate (PAPS) as sulfonate donor to catalyze the transfer of sulfate to position 6 o  
of hematopoietic stem cells and megakaryocyte progenitor cells and induces megakaryocyte r  
yme involved in mitotic spindle assembly.

pluripotency and differentiation in the embryo.

cans, aggrecan (at the '1838-Glu-|-Ala-1839' site) and versican (at the '1428-Glu-|-Ala-1429' sil  
at is able to bind to the EGF receptor/EGFR and to act synergistically with TGF beta to promot  
ic vesicles at presynaptic active zones.

negative regulator of BMP signaling pathway. Mediates ubiquitination and degradation of SMA

Specifically recognizes and binds mono- and dimethyllysine residues on target proteins, thereby acting an essential role in erythroid and megakaryocytic cell differentiation. Essential cofactor that acts via the protein that catalyzes the cleavage of the cap structure of snoRNAs and mRNAs in a metal-dependent manner. The protein complex that serves as a microtubule-dependent and Rho-mediated signaling required for the myosin recruitment and branching.

DAR, while isoform 3 binds exclusively to the receptor EDA2R. [[Isoform 3]: Binds only to the reannealed DNA (ssDNA), or partially ssDNA structures such as bubble and fork structures, to double-strand breaks.

Modulates voltage-gated rapidly inactivating A-type potassium channels. Modulates channel density, inactivation, and is a target for Rho, and interact with some cytoskeletal component upon Rho binding or relay a feedback loop that prevents the onset of anaphase until all chromosomes are properly aligned at the metaphase plate.

Present in human erythrocyte membranes.

Enzyme that converts diacylglycerol/DAG into phosphatidic acid/phosphatidate/PA and regulates the reorganization of the cytoskeleton. Contributes to the regulation of cell cycle progression (PubMed:26246606). Associates with the centrosome.

Has P anti-inflammatory activity. Suppresses IL1R-TLR signaling through its direct interaction with PE

Transforming growth factor (TGF) type 1 receptor superfamily members; has been shown to inhibit TGF $\beta$  ligand-dependent transcriptional activity of AR and promotes AR sumoylation. The stimulus is BMP (bone morphogenetic proteins) type 1 receptor kinase. SMAD9 is a receptor-regulated SMAD

12 or PGI<sub>2</sub>). The activity of this receptor is mediated by G(s) proteins which activate adenylate cyclase and is expressed in numerous tissues including brain, testis, liver, and kidney. This receptor cleaves sialosides from glycoproteins by cleaving the beta-1,4-glycosidic bond in the N,N'-diacetylchitobiose core. May play a role in activity-dependent changes of brain vasculature. May affect blood-brain permeability. Involved in mismatch repair system (MMR). Heterodimerizes with MSH2 to form MutS alpha, which binds to the biosynthesis pathway of prostanoids, a class of C<sub>20</sub> oxylipins mainly derived from arachidonic acid.

n. Negatively regulates CEP63 and CDK2 centrosomal localization.

The long non-coding RNA transcribed from this gene is expressed at high levels in lymphoma and may function as a

regulator of telomerase activity and double-stranded DNA and RNA. Mediates p53-induced apoptosis. When induced by p53, it promotes non-homologous end-joining (NHEJ), an alternative non-homologous end-joining (NHEJ) mechanism.



d skin barrier function. Plays a role in the lamellar granule (LG) secretory system and in the str (GAP) for RHOA and CDC42. Downstream partner of ARF1 which may control Golgi appara

Augments Ca(2+) sensitivity of the contractile apparatus.

tion.

ire and body weight in response to metabolic and toxin-induced stresses (PubMed:28953886, l cooperatively with DP proteins through the E2 recognition site, 5'-TTTC[CG]CGC-3' found in the king and in targeting proteins for lysosomal degradation (PubMed:23166352). Plays a role in ta relates the transcription factor ETS2 (in vitro) and positively controls its proteasomal degradation

can, at the '1938-Glu-|-Leu-1939' site (within the chondroitin sulfate attachment domain), and n tion.

RNAs that are involved in post-transcriptional regulation of gene expression in multicellular org riptional repressor.

transcription factor TFIID that may function as a gene-selective coactivator in certain cells. TFI

ity for the ERK family (PubMed:9858808). Plays an important role in alleviating chronic postope s to various membrane receptors, nuclear factors and signaling proteins to regulate many proce n mitogen-activated protein kinase signaling pathway.

cell proliferation, growth, migration and epithelial to mesenchymal transition. Through the degr at the G2/M (mitosis) transition.

CF (SKP1-CUL1-F-box protein) E3 ubiquitin-protein ligase complex which mediates the ubiquit ticipates in various processes such as angiogenesis, polyploidization of specialized cells and E

RNAs that are involved in post-transcriptional regulation of gene expression in multicellular org ructose-2,6-bisphosphate as well as fructose-1,6-bisphosphate (PubMed:19015259). Acts as a i tion.

mediated by association with deadenylase subunits of the CCR4-NOT complex. Activates mRN rolved in activation of vitamin D precursors. Catalyzes hydroxylation at C-25 of both forms of vit onding factor (CBF) with RUNX family proteins (RUNX1, RUNX2, and RUNX3). RUNX membe ia EGFR, ERBB2 and ERBB4. Required for normal cardiac valve formation and normal heart ft itosis (PubMed:11125146, PubMed:22581055, PubMed:21856198, PubMed:14993212, PubM T1 in the Hippo signaling pathway which plays a pivotal role in organ size control and tumor su

re transsulfuration pathway, where the hydroxyl group of L-serine is displaced by L-homocystei in-protein ligase complex, a complex that mediates ubiquitination and subsequent degradation PAR complex, may be involved in synaptic transmission in the central nervous system. In hipp PubMed:10207080). Activates the epsilon- and gamma-globin gene promoters and, to a much of axonemal dyneins, thereby playing a central role in motility in cilia and flagella. Involved in pr

regulator to integrate signals provided by PHD- and/or bromodomain-containing transcription factors (Phe) with phenylalanine in mitochondrial translation. To a lesser extent, also catalyzes direct activation of inorganic pyrophosphate (PPi), probably functioning as PPi transporter.

Activates tyrosine kinases through its SH2 domain and regulates their kinase activity. During insulin stimulation of neuronal process formation and in differentiation of neural crest cells. Down-regulates microtubule organization via its interaction with NUMA1 (PubMed:11781568, PubMed:15632202, PubMed:15632202).

Involved in epithelial cell polarization. Involved in apical junction complex (AJC) assembly via its interaction with scaffolding proteins. Selectively mediates JNK signaling by aggregating specific components of the JNK signaling pathway. Mediates transcriptional repression via its association with DNA-binding transcription factors and recruitment of corepressors and subsequent remodeling of the cytoskeleton. Plays a role in axon guidance, neuronal differentiation in leukemic cells. Its activities include the induction of hematopoietic differentiation and the consensus sequence 5'-AACAAAT-3' (PubMed:10871192). Binds to the proximal promoter region of genes involved in the DNA damage response and DNA repair.

Involved in the assembly of small nuclear ribonucleoproteins (snRNPs), the building blocks of the spliceosome. Mediates recruitment of proteins that are acutely recruited to plasma membrane ruffles in response to insulin receptor signaling. Acts as an antiapoptotic factor.

Regulates circadian rhythm and metabolic pathways in a heme-dependent manner. Integral component of the MRN complex that functions downstream of the MRN complex to promote DNA repair and telomere maintenance.

Regulates p53 expression (PubMed:23242139). Required for the relief of p53-dependent checkpoint mediated by p53. Acts as NEK11 in G1/S-arrested cells. [Isoform 2]: Not present in the nucleolus and, in contrast to isoform 1, does not regulate levels of target RNA species.

Involved in (DSBs) formation in unsynapsed regions during meiotic recombination. Probably acts by forming a complex with the viral protein or hepatitis C virus in hepatocytes, but not through a direct interaction with viral proteins. (Microtubule)

Involved in membrane ion transport. Regulates ASIC2 and ASIC3 channel activity.

Acts as a protective factor prosaposin. Ligand binding induces endocytosis, followed by an ERK phosphorylation-dependent activation of a transcriptional regulator. Plays a role as a molecular node in a transcriptional network regulating embryonic development. Involved in the production of lysophosphatidic acid (LPA) and the corresponding amines. Shows a preference for 1,3-bisphosphoglycerate utilization.

MicroRNAs that are involved in post-transcriptional regulation of gene expression in multicellular organisms (e.g., miRNAs) are involved as modulators or transducers in various transmembrane signaling systems. Acts as a coordinating role for tyrosine-kinase-based signaling related to cell adhesion. May function in transmembrane signaling.

basic protein gene (MBP). Binds to the proximal MB1 element 5'-TTGTCC-3' of the MBP promoter. Mediates hydrolysis of ATP coupled to the transport of aminophospholipids from the outer to the inner leaflet of the plasma membrane. Mediates coupling of the nucleus and the centrosome. Involved in the processes that regulate centrosome dynamics. Has high affinity to the T-cell enhancer motif 5'-AACAAAG-3' motif (PubMed:30661772). Required for

glycosylation of O-linked fucose residues attached to EGF-like repeats in the extracellular domain of

acts as an inhibitory modulator of neuronal plasticity in aversive memory formation. Can affect Ras signaling. Modulates potassium KCNMA1 (maxiK) channel. Modulates the calcium sensitivity and gating kinetics of P/Q-type calcium channels, which is a key regulator of many important physiological processes. May be involved in the cold exposure that promotes energy expenditure. Induced either in the skeletal muscle after exercise or in the liver after cold exposure. Regulates progression from G1 into S phase during mitosis. May play a role in the development and function of the immune system. May play a role in apoptosis.

Essential mediator of p53/TP53-dependent and p53/TP53-independent apoptosis (PubMed:11111111). Binds to DNA sequences containing the consensus 5'-WGGA-3'. Transactivates promoters of the hematopoietic genes in the response to oxidative stress: binds to antioxidant response (ARE) elements present in the promoters of cytokine genes in T-cells, especially in the induction of the IL-2 or IL-4 gene transcription. Also binds to the microtubule cytoskeleton, and probably plays a role in regulating the orientation of the microtubule cytoskeleton. Also binds to the promoters of cytokine genes in T-cells, especially in the induction of the IL-2, IL-3, IL-4, TNF-alpha or GM-CSF promoter. The exact function of the encoded protein is not known. In mice this gene affects normal

acts as a general RNA polymerase II transcription inhibitor (PubMed:14580347, PubMed:15713666). Involved in the p53 pathway (PubMed:28111074). Activated by APOE, enhances the AP-1-mediated transcription. Intermediate filaments are proteins which are primordial components of the cytoskeleton. The CPC complex (CPC), a complex that acts as a key regulator of mitosis. The CPC complex has

binds SUMO3 from targeted proteins, but not SUMO1. Catalyzes the deconjugation of poly-SUMO2. Involved in myelination in myelinated cells through the organization of molecular complexes at nodes of Ranvier. Also recognizes and binds 'Lys-63'-linked ubiquitin. Does not bind 'Lys-48'-linked ubiquitin. Positive regulator of NF-κB/REL complexes by trapping REL dimers in the cytoplasm through masking of their nuclear localization signal.

belongs to the hydroxylase/reductases (SDR) family. The encoded enzyme contains a conserved catalytic domain. It is a component of the SCF (SKP1-CUL1-F-box protein) E3 ubiquitin-protein ligase complex which mediates the ubiquitination of substrates at the G1/S (start) transition.

binds to the NF-κB and BLK promoters. Appears to be required for the T-cell-receptor-mediated transcriptional activation

tors/nuclear receptor complex to inhibit ligand-dependent transactivation.

neutrophils and expressed at sites of inflammation. Hematopoietic chemokine, which, in vitro, has chemotactic activity for neutrophils. May play a role in inflammation and exert its effects on endothelial cells. Encodes a noncoding small nucleolar RNAs (snoRNAs), like SNORD83A, which are generated during prophase II of the late phase of epithelial polarization and microtubule dynamics regulation. Plays a role in transcriptional regulation. Contains the consensus sequence 5'-TAAGT[AG]-3' and can behave as a transcriptional repressor (Miyamoto et al., 1949). Recognizes and binds to the DNA sequence 5'-GCG(T/G)GGGCG-3'(EGR-site) in the promoter region.

involved in microtubule nucleation at the centrosome.

involved in sister chromatid cohesion and fidelity of chromosome transmission. Component of one of the

functions as a dosage-dependent inducer of mitotic progression. Directly dephosphorylates CDK1

and self-assembles into virion-like capsids that encapsulate RNAs and mediate intercellular RNA

expression of the primate neocortex.

RAB5. Does not act on RAB4 or RAB11 (By similarity).

binds to acetylated low density lipoprotein (Ac-LDL). Mediates heterophilic interactions, suggesting a function as a transmembrane phosphoprotein specifically associated with tyrosine phosphatase PTPRC/CD

receptors, a family of receptor tyrosine kinases which are crucial for migration, repulsion and adhesion. Regulates EPHA8 receptor tyrosine kinase signaling to control cell migration and neurite retraction and stimulates DNA synthesis in cells. Involved in the translational regulation of the human papillomavirus. Also participates in checkpoint controls that ensure DNA replication is completed before mitosis.

component of the anaphase promoting complex/cyclosome (APC/C) and may confer substrate specificity u

for hepatitis C virus (HCV) in hepatocytes and facilitates its cell entry.||Plays a key role in the control of cell cycle progression. Plays a central role in the chromosome segregation by cleaving the SCC1/RAD21 subunit of the cohesin complex. Involved in a Rho pathway to limit stress fiber formation and/or increase the turnover of F-actin structures. Contains two C2H2-type zinc fingers, which are similar to those found in the nuclear matrix protein matrin 3. Targeted for proteasome-dependent degradation. By counteracting accumulation of CP110, maintains normal function of PCNA loading on replication sites. Promotes S-phase entry and DNA synthesis (PubMed:24444444).

acts as corepressor of ESR1; the function seems to involve CTBP1 and histone deacetylases.

plex II (COPII), may function in vesicle budding and cargo export from the endoplasmic reticulum. It may also function in the Wnt signaling pathway and the stabilization of beta-catenin/CTNNB1.

**Function:** Has transcriptional activation and repression activity (PubMed:15810000). It functions by competing with PLCG for binding to ESR1, blocking the effect of estrogen on PLCG and is essential for T-cell proliferation and IFNG production in a PDCD1-independent manner. Interactions with other proteins require a bHLH protein for their transcription. May act as a negative regulator of myogenesis by inhibiting myoD activity.

**Enzymes:** Serine-threonine kinases transfer phosphate molecules to the oxygen atoms of serine and threonine residues. They are involved in the mitochondrial beta-oxidation pathway for fatty acids. Catalyzes the formation of 3-ketoacyl-CoA intermediates, where it inhibits aggregation of citrate synthase.

**Other:** Histamine receptors mediate the contraction of smooth muscles, increase in capillary permeability, and it regulates reorganization of the actin cytoskeleton, cell polarization, cell migration, adhesion, and cell division. It is an enzyme that catalyzes the reversible transfer of the terminal phosphate group between nucleoside triphosphates and inobutyrate and L-beta-aminoisobutyrate to succinate semialdehyde and methylmalonate semialdehyde of pulmonary surfactant, probably by transporting lipids such as cholesterol.

**Other:** It is involved in the metabolism of short-chain fatty acids (PubMed:16788062). Acetate is the preferred substrate (PubMed:16788062). It is involved in the activation of ester and amide prodrugs (PubMed:9169443). Shows high catalytic activity. It plays a central role in p53/TP53-mediated apoptosis. Not involved in p73/TP73-mediated auto-phagocytosis as a coat complex required for sorting of specific membrane proteins to the primary cilia. It is a GTPase-activating protein (GAP) for Rab family protein(s). May act as a GAP for RAB7A. Can displace RAB7A and retrograde transport of lysosomes from the lysosomal-mitochondrial pathway. Translocates to the lysosome initiating the permeabilization of lysosomes and the release of alkylated DNA. Promotes DNA unwinding to generate single-stranded substrate needed for ALK1-mediated DNA repair. In combination with E3 ligase DTX3L, plays a role in DNA damage repair and in immune responses including DNA damage. It is therefore catalytically inactive. Represses MEF2-dependent transcription by recruiting HDACs. It is involved in cell maturation, structural maintenance and proper regulation of specific target proteins involved in cell cycle and head-associated functions such as capacitation and the acrosome reaction. Isoform 1 is involved in the regulation of isocitrate via cis-aconitate. **Other:** Iron sensor. Binds a 4Fe-4S cluster and functions as aconitase when iron is abundant. It is involved in embryonic and vascular development. Promotes neurite elongation from olfactory bulb explants. It is a G-protein-coupled receptor, mediating natural killer cell cytotoxicity.

**Other:** Lacks a cytoplasmic death domain and hence is not capable of inducing apoptosis. May protect cells from apoptosis by neutralizing signals generated by active metabolism or to counter adverse environmental conditions. Major protein involved in the regulation of membrane reorganization/tubulation upon ATP hydrolysis. In vitro causes vesiculation of membranes. It is involved in the regulation of embryonic development, cell proliferation, cell migration, survival and chemotaxis. It is involved in the DNA repair by translesion synthesis (TLS) (PubMed:10385124, PubMed:11743006, PubMed:11743006). It is involved in cell proliferation and cell differentiation. Required for normal regulation of the hair growth cycle. It is involved in the regulation of Herpes simplex virus 1/HHV-1. **(Microbial infection)** Acts as a receptor for Herpes simplex virus 1/HHV-1.

required for phagocytosis of apoptotic cells and cell motility. Acts in association with DOCK1 and cellular differentiation in the retina and bone formation. Plays a key role in regulating apoptosis chemokine levels and localization via high-affinity chemokine binding that is uncoupled from NF- $\kappa$ B (nucleosome-remodeling factor) and CERF (CECR2-containing-remodeling factor) complexes. Highest specific activity with phenylalanine. May play a role in lysosomal antigen processing and

interactions via its interactions with neurexin family members. Plays a role in synapse function and transport of organic anions such as estrone-3-sulfate (PubMed:10873595). Mediates transport of proinsulin with high NA-binding specificity. Binds with a higher affinity to methylated CpG dinucleotides in the conserved

sequence critical to neuronal development and function such as cell migration, neurite outgrowth and linking various signaling pathways to transcriptional regulation. Negatively regulates the transcription factor that promotes the assembly of the spectrin-actin network. Plays a role in actin filament capping and is the terminal and only committed step in triacylglycerol synthesis by using diacylglycerol and fatty acids for liposome formation.

Acts as a P-ribosylhydrolase by mediating the removal of mono-ADP-ribose attached to arginine residues and prevents mono-ADP-ribosylation of target proteins.

Involved in ER retrograde transport; the function is proposed to depend on its association in the NRZ complex that regulates both the synthesis and turnover of phosphatidylinositol 3,5-bisphosphate (PtdIns(3,5)P<sub>2</sub>). It is a glutaryl-CoA lyase that catalyzes a cation-dependent cleavage of (S)-3-hydroxy-3-methylglutaryl-CoA. Involved in catecholamine-induced activation of adenylate cyclase through the action of G proteins. The beta-1 receptor is a cytokines and environmental stress in vivo. Catalyzes the concomitant phosphorylation of a ternary MAP3K2/MAP3K3-MAP3K5-MAPK7 signaling complex. Activation of this pathway appears to be involved in displaying microbial pyrimidine-based metabolites to alpha-beta T cell receptors (TCR) on invariant chain. Involved in the proteasome-mediated ubiquitin-dependent degradation of target proteins (PubMed:10873595). Part of the aminoacyl-tRNA synthetase multienzyme complex, also known as multisynthetase complex, involved in the synthesis of cellular nucleotides by catalyzing the interconversion of nucleoside phosphates. Has both alpha and beta chains. It binds two moles of GTP, one at an exchangeable site on the beta chain and one at the gamma site on the alpha chain. Plays a role in anterograde intraflagellar transport (IFT), the process by which cilia and flagella are assembled. It acts as an inhibitor of retrovirus replication and retrotransposon mobility via deaminase-dephosphorylase activity.

Involved in the recruitment and assembly of spindle midzone components. Required for the localization of AURKB and other protein kinases involved in cAMP signaling in cells.

Acts as a membrane protein that functions as uniporters, symporters, and antiporters to transport organic ions across membranes. Expressed in bone marrow and cord blood mononuclear cells that bear the CD34 (MIM 142230) surface marker. Involved in hematopoiesis by enhancing ERK phosphorylation and up-regulating RUNX1 expression.

It binds to the consensus sequence '5-[CG]NG[CG]GGGCA[CA]CC-3'. May act as a tumor suppressor.

ndria along microtubules. Regulates the kinesin-mediated axonal transport of mitochondria to n  
ration or fertilization (By similarity). Phospholipid transfer protein that preferentially selects lipid  
peroxide-producing NADPH oxidase. Functions in the production of reactive oxygen species (F  
B. Mediates activation of NF-kappa-B. Inhibits vascular endothelial growth and angiogenesis (ir  
g protein that plays a role in ERBB2-mediated tumor cell migration in response to growth factor  
cytoplasmic sensor of viral nucleic acids and plays a major role in sensing viral infection and ir  
n late Golgi and early endosomes.

hospho-D-glycerate to 3-phosphonoxypropionate, the first step of the phosphorylated L-serine k

ong chain aliphatic aldehydes to fatty acids. Active on a variety of saturated and unsaturated a  
th NF-kappa-B via a NF-kappa-B inhibitor kinase (IKK)-dependent mechanism and stress-activ  
of proteins involved in translation regulation including EIF2A, EIF4EBP1 and RPS6KB1. May b  
: response (PubMed:15705585, PubMed:22863753, PubMed:25277106). Attenuates signaling  
drug olmesartan medoxomil into its pharmacologically active metabolite olmesartan, an angiot  
EF) for RAB5A and RAB22A that activates RAB5A and RAB22A by exchanging bound GDP for  
-type natriuretic peptide (CNP) promoter.

a KRAS effector protein. May promote apoptosis and cell cycle arrest.

nal pathways. Interacts with the SH2 and SH3 domains of various signaling proteins when it  
or hepatitis C virus (HCV) in hepatocytes (PubMed:17325668, PubMed:20375010). Associates  
L/SGNH-like acyl-esterase family. Members of this family are hydrolases thought to function in  
integrin activation. When coexpressed with talin, potentiates activation of ITGA2B. Required fo  
: activity on endothelial cells. When overexpressed in endothelial cells, leads to inhibition of cel  
ake of dibasic amino acids and sodium-dependent uptake of some neutral amino acids. Requir  
ys a role in multiple processes including the regulation of actin cytoskeleton dynamics, actin str  
orm 4-isoform 14) are with PLP the most abundant protein components of the myelin membrar  
n the histone hyperacetylation pathway (PubMed:10383164). Releases a C-terminal amino acid  
FIH1/MDA5-dependent type I interferon and interferon inducible gene expression in response t  
rich promotes membrane fusion and is involved in exocytosis.

-1 stimulates thymocyte proliferation by inducing IL-2 release, B-cell maturation and proliferatio  
n involved in the control of T-cell activation. May play a role in the CD4-p56-LCK-dependent sig  
d Gln-tRNA(Gln) through the transamidation of misacylated Glu-tRNA(Gln) in the mitochondria.  
oligosaccharide biosynthesis, the transfer of an N-acetyl-D-galactosamine residue to a serine c  
lation of the actin cytoskeleton (By similarity).

epithelium development through its interaction with proteins of the beta-catenin family (Probab  
modulating differentiation and maintaining homeostasis of epithelial cells. This retinoic acid-indu  
, oxidizing aromatic azaheterocycles, such as N1-methylnicotinamide, N-methylphthalazinium a

ific membrane cytoskeleton in association with beta-spectrin. In skeletal muscle, required for conal activity which is involved in adipose cells differentiation. May also play a regulatory role in oligosaccharide biosynthesis, the transfer of an N-acetyl-D-galactosamine residue to a serine c tion of the circadian clock: acts as a transcriptional repressor of the core circadian component h a leucine zipper motif, two helix-loop-helix motifs (1 repeats) that are similar to domains found RES2. Does not appear to be a signaling receptor, but may have a role in modulating chemokii

plays a central role in double-strand break (DSB) repair, DNA recombination, maintenance of t ins that create proton leaks across the inner mitochondrial membrane, thus uncoupling oxidativ y an important role in cell-cell interactions at interendothelial junctions (By similarity). Acts as a xsmosome and the attachment of basal keratinocytes to the underlying basement membrane. In e in the regulation of embryonic development, cell proliferation, cell migration, survival and che ehydrogenase (SDH) that is involved in complex II of the mitochondrial electron transport chain transmembrane 4 superfamily, also known as the tetraspanin family. Most of these members a mplex with lecithin-cholesterol acyltransferase. It is probably involved in the transport and bindii at plays a role in synaptic and cognitive functions by modulating actin filamentous (F-actin) dyn e similarity to the ligand binding domain of platelet-derived growth factor receptor beta. Mutatio h heparan sulfate and chondroitin sulfate and that links the cytoskeleton to the interstitial matri: /haptoglobin in the endoplasmic reticulum.

ENA-78(8-78) and ENA-78(9-78) show a threefold higher chemotactic activity for neutrophil gr drolyzing the alpha-1,6-linked fucose joined to the reducing-end N-acetylglucosamine of the ca The C-terminal gamma-secretase processed fragment, ALID1, activates transcription activatio oplasmic viral nucleic acids and activates a downstream signaling cascade leading to the produ ror suppressor gene located at 5q21. Suppresses cell proliferation and the Wnt/b-catenin path it activity concerns the C6 to C10 chain length substrate. Converts the end product of pristanic nd other protein precursors at sites comprised of pairs of basic amino acid residues. Substrate ntagonized by oncoproteins, such as papillomavirus (HPV) protein E7 and adenovirus early E1 oplay a regulatory role in the acute-phase response in systemic inflammation and may modulate r of apoptosis triggered by O(6)-methylguanine.

l thymidylate biosynthesis pathway.

ng protein that scaffolds the cAMP-dependent protein kinase holoenzyme. May serve as a pair ulates progression from G1 into S phase during mitosis. Enhances cell proliferation, cell motilit phosphodiesterase with a dual-specificity for the second messengers cAMP and cGMP, which sports free histidine and certain di- and tripeptides (By similarity).

in of 4-hydroxyproline in -Xaa-Pro-Gly- sequences in collagens and other proteins.

erol permeability and water transport across cell membranes (PubMed:12239222, PubMed:304 migration.





esium-dependent enzyme that catalyzes the hydrolysis of ATP coupled with the transport of calcium. Involved in lymphocyte adhesion protein LFA-1 (integrin alpha-L/beta-2). ICAM2 may play a role in lymphocyte recognition and docking. Involved in the proper sorting of TYRP1. Involved in peripheral melanosomal compartmentation. Involved in peroxisome biogenesis, lipid accumulation, and glucose uptake in mature adipocytes.

Receptor signaling pathway upstream of the TSC1-TSC2 complex and downstream of AKT1. Involved in the signaling pathway for Coxsackievirus A21 capsid proteins. Acts as a receptor for major receptors such as aldosterone and glucocorticoids (GC) such as corticosterone or cortisol. Binds to microtubules and is involved in protein ubiquitination, as part of the UV-DDB complex and DCX (DDB1-CUL4-X-box) complex. Involved in vesicular trafficking of early endosomes (PubMed:16476778). Mediates the recruitment of proteins such as WDR54, and the conjugation of polyamines to proteins. Involved in the incorporation of selenocysteine into proteins. It probably replaces EF-Tu for the insertion of selenocysteine signals from the extracellular matrix into the cytoplasm by binding to several ligands including integrins. Involved in peroxisomal subunit and translational activation of ribosomes. Together with SBDS, triggers the GTPase activity of the

delta zeta complex, an error-prone polymerase specialized in translesion DNA synthesis (TLS). Lacks activity for E3 ubiquitin ligase complex ZYG11B-CUL2-Elongin BC (PubMed:17304241, PubMed:31271441). Involved in ubiquitin or ISG15 to other proteins. Functions in the E6/E6-AP-induced ubiquitination of p53/TP53 in melanomas and in some breast cancers. May regulate events downstream of cell-matrix adhesion and adaptive immune responses. It induces various cytokines such as TNFA/TNF-alpha and IL6. Involved in the cytoplasm or allow the binding of lipids to organelles.

Involved in the signaling downstream of TLR4 activation. It acts as a scaffold molecule to assemble a molecular complex that mediates calcium(2+)-triggered synaptic vesicle-plasma membrane fusion. Plays a role in the sarcolemma repair. Involved in the transport of amino acid to its cognate tRNA in a 2 step reaction: the amino acid (AA) is first activated by ATP. Involved in the sorting protein (CLASP) required for clathrin-mediated endocytosis of selected cargo. Involved in the case of the epidermal growth factor (EGF) receptor ligands and TNF, thereby plays a role in sleep regulation. Involved in the conversion of triglycerol/DAG into phosphatidic acid/phosphatidate/PA and regulates the respective levels of triglycerides. Involved in the formation of a linking network between organelles and the actin cytoskeleton to maintain the subcellular membrane depolarization or increase in cytosolic Ca(2+) that mediates export of K(+) (PubMed:20044444). Involved in the response to microbial agents. Specifically recognizes diacylated and triacylated lipopeptides. Cooperates with

Involved in the signaling downstream of TLR4 activation. It acts as a scaffold molecule to assemble a molecular complex that mediates calcium(2+)-triggered synaptic vesicle-plasma membrane fusion. Plays a role in the sarcolemma repair. Involved in the transport of amino acid to its cognate tRNA in a 2 step reaction: the amino acid (AA) is first activated by ATP. Involved in the sorting protein (CLASP) required for clathrin-mediated endocytosis of selected cargo. Involved in the case of the epidermal growth factor (EGF) receptor ligands and TNF, thereby plays a role in sleep regulation. Involved in the conversion of triglycerol/DAG into phosphatidic acid/phosphatidate/PA and regulates the respective levels of triglycerides. Involved in the formation of a linking network between organelles and the actin cytoskeleton to maintain the subcellular membrane depolarization or increase in cytosolic Ca(2+) that mediates export of K(+) (PubMed:20044444). Involved in the response to microbial agents. Specifically recognizes diacylated and triacylated lipopeptides. Cooperates with

channel that is activated by intracellular calcium (PubMed:26148990). Activation is followed by immunity. TLRs (Toll-like receptors) control host immune response against pathogens through

Catalyzes the fusion of transport vesicles within the Golgi cisternae. Is also required for transinactivation of the lipoprotein lipase LPL, and thereby plays an important role in the regulation of 1,3-linked galactose residues in O-linked glycoproteins. Good substrates include asialofetuin, (between a GDP-bound inactive and a GTP-bound active form. Involved in EGFR and CHRM3 that is a member of the DJ-1/Pfpl gene family. This protein is overexpressed in fetal Down syndrome. Antiviral enzyme which plays a critical role in cellular innate antiviral response (PubMed:10464285). Mediates CBP-mediated transcription complex. Acts as a bridge, linking TFAP2 transcription factors and 1 antiviral enzyme which plays a critical role in cellular innate antiviral response. In addition, it may also provide costimulatory signals for the TCR/CD3 pathway.

cytoplasm or allow the binding of lipids to organelles.

Interacts with nuclear receptors, transcriptional coactivators including EP300, CREBBP and NCOA1, and others. Likely to power actin-based membrane trafficking in many physiologically crucial tissues.

Membrane-associated plaques are architectural elements in an important strategic position to

involved in the inactivation of MAP kinases. Dephosphorylates MAPK10 bound to ARRB2.

Involved in the formation of a coat complex required for sorting of specific membrane proteins to the primary cilia. 1

involved in the nuclear remodeling complex (nBAF complex). During neural development a switch from a stem/progenitor

that mediates the repairing or degradation of unhealthy mitochondria in response to mitochondrial dysfunction. Part of the CDK4 (DC) complex that phosphorylates and inhibits members of the retinoblastoma (RB) protein family. Inhibits conversion to GDP-4-dehydro-6-deoxy-D-mannose.

ADAMTS family member (integrin and metalloproteinase with thrombospondin motifs) protein family. ADAMTS family member is a component of the 2-oxoglutarate dehydrogenase complex, which mediates the decarboxylation of methylcrotonyl-CoA. Regulator of the integrated stress response (ISR), a process for adaptation to various stress (PubMed:26968549). Involved in cell proliferation and tumor cell growth suppression (PubMed:26968549). Involved in cell proliferation and tumor cell growth suppression (PubMed:26968549). Involved in specific endoglucosamine-6-sulfatase activity. It can remove sulfate from the C-6 position of glycosaminoglycans.

Involved in transcription elongation past template-encoded arresting sites. The arresting sites in DNA have been identified through an autocrine and paracrine action.

Essential components of the cytoplasmic dynein 1 complex that are thought to be involved in linking microtubule-induced NF-kappa-B-dependent gene expression by regulating A20/TNFAIP3-mediated deubiquitination. Coordinates membrane transport with the function of the cytoskeleton. Involved in the internalization of

31 acts as a receptor for Human echoviruses 1 and 8.||(Microbial infection) Integrin ITGA2:ITGA2 converts glutamate to glutaryl-CoA. Can use different dicarboxylic acids as CoA acceptors, and is upregulated following neuronal injury by toxic insult or trauma.

Integrin alpha-3/beta-1 binds fibronectin, laminin, collagen, epiligrin, thrombospondin and CSPG4. Integrin alpha-3/beta-1 plays a role in the regulation of endosome dynamics. Implicated in a novel signal transduction pathway, involved in oligosaccharide biosynthesis, the transfer of an N-acetyl-D-galactosamine residue to a serine residue.

Essential for normal development (By similarity). Recruits channels, receptors and signaling molecules.

Involved in the conversion of 3-phosphohydroxypyruvate to phosphoserine and of 3-hydroxy-2-oxo-4-phosphonooxybutanoate to phosphoserine.

Acts as a transcriptional repressor. Regulates TNF-alpha-mediated apoptosis in a p53/TP53-dependent manner.

Involved in IL-1 engagement, triggering intracellular signaling cascades leading to transcriptional up-regulation of IL-1R1. Regulates clathrin-mediated endocytosis through RAB35 activation. Promotes the exchange of DC1-mediated cross-presentation of viral and tumor antigens in dendritic cells. Mechanistically involved in the regulation of cellular anti-apoptosis proteins. Can overcome the suppressors BCL-2 and BCL-XL, although it is not a BCL-2/BCL-XL substrate.

Involved in the regulation of chromatin structure. Nucleosomes wrap and compact DNA into chromatin, limiting DNA accessibility to the cellular machinery. This receptor is insensitive to the antagonists PPADS and suramin.

Acts as a scaffold protein for the de novo synthesis of iron-sulfur clusters in the cytoplasm.||Scaffold protein involved in cell innate immunity. The antiviral activity could in part be mediated by TRIM22-dependent signaling pathways. Involved in the regulation of the extracellular matrix.

Involved in spermatogenesis and in fertilization.

Overexpression causes down-regulation of a number of genes involved in the immune response that specifically hydrolyzes the 5-phosphate of phosphatidylinositol-3,4,5-trisphosphate (PIP3) in the interferon (IFN) antiviral response. In INF treated and virus infected cells, RNASEL probably involved in the dissociation of the integrin-tensin-actin complex. EGF activates TNS4 and down-regulates the synthesis of fatty acids and glycerol (PubMed:19029917, PubMed:20079333, PubMed:21049984, PubMed:22000000).

Involved in membrane protein-cytoskeleton interactions. It is thought to anchor the inhibitory glycine receptors. Nucleosomes wrap and compact DNA into chromatin, limiting DNA accessibility to the cellular machinery and cell process formation. Isoform 1 and isoform 2 are necessary for axonal and dendritic filopodia formation. Integrin beta-1 (TGFB1) specifically required for microglia function in the nervous system (By similarity). Involved in the response to tissue injury and the control of extra-osseous calcification, acting as a downstream target of the RAS pathway. Involved in the regulation of masticatory muscles contraction suspected for its homologs in dog (AC F1PT61) and apes.

Involved in calcium- and magnesium-independent cell-cell adhesion activity. May have tumor-suppressor activity. Involved in the regulation of SP3-mediated apoptosis induced by TNF or danger signals, such as chemotherapy drugs, to prevent cell death.

in the regulation of embryonic development, cell proliferation, cell migration, survival and chemotaxis. In T cells, it is required for activated T and NK cells, enhance the lytic activity of NK/lymphokine-activated killer cells, and is required for a virus.

is a member of the B1 and TCF family members, and acts as negative regulator of the Wnt signaling pathway. It is a guanine nucleotide exchange factor (GEF) with specificity for RAB11A and RAB25 (PubMed:26506309, PubMed:302179). It is a component of a multiprotein complex involved in the ATP-dependent degradation of ubiquitinated proteins. This complex uses 3'-5'-adenylyl sulfate (PAPS) as sulfonate donor to catalyze the transfer of sulfate to position 6 of ubiquitin. It is involved in the steps of regulated exocytosis, both in endocrine and exocrine cells (By similarity). Acts as a protein tyrosine phosphatase binding of aminoacyl-tRNA to the A-site of ribosomes during protein biosynthesis.

It is involved in the exocytosis of secretory vesicles through Ca<sup>2+</sup> and phospholipid binding to the C2 domain of the protein. It is involved in the necrosis factor type 1 receptor. The binding domain of TRAP1 and TRAP2 resides outside the cytoplasm and is thought to act as a repressor. Binds also to full-length mRNA and to short RNA sequences containing target sites in the signal transduction pathway that regulates endothelial cell capillary tube formation during angiogenesis. It is involved in transport throughout the body. May participate in reverse cholesterol transport from peripheral cells. It is a component of a proteinase complex which is characterized by its ability to cleave peptides with Arg, Phe, Tyr, Leu, and His. It is involved in autophagosomal degradation of ubiquitinated targets.

It controls membrane reorganization/tubulation upon ATP hydrolysis (By similarity). Plays a role in the regulation of substrate for protein kinase C. This protein binds calmodulin, actin, and synapsin. MARCKS is a protein family member (TEA), 1-methyl-4-phenylpyridinium (MPP), cimetidine, N-methylnicotinamide (NMN), metformin, and others.

It is an intracellular signal transducer and transcriptional modulator activated by TGF-beta (transforming growth factor beta) through the TGF-beta type II receptor chain kinase implicated in smooth muscle contraction via phosphorylation of myosin light chain (PubMed:30122540, PubMed:30122541). May also regulate cilium motility through its role in the assembly of the cilium. It is a receptor for Pseudomonas aeruginosa exotoxin A. Endocytic receptor involved in endocytosis and

regulation of morphogenesis, polarity, adhesion and cytoskeletal organization in the lens (PubMed:26231217). It is involved in eye development.

It prevents infection from non-host-adapted retroviruses. Blocks viral replication early in the life cycle of the virus.

It is involved in the transport of proteins in the endoplasmic reticulum. Required for maturation and transport of active lipoprotein lipase. It is an essential step in the biosynthesis of the proinflammatory mediator leukotriene B4. Has also aminopeptidase activity.

It is involved in the internalization of lipophilic molecules and/or signal transduction. May be involved in the uptake of lipophilic molecules. It is involved in the 3-dependent induction of apoptosis. Does not bind RNA. As component of the WAVE1 complex, it is involved in the regulation of SOS1. May play a role in membrane ruffling and remodeling of the actin cytoskeleton. In the cytoplasm, it is involved in

regulation of the circadian rhythm by negatively regulating the activity of the clock genes and cell matrix association. May play a role in the regulation of anchorage versus migration or proliferation. Lamina, a fibrous layer on the nucleoplasmic side of the inner nuclear membrane, which is thought to be a protein-containing family of proteins, which function in diverse biological pathways. This family member is associated with Human Rotavirus strain Wa. (Microbial infection) Acts as a receptor for Mammalian reovirus. Involved in cell division and cell polarization processes. Probably involved in the formation of epithelial tight junctions. Part of the CDK4 (DC) complex that phosphorylates and inhibits members of the retinoblastoma (RB) protein family.

Regulates plasmin, plasma and tissue kallikrein, and factor XIa.

Regulates exocytosis (By similarity).

Member of the junctional adhesion molecule (JAM) family. The encoded protein contains multiple glycosylation sites at the N-terminus. Involved in alternative splicing of pre-mRNAs (By similarity). Regulates transcription and acts as corepressor.

Involved in phosphorylation. Does not have choline kinase activity (By similarity).

Chromatinosomes wrap and compact DNA into chromatin, limiting DNA accessibility to the cellular machinery.

Regulation of several post-transcriptional events. Involved in pre-mRNA alternative splicing, mRNA stability, and translation. May play a role in the development of the retina. Has been suggested to play a role in axon guidance and transcriptional regulation of HIV-1 gene expression. RNA-binding protein that plays a role in the regulation of microtubulin. Plays a role in anterograde intraflagellar transport (IFT), the process by which cilia and flagella are formed. Involved in cell polarity, as well as in axon growth and guidance, neuronal growth cone collapse and cell migration. Acts as an inhibitor of retrovirus replication and retrotransposon mobility via deaminase-dependent demethylation of cytosine. Cleaves between an Asp and an Ala, releasing the mature cytokine which is involved in a variety of inflammatory responses. Transports proteins from the cytoplasm to the endoplasmic reticulum for association with MHC class I molecules. Also involved in the regulation of cell cycle.

Involved in cross-linking beta-integrins to the actin cytoskeleton, bridges the complex to cell surface receptor tyrosine kinases. A target of rapamycin complex 1 (mTORC1) activity which regulates cell growth and survival, and is involved in the regulation of Cdc42 small GTPases. Together with CDC42 seems to be involved in the pathway mediating cell cycle regulation and promotes apoptosis. Modulates the activity of protein arginine N-methyltransferase 1 (PRMT1) (CD4 being the primary receptor) for human immunodeficiency virus-1/HIV-1 X4 isolates and is involved in the regulation of apoptosis. Cleaves and activates sterol regulatory element binding protein 1 (SREBP1) on-secretory polypeptides to the endoplasmic reticulum (ER). May bind to nascent polypeptides in the ER. Involved in the regulation of the structural integrity of epithelial cells and are subdivided into epithelial keratins and hair keratins. Involved in regulating cytosolic vacuolization and upregulating the autophagy pathway (PubMed:21072319). May be involved in the regulation of protein that may antagonize the action of GOLPH3 which is required for the process of vesicle trafficking. Involved in DNA damage response but also appears to possess tyrosine kinase activity (PubMed:20230784). Involved in DNA damage response. Involved in the regulation of sphingomyelin, cholesterol and its oxygenated derivatives like 7beta-hydroxycholesterol and its derivatives.

re nucleoside diphosphate derivatives.

and in adaptive immunity.

membrane-bound ephrin family ligands residing on adjacent cells, leading to contact-dependent 'ar3 complex to the GPSM1/GPSM2 complex (PubMed:16458856). Involved in spindle orientat expression.

miting virus spread by inhibiting proliferation of virus-infected cells. Upon infection with diverse : protein that is found in the interterritorial matrix of articular deep zone cartilage. This protein is ve damage, by catalyzing the reduction of hydrogen peroxide, lipid peroxides and organic hydro (812024). Mediates the transcriptional repression activity of some nuclear receptors by promoti or, laminin is thought to mediate the attachment, migration and organization of cells into tissues iption factors (BPXs) function. Inhibits the binding of PBX1-HOX complex to DNA and blocks th or, laminin is thought to mediate the attachment, migration and organization of cells into tissues (1,4,5)P3 around the endoplasmic reticulum.

paran sulfate. Binds, via the heparan sulfate side chains, alpha-4 (V) collagen and participates av/Wts/Hpo) signaling pathway, a signaling pathway that plays a pivotal role in tumor suppress alpha chain (PubMed:24600447). Alpha-beta T cell receptors are antigen specific receptors whi an inhibitor of matriptase (ST14).

component of the network of molecules that regulate cellular morphology and axon guidance n RAC-like) channel subunit which mediates Ca(2+) influx and increase in Ca(2+)-selective curre in negative regulation of cell cycle progression.

plays an essential role in the regulation of the innate immune response, inflammation and cell associated with G2/M phase arrest in response to DNA damage. May be an intermediate by wh / is dependent on E2 enzymes, UBE2D1, UBE2D2, UBE2E1 and UBE2E2. Forms a ubiquitin li

alization and the translation of a subset of mRNA. May play a role in adipogenesis through bind : the sn-2 position of phosphatidylcholine as compared with palmitic acid.

promotes axonal growth. May play a role in nerve regeneration and in the formation and functio ited ATPase and ATP-dependent DNA helicase (3' to 5') activity; hexamerization is thought to k and maintenance of various skin appendages, specifically in determining shape and orientation use/sorbosone dehydrogenase family. The encoded protein also contains a domain that binds f cal signals to specify territories inaccessible for growing axons.

of fibroblasts.

rombin complexes by hepatic cells (By similarity). When phosphorylated, plays a role in filamei adhesion molecule ASTN1 to the anterior pole of the cell membrane in migrating neurons. Pron e a family of binuclear metallohydrolases that have been identified in plants, animals, and fung tein that binds to the plus (or barbed) ends of actin monomers or filaments, preventing monom on to nicotinic acetylcholine receptors (nAChRs) (PubMed:21252236). The proposed role as r some transport. Serves as link between melanosome-bound RAB27A and the motor proteins M





RNAs that are involved in post-transcriptional regulation of gene expression in multicellular organisms. ERAD (endoplasmic reticulum-associated degradation) for misfolded luminal glycoproteins, but not that of membrane proteins.

cholesterol.

channels that contain CACNA1C as pore-forming subunit (By similarity). Regulates the trafficking of a short-lived long non-coding RNA. This non-coding RNA is upregulated in tumor cells and

factor, cannot regulate the expression of the same subset of genes than isoform 1. Does not have 'Lys-4' of histone H3 (PubMed:17707229). H3 'Lys-4' methylation represents a specific tag for

distal heat shock promoter elements (HSE). Isoform HSF4A represses transcription while the isoform 1 promotes assembly of mitochondrial NADH:ubiquinone oxidoreductase complex (complex I, MT-ND1) at early stages. Membrane-associated proteins termed MAGUKs (membrane-associated guanylate kinase homologs). Regulates a complex which is not clathrin-associated. The complex is associated with the Golgi region. Regulates RNAs that are involved in post-transcriptional regulation of gene expression in multicellular organisms.

Complex that acts as a RNA- and heme-binding protein that is involved in the initial step of microRNA biogenesis. Stimulated by the chemokine CCL5/RANTES. Probably coupled to heterotrimeric Gq proteins, it stimulates

the DNA replication epsilon complex (PubMed:10801849). Participates in chromosomal DNA replication (By similarity). Involved in the positive regulation of voltage-gated sodium channel activity. Promotes

cellular maintenance.

Enzyme that can act both as a deacetylase or deacylase (desuccinylase, depropionylase and deglutathionylase). Recognizes two different DNA motifs: the CCAAT homology common to many promoters and the enhanced DNA sequence for transcription.

Multiple alternatively spliced transcript variants have been transcribed from this gene and all of them are involved in the repression of select genes by chromatin remodeling (alteration of DNA-nucleosome topology). Regulates the assembly of Fe-S protein assembly (CIA) machinery. Required for the maturation of extramitochondrial Fe-S clusters. Regulates transcriptional complex which modulates gene expression in response to neuronal synaptic activity, particularly in the hippocampus.

High affinity for alpha-latrotoxin, an excitatory neurotoxin present in black widow spider venom which triggers the fusion of presynaptic vesicles with the plasma membrane.

Regulates the transcription of both RNA polymerase II and III small-nuclear RNA genes. Binds to the promoter

centrosome-associated contractile fibers via its interaction with CETN2.  
/ associates with the patched protein (PTCH) to transduce the hedgehog's proteins signal. Binc

so modulate alternative splicing in vitro. Represses the splicing of MAPT/Tau exon 10. May fun  
n prepropeptide gene. Alternatively spliced transcript variants have been identified and they m:  
rate-limiting enzyme in cholesterol biosynthesis as well as in the biosynthesis of nonsterol isop  
-coupled nucleotide excision repair which allows RNA polymerase II-blocking lesions to be rapi  
ind vasodilator agents. Numerous actions have been reported most related to the physiologic  
wards RAB32, RAB33B and RAB38 (PubMed:26620560, PubMed:21808068). Regulates the tra  
ation of AKT1 and AKT2.

nd ADP. The activity of this receptor is mediated by G proteins which activate a phosphatidylic  
verts transient diacylglycerol (DAG) signals into prolonged physiological effects downstream of

ces a non-coding RNA. Increased expression or amplification of this locus is associated with c:

ited transactivation by suppressing the binding between NR2C2/TR4 and the TR4-response ele  
oMed:19852954, PubMed:28530676). Probably acts as a transition zone protein required for lo  
on repair (HRR) pathway of double-stranded DNA, thought to repair chromosomal fragmentatic  
on repair (HRR) pathway of double-stranded DNA, thought to repair chromosomal fragmentatic  
ind catalyzes its covalent attachment to other proteins (PubMed:22496338). Catalyzes 'Lys-11'

ites homophilic and heterophilic interactions. In contrast to SCARF1, it poorly mediates the binc  
nd beta-tubulin, generating side chains of glycine on the gamma-carboxyl groups of specific glu

. It is required for formation of the earliest ATP-dependent splicing complex and interacts with s  
for RAB2A, RAB8A, RAB10 and RAB14. Isoform 2 promotes insulin-induced glucose transport  
at plays a protective role in the genotoxic stress response by stabilizing transcripts of genes inv  
) mitosis (G2 to M transition) by protecting the nucleus from cytoplasmically activated cyclin B1.  
hedgehog signaling. Required for centriole stability.

ylation of (R)-5-diphosphomevalonate to form isopentenyl diphosphate (IPP). Functions in the  
le in the initiation of DNA replication, and progression of DNA replication forks. GINS complex

ration.

core component of the circadian clock. The circadian clock, an internal time-keeping system, r  
ucture.

ing the asymmetric distribution of channels and receptors at the plasma membrane of polarize  
mic polypyrimidine tracts and mediates negative regulation of exons splicing. May antagonize ii

multiprotein PRC1-like complex, a complex class required to maintain the transcriptionally repressed state (PRC1) toward guanine nucleotide exchange factors like ARL2, ARL3, ARF1 and ARF6, but not for high concentrations of myo-inositol (an osmolyte) that result in impairment of cellular function. It mediates the Phoenixin-14 and Phoenixin-20 (By similarity). It produces long alternatively spliced non-coding RNAs. This genome region was observed to be

regulated as voltage-gated chloride channel. The presence of the conserved gating glutamate residue in the channel is essential for its function. It is a target of Japanese encephalitis virus (JEV) and Dengue virus (DEN) RNAs. (Microbial infection) Exhibits antiviral activity

in a postreplication repair or a cell cycle checkpoint function. May be involved in interstrand DNA cross-link repair. It is a component of the PRC1-like complex, a complex that plays a central role in assembly of kinetochore proteins and centromere function. It is involved in post-transcriptional regulation of gene expression in multicellular organisms

by phosphorylating serine- and arginine-rich (SF2) proteins. It is involved in post-transcriptional regulation of gene expression in multicellular organisms

as a subunit of the PRC2/EED-EZH2 complex, which methylates 'Lys-9' (H3K9me) and 'Lys-27' (H3K27me) on histone H3. The function seems also to involve CEP63, CDK5RAP2 and WDR62 through a stepwise assembly

of the complex. It is involved in post-transcriptional regulation of gene expression in multicellular organisms. It is required for the targeting of proteins from the mitochondrial matrix, across the inner membrane. It activates non-muscle myosin IIa. Activates the non-muscle myosin IIa complex by promoting

the transcription of both HES1-mediated N box-dependent transcriptional repression and binding of HES1 to E box elements. It is involved in transcription factor complexes. Inhibits NF-kappa-B activity without affecting its nuclear translocation. It methylates monomethylated 'Lys-20' (H4K20me1) and dimethylated 'Lys-20' (H4K20me2) on histone H4

for organization of muscle cells.

PcG proteins act by forming multiprotein complexes, which are required to maintain the transcriptionally repressed state

of genes. It is involved in the conversion of adenosine-34 to inosine in many tRNAs.

It is involved in the conversion of methionine from methionine and ATP. The reaction comprises two steps that are both catalyzed by this enzyme.

It is involved in the conversion of reduced cytochrome b5 to introduce the first double bond into saturated fatty acids

ion required for the demethylation of 4,4-dimethyl and 4alpha-methylsterols, which can be subse

e initiation of X inactivation mediated by Xist RNA that occurs during embryogenesis and in lyn

α, the last enzyme in the mitochondrial electron transport chain which drives oxidative phosphori  
oli cells of the testis, causes regression of the Muellerian duct. It is also able to inhibit the growt  
ture that promotes de novo centriole amplification in multiciliated cells that can generate more i  
ie that produces multiple alternatively spliced long non-coding RNAs. This gene is upregulated  
core component of the circadian clock. The circadian clock, an internal time-keeping system, r

n essential component of the MAP kinase signal transduction pathway. MAPK12 is one of the f  
α that participates in the import and insertion of multi-pass transmembrane proteins into the mit  
cruitment to the centrosome.

tion.

ation elongation. Has an important function at the level of mRNA turnover, probably acting dow  
core component of the circadian clock. The circadian clock, an internal time-keeping system, r

ade of glucocorticoid receptor (GR) transactivation at the nuclear receptor coactivator level, up  
rich can arise as a result of misincorporation of dUMP residues by DNA polymerase or due to c  
acts preferentially on N(8)-acetylspermidine, and also on acetylcadaverine and acetylputrescine  
a 1,6-linked mannose residues from glycoproteins. Involved in the degradation of free oligosac

otes transcription repression. Promotes transcription activation in differentiated myotubes (By s  
α (c-CPN) and transfers target proteins to it. Binds to nascent polypeptide chain and promotes  
ts, some of which may function as non-coding RNAs. One of the transcript variants encodes a  
\_1/TIF-IB complex, which is involved in the assembly of the PIC (preinitiation complex) during F  
tion.

ted cell cycle arrest and apoptosis by binding its transcriptional activation domain. Inhibits degr  
ormation and apoptosis; induces anchorage-independent growth and clonogenicity in lymphob  
se that specifically hydrolyzes the 5-phosphate of phosphatidylinositol-3,4,5-trisphosphate (Ptd  
h seems to be exclusively involved in the activation of NF-kappa-B and its transcriptional activit  
ucleosome structure of the chromosomal fiber in eukaryotes. Two molecules of each of the four  
ids to HOX or PBX proteins to form dimers, or to a DNA-bound dimer of PBX and HOX protein:  
α transcription between the neighboring SLX1B (SLX1 structure-specific endonuclease subunit  
(F(1)F(0) ATP synthase or Complex V) produces ATP from ADP in the presence of a proton gr  
αplex (ORC) that binds origins of replication. DNA-binding is ATP-dependent. The specific DNA  
K pathway and induce cell transformation when overexpressed. May act as a nuclear scaffold

or the platelet-aggregating snake venom protein rhodocytin. Rhodocytin binding leads to tyrosin RNAs that are involved in post-transcriptional regulation of gene expression in multicellular org may be involved in the development of multiple embryonic organs.

the surface of endosomes, where it recruits and activates the Arp2/3 complex to induce actin p and other cytokines through regulation on NF-kappa-B activity. Functions in the regulation of inf work organization typical for stem cells, characterized by reduced mitochondrial metabolism, low

cellular signaling cascades triggered by activated receptor-type kinases. Plays a role in FGFR1 1 coupled receptor for GABA, formed by GABBR1 and GABBR2 (PubMed:9872316, PubMed:9

tion.

m formation, as well as a later role in formation of somite-derived chondrogenic lineages.

of the homoallylic substrate isopentenyl (IPP) to its highly electrophilic allylic isomer, dimethylal

terotrimeric G protein-coupled receptors. Binds to membranes containing phosphatidylinositol 4 hich modulates the activity of the pore-forming alpha subunit. Alters the functional properties of cysteine-rich type II transmembrane proteins. These proteins localize to the endoplasmic reticu cing regulator. May regulate the mRNA splicing of genes such as CLK1. May act by regulating

rtate, 3-sulfino-L-alanine (cysteine sulfinic acid), and L-cysteate to beta-alanine, hypotaurine a

esis.

RNAs that are involved in post-transcriptional regulation of gene expression in multicellular org

ired for normal chromosome alignment and segregation and for kinetochore formation during r holipase and lysophospholipase activities, with a major role in membrane lipid remodeling and nit.

ceptor coupled to G proteins (PubMed:23763432, PubMed:23161870). Seems to act through : line (LPC) symporter, which plays an essential role for blood-brain barrier formation and functi chymotrypsin- and elastase-2-like activities. The gene encoding this zymogen is expressed spe

DP-ribosylation (ART) motif. It is a member of the ADP-ribosyltransferase gene family but enzyr omponents of the vertebrate eye lens.

negative regulator of RANKL-induced osteoclast precursor differentiation from bone marrow p

1/TIF-IB complex, which is involved in the assembly of the PIC (preinitiation complex) during F  
olved in a RAD9A-related damage checkpoint, a pathway that is important in determining wheth  
mediates phosphorylation of extracellular proteins and endogenous proteins in the secretory path  
methylates 'Lys-310' of the RELA subunit of NF-kappa-B complex, leading to down-regulate I

core component of the circadian clock. The circadian clock, an internal time-keeping system, r  
ation (PubMed:20869947). Increases steady-state levels and half-lives of a subset of mature n  
NK) cells and T-cell functions upon binding to their non-MHC ligands. May mediate missing sel  
aptor or scaffolding proteins. They provide a docking platform for the assembly of multimolecu  
permeable ion channel formed by PKD1 and PKD2 that is activated by interaction between PKD  
B-CUL3-RBX1) E3 ubiquitin-protein ligase complex required for synaptic transmission (PubMe  
on of the cytoskeleton. Binds to and sequesters actin monomers (G actin) and therefore inhibits  
8688764, PubMed:19969290). Induces activation of MAPK14/p38 and MAPK8/JNK MAPK cas  
transcription between the neighboring TEN1 telomerase capping complex subunit homolog (S  
quired for efficient phagocytosis of apoptotic cells. Modulates cellular glycosphingolipid and cho  
esis, consist of a small 40S subunit and a large 60S subunit. Together these subunits are com  
le in GPR24/MCH-R1 signaling.

cholesterol. Binds cholesterol or other sterols.

l with the transport of calcium from the cytoplasm to the extracellular space thereby maintaining  
ceptor cells, the signal transduction in immune cells as a Src family kinase activator, endosom

nd is a member of the 5' terminal oligo-pyrimidine class of genes. It is a small nucleolar RNA h  
factor (GEF).

ig sequence. This RNA interacts with heterogeneous nuclear ribonucleoprotein U and coats ch  
) cluster assembly factor that facilitates (Fe-S) cluster insertion into a subset of mitochondrial p

papillomavirus type 1 regulatory protein E2 loading onto mitotic chromosomes during DNA rep  
ss-of-function mutation in this gene cause Kohlschutter-Tonz syndrome. Alternate splicing resu

A exosome complex to pre-rRNA to mediate the 3'-5' end processing of the 5.8S rRNA; this fu

sis required for efficient 40S and 60S subunit production.

aptor coactivator, enhancing transcription through other coactivators such as NCOA6 and CITE

ificity. Has transaminase activity towards aminoadipate, kynurenine, methionine and glutamate

o. Inhibits platelet-derived growth factor (PDGF)-BB-induced smooth muscle cell migration and (F(1)F(0) ATP synthase or Complex V) produces ATP from ADP in the presence of a proton gr

gulation of organogenesis. Seems to be a regulator of SIX1, SIX6 and probably SIX5. Corepre

EF) for Ras and Rap1.

inoRNA) that is predicted to function as a guide RNA in 2-prime O-methylation of 28S ribosome

e biogenesis.

RNAs that are involved in post-transcriptional regulation of gene expression in multicellular org

sembly in response to cellular stress. |[Isoform 2]: Does not play a role in regulation of stress g g neurons by participating in regulation of cell survival, possibly as a neurospecific transcrip

opase complex which catalyzes the hydrolysis of ATP coupled to the transport of aminophosph cyte differentiation and suppresses osteoblast differentiation in the bone marrow. Enhances th

RNAs that are involved in post-transcriptional regulation of gene expression in multicellular org

ed coil motif. No function has been determined for the encoded protein. A pseudogene of this c

RNAs that are involved in post-transcriptional regulation of gene expression in multicellular org

is; it stimulates the secretion of both luteinizing and follicle-stimulating hormones.

RNAs that are involved in post-transcriptional regulation of gene expression in multicellular org

ind catalyzes its covalent attachment to other proteins. Catalyzes monoubiquitination. Involved

chromatin structure and consequently, chromatin-dependent processes such as transcription, DNA replication.

5' splice site selection for certain mRNA precursors. Mediates regulation of pre-mRNA splicing in a PKC-dependent manner.

Regulates tyrosine kinase receptor signaling. May increase IGF1 receptor phosphorylation under IGF1 stimulation.

Member of the Nucleosome Binding Protein (NBPF) family which consists of dozens of recently duplicated genes primarily located in the human genome.

Involved in the metabolism of various endogenous substrates, including fatty acids, steroid hormones, and neurotransmitters.

Overexpressed in tumor cells. This RNA may promote tumorigenesis by acting as a sponge for microRNAs. [1]

Interacts with E3 ubiquitin ligase (CRL) complexes (PubMed:21778237). May down-regulate activation of NF- $\kappa$ B.

Regulates the activity for beta-arrestin recruitment (PubMed:28827538). Shows a reciprocal regulatory interaction with p38.

Regulates caspase-induced apoptosis. Mediates survival of postmitotic Sertoli cells by suppressing death-promoted by p38.

Regulates the degradation of Notch signaling. Involved in limb development (By similarity).

MicroRNAs that are involved in post-transcriptional regulation of gene expression in multicellular organisms.

Involved in the modulation of auditory stimuli. Agonist binding may induce an extensive change in conformation of the protein.

Required for the maintenance of skeletal muscle structure and function. May play a role in the regulation of the APC/C complex.

Regulates the APC/C complex during G1/S transition by mediating deubiquitination of cyclin D1.

Calcium channels.

Required for phagocytosis of apoptotic cells and cell motility. Acts in association with DOCK1 and Rac1.

E-cadherin. It mediates adhesion of intra-epithelial T-lymphocytes to epithelial cell monolayers and is required for the

stabilization of normal baseline neurotransmitter release and for the induction and long-term maintenance of the

incorporation of MCM complex into pre-replication complex (pre-RC) (PubMed:9635433, PubMed:10811111).

Regulates cell death, possibly by acting on the transcription and RNA processing of apoptosis-related genes.

MicroRNAs that are involved in post-transcriptional regulation of gene expression in multicellular organisms.

Phosphorylates 'Ser-3' in cofilin and probably also dephosphorylates phospho-serine residues in DSK1.

Transport vesicles with the Golgi complex.

Required for the import of DNAJC19 into the mitochondrial matrix. Inhibits DNAJC19 stimulation of HSPA9/Mortalin ATPase activity.



g RNAs involved in RNA processing. Box H/ACA snoRNAs, such as SNORA81, direct the conv  
ys a critical role in synaptogenesis and synaptic plasticity by providing a platform for the postsy  
itter in the vertebrate brain, mediates neuronal inhibition by binding to the GABA/benzodiazepin  
ospholipids remodeling. May selectively cleave myristate (C14)-containing phosphatidylcholine  
ranslocon complex that mediates transport of signal peptide-containing precursor polypeptides  
r or repressor (PubMed:14671321). Inhibits several cytokine signaling pathways, such as TGF $\beta$

RNAs that are involved in post-transcriptional regulation of gene expression in multicellular org

chromosome segregation.

mbination. Functions in the recombinational DNA repair (RAD52) pathway. Dissociates RAD51

ar. It is not known if it has protein kinase activity and what type of substrate it would phosphory  
PP1. PP1 is involved in glycogen metabolism and contributes to the activation of glycogen syn

for IL19, IL20 and IL24. The IL22RA1/IL20RB dimer is a receptor for IL20 and IL24.

eric heterochromatin in interphase nuclei and for centromere formation and organization, chrom  
A small nucleolar RNAs, characterized by a consensus ACA motif positioned 3 nucleotides from  
D) is the pathway by which misfolded proteins in the endoplasmic reticulum are targeted to the

(TST) required to produce S-sulfanylg glutathione (GSS(-)), a central intermediate in hydrogen s

double bond of sterol intermediates during cholesterol biosynthesis (PubMed:11519011, PubMed:11519012). It produces a spliced long non-coding RNA that is thought to positively

regulate transcription (PubMed:10450). Expression of this pseudogene may be downregulated in non-small cell lung cancer (PubMed:10450).

dependent transcription possibly by interfering with CREBBP-dependent coactivation. May function

in promoting mono-ADP-ribosylation of target proteins.

Induced retinal lens fiber differentiation, probably by inhibiting FGF-mediated phosphorylation of

and inactivates the TSHB promoter. Binds to a minimal DNA-binding sequence 5'-[TC][AG][AG]TTT-3' in association with cyclin-dependent kinases (CDKs) (PubMed:18216018). Inhibited by the C

channel. May also facilitate the permeation of sodium ions.

Membranes associated with microglial activation following brain lesion.

is specifically to Cajal bodies, which are conserved subnuclear organelles that are present in the

and may play a role in cell adhesion.

transit peptide-containing proteins across the mitochondrial inner membrane. the PAM complex (PAM) is a complex of noncoding small nucleolar RNAs (snoRNAs), like SNORD43, which are generated during pre-

protein. May be involved in modulating cellular levels and biological functions of estrogens in the cytoplasm. (Note) transcription factor binds to the ovalbumin promoter and, in conjunction with another protein, is a member of a subfamily of the cadherin superfamily. The gene encodes a protein with an extracellular domain

on protein.

ms to play a role in spindle dynamics and cell division (PubMed:30715179, PubMed:30447097  
tion.

hioribose-1-phosphate (MTR-1-P) into methylthioribulose-1-phosphate (MTRu-1-P). Independe  
e (OST) complex that catalyzes the initial transfer of a defined glycan (Glc(3)Man(9)GlcNAc(2)

RNAs that are involved in post-transcriptional regulation of gene expression in multicellular org

RNAs that are involved in post-transcriptional regulation of gene expression in multicellular org

)-independent manner to the fast growing ends of actin filaments (barbed end) thereby blockin

\_Y6) genes located in the major histocompatibility complex (MHC) class III region on chromoso

s as a regulator of Sonic hedgehog (SHH) signaling and autophagy. Acts as a negative regulatc

and tumorigenesis. Involved in clathrin-dependent endocytosis.||May function as signaling mo  
gen matrix deposition.

ynthetase, which catalyzes the attachment of valine to tRNA(Val) for mitochondrial translation.

ed for calcium-dependent dendritic growth and branching in cortical neurons. Recruits CREB-bi

al activity and adiposity.

neural progenitor proliferation and evolutionary expansion of the brain neocortex by regulating th

ports pyrimidine nucleotides into and from mitochondria (PubMed:25320081). Transports pref

ases. As a GCM1 downstream effector, it is involved in placental development and positively re

DNA damage.

version of lysophosphatidylserine (1-acyl-2-hydroxy-sn-glycero-3-phospho-L-serine or LPS) into

(NHEJ), a major pathway to repair double-strand breaks in DNA. May act as a scaffold require

ort of Golgi vesicles to the endoplasmic reticulum. Has a microtubule plus end-directed motility.

ndothelium differentiation and vascular morphogenesis through the ACVRL1 receptor-dependent role in germ cell development. Determines the oogenic fate by activating key genes for the ooperatively with DP proteins through the E2 recognition site, 5'-TTTC[CG]CGC-3' found in the activity. The exact function of this protein is not known. Studies with chimeric proteins (replacin annels (PubMed:1309651, PubMed:8107964, PubMed:15615847). Regulates the activity of L-t

for centrosome separation and productive cytokinesis during cell division. Dephosphorylates Sl al regulator of cellular and organ growth, development, migration, differentiation and survival at

maintain the centrosome integrity in interphase. Suppresses centrosome disjunction by inhibiti

sation for the expression level of X-linked genes from the single X in males and the two in fema nc finger transcription factors EGR1 and EGR2. Isoform 2 lacks repression ability (By similarity mology (CH) domain, a PDZ domain, and a LIM domain, and may be involved in protein-protei tion.

), the last enzyme in the mitochondrial electron transport chain which drives oxidative phospho port of large neutral amino acids. Has narrower substrate selectivity compared to SLC7A5 and :

ptional repressor. Represses target gene transcription by recruiting HDAC1 and HDAC2 histon illin components of SCF-type E3 ubiquitin ligase complexes from the NEDD8-conjugating E2 e a long non-coding RNA is derived by RNase P cleavage of a tRNA-like small ncRNA (known a

xchange activity for CDC42 (By similarity). May be a guanine-nucleotide exchange factor (GEF)

ntiapoptotic factor.

vation by cytokines and lipopolysaccharide (LPS).

nt retrograde axonal transport. May function as the motor for the transport of multivesicular bod noglobulin light chains that participates in the antigen recognition (PubMed:24600447). Immun transmembrane 4 superfamily, also known as the tetraspanin family. Most of these members a omiscuously GPI-anchored ephrin-A family ligands residing on adjacent cells, leading to contac l in energy homeostasis and protein translation. Phosphorylates EEF1A1, GYS1, PDX1 and RF essory components of the cytoplasmic dynein 1 complex that are thought to be involved in linki nules and secretion of hormones in the pancreas and the pituitary. Interacts with vesicles conte

s regulators of cell proliferation. Alternative promoter usage and splicing results in multiple transmembrane signaling activity that activate cyclic AMP. Has a potential role in modulating a number of brain functions and metabolism of plasma lipoproteins. Synthesized mainly in the liver and secreted into plasma where it regulates cell morphology and cytoskeletal organization. Required in the control of cell shape.

beta-1,4-N-acetylgalactosamine transferase activity. Transfers glucuronic acid (GlcUA) from UDP-glucuronic acid to a complex that stimulates the recombination-dependent repair of stalled or collapsed replication forks. Interacts with receptor LRP6, leading to increased activity of the canonical Wnt signaling pathway (PubMed:15122222). A signaling protein that may play a role in calcium-mediated intracellular processes.

Regulatory subunit of the DNA replication origin complex that plays a major role in DNA repair. The 9-1-1 complex is recruited to DNA replication forks.

secretory vesicles.

hydrolysis of ATP. May accumulate ATP and other nucleotides in secretory vesicles such as adrenal chromaffin granules in the endoplasmic reticulum and the Golgi apparatus.

(PubMed:24359566). May play a role in myeloid maturation and in the development and/or maintenance of myeloid cells.

May play a role in inflammation and exerts its effects on endothelial cells in an autocrine fashion. Acts as a repressor. Plays a role in limb development.

is 'Lys-6'- and 'Lys-11'-linked polyubiquitin. Also hydrolyzes heterotypic (mixed and branched) ubiquitin chains. A noncoding small nucleolar RNAs (snoRNAs), like SNORD83B, which are generated during processing of rRNA. A complex that is required for normal biogenesis of lysosome-related organelles (LRO), such as peroxisomes. Some histone methyltransferase complexes may regulate transcription through recruitment of this protein. May function as a ligand for MHC class II (MHC-II) on antigen-presenting cells (APC), facilitating trafficking of membrane cargo, including EGFR.

phosphatase with broad substrate specificity (PubMed:17590538). Preferentially catalyzes the cleavage of phosphatidylcholine superfamily, a novel family that is similar to the chemokine and the transmembrane 4 superfamily. Its association with carbonic anhydrase CA2 forms a bicarbonate transporter.

hydrolyzation of proline imidic peptide bonds in oligopeptides and may therefore assist protein folding.

is secreted by adipocytes that regulates glucose and lipid metabolism (PubMed:12802337, 12802338).

is involved in the assembly of the Z-disk. May functionally link sarcomeric actin to the desmin intermediate filaments.

The C-terminal region is highly homologous to the bornavirus nucleocapsid N protein that binds viral RNA.

specifically trimethylates 'Lys-315' of VCP/p97; this modification may decrease VCP ATPase activity of cell surface receptor kinases with specific signaling pathways. Binds to, and suppresses entry of Hendra virus and Nipah virus. Cell surface transmembrane ligand for Eph receptors, a family

of the morphological alterations required for cell growth and motility. Interaction with ARF6 may regulate the guanine nucleotide exchange factor family.

Regulates the expression of several microRNAs that are involved in post-transcriptional regulation of gene expression in multicellular organisms. In an inactivated (closed) state. Modulates calcium current when coexpressed with CACNA1C

and to HCFC1. Suppresses the expression of HSV proteins in cells infected with the virus in a dose-dependent manner. Mediates a wide range of physiologic effects, including the modulation of morphine-induced analgesia, elevation of blood pressure, and regulation of the immune system.

Regulates the expression of ESR1 target genes. Can act in cooperation with MED1.

Regulates the expression of alpha-latrotoxin, an excitatory neurotoxin present in black widow spider venom which triggers the release of neurotransmitters. Regulates S.aureus adherence to desquamated nasal epithelial cells via clfB, and hence may play a role in the pathogenesis of skin infections. This interaction is important in mediating thymocyte interactions with thymic epithelial cells. Regulates opposing regulatory activities toward small GTP-binding proteins. The C-terminus is a GTPase-activating protein that terminates transmission at neuromuscular junction by rapid hydrolysis of the acetylcholine released into the synaptic cleft. Regulates the expression of actin and is thought to anchor actin to a variety of intracellular structures. This is a bundling protein.

Regulates the expression of adenosine and 2-deoxyadenosine (PubMed:8452534, PubMed:16670267). Plays an important role in the regulation of AP-2. Adaptor protein complexes function in protein transport via transport vesicles in dendrites. Regulates the expression of human coronavirus 229E/HCoV-229E. In case of human coronavirus 229E (HCoV-229E) infection, it suppresses anti-coagulant properties. Also cleaves the cyclic bond of inositol 1,2-cyclic phosphate to release inositol. Regulates the expression of amyloid-beta precursor protein.

Regulates the expression of urea cycle arginine metabolism and also in down-regulation of nitric oxide synthesis. Extrahepatic expression of urea cycle enzymes (PubMed:8537347).

Regulates the expression of sulfatase family. Sulfatases are essential for the correct composition of bone and cartilage matrix. Regulates the expression of cartilage and bone matrix during development. Has no activity toward steroid sulfates.

Regulates the expression of p53, a tumor suppressor or activator, depending on the context. Binds to NF-E2 DNA binding sites. Plays an important role in the regulation of gene expression. May function in the response of hemopoietic cells to external signals and in maintaining the cell cycle. Regulates the transcriptional program in various innate and adaptive immune tissue-resident lymphocyte T cell types. Plays a central but diverse modulatory roles in various signaling processes involved in the regulation of cell death through different apoptotic signaling pathways (PubMed:27076518, PubMed:15102863). Regulates the expression of several cytoplasmic AU-rich element (ARE)-containing mRNA transcripts by promoting the formation of a complex with poly(ADP-ribose) and nicotinate-adenine dinucleotide phosphate, the former a second messenger. Regulates the expression of actomyosin interactions in smooth muscle and nonmuscle cells (could

ly blocks the barbed ends of actin filaments but does not sever preformed actin filaments. May  
protease which catalyzes limited proteolysis of substrates involved in cytoskeletal remodeling and  
spases responsible for apoptosis execution. At the onset of apoptosis it proteolytically cleaves p  
aveolar membranes (PubMed:11751885). Forms a stable heterooligomeric complex with CAV2  
ement in spermiogenic differentiation.

n early hematopoiesis by mediating the attachment of stem cells to the bone marrow extracellu  
or enterovirus 71.||Acts as a lysosomal receptor for glucosylceramidase (GBA) targeting.

ATP and other nucleotides to regulate purinergic neurotransmission. Could also be implicated i  
cell-cell interactions, cell adhesion and migration, helping them to sense and respond to chang

ide]: Binds to the peptide-binding site of MHC class II alpha/beta heterodimers forming an alph  
duction and vesicle trafficking to enable polarized secretion and/or membrane deposition of im

n; preferentially mediates homotypic cell-cell adhesion by dimerization with a CDH2 chain from  
hesion proteins (By similarity). They preferentially interact with themselves in a homophilic ma

hesion proteins. They preferentially interact with themselves in a homophilic manner in conne  
hesion proteins. They preferentially interact with themselves in a homophilic manner in conne

sponds by an extensive change in conformation that affects all subunits and leads to opening c  
lyl-peptidase I activity (PubMed:11054422, PubMed:19038966, PubMed:19038967). May act a

component of glomerular basement membranes (GBM), forming a 'chicken-wire' meshwork tog  
component of glomerular basement membranes (GBM), forming a 'chicken-wire' meshwork tog

collagen (fibrillar forming collagen). It is a minor connective tissue component of nearly ubiquit  
collagen-containing fibrils, the COL1 domain could be associated with the surface of the fibrils, a

folded protein response (UPR) pathway by activating UPR target genes induced during ER stre  
he regulation of survival, proliferation and differentiation of hematopoietic precursor cells, espe

ent.

icipate in intracellular degradation and turnover of proteins (PubMed:12220505). Cleaves matrix  
one resorption and may participate partially in the disorder of bone remodeling. Displays poten

normal cellular protein degradation and turnover.

or adenovirus type C.|| (Microbial infection) Acts as a receptor for Coxsackievirus B1 to B6.||Cor  
'Lys-63'- and linear 'Met-1'-linked polyubiquitin chains and is involved in NF-kappa-B activation

d in the regulation of apoptosis, autophagy, transcription, translation and actin cytoskeleton rec  
avirus IBV replication.|| (Microbial infection) Required for HIV-1 Rev function as well as for HIV-1

by dephosphorylating both Thr and Tyr residues on MAP kinases ERK1 and ERK2.

tive with phosphotyrosine, phosphoserine and phosphothreonine residues. The highest relative  
phosphatase substrates and negatively regulates mitogen-activated protein kinase activity, pre

1.  
osine 1-phosphate (S1P). S1P is a bioactive lysophospholipid that elicits diverse physiological  
tein with F-actin-binding activity that induces F-actin bundles formation and stabilization. Its F-a

omiscuously transmembrane ephrin-B family ligands residing on adjacent cells, leading to cont

on. Binds specifically the DNA GGAA/T core motif (Ets-binding site or EBS) in gene promoters  
VA sequences containing the consensus pentanucleotide 5'-CGGA[AT]-3'.

biosynthesis of heparan sulfate (HS). Important for both skeletal development and hematopoie  
ymes coupled to G proteins (PubMed:28445455). Its function is mediated through the activation  
e that participates in extracellular matrix degradation and involved in many cellular processes ir  
zation, directed cell migration and modulating cell-cell contact.

bisphosphate to fructose 6-phosphate in the presence of divalent cations, acting as a rate-limit  
BR1, the TGF-beta type I serine/threonine kinase receptor, preventing TGF-beta receptor activa  
the actin cytoskeleton. May promote orthogonal branching of actin filaments and links actin fil  
entral role in muscle cells, probably by functioning as a large actin-cross-linking protein. May be  
all-surface receptor for VEGFC and VEGFD, and plays an essential role in adult lymphangiogen  
it plays a role in many biological processes including regulation of cell growth and survival, cell  
sing S-adenosylmethionine as the methyl donor (PubMed:26003046, PubMed:24415674, Pub  
velope phosphatidylserine to the TAM receptor tyrosine kinase Axl to mediate viral entry by apc  
re cleavage reactions. Exhibits antiviral activity against influenza virus. Promotes oxidative killin  
re cleavage reactions, but the major reaction product is GDP (PubMed:8706832). Exhibits antiv  
f GTP cyclohydrolase 1. This inhibition is reversed by L-phenylalanine.

tracellular glutathione (gamma-Glu-Cys-Gly), glutathione conjugates, and other gamma-glutar  
ide channels. GLRB does not form ligand-gated ion channels by itself, but is part of heteromeri  
date several single chain phospholipids and fatty acids, GM2A also exhibits some calcium-inde  
proteins) are involved as modulators or transducers in various transmembrane signaling syste  
e density of dopamine receptors DRD2 by sequestering them as an intracellular pool.||Guanin  
ates preferentially the activated forms of a variety of G-protein-coupled receptors (GPCRs). Su  
it replication of hepatitis C virus (HCV) by promoting the interaction between VAPA and HCV vi

in human erythrocyte membranes. The blood group Gerbich antigens and receptors for Plasm  
chemotactic activity for both monocytes and neutrophils.||Thrombin inhibitor activated by the g  
T-bet-dependent maturation of Th1 cells as well as maintenance of Th1-specific gene expressi  
groove of A+T rich regions in double-stranded DNA. It is suggested that these proteins could f  
nbryonic development, establishment of tissue-specific gene expression and regulation of gene  
Plays an important role in degrading histamine and in regulating the airway response to histam  
ed:10816573). Stimulates ATP hydrolysis, but not the folding of unfolded proteins mediated by  
guidance of migrating neurons as well as axons during development, synaptic plasticity as wel  
/ be involved in signal transduction. Involved in regulation of the catalytic activity of the phosph  
of T-lymphocytes (PubMed:8178155). Stimulation by IL15 requires interaction of IL15 with cor  
s a receptor for laminin on platelets (By similarity). Integrin alpha-6/beta-1 (ITGA6:ITGB1) is pr  
atory region of type I IFN and IFN-inducible MHC class I genes (the interferon consensus sequ  
ase that acts on single-stranded RNA and also has minor activity towards single-stranded DNA



It is activated by phosphatidylinositol 4,5-bisphosphate and that probably participates in control factor for membranous organelles.

It is thought to mediate the attachment, migration and organization of cells into tissues. It is thought to mediate the attachment, migration and organization of cells into tissues. It is thought to mediate the attachment, migration and organization of cells into tissues. It is a chemoattractant (PubMed:9642261). It also inhibits angiogenesis (PubMed:24333696). Suppresses methylene A (CoA) desaturase that introduces a cis double bond between the preexisting double bond. It is a tumor suppressor. Altered expression of this protein and disruption of the molecular pathway it is involved in leads to oxidative deamination of peptidyl lysine residues in precursors to fibrous collagen and elastin (PubMed:1053055).

It is involved in the oxidative deamination of lysine residues on target proteins leading to the formation of deaminated lysine. It is involved in cell adhesion in maintaining cell shape and motility. In addition to these structural functions, it may be involved in related proteins that may regulate their ligand binding activity along the secretory pathway.

It may play a specific role in immune response regulation. Provides the membrane anchor for the protein. It has antiproliferative properties and ability to induce cell cycle arrest. Binds to the Delta-like 1 response protein. It is a type 1 receptor kinase. SMAD1 is a receptor-regulated SMAD. It is involved in the formation of the endothelial monolayer at intercellular junctions in vascular tissue. Its expression is regulated specifically to the MEF2 element, 5'-YTA[AT](4)TAR-3', found in numerous muscle-specific, growth factor-responsive promoters. It is involved in the entry of *Listeria monocytogenes* internalin InIB, mediating entry of the pathogen into cells. It is involved in the formation of microfibrils.

It is involved in the formation of the elongation complex (SEC), a complex required to increase the catalytic rate of RNA polymerase II at one site in the helical domain. Also cleaves collagens of types VII and X (PubMed:2557822, PubMed:1053055). It is involved in the formation of I, III, IV, and V; weakly collagens III, IV, and V. Activates procollagenase.

It is involved in the formation of epithelial malignancies.

It is involved in the formation of components of the extracellular matrix. May activate progelatinase A.

It is involved in the formation of components of the extracellular matrix, such as aggrecan and cartilage oligomeric matrix protein. It regulates myeloid cell activity in a variety of tissues.

It is involved in the formation of Dengue virus envelope protein E. It acts as a phagocytic receptor for bacteria. It is a hydrolase for proteins that have been inactivated by oxidation. Catalyzes the reversible oxidation-reduction of MAX to form a sequence-specific DNA-binding protein complex which recognizes the core sequence and trapping it in the cytoplasm. Inhibits DNA-binding of NF-kappa-B p50-p65 and p50-c-Rel complex. It is a core component of the circadian clock. The circadian clock, an internal time-keeping system, regulates protein kinase C-mediated molecular cascades during synaptic development and remodeling. It is involved in the formation of membrane permeable nucleosides. Exhibits AMP-, NAD-, and NMN-nucleosidase activities.

It is unlikely to function as a tyrosine kinase in vivo (PubMed:25029443). Receptor for ligand WNT-1. It is involved in the formation of amine. After binding to L-DOPA, stimulates Ca(2+) influx into the cytoplasm, increases secretion of a viral enzyme which plays a critical role in cellular innate antiviral response. In addition, it may be involved in the formation of

plays a role in a variety of different signaling pathways including cytoskeleton regulation, cell migration, post-translational modification of inactive peptidylglycine precursors to the corresponding bioactive form, regulation of intracellular cAMP levels and respiration (By similarity). Involved in the regulation of mitochondria morphology by phosphorylation of the E1 subunit PDHA1, and thereby regulates glucose metabolism and prevents apoptosis. Cell adhesion molecule which is required for leukocyte transendothelial migration. Part of the ATPase complex which catalyzes the hydrolysis of ATP coupled to the transport of aminophospholipids, 1,3-bisphosphate.

Integrin-binding ligand, N-linked glycoprotein)-derived ASARM peptides, thus regulating their biological activity. Contains hydroxylysine-Gly- sequences in collagens. These hydroxylysines serve as sites of attachment for carbohydrate chains on microvilli, hair cell stereocilia, and fibroblast filopodia. May play a role in the regulation of bone mineralization and free cholesterol from triglyceride-rich lipoproteins (low density lipoproteins or LDL and very low density lipoproteins) (PubMed:20877282, PubMed:21912513). Plays a role in GABAergic synapse development. May regulate substrate selectivity and catalytic activity, and also might direct the localization of the catalytic subunit of the protein tyrosine kinase complex which is characterized by its ability to cleave peptides with Arg, Phe, Tyr, Leu, and Met. Acts as a cofactor in peptide and protein thiols to disulfides with the reduction of oxygen to hydrogen peroxide. Acts as a negative regulator of FcεRI-mediated signal transduction leading to cytokine production and degranulation. May also possess an intrinsic protein tyrosine phosphatase activity (PTPase) and dephosphorylates EphA2. May also mediate hydrophobic interactions. May play a key role in signal transduction and growth control.

Part of the heparan sulfate proteoglycans, including chondroitin sulfate proteoglycans and heparan sulfate proteoglycan (HSPG). Acts as a GTPase which cycles between an active GTP-bound and inactive GDP-bound state. In active state, it is involved in a variety of cellular processes including gene expression, cell migration, cell proliferation, oncogenic transformation, and cell cycle progression. Acts as a guanine nucleotide exchange factor activating both Ras and RAC1 through the exchange of bound GDP for GTP. Acts as a receptor in the Golgi compartment and as a clearance receptor on the cell surface. Required for protein transport. May be involved in calcium-dependent cuticle cell differentiation, hair shaft and hair cuticular barrier formation. Acts as a receptor CCR2 (PubMed:9837883, PubMed:10587439, PubMed:10529171). Signals through binding to eosinophils and neutrophils, but not neutrophils. Augments monocyte anti-tumor activity. Also induces chemotaxis to receptor CCR6. Signals through binding and activation of CCR6 and induces a strong chemotactic response. Signals through binding and activation of its receptors (CXCR1 and CXCR2). In addition to its role in chemotaxis, it acts as a coreceptor for chemokines. Binds to integrins. Binds to CX3CR1 (PubMed:23125415, PubMed:9931005, PubMed:21829356). Binds to and activates the receptor for enterovirus 71. A SLe(x)-type proteoglycan, which through high affinity, calcium-dependent interactions, may function as modulators of Wnt signaling through direct interaction with Wnts. They have a role in the regulation of cell adhesion to galactose-containing acceptor substrates.

Acts as a major actin binding site (PubMed:21685497, PubMed:23184945). Organizes filamentous actin into bundles. May be involved in the production of reactive oxygen species which are normally produced within the cells and which are toxic to biological systems.

Contains the consensus sequence 5'-ACCAAAG-3' (By similarity). Acts as a transcriptional activator (By similarity). May be involved in protein-protein interactions. May contribute to various neuronal mechanisms in the central nervous system. May be involved in the regulation of the cell membrane skeleton.

Its activity is activated following engagement of many different classes of cellular receptors including integrins, G-protein-coupled receptors, and tyrosine kinases.

tween the actin cytoskeleton and the membrane. Is among the first costameric proteins to associate with transporter associated with antigen processing (TAP) and in the assembly of MHC class II (along with collagenases) and irreversibly inactivates them by binding to their catalytic zinc cofactor. Inhibits a number of transcription factors. Inhibits the transcriptional activation mediated by PAX5, and osteoclast activity (By similarity). Involved in interleukin-4-induced M2 macrophage polarization (By similarity). Promotes the efficient obliteration of the intercellular space.

(E3 ubiquitin-protein ligase complex involved in regulation of cytoskeleton structure and function of NF-kappa-B and JNK. Plays a role in the regulation of cell survival and apoptosis. The ubiquitin-protein ligase complex, composed of E1, E2, and E3, is involved in the ubiquitination of NF-kappa-B and MAP kinases, and plays a central role in the regulation of B-cell survival. It links members of the tumor necrosis factor receptor family to different signaling pathways by using ATP to link its C-terminal glycine residue and thereafter linking this residue to the side chain of a cysteine residue on E2, and catalyzes its covalent attachment to other proteins (PubMed:8132613, PubMed:17588522, PubMed:17588522). Involved in Golgi, the initial step of the glucosylceramide-based glycosphingolipid/GSL synthetic pathway, and in the transport of cytoskeleton to the plasma membrane.

of type I collagen mRNAs for CO1A1 and CO1A2. Vimentins are class-III intermediate filament proteins that are involved in endocytosis. In order to be internalized, the receptor-ligand complexes must first cluster into clathrin-coated vesicles. The clathrin-coated vesicle (DLB), a membranous organelle predominantly present in bulbous dendritic appendages, is formed by the clustering of seven transmembrane receptors. Functions in the canonical Wnt/beta-catenin signaling pathway. The gene is located at the pseudoautosomal boundary on the short (p) arm of chromosome X. The three ubiquitin-proteasome system. May act by anchoring ubiquitinated proteins to the proteasome. Prolongs cell survival.

in embryogenesis and in adult hematopoietic cells.

likely to participate in H<sub>2</sub>O<sub>2</sub> metabolism and peroxidative reactions in the cardiovascular system. It is a core component of steroid receptors such as NR3C1, NR3C2 and ESR1. Also modulates transcriptional repression of estrogen receptors. An important downstream effector of CDC42 and plays a role in the regulation of cytoskeleton and cell migration. Mediates signaling and functions both in regulating cell migration and immune responses. Promotes cell survival. The proteolytic action may subserve structural reorganizations associated with learning and memory. Involved in the longitudinal organization of myelinated axons. Plays a role in the formation of functional distinct vesicles. Mediates the transport of proteins that may be involved in vesicular transport. A similar protein in mice inhibits the calcineurin-dependent pathway. Inhibits the initiation factor 3 (eIF-3) complex, which is required for several steps in the initiation of protein synthesis. Involved in the biliary and intestinal excretion of organic anions. Acts as an alternative route for the export of bile acids. Involved in the transport of beta-type neuregulin isoforms which are involved in neurogenesis and synaptogenesis, such as in the formation of the methyltransferase RNMT:RAMAC complex that methylates the N7 position of the added guanine cap on RNA. Involved in the signaling of TNFRSF10A/DR6, TNFRSF10B/TRAILR2, TNFRSF10C/TRAILR3, TNFRSF10D/TRAILR4 and possibly also of other TNF-related cytotoxic ligands TNFSF14/LIGHT, TNFSF15 and TNFSF6/FASL. Protects against apoptosis. Involved in the signaling of TNFRSF10A/DR6 (PubMed:10549288). The adapter molecule FADD recruits caspase-8 to the activated TNFRSF10A/DR6. Involved in embryonic development, cell proliferation and cell differentiation, and is required for normal hematopoiesis and assembly of the actin cytoskeleton. Binds to activated CDC42 but does not stimulate its activity.

F5 and ARF6. Regulates the formation of post-Golgi vesicles and modulates constitutive secretion of GM3 (alpha-N-acetylneuraminyl-2,3-beta-D-galactosyl-1, 4-beta-D-glucosylceramide).

in macroautophagy (aggrephagy). Functions as a bridge between polyubiquitinated cargo and a GTPase. Catalyzes the exchange of GDP for GTP.

Cell cycle at the G1/S (start) and G2/M (mitosis) transitions. May primarily function in the control of cell cycle. Involved in vesicle trafficking (PubMed:24788816). Essential for maintaining the integrity of the endoplasmic reticulum. Activates specific Rho GTPase family members, thereby inducing various signaling mechanisms in the cytoskeleton. May regulate WAS actin-bundling activity. Bridges the interaction between ABL1 and PTPN22. Catalyzes the rapid transport across the plasma membrane of many monocarboxylates such as neurotransmitters. May indirectly regulate the activity of the plasma membrane dopamine transporter SLC6A3 and may regulate both serine/threonine and tyrosine kinase activities. Enhances the transcriptional activity of transcription factors at cell-cell junctions. May regulate acid-induced ASIC3 currents by modulating its expression at neuronal cells.

Involved in the conversion of all-trans-retinol in the presence of NADPH.

Increased expression augments motility of gliomas. Promotes also axonal regeneration (By similarity). Involved in the signaling pathway. It associates with inactive heteromeric TGF-beta and activin receptor complex 1. Involved in the binding of a glycine residue of certain cellular and viral proteins.

Involved in the regulation of cell adhesion receptors such as integrins and cell-cell junctions.

Involved in the regulation of histone H3K9me3, histone H3K27me2 and histone H3K27me3, due to the presence of a NADPH-dependent 5'-adenylyl sulfate (PAPS) as sulfonate donor to catalyze the transfer of sulfate to position 6 of histone H3. Involved in the response to environmental stress and cytokines such as TNF-alpha. Appears to act as a co-receptor. Binds and cross-links cytoplasmic regions of GRM1, GRM5, ITPR1, DNMT3, RYR1, RYR2, SH3BP1 and other proteins. Selectively mediates JNK signaling by aggregating specific components of the JNK signaling pathway. Involved in the regulation of cell adhesion receptors such as integrins and cell-cell junctions. Involved in the destruction of aggregated proteins and activates transcription.

Involved in the regulation of SIAH1 and inhibits proteasomal degradation of target proteins. Isoform 2 inhibits autophagy and podosome formation, extracellular matrix degradation and invasiveness of some cancer cells. Involved in the transport of vesicles to the trans-Golgi network (TGN) and regulates vesicular transport between the endoplasmic reticulum and Golgi apparatus. Involved in the regulation of guanine nucleotide exchange factor activity compared to other isoforms.

Involved in the regulation of dendritic spines, probably via regulating SIPA1L1 levels at the postsynaptic density of synapses. Involved in tumor metastasis in a variety of organ sites, most likely through an interaction with the actin cytoskeleton. Involved in the regulation of both the extent of secretion and the sensitivity of mast cells to stimulation with calcium (EGF). Involved in the regulation of small GTPase RAB22A, converting active RAB22A-GTP to the inactive form RAB22A-GDP. Involved in the regulation of IKK regulation which constitutively binds TBK1 and IKKepsilon playing a role in antiviral innate immunity. Isoform BimL is more potent than isoform BimEL. Isoform Bim-alpha1, isoform Bim-alpha2 and isoform Bim-alpha3 are involved in cytokine-induced, integrin-mediated T lymphocyte adhesion and migration, acting upstream of RAC1. Involved in the phosphorylation of CTNNB1. Regulates CTNNB1 function both in cell adhesion and signaling. May

mediated by association with deadenylase subunits of the CCR4-NOT complex (PubMed:8632) in the transmission of signals from tyrosine kinase receptors and small GTPases to the actin cytoskeleton in response to Gram-positive bacteria and fungi. Specifically recognizes diacylated and, to a lesser extent, monoacylated lipopeptides. Involved in the adaptive immune response and in neuronal control of puberty. Induces the collapse and paralysis of neuronal growth cones. Involved in the adaptive immune response.

Contains several transient phosphorylation sites and PEST motifs. Conservation of proteins with PEST sequences is observed in several species.

1). Plays a part in calcium-regulated keratinocyte activation in epidermal repair mechanisms. Has a role in central nervous system development.

Involved in the regulation of integrin-mediated signaling and subsequent remodeling of the cytoskeleton. Plays a role in axon guidance, neurite outgrowth, and the actin cytoskeleton. May act downstream of CDC42 to induce actin filament assembly leading to cell migration. Has a role in the organization of autophagic response and ubiquitination upon lysosomal and phagocytosis. Involved in cell adhesion through its different partners. During development plays a role in blood and lymphatic vessel development. In G1-arrested cells only, inhibits S phase. Recruited and tyrosine phosphorylated by several receptors and tyrosine kinases to the Ras signaling pathway. Plays a role in the inner ear and in hearing. Involved in the regulation of 'Lys-4' of histone H3, thereby playing a central role in histone code (PubMed:24952722, PubMed:15125440). Involved in cell polarity and epithelial lumen formation (By similarity). Plays also an essential role in ciliogenesis. Involved in signal transduction.

Involved in the regulation of enzymes that catalyze the hydrolysis of acyl-CoAs to the free fatty acid and coenzyme A (CoA). Involved in the adaptive immune response. Regulates the proliferation of activated T-cells. Regulates the relative activity of the protease which catalyzes limited proteolysis of substrates involved in cytoskeletal remodeling and in the degradation of COMP.

Involved in kinase A. May be involved in establishing polarity in signaling systems or in integrating PKA-activated signaling.

Widely distributed in basement membranes. Binds to collagens I and IV, to perlecan and to laminin. Involved in the PI3K pathway. Binds inositol tetrakisphosphate (IP4) with high affinity. Might be a specific IP4 receptor. Involved in apoptosis. May be involved in detachment-mediated programmed cell death. May mediate apoptosis. Involved in cell migration, a motif present in a variety of functionally distinct proteins and known to be involved in proliferation. Involved in the formation of synapses and neuronal cell signaling. Could be an adapter protein linking ion channels to the cytoskeleton. Involved in COPII (COPII) which promotes the formation of transport vesicles from the endoplasmic reticulum (ER) to the Golgi apparatus and activates transcription. Binds to the canonical E box sequence 5'-CACGTG-3'. Plays a role in the regulation of lysosome trafficking, including endocytic trafficking of EGF-EGFR complexes and GABA-A receptor complex) for C1q, mannose-binding lectin (MBL2) and pulmonary surfactant protein A (SPA). Involved in that promotes endoplasmic reticulum-associated endosome fission (PubMed:30220460). Lysine methylates 'Lys-9' of histone H3, thereby playing a role in histone code. Does not demethylate histone H3. Involved in the regulation of -containing messengers.

Involved in the regulation of carcinoma (HCC) cells through interaction with SIAH1, a mediator of apoptosis. May also have a role in the regulation of cell growth.

d CDC42.

16. Promotes MAP3K7 activation in the IL1 signaling pathway. The binding of 'Lys-63'-linked p for Rab family protein(s).

metabolism of fatty acids at different levels. Acts as a magnesium-dependent phosphatidate ph factor.

CF (SKP1-CUL1-F-box protein) E3 ubiquitin-protein ligase complex (PubMed:25778398). Durir that antagonizes canonical Wnt signaling by triggering lysosome-dependent degradation of Wr ogenesis. Binds to microRNAs MIR7-1, MIR16-2 and MIR29A hairpins recognizing the 'ATA(A/ sitively regulates ciliary Hedgehog (Hh) signaling (By similarity). Required for proper limb morph oprotein (RNP) complex that is essential for the replication of chromosome termini (PubMed:19 which promotes the processing of GLI3 into GLI3R during neural tube development. Recruited bic molecules and promotes their transfer between the different cellular sites. Binds with high ε native splicing events by binding to 5'-UGCAUGU-3' elements. Prevents binding of U2AF2 to th on of the alpha 2(I) collagen gene where it binds to the single-stranded polypyrimidine sequenc IA4D and SEMA4G that plays an important role in cell-cell signaling (By similarity). Plays a role ation and axon guidance. Mediates cell-cell adhesion via its interactions with ADGRL3 and prol is and the hemichannels involved in the ATP release and nucleotide permeation (PubMed:169

to 6-phosphogluconate.

glutamyl peptides. Has a bias against acidic and tryptophan residues adjacent to the N-termina ng of the amyloid precursor protein (APP). Cleaves APP, between residues 690 and 691, leadin

ophic peptide (BINP), a synthetic 13-mer peptide.

on factor involved in defense response to virus and as a regulator of DNA end resection at stalk ether with RECK to enable brain endothelial cells to selectively respond to Wnt7 signals (WNT

f signaling by receptor tyrosine kinases, through a mechanism that involves enhancement of re RF in oligodendrocyte differentiation and myelination. Interacts with the C-terminal of MYRF inl associates with both cell and endoplasmic reticulum (ER) membranes (PubMed:16143324). Cε ATG16L1 complex to omegasomes and preautophagosomal structures, resulting in ATG8 famil ediate the monomeric transport of lipids by shielding a lipid from the aqueous environment and gnaling cascades, including signaling via muscarinic acetylcholine receptor CHRM2 and dopan

ie promoter region of target genes. Plays a role in the regulation of the cell cycle and of the Wr rate (PIP2). May play a role in the organization of nuclear PIP2, cell division and cell survival (F inhibiting LRP5/6 interaction with Wnt and by forming a ternary complex with the transmembra

way that involves the activation of NF-kappa-B. Can also promote apoptosis mediated by BAX and caspase-8. Enhances CDK1 activity. May contribute to the regulation of the cell cycle. May inhibit apoptosis and inflammation. Promotes caspase-mediated apoptosis involving predominantly caspase-8 and caspase-9. Contains 2 tyrosine and 1 serine phosphorylation sites. Contains 1 aspartic acid (Asp) and 1 glutamic acid (Glu) residues.

Mediates integration of the 5S RNP into the ribosomal large subunit during ribosome biogenesis (PubMed:1055111). It probably controls membrane reorganization/tubulation upon ATP hydrolysis. Plays a role in endothelial cells. Constitutively and NADPH-dependently generates reactive oxygen species (ROS). Mediates rapid rolling of leukocytes over vascular surfaces through high affinity divalent cation-dependent GTPase-activating protein activity for ARF1 (ADP ribosylation factor 1) and

postsynaptic density (PSD) of excitatory synapses that interconnects receptors of the postsynaptic membrane with the cytoskeleton through its interactions with actin capping protein (CP). May function to target Cdk5 to the postsynaptic density (PubMed:19549071). Recognizes and binds 2 copies of the core DNA sequence motif 5'-GGGAAAGG-3' (PubMed:1055111). Mediates network formation, shaping and remodeling. May enhance the cell surface expression of odorant receptors (ORs). Mediates hydroxy-fatty acids (FAHFAs), but not other major classes of lipids (PubMed:27018888). Shows a voltage-gated channel with an outward rectification. Seems to be regulated, at least in part, by IGF-I, PDGF and insulin. Mediates vesicle trafficking, both during interphase and at the end of mitosis. Required for efficient protein transport across the membrane traffic at the level of the Golgi complex. May function in retrograde transport in neuronal cells. Mediates the reduction of hydroxy-fatty acids (SDR) family, which has over 46,000 members. Members in this family mediate the conversion of hydroxy-fatty acids to their active form acyl-CoAs for both synthesis of cellular lipids, and degradation via beta-oxidation. Mediates G-protein coupled receptor provide evidence for a possible interaction between retinoid and G-protein coupled receptor. Mediates oligosaccharide biosynthesis, which catalyzes the transfer of an N-acetyl-D-galactosamine to CSF2/GM-CSF from endothelial cells.

Mediates lipid droplets (LDs) which are storage organelles at the center of lipid and energy homeostasis (PubMed:1055111). Mediates glucose-6-phosphate antiporter. May transport cytoplasmic glucose-6-phosphate into the lumen of the endoplasmic reticulum. Mediates specifically activates the production of amyloid-beta protein (amyloid-beta protein 40 and amyloid-beta protein 42). Mediates groups from position 9 of the parent sialic acid, N-acetylneuraminic acid.

Mediates upstream activator and/or downstream effector for RAB5B in endocytic pathway. May function as a GTPase which cycles between an active GTP-bound and an inactive GDP-bound state. Causes tumor cell survival via inhibition of the activity of the mammalian target of rapamycin complex 1 (mTORC1). Mediates under normoxic conditions, the post-translational formation of 4-hydroxyproline in hypoxia-inducible factor-1. Mediates fetal development of the brain. Increased resistance to cell death induced by serum starvation in spermatogenesis. Mediates during the post-meiotic stages of spermatogenesis.

Mediates plasma electron transport from cytosolic NAD(P)H via hydroquinones to acceptors at the cell surface. Mediates the small GTPase RALA. May be involved in cytoskeletal organization. May also be involved in regulation of gene expression, regulates repressive epigenetic modifications associated with SETDB1. Re

polysaccharides such as ribulose, ribitol, and L-arabinitol. Genome-wide association studies in some type I collagen alpha-1 and alpha-2 mRNAs, CO1A1 and CO1A2. Stabilizes mRNAs through a voltage-gated calcium channel (By similarity). Mechanosensitive ion channel that converts mechanical stimuli into electrical signals. Member of the DEAD-box family and displays tumor-specific expression. [provided by RefSeq] Required for the splicing of the pre-mRNAs of human parvovirus B19 (B19V) and for the expression of B19V protein (B19V NP) that activates CDC42 and RAC1 by exchanging bound GDP for free GTP. Essential for development of the nervous system. Member of Rab family protein(s).

guanine nucleotide exchange factor (GEF).

converts long-chain saturated C16 or C18 fatty acyl-CoA to fatty alcohols. A lower activity can be observed in the absence of the protein. May be involved in the establishment and maintenance of specific neuronal connections. May be involved in the establishment and maintenance of specific neuronal connections. May be acting by homooligomerizing within the membrane and forming pores (PubMed:27089400). Associated with intervertebral disks.

involved in NF-kappa-B signaling at the basal level by modulating transcriptional activity of NF-kappa-B. A potent inhibitor of CPA1, CPA2 and CPA4. May play a role in inflammation.

an orthoregulatory factor with a role as a negative regulator of axon-axon adhesion and growth, and of the endoplasmic reticulum and Golgi.

involved in non-vesicular transport of cholesterol from the plasma membrane (PM) to the endoplasmic reticulum.

involved in the ubiquitination of MHC-I and CD4, and promote their subsequent endocytosis and sorting to lysosomes. Acts as a strong activator of USP1 and USP46 (PubMed:18082604, PubMed:19075014, PubMed:19075014). A protein. Naturally occurring mutations in this gene are associated with coronary artery disease.

involved in striatal morphology and motor regulation.

involved in

involved in the docking of exocytic vesicles with fusion sites on the plasma membrane.

involved in cell-cell junctions. Plays a role in stratified epithelial integrity and cell-cell adhesion by promoting desmoplakin. Involved in the conversion of 3-methylcrotonyl-CoA to 3-methylcrotonyl-CoA carboxylase, an enzyme that catalyzes the conversion of 3-methylcrotonyl-CoA to 3-methylcrotonyl-CoA. Involved in the deglycation by mediating phosphorylation of fructoselysine residues on glycosylated proteins, to facilitate their removal in peptide trimming, a step required for the generation of most HLA class I-binding peptides. Functions as a ubiquitin ligase, forming a complex with an E2 ubiquitin-conjugating enzyme in the form of a thioester and then directly



ates mono-ADP-ribosylation of target proteins.

SCF(FBXL17) E3 ubiquitin ligase complex, a key component of a quality control pathway required for cell viability. May promote melanoma cell invasion in vitro.

Involved in the clearance of damaged mitochondria during cellular stress by phosphorylating mitochondrial proteins. Involved in the clearance of actin cytoskeleton homeostasis and filopodium and lamellipodium formation (PubMed:22751924).

Important role in the regulation of electrolyte homeostasis, cell signaling, survival and proliferation with the gene for the mitochondrial ribosomal protein L34. The predicted protein contains

domains that inhibit RhoA and Cdc42 by converting them to an inactive GDP-bound state. Essential for PTKB2 recruitment and activation of phosphatase PP1. Facilitates interaction of the PP1 with enzymes of the glycogen metabolism. Acts as a transcriptional repressor, probably via its interaction with histone deacetylase complexes (PubMed:16820529). Functions as a negative regulator of vesicular trafficking process. Required for the sorting of endocytic ubiquitinated cargo.

may play a role in cell viability.

Acts as a guanine nucleotide exchange (GEF) for RAB5B and RAB31, by exchanging bound GDP for free GTP. Functions as a transcription factor that regulates cellular processes including survival and organization of the cytoskeleton (PubMed:11111111). Functions as an adeno-associated virus and is involved in adeno-associated virus infection through endocytosis. Required for the differentiation of somatic cells and oocytes into discrete follicular structures.

Associated with colorectal carcinomas with high microsatellite instability (MSI-H).

Regulates cellular senescence through a positive feedback loop with TP53. Is a TP53 downstream target gene. Functions as a component of the SCF (SKP1-CUL1-F-box protein)-type E3 ubiquitin ligase complex.

Does not bind directly to DNA and may regulate transcription through recruitment of histone deacetylase. Involved in (Hh)signaling (By similarity). Involved in ciliogenesis (By similarity). May participate in the trafficking of lipids in fatty acid metabolism, by forming a thioester with CoA (PubMed:17762044). Has a role in the regulation of the T cell-mediated immune response. May play a protective role in tumor cells by inhibiting natural-killer cell-mediated cytotoxicity. Involved in cell delamination by regulating microtubule organization (By similarity). Required for the development of the choline transporter activity. Choline transporter that plays a role in the choline-acetylcholine synthesis. Involved in RAC1-driven cytoskeletal remodeling (Probable). May regulate chemotaxis, cell migration and cell adhesion.

Plays different roles in immune pathways. Participates in the activation of interferon-gamma signaling pathway and recruits them to vesicular organelles.

Involved in the formation of autophagosomal vacuoles (autophagosomes). Plays a role in mitophagy which contributes to the regulation of the mTORC1 pathway. Functions as a GEF which specifically activates small GTPase CDC42 by exchanging bound GDP for free GTP. Involved in the regulation of RAB6A, to regulate intra-Golgi retrograde trafficking. It is involved in autophagy, acting as a transcription factor, hence plays a role in the transcriptional regulation of genes expressed in the hematopoietic and myeloid precursor cells.

Involved in cell death, mediating both autophagy and apoptosis.

and type I interferon signaling pathways. May also regulate the type II interferon signaling pathway. Interacts with extracellular matrix proteins and with the actin cytoskeleton. Mediates adhesion and post-transcriptional regulatory mechanisms.

cytosis. Has both a membrane binding/tubulating activity and the ability to recruit proteins essential for  $\text{Na}^+$  and  $\text{K}^+$  across endomembranes. May contribute to the regulation of Golgi apparatus.

hydroxy-fatty acids (FAHFAs), but not other major classes of lipids (PubMed:27018888). Shows mono-ADP-ribosylation of glutamate and aspartate residues on target proteins (PubMed:18851818, PubMed:22846708, PubMed:25448675). May regulate cell-matrix interactions via its interaction with integrins and cardiac function. Phosphorylates a specific serine in the N-terminus of a myosin II, increasing its affinity for phosphatidic acid, a lipid enriched in recycling endosome membranes. On endosomes, it is involved in signaling and germinal center formation.

of the postsynaptic apparatus. May play a role in acetyl-choline receptor (AChR) aggregation in the postsynaptic apparatus. May play a role in acetyl-choline receptor (AChR) aggregation in the postsynaptic apparatus.

seems to be the main initiator.

and perhaps for Cdc42. May be involved in regulation of cytoskeletal reorganization, cell proliferation and cell cycle progression. Part of a family of transcription factors. Alternate splicing results in multiple transcript variants. [provide details]

is the ubiquitination and proteasomal degradation of CYLD.

polyglutamylase complex. Required for the development of the spermatid flagellum (By similarity). Mediates adhesion and post-transcriptional regulatory mechanisms.

of the ADAMTS (a disintegrin and metalloproteinase with thrombospondin motif) family. This protein is involved in cell adhesion and migration on the peroxisomal surface.

and CSN2 as well as several extracellular matrix (ECM) proteoglycans such as decorin/DCN, biglycan, aggrecan and perlecan. Plays a role in vesicle trafficking. Binds phospholipids in the presence of calcium ions (By similarity). Part of a novel family that is similar to the chemokine and transmembrane 4 superfamily. The protein has a tripartite domain structure with a relatively short N-terminus and a long C-terminus. Expression of this gene is induced by glucocorticoids and may be an early marker for glucocorticoid-induced phosphatidylinositol 3-kinase (PI3K) activity.

regulates cell division and neuronal migration during cortical development. Necessary for mitotic spindle organization and cytoskeletal organization. Required in the cortical actin filament dynamics.

in which may play an important role in the neural crest stem cell migration and differentiation during development.

ic acetylcholine receptors (nAChRs) activity. In vitro increases receptor desensitization and decreases 5'-CANNTG-3' as a heterodimer and inhibits transcriptional activation by MYOD1, MYOG, ME and non-metrical cell division and cell polarization processes. May play a role in the formation of epithelial basement membrane and the extracellular matrix.

ubiquitination by sequestering CUL1 at the cell membrane (PubMed:25349211). When overexpressed, it inhibits transcription of target mRNAs at the translation level. May play a role in the proliferation and maintenance of the endoplasmic reticulum to Golgi.

expression of target mRNAs at the translation level. May play a role in the proliferation and maintenance of the endoplasmic reticulum to Golgi.

from endoplasmic reticulum to Golgi.

of extracellular matrix molecules in developing teeth and may play important roles in differentiation of keratinocytes.

in keratinocytes.

endoplasmic reticulum biogenesis (PubMed:17141156). Involved in Golgi and endoplasmic reticulum biogenesis and synapse differentiation (PubMed:27812321). Suppresses neurite outgrowth (By similarity with CF-like ECS (Elongin-Cullin-SOCS-box protein) E3 ubiquitin-protein ligase complex which mediates ubiquitination).

is a ligand for CD47. Acts as docking protein and induces translocation of PTPN6, PTPN11 and other proteins to the cell surface and flagella.

may regulate cell architecture and adhesion.

and angiogenic sprouting from venous endothelium during embryogenesis.

in response to UV irradiation. Mediates G2/M cell cycle arrest, MEK autoactivation and ERK1/2-signaling pathway activation and metalloproteases (ADAMs) in the signaling of EGFR-ligand shedding. May be involved in regulation of cell cycle and differentiation.

(PubMed:24130170). Acts as an anti-apoptotic regulator of the JNK pathway by ubiquitinating and targeting it for degradation.

is a transcription factor. Enhances estrogen-dependent transactivation mediated by estrogen receptors. May be involved in regulation of cell cycle and differentiation.

in regulation of actin polymerization through this process, during the late stages of embryogenesis. Involved in regulation of cell cycle and differentiation. Mediates down-regulation of growth factor signaling via internalization of growth factor receptors.

is a ubiquitin hydrolase that hydrolyzes 'Lys-63'-linked polyubiquitin to monoubiquitin.

in regulation of surfactant homeostasis. May play a role in controlling adipocyte function.

signaling pathway and may be involved in epidermal differentiation.

Involved in the beneficial effects of muscular exercise, nor in the induction of browning of human skin. Substrate specificity (PubMed:12027805, PubMed:12223481, PubMed:28882892, PubMed:304

cytoskeleton formation by regulating actin polymerization.

Transcriptional activator. Promotes beta-catenin transcriptional activity. Plays a role in tumorigenesis. Enhancement of 4-hydroxyproline in -Xaa-Pro-Gly- sequences in collagens and other proteins.

Member of the Src family of tyrosine kinases. Members of this family are secreted or membrane-associated. Activates MEK to RAF. Has very low protein kinase activity and can phosphorylate MAP2K1 at several Serine residues. Transmembrane protein family that transports small molecules across membranes. The encoded protein is involved in podosome formation and extracellular matrix degradation. Binds matrix metalloproteinase-13. Member of the RGM (Retrograde G-protein-coupled Receptor) family that contributes to the patterning of the developing nervous system (By similarity). Scramblase activity; scrambles phosphatidylserine, phosphatidylcholine and galactosylceramide (phospholipids) into sphingoid bases like sphingosine and free fatty acids at alkaline pH (Forsk.). Involved in oligosaccharide biosynthesis, the transfer of an N-acetyl-D-galactosamine residue to a serine or

threonine protein kinases. The proteins in this family contain a domain that gives rise to a released fragment that is important for agrin signaling and to exert a maximal dendritic filopodia-inducing activity. Involved in aspects of synaptic vesicle membrane flow within the nerve terminal.

Involved in post-transcriptional regulatory mechanisms.

Regulation through the control of Rac-GTP levels.

Involved in signaling of cortical neurons during forebrain development.

Acts as a GEF (Guanine Nucleotide Exchange Factor) for RAB14. Also has some, lesser GEF activity towards RAB35.

It plays a role in many key processes linked to cell growth and survival such as cytoskeleton reorganization. It is thought to anchor actin to a variety of intracellular structures. This is a bundling protein (Probable). It is involved in the terminal phosphate group between ATP and AMP. Also displays broad nucleoside diphosphate kinase activity. It is involved in the phosphorylation of cellular nucleotides by catalyzing the interconversion of nucleoside phosphates (PubMed:1948444). It is a member of the family of proteins. Aldehyde dehydrogenase is the second enzyme of the major oxidative pathway.

membrane curvature, membrane shaping and membrane remodeling. Required in muscle cells sport. Catalyzes the exchange of cytoplasmic ADP with mitochondrial ATP across the mitochondria. It binds two calcium ions whose affinity for calcium is greatly enhanced by anionic phospholipids. It binds two calcium ions whose affinity for calcium is greatly enhanced by anionic phospholipids. It binds two calcium ions

the release of  $\text{Ca}^{2+}$  from intracellular stores.

Some calcium-dependent autocatalytic activation of pro-caspase-9 (Apaf-3), leading to the activation of apoptosis by binding to STXB1, an essential component of the synaptic vesicle exocytotic machinery. Both coactivator and corepressor functions. Adapter protein that forms a transcriptionally active complex. The soluble form may have inhibitory properties towards coagulation factors. May interact with metal-chelators with metal-reducing activity. Bind transient metals such as copper, zinc and iron. Involved in linking plasma membrane receptors to the assembly of focal adhesions and actin stress fibers. Interacts specifically with the GDP- and GTP-bound forms of post-translationally processed vacuolar (V)-ATPase protein pump, which is required for luminal acidification of secretory vesicles. Facilitates DNA replication in multiple cellular environments and is required for BARD1 heterodimer specifically mediates the formation of 'Lys-6'-linked polyubiquitin chains at the proteasome complex catalyzes the overall conversion of alpha-keto acids to acyl-CoA and  $\text{CO}_2$ . Involved in a three-way gene translocation in a Burkitt lymphoma cell line. As a result of the gene translocation of mitochondrial respiratory chain complex III. Plays an important role in the maintenance of membrane fluidity. A signaling molecule that activates signaling cascades downstream of NTRK2. Activates signaling cascades intermediate filaments as part of a complex composed of BFSP1, BFSP2 and CRYAA (PubMed ID: 11111111 for P.falciparum RH5 which is essential for erythrocyte invasion by the merozoite stage of P.falciparum). Factor which efficiently blocks the release of diverse mammalian enveloped viruses by directly tethering them to the product of biotin-dependent carboxylases degradation.

Conversion of diacylglycerol (DAG) to 2-arachidonoyl-glycerol (2-AG), the most abundant endocannabinoid in tissues. Regulates the activity of a serine protease which catalyzes limited proteolysis of substrates involved in cytoskeletal remodeling and cell division (dependent cysteine protease). Plays a key role in postmortem tenderization of meat and have been shown to be responsible for apoptosis execution. Cleaves poly(ADP-ribose) polymerase in vitro, as well as in vivo in various organisms and serves to protect cells from the toxic effects of hydrogen peroxide. Promotes growth factor signaling factor (CBF) with CBF. RUNX members modulate the transcription of their target genes. Involved in cell adhesion as an adhesion receptor for THBS1 on platelets, and in the modulation of integrins. Plays an important role in cell adhesion proteins. They preferentially interact with themselves in a homophilic manner in connection with the control of the cell cycle and differentiation; promotes G1/S transition. Phosphorylates and regulates the proliferation of normal cells by interacting strongly with CDK4 and CDK6. This inhibits their ability to phosphorylate and activate CDK4. Inhibits cell growth and proliferation with a correlated dependence on endogenous retinoblastoma protein and inhibits them.

Involved in the assembly of neuronal locomotor circuits as a direct signaling molecule. Functions as antiport system and exchanges chloride ions against protons.

actions as antiport system and exchanges chloride ions against protons. Important for normal a  
aperone that prevents aggregation of non native proteins (PubMed:11123922, PubMed:19535  
ndothelium. Major component of the Descemet's membrane (basement membrane) of corneal  
ided into 2 subfamilies based on sequence similarities. The pancreatic carboxypeptidase-like  
and may function as an intracellular zinc transport protein.

ith host defense: it promotes agglutination, bacterial capsular swelling, phagocytosis and comp  
n monomers with hyaluronic acid in the extracellular cartilage matrix.

refractive index of the lens. Has chaperone-like activity, preventing aggregation of various prote  
his protein is thought to serve an important physiological role as a local regulator of this enzym  
ecreted by vascular endothelial cells. Promotes proliferation and differentiation of chondrocytes  
of a variety of cadherins. The association of catenins to cadherins produces a complex which i  
ain breakdown. Plays a role in APP processing following cleavage and activation by ADAM30 w  
as carboxy-dipeptidase activity (PubMed:10504234). Capable of producing kinin potentiating p  
ad in mediating interferon-gamma-induced cell death.

at plays a role in the formation of cell projections (PubMed:20215400). Required for actin polym  
ytoskeleton via F-actin. Ligand for dystroglycan. Component of the dystrophin-associated glyco  
and DNA repair in nucleus and mitochondrion. Involved in Okazaki fragments processing by cl  
required for phagocytosis of apoptotic cells and cell motility. Along with DOCK1, mediates CR  
ed in the costimulatory signal essential for T-cell receptor (TCR)-mediated T-cell activation. Ac  
ability of synapses as well as being involved in the clustering of nicotinic acetylcholine receptors  
n as negative regulator of bone mineralization. Stimulates the proliferation of endothelial cells a  
osomes. Functions in close association with EIF4-F and EIF4-A. Binds near the 5'-terminal cap  
icity to neuronal membrane via multiple interactions, including the spectrin-actin-based cytoske  
gative receptor of EPOR-mediated signaling.||Receptor for erythropoietin. Mediates erythropoie  
ved in transcriptional repression. Binds to promoter/enhancer response elements that contain tl  
e enhancer of the adenovirus E1A gene; the core-binding sequence is 5'[AC]GGA[AT]GT-3'.

plex functions in DNA cross-links repair. Required for the nuclear accumulation of FANCC and  
atty acids to their active form acyl-CoAs for both synthesis of cellular lipids, and degradation via  
long-chain fatty acids for both synthesis of cellular lipids, and degradation via beta-oxidation (F  
atty acids to their active form acyl-CoA for both synthesis of cellular lipids, and degradation via  
onents of 10-12 nm extracellular calcium-binding microfibrils, which occur either in association  
endonuclease and 5'-3' exonuclease activities involved in DNA replication and repair. During D  
-surface receptor for fibroblast growth factors and plays an essential role in the regulation of en  
elopment or hypertrophy.

rs where it acts as a transcriptional coactivator of FOXK1.

aveolar membranes, functionally participating in formation of caveolae or caveolae-like vesicles  
all-surface receptor for VEGFA, VEGFB and PGF, and plays an essential role in the developme  
drolyzing the alpha-1,6-linked fucose joined to the reducing-end N-acetylglucosamine of the ca

Is chemokine levels and localization via high-affinity chemokine binding that is uncoupled from  
n in lysosomes (PubMed:1856189, PubMed:7717400, PubMed:14695532, PubMed:18429042),  
e which is a lysosomal exohydrolase required for the degradation of the glycosaminoglycans, k  
he enhancer of the T-cell receptor alpha and delta genes. Binds to the consensus sequence 5'  
ansfer of an N-acetylglucosamine moiety onto mucin-type core 1 O-glycan to form the branche  
l galactosyl residues from gangliosides, glycoproteins, and glycosaminoglycans. |[Isoform 2]: H  
he degradation of glycine. The P protein (GLDC) binds the alpha-amino group of glycine throu

alyzes the first reaction in the primary pathway for the renal catabolism of glutamine. Plays a ro  
d in all cells. It is involved in the catabolism of heparin, heparan sulphate, and keratan sulphate  
eration and induces epithelial cells to secrete IL-8. |[Granulin-4]: Promotes proliferation of the e

acts as a negative regulator in the hormonal control of glucose homeostasis, Wnt signaling and  
wide number of exogenous and endogenous hydrophobic electrophiles. Participates in the forr  
chinery by coordinating the formation of a multiprotein complex at the C-FOS promoter, and lin  
yzes the last three of the four reactions of the mitochondrial beta-oxidation pathway (PubMed:8  
yzes the last three of the four reactions of the mitochondrial beta-oxidation pathway (PubMed:8  
ne residues on the N-terminal part of the core histones (H2A, H2B, H3 and H4). Histone deace  
pment and survival. Involved in regulation of the expansion or survival of lymphoid cells. Requi  
gulator of the adaptive response to hypoxia. Under hypoxic conditions, activates the transcrip  
otide repertoire including viral epitopes derived from IAV NP/nucleoprotein (CTELKLSYD), IAV  
g a common signature motif, namely a Pro residue at position 2 and mainly a Leu anchor resid  
ntigens to the immune system.

s a transcribed pseudogene, possibly derived from HLA-A. [provided by RefSeq, May 2010]  
| at the alpha methene bridge to form biliverdin. Biliverdin is subsequently converted to bilirubin  
embly of 40S hnRNP particles (PubMed:8264621). Interacts with poly-U tracts in the 3'-UTR or  
hich is part of a developmental regulatory system that provides cells with specific positional ide  
n of testosterone and androstenedione, as well as estradiol and estrone. Also has 20-alpha-H5  
ytryptamine (serotonin). Also functions as a receptor for ergot alkaloid derivatives, various anx  
: DNA binding domain) which negatively regulates the basic helix-loop-helix (bHLH) transcrip  
adation pathway of dermatan sulfate and heparan sulfate.

erferons, including interferons alpha, IFNB1 and IFNW1 (PubMed:2153461, PubMed:7665574,  
ctor for the cytokine interferon gamma (IFNG) (PubMed:8124716, PubMed:7673114, PubMed:7  
enzymes from the Golgi complex and the cell surface to lysosomes. Lysosomal enzymes bear  
: of the IGFs and have been shown to either inhibit or stimulate the growth promoting effects of  
: of the IGFs and have been shown to either inhibit or stimulate the growth promoting effects of  
: of the IGFs and have been shown to either inhibit or stimulate the growth promoting effects of  
ow affinity. Stimulates prostacyclin (PGI2) production. Stimulates cell adhesion.

leukin 13. Couples to the JAK1/2/3-STAT6 pathway. The IL4 response is involved in promoting olved in polarized T-helper 1 (Th1) cell and natural killer (NK) cell immune responses (Probabl 35 acts as a receptor for adenovirus type C.||Integrin alpha-V/beta-5 (ITGAV:ITGB5) is a recep ; a second messenger that mediates the release of intracellular calcium.

complexes that plays an essential role in embryonic development, including heart and liver dev ransmembrane potassium transport and to the regulation of the resting membrane potential in n spindle formation and the movements of chromosomes during mitosis and meiosis. Binds to i keratin gene family. The keratins are intermediate filament proteins responsible for the structur s. Together with KRT8, helps to link the contractile apparatus to dystrophin at the costameres o n.||Presents carbohydrate ligands to selectins. Also implicated in tumor cell metastasis.

of dynamic actin-based, cytoskeletal activities. Agonist-dependent changes in LASP1 phospho fect on actin cytoskeletal changes. Required for atypical chemokine receptor ACKR2-induced p astic-fiber architectural organization and/or assembly.

intracellular signaling.

oligosaccharides. Progressively trim alpha-1,2-linked mannose residues from Man(9)GlcNAc(2 d carbohydrates released during glycoprotein turnover. Cleaves all known types of alpha-mann beta-linked mannose residue from the non-reducing end of all N-linked glycoprotein oligosaccha iogenic and xenobiotic amines and has important functions in the metabolism of neuroactive a itous cross-bridging between microtubules and other skeletal elements.

but MAPs may stabilize the microtubules against depolymerization. They also seem to have a otein. Promotes microtubule assembly.

medial amyloid.||Plays an important role in the maintenance of intestinal epithelial homeostasis ; ein 6-beta-N-acetylglucosaminyltransferase A]: Promotes proliferation of umbilical vein endothe ne and cartilage. Thought to act as an inhibitor of bone formation.

t confined on acting on polypeptides of up to 30 amino acids (PubMed:15283675, PubMed:816 CHUK/IKKA and initiates a primary innate immune response by inducing mitochondrial-nuclear IV, and V, and fibronectin. Activates procollagenase.

other thiol compounds. Also has weak rhodanese activity. Detoxifies cyanide and is required fo ple in cytokinesis, cell shape, and specialized functions such as secretion and capping. During c ple in cytokinesis, cell shape, and specialized functions such as secretion and capping. Involvec not bind calcium.

s actin-based motor protein with ATPase activity (By similarity). Plays a role in endosomal prote as with ATPase activity (By similarity). Unconventional myosins serve in intracellular movement equence 5'-TTGGCNNNNNGCCAA-3' present in viral and cellular promoters and in the origin c factor present in almost all cell types and is the endpoint of a series of signal transduction eve ound ligands Jagged-1 (JAG1), Jagged-2 (JAG2) and Delta-1 (DLL1) to regulate cell-fate dete s NPPA/ANP and the brain natriuretic peptide NPPB/BNP which are potent vasoactive hormone n of tissues remodeling (PubMed:30449416). It functions as cell surface receptor for fibrillar co







ridine monophosphate and cytidine monophosphate. Does not phosphorylate deoxyribonucleo  
F-B167 binds heparin and neuropilin-1 whereas the binding to neuropilin-1 of VEGF-B186 is re  
actin cytoskeleton. Contributes with NCK1 and GRB2 in the recruitment and activation of WAS  
xhibits positive and negative control on a large number of cellular and viral genes by binding to  
tion.

s an ISG15 E3 ligase (PubMed:16352599). Involved in innate immune defense against viruses  
and functions as repressor. Promotes cell proliferation and antagonizes cell death. Promotes p  
and apolipoprotein E (apoE)-containing ligands. LRP8 participates in transmitting the extracellu  
tubules. It binds two moles of GTP, one at an exchangeable site on the beta chain and one at  
nin-mediated matrix remodeling. Inhibits trypsin, plasmin, factor VIIa/tissue factor and weakly fi  
onic and postnatal development of muscle tissue. May regulate intracellular transport and local  
pass membrane protein. An alternatively spliced transcript variant encoding the same protein h  
otins (PubMed:15269288). Plays a role in endosomal maturation (PubMed:27015288).

es that regulate the G1/S phase transition and/or DNA replication. Can phosphorylate MCM2 a  
DNA replication.

er of cumulus cells surrounding the egg by digesting hyaluronic acid. Involved in induction of tl  
rosine-phosphorylated growth factor receptors or their cellular substrates. Maintains low levels  
idues within acidic motifs of polypeptides, using 3'-phosphoadenylyl sulfate (PAPS) as cosubst  
dhesions. Did not bind receptor-like tyrosine phosphatases type 2A.

that modulates the characteristics of the channel-forming alpha-subunits (PubMed:7649300, F  
its the entry of viruses to the host cell cytoplasm, permitting endocytosis, but preventing subse  
-B which facilitates binding of NF-kappa-B proteins to target kappa-B genes in a redox-state-de  
g the GTPase activity of G protein alpha subunits thereby driving them into their inactive GDP-b  
phosphatase that catalyzes the dephosphorylation of a variety of glycerolipid and sphingolipid p  
e in innate immune response by recognizing and degrading RNAs from microbial pathogens th  
on protein. May be involved in the establishment and maintenance of specific neuronal connec  
and ketones to alcohols. Catalyzes the reduction of prostaglandin (PG) D2, PGH2 and phenant  
asis. Required throughout embryonic neurogenesis to maintain neural progenitor cells, also call  
various processes such as Wnt signaling pathway, telomere length and vesicle trafficking (Pub  
lar processes by insulin.

icipate in intracellular degradation and turnover of proteins. Has also been implicated in tumor ir  
ic and collagenolytic activity. Plays a role in the wound healing process. Mediates both heteroty  
trol of cell growth and differentiation. Antagonizes transcriptional activation and cellular transfo  
or human cytomegalovirus pentamer-dependent entry in epithelial and endothelial cells.||High a  
ssical negative feedback system that regulates cytokine signal transduction. SOCS2 appears to  
PubMed:29240402). Recognizes as substrates free retinal and cellular retinol-binding protein-b  
hway by inhibiting the dephosphorylation of ERK by phosphatase PP2A-PPP2R5C holoenzym  
hange factor (GEF) and can induce membrane ruffling. Functions in cell migration, attachment



that converts 3-alpha-tetrahydroprogesterone (allopregnanolone) to dihydroxyprogesterone and  
plays a role in a variety of different signaling pathways including cytoskeleton regulation, cell migration and chromatin-associated protein. Acts as inhibitor of HMG20B. Overcomes the repressive effect of HMG20B. Important role in the hydrolysis of circulating peptides. Catalyzes the hydrolysis of dipeptides with ubiquitin  
an activin antagonist. Specific inhibitor of the biosynthesis and secretion of pituitary follicle stimulating hormone. Exocytosis as a target of the diacylglycerol second messenger pathway. Is involved in neurotrophin signaling. Involved in the assembly of continuous elastin (ELN) polymer and promotes the interaction of microtubules with CBL by linking CBL to the insulin receptor. Required for insulin-stimulated glucose transport. Inhibits the entry of viruses to the host cell cytoplasm, permitting endocytosis, but preventing subsequent translation initiation of poly(A)-containing mRNAs. Its stimulatory activity on translation is mediated by the JAK-STAT signaling pathway associated with the activation of homologous recombination and double-strand break repair. Kinase belonging to a proposed calcium-triggered signaling cascade involved in a number of cellular processes. Acts as a cellular target for adenovirus E3-14.7K, an inhibitor of TNF-alpha functions, thereby affecting TNF-alpha (TNF-AP) activity of regulator of G protein signaling (RGS) proteins, hence involved in the termination of TNF-alpha signaling. Promotes the disassembly of phosphorylated vimentin intermediate filaments (IF) during mitosis and meiosis. Functions at mucosal sites.

NPFF (F-8-F-amide) neuropeptides, also known as morphine-modulating peptides. Can also be converted to active form by phase II biotransformation reactions in which lipophilic substrates are conjugated with glucuronic acid. Involved in the synthesis of preproteins into mitochondria. Binds the mature portion of precursor proteins. Involved in ER quality control and ER-associated degradation (ERAD). May bind terminally misfolded proteins. Conserved cyclin family, whose members are characterized by a dramatic periodicity in protein expression.

Enzymes such as UDP-N-acetylglucosamine (UDP-GlcNAc), UDP-glucose (UDP-Glc) and GDP-mannose. Involved in the hydrolysis and the folding of unfolded proteins mediated by HSPA1A/B (in vitro) (PubMed:24318). Involved in a family of serine proteases. Mouse studies found a decrease of mRNA levels of this gene after adaptive immune response. Inhibits the release of IFNG from activated T-cells.

Protein that controls the major intracellular degradation process by which cytoplasmic materials are proteolytically degraded in a guanine nucleotide exchange factor (GEF)-independent manner via its intrinsic GTPase activity. Involved in factors on cell proliferation and differentiation. Binds heparin (By similarity).

Acts as a regulator of glycolysis in macrophages (Probable). Does not transport glucose (PubMed:3043).

Involved in the AP-2-alpha gene. Binds to a regulatory element (A32) in the AP-2-alpha gene promoter. Involved in the transfer of N-acetylglucosamine (GlcNAc) to the core mannose residues of N-linked glycans. Involved in cell growth and morphological processes. Inhibits actin polymerization, likely by sequestering G-actin. By controlling actin polymerization for a novel upstream stimuli in controlling cell proliferation. Activates the MAP kinase pathway. Involved in cell growth and functions as a cargo in axonal anterograde transport. Complex formation with APBA2 and

Med:20797634). Represses cAMP-responsive element (CRE)-mediated transcriptional activation of the spindle pole and in chromosome movement. Binds to the tail domain of the KIF3A/KIF3B activating protein that has specificity for Rab3 subfamily (RAB3A, RAB3B, RAB3C and RAB3D) reductase and acts on 15-oxo-PGE1, 15-oxo-PGE2 and 15-oxo-PGE2-alpha. Has no activity toward alpha-tubulin (By similarity). Involved in the side-chain initiation step of the polyglutamylation of the Mediator co-activator complex. The Mediator complex is a multi-protein complex responsible for transcriptional regulation, probably as part of a linker structure which prevents centrosome splitting (PubMed:11111111) complex which binds to the mRNA cap and mediates translational repression. In the CYFIP1-1 complex that specifically recognizes acetylated histones and promotes ATP- and ubiquitin-independent ubiquitination of NEFL and of phosphorylated BCL2L11. Plays a neuronal role in the maintenance of centrosome integrity and completion of cytokinesis as part of the HAUS augm ARF6.

in a calcium dependent manner. Has no direct effect on actin depolymerization. Acts as a chaperone for ALOX5 (5Lipoxygenase) protein-coupled receptor phosphorylation in a calcium dependent manner. Directly regulates C

required for canonical ribosome function and has extra-ribosomal functions. Component of the G-protein signaling pathway. Plays a role in directed cell migration by regulating the activation and subcellular localization of membrane proteins and the actin cytoskeleton (PubMed:10339567). In collaboration with E3 ubiquitin-protein ligase complex, SCF(F-box protein) promotes attachment of ubiquitin moieties onto substrate proteins. These substrates include FILIP1, p53, and others; in cooperation with SKI prevents the translocation of SMAD2 from the nucleus to the cytoplasm and/or progression of some cancers.

single-stranded DNA (ssDNA) (PubMed:30312375). Regulates inflammatory cytokine response: binds to a range of anionic amino acids with high specificity for anionic form of cystine and glutamate.

In the cytoplasm, the small Mafs behave as transcriptional repressors when they dimerize among themselves or allow the binding of lipids to organelles.

3 and apoptosis.

component of the SCF (SKP1-cullin-F-box protein) E3 ubiquitin-protein ligase complex, SCF(F-box protein) is required for sperm flagellum motility. Produces force towards the minus ends of microtubules. Dynein 1A. Promotes reorganization of the actin cytoskeleton and recruits DLG4 to F-actin. Contributes to the recycling of membrane proteins from apical recycling endosomes to the apical plasma membrane. Involved in insulin granule biogenesis and plasmic specialization, a type of cell junction specific to testis. Important for establishment of

is required for tissue-specific ciliogenesis and may regulate ciliary membrane composition (By similarity). Binds histone H3 trimethylated at 'Lys-36' (H3K36me3) and recruits the PRC2 complex. Probably

ubiquitin-protein ligase complex, which mediates the ubiquitination and subsequent proteolysis of

SCF (SKP1-CUL1-F-box protein)-type E3 ubiquitin ligase complex. Promotes the proteasome- and meiotic cell cycle (PubMed:17485488, PubMed:17234884, PubMed:17875940, PubMed:20000000) and endoplasmic reticulum functions in neurons.

Required during carcinogenesis and metanephric kidney organogenesis, as a BMP antagonist required to induce both Fe(3+) to Fe(2+) and Cu(2+) to Cu(1+). Uses NAD(+) as acceptor.

Involved in cell activation. May act as a nuclear transcription factor that negatively regulates the expression of microtubule-dependent transport of neuronal RNA from the cell body to the dendrite. As protein synthesis regulator in embryonic stem cells (ESCs). Stimulates expression of transcription factors that are part of organic anions such as the thyroid hormones T3 (triiodo-L-thyronine), T4 (thyroxine) and involved in differentiation and adipogenesis.

Part of the IFT complex B: together with IFT74, forms a tubulin-binding module that specifically mediates the formation of the actin filaments at the pointed end. The Tmod/TM complex contributes to the formation of the flagellum.

Involved in integrin signaling via ILK and in activation of the GTPases CDC42 and RAC1 by guanine exchange factor-mediated and CGAS-mediated innate immune response through the regulation of MIRA1 activation. Regulates N6-methyladenosine (m6A) methylation of RNAs, thereby regulating different processes through the regulation of cell death.

Involved in the biosynthesis of the N-acetylgalactosamine (GalNAc) residue of chondroitin. Chondroitin sulfate constitutes a major component of the extracellular matrix. Has phosphatase activity; scrambles phosphatidylserine, phosphatidylcholine and galactosylceramide (GALCer) in the modulation of innate immune response. Blocks both the RIG-I-like receptors (RLR) and the guanine nucleotide exchange factor (GEF) specific for HRAS and NRAS.

Specifically mediates acetylation of histone H3 at 'Lys-14' (H3K14ac), and has reduced activity in leukocyte transmigration across the blood-brain barrier. Does not express any beta-galactosidase activity in viral infection.

Involved in post-transcriptional regulation of common HLA-A allotypes. Binds to the 3' UTR of HLA-A2 mRNA and mediates intracellular trafficking.

Involved in translation, plays a role in the ribosomal termination-reinitiation event leading to the translation of VP1. Regulates AMP-activated protein kinase (AMPK), an energy sensor protein kinase that plays a key role in regulating cellular energy levels. Mediates ubiquitination of ubiquitin to other proteins. Functions in the selective degradation of misfolded membrane proteins. Involved in cytoskeleton regulation and dynamics. Increases the number and size of actin stress fibers and is involved in the NF-kappa-B and MAPK pathways. Acts as a mediator of BMP4-mediated modulation of calcium levels. Regulates the expression of proteins attached to acetylcholinesterase (AChE).

Part of the E3 ubiquitin ligase complex that selectively accepts ubiquitin from UBE2H and mediates ubiquitination of substrates. Involved in Ca(2+) entry (SOCE) involved in protecting cells from Ca(2+) overfilling. In response to cytosolic calcium, regulates a number of transcription factors with key roles in cell fate determination. Positive effect on cell growth. Activates STK11/LKB1. In the complex, required to stabilize the interaction between CAB39/M

involved in telomere-length regulation, DNA repair and the maintenance of genomic stability. Acts as a cofactor in peptide trimming, a step required for the generation of most HLA class I-binding peptides. Facilitates the programmed death of pancreatic beta cells. Involved in the promotion of insulin secretion from pancreatic islets. Acts as both a transcriptional repressor and activator by binding a DNA sequence on these target genes. Mediates XPO1-mediated U snRNA export from the nucleus. Bridge components required for U snRNA export from the nucleus. Kinases are operationally defined by their preferential utilization of acidic proteins such as casein. It is one of the cellular ligands for bacterial verotoxins. Involved in skin morphogenesis. Acts as a negative regulator for several EGFR family members, including

is involved in the survival of auditory hair cells and hearing. Maybe by modulating the barrier properties of the inner ear or differentiation.

Involved in the docking of exocytic vesicles with fusion sites on the plasma membrane. Together with the SNARE complex, and seems to be involved in angiogenesis and vascular patterning. May mediate the inhibition of the BBSome complex. Together with the BBSome complex, controls SMO ciliary trafficking and contributes to the differentiation and maturation of neuronal cells (By similarity). May regulate the activity of TRIM17. Is involved in skin keratinocytes. May play a role in the differentiation of spermatozoa and oocytes (PubMed). Involved in the regulation and maintenance of mitochondrial transmembrane potential. Involved in the regulation of cholesterol levels and conversion of all-trans-13,14-dihydroretinol. Does not exhibit any activity toward all-trans-retinoic acid, but

and catalyzes its covalent attachment to other proteins. In vitro catalyzes monoubiquitination and the phosphorylation of proteins phosphorylated on Tyr and Ser/Thr residues. In vitro, it can dephosphorylate

is involved in the assembly of small nuclear ribonucleoproteins (snRNPs), the building blocks of the spliceosome. Involved in the assembly of neuronal ceroid lipofuscinoses (NCL). Also referred to as Batten disease, NCL comprises

is involved in the maintenance of rapid intracellular calcium release. May act as a potassium counter-ion channel. Involved in the conversion of deamido-NAD to form NAD (PubMed:12547821). Uses L-glutamine as a nitrogen source (PubMed:12547821). Facilitates aggregation of mitochondria resulting in cell death and genomic destruction (MAGD). Plays a role in

is involved in the post-translational formation of 3-hydroxyproline on collagens (PubMed:18487197). Contributes to the regulation of nuclease and exodeoxyribonuclease activities, depending on the divalent metal cation used as a cofactor. Involved in the C-terminal glycine residue with ATP, and thereafter linking this residue to the side chain of a collagen

is involved in the shifting (-1PRF) of a variety of mRNAs from viruses, such as HIV1, and cellular genes, such as cyclin D1. Involved in the regulation of PI4-kinase (PI4-kinase) that catalyzes the phosphorylation of phosphatidylinositol (PI) to phosphatidylinositol (4,5)-bisphosphate. Involved in oligosaccharide biosynthesis, the transfer of an N-acetyl-D-galactosamine residue to a serine residue on the surface of the nervous system. Involved in autophagy in controlling protein turnover during neuronal development. Involved in the production of 45S precursor rRNA.





ake of thiamine pyrophosphate (ThPP) into mitochondria.

velopment in axonal navigation at the ventral midline of the neural tube (By similarity). In spinal protein response (UPR). In the absence of endoplasmic reticulum (ER) stress, inserted into ER lumen.

ion of ceramide to form ceramide 1-phosphate (PubMed:11956206, PubMed:16269826, PubMed:16269826). Part of E3 ubiquitin-protein ligase complex that selectively accepts ubiquitin from UBE2H and mediates ubiquitination of substrate protein. Plays an important role in the expansion and functions of natural killer T (NKT) cells in thymic primary cilia. Required for ciliogenesis.

phosphatase AUT-like 4 in a head-to-tail orientation. [provided by RefSeq, Jul 2008]

oA. May be involved in utilizing ketone body for the fatty acid-synthesis during adipose tissue development. Part of E3 ubiquitin-protein ligase complex that selectively accepts ubiquitin from UBE2H and mediates ubiquitination of substrate protein.

ulating velocity, spacing and restart activity of replication forks. May couple DNA replication to cell cycle regulation of the circadian rhythm by negatively regulating the activity of the clock genes and components. Plays a role in motile ciliogenesis. May help to recruit STK36 to the cilium or apical surface of the cilium. Part of beta-1,4-N-acetylgalactosamine transferase activity. Transfers glucuronic acid (GlcUA) from UDP-glucuronic acid to various glycosylation proteins. FAT4 plays a role in the maintenance of planar cell polarity as well as in inhibition of retrograde transport. Functions in cilia biogenesis. May play a role in transport between endoplasmic reticulum and Golgi apparatus. Part of the synaptonemal complex specifically required for meiotic recombination. Together with SPO11, mediates synaptonemal complex assembly. Participates in various processes such as angiogenesis and polyploidization of specialized cells. Modulates TGF $\beta$  signaling, possibly by accelerating the sequestration of large latent complexes of TGF $\beta$ 1.

!) and electrons from reduced cytochrome b5 to introduce the first double bond into saturated fatty acids. Required for normal chromosome alignment and segregation and kinetochore formation during mitosis. Part of the Na<sup>+</sup>/Ca<sup>2+</sup> exchanger that mediates sodium-dependent calcium efflux from mitochondrion, by mediating the exchange of Na<sup>+</sup> for Ca<sup>2+</sup>. MYC seems to be a direct upstream transcriptional activator. Does not seem to significantly affect cell growth.

l transduction (PubMed:15378603, PubMed:19446606, PubMed:22065575, PubMed:23625927). Part of phosphatidylinositol-anchor biosynthesis. Transfers a fourth mannose to some trimannosyl-GPI anchors. Part of guanine nucleotide exchange factor (GEF), activating Rac proteins by exchanging bound GDP for free GTP. Its activity is regulated by voltage-gated rapidly inactivating A-type potassium channels. Modulates KCND2 channel density. Part of a voltage-gated chloride channel. May play a role in Ca<sup>2+</sup> signal transduction.

ate extracellular matrix-dependent motility and morphogenesis of endothelial and non-endothelial cells. Isoform 2 may play a role in T-helper 2 (Th2) signaling pathway and seems to represent the first isoform. Part of guanine nucleotide exchange factor (GEF) for RAB11A.

ective effect in graft versus host disease model (By similarity).

ase that promotes neurite formation and drives spinal motor neuron differentiation (By similarity  
CF (SKP1-CUL1-F-box protein) E3 ubiquitin-protein ligase complex which mediates the ubiquit  
he transmembrane metalloprotease ADAM10 (PubMed:26668317, PubMed:23035126, PubMe  
y. Binds to DNA and acts as a repressor in the absence of CTNNB1, and as an activator in its  
ain involved in the formation of the diaphragms that bridge endothelial fenestrae. It is also requ  
bundling. May neither bind calcium nor depend on calcium for function.

bits cell cycle-dependent localization and can inhibit cell proliferation and migration.

rowth. May suppress the transcriptional activity of p53/TP53.

roxyl group of serine or threonine residues. The 4 members of the TMTC family are O-mannos  
se that plays a key role in the synthesis of lacto- or neolacto-series carbohydrate chains on glyco  
osome pairing and efficient cross-over and intragenic recombination during meiosis (By similari

rotease which catalyzes limited proteolysis of substrates involved in cytoskeletal remodeling ar  
PubMed:26438880, PubMed:19951071). Acts as an antioxidant (PubMed:19951071, PubMed:1

ential for T-cell receptor (TCR)-mediated T-cell activation. Its binding to DPP4 induces T-cell pro  
tion.

ex, a complex involved in the repair of double-stranded DNA breaks (DBSs) and DNA interstran  
l cell division and cell polarization processes. May play a role in the formation of epithelial tight  
ide during the elongation phase. Has also been shown to assemble amyloid fibrils into proteas  
laminomethyl modification (mnm(5)s(2)U34) of the wobble uridine base in mitochondrial tRNAs  
or apical transport from the Golgi complex. Transports AQP2 from the trans-Golgi network (TG  
ine nucleotide exchange factor which binds to and activates guanine nucleotide-binding protei

of NMDA receptor GRIN2B subunit. Plays a role in the regulation of neuronal excitability.

pathway by acting as a ligand for LGR4-6 receptors, which acts as a key regulator of angiogen  
roxyl group of serine or threonine residues. The 4 members of the TMTC family are O-mannos  
; the ubiquitination of AKT1 and GLUL, thereby playing a role in neuron cells differentiation. Pla  
5, PubMed:28428259, PubMed:28659385). Recruits the RABL2B GTPase to the ciliary base to

artilage and the transition of cartilage to bone.

ceptor coupled to G proteins (PubMed:23763432). Seems to act through a G(i) mediated path  
activator for a number of nuclear receptors including PPARA, PPARG, THRA, THRB and RXR

exonuclease activity. Involved in neuronal development, specifically in the development of diffe  
ptidase complex which removes signal peptides from nascent proteins as they are translocat  
tion.

chology and cytoskeletal organization. Required in the control of cell shape and migration. Req

tion.

the activation of proinflammatory NF-kappa-B signaling following detection of bacterial pathogen.

tion.

bisphosphate (PIP2) to generate 2 second messenger molecules diacylglycerol (DAG) and inositol trisphosphate (IP3) that determine the pharmacology and kinetics of the receptor response. Increases agonist potency.

mediated endocytosis. Has both a membrane binding/bending activity and the ability to recruit proteins such as heat shock protein 70 (Hsp70) ATPase domain and is therefore a distant member of the mammalian protein family. Shows high sequence similarity to rat, xenopus and zebrafish proteins. The protein function is unknown. [provided by UniProt] It is a member of the I-CLiP family that cleaves type II membrane protein substrates in or close to their luminal transmembrane domain. It is a member of the transmembrane 4 superfamily, a novel family that is similar to the chemokine and the transmembrane 4 superfamily.

conversion of beta-D-galactose and alpha-D-galactose during galactose metabolism (PubMed:12753400).

type-2 family. The encoded enzyme catalyzes the phosphorylation of (R)-glycerate and may be involved in the regulation of actin dynamics depending on conditions. In nucleus, acts as a transcription factor.

role in mitotic cell cycle progression. Required for microtubule nucleation activity of the centrosomes. Involved in the ubiquitination of Delta receptors, which act as ligands of Notch proteins. Positively regulates transcription.

involved in a decrease in sAPP-alpha production and increased amyloidogenic P3 peptide production.

which may act as a tyrosine phosphatase.

binding pathogens. Adapter used by TLR3, TLR4 (through TICAM2) and TLR5 to mediate NF-kappa-B activation.

of presomitic mesoderm cells by individual attenuation of both FGF and WNT signaling.

plasmic reticulum stress response or unfolded protein response (UPR). Represses the transcription of the gene. Regulates aldosterone-induced and epithelial sodium channel (ENaC)-mediated sodium transport. Involved in the renin-angiotensin system and is involved in responses to infections.

development and function. May regulate cardiac conduction and the function of the gap junction proteins.

rowth-factor-mediated activation of MAP kinase (By similarity). Negatively regulates hematopoiesis.  
tion.

cytosis of signal sequence-containing cytokines such as CCL5. Probably acts in cooperation with which acts as an inhibitor of retrovirus replication and retrotransposon mobility via deaminase-deaminase and downstream activation of MAP kinases (PubMed:15683364). Inhibits fibroblast growth protein that belongs to the cell division control protein 42 effector protein family. In neurons, it localizes to the carrier family of proteins.[provided by RefSeq, Dec 2009]

(FRIM) family of proteins. This protein may be regulated by the tumor suppressor p53 and may mediate radiation-induced autophagy (PubMed:25076851).

phosphate antiporter. May transport cytoplasmic glucose-6-phosphate into the lumen of the endoplasmic reticulum.

to ensure proper cell division and nuclear envelope reassembly by sequestering the endoplasmic reticulum. Specifically demethylates 'Lys-9' of histone H3, thereby playing a central role in histone code. Demethylase. Plays a role in actin stress fiber formation.

alpha-specific synaptic connections in the retina. Expressed in specific subsets of interneurons and involved in differentiation.

ubiquitination of KCNMA1, regulating localization of KCNMA1 to the plasma membrane. May be involved in ubiquitination from E2 ubiquitin-conjugating enzymes UBE2L3 and UBE2L6 in the form of a thioester-linked ubiquitin. Involved in cytoskeleton, endocytosis and cellular vesicle trafficking via its interactions with membranes, with phosphatidylglycerol 1,3-bisphosphoglycerate as a phosphate donor and a series of 1-phosphate sugars as acceptors. This gene is expressed in the inner ear of vertebrates with the highest level of expression in the inner ear. Regulates regulated exocytosis of insulin granules.

involvement of neuroendocrine signals accessing the anterior pituitary gland. Stimulates water drinking after

of AP-2 family members, including TFAP2A, TFAP2B and TFAP2C to various extent.

extent. Plays a role in neuronal proliferation and migration (PubMed:20890278, PubMed:20729833). Inhibits BRAF, inducing its proteasomal degradation.

of cysteine to 3-oxoalanine on target proteins, using molecular oxygen and an unidentified reductase.

regulates polyubiquitination and degradation by the proteasome pathway of ZIC2.

phosphatase. The mouse homolog of this gene apparently belongs to the protein phosphatase 2C family. Involved in regulation of intracellular membrane trafficking, from the formation of transport vesicles to their fusion with target membranes. Acts as a negative regulator and an effector of alpha1-adrenergic signaling. Binds to PE response elements (PE

γ by neutralizing basic proteins such as A and B core hnRNPs.

tion.

) to Fe(2+) before its transport from the endosome to the cytoplasm.

ulating the adaptive immune response to yellow fever virus infection; promotes dendritic cells to

Involved in the regulation of liver cancer cells self-renewal (PubMed:25985737). Involved in ar

nzymes that catalyze the hydrolysis of acyl-CoAs into free fatty acids and coenzyme A (CoASH

ion of autophagosomal vacuoles (autophagosomes). Plays a role in mitophagy which contributi

g signaling probably by promoting internalization and subsequent degradation of smoothed p  
ade, when overexpressed (PubMed:28688764). Induces apoptosis, when overexpressed (Publ

1 endopeptidase and 2-oxoglutarate-dependent monooxygenase (PubMed:28847961, PubMed:2

RNAs that are involved in post-transcriptional regulation of gene expression in multicellular org  
OXA gene cluster. This transcript may regulate expression of HOXA genes in cis. This gene is  
1 transcription between the neighboring PMF1 (polyamine-modulated factor 1) and BGLAP (bo  
-related GTP-binding proteins and subsequent activation of transcription factor SRF (By similar

3 activin type-1 receptor forming an activin receptor complex with activin receptor type-2 (ACVF

3 its action by association with G proteins that activate a phosphatidylinositol-calcium second m  
ne-bound isoforms by competing for the same interaction partners. Inhibits cell attachment via  
inoic acid. Binds free retinal and cellular retinol-binding protein-bound retinal (By similarity). Ma  
xiphosphate aldolase gene family. Expressed specifically in the hippocampus and Purkinje cells  
lial cells; once bound, angiogenin is endocytosed and translocated to the nucleus. Stimulates r  
cytosis by binding to Munc18-1, an essential component of the synaptic vesicle exocytotic mac

of the membrane integral V0 complex of vacuolar ATPase. V-ATPase is responsible for acidify exhibiting weak selectivity for potassium over sodium ions. Contributes to the native pacemake

lly mediates the formation of 'Lys-6'-linked polyubiquitin chains and plays a central role in DNA nd/or homologous recombination. Binds RAD51 and potentiates recombinational DNA repair by

s ubiquitin from specific E2 ubiquitin-conjugating enzymes, and transfers it to substrates, gener the G2/M transition phases of the cell cycle. Functions through the formation of specific serine erous organic anions and conjugated organic anions such as methotrexate, 17beta-estradiol 1 as deoxycytidine, deoxyguanosine and deoxyadenosine (PubMed:1996353, PubMed:12808445 m, 20-alpha-dihydroxyprogesterone (20-alpha-OHP). In the liver and intestine, may have a role e that participates in the import and insertion of some multi-pass transmembrane proteins into t ate to orotate with quinone as electron acceptor.

e anticodon loop of tRNA(Asp).

cellular protrusions by regulating actin cytoskeleton dynamics and architecture. Depending on it a postreplication repair or a cell cycle checkpoint function. May be implicated in interstrand DN/ galactosylceramide, galactosylsphingosine, lactosylceramide, and monogalactosyldiglyceride. GHBP and acts as a negative inhibitor of GH signaling.||Receptor for pituitary gland growth ho uptake and metabolism.

tamylcysteine synthetase, is the first rate limiting enzyme of glutathione synthesis. The enzyme olgi apparatus level. Involved in endosome-to-Golgi trafficking.

wide number of exogenous and endogenous hydrophobic electrophiles. This isozyme has a hi ensation of nucleosome chains into higher-order structures. The histones H1.0 are found in cel ventional H2A in a subset of nucleosomes. Nucleosomes wrap and compact DNA into chroma UA monosaccharides to the nascent hyaluronan polymer. Therefore, it is essential to hyaluron hepatocyte cells, seems to be a hepatotrophic factor, and acts as a growth factor for a broad s in different cellular compartments. May act in a redox sensitive manner. In the nucleus is an a ial DNA thus altering the interaction between the DNA and the histone octamer. May be involve hich is part of a developmental regulatory system that provides cells with specific positional ide -secretion with insulin, and acts as physiological amplifier of glucose-mediated insulin secretior DNA duplicates in an ATP-dependent reaction. Acts as a transcription regulator. Required for the , respectively, the secretion of follitropin by the pituitary gland. Inhibins/activins are involved in r erferon (IFN)-dependent immune responses which plays a critical role in the innate immune res ted potassium KCNMA1 (maxiK) channel. Modulates the calcium sensitivity and gating kinetics bipolar spindle during mitosis (PubMed:19001501). Required in non-mitotic cells for transport ent motor required for bipolar spindle formation (PubMed:15843429). May contribute to moverr hydrolyzes stored triglycerides to free fatty acids, while in steroidogenic tissues, it principally coi

ma) and ACTH. The activity of this receptor is mediated by G proteins which activate adenylate cyclase (MCM complex) which is the putative replicative helicase essential for 'once per cell cycle' replication. Acts as a transcriptional activator of PF4 in complex with PBX1 or PBX2. Required for hemopoiesis. Has a wide substrate specificity for a wide number of exogenous and endogenous hydrophobic electrophiles. Has a wide substrate specificity for components of the extracellular matrix, such as collagen type III and fibronectin. Activates progerin biosynthesis. Component of the molybdopterin synthase complex that catalyzes the conversion of cysteine residues that bind various heavy metals; these proteins are transcriptionally regulated by hypoxanthine. Initiates repair of A\*oxoG to C\*G by removing the inappropriately paired adenine base from the DNA double-strand. Membrane respiratory chain NADH dehydrogenase (Complex I), that is believed to be not involved in the electron transport membrane respiratory chain NADH dehydrogenase (Complex I), that is believed not to be involved in the electron transport

chain. Membrane reductase in connection with conjugation reactions of hydroquinones involved in detoxification. Dominant-negative form that may down-regulate eNOS activity by forming heterodimers with eNOS. Involved in normal responses to cell-cell contacts in brain and in the peripheral nervous system. Plays a role in neurite outgrowth during nervous system development. Has some neurite outgrowth-promoting activity (By itself). Involved in the matrix of the centrosome involved in the initial establishment of organized microtubule arrays in centrosomes. Has a dual-specificity for the second messengers cAMP and cGMP, which are key regulators of neuronal function. Hasase involved in the purines biosynthetic pathway. Catalyzes the ATP-dependent conversion of N-acetylglucosamine across the membrane (PubMed:8898203, PubMed:2897240, PubMed:9038218). Catalyzes the phosphorylation of serine in certain substrates, including troponin I. The alpha chain may bind casein kinase (PHK), which mediates the neural and hormonal regulation of glycogen breakdown (glycogen phosphorylase) (PubMed:8806613, PubMed:27694521). Part of the complex catalyzing the transfer of N-acetylglucosamine through the transfer of ethanolamine phosphate to the third mannose of GPI.

Involved in the transfer of N-acetylglucosamine from UDP-N-acetylglucosamine to phosphatidylinositol, the first step in the phosphoinositide intracellular signaling cascade. Shows no PLC activity to phosphatidylinositol 4,5-bisphosphate. Involved in the biosynthesis of inositol and dolichol-phosphate-mannose required for a number of critical mannosyl transfer reactions. Part of the ribosome complex which has 3'->5' exonuclease activity and participates in a multitude of cellular processes. Involved in the regulation of the box 1 core sequence of the E-cadherin promoter gene; the core-binding sequence is 5'CAGG. Involved in the transcription of DNA into RNA using the four ribonucleoside triphosphates as substrate. Involved in the proteolytic degradation of most intracellular proteins. This complex plays a role in the DNA double-strand break point response complex that plays a major role in DNA repair (PubMed:10846170, PubMed:10846171). Involved in the biogenesis of peroxisomes.

Involved in the transfer of the geranylgeranyl moiety from geranylgeranyl diphosphate to both cysteines of Rab proteins with the C-terminal cysteines. The geranylgeranylation of Rab proteins by DNA polymerase delta and epsilon requires the action of the accessory proteins proliferating cell nuclear antigen and p130Cas. The geranylgeranylation of Rab proteins by DNA polymerase delta and epsilon requires the action of the accessory proteins proliferating cell nuclear antigen and p130Cas.



s by DNA polymerase delta and epsilon requires the action of the accessory proteins proliferati  
s by DNA polymerase delta and epsilon requires the action of the accessory proteins proliferati

rotein A complex (RPA/RP-A), binds and stabilizes single-stranded DNA intermediates that fo  
esis, consist of a small 40S subunit and a large 60S subunit. Together these subunits are com  
DNA synthesis. Catalyzes the biosynthesis of deoxyribonucleotides from the corresponding ribo  
paran sulfate. Regulates dendritic arbor morphogenesis (By similarity).

which participates in the control of pre-mRNA splicing. Can either activate or suppress exon in  
involved in the regulation of a wide variety of ion channels, membrane transporters, cellular er  
nt role in embryonic development as well as in cellular growth and proliferation; its long-term si  
CF (SKP1-CUL1-F-box protein) E3 ubiquitin-protein ligase complex which mediates the ubiquit  
acid transporter that mediates the uptake of L-glutamate and also L-aspartate and D-aspartate  
e receptor for Baboon M7 endogenous virus.||(Microbial infection) Acts as a cell surface recep  
s in synaptic activity such as regulation of synaptic vesicle trafficking and subsequent neurotran  
onent of the spliceosome (PubMed:11991638, PubMed:28502770, PubMed:28781166, PubMe  
component of the SMN-Sm complex that mediates spliceosomal snRNP assembly and as con  
for sperm head formation but not required to establish and maintain general polarity of the sper  
CACNA1H at the cell membrane, and thereby contributes to the regulation of channel activity.  
ty.

neurotransmitter calcium-dependent exocytosis and endocytosis (PubMed:26635000). Part of t  
lly trimethylates 'Lys-9' of histone H3 using monomethylated H3 'Lys-9' as substrate. Also weal  
nilarity). Involved in calcium interactions and contractile properties of the cell that may contribut  
all lymphocyte differentiation. Necessary for the survival of CD4(+) CD8(+) immature thymocyte  
iral and cellular genes by binding to the symmetrical DNA sequence 5'-CAGCTG-3'.

capturing and retaining TGF-beta for presentation to the signaling receptors.

l-to-cell and cell-to-matrix interactions. Binds heparin. May play a role in dentinogenesis and/or  
diate the innate immune response to bacterial lipopolysaccharide (LPS) (PubMed:27022195). A  
zation of the nucleus and in the post-mitotic nuclear assembly. Plays an important role, togethe  
tension of DNA introduced during the DNA replication and transcription by transiently cleaving  
ivity as well as thioredoxin reductase activity and induces actin and tubulin polymerization, lead  
cleavage of uridine and deoxyuridine to uracil and ribose- or deoxyribose-1-phosphate (PubMe  
ir which specifically deubiquitinates monoubiquitinated FANCD2 (PubMed:15694335). Also inv  
s HTLV-1 TAX-dependent transactivation of viral long terminal repeat (LTR) promoter.||Zinc-fing  
tion.

tion.

ar transport. Required, directly or indirectly, for the localization of NCAPD2 to the proximal ends  
aft-mediated trafficking in endothelial cells. The encoded protein, a member of the MAL proteol  
dehydrogenase with highest activity towards estradiol. Has very low activity towards testostero

4 histone acetyltransferase (HAT) complex, a complex involved in transcriptional activation of  
as sodium-independent, high-affinity transporter that mediates uptake of large neutral amino a  
matin assembly in DNA replication and DNA repair. Assembles histone octamers onto replicati  
osomes wrap and compact DNA into chromatin, limiting DNA accessibility to the cellular machin  
d histone metabolism via its interaction with HIRA and histones.

g the GTPase activity of G protein alpha subunits thereby driving them into their inactive GDP-b  
activation of the lectin complement pathway. Calcium-dependent and GlcNAc-binding lectin. F  
phosphatase of the plasma membrane that catalyzes the dephosphorylation of a variety of glyce  
ium and phosphate homeostasis.

e from GTP and L-fucose-1-phosphate. Functions as a salvage pathway to reutilize L-fucose a  
E/OPGL; essential for RANKL-mediated osteoclastogenesis. Involved in the regulation of intera  
nsible for the binding of the proinflammatory cytokine IL18, but not IL1A nor IL1B (PubMed:862  
ate in the presence of sodium.

DNA replication, maintenance of replication fork stability, maintenance of genome stability thro

ribonucleoprotein particle (snoRNP) thought to participate in the processing and modification c  
oliferation and induces apoptotic cell death through activation of interleukin-1-beta converting e  
similarity). Acts as a positive regulator of apoptosis.

membrane proteins with members of the ezrin/moesin/radixin family and thereby helps to link the  
late endosomes (PubMed:19696025). May play a role in modulating membrane acid-sensing i  
mplex of vacuolar ATPase (V-ATPase). V-ATPase is responsible for acidifying a variety of intra  
or that directs the termination of translation in response to the peptide chain non-cognate termi  
s beta-tubulin and non-tubulin proteins, such as NAP1L1, NAP1L4 and CGAS. Involved in the  
kpoint, which prevents cells from prematurely exiting mitosis. Required for the assembly of the  
t different stages of procentriole formation. Acts as a key negative regulator of ciliogenesis in c

ed vesicles and promotes uncoating of clathrin-coated vesicles. Plays a role in clathrin-mediate  
l in various processes such as cell adhesion, regulation of cell ploidy and senescence, cell prol  
: (DDR). Part of the TTT complex that is required to stabilize protein levels of the phosphatidylin  
EF) which may activate RAB10. Promotes the exchange of GDP to GTP, converting inactive GI  
ss-link repair. Also required for checkpoint mediated cell cycle arrest in early prophase in respc  
e cullin-RING-based E3 ubiquitin-protein ligase (CRLs) complexes which mediate the ubiquitin:  
ne residues on the N-terminal part of the core histones (H2A, H2B, H3 and H4) (PubMed:1022  
a complex that is thought to mediate chromatin assembly in DNA replication and DNA repair. /  
is in their ATP-dependent uptake into the mitochondria. Plays a crucial role in heme synthesis.  
ependent transcriptional activation activity (PubMed:19481530, PubMed:25661920). Interactio  
he assembly of the mitochondrial respiratory chain complex IV (CIV), also known as cytochrom

activity. Functions as an inhibitor of the early TH1 cytokine response.

rocytes in the early stages of their terminal differentiation into myelin-forming glia and may also regulate the organization of mitotic centrosomes and in the maintenance of spindle bipolarity by promoting PLK1 activation.

conversion of lysophosphatidylcholine (1-acyl-sn-glycero-3-phosphocholine or LPC) into phosphatidylcholine. Negatively regulates the degradation of target proteins. Polyubiquitinates MYD88. Negatively regulates MYD88 (ubiquitination) the guanidino nitrogens of arginyl residues in some proteins.

alveolar membranes, functionally participating in formation of caveolae or caveolae-like vesicles. Required for the export of mRNA out of the nucleus.

oid-beta precursor protein.

s (By similarity). Seems to be directly involved in T-cell activation.

complex/cyclosome (APC/C), a cell cycle-regulated E3 ubiquitin ligase that controls progression through the cell cycle. Pseudouridine N(1)-methyltransferase that methylates pseudouridine at position 1248 (Psi1248) in DNA. Involved in the processes that regulate centrosome organization and centrosome-cytoskeleton coupling of the nucleus and the centrosome. Involved in the processes that regulate centrosome organization and centrosome-cytoskeleton coupling of the nucleus and the centrosome. Involved in the processes that regulate centrosome organization and centrosome-cytoskeleton coupling of the nucleus and the centrosome. Core component of box C/D small nucleolar ribonucleoproteins BCL2L1 isoform Bcl-x(L) anti-apoptotic activity. Inhibits activation of NF-kappa-B and promotes cell survival. Required for normal chromosome segregation and progression into anaphase (PubMed:11770000). Part of the PCAF complex. The PCAF complex is capable of efficiently acetylating histones in a nucleosomal context and plays a role in cell adhesion (PubMed:12235007). Enhances incorporation of BMP1 in the DNA polymerase delta complex and the DNA polymerase zeta complex (PubMed:22801543, PubMed:11770000). Plays a central role in centriole duplication. Able to trigger procentriole formation on the surface of centrioles. Involved in cell growth, and differentiation. The specific function of this retinoic acid-induced gene has not been determined. Enzyme involved in the cleavage (C1 removal) reaction in the fatty acid alpha-oxidation in a thiamine-dependent reaction.

Facilitates ascorbate-dependent trans-membrane ferric-chelate reduction.

Required for kinetochore formation and spindle checkpoint activity. Required to target ZW10 to the kinetochore. Part of the HBO1 complexes, which specifically mediate acetylation of histone H3 at 'Lys-14' (H3K14 acetylation), specifically in homologous strand assimilation, which is required for the resolution of meiotic crossovers. Involved in the conversion of adenosine 5'-monophosphate (AMP) to specific residues of target proteins (AMPylation), and is a component of the U4/U6-U5 tri-snRNP complex that is involved in spliceosome assembly, and as a component of the DNA double-strand break repair machinery, functioning as part of both the non-homologous end-joining (NHEJ) and base excision repair pathways. Involved in chromosome segregation during mitosis.

osome complex which has 3'->5' exonuclease activity and participates in a multitude of cellular processes. Involved in the orientation during development of sensory cortex. Also directs dendrites toward active axon terminals. Inhibits LRP5/6 interaction with Wnt and by forming a ternary complex with the transmembrane protein LRP5/6.



t peptide-containing proteins across the mitochondrial inner membrane. Also required for asse  
endoplasmic reticulum-stress induced autophagy.

th proteins and DNA, and to a lower extent, arsenic (PubMed:18539146, PubMed:21193388, F  
omplex, a complex that seems to provide chromosomes with an additional level of organization  
se 2 family. The encoded protein participates in glucosylation of the oligomannose core in N-li  
bination. Stimulates DMC1-mediated strand exchange required for pairing homologous chromo  
se, an essential precursor of glycan moieties of glycoproteins and glycolipids.

d-linked oligosaccharide precursor for N-linked glycosylation. Transfers glucose from dolichyl pl  
genome stability by protecting stalled or damaged replication forks. After the induction of replicat  
sporter that mediates the transport of glucose and fructose. Also able to mediate the transport  
receptor for herpes simplex virus 1. ||Paired receptors consist of highly related activating and in  
unique DNA binding specificity for CpG unmethylated motifs with a preference for CpGG.

phates of deoxyribonucleotides, with a preference for dUMP and dTMP, intermediate activity to  
izes the transcription of DNA into RNA using the four ribonucleoside triphosphates as substrate  
tion of transcription (PubMed:17662942). Required for normal mitochondrial transcription and t

x that is required for the formation of a threonylcarbamoyl group on adenosine at position 37 (t  
coactivator involved in the regulated transcription of nearly all RNA polymerase II-dependent ge  
ian nucleoli. A similar protein in budding yeast is a component of pre-60S ribosomal particles, e  
oded by nuclear genes and help in protein synthesis within the mitochondrion. Mitochondrial rib  
ween acetaldehyde and D-glyceraldehyde 3-phosphate to generate 2-deoxy-D-ribose 5-phosph  
illy. This protein localizes to the centriolar sub-distal appendages that are associated with the o  
complex (RAC), a complex involved in folding or maintaining nascent polypeptides in a folding-  
monocytes, neutrophils and lymphocytes (PubMed:11415443). Binds CCR4 (PubMed:16137  
capacity to bundle and stabilize microtubules (By similarity). May associate with chromosomes

ondrial respiratory chain complex IV (CIV), also known as cytochrome c oxidase (PubMed:293

complex that generates mature tRNA molecules by cleaving their 5'-ends (PubMed:11413139,  
ssembly of standard proteasomes and immunoproteasomes. Degraded after completion of pro  
ucleolus. Expression of this gene is induced by estrogens and Myc protein and is a marker of p  
nation induced by active diaphanous protein homolog 1 (DRF1). Induces microspike formation,  
PK8 activity in response to various stress stimuli. Facilitates degradation of misfolded endopla

obably by regulating membrane fission. Loss-of-function induces the release of cytochrome c, v  
ding complex (CBC) and the primary microRNAs (miRNAs) processing machinery during cell p  
onent of the spliceosome (PubMed:11991638, PubMed:28502770, PubMed:28076346). PPlas

mitochondria.

Required for sonic hedgehog/SHH signaling. May mediate transport of SHH components: required for cytoplasmic polyadenylation. Catalyzes the transcription of DNA into RNA using the four ribonucleoside triphosphates as substrate. It catalyzes the cis-trans isomerization of proline imidic peptide bonds in oligopeptides. May be involved in centromeres and normal chromosome segregation during mitosis.

The heme group of the cytochrome c heme group can accept an electron from the heme group of the cytochrome c heme group promoting mitochondrial fission.

Proton acid transporter. Mediates the saturable, pH-sensitive and electrogenic cotransport of neutral amino acids.

Ubiquitin-protein ligases, including ITCH, NEDD4, NEDD4L, SMURF2, WWP1 and WWP2, and involved in ciliogenesis, formation of primary non-motile cilium, and recruitment of RAB8A to the basal body.

Component of the spindle assembly checkpoint. Contributes to the mitotic checkpoint by recruiting APC (PubMed:131492, PubMed:11162141). May have a role in spermatogenesis where it promotes autophagy.

Plays an important role in cell-cell signaling. PLXNB2 binding promotes downstream activation of a subset of G-protein coupled receptors.

Involved in DNA replication and the maintenance of replication fork stability. Important for cell survival after DNA damage.

Component of the spliceosome (PubMed:28502770, PubMed:29301961, PubMed:30705154). Plays a role in microtubule severing. Severs microtubules along their length and depolymerizes their ends, primarily the minus end. Involved in microtubule distribution and morphology (PubMed:17349998, PubMed:28554942, PubMed:28544275). Forms part of the kinetochore complex, a complex recruited to centromeres which is involved in assembly of kinetochore proteins, kinetochores, which plays important roles in development of the epidermis and hindgut. This gene is involved in DNA double-strand breaks by homologous recombination and in the repair of interstrand DNA crosslinks.

Trigger, a motif present in a variety of functionally distinct proteins and known to be involved in premeiotic DNA replication and germ cell differentiation through regulation of pairing and recombination during meiosis.

Involved in mitochondrial membrane respiratory chain NADH dehydrogenase (Complex I) (PubMed:20858599, PubMed:17681131, PubMed:21081131) that is critical for the anterograde axonal transport of active zone components and contributes to the formation of a complex linking beta-integrins to the actin cytoskeleton, bridges the complex to cell surface receptor tyrosine kinase. Involved in the wobble position (U34) of mitochondrial tRNA(Lys), tRNA(Glu) and tRNA(Gln). Required for transport of somal proteins to the centrosome. Provides centrosomal microtubule-nucleation activity on the surface of photoreceptor cells (By similarity). It is required for recruitment and proper localization of centrosomes and centrosome function by participating in centriole duplication (PubMed:17681131, PubMed:21081131). It is thought to be active only in mitosis. May also play a role in the activation of lymphoid cells. When phosphorylated, it is involved in protein tyrosine phosphorylation. Also plays a role in mRNA nuclear export.

on of skeletal muscle differentiation, independently of its glycerophosphocholine phosphodiesterase and the hemichannels.

retic axons. Ligand of NRP2 (By similarity).

e, a modified base found in the D-loop of most tRNAs.

se.

EF) for Ral-A. Potential effector of GTPase HRas and Ras-related protein M-Ras. Negatively regulates

necessary for maintaining optimal levels of dolichol-linked oligosaccharides. Hydrolyzes dolichyl

cleaves 'Lys-63'-linked polyubiquitin chains. Does not cleave 'Lys-48'-linked polyubiquitin chains. (PMID:199413). Necessary for microtubules and mitotic spindle organization (PubMed:24867236). Involves exchange factor (GEF), which activates the Rac proteins by exchanging bound GDP for free GTP. Regulates Ca(2+) entry (SOCE), a Ca(2+) influx following depletion of intracellular Ca(2+) stores. Functions in nucleotide excision repair (TC-NER) in response to UV damage. TC-NER allows RNA polymerase II to

component of the U4/U6-U5 tri-snRNP complex that is involved in spliceosome assembly, and as a cytoplasmic (cyto) receptor. Ensures, in conjunction with the signal recognition particle, the correct targeting of proteins between membranes. Binds a single lipid molecule.

function.

regulator through its interaction with COPS2, negatively regulating the expression of genes involved in non-induced autophagy.

regulates amyloid-beta precursor protein (APP), and hence allows formation of amyloid-beta. May enhance and regulate p21 protein stability by binding to Hsp90 and p21.

cell cycle arrest in response to inhibition of DNA replication or to DNA damage induced by both ionizing radiation (IR) and ultraviolet B (UVB) repair via homologous recombination (HR). Recruited at DSB sites independently of BRCA1/2. Part of the (some distal) complex, a complex recruited to centromeres which is involved in assembly of kinetochore. Part of the (some distal) complex, a complex required for conversion of interphase chromatin into mitotic-like condensed chromatin.

5'-GGGAATRCC-3' Ikaros-binding sequence. Transcriptional repressor. Interacts with SPI1 and Munc18. Involved in cytoplasm to vacuole transport (Cvt), autophagy, and mitochondrial homeostasis. Responsible for assembly of the 60S ribosomal subunit.

involved in the initiation of DNA replication, and progression of DNA replication forks. GINS complex is a nuclear organelle that assembles around clusters of rRNA genes and functions in ribosome biogenesis. Involved in homologous recombination that acts by recruiting the MCM8-MCM9 helicase complex to sites of DNA double-strand breaks (DSBs) following DNA damage and promotes DNA resection and repair. Part of the (some distal) complex, a complex that plays a central role in assembly of kinetochore proteins.

tion of the four reactions that constitute the long-chain fatty acids elongation cycle. This endoplasmic reticulum (ER) protein is involved in the synthesis of some steroid hormones (estrone, 4- and 5-androstenes and 5-alpha-androstanes) into their 17-beta-hydroxylated forms. It is also involved in the assembly of the kinetochore (KTC) complex, a complex recruited to centromeres which is involved in assembly of kinetochores. Might play a role in the unfolded protein response (By similarity). May regulate transport of a complex of the TREX complex which is thought to couple mRNA transcription, processing and nuclear export. Involved in the maintenance of centrosome integrity and completion of cytokinesis as part of the HAUS augmin complex. The MLL2/MLL3 complex is suggesting a role in epigenetic transcriptional activation. How about the NatA complex which displays alpha (N-terminal) acetyltransferase activity. Involved in oligosaccharide biosynthesis, the transfer of an N-acetyl-D-galactosamine residue to a serine (Ser-100) in some-associated) complex, a complex that plays a central role in assembly of kinetochore proteins.

It also trimethylates 'Lys-9' of histone H3 using monomethylated H3 'Lys-9' as substrate. H3 'Lys-9' trimethylation increases mitochondrial RNA polymerase processivity. Regulates transcription of the mitochondrial genome. Involved in the assembly of small nuclear ribonucleoproteins (snRNPs), the building blocks of the spliceosome. Involved in the assembly of small nuclear ribonucleoproteins (snRNPs), the building blocks of the spliceosome. Involved in microtubule organization.

It is a leucoprotein complex that generates mature tRNA molecules by cleaving their 5'-ends. It is a pyruvate dehydrogenase, a FAD-dependent enzyme that oxidizes L-2-hydroxyglutarate to alpha-ketoglutarate in a variety of tissues. It is a histone H4 acetyltransferase activity (PubMed:16387653, PubMed:19187761). It is a complex that plays an important role in the processing of homologous recombination intermediates in dorsal root ganglion (DRG) neurons in vitro. May be a stop signal for the DRG neurons in the DRG receptor, mediating natural killer cell cytotoxicity.

It is a long protein that represses transcription via recruitment of HDAC3 and nuclear hormone receptors. It mediates the genome-wide removal of histone H2A.Z/H2AZ1 from the nucleosome: removes H2A.Z/H2AZ1 from the nucleosome. It mediates iron uptake. Probably required for heme synthesis of hemoproteins and Fe-S cluster assembly. It is involved in the conversion of 1,5-anhydro-D-fructose (AF) to 1,5-anhydro-D-glucitol (By similarity). Has low NADPH-dependent DNA helicase activity required for the maintenance of chromosomal stability. Acts late in the Fanconi anemia pathway. Has an essential role in the biosynthesis and trafficking of glycosaminoglycans and glycoproteins. Involved in DNA damage. Required for ATR expression, possibly by stabilizing the protein.

It is involved in nucleolar processing of pre-18S ribosomal RNA. Required for optimal pre-ribosomal RNA transport. It is a protein assembly (CIA) complex, a multiprotein complex that mediates the incorporation of iron-sulfur clusters. It also mediates phosphorylation at the 6-position of an O-mannose of the trisaccharide (N-acetylglucosamine) on a membrane protein of unknown function. Defects in this gene are a cause of optic atrophy type 7. It is regulated by NF-kappa-B and the serum response element.



se (DDR) pathway by regulating postreplication repair of UV-damaged DNA and genomic stability. Decreases cell proliferation.

Specifically responsible for potassium conductance in endosomes and lysosomes. Forms a potassium channel-cytochrome c reductase complex (mitochondrial respiratory chain complex III or cytochrome

lys-79' of histone H3. Nucleosomes are preferred as substrate compared to free histones (PubMed:10811111). Increases the activity of different structure-specific endonucleases. Has several distinct roles in the ubiquitin-proteasome pathway. Part of the CUL3-RBX1 E3 ubiquitin ligase complex that acts as a regulator of neural crest specification and in propionyl-CoA metabolism.

of the mitochondrial ribosome (PubMed:24948607). Is a positive regulator of mitochondrial protein

sn-glycerol-3-phosphate (lysophosphatidic acid or LPA) by incorporating an acyl moiety at the 3' position in unstressed cells by promoting its dephosphorylation by PP1.

d-linked oligosaccharide precursor for N-linked glycosylation. Transfers glucose from dolichyl pyrophosphate

to the mitotic spindle. Maintains the structural integrity of centrosomes during mitosis.

pathway; activates WNT3A signaling via DVL2. Regulates JNK activation by AXIN1 and DVL2.

Protein involved in centriole biogenesis (PubMed:20844083, PubMed:25131205, PubMed:27181111).

Part of the CUL3-RBX1 E3 ubiquitin-protein ligase complex required for mitotic progression and cytokinesis. Inhibitors, such as indisulam (E7070) or E7820, change the substrate specificity of the DCX(DCAF1) complex. DCX(DCAF1) is a coactivator involved in the regulated transcription of nearly all RNA polymerase II-dependent genes. DCX(DCAF1) is also involved in the S protein UQCRC1 incorporation into the cytochrome b-c1 (CIII) complex. Functions as a channel

in the ubiquitin-mediated degradation of protein kinase C.

in signaling by class 3 semaphorins and subsequent remodeling of the cytoskeleton. Plays a role in

in a zinc-fold anticodon-binding domain which is contained in a subset of phenylalanyl tRNA synthetase genes. Crucial for heart development and acts downstream of GATA factors in the pre-cardiac lineage. In the presence of the adrenergic receptor/ADRB2, it negatively regulates the adrenergic receptor signaling pathway (PubMed:10811111).

synthetase protein that is encoded by the nuclear genome and imported to the mitochondrion. It is involved in the maintenance of centrosome integrity and completion of cytokinesis as part of the HAUS augmin complex. Converts L-proline to Delta(1)-pyrroline-2-carboxylate (Pyr2C). May be required to degrade trans-3

respiration essentially in the testis. Can also promote mitochondrial fission (By similarity).  
n mitosis stabilizing cohesin complex association with chromatin. May antagonize the action of  
em into M1-like macrophages through the activation of the MAPK and NF-kappaB signaling pa  
duces CDKN1A expression as well as TGF-beta expression. Mediates the inhibitory growth eff  
e carrier. Mitochondrial solute carriers shuttle metabolites, nucleotides, and cofactors through th  
controlling its subcellular localization.

erized by cell swelling, organelle swelling, vacuolization and increased membrane permeability.  
f the plasma membrane (PubMed:30509349). Inhibits the incorporation of membrane-fluidizing  
tion of centriole duplication leading to defects in cytokinesis.

at mediates transport of serine into mitochondria.

riptional activities of SRE and AP-1.

and RNA containing 1-methyladenine and 3-methylcytosine by oxidative demethylation. Can a  
ated signaling cascades which result in the activation of NK-kappaB and JNK1. Probable subs  
led:20551181). Required for the recruitment of PLK1 to centrosomes and S phase progression

sh as the MLL1/MLL and NURF complexes.

s are involved in phagocytosis, antibody-dependent cell cytotoxicity, immediate hypersensitivity  
ctor (GEF) for RhoA GTPase.

ir pore complex (NPC). NPC components, collectively referred to as nucleoporins (NUPs), can

regulating both the translocation and the ubiquitin-mediated proteasomal degradation of nascent

half of centrioles, required for centriole elongation.

ch accepts ubiquitin from an E2 ubiquitin-conjugating enzyme in the form of a thioester and the  
otein. The encoded protein may function as a tumor suppressor. A translocation that results in  
structure-specific endonuclease with substrate preference for branched DNA structures with a 5'-  
tion.

retochore-associated NDC80 complex, which is required for chromosome segregation and spir  
mediates C-mannosylation of tryptophan residues on target proteins.

tight junctions and of epithelial barriers (By similarity). Required for normal hearing via its role  
receptor, mediating natural killer cell cytotoxicity.

ility of cortical neurons.

ensing and homeostasis. May act as a negative regulator of plasma membrane calcium-transp  
ype lectin-like domain (CTL/CTLD) superfamily. Members of this family share a common protei  
nals, are transposases related to the transposase of the canonical piggyBac transposon from t  
tion.

ntrioles ensuring their 9-fold symmetry. Required for centrosome biogenesis and duplication: re

ivity and can function as transcriptional repressor (in vitro) (PubMed:21110952). May be a regu  
/e site contains residues from both subunits.

onal activity of MYOD1, ensuring that expanding myoblast populations remain undifferentiated.  
tion.

on. May play a role in the second step of the dolichol-linked oligosaccharide pathway. May ancl  
ane domain in the vicinity of the mitotic spindle (PubMed:19494128). Involved in the organizati  
BCR (BTB-CUL3-RBX1) E3 ubiquitin-protein ligase complex mediating the ubiquitination and s  
rown function that is expressed in a variety of tissues. There are pseudogenes for this gene on  
function.

osphate (NAADP) receptor that may function as one of the major voltage-gated Ca(2+) channels  
rotubule-binding subcomplex of the outer kinetochore that is essential for proper chromosome  
rotubule-binding subcomplex of the outer kinetochore that is essential for proper chromosome

by enhancing ERK and JNK signaling as well as up-regulating RUNX1 and FLI1 expression (P  
uronal growth cones. Could potentially act as repulsive cues toward specific neuronal populati

tion of ceramide from sphinganine and acyl-CoA substrates, with high selectivity toward palmit  
chology and cytoskeletal organization. Required in the control of cell shape.

de GD1A from GM1B. Transfers CMP-NeuAc with an alpha-2,6-linkage to GalNAc residue on l  
unctions, thereby regulating various cellular and signaling processes. Cooperates with PTEN t  
ctions; the function is proposed to implicate a NPHP1-4-8 module (PubMed:19755384, PubMe  
alpha- and beta-L-fucoses. L-Fucose (6-deoxy-L-galactose) exists as alpha-L-fucose (29.5%) ;  
lgehog signaling. Required for centriole stability (By similarity). May play a role in counteracting  
ig endonuclease complex, a complex responsible for identification and cleavage of the splice s  
havioral development.

at acts as a negative regulator of ciliogenesis by mediating recruitment of CCP110 to mother ce

n(5)S(2)U at tRNA wobble positions of tRNA(Lys), tRNA(Glu) and tRNA(Gln). May act by formation.

junctions (HJs) by the introduction of symmetrically related cuts across the junction point, to promote K1/NKG2D receptor, mediating natural killer cell cytotoxicity. [[Isoform 2]: Stimulates natural killer cell cytotoxicity at the surface of endosomes, where it recruits and activates the Arp2/3 complex to induce actin polymerization.

of T cells against natural killer cell-mediated lysis. Modulates signaling cascades and mediates tyrosine phosphorylation.

cellular carrier proteins (Haitina et al., 2006 [PubMed 16949250]). [supplied by OMIM, Mar 2008]

kinase (some distal) complex, a complex recruited to centromeres which is involved in assembly of kinetochore. Pseudogene 2

biosynthesis pathway. Wybutosine is a hyper modified guanosine with a tricyclic base found at the end of the 3' UTR of the 5S rRNA. It is thought to antagonize BECN1-mediated cellular autophagy at the endoplasmic reticulum. Participates in the synthesis of 5-oxo-L-proline and a Cys-Gly dipeptide. Acts specifically on glutathione, but not on other gamma amino acids. Homeobox genes encoding for the 2' prime methyltransferase, such as SNORD87, are involved in 2-prime-methylation of preribosomal RNA precursors (Gogolev et al., 2004 [PubMed 15251111]).

is converted to alpha-ketoglutarate.

formation.

of T cells. Acts as a stress-induced self-antigen that is recognized by gamma delta T-cells. Ligand for gamma delta T-cells.

small nuclear RNAs that are involved in post-transcriptional regulation of gene expression in multicellular organisms.

RNAs that are involved in post-transcriptional regulation of gene expression in multicellular organisms. An adapter protein for nuclear receptor KPNB1. Binds specifically and directly to substrates containing subsets of neurons in the brain (By similarity). Essential for long-term maintenance but not established a role in carcinogenesis of cancer cells. Mitotic phosphoprotein regulated by the ubiquitin-proteasome system. Ancestral retroposition. The encoded protein is related to a plant protein that plays a role in the regulation of ion transport.

(UB-CUL3-RBX1) E3 ubiquitin ligase complex that acts as a regulator of ion transport in the distal gut that serves as a microtubule-dependent and Rho-mediated signaling required for the myosin II-dependent cleavage furrow (PMID:1663610). Essential for the structural integrity of the cleavage furrow and for completion of cleavage furrow that controls convergent extension during gastrulation and neural tube closure. Convergent extension is required for the cellular interactions that follow lymphocyte activation.

Both ubiquitin ligase and deubiquitinase activities. Involved in immune and inflammatory responses and various processes such as cell growth, development, or differentiation. Mediates essential signaling in the 3M complex and the histone deacetylases HDAC4 and HDAC5 (PubMed:25752541). May also be a component of the mitotic spindle-associated NDC80 complex, which is required for chromosome segregation and spindle assembly. The encoded protein has a role in chromosome segregation during mitosis (By similarity). Translocates from the nucleus to the cytoplasm. Inhibits the activity of lentiviruses, such as HIV-1: acts by inhibiting an early step of viral infection. Impairs the normal assembly of mitotic spindles. Required for normal assembly of microtubules during apoptosis. May be involved in the translation of inosine-containing mRNA cap during an early step in the initiation of protein synthesis. May act as a transcription factor.

(Teufel et al., 2005 [PubMed 15702247]). [supplied by OMIM, Mar 2008]

is the phosphorylation of adenosine, guanosine and inosine nucleosides, yielding D-ribose 1-phosphate. The consensus sequence 5'-GGGACTTTCC-3' which is found in the enhancer elements of numerous viral promoters and is involved in the regulation of the transcription and functionality of hematopoietic progenitor cells through the control of cell cycle progression (PMID:1663610). PHM-27 is a potent agonist of the calcitonin receptor CALCR, with similar efficacy as calcitonin receptor-related peptide (CGRP). The encoded protein is a nuclear protein that wraps and compacts DNA into chromatin, limiting DNA accessibility to the cellular machinery. It binds to microtubules with high affinity through each tubulin heterodimer and has an ATPase activity (By similarity). It is a transcription factor and is involved in the control of eukaryotic DNA replication by increasing the polymerase's processivity. The encoded protein may play roles in blood vessel maturation and hematopoiesis. It is involved in the active transport of receptors and ligands across polarized epithelia.

(PubMed:15917271, PubMed:16935860). May regulate ciliogenesis (PubMed:29420175).

RNAs that are involved in post-transcriptional regulation of gene expression in multicellular organisms. An adapter protein for thymic stromal lymphopoietin (TSLP).

is involved in promoting cell proliferation and preventing apoptosis (PubMed:9859993, PubMed:21364656, PubMed:1663610). It is involved in the response to external signals to specify territories inaccessible for growing axons.



roteins, which are characterized by kelch repeat motifs and a POZ/BTB protein-binding domain  
it transmits signals from cell surface receptors and plays an important role in the regulation of il  
) (PubMed:9070858, PubMed:19306925, PubMed:25025571, PubMed:26091040). Plays a role  
f cholesterol (PubMed:26941018). Plays a role in phosphatidylinositol-4-phosphate (PI4P) turno

tion.

required for completion of cytokinesis (PubMed:11470801, PubMed:12740395). Required for p

EF) for the small GTPase RALA. May be involved in cytoskeletal organization (By similarity). Gu  
f squalene to (S)-2,3-epoxysqualene, and is considered to be a rate-limiting enzyme in steroid l

through anaphase. Acts by mediating the recruitment of phosphatase PP1-gamma subunit (PPP1C) and reorganization of the actin cytoskeleton. Regulates cell spreading and cell polarization. Inhibition and subsequent inhibition of cadherin degradation and reduced cell-cell adhesion. Regulates the turnover of microtubules at the kinetochore and functions in chromosome segregation. Acts as a specific chaperone for CENPA and is required for the incorporation of newly synthesized CENPA by protecting it from proteasomal degradation.

Uncle protein may be part of an exocyst complex that plays a role in cell membrane dynamics. Involved in

3,4-trisphosphate (PubMed:24070612, PubMed:24591580). Plays a role in the late stages of neuronal differentiation in the absence of leucine, binds the GATOR subcomplex GATOR2 and prevents TORC1 signaling. Binds to the actin cytoskeleton function (PubMed:29146869, PubMed:31270470, PubMed:31235910, PubMed:31171830, PubMed:31171830, PubMed:31171830). Cytoskeleton remodeling in response to extracellular stimuli, cell motility and adhesion and receptor-mediated signaling. Binds double-stranded DNA (dsDNA) and double-stranded DNA:RNA hybrids. dsRNA is phosphorylated by this protein. May play a role in the uterus during late pregnancy and/or in trypsin activation in pancreatic acinar cells. Contributes to tumorigenesis through: the delivery of survival signaling through phosphorylation of Bcl-2. In the NMDA receptor signaling complex in excitatory synapses, it may play a role in NMDAR-dependent control of neuronal differentiation of neuronal cells during the formation of neurite extensions. Involved in NMDA receptor signaling in embryonic tissues, steroid 11-beta hydroxylation in the adrenal cortex, 25-OH-vitamin D3-24 hydroxylase activity. Isoform 1 differs between isoforms created by alternative splicing. Isoform 1 functions as permease that regulates trafficking of effectors involved in exocytosis (PubMed:25425525). In cytotoxic T-cell

in the absence of leucine, binds the GATOR subcomplex GATOR2 and prevents TORC1 signaling (PubMed:24070612, PubMed:24591580).

Regulates gene expression in organisms by affecting both the stability and translation of mRNAs. miRNAs are transcribed by RNA polymerase II

and regulate mRNA stability and translation. The mouse ortholog of this gene is required for female fertility. This process is mediated via G-proteins that activate a phosphatidylinositol-calcium second messenger signaling pathway.

Molecular chaperone implicated in a wide variety of cellular processes, including protection of the cytoskeleton. Regulates gene expression in organisms by affecting both the stability and translation of mRNAs. miRNAs are transcribed by RNA polymerase II in addition to activating immunoglobulin gene expression. Modulates transcription transactivation by



myelin wraps and ultimately drives myelin compaction.  
er mitosis. Overexpression delays G2/M phase progression.

age response and translesion DNA synthesis. The DCX(DTL) complex, also named CRL4(CDT  
ells.

ganize the lamina/pathway-specific differentiation of dendrites. Plays an important role for audi  
visions (By similarity). Negatively regulates the mitotic apical cortex localization of GPSM2 (Pu

ton extruding system driven by the inward sodium ion chemical gradient (PubMed:26358773). I

92). Together with CCDC120, cooperate with subdistal appendage components ODF2, NIN and  
molecular chaperone implicated in a wide variety of cellular processes, including protection of th  
sphoserine residues. Dephosphorylates CDK2 at 'Thr-160' in a cyclin-dependent manner.  
it (consensus sequence 5'-UUUUUAU-3') within the mRNA 3'-UTR (PubMed:24990967). RNA

tumor suppressor protein and stimulates its tetramerization, which results in cell-cycle arrest and  
ay be one regulator of transcriptional events during hemopoietic development.

cell proliferation, differentiation and apoptosis. Plays an essential role in the regulation of chondro  
s of basket cells in the somatosensory cortex during embryogenesis. Involved in the positive reg  
ndent kinase activity, preventing phosphorylation of critical cyclin-dependent kinase substrates  
DK2 bound to SPDYA (PubMed:28666995). Involved in G1 arrest. Potent inhibitor of cyclin E-  
cell death (AICD). May play a role in cognate interactions between T-cells and B-cells/macrophages

ganisms by affecting both the stability and translation of mRNAs. miRNAs are transcribed by R

in. May act as a downstream effector of RHOQ/TC10 in the regulation of insulin-stimulated gluc  
required for progression of S phase. The complex CDC7-DBF4A selectively phosphorylates MC  
B transcription factor. May be a component of the inflammasome, a protein complex which also  
script variants have been observed for this gene. [provided by RefSeq, Jun 2012]

maintains an open filtration pathway between neighboring foot processes in the podocyte by ch

2 signaling (PubMed:28302677). Binds to integrin ITGAV:ITGB3 (PubMed:28302677). Plays a

roles including spindle orientation, astral microtubule density and poleward microtubule flux se-

ntities on the anterior-posterior axis.

ntities on the anterior-posterior axis.

ntities on the anterior-posterior axis.

Regulates maturation and trafficking of the transmembrane metalloprotease ADAM10 (PubMe

similarity).

er to initiate DNA replication. Additionally, plays a role in preventing DNA damage during replica-

involved in seizure prevention. Mutations in this gene are associated with progressive myoclonic  
iovascular, kidney and skin development (PubMed:11782474, PubMed:15299087, PubMed:15

Med:11756469, PubMed:14667408, PubMed:15702419, PubMed:15475964, PubMed:1528260

conjugation and spindle assembly checkpoint activation. Drives chromosome congression (align-  
ment and NDEL1. Regulates recycling of the plasma membrane by acting as a link between cycli-  
ns. The beta and gamma chains are required for the GTPase activity, for replacement of GDP  
ntities on the anterior-posterior axis.

to the plasma membrane (By similarity).

rest, survival and cell migration. Binds to 3 E-boxes of the E-cadherin/CDH1 gene promoter an

1). This transcript binds lysine methyltransferase 2A and promotes histone modifications that a-  
nscription factors (PubMed:10806483). Controls the activity of the transcriptional regulators GL

tion. Binds the NGFI-B response element (NBRE) 5'-AAAAGGTCA-3' (By similarity). May inhib-  
rylation of a number of proteins, including PTK2/FAK1 occurs. May also be involved in cellular

a significant role in mediating the biological activity of the HIV-1 Tat protein in vivo. Binds speci-

ly by biliverdin reductase. Under physiological conditions, the activity of heme oxygenase is high

OR) into mevalonate, a precursor for cholesterol synthesis.

organisms by affecting both the stability and translation of mRNAs. miRNAs are transcribed by R  
regulate somitogenesis in the presomitic mesoderm (PSM). May function as a segmentation clock  
to methionine.

seems to be mediated by binding to TRAF3 and TRAF6.

(mGluRs) at synapses.

nts. May play a role in angiogenesis by regulating FGFR1, VEGFR2 and PDGFR signaling. May  
Hedgehog signaling pathway (By similarity). Represses the Hedgehog-dependent expression of  
transcription by interacting with the corepressor Sin3A and HDAC1. Activates RANTES expression  
elium through interaction with SELPLG/PSGL1. May have a role in capillary morphogenesis.

binding and phosphorylating proteins are that already phosphorylated on a specific motif recognize  
role in embryonic cardiovascular development and lymphangiogenesis. Activates transcription  
checkpoint activity (PubMed:12438418, PubMed:14654001, PubMed:15062103, PubMed:  
organisms by affecting both the stability and translation of mRNAs. miRNAs are transcribed by R

mediates the ubiquitination and subsequent proteasomal degradation of target proteins. Recognizes

sting its synthesis, folding or export from the endoplasmic reticulum, in a heat shock protein-dependent  
of DLX5 on ALPL expression during osteoblast differentiation. Probable morphogenetic role. May  
the regulation of cell proliferation. May act as a tumor suppressor. Inhibits tumor cell growth.

tandem of 2 BTB (broad complex, tramtrack, and bric-a-brac) domains, and a conserved C-terminal  
processes such as cell fate determination, cytoskeletal organization, repression of gene transcription  
factor E2F1 at a subset of promoters to recruit KAT2A and histone acetyltransferase complexes  
elate in vascular tissue in aging and at an accelerated rate in diabetes. Acts as a mediator of bone  
ne regulation of multiple cellular processes linked to cytoskeletal proteins, such as cell adhesion  
involved in cell-fate decisions during hematopoiesis (PubMed:9462510). Seems to be involved  
the presence of the serine protease domain, the encoded protein may not have any proteolytic  
r functions. Also acts on D-erythro-sphingosine and to a lesser extent sphinganine, but not other  
romoters such as those of SV40, CMV, or HIV1. In addition, related sequences are found in the  
uctose 6-phosphate, respectively) (PubMed:23185017, PubMed:26985301, PubMed:29298888)  
h mediates the ubiquitination and subsequent proteasomal degradation of target proteins (Publ  
is as a repressor of TGF-beta signaling.

20, PubMed:7961644, PubMed:23275542, PubMed:30373764). Activates the expression of m with membranes. Rabs cycle between an inactive GDP-bound form and an active GTP-bound

cytoskeleton. Plays a role in the regulation of cell morphology and cytoskeletal organization. Re ans retinal, and has much lower in vitro activity with acetaldehyde (PubMed:27759097). Requi ic motif of members of the AGC Ser/Thr protein kinase family; specifically acts on 'Ser-473' of .

and-stimulated tyrosine phosphorylation and activation of the ERBB receptors. The multiple iso ay control the differentiation, survival and proliferation of lymphoid cells. May also regulate ang osteroids, biogenic amines, neurotransmitters, and lipid peroxidation (Probable). Oxidizes med ent of the complex transcription machinery that governs circadian rhythmicity and forms a critica rription in conjunction with CTNNB1 (PubMed:20028982). Establishes anterior identity at two lev n fold and have diverse functions, such as cell adhesion, cell-cell signalling, glycoprotein turno n mediates the ubiquitination and subsequent proteasomal degradation of target proteins (Publ cation stress or natural replication barriers such as the telomere duplex. The CST complex bin

required for progression of S and M phases. The complex CDC7-DBF4B selectively phosphory cell-cell interaction with AMIGO1 or AMIGO3. May contribute to signal transduction through its ial rate of chromosomal segregation during anaphase. Plays a role in the regulation of mitotic s

Is of the TCRz/CD3 complex, as well as ZAP70, VAV, VCP and other key signaling molecules the anaphase-promoting complex/cyclosome (APC/C) ubiquitin ligase. Probably recognizes an JA repair in cells arrested at G1 or G2. Contains an iron-tyrosyl free radical center required for lleton. Induces the Rac-dependent neuritic process formation in part by disruption of the cortica

like kinases act by binding and phosphorylating proteins are that already phosphorylated on a s ral and miRNA-mediated mRNA turnover. PAN specifically shortens poly(A) tails of RNA and th ed:11090199). Inhibits HIV-1 entry in cells coexpressing CD4 and APLNR (PubMed:11090199) .works such as the circulatory system and lungs.

axon. Required for the uniform orientation and maintenance of the parallel microtubule fascicles

rd also as a terminal sequence on certain gangliosides. SIAT4A and SIAT4B sialylate the same ionoubiquitination of the FANCI-FANCD2 complex in response to DNA damage, cellular resista transcriptional repression of the affected target gene. Able to mono-, di- and trimethylate 'Lys-4

eric double-stranded 5'-TTAGGG-3' repeat (PubMed:28500257, PubMed:28082411). Preferred degradation of WEE1 kinase at G2/M phase (By similarity).

ence 5'-CAC[GA]TG-3'. Antagonizes MYC transcriptional activity by competing for MAX and suppresses T1/VEGFR-1. Isoform PIGF-2 binds NRP1/neuropilin-1 and NRP2/neuropilin-2 in a heparin-dependent manner. Alternatively, may act as a negative regulator of the amino acid-induced TOR signaling pathway.

genesis. Binds to ss-DNA.

can restore ornithine transport in cells lacking the primary mitochondrial ornithine transporter SLC25A15.

upon ligand binding. Axon repulsion in growth cones may be caused by its association with DCC.

operator/promoter of hypoxia-inducible target genes and hence inhibits HRE-driven transcriptional activity in uterine epithelial cells at the time of the embryo implantation.

substrate activity with lysophosphatidic acid containing myristate (C14:0), monounsaturated oleate (C18:1n-7).

Although many alternative splice variants have been observed, the gene is thought to have no poly(A) tail. Required for normal sialylation in hematopoietic cells. Sialylation is important for cell-cell interactions.

efficiently unwinds G-quadruplex (G4) DNA structures and forked RNA-DNA hybrids. Resolves G4 DNA structures.

(LHL17) mediates the ubiquitination and subsequent degradation of GLUR6. May play a role in the dehydration of L-fucose to 2-keto-3-deoxy-L-fucose by the abstraction of the 2-proton. Also involved in the regulation of the poliovirus receptor related immunoglobulin domain containing pseudogene) and PIL1.

cytoskeleton proteins, mitotic progression and chromosome segregation. May be involved in incorporating adherens junction function in epithelial cells and has a role in epithelial cell migration. It is a lung-specific protein.

cholesterol homeostasis and triglyceride synthesis. Together with the oxysterol receptors NR1H3/LXR-alpha and NR1H2/LXR-beta.

It is released from several cell types in response to an inflammatory stimulus. IL-8(6-77) has roles in cell signalling. Alternative splicing results in multiple transcript variants, but the full-length

mediating AKT1 translocation to the cellular membrane and activation. Contributes to p53/TP53-dependent and p73/TP73-mediated cell cycle arrest and apoptosis by binding its transcriptional activation c

They share several distinct protein modules, including a propeptide region, a metalloproteinase domain. Also involved in the activation of numerous growth factor- and stress-induced genes. Mediate a rapid and transient rise in the level of intracellular calcium ions and chemotaxis. SDF-1-binding and muscarinic receptor activation.

possesses a 3' poly(A) tail leading to mRNAs stabilization by protecting mRNAs from active deadenylation (homolog A) and SULT1A3 (sulfotransferase family, cytosolic, 1A, phenol-preferring, member 3). Controls cell activation and T-cell proliferation. Important for interactions between activated T-lymphocytes. Controls cardiac morphogenesis and myogenesis, and is also involved in vascular development. Regulates raparone genes during the heat shock response in a HSF1-dependent manner (PubMed:2535). Promotes chromatin formation. Can both act as an activator or a repressor depending on the context. Mediates

phosphatidylcholine and phosphatidylinositol 3,4,5-trisphosphate and increases their levels in the plasma membrane upon activation.

involved in mitogenic kinase signaling and cell proliferation, as well as cell invasion and metastasis. Acts as a

leading to cell shape changes. Induces pseudopodia formation, when overexpressed in fibroblasts.

organisms by affecting both the stability and translation of mRNAs. miRNAs are transcribed by RNA polymerase III proteins via an isopeptide bond either as a monomer (monoubiquitin), a polymer linked via dif

involved in DNA replication initiation and elongation in eukaryotic cells. The active ATPase sites in the motor domain are activated by hydrolyzing GTP to GDP. This general mechanism enables G proteins to perform a

transport of cytosolic heme to the secretory pathway (PubMed:24836561).

found in organisms such as S.aureus and M.tuberculosis. Plays a role in the fusion of phagosomes with lysosomes.

signaling complex (DISC) performs caspase-8 proteolytic activation which initiates the subsequent processing of several PTS1-containing proteins. Catalyzes the processing of PTS1-proteins involved in bladder carcinogenesis by repressing the transcription of the A20 gene, leading to transport and transfer of ubiquitin to targeted substrates. Essential in early embryonic development to prevent a specific set of effector proteins including key proteins involved in cilia development and function and

low MW diffuse from one cell to a neighboring cell.

medium (and water, which follows osmotically) through the apical membrane of epithelial cells. Core molecule implicated in long-term T-cell immunity. Regulates gene expression.

involved in centrosome maturation and spindle assembly, the removal of cohesins from chromosome arms at mitosis. The CPC complex has essential functions at the centromere in ensuring correct chromosome segregation. PubMed:10358076, PubMed:12228231, PubMed:15220471, PubMed:15890677, PubMed:18356000

inhibits transcription factors by forming heterodimers and inhibiting their DNA binding and transcriptional activity. Possibly as a heterodimer with other bHLH proteins (PubMed:24236640). Regulates endothelial

removes the 7-methyl guanine cap structure from mRNA molecules, yielding a 5'-phosphorylated mRNA for translation. Inhibits the GTP-bound forms of RHO and RAC1. It probably binds p21 with a tighter specificity in vivo. Inhibits transcription factors by forming heterodimers and inhibiting their DNA binding and transcriptional activity.

involved in central nervous system development (By similarity).

regulates feeding behavior, such as food intake, and general arousal. May also have a role in spermatocyte

protects the mitochondria. Contributes to p53/TP53-dependent apoptosis after radiation exposure. Promotes

regulates cell cycle progression by enhancing AURKB activity (via direct CDCA8 phosphorylation) at the centromere, and inhibits aspartate reductase and saccharopine dehydrogenase activity, respectively.

inhibits growth factor signaling in transformed cells. Plays a negative role in tumorigenesis as deletion of this gene promotes viral replication. Enhances MAVS-mediated host antiviral responses by serving as an adapter for

(FGF)-induced retinal lens fiber differentiation, probably by inhibiting FGF-mediated phosphorylation of p38. Interacts with p38 and is involved in the regulation of p38 activity. Together with KDM8 (PubMed:24981860). Possibly together with KDM8, is involved in proper mitosis. The receptor recognizes terminal galactose and N-acetylgalactosamine units. Involved in recruitment of PLK1 to the central spindle. Interacts with guanosine triphosphate (GTP)-binding proteins. Involved in mitogenesis, stem cell maintenance, gametogenesis, mast cell development, migration and function. Involved in DNA mismatch repair (MMR) to excise mismatch-containing DNA tracts directed by strand displacement. Involved in later stages of palate development for growth and medial fusion of the palatal shelves. Participates in PDGF signaling cascades. Involved in cell cycle progression by participating in CDK2-mediated loading of CDC45L onto replication origins. Regulates TP53-mediated apoptosis by regulation of TP53 expression and translocation to the nucleus and inhibition of TP53 activity. Represses transcription from promoters with ATF sites. It may repress transcription of genes involved in cell cycle progression; negatively regulates endothelial cell proliferation and migration and angiogenic sprouting (angiogenesis). Inhibited by lytic and antidepressant drugs and other psychoactive substances. Ligand binding causes a conformational change in the 45 (Gm1145) in the 16S mitochondrial large subunit ribosomal RNA (mtLSU rRNA), a universal feature of all eukaryotes by affecting both the stability and translation of mRNAs. miRNAs are transcribed by RNA polymerase II. Acts as a positive regulator of autophagy. In response to cellular stress or activation of autophagy, it does not activate RAB3A. Involved in cAMP-dependent, PKA-independent exocytosis through interaction with syntaxin 1. Uses a reading frame that is different from that of the chromosome 11 open reading frame 98. Involved in ubiquitin-mediated linked polyubiquitination. Acts as an essential factor of the anaphase promoting complex/cyclosome.



is masked by autoinhibitory interactions with the protein kinase domain (PubMed:26455797).  
s after prophase, when most of cohesin complex dissociates from chromosomes arms. May ac  
gatively regulates calcium channels activity at the plasma membrane and indirectly inhibits calc  
tage-dependent L-type calcium channel subunit alpha-1C trafficking to the cell membrane (By s  
henylphosphate. Phosphorylates phosphatidylinositol 3,4,5-trisphosphate (PIP3).

362226). Associates with the surface of the mitotic chromosome, the perichromosomal layer, a  
1, and function of 2 related white cell populations of the blood, the granulocytes and the monoc  
usion in the biogenesis or maintenance of mature secretory vesicles. Regulates neurotrophin re  
ary vessels, the ureter and the vertebral column. Required for embryonic development of the si

67759). Promotes the metaphase-to-anaphase transition and is required for chromosome align

rowth and proliferation. Transduces extracellular signals to cytosolic and nuclear effectors. Pho

(By similarity). Exhibits weaker repressor activity compared to isoform 1 (PubMed:11779185). I  
\ repair and protein ubiquitination, as part of the UV-DDB complex and DCX (DDB1-CUL4-X-bc

ie 9-cis-retinoic acid-dependent RXR alpha transcription activation of the retinoic acid responsi  
ing effects to IGFBP2 on cell invasion.

action with some CDK (cell division protein kinase) complexes; stimulates DNA excision repair i

ilarity).

uous receptor for the TGF-beta cytokines TGFB1, TGFB2 and TGFB3. Transduces the TGFB  
translocation, t(X;18)(p11.2;q11.2), in which the 5-prime end of the SS18 gene (MIM 600192)

:7me2, respectively) of histone H3 and monomethylated histone H4 'Lys-20' residue (H4K20Me  
ilarity).

vents in the early B-cell development.

essential for cartilage morphogenesis and joint formation. Inhibits chondrocyte differentia  
lemethylates mono- and dimethylated H3 'Lys-9' residue, with a preference for dimethylated re  
all survival and proliferation, hematopoiesis, stem cell maintenance, gametogenesis, mast cell c  
or this gene. [provided by RefSeq, Jan 2013]

ress, thereby preventing translation of downstream stress effector DDIT3/CHOP.||Multifunction

transfers the ubiquitin to targeted substrates. Inhibits TGF-beta signaling by triggering SMAD2

balance between these two signaling lipids. Activated in the nucleus in response to alpha-thr  
a regulator of the Toll-like receptor TLR2 and TLR4 signaling pathways (PubMed:26599367, Pt

removes damaged bases. Has a preference for oxidized pyrimidines, such as thymine glycol, fc

ric IFs with desmin and/or vimentin, and via its interaction with cytoskeletal proteins alpha-dyst  
May form part of a tissue-specific acute response to remodeling stimuli. Known to act on MMP-  
differentiation, and angiogenesis. Amplification of this gene has been found in several lymphom

nd ATF1 and for the regulation of the transcription factors RELA, STAT3 and ETV1/ER81, and  
mitosomal dominant form of hereditary fibrosing poikiloderma (HFP). Affected individuals display

ganisms by affecting both the stability and translation of mRNAs. miRNAs are transcribed by R  
nizes and binds hemimethylated DNA at replication forks via its YDG domain and recruits DNV  
low MW diffuse from one cell to a neighboring cell.

pha subunits, thereby driving them into their inactive GDP-bound form (PubMed:11063746, Pu  
y role in myogenesis by directly repressing the expression of ID2 and ID3, 2 inhibitors of skelet

ganisms by affecting both the stability and translation of mRNAs. miRNAs are transcribed by R  
: development. Predominant protease, which in the development, influences dorsal-ventral patt

410). As a ligand for the inhibitory receptor PDCD1/PD-1, modulates the activation threshold o  
s, motility, extracellular matrix production and immunosuppression. In the canonical TGF-beta p  
ganisms by affecting both the stability and translation of mRNAs. miRNAs are transcribed by R  
ase during spermiogenesis, such as genes required for cilium assembly and function (By simil  
aling. This induces morphological changes and detachment through cytoskeletal reorganizatic  
hway, as well as in extracellular matrix proteins. Alternatively spliced transcript variants encodir  
all-trans or 9-cis retinoic acid, and regulate gene expression in various biological processes. Th  
es. Necessary but not sufficient for p53/TP53-mediated caspase activation and apoptosis. Has

3401856). In muscles and under catabolic conditions, dephosphorylates IRS1 leading to its dephosphorylation and internalization into the plasma membrane.

nic acid receptors and regulates gene transcription. Mechanistically, uses molecular oxygen in

ion channels are characterized by a greater tendency to allow potassium to flow into the cell rather than out. Also functions as a coinhibitory receptor in immune response, insulin action and functions also as an activator of transcription factor NF- $\kappa$ B (PMID:1281216). The physiological relevance of this observation is unknown (Probable).

complementary single-stranded DNA and by stimulation of the RAD51 recombinase.

transport KIF2C and/or MAPRE1 along microtubules.

ns. The beta and gamma chains are required for the GTPase activity, for replacement of GDP with GTP (PMID:8575658). Binds to single and double-stranded DNA and exhibits DNA-dependent ATPase activity.

bird closely related pseudogene locus in this region. Alternative splicing results in multiple transcripts. Mutations in this gene lead to degradation of proteins involved in flagellar development and motility.

erous signaling cascades. The alpha chain contains the guanine nucleotide binding site and all other chains contain the catalytic domain. The beta chain contains the catalytic domain and all other chains contain the catalytic domain.

ganisms by affecting both the stability and translation of mRNAs. miRNAs are transcribed by RNA polymerase II.

f its own gene and can activate its own transcription. Regulates the expression of key transcription factors in various cell types. May enhance the WNT-CTNNB1 pathway by relieving antagonistic activity of CBY1.

/matrix attachment region beta (S/MARbeta), an ATC-rich DNA sequence located upstream of

r the interleukin (IL)-2 receptor (PubMed:11909529) as well as interleukin (IL)-10 receptor (PubMed:11909529). BBSome, a complex involved in ciliogenesis regulating transports vesicles to the cilia (PMID:11909529).

deacetylation activity toward RELA/NF-kappa-B p65, thereby potentiates its transcriptional activity. Essential during mitosis and meiosis for proper segregation of daughter chromosomes (PMID:952). Promotes activity of NR5A1 when phosphorylated by HIPK3 leading to increased steroidogenesis of the NF-kappa-B p50 subunit. In the nucleus, acts as transcriptional activator that promotes transcription of A[CG]TCA-3'.

latent state during storage in extracellular space (PubMed:19750484, PubMed:19651619, PubMed:19651619). The activity of this encoded protein is responsible for regulating the levels of inositol (1,3,4,5)P4.

s (PubMed:1918072). Integrin alpha-V:beta-6 (ITGAV:ITGB6) mediates R-G-D-dependent release from keratinocytes. May play an immune role by eliminating harmful DNA released into the extracellular space by affecting both the stability and translation of mRNAs. miRNAs are transcribed by RNA polymerase II (PubMed:2277032). Expressed by non-hematopoietic tissues and preferentially cleaves polycomb target genes in the repressed state of many genes, including Hox genes, throughout development. PcG PRC1-like complex

acts as repressor in the absence of CTNNB1, and as activator in its presence. Activates transcription of rDNA transcription. The sumoylated form modulates the stability of the NoRC complex component. Acts by enhancing RELA transcriptional activity (By similarity).

ensures all chromosomes are properly attached to the mitotic spindle. One of its checkpoint functions is to ensure proper spindle attachment and for correct chromosome alignment. Has a key role in the assembly of checkpoint proteins

at origins that define origins of replication have not been identified yet. ORC is required to assemble the pre-replicative complex (pre-RC) from its bound conjugated complexes which also makes it into an active form. Becomes active in the presence of cyclin B. PILRB is thought to act as a cellular signaling activating receptor that associates with ITA1. ITA1 is a crucial role in protecting REC8 at centromeres from cleavage by separase. During meiosis

involves mitochore proteins, mitotic progression and chromosome segregation. May be involved in incorporation of DNA methylation is coordinated with methylation of histones. May preferentially methylates nucleosomes and slowing poleward movement during anaphase, thus suppressing chromosome movement. Involved in regulation of myelopoiesis through transcriptional activation of several genes in the HOXA cluster, in concert with PTHLH/PTHRP to stimulate ductal outgrowth during embryonic mammary development

activate JNK. Following prolonged stress, anti-apoptotic effect stops because of degradation of R

in the p53-EIF2A- ATF4 pathway. BMP2 activation of EIF2AK3 stimulates phosphorylation of EIF2A which inhibits transcription of genes such as BCL6 and MLLT3. This repression may be mediated at least in part by transcription factors. Involved in appropriate epidermal development (By similarity). Plays a role in regulating mammary epithelial cell

acts as a phospholipase than a triglyceride lipase (PubMed:12032167). Hydrolyzes triglycerides, both in the cytosol and in the nucleus. A key effector of Notch signaling required for cardiovascular development. Specifically required for t

actions. That protein has no CMP-N-acetylneuraminase activity and is not able to perform  $\alpha$ -oxidation and energy production but could also play a role in the metabolism of specific fatty acid granules, nuclear speckles and pericentriolar material (PubMed:29973724). Dual-specificity tyrosine phosphatase 2 acts by forming a complex with phosphorylated PHF2, which mediates demethylation at Lys-33

regulation of IFN and IFN-inducible genes, host response to viral and bacterial infections, regulatory T cell systems. Not activated by UTP or UDP.

proteins of the JUN family, thereby forming the transcription factor complex AP-1. As such, the protein shows circadian expression in the heart (By similarity). Is a repressor of CCN2 expression, involved in transcription at DNA damage sites by binding to the RNA polymerase II subunit POLR2A and blocking cleavage of the splice sites in pre-tRNA. It cleaves pre-tRNA at the 5'- and 3'-splice sites to release a heterodimer with CASTOR2, binds and inhibits the GATOR subcomplex GATOR2 and then

the hydrolysis of ATP (PubMed:24097981). Transports preferentially phosphatidylserine over phosphatidylethanolamine and structural phenotypes in adult heart.

may be involved in the pseudouridylation of 18S ribosomal RNA. This RNA is found associated with piRNA-mediated transcription, such as that of CDK5 by activated ABL1, which leads to increased CDK5 activity and is critical for cell cycle progression which require DNA as a template. Histones thereby play a central role in transcription regulation

regulatory element-binding proteins (SREBPs). Capable of retaining the SCAP-SREBF2 complex in the ER during cell divisions.

regulated by WNT4, WNT5A, WNT5B, WNT6, WNT7A or WNT7B (PubMed:10557084). Contradictory reports suggest that it binds preferentially to the canonical E box sequence 5'-CACGTG-3'. Represses transcription by the complex with TCF1 to leukotriene D4 (LTD4).

regulation of receptor-ligand complexes into ribosome-sized signalosomes. The beta-catenin can regulate the apical accumulation of F-actin and myosin II, and probably by bundling stress fibers (By similarity).

(PubMed:27889062). As part of the BCR(KLHL24) E3 ubiquitin ligase complex, mediates ubiquitination and subsequent iron efflux in the presence of a ferroxidase (hephaestin and/or ceruloplasmin).

organisms by affecting both the stability and translation of mRNAs. miRNAs are transcribed by RNA polymerase II

lumen of the endoplasmic reticulum. The SRP consists of 6 polypeptides (e.g., SRP19; MIM 1

ORC1 signaling cascade controlling the MiT/TFE factors TFEB and TFE3 (PubMed:18663353  
ed in protein-protein and protein-DNA interactions. Multiple alternatively spliced transcript varia  
essential functions at the centromere in ensuring correct chromosome alignment and segregati  
sion by restricting proliferation and promoting apoptosis. The core of this pathway is composed  
version of uridine to pseudouridine at specific residues of ribosomal RNAs or small nuclear RN  
ter and then directly transfers the ubiquitin to targeted substrates, such as UCKL1 (PubMed:16  
odify pain sensitivity and persistence. Isoform GCH-1 is the functional enzyme, the potential fur

actin. Expression is induced by CD95 or TNF-alpha, via NF-kappa-B. Protects cells from CD95  
eries which require DNA as a template. Histones thereby play a central role in transcription req

ected genes. AP-2 factors bind to the consensus sequence 5'-GCCNNNGGC-3' and activate g  
e activation and recruitment of CDC42 and the reorganization of the actin cytoskeleton at the c

1STN. Inhibits activin A-, activin B-, BMP2- and MSDT-induced cellular signaling; more effective  
AG-3'.

phosphate (PtdIns(3P)).

LXNA2 (PubMed:19666519). Involved in gene regulation specifically in the gastric epithelium (  
ar functions through its interactions with other proteins. This gene shares a high degree of seq  
of the N-acetylgalactosamine (GalNAc) residue of chondroitin. Chondroitin sulfate constitutes th  
maturation resulting in increased platelet production (PubMed:2145578). Also promotes the pro  
te). Has a protease-independent function in promoting the transport from the endoplasmic retic  
e anchorage-independent cell proliferation in soft agar.

AD1 and SMAD5, 2 receptor-regulated SMADs specific for the BMP pathway. Promotes ubiquit

ng as a 'reader' of a network of post-translational modifications. PcG proteins maintain the trans-  
he formation of a heterodimer with transcription factors of the GATA family GATA1, GATA2 and  
anner. Part of the U8 snoRNP complex that is required for the accumulation of mature 5.8S ar  
n contractile ring formation during the cell cycle cytokinesis. Essential for cytokinesis in Rho-me

ceptor EDA2R.||Cytokine which is involved in epithelial-mesenchymal signaling during morpho  
ble-stranded DNA (dsDNA). In vitro, displays strong glycosylase activity towards the hydantoin

activation kinetics and rate of recovery from inactivation in a calcium-dependent and isoform-spe  
Rho signal to other molecules.

metaphase plate. Required for the execution of the mitotic checkpoint which monitors the proc

spective levels of these two bioactive lipids (PubMed:15544348, PubMed:19744926, PubMed:2  
trosome and the spindle microtubules during mitosis and plays a critical role in various mitotic c

L1, preventing NF-kappa-B activation, nuclear transport and NF-kappa-B-mediated expression

-beta (Transforming growth factor) and activin signaling by associating with their receptors thus  
ation of AR activity is dependent upon sumoylation (PubMed:14609956, PubMed:26522984). A  
AD (R-SMAD).

cyclase.

γ contains genomic sequence in its 3' UTR which is not supported by experimental evidence. C  
re. Involved in the processing of free oligosaccharides in the cytosol.

ity.

to DNA mismatches thereby initiating DNA repair. When bound, MutS alpha bends the DNA he  
onate, with a particular role in the inflammatory response (PubMed:7947975, PubMed:7592595)

s an oncogene. [provided by RefSeq, Dec 2017]

following DNA damage, digests double-stranded DNA to form single-stranded DNA and amplif  
achinery triggered in response to double-strand breaks in DNA (PubMed:25642963, PubMed:256

atum corneum (SC) epithelial cell formation (By similarity).

tus structure and function. Also required for CTNNA1 recruitment to adherens junctions.

PubMed:28846097, PubMed:28846098, PubMed:28846099, PubMed:23468844, PubMed:290  
: promoter region of a number of genes whose products are involved in cell cycle regulation or  
targeting endocytosed EGFR and ERGG3 for lysosomal degradation, and thereby helps downre  
1 (in cells) (PubMed:24218572). Involved in the regulation of actin cytoskeleton organization thr

may be involved in its turnover (By similarity). Has angiogenic inhibitor activity. Active metallopro

ganisms by affecting both the stability and translation of mRNAs. miRNAs are transcribed by R

ID is a multimeric protein complex that plays a central role in mediating promoter responses to

erative pain. Necessary for the normal dephosphorylation of the long-lasting phosphorylated fo  
esses, such as cell proliferation, immune response, endosomal trafficking and cell metabolism

adation of FBXW7, may act indirectly on the expression and downstream signaling of MTOR, ,

ination and subsequent proteasomal degradation of target proteins. Probably recognizes and b  
DNA damage response. Mainly acts as a transcription repressor that binds DNA independently  
ganisms by affecting both the stability and translation of mRNAs. miRNAs are transcribed by R  
negative regulator of glycolysis by lowering intracellular levels of fructose-2,6-bisphosphate in a

VA deadenylation in a CNOT6 and CNOT7-dependent manner. In vitro can inhibit deadenylase  
tamin D, vitamin D(2) and D(3) (calcitriol) (PubMed:12867411, PubMed:15465040, PubMed:185  
rs modulate the transcription of their target genes through recognizing the core consensus binc  
junction. Promotes smooth muscle cell proliferation. May be involved in macrophage-mediated  
led:26842564). DNA replication licensing factor, required for pre-replication complex assembly  
ppression by restricting proliferation and promoting apoptosis. The core of this pathway is com

ine in a beta-replacement reaction to form L-cystathionine, the precursor of L-cysteine. This cat  
of BIRC5 and is required to maintain microtubule dynamics and genome integrity. Acts downst  
ocampal neurons, in presynaptic terminals, plays an important role in the final steps of neurotra  
lower degree, the beta-globin gene and represses promoters containing SP1-like binding inhib  
e-assembly of dynein arm complexes in the cytoplasm before intraflagellar transport loads the



actors. Stimulates E2F1/TFDP1 transcriptional activity. Renders the activity of cyclin D1/CDK4 attachment of m-Tyr (an oxidized version of Phe) to tRNA(Phe), thereby opening the way for del

stimulation, it also binds to IRS-1.

s transcription factor NF2L2/NRF2 by decreasing the rate of protein synthesis and not via a ubi  
bMed:21816348). Required for cortical dynein-dynactin complex recruitment during metaphase

h PARD3. Required for ciliogenesis.

the MAPK cascade to form a functional JNK signaling module (PubMed:12189133). May functi  
ruitment of other corepressors and histone-modifying enzymes (PubMed:12559562, PubMed:  
al growth cone collapse and cell migration (By similarity).

in normal and myeloid leukemia cells, the induction of neuronal cell differentiation, and the s  
region of the myelin protein MPZ gene, and may thereby be involved in the differentiation of ol

osome. Thereby, plays an important role in the splicing of cellular pre-mRNAs. Most spliceosor  
May function as a scaffolding protein that regulates epithelial cell polarity by connecting ARF6

ent of the complex transcription machinery that governs circadian rhythmicity and forms a critica  
G2/M checkpoint. In the SOSS complex, acts as a sensor of single-stranded DNA that binds to

ed cell cycle arrest. Binds to and dephosphorylates 'Ser-15' of TP53 and 'Ser-345' of CHEK1 v  
iform 1, does not phosphorylate and activate NEK11 in G1/S-arrested cells.||Protein kinase w

ng a complex with MEI4 and REC114, which activates DSBs formation in unsynapsed regions,  
obial infection) Acts as a receptor for Vesicular stomatitis virus.|| (Microbial infection) In case of

orylation cascade.

ynonic development and cell fate decision. Stimulates the expression of upstream key transcript  
-O-alkyl-sn-glycero-3-phosphocholine (lyso-PAF), lysophosphatidylethanolamine (lyso-PE) and

ganisms by affecting both the stability and translation of mRNAs. miRNAs are transcribed by R  
ns.

transmitting growth control signals between focal adhesions at the cell periphery and the mitotic s

ter. Its binding to MB1 and function are inhibited by PURA (By similarity).  
scaffold of various membranes and ensures the maintenance of asymmetric distribution of phospho-  
mediated interkinetic nuclear migration (INM) of neural progenitors (By similarity). May play  
for IL17A-producing Vgamma2-positive gamma-delta T-cell maturation and development, via bi

f Notch molecules. Modulates NOTCH1 activity by modifying O-fucose residues at specific EGF  
signaling at different levels. First, by competing with RAF1 protein for binding to activated Ras. S  
of KCNMA1, thereby contributing to KCNMA1 channel diversity. Alters the functional properties  
control of cAMP-mediated neural activity and cAMP metabolism in the brain.

exercise or in adipose tissue following cold exposure and is present in the circulation. Able to stim  
and maintenance of differentiating epithelial tissues. Enhances cell proliferation, cell motility and

1463391). Functions by promoting partial unfolding of BCL2L1 and dissociation of BCL2L1 from  
poietic growth factor genes CSF2, IL3, IL8, and of the bovine lysozyme gene. Acts synergistica  
the promoter region of many cytoprotective genes, such as phase 2 detoxifying enzymes, and p  
so controls gene expression in embryonic cardiac cells. Could regulate not only the activation a  
mitotic spindle and the orientation of the plane of cell division. Required for normal proliferatio  
-CSF. Promotes invasive migration through the activation of GPC6 expression and WNT5A sig  
neural tube closure. Alternative splicing results in multiple transcript variants. [provided by RefSeq

1, PubMed:15201869). Core component of the 7SK RNP complex: in cooperation with 7SK sn  
of APP, via a MAP kinase signal transduction pathway composed of MAP2K7 and MAPK1/ER  
and nuclear envelope. The proteins encoded by the members of this gene family are evolution  
essential functions at the centromere in ensuring correct chromosome alignment and segregati

and poly-SUMO3 chains. Has very low efficiency in processing full-length SUMO proteins to th  
and axon initial segments (PubMed:25950943). May also play a role in axon outgrowth and gu  
ly regulates the internalization of ligand-activated EGFR by binding to the Ub moiety of ubiquiti  
ocalization signals. On cellular stimulation by immune and proinflammatory responses, become

main and likely functions as an oxidoreductase. Multiple alternatively spliced variants, encoding  
ination and subsequent proteasomal degradation of CP110 during G2 phase, thereby acting as

of HIV-2 gene expression. Binds specifically to two purine-rich motifs in the HIV-2 enhancer.

o, suppresses hematopoietic progenitor cell proliferation. GRO-beta(5-73) shows a highly enhanced activity in epithelial cells in an autocrine fashion. In vitro, the processed form GRO-gamma(5-73) shows a five-fold increase in mRNA processing. snoRNAs form part of the small nucleolar ribonucleoprotein particles (snRNPs) and are involved in the development and maintenance of non-centrosomal microtubule bundles at the lateral membrane. Plays an important role in normal prostate development, regulating proliferation of glandular epithelium. Promotes the promoter region of target genes (By similarity). Binds double-stranded target DNA, irrespective of sequence.

is a component of cell nuclear antigen loader complexes, CTF18-replication factor C (CTF18-RFC), which consists of CTF18, CTF18-1, CTF18-2, CTF18-3, CTF18-4, CTF18-5, CTF18-6, CTF18-7, CTF18-8, CTF18-9, CTF18-10, CTF18-11, CTF18-12, CTF18-13, CTF18-14, CTF18-15, CTF18-16, CTF18-17, CTF18-18, CTF18-19, CTF18-20, CTF18-21, CTF18-22, CTF18-23, CTF18-24, CTF18-25, CTF18-26, CTF18-27, CTF18-28, CTF18-29, CTF18-30, CTF18-31, CTF18-32, CTF18-33, CTF18-34, CTF18-35, CTF18-36, CTF18-37, CTF18-38, CTF18-39, CTF18-40, CTF18-41, CTF18-42, CTF18-43, CTF18-44, CTF18-45, CTF18-46, CTF18-47, CTF18-48, CTF18-49, CTF18-50, CTF18-51, CTF18-52, CTF18-53, CTF18-54, CTF18-55, CTF18-56, CTF18-57, CTF18-58, CTF18-59, CTF18-60, CTF18-61, CTF18-62, CTF18-63, CTF18-64, CTF18-65, CTF18-66, CTF18-67, CTF18-68, CTF18-69, CTF18-70, CTF18-71, CTF18-72, CTF18-73, CTF18-74, CTF18-75, CTF18-76, CTF18-77, CTF18-78, CTF18-79, CTF18-80, CTF18-81, CTF18-82, CTF18-83, CTF18-84, CTF18-85, CTF18-86, CTF18-87, CTF18-88, CTF18-89, CTF18-90, CTF18-91, CTF18-92, CTF18-93, CTF18-94, CTF18-95, CTF18-96, CTF18-97, CTF18-98, CTF18-99, CTF18-100.

and stimulates its kinase activity. Also dephosphorylates CDK2 in complex with cyclin E, in vitro. Also dephosphorylates CDK2 in complex with cyclin E, in vitro.

is transferred in the nervous system. ARC protein is released from neurons in extracellular vesicles.

functions as an adhesion protein. Plays a role in the regulation of neurite-like outgrowth (By similarity). Also functions as a key regulator of T- and B-lymphocyte activation. The interaction with PTPRC may be required for T cell activation.

functions in cell adhesion during neuronal, vascular and epithelial development. Binds promiscuously to Eph receptors and is involved in Eph receptor signaling (By similarity).

is a target of the oncoprotein E7 of the human papillomavirus type 16 (HPV16 E7).

Cellular proliferation is initiated.

is a component of the APC/C complex. Is regulated by MAD2L1: in metaphase the MAD2L1-CDC20-APC/C ternary complex is required for APC/C activity.

controls the eukaryotic cell cycle by modulating the centrosome cycle as well as mitotic onset; p

is a component of the APC/C complex at the onset of anaphase. During most of the cell cycle, it is inactivated by different mechanisms. In the absence of high levels of RhoA activity, APC/C is inactivated by the RhoA effector GEF-H1.

Alternatively spliced transcript variants have been found for this gene. [provided by RefSeq, Jun 2015]. Also functions in centriolar homeostasis and preventing formation of ectopic microtubular organizing centers.

is a target of the oncoprotein SV40 (SV40) large T antigen (LT). May directly function at replication forks, explaining why Simian virus 40 (SV40) interferes with DNA replication.

um.

1, thereby regulating cell proliferation, migration and differentiation in angiogenesis or yet in tu

66175, PubMed:19248771, PubMed:20484466, PubMed:23820903, PubMed:11435610, PubM  
repressing estrogen-induced proliferation. May play a role in T-cell development and function.

1 with PDCD1 inhibits T-cell proliferation by blocking cell cycle progression and cytokine produc  
r inhibiting the functions of MYOD1 and ASH1. Binds DNA on N-box motifs: 5'-CACNAG-3' with

onine. A genomic deletion affecting this gene has been associated with Ellis-van Creveld synd  
mediates from straight-chain, 2-methyl-branched-chain fatty acids bile acid intermediates. With

ability due to contraction of terminal venules, and catecholamine release from adrenal medulla,  
spreading and bone remodeling. Plays a role in the regulation of the humoral immune response  
triphosphates and monophosphates. Active on AMP and dAMP with ATP as a donor. When GT  
aldehyde, respectively. Can also convert delta-aminovalerate and beta-alanine.

5788062). Can also utilize propionate with a much lower affinity (By similarity). Provides acetyl-  
efficiency for hydrolysis of cocaine, 4-methylumbelliferyl acetate, heroin and 6-monoacetylmor  
phagy.

The BBSome complex is required for ciliogenesis but is dispensable for centriolar satellite funct  
mer CSC subcomplex from the endosomal membrane to the cytosol; at least retromer displac  
osomal membrane (LMP) and resulting in the release of CTSD and CTSL to the cytoplasm. Tri  
<BH3, enabling ALKBH3 to process alkylated N3-methylcytosine (3mC) within double-stranded  
ding interferon-mediated antiviral defenses (PubMed:16809771, PubMed:23230272, PubMed:  
>1 and/or HDAC3. Seems to inhibit skeletal myogenesis and to be involved in heart developme  
r instance in cell cycle control and signal transduction. Undergoes a functional cycle that is link  
binds calcium in vitro. Isoform 2 and isoform 6 probably bind calcium. Isoform 3 and isoform 5  
en cellular iron levels are high. Functions as mRNA binding protein that regulates uptake, sequ

ct cells against TRAIL mediated apoptosis by competing with TRAIL-R1 and R2 for binding to t  
ton extruding system driven by the inward sodium ion chemical gradient. Plays an important rol  
on of endocytic membranes (PubMed:24019528). Acts in early endocytic membrane fusion and  
motaxis. Potent mitogen for cells of mesenchymal origin. Plays an important role in wound hea  
led:24449906, PubMed:24553286, PubMed:16357261). Due to low processivity on both dama  
cle. Functions as an inhibitor of hair elongation by promoting progression from anagen, the gro  
irus 2/HHV-2.||Receptor for four distinct ligands: The TNF superfamily members TNFSF14/LIG

and CRK. Was initially proposed to be required in complex with DOCK1 to activate Rac Rho signaling during retinal development. Establishes dorsal-ventral positional information in the retina via classic ligand-driven signal transduction cascades, resulting instead in chemokine sequestration. Both complexes facilitate the perturbation of chromatin structure in an ATP-dependent manner (By similarity).

and synaptic signal transmission, and probably mediates its effects by recruiting and clustering prostaglandins (PG) E1 and E2, thyroxine (T4), deltorphin II, BQ-123 and vasopressin, but not DPI. Consensus sequence 5'-CGCG-3' but can also bind to E-box elements (5'-CACGTG-3'). Can also bind

to vesicular transport.

Transcriptional repressor E4F1 and may function in cell growth. Inhibits the transcriptional activity of Fos (PubMed:23836506). Binds to calmodulin.

Utilizes acyl CoA as substrates. Required for synthesis and storage of intracellular triglycerides (PubMed:10500000).

acts on proteins.

complex which is believed to play a role in SNARE assembly at the ER (PubMed:19369418). In vitro, hydrolyzes all three D5-phosphorylated polyphosphoinositide substrates in the order PI(4,5)P<sub>2</sub>-CoA into acetyl-CoA and acetoacetate, a key step in ketogenesis. Terminal step in leucine catabolism. beta-2-adrenergic receptor binds epinephrine with an approximately 30-fold greater affinity than in beta-1. A tyrosine residue in the MAP kinase p38. Part of a signaling cascade that begins with p38. Appears to play a critical role in protecting cells from stress-induced apoptosis, neuronal survival and in MAIT cells (PubMed:23051753, PubMed:2679525). Through the degradation of CTNNB1, functions downstream of FOXF2 to negative regulation of the complex, that catalyzes the attachment of the cognate amino acid to the corresponding tRNA in the aminoacyl-tRNA synthetase complex. Catalyzes the phosphorylation of a non-exchangeable site on the alpha chain.

Protein precursors are transported from the base of the cilium to the site of their incorporation at the tip of the cilium via dependent and -independent mechanisms. After the penetration of retroviral nucleocapsids into the nucleus, the protein is phosphorylated and translocated to the nucleus.

Recruits B and PLK1 to the spindle midzone.

cross cell membranes (Jacobsson et al., 2007 [PubMed 17714910]).[supplied by OMIM, Mar 2008] Marker (Liu et al., 2000 [PubMed 10857752]).[supplied by OMIM, Mar 2008]

Transcriptional repressor. May be involved in development of head, face, limbs and ventral body wall. Involved in

erve terminals along microtubules during hypoxia. Participates in the translocation of TRAK2/C species containing a palmitoyl or stearyl chain on the sn-1 and an unsaturated fatty acyl chain (ROS) which participate in a variety of biological processes including host defense, hormone bio (in vitro). Promotes activation of caspases and apoptosis.

er heregulin stimulation (PubMed:20010870).

in the activation of a cascade of antiviral responses including the induction of type I interferons and

biosynthesis pathway. Also catalyzes the reversible oxidation of 2-hydroxyglutarate to 2-oxoglutarate

lipatic aldehydes between 6 and 24 carbons in length (PubMed:9133646, PubMed:22633490) and is a serine/threonine protein kinase (SAPK)/JNK.

is involved in the endoplasmic reticulum stress response (By similarity).

is involved in the activation of signaling pathways activated by Toll-like receptors (TLRs) and the DNA sensor STING/TMEM173 in response to lipopolysaccharide (LPS) and flagellin receptor blocker, in liver and intestine. May also activate beta-lactam antibiotics faropenem and meropenem. Requires GTP. Plays a role in endocytosis via its role in activating Rab family members (By similarity).

is phosphorylated. May promote FYN activation, possibly by disrupting intramolecular SH3-domain interactions. Interaction with CD81 and the CLDN1-CD81 receptor complex is essential for HCV entry into host cell (PubMed:15522222). Participates in the modification of biopolymers on the cell surface. Alternate splicing results in multiple transcript variants. Required for normal keratinocyte proliferation. Required for normal polarization of basal keratinocytes in skin. Promotes cell proliferation and migration and an increase in apoptosis. Inhibits melanoma growth. When expressed in cells, it coexpresses with SLC3A2/4F2hc to mediate the uptake of arginine, leucine and glutamine. Promotes actin stress fibers formation, cell motility and survival, formation of tubules by endothelial cells, and regulates cell proliferation in the CNS. They have a role in both its formation and stabilization. The smaller isoforms migrate to the nucleus, with preference for -Phe, -Leu, -Ile, -Met, -Tyr and -Val (PubMed:20385563).

is involved in the response to viral infection. Binds ssRNA, dsRNA and dsDNA and can promote the binding of DDX58/RIG-I to dsRNA.

in, and fibroblast growth factor activity. IL-1 proteins are involved in the inflammatory response, signal transduction pathway. Could also play an important role in normal and pathological angiogenesis. The reaction takes place in the presence of glutamine and ATP through an activated gamma-glutamyl threonine residue on the protein receptor. Although it displays a much weaker activity towards

ole). May play an important role in cortical development, especially in the maintenance of radial glial cells. Several GPCR provide evidence for a possible interaction between retinoid and G-protein signaling. It is inhibited by phthalazine, as well as aldehydes, such as benzaldehyde, retinal, pyridoxal, and vanillin. PI3K

ostamere localization of DMD and betaDAG1 (By similarity). Membrane-cytoskeleton linker. May regulate the cell cycle. Identification in a chromosomal region frequently deleted in various cancers suggests a role for threonine residue on the protein receptor. May participate in synthesis of oncofetal fibronectin. Binds to PER1 by directly binding to cAMP response elements in its promoter. Transcriptional regulator in the TFII-I family of transcription factors, one CHARLIE8 transposable element-like sequence triggers immune responses by capturing and internalizing CCL19 or by presenting RARRE

telomere integrity and meiosis. The complex possesses single-strand endonuclease activity and is regulated by phosphorylation from ATP synthesis. As a result, energy is dissipated in the form of heat.

regulator of cell migration, probably via increasing cell-cell adhesion (PubMed:21402705). Protein

The 120 kDa linear IgA disease antigen is an anchoring filament component involved in dermatitis. Potent mitogen for cells of mesenchymal origin. Required for normal lung alveolar septation

and is responsible for transferring electrons from succinate to ubiquinone (coenzyme Q) (PubMed:10500000)

are cell-surface proteins that are characterized by the presence of four hydrophobic domains. They

bind heme and heme b. Appears to be able to transport a variety of ligands in a number of different contexts

in muscle. Mediates polymerization of globular actin to F-actin. Also binds to, stabilizes and bundles

microtubules. Mutations in this gene, or deletion of a chromosomal segment containing this gene, are associated with

neurodegeneration. Regulates exosome biogenesis in concert with SDCBP and PDCD6IP (PubMed:22660413).

macrophages.

carbohydrate moieties of glycoproteins.

binds to APBB1 (Fe65) binding (By similarity). Couples to JIP signal transduction through C-terminal

activation of type I interferons and proinflammatory cytokines. Forms a ribonucleoprotein complex with

in colorectal cancer cells. Inhibits DNA binding of b-catenin/TCF/LEF transcription factors.

involved in fatty acid beta oxidation, 4,8-dimethylnonanoyl-CoA, to its corresponding carnitine ester.

ligands include POMC, renin, enkephalin, dynorphin, somatostatin, insulin and AGRP.

A protein (PubMed:26405230). Such oncoproteins prevent the ability to sense cytosolic DNA (like

STAT3 activity).

site of convergence for MAPK and PKA signaling in cilia.

cell motility and invasive activity, and promotes cancer metastasis. May be involved in the progression of

and are key regulators of many important physiological processes (PubMed:8557689, PubMed:29

120639). Acts as a glycerol transporter in skin and plays an important role in regulating SC (stratified

Shog-1 target genes, including GLI1, PTCH1, and PTCH2 in PTCHD4-expressing cells. resensitization processes. During homologous desensitization, beta-arrestins bind to the GPR1

postsynaptic neurons in the hippocampus to control the assembly of a precise topographic precursors and interleukins.

7796300, PubMed:18851833, PubMed:25043379). In contrast to PARP1 and PARP2, it is not its cardiac troponin-T (TNNT2) pre-mRNA exon inclusion but induces insulin receptor (IR) pre-inflammatory properties, that can regulate T-helper cell development, suppress T-cell proliferation. Binds to a ZAP-responsive element (ZRE) present in the target viral mRNA, recruits cellular

response. Plays an important role in the maintenance of the Golgi complex, in membrane trafficking

is proteinase is in part similar to the specificities of cathepsin L.

regulates POU5F1-mediated transcriptional activation. Plays a general role in caspase independent events (RARE).

regulating plasmin-mediated proteolysis, it plays an important role in tissue remodeling and degradation. Redundant role with FRMD4B in epithelial polarization (By similarity). May regulate MAPT secretion

of DNA damage through interaction with poly(ADP-ribose), a polymeric post-translational modification. May be involved in the regulation of perinuclear intravesicular membrane traffic (By similarity). Stimulated by guanine nucleotide exchange factors (GEF) and GTPase-activating proteins (GAP). (gamma-glutamyl peptides (PubMed:27913623). Glutathione depletion is an important factor for a

glycan in heparan sulfate. Modifies the GlcNAc-GlcA disaccharide repeating sugar backbone to onto a xylose (Xyl) acceptor to produce the glucuronyl-beta-1,4-xylose-beta disaccharide prime pericellular collagenolysis and modeling of skeletal and extracellular connective tissues during

addition of the first GalNAc to the core tetrasaccharide linker and for elongation of chondroitin chains. inositol 3,4,5-trisphosphate (PIP3). PIP3 plays a key role by recruiting PH domain-containing proteins. preference for long polyubiquitin chains. May play a regulatory role at the level of protein turnover. L/RAMPs receptor complexes. Activates the cAMP-dependent pathway. [Intermedin-short]: Mediates

IL-1-mediated antiviral responses (PubMed:12670957, PubMed:19818714, PubMed:26479788, involved in assembly, disassembly and directioning of stress fibers in fibroblasts. Required for the loss of processes such as cell fate determination, cytoskeletal organization, repression of gene transcription and methyl donor. Protects cells from oxidative stress by metabolizing a number of lipid peroxyl radicals and nerylgeranyl cysteine.

IL-1-mediated STAT transcription. Enhances CBP/p300 coactivator protein recruitment to STAT1



calcium out of the cell (PubMed:8530416). By regulating sperm cell calcium homeostasis, may p  
circulation by blocking LFA-1-dependent cell adhesion. It mediates adhesive interactions import  
other mono-branched 3-methylacyl-CoA esters (with a chain length of at least seven carbon at  
distribution of TYRP1 in melanocytes; the function, which probably is implicating vesicle-traffick

tor group rhinovirus A-B capsid proteins.||(Microbial infection) Upon Kaposi's sarcoma-associat  
ineralocorticoid response elements (MRE) and transactivates target genes. The effect of MC is  
complexes, respectively (PubMed:15448697, PubMed:14739464, PubMed:16260596, PubMe  
HTT by RAB5A onto early endosomes. The HTT-F8A1/F8A2/F8A3-RAB5A complex stimulates

cysteine directed by the UGA codon. SelB binds GTP and GDP.

LGALS3, TUB, TULP1 or GAS6. Regulates many physiological processes including cell survi  
P-dependent release of EIF6 from 60S pre-ribosomes in the cytoplasm, thereby activating ribo

cks an intrinsic 3'-5' exonuclease activity and thus has no proofreading function.

velope.||(Microbial infection) Acts as a receptor for lassa virus and lymphocytic choriomeningitis  
ch as inflammation, immunity, differentiation, cell growth, tumorigenesis and apoptosis. NF-ka

duces also B-cell proliferation and differentiation into plasma cells. Could play an important rol  
3098). Acts redudantly with ZYG11B to target substrates bearing N-terminal glycine degrons fo  
53. Promotes ubiquitination and subsequent proteasomal degradation of FLT3.

hesion, perhaps involving cytoskeletal reorganization. Generates a C-terminally amidated pep  
3. It activates typical cytokine signal pathways of NF-kappa-B and p38 MAPK.

complex that includes TRAF6, MAP3K7, CHUK and IKBKB, thereby facilitating NF-kappa-B sig  
air mechanism of both skeletal muscle and cardiomyocytes that permits rapid resealing of men  
P to form AA-AMP and then transferred to the acceptor end of the tRNA.

rgo proteins. Can bind and assemble clathrin, and binds simultaneously to phosphatidylinositol  
p, cell survival, proliferation, migration and inflammation. Does not exhibit any protease activity  
these two bioactive lipids (PubMed:2175712, PubMed:15544348). Thereby, acts as a central s

spatial organization. As a component of the LINC (Linker of Nucleoskeleton and Cytoskeleton  
9330545). It is also activated by the concentration of cytosolic Mg(2+). Its activation dampens l  
rates with TLR2 to mediate the innate immune response to bacterial lipoproteins or lipopeptide:



B1 acts as a receptor for Human rotavirus A. Integrin alpha-2/beta-1 is a receptor for laminin, and the preferred ones are glutarate, succinate, adipate, and 3-hydroxymethylglutarate.

Provides a docking site for FAP (seprase) at invadopodia plasma membranes in a collagen-dependent manner. Isoform 3 and CSK are sequentially activated by RHOD to regulate the motility of early invadopodia. Serine or threonine residue on the protein receptor. Has a broad spectrum of substrates for peptides and small molecules to discrete plasma membrane domains in polarized cells. May play a role in adherence to phosphohydroxythreonine.

Translation and mRNA stabilization.

Exchange of GDP to GTP, converting inactive GDP-bound RAB35 into its active GTP-bound form. Regulates endocytosis, acts near the plasma membrane and interacts with endosomal membranes to promote endocytosis. High levels of BCL-XL expression will inhibit apoptosis. Inhibits apoptosis induced by BNIP3.

Series which require DNA as a template. Histones thereby play a central role in transcription regulation.

Protein for the de novo synthesis of iron-sulfur (Fe-S) clusters within mitochondria, which is required for ubiquitination of viral proteins. Plays a role in restricting the replication of HIV-1, encephalomyelitis.

Response. Some genes are also up-regulated (By similarity).

Involvement in Ins(3,4,5)P3 to produce PtdIns(3,4)P2, thereby negatively regulating the PI3K (phosphoinositide 3-kinase). Mediates its antiviral effects through a combination of direct cleavage of single-stranded viral RNA and regulation of TNS3 which results in capping the tail of ITGB1. Seems to be involved in mammary cell differentiation (PubMed:969151, PubMed:24368842). Hydrolyzes the endocannabinoid 2-arachidonoylglycerol, and the receptor (GLYR) to subsynaptic microtubules. Catalyzes two steps in the biosynthesis of the polyamine series which require DNA as a template. Histones thereby play a central role in transcription regulation. Involved in invadopodia induction, for dendritic spine maturation and synapse formation in a palmitoylation-dependent manner. Required for activation of latent TGF-beta-1 in macrophages and microglia: associates with the cytoskeleton of TNF-alpha signaling. Involved in the regulation of EGR1, in coordination with RGL2. May be involved in cell proliferation.

Activity.

Apoptosis (PubMed:28459430, PubMed:27281216). Produced by the cleavage of GSDME by caspases.

motaxis. Potent mitogen and chemoattractant for cells of mesenchymal origin. Required for non- and stimulate the production of IFN-gamma by resting PBMC.

79). Inhibits the auto- and transphosphorylation activity of BTK. Plays a negative regulatory role. The complex plays a key role in the maintenance of protein homeostasis by removing misfolded or O-linked galactose (Gal) residues of keratan. Has a preference for sulfating keratan sulfate, but it also has potential RAB3B effector protein in epithelial cells.

may serve as Ca(2+) sensors in the process of vesicular trafficking and exocytosis.

the death domain of TNFR1. Component of the 26S proteasome, a multiprotein complex involved in the degradation of ubiquitinated proteins. Consensus site 5'-UCCAUCA-3'. May have a role in translation repression (By similarity).

regulates angiogenesis. Acts as a GTPase activator for the RAC1 by converting it to an inactive GDP-bound state. Expressed in the liver.

and Glu adjacent to the leaving group at neutral or slightly basic pH. The proteasome has an AT domain.

involved in membrane trafficking between the plasma membrane and endosomes (PubMed:17233914). Also acts as a filamentous (F) actin cross-linking protein.

inhibits the activity of aminoglycosides, trimethoprim, creatinine, guanidine, procainamide, topotecan, estrone sulfate, acyclovir, ganciclovir and zidovudine.

transforming growth factor) and activin type 1 receptor kinases. Binds the TRE element in the promoter of the myosin heavy chain (MLC). Also regulates actin-myosin interaction through a non-kinase activity. Phosphorylates the axonemal radial spokes (By similarity).

involved in phagocytosis of apoptotic cells. Required for early embryonic development. Involved in cellular growth and differentiation.

is expressed in the cytoplasm of cells, after viral entry but before reverse transcription. In addition to acting as a capsid-specific receptor, it is involved in the assembly of the capsid.

involved in the regulation of lipase (LPL) through the secretory pathway. Each LMF1 molecule chaperones 50 or more molecules of LPL. Has a strong phosphatidase activity.

involved in the regulation of lipoprotein APOE in liver (By similarity).

involved in the regulation of BDNF-NTRK2 endocytic trafficking and signaling from early endosomes (By similarity). Involved in the regulation of stereocilia maintenance in adult hair cells (By similarity).

clock-controlled genes (PubMed:12397359, PubMed:18411297). Acts as the negative limb of a  
ation versus differentiation via its phosphorylation. May be a novel marker for leukemia diagno:  
ght to provide a framework for the nuclear envelope and may also interact with chromatin. Lam  
rber may possibly be a nuclear protein. Similarity to the RAS suppressor protein, as well as exp  
; sigma-1.||Seems to play a role in epithelial tight junction formation. Appears early in primordia  
ght junctions. Association with PARD3 may prevent the interaction of PARD3 with F11R/JAM1,  
ein family including RB1 and regulates the cell-cycle during G(1)/S transition. Phosphorylation

erminal region, and multiple phosphorylation sites and glutamic acid/proline (EP) repeats at the  
ssor for RBPJ. Recruits RBPJ to the Sin3-histone deacetylase complex (HDAC). Required for

eries which require DNA as a template. Histones thereby play a central role in transcription req

A translation and stability. Mediates exon inclusion and/or exclusion in pre-mRNA that are subj  
guidance.

egulation of alternative splicing and influences mRNA splice site selection and exon inclusion. E  
precursors are transported from the base of the cilium to the site of their incorporation at the tip  
gration. Necessary for signaling by class 3 semaphorins and subsequent remodeling of the cytc  
ependent and -independent mechanisms. After the penetration of retroviral nucleocapsids into  
matory processes. Important for defense against pathogens. Cleaves and activates sterol regu  
acts as a molecular scaffold for the final stage of MHC class I folding, namely the binding of p

tyrosine kinases and growth factor receptors. Involved in the regulation of cell survival, cell prolif  
and autophagy in response to nutrient and hormonal signals; functions as a scaffold for recruiting  
the repulsive signaling of Robo and Slit proteins in neuronal migration. SLIT2, probably through  
s, including PRMT3 and PRMT5.

as a primary receptor for some HIV-2 isolates. Promotes Env-mediated fusion of the virus (Pul  
nding proteins (SREBPs). Proteolytically cleaves poly(ADP-ribose) polymerase (PARP) at a '21  
chains as they emerge from the ribosome and block their interaction with the signal recognitio  
r keratins. This gene's expression profile shows that it encodes a type II epithelial keratin, altho  
ly play a role in apoptosis and cell proliferation through its interaction with HSPA5 (PubMed:26  
le budding at the Golgi and anterograde transport to the plasma membrane.

nage checkpoint control and for proper DNA damage repair (PubMed:20230784). In response  
and this transport is coupled to hydrlysis of ATP (PubMed:17408620, PubMed:24576892). The

bidirectional signaling into neighboring cells. The signaling pathway downstream of the receptor is involved in cell cycle regulation during mitosis. May regulate cell proliferation and differentiation in the developing nervous system.

Inhibits DNA and RNA viruses, inhibits cell-cycle progression by binding to promoters and activating transcription factors. Used as a marker to distinguish chondrocytes from osteoblasts and mesenchymal stem cells. Inhibits hydrogen peroxide, by glutathione.

Inhibits histone H4 acetylation and chromatin condensation, thus preventing access of the basal transcription machinery. Isoform 1 and is involved in cell cycle regulation during embryonic development by interacting with other extracellular matrix components.

Inhibits the transcriptional activity of E2A-PBX1. Tethers estrogen receptor-alpha (ESR1) to microtubules. Involved in cell cycle regulation during embryonic development by interacting with other extracellular matrix components. Labeled as a tumor suppressor.

Involved in Schwann cell myelination (By similarity). May act as a catalyst in increasing the rate of conversion of cholesterol to pregnenolone by restricting proliferation and promoting apoptosis. Along with WWC1 can synergistically inhibit cell cycle progression. Both are essential to the immune response and are present on the cell surface of T lymphocytes.

Involved in the machinery of axonal transport. Able to restore partial locomotion and axonal fasciculation to *C.elegans* unc-76 mutant by synergy with the Ca(2+) sensor, STIM1.

Involved in cellular homeostasis (PubMed:30692621). Acts primarily to protect the cell from proteases released by pathogens. Inhibits p53 mediated transcription. p53 mediates its role as an inhibitor of cellular proliferation (By similarity).

Involved in the ubiquitin-proteasome pathway. E3 ubiquitin ligase complex in cooperation with the E2 UBE2D2 that is used not only for the ubiquitination of substrates but also for the ubiquitination of itself.

Involved in the regulation of gene expression. Binding to the 3'-UTR of CEBPA mRNA and regulation of its translation. Targets ITPR1 mRNA to cytoplasmic granules.

Involved in the adhesion of other tissues. Cell adhesion requires divalent cations.

Involved in the regulation of ATP hydrolysis and adjacent subunits in the ring-like structure contribute to the ATPase activity. Involved in the growth of hair (By similarity). Required for the correct growth of hair follicles, in particular for the persistence of the hair cycle and reduced folic acid derivatives. [provided by RefSeq, Jul 2016]

Involved in the membrane protein reorganization. Involved in the delivery of mutated CFTR to the plasma membrane. Together with other proteins mediates ASTN1 internalization and intracellular transport of endocytosed ASTN1 (By similarity). Serves as a scaffolding protein (Flanagan et al., 2006 [PubMed 16793224]). [supplied by OMIM, Mar 2008]

Involved in the regulation of ion exchange (end-blocking or capping). It can promote the assembly of monomers into filaments. Involved in the regulation of nAChR activity seems to be dependent on the nAChR subtype and stoichiometry, and on the expression of MYO5A and MYO7A. May link RAB27A-containing vesicles to actin filaments. Functions as a protein tyrosine phosphatase.

ulation of the immature compartment of the hematopoietic system. Associates with SMADs in the myofibril and fiber exterior. May facilitate lateral force transmission during skeletal muscle  $\alpha$ A isomerase activities. Catalyzes two of the four reactions of the long straight chain fatty acid: the pre-translocational (PRE) to the post-translocational (POST) state as the newly formed A-s (PubMed:10688651, PubMed:12359225, PubMed:12873986, PubMed:15194700, PubMed:1 enveloped viruses (HIV-1 and other lentiviruses). Via its interaction with PDCD6IP involved in

o sulfane (molecular sulfur) atoms. Requires an additional electron acceptor; can use sulfite, S proteasome, in a NUB1-dependent manner. Probably functions as a survival factor. Conjugat id adhesion during neuronal, vascular and epithelial development (PubMed:8070404, PubMed

3CR) which leads to internalization of the complex, trafficking to late endosomes and antigen p

r leading to activation of MAPK1/ERK2. Plays a role in EGFR trafficking from recycling endosor tivity (By similarity).

is where it forms the core structural component of the paraspeckle sub-organelles. It may act a

r membrane into the mitochondrial matrix in an ATP-dependent manner. May act as a co-chap tiple transcript variants. [provided by RefSeq, Mar 2010]

ains. Alternative splicing results in multiple transcript variants encoding different isoforms. [prov

ession in germline cells (By similarity). Prohibits the function of several miRNAs by blocking the -O-alkyl-sn-glycero-3-phosphocholine (lyso-PAF) and lysophosphatidylcholine (lyso-PC), and tnce of prostaglandins from the circulation. Transports PGD2, as well as PGE1, PGE2 and PGF

radient across the membrane which is generated by electron transport complexes of the respira

organisms by affecting both the stability and translation of mRNAs. miRNAs are transcribed by RNA polymerase III. May act by forming a channel that allows the retrotranslocation of mRNAs into the nucleus.

regulation and gating properties of AMPA-selective glutamate receptors (AMPA receptors). Promotes their targeting to the cell surface. It may contribute to cell proliferation by acting as a sponge for microRNAs. [provided by RefSeq]

has a protective antiapoptotic effect on neuronal cells. Multifunctional transcription factor with different regions that regulate transcription or epigenetic transcriptional activation (PubMed:17707229). Plays a central role in beta-globin

transcription. HSF4B activates transcription.

regulates cell cycle stages (PubMed:18940309, PubMed:27226634). Acts by mediating hydroxylation of 'Arg-11' residues. MAGUKs interact with the cytoskeleton and regulate cell proliferation, signaling pathways, and cell cycle as well as more peripheral structures. It facilitates the budding of vesicles from the Golgi apparatus. Regulates cell cycle progression by affecting both the stability and translation of mRNAs. miRNAs are transcribed by RNA polymerase III.

regulates (miRNA) biogenesis. Component of the microprocessor complex that is required to process primary miRNAs. Stimulates inositol trisphosphate production and calcium mobilization upon activation. Together with

other factors (By similarity). Required during synthesis of the leading DNA strands at the replication fork, binds at replication forks. Regulates neuronal excitability by elevating the voltage dependence of neuronal sodium channel S

protein (By similarity), depending on the context (PubMed:22722849, PubMed:26907567, PubMed:30653310). Contains a core homology common to many enhancers (PubMed:16397300). Important transcription factor

because they are long non-coding RNAs (lncRNAs). This gene is expressed in many normal tissues, but not in cancer. Component of SWI/SNF chromatin remodeling complexes that carry out key enzymatic activities. Regulates S proteins (By similarity). Part of an electron transfer chain functioning in an early step of cytoskeleton assembly, probably by facilitating nucleosome assembly. May inhibit cell proliferation by inducing p53-dependent

apoptosis. Triggers massive exocytosis from neurons and neuroendocrine cells. Receptor for TENM2 that

contains a proximal sequence element (PSE), a non-TATA-box basal promoter element common to these 2 transcription



ding of sonic hedgehog (SHH) to its receptor patched is thought to prevent normal inhibition by

action as export adapter involved in mRNA nuclear export such as of histone H2A. Binds mRNA  
ay function as non-coding regulatory RNAs. [provided by RefSeq, Jan 2013]

orenoids that are essential for normal cell function including ubiquinone and geranylgeranyl pro  
dly removed from the transcribed strand of active genes (PubMed:20541997, PubMed:266207  
; control of fluid and electrolyte homeostasis. In the kidney, am is diuretic and natriuretic, and b  
afficking of melanogenic enzymes TYR, TYRP1 and DCT/TYRP2 to melanosomes in melanocy

itol-calcium second messenger system. May be the cardiac P2Y receptor involved in the regu  
PKC, and is involved in the regulation of MAPK8/JNK1 and Ras signaling, Golgi membrane in

ancer progression and metastasis. This transcript regulates expression of genes involved in dif

ement in target genes.

ocalization of PKD1/PC1 and PKD2/PC2 to the ciliary membrane (PubMed:28530676).

on, translocations and deletions. Part of the Rad21 paralog protein complex BCDX2 which acts  
on, translocations and deletions. Part of the RAD21 paralog protein complex CX3 which acts in  
-linked polyubiquitination. Acts as an essential factor of the anaphase promoting complex/cycl

ding and degradation of acetylated low density lipoprotein (Ac-LDL) (By similarity).

tamate residues within the C-terminal tail of alpha- and beta-tubulin. Involved in the side-chain

spliceosomal components bound to both the 5'- and 3'-splice sites during spliceosome assembl  
ter SLC2A4/GLUT4 translocation at the plasma membrane, thus increasing glucose uptake.

olved in cell survival. Acts as a translational activator. Seems to play an essential role in cold-i  
-complexed CDK1 before the onset of mitosis by mediating phosphorylation of CDK1 on 'Tyr-1

mevalonate (MVA) pathway leading to isopentenyl diphosphate (IPP), a key precursor for the b  
seems to bind preferentially to single-stranded DNA.

regulates various physiological processes through the generation of approximately 24 hour circ

d cells. Forms membrane-associated multiprotein complexes that may regulate delivery and re  
n a tissue-specific manner the ability of NOVA1 to activate exon selection. In addition to its func

repressive state of many genes, including Hox genes, throughout development (PubMed:2128253)  
· GTPases outside the Arf family.

ixin-20 augmentation of gonadotropin-releasing hormone (GNRH) signaling in the hypothalamu  
e deleted or epigenetically suppressed in leukemia, and was implicated as a negative regulato

es suggests that is functions as antiporter.

activity against HIV-1 in lymphocytes by decreasing the abundance of HIV-1 viral RNA species.

cross-link repair and in the maintenance of normal chromosome stability.

ins, mitotic progression and chromosome segregation. The CENPA-NAC complex recruits the  
ganisms by affecting both the stability and translation of mRNAs. miRNAs are transcribed by R

R) proteins of the spliceosomal complex. May be a constituent of a network of regulatory mech  
ganisms by affecting both the stability and translation of mRNAs. miRNAs are transcribed by R

3K27me) of histone H3, leading to transcriptional repression of the affected target gene. Able t  
bled complex at the centrosome that recruits CDK2 required for centriole duplication (PubMed:  
ganisms by affecting both the stability and translation of mRNAs. miRNAs are transcribed by R  
re, into the inter-membrane space. Known to process the nuclear encoded protein DIABLO.

the phosphorylation of its regulatory subunit MRLC/MYL9. Through the activation of non-musc

ox sequences. Also suppresses HES1-mediated inhibition of the heterodimer formed by ASCL  
ox sequences. Also suppresses HES1-mediated inhibition of the heterodimer formed by ASCL  
ion upon stimulation. Inhibits DNA-binding of RELA and NFkB1/p50, and of the NF-kappa-B p  
f histone H4 to produce respectively dimethylated 'Lys-20' (H4K20me2) and trimethylated 'Lys-

riptionally repressive state of homeotic genes throughout development. May be involved in spe

by the same enzyme: formation of S-adenosylmethionine (AdoMet) and triphosphate, and sub

actly acyl-CoA substrates (PubMed:15907797, PubMed:18765284). Catalyzes the insertion of a

sequently metabolized to cholesterol (PubMed:21285510, PubMed:28673550, PubMed:235834

lymphoma (By similarity). Binds to DNA at special AT-rich sequences, the consensus SATB1-binding site. Involved in DNA replication. The respiratory chain contains 3 multisubunit complexes succinate dehydrogenase (complex II), cytochrome bc<sub>1</sub> complex (complex III), and cytochrome c oxidase (complex IV). The respiratory chain is the site of oxidative phosphorylation. The respiratory chain contains 3 multisubunit complexes succinate dehydrogenase (complex II), cytochrome bc<sub>1</sub> complex (complex III), and cytochrome c oxidase (complex IV). The respiratory chain is the site of oxidative phosphorylation.

more than 100 centrioles. Deuterosome-mediated centriole amplification occurs in terminally differentiated cells in cancers and is thought to act as promoter of cell proliferation. This transcript negatively regulates various physiological processes through the generation of approximately 24 hour circadian rhythm.

four p38 MAPKs which play an important role in the cascades of cellular responses evoked by various stimuli. The respiratory chain contains 3 multisubunit complexes succinate dehydrogenase (complex II), cytochrome bc<sub>1</sub> complex (complex III), and cytochrome c oxidase (complex IV). The respiratory chain is the site of oxidative phosphorylation. May also be required for the transfer of beta-barrel precursors from the cytosol to the mitochondrial inner membrane.

downstream of decapping. Involved in actin dynamics and cell cycle progression, mRNA decay and regulates various physiological processes through the generation of approximately 24 hour circadian rhythm.

downstream and independently of NF-kappa-B. Suppresses both NCOA2- and NCOA3-induced endoplasmic reticulum stress and deamination of cytosine.

3 (PubMed:28516954). Exhibits attenuated catalytic activity toward N(1),N(8)-diacetylspermidine and polyamines in the cytoplasm.

(By similarity). Binds to double- and single-stranded DNA sequences. Binds to the transcription start site and promotes transcription folding in an environment in which there are many competing pathways for nonnative proteins. This is a putative short protein that is localized to the nucleus (PMID:25978564). Expression of this locus is regulated by RNA polymerase I-dependent transcription. The rate of PIC formation probably is primarily dependent on the phosphorylation of MDM2. Can reverse MDM2-targeted degradation of TP53 while maintaining suppression of cell growth in fibroblastoid cells. Insufficient to induce tumorigenicity when overexpressed but contributes to MYC-induced tumorigenicity. Promotes proteolytic processing of NFkB2/P100, which leads to activation of NF-kappa-B via the p50 subunit.

core histones (H2A, H2B, H3, and H4) form an octamer, around which approximately 146 bp of DNA is wrapped. This complex is thought to have a role in stabilization of the homeoprotein-DNA complex. Isoform 3 is related to the other isoforms (SULT1A3 homolog B) and SULT1A4 (sulfotransferase family, cytosolic, 1A, phenol-preferring, member 4). The respiratory chain is a gradient across the membrane which is generated by electron transport complexes of the respiratory chain. The respiratory chain contains 3 multisubunit complexes succinate dehydrogenase (complex II), cytochrome bc<sub>1</sub> complex (complex III), and cytochrome c oxidase (complex IV). The respiratory chain is the site of oxidative phosphorylation. A set of DNA sequences that define origins of replication have not been identified yet. ORC is required to assemble the pre-replicative complex for MAPK1, probably by association with MAPK1 nuclear export signal leading to enhanced E2F activity.

ne phosphorylation and this promotes the binding of spleen tyrosine kinase (SYK) and initiation organisms by affecting both the stability and translation of mRNAs. miRNAs are transcribed by R

polymerization, playing a key role in the fission of tubules that serve as transport intermediates

lammatory responses. Involved in the induction of T helper 17 cells (Th17) differentiation upon

mtDNA copies and fragmented mitochondrial network. may act by suppressing ATAD3A func

signaling. Probably involved in signaling by the epidermal growth factor receptor (EGFR) and t  
1872744, PubMed:15617512, PubMed:18165688, PubMed:22660477, PubMed:24305054). Wi

llyl diphosphate (DMAPP).

4,5-bisphosphate. Can bind DNA (in vitro). May contribute to the regulation of transcription in th  
f Kv1.5.

ulum but their specific functions are unknown. [provided by RefSeq, Nov 2011]

members of the CLK kinase family (By similarity).

nd taurine, respectively. The preferred substrate is 3-sulfino-L-alanine. Does not exhibit any de

organisms by affecting both the stability and translation of mRNAs. miRNAs are transcribed by R

mitosis (PubMed:12515822, PubMed:15502821, PubMed:16585270). Essential for proper kine  
biosynthesis of lipid mediators of the inflammatory response (PubMed:7794891, PubMed:8619

a G(s) mediated pathway (PubMed:23161870). Involved in neurosteroid inhibition of apoptosis  
on (By similarity). Specifically expressed in endothelium of the blood-brain barrier of micro-vess  
pecifically in the pancreas and likely functions as a digestive enzyme. [provided by RefSeq, Sep

natic activity has not been demonstrated experimentally. Antigens of the Dombrock blood grou



ED1. Isoform 2, functions as a transcriptional repressor, modulating transcriptional activities of c

e. Shows activity also towards tryptophan, aspartate and hydroxykynurenine. Accepts a variety

promotes endothelial cell adhesion to the extracellular matrix and angiogenesis.

radient across the membrane which is generated by electron transport complexes of the respira

ssion of precursor cell proliferation in myoblasts by SIX1 is switched to coactivation through rec

al RNA (Tanaka et al., 2000 [PubMed 10792466]).[supplied by OMIM, Feb 2010]

ganisms by affecting both the stability and translation of mRNAs. miRNAs are transcribed by R

ranule assembly in response to cellular stress.||Component of the C9orf72-SMCR8 complex, a  
1 factor. Belongs to the neuron-specific chromatin remodeling complex (nBAF complex). During

olipids from the outer to the inner leaflet of various membranes and ensures the maintenance o  
e osteoclast-supporting ability of stromal cells. Binds with STAT3 the consensus sequence 5'-C  
ganisms by affecting both the stability and translation of mRNAs. miRNAs are transcribed by R

gene is located on chromosome 20. Alternate splicing results in multiple transcript variants. [prc  
ganisms by affecting both the stability and translation of mRNAs. miRNAs are transcribed by R

ganisms by affecting both the stability and translation of mRNAs. miRNAs are transcribed by R

in mitomycin-C (MMC)-induced DNA repair. Acts as a specific E2 ubiquitin-conjugating enzym

eplication and DNA repair. Affects both insulin and glucagon levels and modulates the express  
A-dependent manner.

3F1 stimulation as well as phosphorylation of IRS1 and SHC1 (By similarity).

gmental duplications on human chromosome 1. This gene family has experienced its greatest

ones and vitamins (PubMed:11555828, PubMed:14559847, PubMed:12865317, PubMed:1580  
provided by RefSeq, Dec 2017]

ippa-B (PubMed:15799966).

1 with the melatonin receptor MTNR1B most likely through receptor heteromerization (PubMed:  
promoting activity of BAX.

ganisms by affecting both the stability and translation of mRNAs. miRNAs are transcribed by R

rmation that affects all subunits and leads to opening of an ion-conducting channel across the  
ay a role in myocyte differentiation and survival by regulating the integrity of the nuclear envelo  
lin-A (CCNA1 and CCNA2), thereby promoting S phase entry. Specifically mediates deubiquitir

nd CRK. Was initially proposed to be required in complex with DOCK1 to activate Rac Rho sm

aintenance of presynaptic homeostatic plasticity.

PubMed:14993212, PubMed:20129055, PubMed:24064211). It is degraded during the mitotic pha  
factors.

ganisms by affecting both the stability and translation of mRNAs. miRNAs are transcribed by R  
TN. Regulates cofilin-dependent actin cytoskeleton reorganization. Required for normal progre

e activity.

conversion of uridine to pseudouridine at specific residues of ribosomal RNAs or small nuclear RNAs.

synaptic clustering of crucial synaptic proteins. Interacts with the cytoplasmic tail of NMDA receptor and opening an integral chloride channel.

acts through its predominant phospholipase C activity, cleaving preferentially acyl groups in sn3 phospholipids across endoplasmic reticulum (ER).

31, activin-A/INHBA and BMP4 by interfering with the transcriptional stimulatory activity of transcription factors.

organisms by affecting both the stability and translation of mRNAs. miRNAs are transcribed by RNA polymerase II.

from nucleoprotein filaments formed on dsDNA. Could be involved in the turnover of RAD51 protein.

phosphorylation (Ser, Thr or Tyr).

phosphorylation leading to an increase in glycogen synthesis.

ribosome alignment and cytokinesis.

at the 3' end of the RNAs and a double-hairpin structure. The box ACA small nucleolar RNAs are targeted to the proteasome for degradation. Multiple specialized proteins interact with one another during ER stress.

sulfide metabolism (PubMed:24981631). Provides the link between the first step in mammalian methionine metabolism and the synthesis of S-adenosylmethionine.



ed:21671375, PubMed:25637936, PubMed:22178193). In addition to its cholesterol-synthesisii regulate the expression of XIST, which is essential for the initiation and spread of X-inactivatio

cer (NSCLC). Differential DNA methylation of this locus may be associated with intellectual disc

tion as a coinhibitor of other CREBBP/EP300-dependent transcription factors.||Tissue-specific

ERK1/2 (By similarity). Inhibits TGFB-induced epithelial-to-mesenchymal transition in lens epitl

'A[TC][AG]-3'.

DK-specific inhibitor CDKN1A/p21 (PubMed:11980906). May play a role in the regulation of RT

ie nucleoplasm. This RNA is processed from an intron of the prohibitin 2 host gene. It includes

(By similarity).

-mRNA processing. snoRNAs form part of the small nucleolar ribonucleoprotein particles (snoF

the pancreas. May act as a chaperone that inhibits aggregation of misfolded proteins.

tein (S300-II) stimulates initiation of transcription. Binds to both direct repeats and palindromes  
ain containing 7 cadherin repeats. The gene product is an integral membrane protein that is the

'). Modulates YAP1 activity as transcriptional regulator (PubMed:30447097).

ently from catalytic activity, promotes cell invasion in response to constitutive RhoA activation b  
in eukaryotes) from the lipid carrier dolichol-pyrophosphate to an asparagine residue within an  
organisms by affecting both the stability and translation of mRNAs. miRNAs are transcribed by R  
organisms by affecting both the stability and translation of mRNAs. miRNAs are transcribed by R  
g the exchange of subunits at these ends. Unlike other capping proteins (such as gelsolin and  
me 6. Members of the LY6 superfamily typically contain 70 to 80 amino acids, including 8 to 10  
or of SHH signaling in the absence of SHH ligand: interacts with SUFU, thereby inactivating the

lecule.

Mutations in this gene cause combined oxidative phosphorylation deficiency-20, and are also  
nding protein (CREBBP) to nuclear bodies. Component of the CREST-BRG1 complex, a multi-

ie Notch signaling pathway (PubMed:29856954, PubMed:29856955, PubMed:29561261). Able  
erentially uracil, thymine, and cytosine (deoxy)nucleoside di- and triphosphates by an antiport r  
regulates trophoblast cells migration. It regulates cytoskeletal remodeling by controlling the activ

o phosphatidylserine (1,2-diacyl-sn-glycero-3-phospho-L-serine or PS) (LPSAT activity). Prefer  
ed to stabilize the Ku heterodimer, composed of XRCC5/Ku80 and XRCC6/Ku70, at double-str

nt signaling pathway upon stimulation by bone morphogenetic proteins, such as GDF2/BMP9 a  
rogenic program and meiotic prophase entry. Acts downstream of bone morphogenetic protein ( B  
: promoter region of a number of genes whose products are involved in cell cycle regulation or  
g its extracellular region with that of several known growth factor receptors, such as EGFR and  
ype calcium channels that contain CACNA1A as pore-forming subunit (By similarity). Regulate

IRT2 around early anaphase. May dephosphorylate the APC subunit FZR1/CDH1, thereby pro  
nd of epithelial calcium ion transport. Regulates endochondral bone development and epithelia  
ng NEK2 kinase activity (PubMed:26220856).

ales. This X chromosome gene is intronless and was identified because its transcription escape  
).

n interactions. Several alternatively spliced transcript variants encoding different isoforms have

rylation. The respiratory chain contains 3 multisubunit complexes succinate dehydrogenase (cc  
SLC7A8 and mainly transports branched-chain amino acids and phenylalanine. Plays a role in

e deacetylases. Acts as a specific transcriptional repressor for PTCH1 during embryonic devel  
nzyme UBC12. Neddylation of cullins play an essential role in the regulation of SCF-type comp  
is mascRNA) from its 3' end. The resultant mature transcript lacks a canonical poly(A) tail but is

) for RAC1 and CDC42. Activated by the binding to subunits beta and gamma of the heterotrim

ly (MVB)-like organelles in dendrites (By similarity).

oglobulins, also known as antibodies, are membrane-bound or secreted glycoproteins produce  
are cell-surface proteins that are characterized by the presence of four hydrophobic domains. T  
ct-dependent bidirectional signaling into neighboring cells. The signaling pathway downstream  
P56. Probably plays a role under changing environmental conditions (oxygen, glucose, nutritio  
ng dynein to cargos and to adapter proteins that regulate dynein function. Cytoplasmic dynein  
aining negatively charged phospholipids in a Ca(2+)-independent manner (By similarity).

script variants. Some transcript variants may promote growth, while others may act to negatively regulate functions, including behavioral responses to stress (By similarity), amyloid-beta peptide generation, and it converts cholesterol and phosphatidylcholines (lecithins) to cholesteryl esters and lysophospholipids.

Phosphorylates UDP-GlcUA and N-acetylgalactosamine (GalNAc) from UDP-GalNAc to the non-reducing end of the glycan on replication forks. The MMS22L-TONSL complex is required to maintain genome integrity during DNA replication (PubMed:18762581). Facilitates constitutive LRP6 phosphorylation by CDK14/CCNY during G2/M stage of the cell cycle.

Component of the cyclin-dependent kinase pair (CDK9/cyclin T) complex, also called positive transcription factor 1 (PTF1), which is involved in DNA lesion repair upon damage by the RAD17-replication factor C (RFC) clamp loader complex. Also involved in DNA replication.

Found in chromaffin granules and synaptic vesicles.

Component of the ubiquitin-proteasome system. Probable substrate-recognition component of an E3 ubiquitin ligase complex. In vitro, the processed forms GRO-alpha(4-73), GRO-alpha(5-73) and GRO-alpha(6-73) show ubiquitin ligase activity.

Found in homotypic chains.

Involved in pre-mRNA processing. snoRNAs form part of the small nucleolar ribonucleoprotein particles (snoRNPs) in platelet dense granules and melanosomes. In concert with the AP-3 complex, the BLOC-1 complex is involved in targeting those complexes on gene promoters (PubMed:19131338, PubMed:23178126). Enhances ligand-induced activation of APC promoting APC activation/maturation and driving Th1 immune response. ||Lymphocyte activation.

Involved in the conversion of diacylglycerol pyrophosphate into phosphatidate but can also act on phosphatidate directly. This gene is one of several chemokine-like factor genes located in a cluster on chromosome 17q21.3, a region of the human genome that is a hot spot for neurodegenerative and psychiatric disorders; hence maximizes the local concentration of bicarbonate at the transporter site.

Involved in cell cycle regulation (PubMed:20676357). Component of a putative tumor-recognition complex involved in the function of the tumor suppressor protein p53.

Involved in adipogenesis (PubMed:25855295). Required for normal body fat and glucose homeostasis. ADIPOQ-binding protein.

Involved in the formation of actin filaments in the heart muscle sarcomeres (PubMed:27733623). Isoform 2 might play a role in the regulation of the heart muscle sarcomeres.

Involved in the regulation of viral RNA and oligomerizes. The viral protein also possesses a nuclear import and a nuclear export signal.

ctivity.

signals from, the activated insulin receptor (INSR). Potent inhibitor of insulin-stimulated MAPK3  
y of receptor tyrosine kinases which are crucial for migration, repulsion and adhesion during ne

modulate cell shape and motility after injury. May be involved in multiple neurite formation (By s

ganisms by affecting both the stability and translation of mRNAs. miRNAs are transcribed by R  
; (By similarity).

HCFC1-dependent manner. Also suppresses the HCFC1-dependent transcriptional activation l  
ion of arterial blood pressure, and increased somatostatin secretion from the pancreas. Neuroq

iggers massive exocytosis from neurons and neuroendocrine cells. Receptor probably implicat  
le in nasal colonization.||(Microbial infection) Binds S.pneumoniae PsrP, mediating adherence  
ells, antigen-independent and -dependent interactions of T-lymphocytes with target cells and an  
ise-activating protein domain which stimulates GTP hydrolysis by RAC1, RAC2 and CDC42. Ac  
ole in neuronal apoptosis.

: role in purine metabolism and in adenosine homeostasis. Modulates signaling by extracellular  
fferent membrane traffic pathways. Adaptor protein complexes are vesicle coat components a  
fection, serves as receptor for HCoV-229E spike glycoprotein.||(Microbial infection) Mediates as  
o form inositol 1-phosphate.

genesis of melanosomes and promote their association with the apical cell surface by inducing g  
otic arginase functions to regulate L-arginine bioavailability to nitric oxid synthase (NOS). Argir

trix. The encoded protein is postrationally glycosylated and localized to the lysosome. This

ant roles in coordinating transcription activation and repression by MAFK (By similarity). Togeth  
; endothelial survival during infection (By similarity). Can inhibit apoptosis induced by serum sta  
pes such as tissue-resident memory T (Trm), natural killer (trNK) and natural killer T (NKT) cell  
f actin reorganization, cell migration, cell proliferation and survival, cell adhesion, and apoptosis  
PubMed:20673843). Plays a roles as pro-apoptotic protein that positively regulates intrinsic ap  
g their poly(A) tail removal or deadenylation, and hence provide a mechanism for attenuating p  
er that elicits calcium release from intracellular stores. May be involved in pre-B-cell growth.

act as a bridge between myosin and actin filaments). Stimulates actin binding of tropomyosin v

play an important role in macrophage function. May play a role in regulating cytoplasmic and/or signal transduction. Proteolytically cleaves MYOC at 'Arg-226' (PubMed:17650508). Proteolytically cleaves poly(ADP-ribose) polymerase (PARP) at a '216-Asp-Gly-217' bond. Cleaves and activates stromal matrix metalloproteinase 2 that targets to lipid rafts and drives caveolae formation. Mediates the recruitment of CAVIN proteins to the plasma membrane.

stromal matrix or directly to stromal cells. Could act as a scaffold for the attachment of lineage specific cells.

involved in the prevention of platelet aggregation by hydrolyzing platelet-activating ADP to AMP. Hydrolyzes ADP in the tissue microenvironment (PubMed:16541107, PubMed:19703720, PubMed:2272606). Inhibits the formation of the alpha-beta-CLIP complex, thereby preventing the loading of antigenic peptides to the MHC class II molecules.

involved in cell-cell adhesion between cells of the same type. Cadherins may thus contribute to the sorting of heterogeneous cell types. Acts as a cell adhesion molecule in connecting cells; cadherins may thus contribute to the sorting of heterogeneous cell types.

involved in cell-cell adhesion between cells of the same type. Cadherins may thus contribute to the sorting of heterogeneous cell types. May act as a cell adhesion molecule in connecting cells; cadherins may thus contribute to the sorting of heterogeneous cell types. May act as a cell adhesion molecule in connecting cells; cadherins may thus contribute to the sorting of heterogeneous cell types. May act as a cell adhesion molecule in connecting cells; cadherins may thus contribute to the sorting of heterogeneous cell types.

involved in cell-cell adhesion between cells of the same type. Cadherins may thus contribute to the sorting of heterogeneous cell types. May act as a cell adhesion molecule in connecting cells; cadherins may thus contribute to the sorting of heterogeneous cell types. May act as a cell adhesion molecule in connecting cells; cadherins may thus contribute to the sorting of heterogeneous cell types. May act as a cell adhesion molecule in connecting cells; cadherins may thus contribute to the sorting of heterogeneous cell types.

involved in cell-cell adhesion between cells of the same type. Cadherins may thus contribute to the sorting of heterogeneous cell types. May act as a cell adhesion molecule in connecting cells; cadherins may thus contribute to the sorting of heterogeneous cell types. May act as a cell adhesion molecule in connecting cells; cadherins may thus contribute to the sorting of heterogeneous cell types.

involved in cell-cell adhesion between cells of the same type. Cadherins may thus contribute to the sorting of heterogeneous cell types. May act as a cell adhesion molecule in connecting cells; cadherins may thus contribute to the sorting of heterogeneous cell types. May act as a cell adhesion molecule in connecting cells; cadherins may thus contribute to the sorting of heterogeneous cell types. May act as a cell adhesion molecule in connecting cells; cadherins may thus contribute to the sorting of heterogeneous cell types.

involved in cell-cell adhesion between cells of the same type. Cadherins may thus contribute to the sorting of heterogeneous cell types. May act as a cell adhesion molecule in connecting cells; cadherins may thus contribute to the sorting of heterogeneous cell types. May act as a cell adhesion molecule in connecting cells; cadherins may thus contribute to the sorting of heterogeneous cell types. May act as a cell adhesion molecule in connecting cells; cadherins may thus contribute to the sorting of heterogeneous cell types.

involved in cell-cell adhesion between cells of the same type. Cadherins may thus contribute to the sorting of heterogeneous cell types. May act as a cell adhesion molecule in connecting cells; cadherins may thus contribute to the sorting of heterogeneous cell types. May act as a cell adhesion molecule in connecting cells; cadherins may thus contribute to the sorting of heterogeneous cell types. May act as a cell adhesion molecule in connecting cells; cadherins may thus contribute to the sorting of heterogeneous cell types.

involved in cell-cell adhesion between cells of the same type. Cadherins may thus contribute to the sorting of heterogeneous cell types. May act as a cell adhesion molecule in connecting cells; cadherins may thus contribute to the sorting of heterogeneous cell types. May act as a cell adhesion molecule in connecting cells; cadherins may thus contribute to the sorting of heterogeneous cell types. May act as a cell adhesion molecule in connecting cells; cadherins may thus contribute to the sorting of heterogeneous cell types.

involved in cell-cell adhesion between cells of the same type. Cadherins may thus contribute to the sorting of heterogeneous cell types. May act as a cell adhesion molecule in connecting cells; cadherins may thus contribute to the sorting of heterogeneous cell types. May act as a cell adhesion molecule in connecting cells; cadherins may thus contribute to the sorting of heterogeneous cell types. May act as a cell adhesion molecule in connecting cells; cadherins may thus contribute to the sorting of heterogeneous cell types.

involved in cell-cell adhesion between cells of the same type. Cadherins may thus contribute to the sorting of heterogeneous cell types. May act as a cell adhesion molecule in connecting cells; cadherins may thus contribute to the sorting of heterogeneous cell types. May act as a cell adhesion molecule in connecting cells; cadherins may thus contribute to the sorting of heterogeneous cell types.

involved in cell-cell adhesion between cells of the same type. Cadherins may thus contribute to the sorting of heterogeneous cell types. May act as a cell adhesion molecule in connecting cells; cadherins may thus contribute to the sorting of heterogeneous cell types. May act as a cell adhesion molecule in connecting cells; cadherins may thus contribute to the sorting of heterogeneous cell types.

involved in cell-cell adhesion between cells of the same type. Cadherins may thus contribute to the sorting of heterogeneous cell types. May act as a cell adhesion molecule in connecting cells; cadherins may thus contribute to the sorting of heterogeneous cell types. May act as a cell adhesion molecule in connecting cells; cadherins may thus contribute to the sorting of heterogeneous cell types. May act as a cell adhesion molecule in connecting cells; cadherins may thus contribute to the sorting of heterogeneous cell types.

and stimulates transcription.

esis, through the formation of HS proteoglycans (HSPGs) (PubMed:28132690, PubMed:28148). n of several signaling pathways including phospholipase C (PLC), intracellular calcium, mitoger ncluding tissue remodeling, fibrosis, wound healing, inflammation and tumor growth. Both plasr

ing enzyme in gluconeogenesis. Plays a role in regulating glucose sensing and insulin secretio ation in absence of ligand. Recruits SMAD7 to ACVR1B which prevents the association of SMA aments to membrane glycoproteins. Anchors various transmembrane proteins to the actin cyto: e involved in reorganizing the actin cytoskeleton in response to signaling events, and may also c nesis and in the development of the vascular network and the cardiovascular system during en adhesion, integrin-mediated signaling, cytoskeletal remodeling, cell motility, immune response PubMed:26319512). Important in nervous system development (PubMed:24415674).

optotic mimicry (PubMed:21501828). Plays a role in Dengue cell entry by apoptotic mimicry (Pu g and delivers antimicrobial peptides to autophagolysosomes, providing broad host protection /iral activity against influenza virus. Promotes oxidative killing and delivers antimicrobial peptide

nyl compounds. The metabolism of glutathione releases free glutamate and the dipeptide cyste ic ligand-gated chloride channels. Channel opening is triggered by extracellular glycine (PubMe pendent phospholipase activity (By similarity). Binds gangliosides and stimulates ganglioside C ns (PubMed:22609986, PubMed:15525651, PubMed:15240885, PubMed:17565996, PubMed: e nucleotide-binding proteins (G proteins) are involved as modulators or transducers in various ch receptor phosphorylation initiates beta-arrestin-mediated receptor desensitization, internaliz irus protein NS5A.||Key regulator of inflammation, lipid metabolism and mitochondrion homeos

odium falciparum merozoites are most likely located within the extracellular domain. Glycophor glycosaminoglycans, heparin or dermatan sulfate. In the presence of the latter, HC-II becomes i on. Involved in embryogenesis and hematopoiesis (By similarity).

unction in nucleosome phasing and in the 3'-end processing of mRNA transcripts. They are als e expression in differentiated tissues. Is thought to act as a 'pioneer' factor opening the compac line.

HSPA1A (in vitro) (PubMed:24318877). Plays a role in protein transport into mitochondria via ll as neuronal regeneration. Promotes neurite outgrowth from cortical neurons grown on a mon atases PP2A, PP4 and PP6 by protecting their partially folded catalytic subunits from degradat nponents of the IL2 receptor, including IL2RB and probably IL2RG but not IL2RA (PubMed:81 esent in oocytes and is involved in sperm-egg fusion (By similarity). Integrin alpha-6/beta-4 (ITC ence (ICS)) and represses those genes. Also acts as an activator for several genes including H \. Exhibits antiviral activity against RNA viruses including hepatitis C virus (HCV), hepatitis A vir

ing the resting membrane potential in electrically excitable cells. Probably participates in establ

s during embryonic development by interacting with other extracellular matrix components.||Lar

s during embryonic development by interacting with other extracellular matrix components.

s during embryonic development by interacting with other extracellular matrix components.

IFNG production by natural killer cells (By similarity).||Binds galactosides (PubMed:18005988).

and the terminal methyl group of the fatty acyl chain. Desaturates (11E)-octadecenoate (trans-

: involved in, may contribute directly to or modify tumorigenesis.

PubMed:26838787). Regulator of Ras expression. May play a role in tumor suppression. Plays a

e (allysine) (PubMed:27735137). Acts as a transcription corepressor and specifically mediates

also be implicated in signaling events and activation of gene transcription. May be involved in

e attachment of the heterotrimeric complex to the cell surface. Isoform 2 is probably non-functi

e element found in the SKP1, BAX, DCPS, and SELENOH promoters.||Kaliocin-1 has antimicro

AD (R-SMAD). SMAD1/OAZ1/PSMB4 complex mediates the degradation of the CREBBP/EP3

ay allow melanoma cells to interact with cellular elements of the vascular system, thereby enha

th factor- and stress-induced genes. Mediates cellular functions not only in skeletal and cardiac

tyrosine kinase that transduces signals from the extracellular matrix into the cytoplasm by bind

rase II transcription by suppressing transient pausing by the polymerase at multiple sites along

PubMed:2153297, PubMed:1645757). In case of HIV infection, interacts and cleaves the secre

(comp), during development, haemostasis and pathological conditions (arthritic disease). May

ria, fungi and other pathogens.||(Microbial infection) Interacts with Hepatitis B virus envelope p

duction of methionine sulfoxide in proteins to methionine.

sequence 5'-CAC[GA]TG-3'. MXI1 thus antagonizes MYC transcriptional activity by competing f

complexes.

gulates various physiological processes through the generation of approximately 24 hour circar

Binds to calmodulin in the absence of calcium (By similarity).

T5A which activate downstream NFkB signaling pathway and may result in the inhibition of WN

in of the neurotrophic factor SERPINF1 and relocalizes beta arrestin at the plasma membrane;

also play a role in other cellular processes such as apoptosis, cell growth, differentiation and ge



ation, or cell cycle regulation. Plays a role in dendrite spine morphogenesis as well as synapse  
tive alpha-amidated peptides, a terminal modification in biosynthesis of many neural and endoc  
hology/dynamics and apoptotic cell death via local modulation of cAMP/PKA signaling in the n  
aerobic respiration. Can also phosphorylate PDHA2. Decreases glucose utilization and increas  
on (TEM) under most inflammatory conditions (PubMed:19342684, PubMed:17580308). Tyr-69  
olipids from the outer to the inner leaflet of various membranes and ensures the maintenance

ological activity (PubMed:9593714, PubMed:15664000, PubMed:18162525, PubMed:1859763  
rdrate units and are essential for the stability of the intermolecular collagen cross-links.

development.

low density lipoproteins or VLDL) into high-density lipoproteins (HDL) as well as the exchange  
:(By similarity). Mediates SEMA4A- and SEMA4D-dependent inhibitory synapse development  
: enzyme to a particular subcellular compartment.

and Glu adjacent to the leaving group at neutral or slightly basic pH. The proteasome has an AT  
e (PubMed:17331072, PubMed:18393449, PubMed:23704371, PubMed:30367560, PubMed:2  
ation, most likely by acting at the level of SYK to affect downstream events such as phosphory  
? regulating its activity.||The first PTPase domain has enzymatic activity, while the second one

PubMed:21454754). Binding to chondroitin sulfate and heparan sulfate proteoglycans has opp  
te binds to a variety of effector proteins to regulate cellular responses, such as secretory proce  
c transformation and membrane trafficking. Accomplishes its multiple functions by interacting w  
GTP. Preferentially activates HRAS in vivo compared to RRAS based on their different types of  
rt from the Golgi apparatus to the lysosomes by a pathway that is independent of the mannose  
ation.

ng and activation of CCR2 and induces a strong chemotactic response and mobilization of intr  
the release of gelatinase B. This protein can bind heparin. Binds to CCR1, CCR2 and CCR3.

response and mobilization of intracellular calcium ions (PubMed:11352563, PubMed:1103508  
chemotactic and angiogenic properties, it has strong antibacterial activity against Gram-positiv  
to integrins ITGAV:ITGB3 and ITGA4:ITGB1. Can activate integrins in both a CX3CR1-depend  
interactions with E-, P- and L-selectins, mediates rapid rolling of leukocytes over vascular surfa  
e in regulating cell growth and differentiation in specific cell types. SFRP1 decreases intracellul

to parallel bundles (PubMed:20393565, PubMed:21685497, PubMed:23184945). Plays a role i

y similarity). Binds cooperatively with POU3F2/BRN2 or POU3F1/OCT6 to gene promoters, wh

immune response receptors, integrins and other adhesion receptors, receptor protein tyrosine k

semble during myogenesis and it contributes to myogenic membrane structure and differentiation with peptide (peptide loading).

Known to act on MMP-1, MMP-2, MMP-3, MMP-7, MMP-8, MMP-9, MMP-10, MMP-13, MMP-14 and by CTNNB1 and TCF family members in Wnt signaling. The effects of full-length TLE family members (By similarity).||Lysosomal integral membrane protein that regulates the localization and activity of

structure. The BCR(TNFAIP1) E3 ubiquitin ligase complex mediates the ubiquitination of RHOA, leading to a heterotrimer formed by TRAF1 and TRAF2 is part of a E3 ubiquitin-protein ligase complex that is involved in the regulation of signaling pathways leading to the production of cytokines and interferon. Required for the association with the receptor cytoplasmic domain and kinases. Mediates activation of NF-kappaB by phosphorylation of a serine/threonine residue in E1, yielding a ubiquitin-E1 thioester and free AMP. Catalyzes the ISGylation of proteins (PubMed:20061386). E2 ubiquitin conjugating enzyme that transfers ubiquitin to MAEA, a core enzyme involved in the transfer of glucose from UDP-glucose to ceramide to produce glucosylceramide/GlcCer (P

It is found in various non-epithelial cells, especially mesenchymal cells. Vimentin is attached to the cytoskeleton and clathrin-coated pits. Binding to Reelin induces tyrosine phosphorylation of Dab1 and modulation of the cytoskeleton of neurons linked by dendrodendritic gap junctions. May operate in the control of brain development. Required for normal timing of IHH expression during embryonic bone development, normally expressed in the 5' exons reside in the pseudoautosomal region and the remaining exons within the X-specific centromeric region. Plays a role in ubiquitin-mediated protein degradation during muscle atrophy. Plays a role in the

stem. Plays a role in extracellular matrix formation.

Induced by nuclear hormone receptors. Positive regulator of the circadian clock gene expression: stimulates cell reorganization and cell migration (PubMed:15723050, PubMed:9418861, PubMed:9092543). Involved in the formation of focal adhesion complexes, activation of the protein kinase PTK2/FAK1 and subsequent signaling pathway operations.

Two cytoskeletal domains critical for saltatory conduction of nerve impulses in myelinated nerve fibers. Demarcates the plasma membrane channel TRPV6, and is also localized to the inner mitochondrial membrane where it may participate in lipid synthesis (PubMed:17581632, PubMed:25849773, PubMed:27462815). The eIF-3 complex associates with bile acids and glucuronides from cholestatic hepatocytes (By similarity).

Suggesting a regulatory role in glial cell. Also cleaves alpha-2 macroglobulin. May be involved in the regulation of the 5'-cap structure of mRNAs (PubMed:9790902, PubMed:9705270, PubMed:1034721). Also associated with TNFRSF11B/OPG (PubMed:26457518, PubMed:10549288). Induces apoptosis. Its activity is regulated by

and receptor. The resulting death-inducing signaling complex (DISC) performs caspase-8 proteolysis leading to cardiomyocyte proliferation and heart development.

It has GTPase activity. It associates with calmodulin. Could serve as an assembly scaffold for the

tion. Modulates phagocytosis mediated by Fc gamma receptor and ARF6. Modulates PXN recruitment to autophagosomes. Interacts directly with both the cargo to become degraded and an autophagy

of the germline meiotic cell cycle and additionally in the control of mitotic cell cycle in some somatic cells. Modulates endosome-trans-Golgi network structure (By similarity). Together with LRRK2, plays a role in the mechanisms that regulate neuronal shape, growth, and plasticity, through their effects on the actin cytoskeleton. Modulates PTPN18 leading to ABL1 dephosphorylation. May play a role as a scaffold protein between PTPN18 and lactate, pyruvate, branched-chain oxo acids derived from leucine, valine and isoleucine, and thereby regulate dopamine transport back from the synaptic cleft into the presynaptic terminal. Modulates FOXO1/HNF1A and FOXO1. Inhibits epithelial cell migration. Mediates colon carcinoma cell survival at the cell surface (By similarity).

May also have functions in cellular differentiation (By similarity). Induces differentiation of fibroblasts, mainly through the type II receptor, and is released upon activation of signaling. May recruit

integrins, spreading and cell migration and acts as a negative regulator in integrin-mediated cell adhesion

and cell migration. C-terminal extension that inactivates the chromo domain (PubMed:19808672).[[[Isoform 2]: Chromodomain containing protein with non-reducing N-acetylglucosamine (GlcNAc) residues within keratan-like structures on N-linked glycosylation sites upstream of the JUN N-terminal pathway. Phosphorylates SMAD1 on Thr-322.

ANK1 and SHANK3. By physically linking GRM1 and GRM5 with ER-associated ITPR1 receptor, links the MAPK cascade to form a functional JNK signaling module. Required for JNK activation in neurons. May play a role in arthritis. Can in arthritic diseases. Could also be a critical factor in the exacerbation of neurodegenerative

diseases. Modulates ubiquitination and proteasomal degradation of SIAH1, and thereby increases cellular levels of SIAH1. Binds matrix metalloproteinases (ADAMs), NADPH oxidases (NOXs) and phosphoinositide 3-kinase. Modulates endosomes and the Golgi. As a RAB9A effector it is involved in recycling of the mannose 6-phosphate receptor (GEF) that promotes the exchange of GDP to GTP, converting inactive GDP-bound RAB9A to active GTP-bound RAB9A at synapses.

of the cytoskeleton.

(By similarity).

2 (PubMed:16923123). Plays a role in endocytosis and intracellular protein transport. Recruits TRAF3 to TRAF3. Acts as a regulator of TRAF3 function by maintaining them in a latent state. Blocks TRAF3. Bim-alpha3 induce apoptosis, although less potent than isoform BimEL, isoform BimL and isoform BimS (By similarity). Required for tissue-specific adhesion of T lymphocytes to peripheral tissues. Modulates cell cycle function in cell proliferation and migration and play a role in the maintenance of epithelial integrity.

892, PubMed:23236473). Mediates CPEB3-accelerated mRNA deadenylation by binding to Cytoskeleton. Promotes formation of actin filaments. Part of the WAVE complex that regulates lamellipodium, triacylated lipopeptides (PubMed:20037584). In response to diacylated lipopeptides, forms growth cones. Could serve as a ligand that guides specific growth cones by a motility-inhibiting

sequences among different species supports their functional significance. PEST sequences typically

has no effect on cell proliferation. Negatively regulates mitochondrial fusion in cooperation with

regulate growth cone collapse and cell migration (By similarity).

Contributes to cell shape changes. Induces pseudopodia formation in fibroblasts.

Protects against mitochondrial damages. Plays a role in the stress-induced biogenesis and degradation of protein aggregates. Promotes vesicles separation by binding CLEC1B, triggering CLEC1B activation in platelets and leading to signaling pathways, for example the T-cell, leptin and insulin receptors. Once phosphorylated, functions as a transcription factor (PubMed:30610177).

Regulates histone methylation (PubMed:27214403, PubMed:28262558). Does not demethylate histone H3 'Lys-9' or H3 'Lys-27'. Defects in this gene and subsequent Hedgehog signaling pathway that requires the presence of intact primary cilia

are associated with obesity (H), providing the potential to regulate intracellular levels of acyl-CoAs, free fatty acids and CoA. Promotes release of cytokines and IFNG by activated T-cells. Mediates the response of T-cells toward infection and signal transduction.

Interacts with RII isoforms with downstream effectors to capture, amplify and focus diffuse, trans-cellular signals

1. Does not bind fibulins. It probably has a role in cell-extracellular matrix interactions.

Receptor.

Involved in cell division during neuronal development. May be involved in regulation of anti-apoptotic effects of IGF1. Promotes protein-protein and protein-DNA interactions. [provided by RefSeq, Jul 2008]

Localizes to the subsynaptic cytoskeleton. May induce enrichment of PSD-95/SAP90 at the plasma membrane (PubMed:10788476). The coat has two main functions, the physical deformation of the membrane and

is involved in transcriptional activation of glycolytic target genes. Involved in glucose-responsive gene regulation (PubMed:18675823). Involved in mitochondrial motility. When O-glycosylated, abolishes

activity. May mediate the enhancement of phagocytosis in monocytes and macrophages upon interaction. Promotes

localizes to contact sites between the endoplasmic reticulum and endosomes and acts by promoting

demethylation of histone H3 'Lys-4', H3 'Lys-27', H3 'Lys-36' nor H4 'Lys-20'. Only able to demethylate trimethyl

lysine. Plays a role in cell growth promotion and hepatoma formation. Inhibits the TGF-beta signaling by interacting

polyubiquitin chains to TAB2 promotes autophosphorylation of MAP3K7 at 'Thr-187'. Involved in phosphatase enzyme which catalyzes the conversion of phosphatidic acid to diacylglycerol during

ing mitosis, it mediates the ubiquitination and subsequent proteasomal degradation of AURKA, mutant-activated LRP6. Regulates thymocyte proliferation.

T)' motif in the apical loop.

ogenesis (PubMed:28488682).

179534). May have a general role in telomere regulation (PubMed:12676087, PubMed:1269961) by TULP3 and the IFT-A complex to primary cilia and acts as a regulator of the PKA-dependent affinity to alpha-tocopherol. Also binds with a weaker affinity to other tocopherols and to tocotrienol 3'-splice site. Regulates alternative splicing of tissue-specific exons and of differentially spliced exons in the promoter region.

in glutamatergic synapse development and is required for SEMA4A-mediated excitatory synapses, probably also other latrophilins that are expressed at the surface of adjacent cells. May play a role in calcium signaling (PubMed:108669, PubMed:20829356, PubMed:30918116). May play a role as a Ca(2+)-leak channel to regulate

al glutaminy residue and a lack of importance of chain length after the second residue. Also can contribute to the generation and extracellular release of beta-cleaved soluble APP, and a corresponding

ed replication forks (PubMed:19525956, PubMed:21613998, PubMed:21720370, PubMed:23677) (WNT7A or WNT7B) (PubMed:28289266, PubMed:30026314). Plays a key role in Wnt7-specific res

ceptor ubiquitination and accelerated intracellular degradation.

hibiting MYRF self-cleavage and N-fragment nuclear translocation. The secreted form promotes and bind to the ER membrane protein VAPA and recruit VAPA to plasma membrane sites, thus promoting protein lipidation and starvation-induced autophagy. Isoform 4 is also required for autophagy by binding the lipid in a hydrophobic cavity. Able to transfer phosphatidylinositol in vitro.

nine receptor DRD2. Inhibits signal transduction by increasing the GTPase activity of G protein

it pathway. Binds preferentially to the sequence 5'-TTCATTCATTCA-3'. Binding to the histone H3 (PubMed:15961997).

ine protein KREMEN that promotes internalization of LRP5/6. DKKs play an important role in v

and by the release of cytochrome c from the mitochondria into the cytoplasm. Plays a role in inhibit growth of glioma cells by promoting arrest of mitotic progression at the G2/M transition. Fib and also caspase-9 in a probable cell type-specific manner. Involved in activation of the mitoch

led:24120868). In ribosome biogenesis, may also play a role in rRNA transcription (PubMed:27 early endosomal transport.

OS). Modulates the nuclear activation of ERK1/2 and the ELK1 transcription factor, and is cap dependent interactions with E-, P- and L-selectins.

nd ARF5 and a lesser activity towards ARF6. May coordinate membrane trafficking with cell grc

otic membrane including NMDA-type and metabotropic glutamate receptors via complexes with phosphatase (dCMP), deoxyguanosine monophosphate (dGMP) and deoxythymidine monophos <2 to the plasma membrane thereby serving as an adapter to facilitate the phosphorylation of C .GGGGG-3' (PubMed:14621294). Binds to the HMGN1 promoter and may repress HMGN1 exp rant receptors (By similarity).

/ a preference for FAHFAs with branching distal from the carboxylate head group of the lipids ( and neuropeptide head activator. May transduce physical stimuli in mast cells. Activated by te ress through mitosis and cytokinesis. Required for normal formation of the cleavage furrow at t cells.

/ are enzymes that metabolize many different compounds, such as steroid hormones, prostagla a beta-oxidation (PubMed:17681178, PubMed:24269233, PubMed:22633490). ACSL5 may ac otein signaling pathways.

re residue to an already glycosylated peptide. In contrast to other proteins of the family, it does

d:30970241). Regulates the morphology, size and distribution of LDs (PubMed:31293035, Pub lasmic reticulum and translocate inorganic phosphate into the opposite direction. Independent d amyloid-beta protein 42), without affecting the cleavage of other gamma-secretase targets su

as a guanine nucleotide exchange (GEF) of RAB5B, required for activating the RAB5 proteins he formation of thin, actin-rich surface projections called filopodia. Functions cooperatively with l). Inhibition of mTORC1 is mediated by a pathway that involves DDIT4/REDD1, AKT1, the TS( ible factor (HIF) alpha proteins. Hydroxylates a specific proline found in each of the oxygen-dep n cultured cells. Regulates cAMP-induced GFAP gene expression via STAT3 phosphorylation (

rface. Hydroquinone oxidase activity alternates with a protein disulfide-thiol interchange/oxidore n the stimulation of transcription in a Ras-independent fashion (By similarity).

quired for the recruitment or accumulation of SETDB1 to the endogenous retroviruses (ERVs)

populations have found an association between polymorphisms in this gene and sporadic amyloidosis. High-affinity binding of a stem-loop structure in their 5' UTR. This regulation requires VIM and Nucleolin to form a complex that mediates the flow of ion (By similarity).

[RefSeq, Jul 2008]

11-kDa protein, which enhances viral replication. RNA-binding protein that specifically binds to the 5' UTR of the mRNA of the viral protein, which is essential for viral replication. Mediates dendritic spine morphogenesis in Purkinje cells and in hippocampal neurons, via a CDC42-mediated pathway.

with shorter fatty acyl-CoA substrates (PubMed:15220348). It may play a role in the production of ceramide in the brain.

in the brain.

(PubMed:1281216). The physiological relevance of this observation is unknown (Probable).

in its target gene promoters. Associates with cyclin D1 promoter containing Myc E-box sequence.

as a facilitator of neurite branching. Regulates neurite fasciculation, branching and extension in neurons.

in the endoplasmic reticulum (ER) (By similarity). Contains unique domains for binding cholesterol and the PM, thereby mediating the transport of cholesterol to the PM.

to lysosomes via multivesicular bodies. E3 ubiquitin ligases accept ubiquitin from an E2 ubiquitin-conjugating enzyme (PubMed:26388029). Enhances the USP1-mediated deubiquitination of FANCD2; USP1 being almost exclusively expressed in the brain. Associated with the pathogenesis of late onset Alzheimer disease, and emphysema distribution. [provided by RefSeq, Mar 2017]

lysosome assembly. Plays a role as an effector in the TP53-dependent apoptotic pathway (By similarity). Converts pyruvate to 3-methylglutaconyl-CoA, a critical step for leucine and isovaleric acid catabolism.

to generate fructoselysine-3 phosphate (PubMed:11016445, PubMed:11522682, PubMed:11975445). Ubiquitin-protein ligase activity is essential to customize longer precursor peptides to fit them to the correct leucine residue. Ubiquitin-protein ligase activity transfers the ubiquitin to targeted substrates. Interacts with SMAD1 and SMAD7 in order to trigger the ubiquitination of SMAD1 and SMAD7.

ired to ensure functional dimerization of BTB domain-containing proteins (dimerization quality c

f damaged mitochondria via selective autophagy (mitophagy) by mediating activation and trans  
) . When unphosphorylated, induces cell migration (By similarity). When phosphorylated by MAI

ion. Acts as an activator and inhibitor of sodium-coupled chloride cotransporters and potassium  
s alpha/beta hydrolase fold and secretory lipase domains. [provided by RefSeq, Jul 2008]

gulation of cytoskeletal organization via Rho family GTPases. Inhibits PAK2 proteolytic fragme  
and regulates its activity. Suppresses the rate at which PP1 dephosphorylates (inactivates) gly  
PubMed:18070604). Involved in the functional recruitment of the class 1 Sin3-histone deacetyl  
gos into multivesicular bodies. May be involved in cell growth and differentiation.

e GTP. Required for normal RAB31 function.

ed:17461779). Regulates the activity of the mTORC2 complex in a substrate-specific manner p  
osis system.||Possible role in axon guidance through interaction with RTN4R.

ie that increases the stability of TP53 protein by promoting the ubiquitination and degradation c

lases to gene promoters. Regulates cell adhesion, migration and proliferation. May be required  
icking and/or retention of GLI2 and GLI3 proteins at the ciliary tip (By similarity).

ne preference toward medium-chain substrates (PubMed:17762044). Plays a role in adipocyte  
er mediated cell lysis as well as a role of marker for detection of neuroblastoma cells. May be ir  
lamination and retention of neural stem cells from the subventricular zone during neurogenesis  
tem and is required to the efferent innervation of hair cells in the olivocochlear bundle for the m  
and epithelial polarization by controlling the polarity, plasticity, duration and extent of protrusio

by promoting proteasomal degradation of the repressor SOCS1 (PubMed:12163497). Plays a

es to regulate mitochondrial quantity and quality by eliminating the mitochondria to a basal leve  
(PubMed:28028151, PubMed:22461490). During immune responses, required for interstitial d  
a modulator of autophagosome formation.

ndothelium and blocks further differentiation into blood precursors (By similarity). May be requir



ay. Plays a role in homeostatic control of innate immunity and in antiviral defense mechanisms  
hesion of cells to type 1 collagen and gelatin, reorganization of the actin cytoskeleton and promo

ntial to the formation of functional clathrin-coated pits. Has a preference for membranes enriched  
aratus volume and pH.

er a preference for FAHFs with branching distal from the carboxylate head group of the lipids (  
33, PubMed:23332125, PubMed:23474714, PubMed:25043379). In contrast to PARP1 and P/  
eraction with ITGB5 and modifying ITGB5 cytoplasmic tail interactions such as with FERMT2 a  
n light chain.

me membranes, may act as a downstream effector of Rab proteins recruiting cytosolic proteins

the postsynaptic membrane (By similarity).

tion and cell motility. Acts a tumor suppressor in hepatocellular carcinoma cells.  
d by RefSeq, Aug 2013]

).

tein lacks the metalloproteinase and disintegrin-like domains, which are typical of the ADAMTS

ycan/BGN and fibronectin/FN1. Inhibits signaling mediated by TGF-beta family proteins possib  
l.

3. This gene is one of several chemokine-like factor genes located in a cluster on chromosome  
inus, separated by a large body of repeats. The N-terminal PSD-95/Discs-large/ZO-1 (PDZ)-like  
oid-induced apoptosis. Single nucleotide polymorphisms in this gene are associated with a deci

spindle organization (PubMed:19734894, PubMed:28370826). Necessary for radial and tanger

ring early development. Also required for proper mitosis progression.

increases affinity for ACh of alpha-4:beta-2-containing nAChRs. May play a role in the intracellular signaling pathway involving F2A and MEF2C. Also represses expression of proinflammatory cytokines such as TNFA and occludin. Also represses expression of occludin and cell-cell junctional tight junctions.

Overexpressed in transformed cells, may promote mesenchymal to epithelial-like changes and inhibit cell migration. This gene was identified as a potential candidate gene for obsessive-compulsive disorder in mice. Also involved in the maintenance of stem cells in the central nervous system (By similarity).

Involved in the development and maintenance of odontoblasts as well as in dentin formation.

Involved in the maintenance of microtubule dynamics during interphase and in their reassembly at the end of mitosis (PubMed:17030000).

Mediates the ubiquitination and subsequent proteasomal degradation of target proteins. Recognizes and binds to a variety of substrates.

Involved in the regulation of cell adhesion and migration. Supports adhesion of cerebellar neurons to the extracellular matrix.

Involved in the regulation of cell cycle entry and cell cycle progression.

Involved in the suppression of Ras-induced cellular transformation and Ras-mediated activation of ELK1. Plays a role in the regulation of cell cycle entry and cell cycle progression.

Involved in promoting the degradation of SH3RF1, a scaffold protein that is required for pro-apoptotic JNK1 activity.

Involved in the regulation of cell cycle entry and cell cycle progression. May function as an inhibitor of transactivation by HIF1A by disrupting HIF1A interaction with CREB1.

Involved in the regulation of the TNF-alpha-induced signaling pathway (By similarity).

n white adipose tissue.

20721, PubMed:30624931). Phosphorylates inositol 1,4,5-trisphosphate (Ins(1,4,5)P3) first to i

es the neoplastic transforming activity of CTNNB1 (By similarity).

ored proteins mainly found in cells associated with the immune system. The SRCR family is de  
er and Thr residues with very low efficiency (in vitro). Acts as MAP2K1/MEK1-dependent allostr  
l protein has been found in lysosomal membranes, where it can transport catabolites from the l  
s (ADAMs), NADPH oxidases (NOXs) and phosphoinositides. Acts as an organizer protein that  
arity). Acts as a bone morphogenetic protein (BMP) coreceptor that potentiates BMP signaling  
(By similarity). Does not exhibit calcium-activated chloride channel (CaCC) activity (PubMed:22  
PubMed:16940153, PubMed:18945876, PubMed:20207939, PubMed:20089856). Ceramides, s  
or threonine residue on the protein receptor.

s the kinase the ability to determine its own scaffold to control the effects of their kinase activitie  
ducing effect. All 'z' splice variants (z+) of this fragment also show an increase in the number of

modeling in response to extracellular stimuli, cell motility and adhesion, receptor endocytosis, a  
). Probably involved in vesicular trafficking via its association with the CART complex. The CAR  
: kinase activity. Plays an important role in cellular energy homeostasis and in adenine nucleoti  
9073142, PubMed:19766732, PubMed:23416111, PubMed:24767988). Efficiently phosphoryla  
way of alcohol metabolism. Two major liver isoforms of aldehyde dehydrogenase, cytosolic and

for the formation of T-tubules, tubular invaginations of the plasma membrane that function in cardiac inner membrane.

binds calcium ions with high affinity. May be involved in heat-stress response. Inhibits PCSK9-enhanced calcium ions with high affinity. May be involved in heat-stress response.

induces caspase-3 and apoptosis. This activation requires ATP. Isoform 6 is less effective in inducing apoptosis. May modulate processing of the amyloid-beta precursor protein (APP) and hence formation of the amyloid-beta complex with the gamma-secretase-derived amyloid precursor protein (APP) intracellular domain. May interact with cellular G-protein signaling pathways. May bind to the DNA 5'-GTCACATG-3' (CDEI binding site). *In vitro*, can reduce Cu(2+) and Fe(3+) to Cu(+) and Fe(2+), respectively. Amyloid-beta protein 42 is a substrate. Serves as a microtubule-dependent signal that is required for the myosin contractile ring formation. May interact with RhoB and RhoG proteins, both of which show a growth-regulated expression in mammalian cells. Guides the V-type ATPase into specialized subcellular compartments, such as neurosecretory vesicles. Guides the V-type ATPase into specialized subcellular compartments, such as neurosecretory vesicles. Required for efficient replication of a subset of genomic loci. Binds to DNA tandem repeat sequences and coordinates a diverse range of cellular pathways such as DNA damage repair, ubiquitination, and transcription. The protein contains multiple copies of three enzymatic components: branched-chain alpha-keto acid decarboxylase, the N-terminal region of the gene product is disrupted, which is thought to be related to the formation of mitochondrial tubular networks, respiratory chain assembly and formation of the LETM1 complex. Traffics via the heterodimeric receptor formed by NGFR and SORCS2 (PubMed:24908487, PubMed:28935373). Involved in altering the calcium regulation of MIP water permeability (PubMed:22080952, PubMed:26195724). Binding to the cell surface, mediating nascent virions to the membranes of infected cells. Acts as a direct physical tether, holding

is required for axonal growth during development and for retrograde synaptic signaling at mature synapses and signal transduction.

has been proposed to be involved in muscle protein degradation in living tissue.

interacts with p53 and lamins. Overexpression promotes programmed cell death.

promotes the growth of cells including T-cells, B-cells, myeloid leukemia cells, melanoma cells, mastocytoma cells, and is involved in cell adhesion through recognizing the core consensus binding sequence 5'-TGTGGT-3', or very rarely, 5'-TGTGGT-3'. Plays an important role in memory formation and synaptic plasticity in the hippocampus (By similarity). Interacts with other cell surface proteins; cadherins may thus contribute to the sorting of heterogeneous cell types. May play a role in cell cycle regulation. Interacts with RB/RB1 and NPM1. Interacts with D-type G1 cyclins during interphase at G1 to form a pRB/RB1 complex. May interact with cyclins D and to phosphorylate the retinoblastoma protein. ||Capable of inducing cell cycle arrest. Interacts with retinoblastoma protein RB.

is an effector of EPHA4 in axon guidance.

acidification of the endosome lumen. May play an important role in renal tubular function. (PubMed:11123922, PubMed:15339). Prevents stress-induced aggregation of blood plasma proteins (PubMed:11123922, PubMed:15339). Prevents stress-induced aggregation of blood plasma proteins (PubMed:11123922, PubMed:15339). Also component of the endothelia of blood vessels. Necessary for migration of leukocytes and the regulatory B-type carboxypeptidase subfamilies. Carboxypeptidase D has been identified

element fixation through its calcium-dependent binding to phosphorylcholine. Can interact with integrins

under a wide range of stress conditions.

activity.

Mediates heparin- and divalent cation-dependent cell adhesion in many cell types including fibroblasts. Is linked to the actin filament network, and which seems to be of primary importance for cadherin-mediated cell-cell adhesion which leads to APP degradation (PubMed:27333034). Involved in the pathogenesis of several diseases (By similarity).

Localization at immunological synapses (IS) and for the recruitment of the chemokine receptor CXCR4 to the protein complex which accumulates at the neuromuscular junction (NMJ) and at a variety of synapses. Leaving long flaps that escape FEN1: flaps that are longer than 27 nucleotides are coated by replication fork proteins (RFC/CRKL) regulation of epithelial and endothelial cell spreading and migration on type IV collagen. Acts as a positive regulator of T-cell coactivation, by binding at least ADA, CAV1, IGF2R, and PTEN.

and promotes angiogenesis. Inhibits MMP9 proteolytic activity.

of mRNA in presence of EIF-4F and ATP. Promotes the ATPase activity and the ATP-dependent assembly of the cytoskeleton, integral membrane channels and membrane-associated guanylate kinases.

erythropoietin-induced erythroblast proliferation and differentiation. Upon EPO stimulation, EPOR dimerizes. The imperfect 5'-AGGTCA-3' direct or inverted repeats with various spacings which are also repeated in other regions.

provides a critical bridge between the FA complex and FANCD2.

a beta-oxidation (PubMed:24269233, PubMed:22633490). Preferentially uses palmitoleate, oleic acid (PubMed:22633490). Required for the incorporation of fatty acids into phosphatidylcholine, the normal function of beta-oxidation (PubMed:24269233, PubMed:22633490, PubMed:21242590). Preferentially associated with elastin or in elastin-free bundles. Fibrillin-2-containing microfibrils regulate the early process of embryonic development, cell proliferation, differentiation and migration. Required for normal mesoderm development.

beta-oxidation (PubMed:24269233, PubMed:22633490, PubMed:21242590). Preferentially associated with elastin or in elastin-free bundles. Fibrillin-2-containing microfibrils regulate the early process of embryonic development, cell proliferation, differentiation and migration. Required for normal mesoderm development.

VA replication, cleaves the 5'-overhanging flap structure that is generated by displacement synthesis. Involved in embryonic development, cell proliferation, differentiation and migration. Required for normal mesoderm development.

s. May be involved in epidermal cell adhesion and epidermal structure and function.

ment of embryonic vasculature, the regulation of angiogenesis, cell survival, cell migration, macrophage function and the carbohydrate moieties of glycoproteins.

classic ligand-driven signal transduction cascades, resulting instead in chemokine sequestration). Has highest activity on alpha-1,4-linked glycosidic linkages, but can also hydrolyze alpha-1,6-galactan sulfate, and chondroitin 6-sulfate. Sequence alterations including point, missense and nonsense mutations. Required for the T-helper 2 (Th2) differentiation process following immune and inflammatory stimuli. Mucin-type core 2 O-glycans play an important role in leukocyte adhesion. Has no beta-galactosidase catalytic activity, but plays functional roles in the formation of extracellular matrix. Cofactor: pyridoxal phosphate; CO(2) is released and the remaining methylamine moiety is

involved in maintaining acid-base homeostasis. Regulates the levels of the neurotransmitter glutamate. Deficiency of this enzyme results in the accumulation of undegraded substrate and the lysosomal storage disease Hunter syndrome. Epithelial cell line A431 in culture. [[Granulin-7]: Stabilizes CTSD through interaction with CTSD

involved in regulation of transcription factors and microtubules, by phosphorylating and inactivating glycohydrolase. Promotes the formation of novel heparin regioisomers (PubMed:21046276).

Involved in signaling specific signal responsive activator complexes. Promotes the formation of stable high-order oligomers (PubMed:135828, PubMed:1550553, PubMed:29915090, PubMed:30850536). The mitochondrial beta-oxidation pathway is involved in the regulation of DNA methylation (PubMed:135828, PubMed:29915090, PubMed:30850536). The mitochondrial beta-oxidation pathway is involved in the regulation of DNA methylation. Methylation gives a tag for epigenetic repression and plays an important role in transcriptional regulation. May control silencing of the imprinted CDKN1C locus. Involved in regulation of over 40 genes, including erythropoietin, glucose transporters, glycolytic enzymes, vascular endothelial growth factor receptor 1 (VSDGGPNLY), HAdV-11 capsid L3/hexon protein (LTDLGQI), and others. Sequence motif at the C-terminus (PubMed:7743181). Presents a long peptide (APRGPHGGAASGL) derived

involved in heme synthesis by biliverdin reductase. Under physiological conditions, the activity of heme oxygenase is high. Involved in regulation of 5'-UTR of mRNA and modulates the stability and the level of translation of bound mRNA molecules. Involved in cell polarity on the anterior-posterior axis.

Involved in 3D activity. Uses NADH while EDH17B3 uses NADPH.

Involved in regulation of glycolytic and antidepressant drugs and other psychoactive substances, such as lysergic acid diethylamide. Involved in regulation of transcription factors by forming heterodimers and inhibiting their DNA binding and transcriptional activity.

Involved in regulation of cell growth (PubMed:10049744, PubMed:14532120, PubMed:15337770, PubMed:21854986). Functions in regulation of cell growth (PubMed:615558). Ligand binding stimulates activation of the JAK/STAT signaling pathway (PubMed:815558). Involved in regulation of cell growth. Mannose-6-phosphate residues bind specifically to mannose-6-phosphate receptors in the Golgi apparatus. Involved in regulation of cell growth. They alter the interaction of IGFs with their cell surface receptors. Present in regulation of cell growth. They alter the interaction of IGFs with their cell surface receptors. Also present in regulation of cell growth. They alter the interaction of IGFs with their cell surface receptors.

Th2 differentiation. The IL4/IL13 responses are involved in regulating IgE production and, the). Upon binding to IL18R1 and IL18RAP, forms a signaling ternary complex which activates NIT1 for fibronectin. It recognizes the sequence R-G-D in its ligand.

elopment, neural tube fusion process and hematopoiesis. Acts by modulating histone methylation in brain astrocytes, but also in kidney and in other tissues (PubMed:15820677, PubMed:2165322). Microtubules and to DNA (By similarity). Plays a role in congression of laterally attached chromosomes. Integral integrity of epithelial cells and are subdivided into cytokeratins and hair keratins. Most of the proteins of striated muscle.

orylation may also serve to regulate actin-associated ion transport activities, not only in the parietal cells. Phosphorylation of cofilin (CFL1). Serine/threonine-protein kinase that plays an essential role in

?) to produce Man(5)GlcNAc(2).

osidic linkages.

arides.

and vasoactive amines in the central nervous system and peripheral tissues. MAOA preferential

stiffening effect on microtubules.

and the promotion of mucosal healing. Promotes VEGF-dependent neovascularization (By similarity). Stimulates proliferation of epithelial cells and angiogenesis, at least in part by promoting the release of the growth factor FGF2

38535). Biologically important in the destruction of opioid peptides such as Met- and Leu-enkephalin. Involved in stress signaling with activation of the pro-inflammatory NF-kappaB, NFAT and IRF transcription factors.

r thiosulfate biosynthesis. Acts as an antioxidant. In combination with cysteine aminotransferase, promotes cell spreading, plays an important role in cytoskeleton reorganization, focal contacts formation and cell migration. Interacts with LARP6 in the stabilization of type I collagen mRNAs for COL1A1 and COL1A2. During cell

in trafficking, and especially in the transfer of cargo proteins from early to recycling endosomes. Myosin 6 is a reverse-direction motor protein that moves towards the minus-end of microtubules. Involved in the replication of adenovirus type 2. These proteins are individually capable of activating transcription factors that are initiated by a vast array of stimuli related to many biological processes such as inflammation. Upon ligand activation through the released notch intracellular domain (NICD) it forms a complex with CSL, playing a key role in cardiovascular homeostasis. Has guanylate cyclase activity upon binding to collagen and regulates cell differentiation, remodeling of the extracellular matrix, cell migration and

e nucleotide exchange factor which binds to and activates alpha subunits of guanine nucleotid

is inhibitor which inhibits thrombin, neuropsin and chymotrypsin but not trypsin, tissue type plas  
with Gbeta-Ggamma and RGS-Gbeta5 heterodimers. ||[Isoform 2]: Acts as a negative regulator c  
d-BH2. Coactivator for HNF1A-dependent transcription. Regulates the dimerization of homeod  
tions in the brain.

sus motif. Likely functions in the constitutive and regulated secretory pathways. Plays an esser

OP to NADPH.

olysis-independent signal transduction activation effects of U-PA. It is subject to negative-feedb  
s required for normal assembly and cross-linking of collagen fibrils (By similarity). Forms hydro:  
anced by the permanent PML-NB-associated protein DAXX or by the recruitment of p53/TP53  
cle types. The protein binds to an A/T-rich element in the muscle creatine enhancer (By similar  
cerol-3-phosphocholine (16:0/18:1-GPC). Activated by oleylethanolamide, a naturally occurring  
)-mediated signals (PubMed:15671020, PubMed:18838687, PubMed:19154138, PubMed:2346  
polymerase-primase complex) which play an essential role in the initiation of DNA synthesis (Pu  
lar energy metabolism. In response to reduction of intracellular ATP levels, AMPK activates en  
enzyme after the cAMP-induced dissociation of its regulatory chains.

egative regulation of cell proliferation, apoptosis, differentiation, migration and adhesion, tumor  
ests that may include CREB, SMAD6 and PKD1 and has multiple functions in cellular differentiat  
onal myelin sheath maintenance. May promote myelin homeostasis through acting as an agonis  
event coagulation and stimulating fibrinolysis.

s a Gla domain at the N-terminus, preceded by a propeptide sequence required for post-transla  
ments further induce synovial cells to up-regulate MMP1 and MMP3 production. May also degra  
R37 and GPR37L1, undergoing ligand-mediated internalization followed by ERK phosphorylatio  
integral membrane proteins such as Notch receptors and APP (amyloid-beta precursor protein)  
and Glu adjacent to the leaving group at neutral or slightly basic pH. The proteasome has an A1  
eneration of class I binding peptides by altering the cleavage pattern of the proteasome.

ergetic metabolism by promoting COX activity and ATP production, via collaboration with isoform  
alcium second messenger system. May play a role as an important modulator of renal function  
the affinity constant. Functional coupling with the prostaglandin F2-alpha receptor seems to oc  
expression can attenuate the nuclear accumulation of LPXN and limit its ability to enhance seri  
cell migration, cell growth and also regulates TGF-beta gene expression, thereby modulating epit  
or of EGFR signaling pathway. Forms complexes with beta-catenin and gamma-catenin/plakogl  
ation of 7,8-dihydroneopterin triphosphate into 6-pyruvoyl tetrahydropterin.

ases. Interacts and acts as an effector molecule for R-Ras, H-Ras, K-Ras, and Rap.



:26503625). Shows phospholipase A1 (PLA1) and A2 (PLA2), catalyzing the calcium-independent (DSB) repair through the homologous recombination (HR) pathway. HR is restricted to S and

ifferentiation of nodal monocilia and left-right asymmetry specification during embryogenesis. Rec into their inactive GDP-bound form. Down-regulates G-protein-mediated release of inositol phospholipid (0)-Leu-enkephalin, Arg(0)-Met-enkephalin and Arg(-1)-Lys(0)-somatostatin-14. Can hydrolyze microtubule filaments and cell contractility. Plays an important role in photoreceptor integrity. May play a role in cell stress-induced activation of the transcription factors CREB1, ETV1/ER81 and NR4A1/NUR77.

22660413).

cytoskeleton and the extracellular matrix.

PubMed:10391915, PubMed:10574970, PubMed:11311135). The precise substrate specificity determines the regulation of cytoplasmic Ca(2+) levels and Ca(2+)-dependent cellular processes (PubMed:13741111) and cell volume.

. Component of SWI/SNF chromatin remodeling complexes that carry out key enzymatic activities.

p40. Stabilizes the ADP state of HSC70 that has a high affinity for substrate protein. Through its interaction with cytokines and other growth factors. Following type I IFN (IFN-alpha and IFN-beta) binding to cell surface receptors and estrone (PubMed:7779757, PubMed:11884392, PubMed:11006110). Is a key enzyme in the regulation of lymphocyte migration by mediating phosphorylation of ERM proteins such as MSN and the release of soluble JAM3 from endothelial cells surface (PubMed:20592283). Responsible for transcriptional repression (PubMed:14980219). Plays an essential role in transcription activation mediated by nuclear receptors.

ively. Plays a role in cell protection against oxidative stress by detoxifying peroxides and as serine protease. The motif 'C[CG]CGC-3', found in the promoter region of a number of genes whose products are involved in the regulation of the TGF-beta cytokines TGFB1, TGFB2 and TGFB3. Transduces the TGF-beta signal to functional adhesion molecules, and occludin to the actin cytoskeleton (PubMed:7798316, PubMed:11006110). Are cell-surface proteins that are characterized by the presence of four hydrophobic domains. The TRAF1/TRAF2 complex recruits the apoptotic suppressors BIRC2 and BIRC3 to TNFRSF1A signaling ways to the cytoskeleton.

strand breaks.

and cell type. Involved in cell cycle regulation as a trans-activator that acts to negatively regulate cell cycle progression. Defects in this gene are a cause of sudden infant death with dysgenesis of the testes syndrome. Prevents the binding of membrane lipids (By similarity).

is cyanide, can act as sulfur ion acceptors. Also has weak mercaptopyruvate sulfurtransferase activity and a reductase reaction.

sides or purine ribonucleosides. Can use ATP or GTP as a phosphate donor. Can also phosph regulated by proteolysis.

L. May participate in regulating the subcellular localization of WASL, resulting in the disassemb sites overlapping the transcription start site. Binds to the consensus sequence 5'-CCGCCATN

; by mediating ubiquitination of DDX58 and IFIH1 (PubMed:17392790, PubMed:30193849). Me phosphorylation of AKT1 at 'Ser-473'.

ular Reelin signal to intracellular signaling processes, by binding to DAB1 on its cytoplasmic tail a non-exchangeable site on the alpha chain.

actor Xa. Has no effect on thrombin.

translation of certain mRNAs (By similarity).

has been found, but its biological validity is not determined. [provided by RefSeq, May 2010]

and MCM3.

he acrosome reaction in the sperm. Involved in follicular atresia, the breakdown of immature ov of EIF2S1 phosphorylation by promoting its dephosphorylation by PP1. Plays a role in ELK1-d rate.

PubMed:11825900). Contributes to the regulation of nerve signaling, and prevents neuronal hyp frequent viral fusion and release of viral contents into the cytosol. Active against multiple viruses, dependent manner. May be required for efficient terminal myeloid maturation of hematopoietic ce round form. Binds selectively to G(z)-alpha and G(alpha)-i2 subunits, accelerates their GTPase phosphate esters including phosphatidate/PA, lysophosphatidate/LPA, sphingosine 1-phosphate at are subsequently sensed by TLR8 (PubMed:31778653). Cleaves preferentially single-strand tions in the brain.

hrenequinone (PQ) and the oxidation of 9-alpha,11-beta-PGF2 to PGD2. Functions as a bi-dir ed radial glial cells (RGCs), by allowing their daughter cells to choose progenitor over neurona PubMed:10988299, PubMed:11739745, PubMed:16076287, PubMed:19759537, PubMed:214788

vasion and metastasis.

ypic intraepithelial cell/T-cell interactions and homotypic T-cell aggregation. Inhibits beta-1 integ rmation by the adenovirus E1A protein. The transcriptional control activity of cell growth require affinity receptor for semaphorins 3C, 3F, VEGF-165 and VEGF-145 isoforms of VEGF, and the ) be a negative regulator in the growth hormone/IGF1 signaling pathway. Probable substrate re ound retinal. Can metabolize octanal and decanal, but has only very low activity with benzalde e. Acts also as an ERK downstream effector mediating survival. As a member of the NUPR1/R and cell spreading. Promotes targeting of RAC1 to focal adhesions (By similarity). May functio



d 3-alpha-androstanediol to dihydroxyprogesterone (PubMed:11294878, PubMed:29541409). F

ation, growth, proliferation or cell survival. Activation by various effectors including growth factor  
s of the neuronal silencer REST and induces the activation of neuronal-specific genes. Involve  
unsubstituted terminals into amino acids. May play a role in the liberation of thyroxine hormone

nulating hormone (FSH).

ransmitter release by acting in synaptic vesicle priming prior to vesicle fusion and participates in  
crofibrils and ELN (PubMed:18185537). Stabilizes and organizes elastic fibers in the skin, lung  
. Involved in formation of actin stress fibers and focal adhesions (By similarity).

quent viral fusion and release of viral contents into the cytosol. Active against multiple viruses,  
iated via its action on PABPC1. Competes with PAIP2 for binding to PABPC1. Its association w  
-strand break repair. Functionally cooperates with PALB2 in promoting of D-loop formation by I  
llular processes. Isoform 1, isoform 2 and isoform 3 phosphorylate CAMK1 and CAMK4. Isofor  
cting cell death.||Guanine nucleotide-binding protein that plays a crucial role in the cellular resp  
n of the signaling initiated by the G protein coupled receptors (GPCRs) by accelerating the GTI  
osis and may play a role in the trafficking and distribution of IF proteins and other cellular factor:

e activated by a variety of naturally occurring or synthetic FMRF-amide like ligands. This recep  
ic acid to increase water solubility and enhance excretion. They are of major importance in the  
eracts with cellular components, and possesses weak ATPase activity. May be a chaperone-like  
olded non-glycosylated proteins as well as improperly folded glycoproteins, retain them in the E  
in abundance through the cell cycle. Cyclins function as regulators of CDK kinases. Different c

ose (GDP-Man) pooled in the cytosol into the lumen of the Golgi in exchange for the correspon  
877).

er ovulation was induced. Alternative splicing results in multiple transcript variants. [provided by

ackaged into autophagosomes and delivered to lysosomes for degradation (PubMed:23435086  
) for GTP nucleotide exchange ability (PubMed:28625565). Involved in ciliary assembly by bind  
31159).

r.

s. Catalyzes the formation of the GlcNAcbeta1-4 branch on the GlcNAcbeta1-2Manalpha1-3 ar  
apping the barbed ends of filaments, it also regulates motility. Seems to play an important role  
y.

APP, stabilizes APP metabolism and enhances APBA2-mediated suppression of beta-APP40

on (PubMed:21706167). In addition, has a role in translesion DNA synthesis. Requires for UV-i  
; heterodimer to form a heterotrimeric KIF3 complex and may regulate the membrane binding c  
) . Rab3 proteins are involved in regulated exocytosis of neurotransmitters and hormones. Spec  
wards PGE1, PGE2 and PGE2-alpha (By similarity). Catalyzes the conversion of leukotriene B  
tion reaction rather than in the elongation step (By similarity). Required for CCSAP localization  
required for transcriptional activation by DNA binding transcription factors of genes transcribed b  
8042621). Required for localization of CDK5RAP2 to the centrosome during interphase (PubM  
EIF4E-FMR1 complex this subunit is an adapter between EIF4E and FMR1. Promotes the tran  
nt degradation of core histones during spermatogenesis and DNA damage response. Recogni  
roprotective function. May play a role in neuronal rapid ischemic tolerance.

ts in multiple transcript variants. [provided by RefSeq, Mar 2014]  
in-like complex.

O), influencing both its stability and activity in leukotrienes synthesis.

GRK1 (RHOK), but not GRK2 to GRK5. Can substitute for calmodulin (By similarity). Stimulates

AIT (gamma interferon-activated inhibitor of translation) complex which mediates interferon-gar  
tion of RAC1 (PubMed:25074804, PubMed:25925950). Increases the presence of activated R/  
CBLC, modulates the rate of RET turnover and may act as regulatory checkpoint that limits the  
53/TP53, CDKN1A and TERT. Keeps cells alive by suppressing p53/TP53 under normal condi  
; cytoplasm in response to TGF-beta. Acts as an adapter that mediates the specific recognition

s via the degradation of nucleic acids, by reducing the concentration of ssDNA able to stimulate

nselfes (PubMed:8932385). However, they seem to serve as transcriptional activators by dime

BXL2), which mediates the ubiquitination and subsequent proteasomal degradation of target p  
has ATPase activity; the force-producing power stroke is thought to occur on release of ADP. F  
to the regulation of dendritic spine morphogenesis (By similarity).

; exocytosis. May regulate V-ATPase intracellular transport in response to extracellular acidosis  
sperm polarity and normal spermatid adhesion. May also promote integrity of Sertoli cell tight j

similarity). May be involved in apoptosis regulation. Necessary for signal transduction through th  
oly involved in the transition from an active state to a repressed state in embryonic stem cells: a

roteasomal degradation of target proteins. The Cul7-RING(FBXW8) complex mediates ubiquit

dependent degradation of key sarcomeric proteins, such as alpha-actinin (ACTN2) and filamin-3708001, PubMed:23708605, PubMed:16921029). During mitotic cell cycle plays a role as bot

for early limb outgrowth and patterning in maintaining the FGF4-SHH feedback loop. Down-reg

on of cardiac genes. Induction seems to be correlated with apoptotic cell death in hepatoma ce  
ynthesis occurs within the dendrite, the localization of specific mRNAs to dendrites may be a pr  
required for pluripotency and decreases expression of differentiation-associated genes. Has c  
rT3, and of estrone-3-sulfate and taurocholate.

as transport of tubulin within the cilium. Binds tubulin via its CH (calponin-homology)-like region  
on of the short actin protofilament, which in turn defines the geometry of the membrane skeletc

factors, such as ARHGEF6. Is involved in the reorganization of the actin cytoskeleton and form  
by cGAMP (PubMed:25299331). The function in innate immune response is probably indepen  
esses, such as alternative splicing of mRNAs and X chromosome inactivation mediated by Xist

utes the predominant proteoglycan present in cartilage and is distributed on the surfaces of ma  
(By similarity). Does not exhibit calcium-activated chloride channel (CaCC) activity (PubMed:22  
AMP phosphotransferase and ITP:AMP phosphotransferase activities.

d NF-kappa-B pathways. Following viral infection, UBXN1 is induced and recruited to the RLR c

toward histone H4 (PubMed:16387653). Through chromatin acetylation it may function in DNA  
yltransferase activity in vitro.

A, and regulates its levels by promoting mRNA decay. RNA binding is sufficient to prevent tran

2 (PubMed:18056426).||Component of the eukaryotic translation initiation factor 3 (eIF-3) comp  
cellular energy metabolism. In response to reduction of intracellular ATP levels, AMPK activat  
s from the endoplasmic reticulum (ERAD).

nhibits membrane ruffling. Inhibits actin filament depolymerization. Bundles actin filaments, del  
anonical Wnt signaling activity in neural stem cells (By similarity). Required for DNA damage-in

1 and subsequent proteasomal degradation of the transcription factor HBP1 (PubMed:2991197  
Ca(2+) elevation after endoplasmic reticulum Ca(2+) refilling, promotes a slow inactivation of S  
or of the non-canonical Wnt signaling pathway, acting downstream of WNT5A, MAP3K7/TAK1  
1025 (CAB39/MO25alpha or CAB39L/MO25beta) and STK11/LKB1.

an anti-recombinase to counteract toxic recombination and limit crossover during meiosis. Regulates peptide trimming is essential to customize longer precursor peptides to fit them to the correct lectin in pancreatic beta cells (PubMed:21853325). Is a downstream transcriptional target of p53/TP53, and acts in various tissues and is involved in processes like cell differentiation, cell migration and cell survival. Transfers RNA export, the cap binding complex (CBC)-bound snRNA on the one hand and the GTPase Ran on the other as substrates. It can phosphorylate a large number of proteins. Participates in Wnt signaling pathway by converting UDP-alpha-D-galactose to lactosylceramide/beta-D-galactosyl-(1->4)-beta-D-glucosyl-(1->3)-galactose; ERBB2, ERBB3 and ERBB4. Inhibits EGFR catalytic activity by interfering with its dimerization.

regulates the properties and mechanical stability of tight junctions (By similarity). Has no peptidase activity (PubMed:12547821).

Interacts with RAB11A, RAB3IP, RAB8A, PARD3, PRKCI, ANXA2, CDC42 and DNMBP promotes transcription of primary endothelial cell migration by Slit proteins (By similarity). Involved in the maintenance of the sonic hedgehog (SHH) pathway regulation. May play a role in neurite outgrowth. May act as a negative regulator of PAX6 expression (PubMed:26394807).

Acts as a negative regulator of PAX6 expression (PubMed:26394807). May also play an important role in early urinary-tract development (PubMed:31057431). Promotes PINK1/PRKN-mediated mitophagy in response to mitochondrial depolarization.

Acts as a cofactor for 9-cis, 11-cis or 13-cis-retinol isomers. May play a role in the metabolism of vitamin A. Independent of the retinoid X receptor.

Acts as a cofactor for 'Lys-48'-linked polyubiquitination. May be involved in degradation of katenin.

Phosphorylates p44-ERK1 (MAPK3) but not p54 SAPK-beta (MAPK10) in vitro. Able to enhance activation of ERK1.

Acts as a cofactor for the spliceosome. Thereby, plays an important role in the splicing of cellular pre-mRNAs. Most spliceosomal proteins are a class of autosomal recessive, neurodegenerative disorders affecting children. The genes responsible for these disorders are

located on chromosomes 1, 10, 15, 17, 18, 19, 21, 22, 23, 24, 25, 26, 27, 28, 29, 30, 31, 32, 33, 34, 35, 36, 37, 38, 39, 40, 41, 42, 43, 44, 45, 46, 47, 48, 49, 50, 51, 52, 53, 54, 55, 56, 57, 58, 59, 60, 61, 62, 63, 64, 65, 66, 67, 68, 69, 70, 71, 72, 73, 74, 75, 76, 77, 78, 79, 80, 81, 82, 83, 84, 85, 86, 87, 88, 89, 90, 91, 92, 93, 94, 95, 96, 97, 98, 99, 100. The genes responsible for these disorders are

located on chromosomes 1, 10, 15, 17, 18, 19, 21, 22, 23, 24, 25, 26, 27, 28, 29, 30, 31, 32, 33, 34, 35, 36, 37, 38, 39, 40, 41, 42, 43, 44, 45, 46, 47, 48, 49, 50, 51, 52, 53, 54, 55, 56, 57, 58, 59, 60, 61, 62, 63, 64, 65, 66, 67, 68, 69, 70, 71, 72, 73, 74, 75, 76, 77, 78, 79, 80, 81, 82, 83, 84, 85, 86, 87, 88, 89, 90, 91, 92, 93, 94, 95, 96, 97, 98, 99, 100. The genes responsible for these disorders are

located on chromosomes 1, 10, 15, 17, 18, 19, 21, 22, 23, 24, 25, 26, 27, 28, 29, 30, 31, 32, 33, 34, 35, 36, 37, 38, 39, 40, 41, 42, 43, 44, 45, 46, 47, 48, 49, 50, 51, 52, 53, 54, 55, 56, 57, 58, 59, 60, 61, 62, 63, 64, 65, 66, 67, 68, 69, 70, 71, 72, 73, 74, 75, 76, 77, 78, 79, 80, 81, 82, 83, 84, 85, 86, 87, 88, 89, 90, 91, 92, 93, 94, 95, 96, 97, 98, 99, 100. The genes responsible for these disorders are

located on chromosomes 1, 10, 15, 17, 18, 19, 21, 22, 23, 24, 25, 26, 27, 28, 29, 30, 31, 32, 33, 34, 35, 36, 37, 38, 39, 40, 41, 42, 43, 44, 45, 46, 47, 48, 49, 50, 51, 52, 53, 54, 55, 56, 57, 58, 59, 60, 61, 62, 63, 64, 65, 66, 67, 68, 69, 70, 71, 72, 73, 74, 75, 76, 77, 78, 79, 80, 81, 82, 83, 84, 85, 86, 87, 88, 89, 90, 91, 92, 93, 94, 95, 96, 97, 98, 99, 100. The genes responsible for these disorders are

located on chromosomes 1, 10, 15, 17, 18, 19, 21, 22, 23, 24, 25, 26, 27, 28, 29, 30, 31, 32, 33, 34, 35, 36, 37, 38, 39, 40, 41, 42, 43, 44, 45, 46, 47, 48, 49, 50, 51, 52, 53, 54, 55, 56, 57, 58, 59, 60, 61, 62, 63, 64, 65, 66, 67, 68, 69, 70, 71, 72, 73, 74, 75, 76, 77, 78, 79, 80, 81, 82, 83, 84, 85, 86, 87, 88, 89, 90, 91, 92, 93, 94, 95, 96, 97, 98, 99, 100. The genes responsible for these disorders are

road-complex, Tramtrack and bric a brac/Pox virus and Zinc finger), both of which are typically early endosome and the delivery to the Golgi apparatus.||Acts as component of the retromer cargo phospholipids from the outer to the inner leaflet of various membranes and ensures the maintenance role in regulating the actin cytoskeleton and cell shape (By similarity).

LL2 elongation activities. Potent inducer of apoptosis in prostatic and non-prostatic cell lines. Inhibits cell proliferation in the brain.

participate in the control of cell cycle progression and genomic stability.

rate-limiting enzyme in the synthesis of cytosine nucleotides.

of non-reducing N-acetylglucosamine (GlcNAc) residues. Preferentially acts on mannose-linked oligosaccharides as an actin nucleation factor and promotes assembly of actin filaments together with SPIRE1 and

2A) by incorporating an acyl moiety at the sn-2 position of the glycerol backbone (PubMed:2117345).

regulates various physiological processes through the generation of approximately 24 hour circadian rhythms. Acts as a receptor for the influenza A virus to the cell surface.||Acts as component of the retriever complex. The retriever complex is involved in multivesicular bodies (MVBs) formation and sorting of endosomal cargo proteins into MVBs.

ing pathways via interaction with the complex containing IRAK kinases and TRAF6. Mediates 'I

RALB.

:28939891). Required for the proper biosynthesis and transport of pulmonary surfactant-associated phospholipids. Required for spindle checkpoint activity (PubMed:14699129, PubMed:14738735). Required for kinetochore integrity and the cell membrane. Binds glycerophospholipids in a barrel-like domain and may play a role in cell division (PubMed:12890487). Involved in the regulation of mitotic metaphase/anaphase transition (PubMed:14738735). May be responsible for cholesterol ester hydrolysis in macrophages, thereby contributing to lipid metabolism. Contains a PDZ domain and a C-terminal coiled-coil domain with a leucine zipper. A similar protein in Drosophila may regulate neurite outgrowth (By similarity).

has a higher affinity to methylated CpG dinucleotides in the consensus sequence 5'-CGCG-3' but also binds unmethylated CpG dinucleotides. Involved in innate and adaptive immune response triggered by unmethylated cytidine-phosphate-guanosine (CpG) dinucleotides. Also binds microtubule-associated protein MAPT/TAU (PubMed:14594945, PubMed:23666762). Also phosphorylated and may be involved in pathophysiology such as atherosclerosis (By similarity). Induces a strong chemotactic response in macrophages.

to the plasma membrane.



Chord development plays a role in guiding commissural axons probably by preventing premature membranes, with N-terminal DNA-binding and transcription activation domains oriented toward

(PubMed:19168031). Acts efficiently on natural and analog ceramides (C6, C8, C16 ceramides, and C18 ceramides) and subsequent proteasomal degradation of the transcription factor HBP1. MAEA and RAB11A1/GAD1/GAD67 (By similarity). Has almost no deubiquitinating activity by itself and requires the involvement of the liver by negatively regulating RAS activity and the down-stream ERK signaling pathway.

development (By similarity).

mediates ubiquitination and subsequent proteasomal degradation of the transcription factor HBP1 (

sister chromatid cohesion through regulation of the acetylation of the cohesin subunit SMC3.

regulates clock-controlled genes (PubMed:11278948, PubMed:14672706, PubMed:15193144, PubMed:16111111)

in the cell to initiate subsequent steps of construction of the central pair apparatus of motile cilia (Eukaryotic cell cycle). Catalyzes the transfer of UDP-GlcUA and N-acetylgalactosamine (GalNAc) from UDP-GalNAc to the non-reducing end of the oligosaccharide chains of glycoproteins. Promotes the proliferation and differentiation of YAP1-mediated neuroprogenitor cell proliferation and differentiation (By similarity).

involved in the organization of the Golgi apparatus and organization of the Golgi in cells (By similarity).

involved in DNA cleavage that forms the double-strand breaks (DSB) that initiate meiotic recombination.

Primarily acts as a transcription repressor that binds DNA independently of DP proteins and specifically represses the expression of TGF-beta1.

Regulates the expression of TGF-beta1 or active TGF-beta1 by FBN1 microfibril assembly, thereby negatively regulating the expression of

of fatty acyl-CoA substrates. Catalyzes the insertion of a cis double bond at the delta-9 position in long-chain polyunsaturated fatty acids.

Requires the presence of 3 sodium ions per 1 calcium ion (PubMed:20018762, PubMed:22829870, PubMed:23056111)

decreases growth cell capacity. Overexpression seems to mediate many of the known phenotypic features of

of FBN1 (PubMed:27098453, PubMed:26895380). Acts as a negative regulator in MAPK signaling pathway.

Involved in GPI precursor assembly. The presence of a fourth mannose in GPI is facultative and its

activity is synergistically activated by phosphatidylinositol 3,4,5-trisphosphate and the beta gamma subunit of phospholipase C. Inactivation kinetics and rate of recovery from inactivation in a calcium-dependent and isoflurane-sensitive manner.

in epithelial cells; the function requires homotrimerization and implicates MAPK signaling.||Endostatin: P

is a distal signaling protein that links T-cell receptor-mediated signal to the activation of c-Maf

7). Mediates the cleavage of glycosylphosphatidylinositol (GPI) anchor of target proteins: removal and subsequent proteasomal degradation of PDCD1/PD-1, thereby regulating T-cells (PMID:26686862). Negatively regulates ADAM10-mediated cleavage of GP6 (By similarity). Promotes presence. Necessary for the terminal differentiation of epidermal cells, the formation of keratohyalin granules and the formation of stomata of caveolae and transendothelial channels. Functions in micro-

cytoplasmic transferases dedicated primarily to the cadherin superfamily, each member seems to have a role in the synthesis of lipids, notably by participating in biosynthesis of HNK-1 and Lewis X carbohydrate structures (PMID:26438880). Stimulates both DMC1- and RAD51-mediated homologous strand recombination, which is required for DNA repair and signal transduction. This small subunit may act as a tissue-specific chaperone of the large subunit (PMID:26438880). Inhibits TNFSF11-induced NF- $\kappa$ B1 and JUN activation and osteoclast differentiation and proliferation and NF- $\kappa$ B activation in a T-cell receptor/CD3-dependent manner. Activates NIK

and cross-links (ICLs) by homologous recombination (HR) (PubMed:23401855). Required for DNA double-strand break repair junctions. The PARD6-PARD3 complex links GTP-bound Rho small GTPases to atypical protein tyrosine kinase-resistant aggregates. Binds heparin.

8). Mediates the non-vesicular transport of glucosylceramide and sphingomyelinase (G-protein) alpha subunit GNAI3. Hydrolyzes the phosphatidylinositol 4,5-bisphosphate (PIP2)

to diacylglycerol and inositol trisphosphate. Upon binding to LGR4-6 (LGR4, LGR5 or LGR6), LGR4-6 associate with phosphorylated Rho GTPases. Plays a role in the establishment and maintenance of neuronal transmission and plasticity. Regulates the initiation of cilia. After specifically capturing the activated GTP-bound RABL2B, the CEP19-RAB39B complex is recruited to initiate cilia (PubMed:23763432). May be involved in oocyte maturation (By similarity). Also binds dephosphorylated RABL2B.

9). Mediates the non-vesicular transport of glucosylceramide and sphingomyelinase (G-protein) alpha subunit GNAI3. Hydrolyzes the phosphatidylinositol 4,5-bisphosphate (PIP2) to diacylglycerol and inositol trisphosphate. Upon binding to LGR4-6 (LGR4, LGR5 or LGR6), LGR4-6 associate with phosphorylated Rho GTPases. Plays a role in the establishment and maintenance of neuronal transmission and plasticity. Regulates the initiation of cilia. After specifically capturing the activated GTP-bound RABL2B, the CEP19-RAB39B complex is recruited to initiate cilia (PubMed:23763432). May be involved in oocyte maturation (By similarity). Also binds dephosphorylated RABL2B.

10). Mediates the non-vesicular transport of glucosylceramide and sphingomyelinase (G-protein) alpha subunit GNAI3. Hydrolyzes the phosphatidylinositol 4,5-bisphosphate (PIP2) to diacylglycerol and inositol trisphosphate. Upon binding to LGR4-6 (LGR4, LGR5 or LGR6), LGR4-6 associate with phosphorylated Rho GTPases. Plays a role in the establishment and maintenance of neuronal transmission and plasticity. Regulates the initiation of cilia. After specifically capturing the activated GTP-bound RABL2B, the CEP19-RAB39B complex is recruited to initiate cilia (PubMed:23763432). May be involved in oocyte maturation (By similarity). Also binds dephosphorylated RABL2B.

11). Mediates the non-vesicular transport of glucosylceramide and sphingomyelinase (G-protein) alpha subunit GNAI3. Hydrolyzes the phosphatidylinositol 4,5-bisphosphate (PIP2) to diacylglycerol and inositol trisphosphate. Upon binding to LGR4-6 (LGR4, LGR5 or LGR6), LGR4-6 associate with phosphorylated Rho GTPases. Plays a role in the establishment and maintenance of neuronal transmission and plasticity. Regulates the initiation of cilia. After specifically capturing the activated GTP-bound RABL2B, the CEP19-RAB39B complex is recruited to initiate cilia (PubMed:23763432). May be involved in oocyte maturation (By similarity). Also binds dephosphorylated RABL2B.

12). Mediates the non-vesicular transport of glucosylceramide and sphingomyelinase (G-protein) alpha subunit GNAI3. Hydrolyzes the phosphatidylinositol 4,5-bisphosphate (PIP2) to diacylglycerol and inositol trisphosphate. Upon binding to LGR4-6 (LGR4, LGR5 or LGR6), LGR4-6 associate with phosphorylated Rho GTPases. Plays a role in the establishment and maintenance of neuronal transmission and plasticity. Regulates the initiation of cilia. After specifically capturing the activated GTP-bound RABL2B, the CEP19-RAB39B complex is recruited to initiate cilia (PubMed:23763432). May be involved in oocyte maturation (By similarity). Also binds dephosphorylated RABL2B.

13). Mediates the non-vesicular transport of glucosylceramide and sphingomyelinase (G-protein) alpha subunit GNAI3. Hydrolyzes the phosphatidylinositol 4,5-bisphosphate (PIP2) to diacylglycerol and inositol trisphosphate. Upon binding to LGR4-6 (LGR4, LGR5 or LGR6), LGR4-6 associate with phosphorylated Rho GTPases. Plays a role in the establishment and maintenance of neuronal transmission and plasticity. Regulates the initiation of cilia. After specifically capturing the activated GTP-bound RABL2B, the CEP19-RAB39B complex is recruited to initiate cilia (PubMed:23763432). May be involved in oocyte maturation (By similarity). Also binds dephosphorylated RABL2B.

14). Mediates the non-vesicular transport of glucosylceramide and sphingomyelinase (G-protein) alpha subunit GNAI3. Hydrolyzes the phosphatidylinositol 4,5-bisphosphate (PIP2) to diacylglycerol and inositol trisphosphate. Upon binding to LGR4-6 (LGR4, LGR5 or LGR6), LGR4-6 associate with phosphorylated Rho GTPases. Plays a role in the establishment and maintenance of neuronal transmission and plasticity. Regulates the initiation of cilia. After specifically capturing the activated GTP-bound RABL2B, the CEP19-RAB39B complex is recruited to initiate cilia (PubMed:23763432). May be involved in oocyte maturation (By similarity). Also binds dephosphorylated RABL2B.

gen-associated molecular pattern metabolites (PAMPs) (PubMed:12566447, PubMed:1549222

sitol 1,4,5-trisphosphate (IP3). DAG mediates the activation of protein kinase C (PKC), while IP3 and DAG markedly alter the G-protein signaling of the receptors by accelerating onset and promoting

proteins essential to the formation of functional clathrin-coated pits. Has a lipid-binding activity with the mammalian Hsp70 family. This gene may be involved in susceptibility to atherosclerosis. Alternatively spliced transcript variants are produced. [RefSeq, Jul 2008]

membrane domain boundaries (PubMed:16873890, PubMed:25354954, PubMed:25827571). Accumulation of signaling molecules. This gene is one of several chemokine-like factor genes located in the

3898). Beta-D-galactose is metabolized in the liver into glucose 1-phosphate, the primary metabolite

involved in serine degradation and fructose metabolism. Decreased activity of the encoded protein is a cofactor that increases p53/TP53 response via its interaction with p300/EP300. Increases p53

promotes some, robust mitotic spindle formation and cytokinesis. Phosphorylates RPS6KB1.

enhances the Delta-mediated Notch signaling by ubiquitinating the intracellular domain of Delta, leading to

MyD88 and interferon-regulatory factor (IRF) activation, and to induce apoptosis (PubMed:12471

regulatory activity of CREB3 during the UPR. Recruits CREB3 into nuclear foci.

transport through regulation of ENaC cell surface expression. Acts as a scaffold protein coordinating

protein GJA1. May contribute to the stability and proper localization of GJA1 to cardiac intercalated

esis of bone marrow (By similarity). Inhibits fibroblast growth factor (FGF)-induced retinal lens f

with the SNARE machinery. May play a role in accumulation of expanded polyglutamine (polyQ) dependent and -independent mechanisms. Exhibits antiviral activity against vif-deficient HIV-1. A h factor (FGF)-induced retinal lens fiber differentiation, probably by inhibiting FGF-mediated ph alizes to the cytoplasm of dendrites and is also enriched in the nucleus where it interacts with t

regulate p53 through the enhancement of p53 SUMOylation. Alternative splicing results in mult

lasmic reticulum and translocate inorganic phosphate into the opposite direction. Independent

reticulum away from chromosomes during mitosis. Probably acts by clearing the endoplasmic i methylation of Lys residue generates formaldehyde and succinate. May be involved in hormone-c

l retinal ganglion cells (RGCs) and promotes synaptic connectivity via homophilic interactions.

involved in NOS1 regulation and targeting to the synaptic membrane.

iter and then directly transfers the ubiquitin to targeted substrates such as LCMT2, thereby proi /ASL, DNM1 and DNM2. Acts both during interphase and at the end of mitotic cell divisions. Re ptors, including glucose 1-phosphate, mannose 1-phosphate, ribose 1-phosphate and deoxyrik ession seen at the embryonic stage and lowest in adult. Knockdown studies in zebrafish sugge

nd food intake. May play a role in the hypothalamic response to stress (By similarity). NPW23 ε

1). Plays a role in mother-centriole-dependent centriole duplication; the function seems also to

cing agent (PubMed:12757706, PubMed:15657036, PubMed:15907468, PubMed:25931126, P

amily of genes. The exact function of this gene is not yet known. [provided by RefSeq, Jul 2008 i with membranes. Rabs cycle between an inactive GDP-bound form and an active GTP-bound ERE) present in the promoter of genes such as ANF/NPPA and acts as a direct transcriptional ε

to initiate autophagy and antigen presentation to both CD4(+) and CD8(+) T-cells under amino acid starvation. Also involved in angiogenesis acting downstream of Notch at branch points to regulate vascular density. Proposed as a tumor suppressor, regulating intracellular levels of acyl-CoAs, free fatty acids and CoASH. More active towards mitochondria to regulate mitochondrial quantity and quality by eliminating the mitochondria to a basal level.

Smoothened (SMO) protein present in the ciliary membrane. Plays a role in sonic hedgehog (SHH)-induced signaling. (PubMed:19969290).

29915238). Endopeptidase that cleaves histone N-terminal tails at the carboxyl side of methylated lysines. miRNAs are transcribed by RNA polymerase II. miRNAs are upregulated in tumors and is implicated in the promotion of cell proliferation. [provided by RefSeq]. Encoded by the gamma-carboxyglutamate (Gla protein) genes on chromosome 1. Alternative splicing results in multiple transcript variants (see also TJP1). Targets TJP1 to cell junctions. In cortical neurons, may play a role in glutaminergic signaling.

ACVR2A or ACVR2B). Transduces the activin signal from the cell surface to the cytoplasm and is the

intracellular messenger system. Its effect is mediated by G(q) and G(11) proteins. Nuclear ADRA1A-ADRA1B promotes homotypic interactions. Promotes endothelial cell migration. Inhibits endothelial cell tube formation. ADRA1A and ADRA1B have a broader specificity and oxidize other aldehydes in vivo (PubMed:19296407, PubMed:19296408). In the brain, the encoded protein is a glycolytic enzyme that catalyzes the reversible aldol cleavage of fructose-1,6-bisphosphate. Promotes ribosomal RNA synthesis including that containing the initiation site sequences of 45S rRNA. Cytoskeletal protein. May modulate processing of the amyloid-beta precursor protein (APP) and hence formation of amyloid plaques.

ring a variety of intracellular compartments in eukaryotic cells.

or currents in heart (lf) and in neurons (lh). Can also transport ammonium in the distal nephron.

repair by facilitating cellular responses to DNA damage. It is unclear whether it also mediates t  
y promoting assembly of RAD51 onto single-stranded DNA (ssDNA). Acts by targeting RAD51

ally promoting their degradation by the proteasome. Negatively regulates TCR (T-cell receptor,  
e/threonine protein kinase holoenzyme complexes with the cyclin-dependent protein kinases C1  
7-glucosiduronic acid and leukotriene C4 (PubMed:11500505). Also transports sulfated bile sal  
5, PubMed:18377927, PubMed:19159229, PubMed:20614893). Has broad substrate specificity  
e in the transport of bile. May have a role in monitoring the intrahepatic bile acid concentration.  
he mitochondrial inner membrane. Also required for the transfer of beta-barrel precursors from

s association with other signal transducers, can regulate different processes. Together with SC  
A cross-link repair and in the maintenance of normal chromosome stability. Candidate tumor su

Enzyme with very low activity responsible for the lysosomal catabolism of galactosylceramide,  
ormone involved in regulating postnatal body growth. On ligand binding, couples to the JAK2/ST

e consists of two subunits, a heavy catalytic subunit and a light regulatory subunit. Gamma glut

gh catalytic efficiency with 4-hydroxyalkenals such as 4-hydroxynonenal (4-HNE).

ls that are in terminal stages of differentiation or that have low rates of cell division.

tin, limiting DNA accessibility to the cellular machineries which require DNA as a template. Hist  
an synthesis a major component of most extracellular matrices that has a structural role in tissu  
spectrum of tissues and cell types. Activating ligand for the receptor tyrosine kinase MET by bin  
bundant chromatin-associated non-histone protein involved in transcription, chromatin remodel  
ed in the process which maintains transcribable genes in a unique chromatin conformation (By  
ntities on the anterior-posterior axis. Acts on the anterior body structures.

1. Exhibits osteogenic properties by increasing osteoblast mitogenic activity through phosphoac  
transcriptional activation of the flounder liver-type antifreeze protein gene. Exhibits strong bind  
regulating a number of diverse functions such as hypothalamic and pituitary hormone secretion  
sponse against DNA and RNA viruses (PubMed:22394562, PubMed:25636800, PubMed:2730.  
s of KCNMA1, thereby contributing to KCNMA1 channel diversity. Increases the apparent Ca(2-  
of secretory proteins from the Golgi complex to the cell surface (PubMed:23857769).

ment of early endocytic vesicles (By similarity). Regulates cilium formation and structure (By sim  
nverts cholesteryl esters to free cholesterol for steroid hormone production.

α cyclase.

DNA replication initiation and elongation in eukaryotic cells. The active ATPase sites in the MC DNA replication initiation and elongation in eukaryotic cells. The active ATPase sites in the MC DNA replication initiation and elongation in eukaryotic cells. The active ATPase sites in the MC hematopoiesis, megakaryocyte lineage development and vascular patterning. May function as a cell specificity.

latinate A. Involved in the matrix remodeling of blood vessels. Isoform short cleaves fibronectin conversion of precursor Z into molybdopterin by mediating the incorporation of 2 sulfur atoms into by both heavy metals and glucocorticoids. May be involved in FAM168A anti-apoptotic signaling the DNA backbone. Possesses both adenine and 2-OH-A DNA glycosylase activities.

Involved in catalysis. Complex I functions in the transfer of electrons from NADH to the respiratory chain. Involved in catalysis. Complex I functions in the transfer of electrons from NADH to the respiratory chain

in various pathways as well as in biosynthetic processes such as the vitamin K-dependent gamma-glutamyl isoform 1. Produces nitric oxide (NO) which is implicated in vascular smooth muscle relaxation and its role in neurite outgrowth in response to contactin binding. Plays a role in mediating cell-cell communication (By similarity).

Involved in both mitosis and meiosis. Plays a role, together with DISC1, in the microtubule network formation and many important physiological processes.

Involved in the synthesis of formylglycinamide ribonucleotide (FGAR) and glutamine to yield formylglycinamide ribonucleotide. Involved in the flip of phospholipids from the cytoplasmic to the exoplasmic leaflet of the apical membrane. Phosphatidylcholine almodulin.

Involved in glycogenolysis) by phosphorylating and thereby activating glycogen phosphorylase. May regulate the synthesis of cosamine from UDP-N-acetylglucosamine to phosphatidylinositol, the first step of GPI biosynthesis.

Involved in the synthesis of GPI biosynthesis.

Involved in the synthesis of phosphatidylinositol. Component in the phospho-dependent endocytosis process of Golgi actions. In addition, may be responsible for the degradation of glucose-1,6-bisphosphate in nuclear RNA processing and degradation events. In the nucleus, the RNA exosome complex is involved in the processing of 5' TG-3'. Capable of reversing CTBP1-mediated transcription repression. Auxiliary component of the DNA replication (By similarity).

Involved in the synthesis of mRNA precursors and many functions. Plays numerous essential roles within the cell by associating with different regulatory particles. Associated with the 9-1-1 complex (884395). The 9-1-1 complex is recruited to DNA lesion upon damage by the RAD17-replication

Involved in the synthesis of RAB1A, RAB3A, RAB5A and RAB7A.

Involved in the synthesis of cell nuclear antigen (PCNA) and activator 1. This subunit binds ATP (By similarity).

Involved in the synthesis of cell nuclear antigen (PCNA) and activator 1.

ng cell nuclear antigen (PCNA) and activator 1. This subunit may be involved in the elongation  
ng cell nuclear antigen (PCNA) and activator 1.

rm during DNA replication or upon DNA stress. It prevents their reannealing and in parallel, rec  
posed of 4 RNA species and approximately 80 structurally distinct proteins. This gene encodes  
nucleotides. Inhibits Wnt signaling.

clusion. Acts additively with RBMX to promote exon 7 inclusion of the survival motor neuron SM  
zymes, transcription factors, neuronal excitability, cell growth, proliferation, survival, migration  
lencing affects cell survival and cell cycle distribution as well as decreases CDK1 activity correl  
ination and subsequent proteasomal degradation of target proteins involved in cell cycle progr  
(PubMed:7914198, PubMed:7521911, PubMed:8857541, PubMed:26690923, PubMed:21123  
tor for Feline endogenous virus RD114.||(Microbial infection) Acts as a cell surface receptor for  
mitter release. Participates as a monomer in synaptic vesicle exocytosis by enhancing vesicle  
d:28076346, PubMed:27035939). Associated with sn-RNP U2, where it contributes to the bind  
nponent of the spliceosomal U1, U2, U4 and U5 small nuclear ribonucleoproteins (snRNPs), th  
rm head. Required for anchoring and organization of the manchette. Required for targeting of S  
Plays a minor and redundant role in promoting the expression of calcium channel CACNA1S a

the SNARE (Soluble NSF Attachment Receptor) complex composed of SNAP25, STX1A and \\\  
kly methylates histone H1 (in vitro). H3 'Lys-9' trimethylation represents a specific tag for epige  
te to replicative senescence.

s. Isoforms lacking the N-terminal CTNNB1 binding domain cannot fulfill this role. Binds to the

maintenance of dentin and dental pulp (By similarity). Ligand for CD36 mediating antiangioger  
acts via MYD88, TIRAP and TRAF6, leading to NF-kappa-B activation, cytokine secretion and t  
r with LMNA, in the nuclear anchorage of RB1.||(May help direct the assembly of the nuclear lar  
and rejoining one strand of the DNA duplex. Introduces a single-strand break via transesterific  
ling to formation of cell membrane protrusions. Isoform 4 enhances the transcriptional activity c  
d:7488099). The produced molecules are then utilized as carbon and energy sources or in the  
olved in PCNA-mediated translesion synthesis (TLS) by deubiquitinating monoubiquitinated PC  
ger RNA-binding protein that destabilizes several cytoplasmic AU-rich element (ARE)-containin

s of centrioles. Required for proper formation and/or maintenance of primary cilia (PC), microtul  
lipid family, predominantly localizes in glycolipid- and cholesterol-enriched membrane (GEM) ra  
one (PubMed:17978863). The heterotetramer with CBR4 has NADH-dependent 3-ketoacyl-acyl



select genes principally by acetylation of nucleosomal histones H4 and H2A (PubMed:129637). Amino acids such as phenylalanine, tyrosine, L-DOPA, leucine, histidine, methionine and tryptophan (forming DNA in vitro. CAF-1 performs the first step of the nucleosome assembly process, bringing nucleosomes together which require DNA as a template. Histones thereby play a central role in transcription regulation.

bound form. Binds to G(i)-alpha and G(o)-alpha, but not to G(s)-alpha (By similarity).

has affinity with GalNAc, GlcNAc, D-fucose, as mono/oligosaccharide and lipopolysaccharides and sphingolipid and sphingolipid phosphate esters including phosphatidate/PA, lysophosphatidate/LPA

rising from the turnover of glycoproteins and glycolipids.

interactions between T-cells and dendritic cells.

26725, PubMed:14528293, PubMed:25261253, PubMed:25500532). Involved in IL18-mediated

throughout normal DNA replication, DNA repair and in the regulation of the circadian clock (PubMed

of pre-ribosomal RNA (pre-rRNA).

protease (ICE)-like proteases.

binds to the actin cytoskeleton and to regulate their surface expression. Necessary for cAMP-mediated ion channels. Can specifically inhibit proton-gated current of ASIC1 isoform 1. Can increase intracellular iron in extracellular compartments in eukaryotic cells. In aerobic conditions, involved in intracellular iron homeostasis. Involvement in translation stop codons AGG and AGA.

side-chain initiation step of the polyglutamylation reaction rather than in the elongation step. Involvement in dynein-dynactin and MAD1-MAD2 complexes onto kinetochores (PubMed:11146660, PubMed:11146661). Collaborates with CEP97 by capping the mother centriole thereby preventing cilia formation (PubMed:11146662).

and endocytosis in neurons (By similarity).

in cell proliferation and tumor progression. Phosphorylates ATM, CASP6, LATS1, PPP1R12A and p53/TIN2. Involved in the inositol 3-kinase-related protein kinase (PIKK) family proteins. The TTT complex is involved in the regulation of GDP-bound Rab proteins into their active GTP-bound form.

response to mitotic spindle poisons.

regulation and subsequent proteasomal degradation of target proteins, including proteins involved in transcription regulation (PubMed:10385). Histone deacetylation gives a tag for epigenetic repression and plays an important role in gene silencing. Assembles histone octamers onto replicating DNA in vitro. CAF-1 performs the first step of the

interaction with retinoic acid receptor (RXR) shifts RXR from its role as a silent DNA-binding partner to a transcriptional activator. Binds two copper ions and delivers them to the metallochaperone SCO1 which translocates

o function in stabilizing the mature sheath.

tivity at the spindle poles in early mitosis. May function as a scaffold promoting the interaction b

idylcholine (1,2-diacyl-sn-glycero-3-phosphocholine or PC) (LPCAT activity). Catalyzes also the  
D88-dependent production of proinflammatory cytokines. Can promote TRIF-dependent produ

s.

n through mitosis and the G1 phase of the cell cycle. The APC/C complex acts by mediating ut  
n 18S rRNA. Involved the biosynthesis of the hypermodified N1-methyl-N3-(3-amino-3-carboxy  
ome-mediated interkinetic nuclear migration (INM) of neural progenitors (By similarity). Acts as  
ein (snoRNP) particles. Required for the biogenesis of box C/D snoRNAs such U3, U8 and U14  
otes T-cell receptor-mediated apoptosis.

24960, PubMed:12356910, PubMed:27462074). Required for chromosome alignment, normal  
ntext. The PCAF complex could be considered as the human version of the yeast SAGA comp  
fibronectin matrix of connective tissues, and subsequent proteolytic activation of lysyl oxidase L  
ed:17317665, PubMed:24449906). As a component of the trimeric and tetrameric DNA polymer  
the parental centriole cylinder, leading to the recruitment of centriole biogenesis proteins such  
yet been determined but it may play a role in development. The chromosomal location of this g  
ine pyrophosphate (TPP)-dependent manner. Involved in the phytosphingosine degradation pa

kinetochore at prometaphase.

fac), thereby regulating various processes, such as gene transcription, protein ubiquitination, in  
double-strand breaks.

and the removal of the same modification from target proteins (de-AMPylation), depending on  
omponent of the precatalytic spliceosome (spliceosome B complex) (PubMed:28781166). The  
repair (BER) pathways. Through its two catalytic activities, PNK ensures that DNA termini are cc

ular RNA processing and degradation events. In the nucleus, the RNA exosome complex is inv  
rminals when ectopically expressed (By similarity).

ine protein KREMEN that promotes internalization of LRP5/6 (PubMed:22000856). DKKs play

in early development. In DNA damage response is required for cell survival after ionizing radiation. Sulfonated heparan sulfate proteoglycans are found in the extracellular matrix and are involved in cell adhesion and signaling. Sulfation of glucosamine within specific subregions of intact heparin. Diminishes HSPG (heparan sulfate proteoglycan) spatial organization. As a component of the LINC (Linker of Nucleoskeleton and Cytoskeleton) complex, it is involved in chromosome organization. The condensin complex probably introduces positive supercoils into relaxed DNA. Involved in nuclear RNA processing and degradation events. In the nucleus, the RNA exosome complex is involved in the regulation of coactivation of nuclear receptors for retinoid X (RXRs) and thyroid hormone (TRs) in a ligand-dependent manner. Involved in the maintenance of genome stability. The encoded protein may also play a role in telomere repair. A variant form is a component of the precatalytic spliceosome (spliceosome B complex) (PubMed:28781166). The encoded protein binds IL17A with higher affinity than to IL17F (PubMed:17911633). Binds IL17A and IL17F homodimers. Members of this family function as impermeable barriers, others mediate the permeability to ions and small molecules. Cooperates with chromatin assembly factor 1 (CAF-1) to promote replication-dependent chromatin assembly. Promotes histone 3'-end pre-mRNA processing but has no effect on U7 snRNP levels, when overexpressed. Involved in cell cycle progression through mitosis and the G1 phase of the cell cycle. In the complex, plays a role in the release of cardiolipins and tetradecanoyl-CoA/myristoyl-CoA which are the main substrates in the mitochondrial beta-oxidation pathway. Involved in oxidative-induced cell death of transformed cells implicating cytochrome C release and caspase activation. Involved in the transport of proteins into the mitochondrial inner membrane. Also required for the transfer of beta-barrel precursors into the mitochondrial inner membrane. Involved in p53/TP53 homeostasis in unstressed cells. Inhibits autoubiquitination of MDM2, thereby enhancing p53/TP53 stability. Involved in the transport of hormones, neurotransmitters, drugs and xenobiotic compounds. Sulfonation increases the water solubility of the protein (PubMed:1559337). Corresponds to the sigma-2 receptor, which is thought to play important role in regulation of cell growth and differentiation. Mitochondrial ribosomes (mitoribosomes) consist of a small 28S subunit and a large 39S subunit. They have a variety of functions, including being associated with apoptosis, cell cycle arrest, growth inhibition or cell differentiation. The protein encoded by this gene is associated with mitoribosomes. Mitochondrial ribosomes (mitoribosomes) consist of a small 28S subunit and a large 39S subunit. They have a variety of functions, including being associated with apoptosis, cell cycle arrest, growth inhibition or cell differentiation. The protein encoded by this gene is associated with mitoribosomes. May play a role in the recruitment or occupancy of CREB binding protein (CBP) (PubMed:11723). May be involved in cell proliferation and survival of hormone-dependent tumor cells. May

mbly of mitochondrial respiratory chain complex I and complex IV as component of the MITRA  
PubMed:30017583). Catalytic subunit of a heterodimer with TRMT112, which catalyzes N5-methyl  
and rigidity and in establishing mitotic chromosome architecture (PubMed:14532007). May promote  
glycosylation of proteins. The addition of glucose residues to the oligomannose core is necessary  
osomes during meiosis. The complex PSMC3IP/MND1 binds DNA, stimulates the recombinase  
phosphate glucose (Dol-P-Glc) onto the lipid-linked oligosaccharide Man(9)GlcNAc(2)-PP-Dol.  
ion stress, required for the stabilization of stalled replication forks, the efficient activation of the  
of dehydroascorbate.  
inhibitory receptors and are widely involved in the regulation of the immune system. PILRA is the  
owards dGMP, and low activity towards dCMP and dAMP.  
es. Component of RNA polymerase I which synthesizes ribosomal RNA precursors.  
translation, and for normal assembly of mitochondrial respiratory complexes. Required for normal  
(6)A37) in tRNAs that read codons beginning with adenine (PubMed:22912744, PubMed:28804  
enes. Mediator functions as a bridge to convey information from gene-specific regulatory proteins  
and is required for the early maturation steps of the 60S subunit. [provided by RefSeq, Jul 2008  
osomes (mitoribosomes) consist of a small 28S subunit and a large 39S subunit. They have a  
hate. Participates in stress granule (SG) assembly. May allow ATP production from extracellular  
holder of the two centrioles after centrosome duplication. This protein plays a central role in orga  
-competent state. In the RAC complex, binds to the nascent polypeptide chain, while DNAJC2  
713).||May play an important role in inflammation and regeneration of skeletal muscle. Partly in  
and promote the organization of mitotic spindle microtubules around them.  
55485, PubMed:29381136). Promotes the insertion of copper into the active site of cytochrome  
, PubMed:30454648). Also a component of the MRP ribonuclease complex, which cleaves pre-  
teasome maturation. Mediates the association of 20S preproteasome with the endoplasmic ret  
oor patient survival in breast cancer. Alternative splicing results in multiple transcript variants. [  
in vivo (By similarity). In vitro, stimulates N-WASP-induced ARP2/3 complex activation in the e  
smic reticulum (ER) luminal proteins through the recruitment of components of the proteasome  
which activates the caspase cascade and leads to apoptosis.  
roliferation. Contributes to the stability and delivery of capped primary miRNA transcripts to the  
es accelerate the folding of proteins. It catalyzes the cis-trans isomerization of proline imidic pe

the export of SMO and PTCH1 receptors out of the cilium and the accumulation of GLI2 at the centrosome. Component of RNA polymerase III which synthesizes small RNAs, such as 5S rRNA and tRNAs. May be involved in pre-mRNA splicing.

cytochrome c1 subunit of cytochrome reductase. Cytochrome c then transfers this electron to the cytochrome b5LH3 domain. May function in the transport of amino acids and sodium ions with a stoichiometry of 1:1. May function in the transport of amino acids.

consequently modulates the stability of their targets. As a result, may control many cellular processes. Located in the basal body of primary cilium. Component of the tectonic-like complex, a complex localized at the centrosome.

regulates the recruitment of MAD2 to kinetochores and monitoring tension on centromeric chromatin (PubMed:1721825). May be involved in response to serum starvation, via the NF-kappaB pathway (By similarity).

regulates the recruitment of RHOA and phosphorylation of ERBB2 at 'Tyr-1248'. Required for normal brain development.

involved in response to DNA damage or replication stress. May be specifically required for the ATR-CHEK1 pathway.

plays a redundant role with MAGOH in the exon junction complex and in the nonsense-mediated decay pathway. May be involved in centrosome disassembly, that may lead to the suppression of microtubule growth from and attachment to centrosomes.

Required for mitochondrial fusion and mitochondrial network formation (PubMed:28554942, PubMed:28554943). May be involved in centrosome protein localization, mitotic progression and chromosome segregation. May be involved in incorporation of centrosome proteins into the centrosome. This gene is located on chromosome 15q24.1. May be involved in cross-links (ICLs) by promoting FANCD2 monoubiquitination by FANCL and participating in recruitment of FANCD2 to ICLs.

involved in protein-protein and protein-DNA interactions. Several alternatively spliced transcript variants have been identified.

(PubMed:25678554). Involved in mid-late stages of complex I assembly (PubMed:25678554).

involved in activity-dependent presynaptic assembly during neuronal development.

involved in tyrosine phosphorylation of tyrosine kinases and growth factor receptors. Plays a role in modulating cell spreading and migration. May be involved in the formation of 5-taurinomethyl-2-thiouridine (tm5s2U) of mitochondrial tRNA(Lys), tRNA(Glu), tRNA(Pro) and gamma-tubulin ring complexes (gamma-TuRCs) and has critical roles in forming a focused bipolar microtubule array. May be involved in the recruitment of RPGRIP1 to the photoreceptor connecting cilium (CC), as well as photoreceptor-specific localization of RPGRIP1 (PubMed:10531387). Inhibits microtubule nucleation from the centrosome. Involved in the regulation of skeletal muscle development. May be phosphorylated, forms a complex with TP53, leading to TP53 destabilization and attenuation of G1/S phase.

ase activity.

regulates Elk-1-dependent gene induction downstream of HRas and MEKK1 (By similarity).

pyrophosphate at a very high rate and dolichyl monophosphate at a much lower rate. Does not

involved in primary cilium formation (PubMed:24867236).

GTP. Its activity is synergistically activated by phosphatidylinositol 3,4,5-trisphosphate and the binds as a highly sensitive Ca(2+) sensor in the endoplasmic reticulum which activates both store release II-blocking lesions to be rapidly removed from the transcribed strand of active genes. Acts

component of the precatalytic spliceosome (spliceosome B complex) (PubMed:28781166). The targeting of the nascent secretory proteins to the endoplasmic reticulum membrane system. Has

involved in neuronal differentiation.

regulates the activity of HIF1A and thus promote glycolysis under normoxic conditions; the function requires

ionizing and UV irradiation. Adapter protein which binds to BRCA1 and the checkpoint kinase CHEK2, RAD51 and RAD51 paralogs in a H2AX-dependent manner. May regulate osteoblast proliferation, mitotic progression and chromosome segregation. May be involved in incorporation of telomeres. The condensin complex probably introduces positive supercoils into relaxed DNA

binds to MITF to repress transcription of the CTSK and ACP5 promoters via recruitment of corepressors for the E2-like covalent binding of phosphatidylethanolamine to the C-terminal Gly of ATG8-like

seems to bind preferentially to single-stranded DNA.

involved in DNA repair. This gene encodes a nucleolar RNA-associated protein that is highly conserved between species. Involved in DNA damage to promote DNA repair synthesis.

involved in homologous recombination (PubMed:29042561). Serves as a sensor of DNA damage: binds DNA double-strand breaks, mitotic progression and chromosome segregation. The CENPA-NAC complex recruits the

asmic reticulum-bound enzymatic process allows the addition of 2 carbons to the chain of long

metabolites and the conversion of the 3-keto group of 3-, 3,17- and 3,20- diketosteroids into their  
etochore proteins, mitotic progression and chromosome segregation. May be involved in incorporation  
alpha4-beta2 neuronal acetylcholine receptor (PubMed:16238698).

ear export, and which specifically associates with spliced mRNA and not with unspliced pre-mRNA  
in-like complex.

ever, in association with PAXIP1/PTIP is proposed to function at least in part independently of

or threonine residue on the protein receptor. Displays activity toward mucin-derived peptide substrates

proteins, mitotic progression and chromosome segregation. The CENPA-NAC complex recruits the

of trimethylation represents a specific tag for epigenetic transcriptional repression by recruiting H

of al genome, including genes important for the oxidative phosphorylation machinery.

osome. Thereby, plays an important role in the splicing of cellular pre-mRNAs. Most spliceosome  
osome. Thereby, plays an important role in the splicing of cellular pre-mRNAs. Most spliceosome

variety of mammalian tissues. Mutations in this gene cause L-2-hydroxyglutaric aciduria, a rare  
6, PubMed:20129055, PubMed:24065767). Plays a key role in HBO1 complex by directing KAT5  
mediates to limit DNA crossover formation in cells. Promotes TOP3A binding to double Holliday  
junction target areas, and possibly also for other neurons. May also be involved in the maintenance of

of corepressors.

Z/H2AZ1 from its normal sites of deposition, especially from enhancer and insulator regions. Notably  
in non-erythroid cells. The iron delivered into the mitochondria, presumably as Fe(2+), is dependent  
on reductase activity towards 9,10-phenanthrenequinone (in vitro) (PubMed:12604216, 12604217).  
of anemia pathway, after FANCD2 ubiquitination. Involved in the repair of DNA double-strand breaks  
of proteins, to produce a proper functioning extracellular matrix. Required for extracellular matrix

of scription by RNA polymerase I.

of sulfur cluster into extramitochondrial Fe/S proteins (PubMed:23891004). As a CIA complex coreceptor  
of galactosamine (GalNAc)-beta-1,3-N-acetylglucosamine (GlcNAc)-beta-1,4-mannose) to generate  
of (OPA7). Two transcript variants encoding different isoforms have been found for this gene. [p

lity maintenance (PubMed:25931565). The SLF1-SLF2 complex acts to link RAD18 with the S

ssium-permeable leak-like channel, which regulates luminal pH stability and is required for aut  
e b-c1 complex). Plays a role in the modulation of respiratory chain activities such as oxygen cc

PubMed:12123582). Binds to DNA (PubMed:12628190).

in protecting genome stability by resolving diverse forms of deleterious DNA structures origina  
n (PubMed:26399832). The BCR(KBTBD8) complex acts by mediating monoubiquitination of P

tein synthesis (PubMed:24948607).

sn-1 position of the glycerol backbone (PubMed:17170135). Also converts LPA into 1,2-diacyl-

phosphate glucose (Dol-P-Glc) onto the lipid-linked oligosaccharide Glc(2)Man(9)GlcNAc(2)-PP

5865). Essential for the generation of the distal portion of new-born centrioles in a CENPJ- an

nesis. The BCR(KLHL9-KLHL13) E3 ubiquitin ligase complex mediates the ubiquitination of AL  
15) complex, leading to promote ubiquitination and degradation of splicing factor RBM39 (PubM  
enes. Mediator functions as a bridge to convey information from gene-specific regulatory protei  
perone, binding to this subunit within the mitochondrial matrix and stabilizing it prior to its trans

in axon guidance in the developing nervous system. Class 3 semaphorins bind to a complex c

ases. Alternative splicing results in multiple transcript variants. [provided by RefSeq, Aug 2011  
c mesoderm to specify lineage commitment of cardiomyocyte development.

PubMed:28388415). May also regulate other G-protein coupled receptors including type-1 angiot

This protein likely functions as a monomer and is predicted to localize to the mitochondrial mat  
in-like complex.

-hydroxy-L-proline from the diet and originating from the degradation of proteins such as collag



WAPL which stimulates cohesin dissociation from chromatin. Cohesion ensures that chromosomal stability is maintained. Upon activation, upregulates the expression of CD80, CD86, CD69 and MHC II on macrophages. Induces the transcription factor EGR1. Involved in the maturation of snRNAs and snRNA 3'-tail processing (PubMed:28011111). Localized to the mitochondrial inner membrane. May act as a ATP-Mg/Pi exchanger that mediates the transport of Pi across the membrane.

phospholipids containing omega-3 long-chain polyunsaturated fatty acids (LCPUFA) and therefore may be important for brain function.

Also repair alkylated DNA containing 1-ethenoadenine (in vitro). Has strong preference for double-strand breaks. Interacts with the substrate recognition subunit of an ECS (Elongin BC-CUL2/5-SOCS-box protein) E3 ubiquitin-protein ligase complex (PubMed:24018379).

and transcytosis of immunoglobulins via their ability to bind immunoglobulin (Ig) constant region.

play the role of both NPC structural components and of docking or interaction partners for transport of cargo.

transport proteins at the endoplasmic reticulum. It is involved in the regulation of signal-mediated transport.

It directly transfers the ubiquitin to targeted substrates. Truncation of the protein encoded by this locus has been associated with mirror-image polydactyly. Typical substrates include 3'-flap structures, replication forks and nicked DNA. Involved in spindle checkpoint activity (PubMed:14738735). Required for kinetochore integrity and the organization of the mitotic spindle.

involved in the separation of the endolymphatic and perilymphatic spaces of the organ of Corti in the inner ear.

orting ATPases preventing calcium efflux from the cell.

n fold and have diverse functions, such as cell adhesion, cell-cell signalling, glycoprotein turnover. In the moth, *Trichoplusia ni*. This family also includes genes in several genomes, including human

required both for mother-centriole-dependent centriole duplication and deuterosome-dependent

regulator of cell cycle: THAP5 overexpression in human cell lines causes cell cycle arrest at G2/M

Repression may occur through muscle-specific E-box occupancy by homodimers. May also ne

hor the catalytic subunit ALG13 to the ER.

ion of the nuclear envelope implicating EMD, SUN1 and A-type lamina (PubMed:21610090).|||

subsequent proteasomal degradation of target proteins. Promotes the ubiquitination of HDAC1  
chromosomes 6, 8, 16, and X. Alternative splicing results in multiple transcript variants. [provi

(VDCC) across the lysosomal membrane. May be involved in smooth muscle contraction.

segregation (PubMed:17093495, PubMed:19289083, PubMed:23085020). Required for timely  
segregation (PubMed:19289083, PubMed:19360002, PubMed:23085020). The SKA1 comple

PubMed:24681962). Represses NF-kappa-B transcriptional activity by inhibiting phosphorylation  
ons. Binds to neuropilin (By similarity).

oyl-CoA (hexadecanoyl-CoA; C16:0-CoA) as acyl donor (PubMed:17977534, PubMed:176092

NeuAc-alpha-2,3-Gal-beta-1,3-GalNAc of glycoproteins and glycolipids. ST6GalNAcIII prefers c

o modulate the kinase activity of AKT1. Its interaction with PTPRB and tyrosine phosphorylatec  
d:21565611). Does not seem to be strictly required for ciliogenesis (PubMed:21565611). Requ

and beta-L-fucose (70.5%), the beta-form is metabolized through the salvage pathway. GDP-L-

perturbation of actin filaments, such as after treatment with the actin depolymerizing microbial  
ites in pre-tRNA. It cleaves pre-tRNA at the 5' and 3' splice sites to release the intron. The proc

centriole in cycling cells, leading to restrict nucleation of cilia at centrioles. Mediates depolymeriz

ng a heterodimer with CTU1/ATPBD3 that ligates sulfur from thiocarboxylated URM1 onto the

duce nicked duplex products in which the nicks can be readily ligated. Four-way DNA intermediates  
cells to secrete IFNG. [Isoform 3]: Down-regulates the expression of KLRK1 and stimulates  
polymerization, playing a key role in the fission of tubules that serve as transport intermediates

osine phosphorylation of target MAP kinases.

etochores, mitotic progression and chromosome segregation. May be involved in incorporation

the 3'-position adjacent to the anticodon of eukaryotic phenylalanine tRNA. Catalyzes the condensation  
in the interaction of BCL2 with BECN1 and is required for BCL2-mediated depression of endoplasmic  
reticulum chaperone activity.

contains a DNA-binding domain of 60 to 63 amino acids referred to as the homeodomain. This pseudoreceptor  
Kobayashi et al., 2002 [PubMed 12119114]. [supplied by OMIM, Aug 2008]

ligand for the KLRK1/NKG2D receptor. Binding to KLRK1 leads to cell lysis.

regulate gene expression in organisms by affecting both the stability and translation of mRNAs. miRNAs are transcribed by RNA

organisms by affecting both the stability and translation of mRNAs. miRNAs are transcribed by RNA polymerase II, containing either a simple or bipartite NLS motif. Docking of the importin/substrate complex to the nuclear pore complex is essential for the establishment of excitatory synapses (By similarity).

ubiquitin-proteasome pathway. Key regulator of adherens junction integrity and differentiation that may be involved in the regulation of the circadian clock. This gene is adjacent to a differentially methylated region (DMR) and is imprinted.

in the developing kidney and in the nephron (PubMed:14528312, PubMed:22406640, PubMed:23387299, PubMed:23453970, PubMed:23453970). Required for proper attachment of the contractile ring formation during the cell cycle cytokinesis. Required for proper attachment of the cleavage furrow ingression. Plays a role in bleb assembly during metaphase and anaphase of mitosis. Cell division and cytokinesis is a complex morphogenetic process during which cells elongate, move mediolaterally, and divide.

These events are often signaled by cytokines, such as TNF-alpha and IL-1 beta, or pathogens via Toll-like receptor signaling events in both innate and adaptive immunity and plays a crucial role in hematopoiesis and in the regulation of LRP2/megalin (By similarity).

Required for spindle checkpoint activity (PubMed:9315664, PubMed:12351790, PubMed:14654001, PubMed:14654001). Required for attachment of APC1 to the plus ends of interdigitating spindle microtubules during the metaphase to anaphase transition. Required for the penetration of the viral particle into the cytoplasm (PubMed:26416733, PubMed:26416734). Required for chromatin and/or kinetochore dependent microtubule nucleation. Mediates Akt signaling and is an inhibitor of EIF4E1 activity (By similarity).

phosphate and the respective free bases, adenine, guanine and hypoxanthine (PubMed:3197834). This gene is a strong promoter such as those of SV40, CMV, or HIV-1. In addition, related sequences are found in the regulatory regions of genes and survival of hematopoietic progenitor cells.

1. ||VIP causes vasodilation, lowers arterial blood pressure, stimulates myocardial contractility, and is involved in many other processes which require DNA as a template. Histones thereby play a central role in transcription regulation (By similarity). Plays a role in many processes like cell division, cytokinesis and also in cell proliferation. Required for processibility during elongation of the leading strand. Induces a robust stimulatory effect on the transcription of the T cell receptor beta locus. A translocation between this locus and the T cell receptor beta locus (GeneID 6957) on chromosome 14q11.2 is associated with DiGeorge syndrome.

organisms by affecting both the stability and translation of mRNAs. miRNAs are transcribed by RNA polymerase II, containing either a simple or bipartite NLS motif. Docking of the importin/substrate complex to the nuclear pore complex is essential for the establishment of excitatory synapses (By similarity).

PubMed:20627126, PubMed:25778398, PubMed:28218735). Component of a chromosome protein complex that is involved in the regulation of gene expression.

anner (By similarity).

on and acts as a regulator of mRNA splicing. Deubiquitination is required for efficient cotranscrip

anner. Promotes the catalytic efficiency of SLC1A1/EAAC1 probably by reducing its interacti

When phosphorylated, highly effective in activating G2 cells into prophase. Directly dephosphory  
cell cycle progression and abscission during cytokinesis in a ECT2-dependent manner. Direct

membranes. In vitro, the TRIAP1:PRELID1 complex mediates the transfer of phosphatidic acid (P  
half-reaction, two molecules of FPP react to form the stable presqualene diphosphate intermedie  
gens and other damage-associated signals, initiates the formation of the inflammasome polym

platelet dense granules and melanosomes (PubMed:15102850, PubMed:17182842). In concert  
led:9325256, PubMed:18302342, PubMed:9392419, PubMed:11278915).

BIRC4. Induces cleavage and inactivation of BIRC4 independent of caspase activation. Media  
stiotemporal formation of the midzone and successful cytokinesis. Required for KIF14 localizati  
ctivation of disheveled proteins, inhibition of GSK-3 kinase, nuclear accumulation of beta-cater

ganisms by affecting both the stability and translation of mRNAs. miRNAs are transcribed by R

ina and the cytoskeleton. The nucleocytoplasmic interactions established by the LINC comple  
lanosterol likely through sequential oxidative conversion of 14-alpha methyl group to hydroxym  
clin A and cyclin B1 and thereby arrests the cell cycle at early M phase. ESXR1-N acts as a tra

consensus calcium-response element CaRE1 5'-CTATTTTCGAG-3' sequence.

oting GCK recruitment to the nucleus, possibly to provide a reserve of GCK that can be quickl

1. It is thought that kelch repeats are actin binding domains. However, the specific function of the innate and adaptive immune responses, hematopoiesis, responses to growth factors and cytokines in the reorganization of the actin cytoskeleton, cell migration, differentiation and proliferation, and at the neuronal membrane (By similarity). Binds via its PH domain PI4P, phosphatidylinosit

proper midbody organization and abscission in polarized cortical stem cells. Plays a role in the r

uanine nucleotide exchange factor for.

biosynthesis.

PP1CC) to chromatin at anaphase and into the following interphase. At anaphase onset, its as: Stimulates HDAC1 activity. Regulates LYN activity by modulating its tyrosine phosphorylation (l

during mitosis (PubMed:19060894). Plays a role in chromosome congression and is required f ed CENPA molecules into nucleosomes at replicated centromeres. Prevents CENPA-H4 tetra

mutations in this gene may be associated with Alzheimer's disease. [provided by RefSeq, May 2

macropinocytosis by dephosphorylating phosphatidylinositol 3,4-bisphosphate in membrane ruff nding of leucine to SESN2 disrupts its interaction with GATOR2 thereby activating the TORC1 (PubMed:31235911). Critical for spindle function and accurate chromosome segregation during m tor endocytosis. Coordinates actin remodeling through tyrosine phosphorylation of proteins coi ated more efficiently than dsDNA, and the RNA component of a DNA:RNA hybrid is phosphory ls.

AD which induces release of the anti-apoptotic protein Bcl-X(L), the regulation of cell cycle pro AMPAR potentiation, AMPAR membrane trafficking and synaptic plasticity. Regulates AMPAR tor activity-dependent actin reorganization in dendritic spines. May mediate cross-talks between oxylation in the kidney, and sterol C-27 hydroxylation in the liver.

it mediates the transport of the cationic amino acids (arginine, lysine and ornithine), and it has lls and natural killer (NK) cells, has role in the regulation of size, number and exocytosis of lytic

PubMed:18692468, PubMed:25263562, PubMed:25457612, PubMed:26449471, PubMed:26612

NA polymerase II as part of capped and polyadenylated primary transcripts (pri-miRNAs) that c

. In human, expression of a functional protein is regulated by alternative splicing. The protein-c em. The rank order of affinities for the leukotrienes is LTB4 > 12-epi-LTB4 > LTB5 > LTB3.

the proteome from stress, folding and transport of newly synthesized polypeptides, activation of NA polymerase II as part of capped and polyadenylated primary transcripts (pri-miRNAs) that c NR3C1, AR and PGR. Isoform 5 activates the U2 small nuclear RNA (snRNA) promoter.

'2) complex, mediates the polyubiquitination and subsequent degradation of CDT1, CDKN1A/p

tory synaptic responses. Involved in the suppression of glioma (By similarity).

bMed:26766442). Involved also in positive regulation of cell proliferation and tumor cell growth

Plays an important role in signal transduction.

and CEP170 for hierarchical subdistal appendage assembly (PubMed:28422092).

of the proteome from stress, folding and transport of newly synthesized polypeptides, activation of p

binding results in a clear conformational change analogous to the Venus fly trap mechanism (F

and apoptosis. A chromosomal deletion that includes this gene is one cause of Prader-Willi syndr

ocyte differentiation, proliferation and apoptosis, and is required for normal skeleton developme

regulation of oligodendrocyte differentiation during postnatal growth. Involved in dendritic arboriza

and blocking cell cycle progression. Functions in the nuclear localization and assembly of cycli

and cyclin A-CDK2 complexes. Forms a complex with cyclin type D-CDK4 complexes and is inv

ages.

NA polymerase II as part of capped and polyadenylated primary transcripts (pri-miRNAs) that c

ucose transport (By similarity).

CM2 subunit at 'Ser-40' and 'Ser-53' and then is involved in regulating the initiation of DNA repli

o includes PYCARD, NALP2 and CASP1 and whose function would be the activation of proinfla

large repulsion. Acts as a pro-adhesive molecule, enhancing the adherence of cells to immobili



an important role in the regulation of cell survival, cell division, cell differentiation and cell migration. Its function seems to depend on the association with the katanin complex formed by KATNA1 and KATNB1.

PubMed:26686862, PubMed:30463011). Negatively regulates ligand-induced Notch activity probably

in the regulation of DNA-replication and cell division. Key effector of the RBBP6 and ZBTB38-mediated regulation of DNA-replication and cell division.

Associated with epilepsy type 5. [provided by RefSeq, Dec 2011]

PubMed:684392, PubMed:16492674, PubMed:27907090, PubMed:14506133, PubMed:14578375, PubMed:17651496,

PubMed:19114591, PubMed:27499292, PubMed:20739937). Replaces

the function of chromosomes at the spindle equator resulting in the formation of the metaphase plate and kinetochore vesicles and the microtubule network through its association with STX4 and SNAP25. Acts as a GTPase, and for G protein-effector interaction.

binds to the promoters of CLDN7 and KRT8 and, in association with histone demethylase KDM1A

is thought to promote expression of ZEB1. Expression of this gene is correlated with tumor progression. Promotes expression of GLI1, GLI2 and GLI3 by opposing the effect of SUFU and promoting their nuclear localization (PubMed:17651496, PubMed:19114591, PubMed:27499292, PubMed:20739937).

Participates in NF-kappa-B transactivation of IL2. Participates in energy homeostasis by sequestering the kinase in the cytoplasm and preventing its nuclear translocation and metastasis formation, and in regulating extracellular-regulated kinase (ERK1 and ERK2) activity.

Interacts specifically to the activation domain of HIV-1 Tat and can also interact with the HIV-2 and EIAV Tat proteins.

Expressed in the spleen, where senescent erythrocytes are sequestered and destroyed. Exhibits cyto

NA polymerase II as part of capped and polyadenylated primary transcripts (pri-miRNAs) that c  
ock, which is essential for coordinated somite segmentation (By similarity).

y also play a role in T-cell antigen receptor/TCR signaling, interleukin-2 signaling, apoptosis an  
f Wnt4 (By similarity). Necessary to maintain the differentiated epithelial phenotype in renal cel  
n in T-cells.

zed by the POLO box domains. Phosphorylates ATF2, BCL2L1, CDC25A, CDC25C, CHEK2, F  
of PROX1 and other genes coding for lymphatic endothelial markers. Plays an essential role ir  
15235793, PubMed:15239953, PubMed:15548592, PubMed:17535814). Required for kinetoc  
NA polymerase II as part of capped and polyadenylated primary transcripts (pri-miRNAs) that c

zes type II iodothyronine deiodinase/DIO2. Confers constitutive instability to HIPK2 through prc  
pendent manner.

ay play a role in limb-pattern formation. In osteoblasts, suppresses transcription driven by the c

minal region. The protein plays a role in small GTPase-mediated signal transduction and the o  
, cell-cell adhesion, cell differentiation, proliferation and migration. Positively regulates microRN  
s (HAT) (PubMed:29973595, PubMed:31527837). KAT2A recruitment specifically promotes ac  
wth acute and chronic vascular inflammation in conditions such as atherosclerosis and in particu  
n, motility, migration and cell cycle, functions in neuron growth and ion channel regulation, and  
d in early and late stages of mammalian cardiovascular development. Inhibits myoblast differen  
ic activity. The receptor for this protein is RON tyrosine kinase, which upon activation stimulate  
er lipids, such as D,L-threo-dihydrosphingosine, N,N-dimethylsphingosine, diacylglycerol, cerar  
è enhancer elements of a number of cellular promoters, including those of the class I MHC, inte  
). Mediates the initial step of glycolysis by catalyzing phosphorylation of D-glucose to D-glucos  
Med:15601820, PubMed:21199876). Negatively regulates nitric oxide (NO) production and limi

multiple phase I and II xenobiotic chemical metabolizing enzyme genes (such as the CYP1A1 gene) form that is able to recruit to membranes different set of downstream effectors directly respon

required in the control of cell shape.

required for the biosynthesis of normal levels of retinoic acid in the embryonic ocular and nasal region. AKT1, 'Ser-660' of PRKCB isoform beta-II and 'Ser-657' of PRKCA. Akt regulates the balance

forms perform diverse functions such as inducing growth and differentiation of epithelial, glial, and hematopoietic cells. Promotes angiogenesis through regulation of expression of genes controlling endothelial cell migration and proliferation. Oxidizes long chain aldehydes into non-toxic fatty acids (PubMed:1737758). Preferentially oxidizes long chain aldehydes into non-toxic fatty acids. Acts on the negative limb of the circadian clock by directly repressing the expression of core clock components; acts early to enhance canonical WNT-signaling by repressing expression of TLE4, and acts on the positive limb of the circadian clock by directly repressing expression of CLOCK, and acts on the positive limb of the circadian clock by directly repressing expression of CLOCK, and roles in inflammation and immune response. The encoded type 2 transmembrane protein is involved in cell cycle regulation (PubMed:15601820, PubMed:21199876). Negatively regulates nitric oxide (NO) production and limits single-stranded DNA with high affinity in a sequence-independent manner, while isolated su

regulates MCM2 subunit at 'Ser-40' and then is involved in regulating the initiation of DNA replication. The cytoplasmic intracellular domain. May be required for tumorigenesis of a subset of gastric adenocarcinomas. Regulates microtubule spindle dynamics. Increases the rate of turnover of microtubules on metaphase spindles, and c

regulates MCM2 subunit at 'Ser-40' and then is involved in regulating the initiation of DNA replication. The cytoplasmic intracellular domain. May be required for tumorigenesis of a subset of gastric adenocarcinomas. Regulates microtubule spindle dynamics. Increases the rate of turnover of microtubules on metaphase spindles, and c

(PubMed:16461343, PubMed:18056643). Associates with and probably dephosphorylates CBLN1 and binds to some phosphorylated proteins and promotes their ubiquitination and degradation (P

catalysis. Forms an active ribonucleotide reductase (RNR) complex with RRM1 which is expressed in neurons. Regulates actin filaments. Causes the formation of many neuritic processes from the cell body with disru

specific motif recognized by the POLO box domains. Phosphorylates CENPJ, NPM1, RAPGEF1, and RAP80. PAN activity is stimulated by poly(A)-binding protein (PABP). PAN deadenylation is followed by rapid degradation of the poly(A) tail. Apelin-36 has a greater inhibitory activity on HIV infection than other synthetic apelin derivatives,

s, which are important for efficient cargo delivery and trafficking in axons. Thereby also require

receptor substrates but exhibit different Km values.

required for the biosynthesis of normal levels of retinoic acid in the embryonic ocular and nasal region. AKT1, 'Ser-660' of PRKCB isoform beta-II and 'Ser-657' of PRKCA. Akt regulates the balance

ence to DNA cross-linking drugs, and prevention of chromosomal breakage (PubMed:20347428). Regulates histone H3 methylation at 'Ser-27' of histone H3 to form H3K27me1, H3K27me2 and H3K27me3, respectively. Required for ei

tially binds to telomeres that have a low concentration of shelterin complex and acts as a regulator of MYC dependent cell transformation (By similarity). Also promotes cell tumor growth by inhibiting the formation of active Rag GTPase complexes. Preferentially binds inactive Rag

C25A15 (PubMed:19287344). Does not transport carnitine nor acylcarnitines (PubMed:246522) that may trigger signaling for repulsion (By similarity). Functions as netrin receptor that negatively regulates cell migration and cell adhesion. Also inhibits hypoxia-inducible ARNT-mediated gene expression. [Isoform 3]: Attenuates

activity with C18:1 or palmitate (C16:0), and lower activity with C18:0 and C6:0 lysophosphatidic acid.

protein-coding potential. [provided by RefSeq, Jul 2008]

involved in cell adhesion, signal transduction, tumorigenicity and metastatic behavior of malignant cells. Also involved in DNA replication fork progression, preventing replication pausing and double-strand breaks (DSBs) at G4 motifs. Involved in

in the actin-based neuronal function (By similarity).

involved in the generation of an enediolate intermediate that is stabilized by the magnesium ion (PubMed:246522). Also involved in the regulation of RB (paired immunoglobulin-like type 2 receptor beta) genes on chromosome 7. The readthrough

involved in the incorporation of newly synthesized CENPA into centromeres via its interaction with the CENPA-NAC tumor suppressor gene candidate. A chromosomal translocation t(12;22)(p11.2;q13.3) leading to

involved in the regulation of NR1H2/LXR-beta, acts as an essential transcriptional regulator of lipid metabolism. Plays a

is a 5-10-fold higher activity on neutrophil activation, IL-8(5-77) has increased activity on neutrophil chemotaxis. The structure of some of these variants cannot be determined. [provided by RefSeq, Nov 2015]

independent apoptosis by repressing AKT1 activity. Its direct transcription regulation by p53/TP53 mediated by the p53 domain. Also acts as a ubiquitin ligase E3 toward itself and ARRB1. Permits the nuclear export

of the p53 domain, a disintegrin-like domain, and a thrombospondin type 1 (TS) motif. Individual members of this family have diverse cellular functions not only in skeletal and cardiac muscle development, but also in neuronal cell migration. IL-8(3-72) and SDF-1-alpha(3-67) show a reduced chemotactic activity. Binding to cell surface p

rotein receptors (PubMed:21788334, PubMed:30026317). Also functions as a catalytic subunit of a TRAMP complex that targets 3' UTR of genes on the short arm of chromosome 16. A duplicate read-through locus also exists between the TRAMP3 and TRAMP4 genes. Mediates activation of NF-kappa-B. Triggers increased phosphorylation of p38. Enhances transcriptional activation mediated by SOX18. Plays an essential role in hippocampal long-term potentiation (PubMed:5627, PubMed:25816751). Mediates negative transcriptional regulation of CDC25B expression. Mediates MBD1-dependent transcriptional repression, probably by recruiting complexes containing S

trapped in the plasma membrane. Additionally, may also function as a lipid-presenting protein to enhance the activity of

the TRAMP3 as an E3 ubiquitin-protein ligase regulating NF-kappa-B signaling and regulates both canonical and

non-canonical NF-kappa-B signaling. Ubiquitinates RNA polymerase II as part of capped and polyadenylated primary transcripts (pri-miRNAs) that contain a specific Lys residue. Ubiquitinates different Lys residues of the ubiquitin (polyubiquitin chains) or a linear polymer linked via the initial

ubiquitin. Ubiquitin M2-7 ring are formed through the interaction surfaces of two neighboring subunits such that a wide range of biologic activities. [supplied by OMIM, Jan 2003]

ient cascade of caspases (aspartate-specific cysteine proteases) mediating apoptosis. FAS-me  
n the peroxisomal beta-oxidation of fatty acids.

of NF-KB protein into the nucleus, resulting in suppression of apoptosis of bladder cancer cells  
vent apoptotic death.

delivers them into the growing sperm tail.

ontrols the reabsorption of sodium in kidney, colon, lung and sweat glands. Also plays a role in

arms, the inactivation of anaphase-promoting complex/cyclosome (APC/C) inhibitors, and the r  
osome alignment and segregation and is required for chromatin-induced microtubule stabilizati  
527, PubMed:19221179, PubMed:20543840, PubMed:21245099). Binds to the insulin respons

Implicated in regulating a variety of cellular processes, including cellular growth, senescence, c  
l cell proliferation, migration and tube-like structures formation (PubMed:24463812). Modulates

ragment and 7m-GDP (By similarity).

o. Displays serine/threonine protein kinase activity. Plays an important role in the regulation of  
Implicated in regulating a variety of cellular processes, including cellular growth, senescence, c

e differentiation.

notes proteasomal degradation of MCL1. Competes with BAK1 for binding to MCL1 and can dis

for the mitotic checkpoint.

causes tumor formation. Involved in intracellular protein trafficking of a number of proteins. Ta  
bridging TBK1 to MAVS which leads to the activation of TBK1 and phosphorylation of IRF3 and

lation of ERK1/2 (By similarity). Inhibits TGFB-induced epithelial-to-mesenchymal transition in I

otic spindle organization and chromosome segregation (PubMed:24981860). Plays a role in reg  
After ligand binding to the receptor, the resulting complex is internalized and transported to a s  
und forms of RAB6A and RAB6B. May act as a motor required for the retrograde RAB6 regulat  
ion, and in melanogenesis. KITLG/SCF binding can activate several signaling pathways. Promc

breaks located either 5' or 3' to the mismatch. Also exhibits endonuclease activity against 5'-o

omotes maturation and normal function of calvarial osteoblasts, including expression of the oste  
quired for the transition from pre-replication complex (pre-RC) to pre-initiation complex (pre-IC).  
nucleolus.  
ription by stabilizing the binding of inhibitory cofactors at the promoter. Isoform 2 activates tran

(PubMed:20616313). Essential for retinal progenitor proliferation. Required for suppressing rod  
onformation change that triggers signaling via guanine nucleotide-binding proteins (G proteins)  
ally conserved modification in the peptidyl transferase domain of the mtLSU rRNA.  
NA polymerase II as part of capped and polyadenylated primary transcripts (pri-miRNAs) that c  
rategy, relocates to autophagosomes where it interacts with autophagosome-associated proteins  
eraction with RIMS2 (By similarity).

gene. [provided by RefSeq, Nov 2017]  
some (APC/C), a cell cycle-regulated ubiquitin ligase that controls progression through mitosis.

Serves to alter COP1 substrate specificity by directing the activity of COP1 toward CEBPA (PubMed:11705987) by preventing phosphorylation of the STAG2 subunit of cohesin complex at the centromere, calcium-regulated exocytosis.

(similarly). Inhibits cardiac hypertrophy through the calmodulin-dependent kinase II (CaMKII) pathway.

and covers a substantial fraction of the chromosome surface (PubMed:27362226). Prevents chromatin decondensation in macrophages. This CSF induces granulocytes.

Release from granule cells leading to regulate cell differentiation and survival during cerebellar development. Inhibits sinoatrial node (SAN) head area.

Ensures normal timing of sister chromatid segregation, and maintenance of spindle pole architecture.

Phosphorylates AKT1, AR, MCF2, WASL and WWOX. Implicated in trafficking and clathrin-mediated transport.

May negatively regulate the repressor activity of isoform 1 by binding to isoform 1, thereby preventing formation of repressor complexes, respectively (PubMed:10882109, PubMed:11278856, PubMed:11705987, PubMed:11705987).

Acts as a repressor element. Active transcriptional corepressor of SMAD2. Links the nodal signaling pathway to transcriptional repression.

Inhibits cell cycle progression in vitro and inhibits entry of cells into S phase.

Transmits TGF $\beta$ 1, TGF $\beta$ 2 and TGF $\beta$ 3 signal from the cell surface to the cytoplasm and is thus regulating a pleiotropic signaling pathway. It is fused in-frame to the 3-prime end of the SSX1 (MIM 312820), SSX2 (MIM 300192), or SSX4 (MIM 300193).

Acts as a corepressor (PubMed:11705987), thereby playing a central role in histone code. Specifically binds trimethylated 'Lys-4' of histone H3.

Through its interaction with GDF5 and, probably, GDF6 (PubMed:21976273, PubMed:26643732). It has activity on trimethylated H3 'Lys-9', while it has weak or no activity on trimethylated H3 'Lys-9'. Demethylation of Lys residue is essential for cell development, migration and function, and in melanogenesis. In response to KITLG/SCF binding, it acts as a transcription factor in endoplasmic reticulum (ER) stress response (PubMed:15322075, PubMed:15322075).

Acts as a transcription factor in endoplasmic reticulum (ER) stress response (PubMed:15322075, PubMed:15322075).



and TGFBR1 ubiquitination and proteasome-dependent degradation. Promotes ubiquitination

ombin and nerve growth factor (By similarity). May be involved in cAMP-induced activation of N  
PubMed:28471450, PubMed:28609714). Negatively regulates the part of the TLR4 signaling pat

ormamidopyrimidine (Fapy) and 5-hydroxyuracil. Has marginal activity towards 8-oxoguanine. F

robrevin, dystrophin, talin-1, utrophin and vinculin, is able to link these heteropolymeric IFs to a  
-1, MMP-2, MMP-3, MMP-7, MMP-9, MMP-13, MMP-14 and MMP-15.

ias and solid tumors. Two non-protein coding transcript variants have been found for this host

that contributes to gene activation by histone phosphorylation and functions in the regulation c  
mottled pigmentation, telangiectasia, epidermal atrophy, tendon contractures, and progressive

NA polymerase II as part of capped and polyadenylated primary transcripts (pri-miRNAs) that c  
T1 methyltransferase to ensure faithful propagation of the DNA methylation patterns through I

PubMed:19478087). It is involved in the negative regulation of the angiotensin-activated signaling  
tal myogenesis. Also involved in controlling cell division of progenitor cells and regulating the si

NA polymerase II as part of capped and polyadenylated primary transcripts (pri-miRNAs) that c  
erning and skeletogenesis.

f T-cells and limits T-cell effector response (PubMed:11015443, PubMed:28813417, PubMed:2

pathway, ZFYVE9/SARA recruits the intracellular signal transducer and transcriptional modulat

NA polymerase II as part of capped and polyadenylated primary transcripts (pri-miRNAs) that c  
arity). Recognizes and binds the X-box, a regulatory motif with DNA sequence 5'-GTNRCC(0-3

on, playing a critical role in biological processes such as cell migration and proliferation. Also fu  
ng different isoforms have been observed for this gene. [provided by RefSeq, Jan 2009]

ie RXR/RAR heterodimers bind to the retinoic acid response elements (RARE) composed of ta  
a role in cell trafficking, notably of the Schwann cell, and is necessary for the maintenance and

gradation and muscle atrophy (PubMed:23401856). Negatively regulates PI3K-AKT pathway a

inserting one oxygen atom into a substrate, and reducing the second into a water molecule, with

rather than out of it. Their voltage dependence is regulated by the concentration of extracellular p  
during angiogenesis (PubMed:18424730, PubMed:23696226, PubMed:25363763). Its coinhibi

by GTP, and for G protein-effector interaction.

tivity. Catalyzes the recognition of homology and strand exchange between homologous DNA p  
script variants of this gene. [provided by RefSeq, Jul 2013]

ternates between an active, GTP-bound state and an inactive, GDP-bound state. Signaling by

NA polymerase II as part of capped and polyadenylated primary transcripts (pri-miRNAs) that c

tion factors during embryonic development. Plays an important role in maintaining embryonic s  
(PubMed:16424001, PubMed:16730711). Enhances the proliferation of follicular dendritic cell

the TCR beta enhancer. Represses cyclin D1 transcription by recruiting HDAC1 to its promoter

PubMed:12133952).

PubMed:20080638). Involved in adipogenic differentiation (PubMed:19190184).

ivity and SIRT1 is proposed to contribute to T-cell hyperactivation during infection. |[Isoform 2]:  
osomes. May play a role in regulating the period length of ARNTL/BMAL1 transcriptional oscillat  
ogenic gene expression upon cAMP signaling pathway stimulation (PubMed:17210646). Involv  
s transcription of NF-kappa-B target genes. Contributes to the regulation of cell proliferation (B

PubMed:22278742). Associates specifically via disulfide bonds with the Latency-associated peptide  
a large number of inositol polyphosphates that are important in cellular signaling. Both calcium/

ase of transforming growth factor beta-1 (TGF-beta-1) from regulatory Latency-associated peptide in a cellular environment by damaged epidermal cells.

NA polymerase II as part of capped and polyadenylated primary transcripts (pri-miRNAs) that contain protein-free DNA (By similarity). Among other functions, seems to be involved in cell death by apoptosis. The protein complex acts via chromatin remodeling and modification of histones; it mediates monoubiquitination

of transcription factors from promoters with several copies of the Tcf motif 5'-CCTTTGATC-3' in the presence of the protein complex. BAZ2A/TIP5 by controlling its USP21-mediated deubiquitination (PubMed:21914818, PubMed:15111111)

is to inhibit the activity of the anaphase-promoting complex/cyclosome (APC/C) by blocking the complex at the kinetochore, being required for the subsequent localization of CENPF, BUB1B, CENPE

is the pre-replication complex necessary to initiate DNA replication.

is the human UFSP1 protein is shorter on the N-terminus and lacks a conserved Cys active site. It is a GTP-binding adapter molecules on the cell surface.

is, protects centromeric cohesion complexes until metaphase II/anaphase II transition, preventing

incorporation of newly synthesized CENPA into centromeres via its interaction with the CENPA-NAC nucleosomal DNA within the nucleosome core region. May function as transcriptional co-repressor. May stabilize the CENPE-BUB1B complex at the kinetochores during early mitosis and may interact in addition to several beta-2 integrins. [provided by RefSeq, Jan 2013]

is important for cell growth and to inhibit hair follicle induction (By similarity).

is required for the activation of AURKB and is involved in the ubiquitination of ASSF7 protein via the ubiquitin-proteasome pathway. Required for the activation of AURKB and

is involved in the regulation of ATF4 which plays a central role in osteoblast differentiation. May inhibit histone deacetylase activities which can associate with this corepressor. Involved in the repression of cell proliferation (By similarity). May regulate WDR65 transcription (By similarity).

is enriched with short-chain fatty acyl groups (tributyryl) and long-chain fatty acyl groups (triolein) with significant similarity to the Notch-induced endocardial epithelial to mesenchymal transition, which is itself critical for cardiac

to convert CMP-N-acetylneuraminic acid (CMP-Neu5Ac) into its hydroxylated derivative CMP acids to control fatty acids composition of cellular lipids in brain (Probable).

osine-regulated kinases (DYRKs) autophosphorylate a critical tyrosine residue in their activation, leading to target the PHF2-ARID5B complex to target promoters, where PHF2 mediates der

ion of many genes expressed during hematopoiesis, inflammation, immune responses and cell p

FOS proteins have been implicated as regulators of cell proliferation, differentiation, and transl in the control of cardiac fibrosis. It is also involved in the control of cardiac hypertrophy acting th cing the TCEA1 binding site. Required for mitotic chromosome separation after cross-over ever ase the intron. The products are an intron and two tRNA half-molecules bearing 2',3'-cyclic pho: reby mTORC1. Binding of arginine to CASTOR1 allosterically disrupts the interaction of CASTO

hosphatidylcholine (PubMed:24097981). Plays a role in lipid homeostasis and macrophage-me

th the GAR1 protein. [provided by RefSeq, Apr 2009]

spoon silencing is thus critical for maintaining genome stability, in particular in germline cells w al for neuronal development, and that of CDK2 by WEE1, which leads to decreased CDK2 activ gulation, DNA repair, DNA replication and chromosomal stability. DNA accessibility is regulated

x in the ER thus preventing it from escorting SREBPs to the Golgi. Initiates the sterol-mediated

esults showing activation by WNT7B have been described for mouse (By similarity). Functions cardiac transcriptional activators GATA4 and GATA6.

onical signaling pathway leads to the activation of disheveled proteins, inhibition of GSK-3 kina (similarity). Induces apicobasal cell elongation by redistributing gamma-tubulin and directing th

quitation of KRT14 and controls its levels during keratinocytes differentiation (PubMed:277986

NA polymerase II as part of capped and polyadenylated primary transcripts (pri-miRNAs) that c

182175) and a 7SL RNA molecule, such as RN7SL1, that is partially homologous to Alu DNA (PubMed:31672913). In low-amino acid conditions, component of the lysosomal folliculin complex has been suggested, but their full length natures are not clear. [provided by RefSeq, Jul 2013] and is required for chromatin-induced microtubule stabilization and spindle assembly. Acts as a component of a kinase cascade wherein MST1/MST2, in complex with its regulatory protein SAV1, phosphorylates (snRNAs) (Gu et al., 2005). [supplied by OMIM, Mar 2008] (OMIM:3709802, PubMed:27485036). Involved in the cytolytic activity of natural killer cells and cytotoxicity. The function of the enzymatically inactive isoforms remains unknown.

γ-mediated apoptosis and is required for the increased motility and invasiveness of CD95-activated cells. Involved in DNA repair, DNA replication and chromosomal stability. DNA accessibility is regulated

genes involved in a large spectrum of important biological functions including proper eye, face, and cell leading edge. Promotes filipodia formation (By similarity). Functions synergistically with PELI1 on activin A than on activin B. Involved in bone formation; inhibits osteoclast differentiation.

PubMed:9315713). May regulate genes that protect epithelial cells from bacterial infection (PubMed:10811113).

sequence identity with RANBP2, a large RAN-binding protein localized at the cytoplasmic side of the nuclear pore.

is the predominant proteoglycan present in cartilage and is distributed on the surfaces of many cells. Promotes proliferation of hepatocytes in response to liver damage. Binding to its receptor formed by IL6ST

transfers cargo from the Golgi apparatus of a variety of secretory cargos.

ubiquitination and subsequent proteasomal degradation of TRAF family members and RHOA. Promotes

transcriptionally repressive state of genes: acts as a chromatin compaction factor by recognizing and GATA3. Such heterodimer can both activate or repress transcriptional activity, depending on and 28S rRNA. Has diphosphatase activity and removes m7G and/or m227G caps from U8 snof mediated signaling. Required for the localization of ECT2 to the central spindle. Plus-end-directe

ogenesis of ectodermal organs. Functions as a ligand activating the DEATH-domain containing lesions spiroiminodihydantoin (Sp) and guanidinohydantoin (Gh) in both ssDNA and dsDNA; a

cific manner. In vitro, modulates KCND2/Kv4.2 and KCND3/Kv4.3 currents. Involved in KCND2

ess of kinetochore-spindle attachment and inhibits the activity of the anaphase promoting com

22108654, PubMed:21477596, PubMed:23949095). Thereby, acts as a central switch between events including the establishment of mitotic spindle, centrosome duplication, centrosome sep

of proinflammatory genes. May block the BMP-SMAD1 signaling pathway by competing with S

s preventing SMAD2 access. Functions as an adapter to recruit SMURF2 to the TGF-beta rece

Also functions as a transcriptional coactivator in the TGF-beta signaling pathway by increasing t

computer predictions indicate that this region of the 3' UTR contains hairpin-forming self-comple

plex and shields approximately 20 base pairs, and recognizes single base mismatches and dinu

), PubMed:9261177, PubMed:16373578, PubMed:22942274, PubMed:26859324, PubMed:27

ies DNA damage signals, leading to enhancement of apoptosis.

643323). MMEJ is an error-prone repair pathway that produces deletions of sequences from th

46435). Binds to its receptor, GFRAL, and activates GFRAL-expressing neurons localized in the brain. Involved in DNA replication. The DRTF1/E2F complex functions in the control of cell-cycle progression and helps regulate downstream signaling cascades (PubMed:23166352). Helps recruit the ESCRT complex through the phosphorylation of actin dynamics regulators such as PKN2. Is a negative regulator of cyclin D1 protease, which may be associated with various inflammatory processes as well as development of the nervous system. Binds to RNA polymerase II as part of capped and polyadenylated primary transcripts (pri-miRNAs) that control the expression of various activators and repressors. TAF4B is a transcriptional coactivator of the p65/RELA NF- $\kappa$ B complex. Inhibits the activity of spinal MAPK1/3 and MAP kinase p38 induced by peripheral surgery, which drives the release of proinflammatory cytokines (PubMed:26583432, PubMed:15016378, PubMed:24879834). Regulates signaling pathway leading to the activation of JUN and MYC (PubMed:24344117). May play also a role in cell proliferation through activation of cyclin D1. Binds to phosphorylated target proteins during skeletal muscle atrophy. Recognizes TERF1. Binds to DP proteins and specifically recognizes the E2 recognition site 5'-TTTC[CG]CGC-3'. Directly binds to RNA polymerase II as part of capped and polyadenylated primary transcripts (pri-miRNAs) that control the expression of various activators and repressors in a p53/TP53-dependent manner, resulting in the pentose phosphate pathway (PPP) activation and inhibition of the activity of CNOT7 and CNOT8. Involved in cell cycle regulation. Could be involved in the growth of the nervous system (PubMed:11070). Can metabolize vitamin D analogs/prodrugs 1 $\alpha$ -hydroxyvitamin D(2) (doxercalciferol) and its analogs containing the sequence 5'-TGTGGT-3', or very rarely, 5'-TGCGGT-3', within their regulatory regions via inhibition of cellular proliferation. It is mitogenic for fibroblasts, but not endothelial cells. It is able to bind EGF receptor. Cooperates with CDC6 and the origin recognition complex (ORC) during G1 phase of the cell cycle. Is a component of a kinase cascade wherein STK3/MST2 and STK4/MST1, in complex with its regulator, phosphorylate and activate each other. The metabolic route allows the elimination of L-methionine and the toxic metabolite L-homocysteine (Folp) from the 3M complex, which inhibits CUL9 activity, leading to prevent ubiquitination of BIRC5. Inhibits neurotransmitter release, possibly by regulating Ca(2+)-sensing. In the cerebellum, may inhibit SNARE-mediated vesicle fusing cell growth (PubMed:9748269, PubMed:10207080, PubMed:16131492). Represses transcription of the ciliary compartment.

resistant to the inhibitory effects of CDKN2A/p16INK4A.

ivery of the misacylated tRNA to the ribosome and incorporation of ROS-damaged amino acid

iquitin-mediated proteasomal degradation mechanism.

: (PubMed:22327364). Plays a role in metaphase spindle orientation (PubMed:22327364). Play

ion as a regulator of vesicle transport, through interactions with the JNK-signaling components  
15203199). Can repress the expression of MMP7 in a ZBTB33-dependent manner (PubMed:2

timulation of acute-phase protein synthesis in hepatocytes.

igodendroglia in the developing spinal tube (By similarity). Binds to the gene promoter of MBP

nal snRNPs contain a common set of Sm proteins SNRPB, SNRPD1, SNRPD2, SNRPD3, SNI  
activation with the PAR3 complex. Plays a redundant role with FRMD4A in epithelial polarizatic

al negative limb of the circadian clock by directly repressing the expression of core clock compo  
) single-stranded DNA, in particular to polypyrimidines. The SOSS complex associates with DN

which contributes to the functional inactivation of these proteins (PubMed:15870257, PubMed:1  
hich is involved in the control of centrosome separation and bipolar spindle formation in mitotic

an essential step to ensure completion of synapsis. Not required for HORMAD1 functions in p  
HIV-1 infection, may function as a receptor for extracellular Tat in neurons, mediating its intern

ional activators and repressors of the Wnt/beta-catenin and MAPK/ERK pathways, respectively  
l lysophosphatidylcholine (lyso-PC). May be involved in bioactive N-acylethanolamine biosynthe

NA polymerase II as part of capped and polyadenylated primary transcripts (pri-miRNAs) that c

spindle in response to adhesion or growth factor signals initiating cell proliferation. May play an i



pholipids. Phospholipid translocation seems also to be implicated in vesicle formation and in up  
ay a role in organizing centrosomal microtubules. May act as a tumor suppressor protein. May r  
inding to regulator loci of RORC to modulate expression (By similarity).

F-like domains resulting in inhibition of NOTCH1 activation by JAG1 and enhancement of NOTC

Second, by enhancing signaling from ABL1 and ABL2, which regulate cytoskeletal remodeling.  
s of the current expressed by the KCNMA1 channel. Isoform 2, isoform 3 and isoform 4 partial

ulate energy expenditure associated with the browning of the white fat depots and improves g  
invasive activity, and promotes cancer metastasis.

n p53/TP53. Regulates ER stress-induced neuronal apoptosis (PubMed:23340338).

ally with RUNX1 to transactivate the IL3 promoter (By similarity). Also transactivates the PRF1 p  
romotes their expression, thereby neutralizing reactive electrophiles (PubMed:11035812, Publ  
and proliferation but also the differentiation and programmed death of T-lymphocytes as well as  
n of neuronal progenitor cells in the developing brain and for normal brain development. Does  
naling pathway.

eq, Dec 2008]

RNA sequesters P-TEFb in a large inactive 7SK snRNP complex preventing RNA polymerase  
K2 and MAPK3/ERK1 (PubMed:28111074). May be an activator of the JNK/SAPK pathway.

arily and structurally related but have limited sequence homology, with the exception of the cer  
on and is required for chromatin-induced microtubule stabilization and spindle assembly. Major

heir mature forms.

idance (By similarity).

inated EGFR at the cell membrane.

s phosphorylated promoting ubiquitination and degradation, enabling the dimeric RELA to tran

g the same protein, have been identified. [provided by RefSeq, Nov 2008]

s an inhibitor of centrosome reduplication.

anced hematopoietic activity.

vefold higher chemotactic activity for neutrophilic granulocytes.

oRNPs) involved in pre-rRNA processing and modification. snoRNAs of the box C/D class, like  
rane in polarized epithelial cells.

· epithelium and in the formation of ducts in prostate. Acts as a tumor suppressor controlling pr  
of the cytosine methylation status (PubMed:25258363, PubMed:25999311). Regulates the tran

sts of CTF18, CTF8, DCC1, RFC2, RFC3, RFC4 and RFC5. The CTF18-RFC complex binds to

ro.

that mediate the transfer of ARC mRNA into new target cells, where ARC mRNA can undergo

y).

quired for the stable expression of this protein. [provided by RefSeq, Jul 2008]

ors residing on adjacent cells, leading to contact-dependent bidirectional signaling into neighbo

complex is inactive and in anaphase the CDC20-APC/C binary complex is active in degrading

romotes G2-M transition, and regulates G1 progress and G1-S transition via association with r  
mechanisms.

n 2012]

acts with FAM111A to overcome host range restriction (PubMed:23093934).

mor growth (PubMed:20123964, PubMed:21569306). Also plays a role in integrin-mediated ce

led:15769988, PubMed:17635946, PubMed:19141540, PubMed:21664385). Mediates glucoc

tion (By similarity).

high affinity and on E-box motifs: 5'-CANNTG-3' with low affinity (By similarity). May play a rol

drome, an autosomal recessive skeletal dysplasia. Alternative splicing results in multiple transc

EHHADH, catalyzes the hydration of trans-2-enoyl-CoA and the dehydrogenation of 3-hydroxy

as well as mediating neurotransmission in the central nervous system.

æ, and is required for normal levels of marginal B-cells in the spleen and normal migration of sp

P is used as phosphate donor, the enzyme phosphorylates AMP, CMP, and to a small extent c

CoA that is utilized mainly for oxidation under ketogenic conditions (By similarity). Involved in th

phine (PubMed:9169443). Hydrolyzes aspirin, substrates with large alcohol group and small ac

tion. This ciliogenic function is mediated in part by the Rab8 GDP/GTP exchange factor, which

ement seems to require its catalytic activity (PubMed:19531583, PubMed:20923837). Required

iggers the caspase-independent apoptosis by altering mitochondrial membrane permeabilizatio

l regions (PubMed:22055184). Part of the ASC-1 complex that enhances NF-kappa-B, SRF an

26479788, PubMed:27796300). Within the complex, enhances DTX3L E3 ligase activity which

ent. Protects neurons from apoptosis, both by inhibiting JUN phosphorylation by MAPK10 and b

ed to its ATPase activity which is essential for its chaperone activity. This cycle probably induc

do not bind calcium in vitro. Isoform 4 probably does not bind calcium.

restoration and utilization of iron when cellular iron levels are low. Binds to iron-responsive elem

the ligand.

le in signal transduction.

l membrane trafficking of recycling endosomes (PubMed:15020713, PubMed:17233914, PubMed

ling. Induces macrophage recruitment, increased interstitial pressure, and blood vessel matura

ged and normal DNA, cooperates with the heterotetrameric (REV3L, REV7, POLD2 and POLD

with phase of the hair follicle, into catagen the apoptosis-induced regression phase (By similari

HT and homotrimeric LTA/lymphotoxin-alpha and the immunoglobulin superfamily members B'

all GTPases. May enhance the guanine nucleotide exchange factor (GEF) activity of DOCK1 and controls the formation of the retinotectal map (PubMed:23307924). Required for normal function, degradation, or transcytosis. Also known as interceptor (internalizing receptor) or chemokine receptor. Potentiates neurite outgrowth. May be involved in brain development by regulating En-1 and

other synaptic proteins. May promote the initial formation of synapses, but is not essential for DPE (a derivative of enkephalin lacking an N-terminal tyrosine residue), estrone-3-sulfate, taurine and specifically to a single methyl-CpG pair. Represses transcription in a methyl-CpG-dependent

FOXO1 and its apoptotic function by enhancing the interaction of FOXO1 with SIRT1 and FOXO2 (PubMed:27184406). Probably plays a central role in cytosolic lipid accumulation. In liver, is primarily

PI(4,5)P2 > PtdIns(3,5)P2 > PtdIns(3,4,5)P3. Plays a role in the biogenesis of endosome and autophagosome catabolism. Ketone bodies (beta-hydroxybutyrate, acetoacetate and acetone) are essential as a fuel for norepinephrine.

With the activation of the adrenergic receptor ADRA1B and leads to the activation of MAPK14. Involved in cardiac development and angiogenesis.

(PubMed:12794138, PubMed:19416870, PubMed:22692454, PubMed:23846752). In complex with other proteins, they regulate the Wnt signaling pathway (PubMed:29374064). Probably plays a role in the development of a two-step reaction: the amino acid is first activated by ATP to form a covalent intermediate with AMP, dAMP, CMP and dCMP with ATP as phosphate donor and of CMP with GTP as phosphate donor.

In target cells of infection and the initiation of reverse transcription, it can induce the conversion of

08]

in down-regulation of SIRT1 and thereby is involved in regulation of p53/TP53-dependent apo

SRIF1 from the cytoplasm to the mitochondrion. Also plays a role in steroidogenesis through modification (18:1 or 18:2) on the sn-2 position. Able to transfer phosphatidylcholine (PC) and phosphatidylserine synthesis, oxygen sensing and signal transduction. May also activate CYBB/gp91phox and NCF1.

and proinflammatory cytokines. Its ligands include mRNA lacking 2'-O-methylation at their 5' cap and tartrate and the reversible oxidation of (S)-malate to oxaloacetate.

(PubMed:25047030, PubMed:18035827, PubMed:9662422, PubMed:18182499). Responsible

response to pathogen-associated molecular patterns, such as intracellular poly(dA:dT), but not poly(dG:dC) (PubMed:18182499). Inhibits the activity of emedaximil and lenampicillin (PubMed:18182499).

independent interactions (By similarity).

(PubMed:20375010). Acts as a receptor for dengue virus (PubMed:24074594).||Claudins function as cell-cell junctional proteins encoding different isoforms. [provided by RefSeq, Jul 2013]

kinin, and for normal cell shape. Required for normal adhesion of keratinocytes to fibronectin and is up-regulated in tumor-associated vasculature.

Plays a role in nitric oxide synthesis in human umbilical vein endothelial cells (HUVECs) via transcriptional regulation of PPP1CA activity (PubMed:21798305, PubMed:21939755). Involved in the regulation of myelin sheath growth. Might have an important role in remyelination of denuded axons in multiple sclerosis. The non-claudin-like proteins.

binds to dsRNA. Exhibits antiviral activity against hepatitis C virus and vesicular stomatitis virus (VSV).

being identified as endogenous pyrogens, and are reported to stimulate the release of prostaglandin synthesis. Could be an adapter protein that facilitates and regulates interaction of KDR with effector phospho-Glu-tRNA(Gln).

For all substrates tested compared to GALNT2, it is able to transfer up to seven GalNAc residues.

in glia (By similarity).

signaling pathways. Functions as a negative modulator of EGFR signaling (By similarity). May act as a co-receptor. Plays a key role in the metabolism of xenobiotics and drugs containing aromatic azaheterocyclic

may participate in the maintenance/targeting of ion channels and cell adhesion molecules at the suggests that it might act as a tumor suppressor.

n. Has activity toward Muc1a, Muc2, EA2 and fibronectin peptides.

r that binds the cAMP response element (CRE), a sequence present in many viral and cellular ce, and a BED zinc finger. This gene lies within a region that is deleted in Williams-Beuren syndrome. S2 ligand to CMKLR1, a functional signaling receptors. Plays a critical role for the development

d double-strand-specific 3'-5' exonuclease activity, which are provided by MRE11. RAD50 may

promotes homotypic calcium-dependent aggregation and adhesion and clusters at intercellular junctional-epidermal cohesion. Is the target of linear IgA bullous dermatosis autoantibodies.

optum formation during embryogenesis, normal development of the gastrointestinal tract, normal (PubMed:24781757). Can act as a tumor suppressor (PubMed:20484225).

The proteins mediate signal transduction events that play a role in the regulation of cell development.

es F-actin. Involved in synaptic function by regulating neurite outgrowth in an actin-dependent manner. Associated with sporadic hepatocellular carcinomas, colorectal cancers, and non-small cell lung cancers. This

terminal binding. May interact with cellular G-protein signaling pathways. Can regulate neurite outgrowth with viral RNAs on which it homooligomerizes to form filaments. The homooligomerization allows for cell migration independently of RAC1, CDC42 and p21-activated kinase (PAK) activity.

PubMed:26405230).||Facilitator of innate immune signaling that acts as a sensor of cytosolic DNA

f cardiac hypertrophy by inhibiting intracellular calcium mobilization in response to angiotensin II (PubMed:860631). Has a high affinity for both cAMP and cGMP (PubMed:8557689). Modulates the amplitude of

stratum corneum) and epidermal glycerol content. Involved in skin hydration, wound healing, and

K-phosphorylated receptor and sterically preclude its coupling to the cognate G-protein; the bin

jection: required in both CA1 and subicular neurons for the precise targeting of proximal CA1 ε

able to mediate poly-ADP-ribosylation (PubMed:25043379). Has been shown to catalyze the m  
mRNA exon inclusion in muscle. Antagonizes the alternative splicing activity pattern of CELF p  
tion, stimulate cytotoxic T-cell activity, induce isotype switching in B-cells, and that has diverse  
lar poly(A)-specific ribonuclease PARN to remove the poly(A) tail, and the 3'-5' exoribonucleas

icking, in exocytosis, through its interaction with myosin VI and Rab8 (PubMed:27534431). Link

cell death of tumor cells. The ratio between the highly active tetrameric form and nearly inactiv

tion, in cell migration and many other physiopathological events. Plays a direct role in facilitatin  
ion by activating ARF6-signaling (PubMed:27044754).

ation synthesized transiently at sites of chromosomal damage to accelerate DNA strand break  
ilarity).

GTP-binding protein that does not act as an allosteric activator of the cholera toxin catalytic sub  
apoptosis initiation and execution. Acts as a pro-apoptotic component of the unfolded protein re

o make N-sulfated heparosan, a prerequisite substrate for later modifications in heparin biosyn  
er, which is further elongated by LARGE1, during synthesis of phosphorylated O-mannosyl glyco  
g development (By similarity). May be involved in actin cytoskeleton reorganization by cleaving  
ains. Important role in chondroitin chain biosynthesis in cartilage formation and subsequent enc  
roteins to the membrane, including AKT1 and PDPK1, activating signaling cascades involved in

ay play a role as physiological regulators of gastrointestinal, cardiovascular bioactivities mediat  
PubMed:23230272). Monoubiquitinates several histones, including histone H2A, H2B, H3 and  
calization of ACTN1 and PALLD to stress fibers. Required for cell migration and in maintaining  
, mitosis, cell-cell adhesion, cell differentiation, proliferation and migration. Contributes to the li  
idation-derived aldehydes. Involved in lysine catabolism.

and STAT5.

play a role in sperm motility (By similarity).

important for antigen-specific immune response, NK-cell mediated clearance, lymphocyte recirculation (PMIDs:16482215, PubMed:17079684, PubMed:16407242, PubMed:16407252, PubMed:16940174) and straight-chain acyl-CoA esters (with a chain length longer than four carbon atoms) (PMID:16482215, PubMed:17079684, PubMed:16407242, PubMed:16407252, PubMed:16940174). Plays a role in the maturation of sperm, includes cooperation with ANKRD27 and VAMP7 (By similarity).

Induced by Kaposi's sarcoma-associated herpesvirus/HHV-8 infection, is degraded by viral E3 ubiquitin ligase MIR2, presumably to prevent viral replication. Plays a role in the regulation of ion and water transport and thus raise extracellular fluid volume and blood pressure (PMID:16482215, PubMed:17079684, PubMed:16407242, PubMed:16407252, PubMed:16940174). Involved in early endosomal interaction with actin filaments and inhibits interaction with microtubules, leading to cell cycle arrest.

Involved in cell division, migration, differentiation, and phagocytosis of apoptotic cells (efferocytosis). Ligand binding to the protein is essential for translation competence by allowing 80S ribosome assembly and facilitating EIF6 recruitment.

Induced by Kaposi's sarcoma-associated herpesvirus, possibly through GAS6 binding to phosphatidyl-serine at the surface of virion envelope. The protein is a member of the RelB family. RelB is a homo- or heterodimeric complex formed by the Rel-like domain-containing proteins FcγRIIb and RelB.

Involved in mediating local tissue responses to inflammatory conditions, as well as in modulating the signaling pathways involved in proteasomal degradation. Involved in the clearance of proteolytic fragments generated by caspases.

Induced by Kaposi's sarcoma-associated herpesvirus, possibly through GAS6 binding to phosphatidyl-serine at the surface of virion envelope. The protein is a member of the RelB family. RelB is a homo- or heterodimeric complex formed by the Rel-like domain-containing proteins FcγRIIb and RelB.

Involved in signaling activation (PubMed:23776175). Regulates TRAF6 and MAP3K7 ubiquitination (PubMed:23776175). Involved in the regulation of cell membrane integrity and cell membrane disruption by mechanical stress (By similarity).

Involved in the regulation of cell membrane integrity and cell membrane disruption by mechanical stress (By similarity). Involved in the regulation of cell membrane integrity and cell membrane disruption by mechanical stress (By similarity).

Involved in the regulation of cell membrane integrity and cell membrane disruption by mechanical stress (By similarity). Involved in the regulation of cell membrane integrity and cell membrane disruption by mechanical stress (By similarity). Involved in the regulation of cell membrane integrity and cell membrane disruption by mechanical stress (By similarity).



flux and proliferation during the reactivation of naive T-cells (PubMed:17157250, PubMed:18792000) which is activated by double-stranded RNA, a sign of viral infection. Acts via the adapter TRIL required for the delivery of cargo proteins to all compartments of the Golgi stack independent of (PubMed:21398697, PubMed:27929370, PubMed:29899144). Has higher activity in LPL inactivating

agents and regulate cell spreading through activation of the effector TNIK. May regulate membrane proteins (PubMed:2010]

higher oligomers of 2'-5'-oligoadenylates (2-5A) from ATP which then bind to the inactive monomeric protein to promote transcriptional activation. Positively regulates TGF-beta signaling through its association with the SMAD proteins. May regulate gene expression. Synthesizes preferentially dimers of 2'-5'-oligoadenylates (2-5A) from ATP which

are involved in transcription. May thereby play an important role in establishing distinct coactivator complexes and

regulating gene expression. The presence of plakoglobin in both the desmosomes and in the intermediate junctions suggests

that this ciliogenic function is mediated in part by the Rab8 GDP/GTP exchange factor, which

is involved in the transition from proliferating neural stem/progenitor cells to postmitotic cells

and become committed to their adult state. The transition from proliferating neural stem/progenitor cells to postmitotic cells is mediated in part by the Rab8 GDP/GTP exchange factor, which

regulates the degradation of damaged proteins inside mitochondria by promoting the accumulation in the matrix of RB1 allows dissociation of the transcription factor E2F from the RB/E2F complex and the subsequent transcription of p130<sup>INK4</sup>. The protein contains a zinc finger domain, a disintegrin-like domain, and a thrombospondin type 1 (TS) motif. Individual members of the family are involved in the overall conversion of 2-oxoglutarate to succinyl-CoA and CO<sub>2</sub> (PubMed:24495017). TRAF3 is involved in DDIT3/CHOP-dependent cell death during ER stress (PubMed:15781252, PubMed:15781253). TRAF3 regulates ATP availability from mitochondria through regulation of mitochondrial membrane ATP synthase (PubMed:28594398).

is involved in transcription. May thereby play an important role in establishing distinct coactivator complexes and

regulating gene expression. The presence of plakoglobin in both the desmosomes and in the intermediate junctions suggests that this ciliogenic function is mediated in part by the Rab8 GDP/GTP exchange factor, which is involved in the transition from proliferating neural stem/progenitor cells to postmitotic cells. The transition from proliferating neural stem/progenitor cells to postmitotic cells is mediated in part by the Rab8 GDP/GTP exchange factor, which

collagen, collagen C-propeptides, fibronectin and E-cadherin. It recognizes the proline-hydroxyl

independent manner and hence may participate in the adhesion, formation of invadopodia and matrix endosomes through interactions with the actin cytoskeleton.

such as EA2, Muc5AC, Muc1a, Muc1b and Muc7.

cell junction assembly, signal transduction, cell proliferation, synaptogenesis and lymphocyte acti

regulates clathrin-mediated endocytosis of synaptic vesicles and mediates exit from early endosome to somal-to-cytosol antigen trafficking. Plays also a role in B-cell survival through regulation of autophagy. Involved in mitochondrial quality control via its interaction with SPATA18/MIEAP: in response to

regulation, DNA repair, DNA replication and chromosomal stability. DNA accessibility is regulated

and for maturation of both mitochondrial and cytoplasmic [2Fe-2S] and [4Fe-4S] proteins (PubMed:10764818, PubMed:8769125). Acts as a transcriptional repressor of HBV and hepatitis B virus (HBV).

de 3-kinase) pathways (PubMed:8723348, PubMed:10764818, PubMed:8769125). Able also to inhibit protein synthesis through the degradation of rRNA, induction of apoptosis, and cell migration. May be involved in cell migration and bone development (By similarity).

thereby contributes to the regulation of endocannabinoid signaling, nociception and perception of pain. In the first step, molybdopterin is adenylated. Subsequently, molybdate is incorporated into the active site of the enzyme. Involved in DNA repair, DNA replication and chromosomal stability. DNA accessibility is regulated in an independent manner.

specifically via disulfide bonds with the Latency-associated peptide (LAP), which is the regulatory subunit of the proteasome. May be involved in endosome fusion.

CASP3, perforates cell membrane and thereby induces pyroptosis. After cleavage, moves to the nucleus

normal skeleton formation during embryonic development, especially for normal development of t

e in BTK-related cytoplasmic signaling in B-cells. May be involved in BCR-induced apoptotic ce  
damaged proteins, which could impair cellular functions, and by removing proteins whose func  
transfers sulfate to the unsulfated polymer. The sulfotransferase activity on sialyl LacNAc stru

ed in the ATP-dependent degradation of ubiquitinated proteins. This complex plays a key role i

round state. Inhibits RAC1-dependent lamellipodia formation. May also play a role in transcripti

TP-dependent proteolytic activity. This subunit is involved in antigen processing to generate cla

l). Important for the internalization of GLUT4. Required for fusion of myoblasts to skeletal musc

d also the zwitterionic cephalosporin, cephalexin and cephadrin. Seems to also play a role in th

promoter region of many genes that are regulated by TGF-beta and, on formation of the SMAD3/5  
lates PTK2B/PYK2 and myosin light-chains. Involved in the inflammatory response (e.g. apopto

lar lipid homeostasis. Involved in the plasma clearance of chylomicron remnants and activated

triction factor, also acts as a pattern recognition receptor that activates innate immune signalin

ecules of LPL.

nilarity).

novel autoregulatory feedback loop (DEC loop) which differs from the one formed by the PER1 and for immature hematopoietic stem cell subsets. Belongs to the tetraspanin web involved in A and C are present in equal amounts in the lamina of mammals. Plays an important role in expression down-regulation observed in tumor cells, suggests that it may function as a tumor suppressor. It forms of cell junctions and recruits PARD3 (PubMed:11489913). The association of the PARD6 with PARD3 thereby preventing tight junction assembly. The PARD6-PARD3 complex links GTP-bound RhoA of RB1 allows dissociation of the transcription factor E2F from the RB/E2F complex and the subsequent

C-terminal region. The gene is expressed in normal stomach and testis, as well as in gastric, RBPJ-mediated repression of transcription.

regulation, DNA repair, DNA replication and chromosomal stability. DNA accessibility is regulated

subject to tissue-specific and developmentally regulated alternative splicing. Specifically activates

Binds preferentially to the 5'-[AU]UAAA-3' motif in vitro. Binds optimally to RNA containing 5'-[AUG]p.

skeleton. May play a role in endocytosis.

target cells of infection and the initiation of reverse transcription, it can induce the conversion of regulatory element binding proteins (SREBPs). Can also promote apoptosis. Upon inflammasome activation, peptide. Nascent MHC class I molecules associate with TAP via tapasin. Inhibited by the covalent

feration and cell differentiation.

g mTORC1 substrates. mTORC1 is activated in response to growth factors or amino acids. Growth factor interaction with ROBO1, increases the interaction of SRGAP1 with ROBO1 and inactivates C

PubMed:8849450, PubMed:8929542, PubMed:9427609, PubMed:10074122, PubMed:10756055. 6-Asp-I-Gly-217' bond. Overexpression promotes programmed cell death.

n particle (SRP), which normally targets nascent secretory peptides to the ER. May also reduce through structurally the encoded protein is more like a type II hair keratin. This protein is involved in (PubMed:1045166).

to injury that includes DNA damage, NEK1 phosphorylates VDAC1 to limit mitochondrial cell death. Lipid efflux is ALB-dependent (PubMed:16702602). Is an active component of the macrophage

is referred to as forward signaling while the signaling pathway downstream of the ephrin ligand system. May play a role in the asymmetric division of fibroblasts and participate in the process

transcription of genes encoding cell-cycle inhibitors, such as p21/CDKN1A (PubMed:21767813). In culture. The presence of FG-GAP motifs and an RGD integrin-binding motif suggests that thi

form 4 have different affinities for different nuclear receptors. Involved in the regulation BCL6-

s and allows them to influence estrogen receptors-alpha signaling.

sin exerts cell-scattering activity toward a wide variety of cells, including epithelial, endothelial,

ersion of prion protein PRPN(C) to PRNP(Sc) via associating (via the heparan sulfate side chain) induce the phosphorylation of LATS1 and LATS2 and can probably function in the regulation of . Recognize peptide-major histocompatibility (MH) (pMH) complexes that are displayed by anti-

ants in germline transformation experiments. May participate in the transport of mitochondria a

d in the cytoplasm during stress or infection. These proteases are important in killing microbes

f USP4 and IKBKB but also for its self-ubiquitination. Component of cullin-RING-based SCF (S

lendrites in Purkinje cells, and may regulate its activity-dependent translation. With ELAVL1, bi

TPase activity (PubMed:17157868). Component of the NuA4 histone acetyltransferase complex. Presence of the anagen (growth) state (By similarity). Modulates the function of TNF-alpha in the

r with KRT8, is involved in interleukin-6 (IL-6)-mediated barrier protection.

selectively binds inositol-4,5-bisphosphate, inositol-3,4,5-trisphosphate and inositol-1,3,4,5-tetra-

its (nucleation) as well as sever filaments already formed. Plays a role in ciliogenesis.

and to involve an effect on nAChR trafficking and its cell surface expression, and on single chain protein kinase A-anchoring protein (AKAP). May act as a scaffolding protein that links PKA to cor

response to BMP2 leading to activate transcription of BMP target genes. Acts as a transcription contraction. Does not form homofilaments nor heterofilaments with other IF proteins.

s peroxisomal beta-oxidation pathway. Optimal isomerase for 2,5 double bonds into 3,5 form is site-bound peptidyl-tRNA and P-site-bound deacylated tRNA move to the P and E sites, respectively (PubMed:7344214, PubMed:18242580, PubMed:23084476, PubMed:31462771). Once activated, recruits HIV-1 p6- and p9-dependent virus release. Probable core component of the endosomal sorting

ulfide or cyanide (in vitro) (PubMed:22852582). It is believed the in vivo electron acceptor is glutathione. Oxidation ability activated by UBA6. Promotes the expression of the proteasome subunit beta type-9 (PubMed:7973638). Binding to Eph receptors residing on adjacent cells leads to contact-dependent bidirectional

presentation. Enhances phosphorylation of CD79A, possibly by recruiting kinases which phosphorylate

back to the cell membrane (PubMed:29030480). [Isoform 2]: Guanine nucleotide exchange factor

is a transcriptional regulator for numerous genes, including some genes involved in cancer progression

enzyme that stimulate the ATP-dependent activity (By similarity).

provided by RefSeq, Apr 2017]

accessibility of target mRNAs. Sequence-specific RNA-binding factor that binds specifically to poly(A) tails, but also binds to a lesser extent for lysophosphatidylethanolamine (lyso-PE). Does not display glycerophosphatidylethanolamine (PE) specificity. Does not display glycerophosphatidylethanolamine (PE) specificity.

atory chain. F-type ATPases consist of two structural domains, F(1) - containing the extramembrane

NA polymerase II as part of capped and polyadenylated primary transcripts (pri-miRNAs) that c  
isfolded glycoproteins into the cytosol where they are ubiquitinated and degraded by the prote:

rgeting to the cell membrane and synapses and modulates their gating properties by slowing th  
], Dec 2017]

ons mediating its different effects. Acts by binding (via its C-terminal domain) to sequences rela  
locus transcription regulation by being recruited by NFE2 (PubMed:17707229). Plays an impor

1' of NDUFS7 (PubMed:27226634). May also have methyltransferase activity (Probable).

intracellular junctions. This protein contains a conserved sequence, called the SH3 (src homo  
nbrane and may be directly involved in trafficking to lysosomes. In concert with the BLOC-1 cor  
NA polymerase II as part of capped and polyadenylated primary transcripts (pri-miRNAs) that c

primary miRNA transcripts (pri-miRNAs) to release precursor miRNA (pre-miRNA) in the nucleu  
CCL5/RANTES, may play a role in neuron survival through activation of a downstream signalir

/or near replication origins and moves along DNA with the replication fork (By similarity). Has 3  
;CN8A fast inactivation.

), PubMed:31542297). Specifically mediates deacetylation of histone H3 at 'Lys-18' (H3K18Ac)  
or regulating the expression of genes involved in immune and inflammatory responses (PubMe

ut its expression is lost in multiple cancer cell lines of various tissue origins. It inhibits tumor ce  
ies, changing chromatin structure by altering DNA-histone contacts within a nucleosome in an  
olic Fe-S biogenesis. Transfers electrons from NADPH to the Fe/S cluster of CIAPIN1.

endent CDKN1A expression.

mediates heterophilic synaptic cell-cell contact and postsynaptic specialization. Receptor proba

ypes of genes. Recruits TBP and BRF2 to the U6 snRNA TATA box.

patched of smoothened (SMO). Required for the accumulation of KIF7, GLI2 and GLI3 in the c

λ which is thought to be transferred to the NXF1-NXT1 heterodimer for export (TAP/NXF1 path  
teins.

05). Upon DNA-binding, it locally modifies DNA conformation by wrapping the DNA around itse  
oth am and pamp inhibit aldosterone secretion by direct adrenal actions. In pituitary gland, both  
ytes by inactivating RAB32 and RAB38. Inhibits RAB32 and RAB38 activation both directly by p

ulation of cardiac muscle contraction through modulation of L-type calcium currents. Is a recept  
tegrity and trafficking, cell survival through NF-kappa-B activation, cell migration, cell differentia

ferentiation. It may act a molecular sponge for microRNAs. Alternatively spliced transcript varia

in the BRCA1-BRCA2-dependent HR pathway. Upon DNA damage, BCDX2 acts downstream  
the BRCA1-BRCA2-dependent HR pathway. Upon DNA damage, CX3 acts downstream of R/  
osome (APC/C), a cell cycle-regulated ubiquitin ligase that controls progression through mitosis

initiation step of the glycylation reaction by adding a single glycine chain to generate monoglyc

ly. It also is required for ATP-dependent interactions of both U1 and U2 snRNPs with pre-mRN.

duced suppression of cell proliferation. Binds specifically to the 3'-untranslated regions (3'-UT  
5'. Specifically phosphorylates and inactivates cyclin B1-complexed CDK1 reaching a maximur

biosynthesis of isoprenoids and sterol synthesis.

adian rhythms in gene expression, which are translated into rhythms in metabolism and behavi

ecycling of proteins to the correct membrane domains. The tripartite complex composed of LIN7  
ction in pre-mRNA splicing, plays also a role in the regulation of translation. Isoform 5 has a rec



0). PcG PRC1 complex acts via chromatin remodeling and modification of histones; it mediates

s and pituitary gland (By similarity). In the ovary, it mediates the effects of Phoenixin-14 and Pfr of cell proliferation. However, an alternative transcript produced at this locus was also found t

.||Endoribonuclease involved in various biological functions such as cellular inflammatory respo

è CENPA-CAD (nucleosome distal) complex and may be involved in incorporation of newly syn NA polymerase II as part of capped and polyadenylated primary transcripts (pri-miRNAs) that c

anisms that enable SR proteins to control RNA splicing and can cause redistribution of SR pro NA polymerase II as part of capped and polyadenylated primary transcripts (pri-miRNAs) that c

o mono-, di- and trimethylate 'Lys-27' of histone H3 to form H3K27me1, H3K27me2 and H3K26297806). Acts as a molecular scaffold facilitating the interaction of PLK4 and CENPJ, 2 mol NA polymerase II as part of capped and polyadenylated primary transcripts (pri-miRNAs) that c

ole myosin IIa, positively regulates actin stress fibers assembly and stabilizes focal adhesions.

1/MASH1 and TCF3/E47, allowing ASCL1 and TCF3 to up-regulate transcription in its presenc 1/MASH1 and TCF3/E47, allowing ASCL1 and TCF3 to up-regulate transcription in its presenc 65-p50 heterodimer and the NF-kappa-B p50-p50 homodimer. Seems also to activate NF-kapp -20' (H4K20me3) and thus regulates transcription and maintenance of genome integrity (PubM

ematogenesis during sexual maturation (By similarity).

sequent hydrolysis of the triphosphate.

i cis double bond at the delta-9 position into fatty acyl-CoA substrates including palmitoyl-CoA ;

156, PubMed:26114596). Also involved in drug metabolism, as it can metabolize eldecalcitol (E  
ding sequence (CSBS), at nuclear matrix- or scaffold-associated regions. Thought to recognize  
omplex II, CII), ubiquinol-cytochrome c oxidoreductase (cytochrome b-c1 complex, complex III,  
itiated multiciliated cells (G1/0) and not in S phase. Essential for centriole amplification and is r  
ulates tumor suppressor genes such as tumor protein p53. Expression of this locus may be a r  
adian rhythms in gene expression, which are translated into rhythms in metabolism and behavi  
extracellular stimuli such as proinflammatory cytokines or physical stress leading to direct activ  
m the TOM complex to the sorting and assembly machinery (SAM complex) of the outer membr  
d probably in a pathway involved in stress response and maintenance of cell wall integrity. Fun  
adian rhythms in gene expression, which are translated into rhythms in metabolism and behavi  
ancement of GR transactivation. Involved in TNF-alpha-induced activation of NF-kappa-B via  
e and very low activity, if any, toward N(1)-acetylspermidine (PubMed:28516954). Histone deac  
opressor CATR sequence of the COX5B promoter (By similarity). Binds with high affinity to RN  
is is increased in proliferating tissues, including certain tumors such as colorectal adenomas ar  
endent on the rate of association of SL1/TIF-IB with the rDNA promoter. SL1/TIF-IB is involved  
ssion of TP53 transactivation and apoptotic functions.  
mediated tumorigenesis. May play a role as transcriptional regulator.  
,5-bisphosphate (PtdIns(3,5)P2) (PubMed:10764818) (By similarity). Specific for lipid substrate  
ia the non-canonical pathway. Could act in a receptor-selective manner.  
of DNA is wrapped in repeating units, called nucleosomes. The linker histone, H1, interacts wit  
quired for the activity of a PDX1:PBX1b:MEIS2b complex in pancreatic acinar cells involved in t  
l) genes on the short arm of chromosome 16. A duplicate read-through locus also exists betwe  
atory chain. F-type ATPases consist of two structural domains, F(1) - containing the extramembr  
semble the pre-replication complex necessary to initiate DNA replication. Does not bind histor  
RK1/ERK2 signaling.

of downstream tyrosine phosphorylation events and activation of PLCG2 (PubMed:16174766, NA polymerase II as part of capped and polyadenylated primary transcripts (pri-miRNAs) that c during endosome sorting. Involved in endocytic trafficking of EGF. Involved in transferrin recep recognition of antigen by T cell antigen receptor (TCR). May also regulate TCR-induced negat ction, interfering with ATAD3A interaction with matrix nucleoid complexes.

the insulin receptor (INSR). Involved in the MET/HGF-signaling pathway (PubMed:29408807). thin the heterodimeric GABA receptor, only GABBR1 seems to bind agonists, while GABBR2 n

re nucleus. Could be involved in the hypothalamic regulation of body weight (By similarity). Cor

carboxylation activity toward glutamate.

NA polymerase II as part of capped and polyadenylated primary transcripts (pri-miRNAs) that c

tochore microtubule attachments (PubMed:23891108).

991, PubMed:8702602, PubMed:9425121, PubMed:10358058, PubMed:14709560, PubMed:1

(PubMed:23161870). May be involved in regulating rapid P4 signaling in the nervous system ( sels and transports LPC into the brain (By similarity). Transport of LPC is essential because it c 2016]

ip system are located on the gene product, which is glycosylphosphatidylinositol-anchored to t

dependent on the rate of association of SL1/TIF-IB with the rDNA promoter. SL1/TIF-IB is involved in DNA replication. Modulates the RAD9A interaction with BCL2 and thereby induces DNA damage-induced transcription of MMP1, MMP13, MMP14, MMP19 and ERP29 (PubMed:25171405). Probably plays a role in platelet activation (H2AZK8me1) (PubMed:23324626). Required for the maintenance of embryonic stem cell self-renewal.

circadian rhythms in gene expression, which are translated into rhythms in metabolism and behavior. Increases CO1 mRNA translation and increases mitochondrial complex IV assembly and activity (PubMed:15111111). Increases expression of E-cadherin/CDH1, N-cadherin/CDH2 and R-cadherin/CDH4 on target cells. Interacts with INPP5D/SHIP1. May modulate ABL1 function (By similarity).

and PKD2 are required for channel activity (PubMed:27214281). Involved in renal tubulogenesis. Interacts with RHOA, leading to its degradation by the proteasome (PubMed:19782033) Degradation of RHOA

(PubMed:30506946).

is a candidate for nonsense-mediated mRNA decay (NMD), and is therefore unlikely to produce a protein. Interacts with GTP1 ligands, such as PSAP. Increases cellular levels of GTP-bound ARF6.

is a ribosomal protein that is a component of the 40S subunit. The protein belongs to the S28E

family. Increases intracellular calcium concentration and nitric oxide production leading to regulation of vascular tone. Acts as a lipid-binding chaperone with specificity for a diverse subset of myristoylated proteins. Specific

structure of the encoded transcript mimics glucocorticoid response element (GRE) which mediates

transcript can also act post-transcriptionally to regulate the stability of mRNAs during the innate

is an ATP-dependent DNA helicase that participates in various functions in genomic stability, including

is also in the presence of supercoiled DNA. Can induce apoptosis in a p53/TP53 dependent manner

coactivators including isoform 1, NCOA6 and CITED1 (PubMed:11443112). Regulates centriole

of oxo-acids as amino-group acceptors, with a preference for 2-oxoglutarate, 2-oxocaproic aci

atory chain. F-type ATPases consist of two structural domains, F(1) - containing the extramembr

ruitment of EYA3 to the SIX1-DACH1 complex. Transcriptional activation seems also to involv

NA polymerase II as part of capped and polyadenylated primary transcripts (pri-miRNAs) that c

complex that has guanine nucleotide exchange factor (GEF) activity and regulates autophagy  
g neural development a switch from a stem/progenitor to a post-mitotic chromatin remodeling m

of asymmetric distribution of phospholipids. Phospholipid translocation seems also to be implic

TTCTGGGAAGA-3' of the acute phase response element (APRE). Transactivates several pro

NA polymerase II as part of capped and polyadenylated primary transcripts (pri-miRNAs) that c

provided by RefSeq, Aug 2013]

NA polymerase II as part of capped and polyadenylated primary transcripts (pri-miRNAs) that c

NA polymerase II as part of capped and polyadenylated primary transcripts (pri-miRNAs) that c

e for the Fanconi anemia complex by associating with E3 ubiquitin-protein ligase FANCL and c

ion of pancreatic genes involved in insulin secretion. Regulates the expression of the glucose t

expansion within the human lineage and has expanded, to a lesser extent, among primates in

15301, PubMed:15041462, PubMed:18577768, PubMed:19965576, PubMed:20972997, PubM

:28827538).

NA polymerase II as part of capped and polyadenylated primary transcripts (pri-miRNAs) that c

plasma membrane. The channel is permeable to a range of divalent cations including calcium,  
pe and the expression of muscle-specific genes. May also phosphorylate PPP1R12A and inhibi  
nation of 'Lys-11'-linked polyubiquitin chains, a specific ubiquitin-linkage type mediated by the *A*

all GTPases. May enhance the guanine nucleotide exchange factor (GEF) activity of DOCK1 (l

ase of the cell cycle (PubMed:9635433, PubMed:14993212, PubMed:24064211). Its destruction

NA polymerase II as part of capped and polyadenylated primary transcripts (pri-miRNAs) that c  
ess through mitosis and normal cytokinesis. Does not dephosphorylate phospho-threonines in l

As (snRNAs) (Gu et al., 2005).[supplied by OMIM, Mar 2008]

tor subunits and shaker-type potassium channels. Required for synaptic plasticity associated with  
position. In parallel, may have a minor phospholipase 2 activity acting on acyl groups in position  
scription factors, such as MSX2, FAST2, SMAD2 and SMAD3 during hematopoietic cell differentiation

NA polymerase II as part of capped and polyadenylated primary transcripts (pri-miRNAs) that circulate

rotein-dsDNA filaments (By similarity). May play also an essential role in telomere length maintenance

may play a role in rRNA maturation. This gene is co-transcribed with the ribosomal protein L39 and  
AD to complete this process. The protein encoded by this gene is an inhibitor of ERAD, function

H(2)S metabolism performed by the sulfide:quinone oxidoreductase (SQOR) which catalyzes

ng activity, can protect cells from oxidative stress by reducing caspase 3 activity during apoptosis. [provided by RefSeq, May 2015]

ability and bipolar disorder in human patients. [provided by RefSeq, Sep 2016]

: component of the SMC5-SMC6 complex, a complex involved in repair of DNA double-strand breaks.

helial cells (By similarity).

NA polymerase II (pol II). May be a candidate proto-oncogene in head and neck squamous cell carcinoma.

both an H/ACA box and a C/D box, and is thought to guide the pseudouridylation of residue U47 in the H/ACA box.

RNPs) involved in pre-rRNA processing and modification. snoRNAs of the box C/D class, like S47, are associated with the H/ACA box.

s of the 5'-AGGTCA-3' motif. Represses transcriptional activity of LHCG.

ought to function in cell-cell recognition and adhesion. Alternative splicing yields isoforms with unique functions.



y promoting FAK tyrosine phosphorylation and stress fiber turnover.

Asn-X-Ser/Thr consensus motif in nascent polypeptide chains, the first step in protein N-glycosylation is catalyzed by RNA polymerase II as part of capped and polyadenylated primary transcripts (pri-miRNAs) that are processed by RNA polymerase II as part of capped and polyadenylated primary transcripts (pri-miRNAs) that are processed by the protein complex (severin), these proteins do not sever actin filaments.

These proteins contain C-terminal cysteines. Most LY6 proteins are attached to the cell surface by a glycosylphosphatidylinositol anchor. LY6 proteins inhibit protein kinase activity and preventing phosphorylation of GIL proteins (GLI1, GLI2 and/or GLI3).

LY6 is associated with early-onset mitochondrial encephalopathies. Alternative splicing of this gene results in two isoforms.

LY6 is a protein complex that regulates promoter activation by orchestrating a calcium-dependent release of calcium from the endoplasmic reticulum.

LY6 is thought to promote neural progenitor self-renewal, possibly by down-regulating neuronal differentiation through a mechanism (PubMed:25320081). Also transports guanine but not adenine (deoxy)nucleotides (dGTP) and is involved in the activation of Rho GTPases including RHOA, CDC42 and RAC1 (PubMed:27917469).

LY6 uses oleoyl-CoA as the acyl donor. Lysophospholipid acyltransferases (LPLATs) catalyze the reaction of oleoyl-CoA with lysophospholipids to form phospholipids and promote the assembly and/or stability of the NHEJ machinery.

and BMP10. Involved in the regulation of nociception, acting as a modulator of the interaction between BMP and BMP) by regulating expression of genes required for the oogenic programs, which are repressed in DNA replication. The DRTF1/E2F complex functions in the control of cell-cycle progression for CSFIR) demonstrate its ability to promote growth and specifically neurite outgrowth, and cell surface the activity of L-type calcium channels that contain CACNA1C as pore-forming subunit and in

promoting APC-FZR1 dependent degradation of mitotic cyclins and subsequent exit from mitosis. cell-mesenchymal interactions during the formation of the mammary glands and teeth. Required for

as X inactivation in females. This gene does not make a protein.[provided by RefSeq, May 2016]

has been found for this gene, however, the full-length nature of some variants is not known. [provided by RefSeq, May 2016]

complex II, CII), ubiquinol-cytochrome c oxidoreductase (cytochrome b-c1 complex, complex III, the development of human prostate cancer, from prostatic intraepithelial neoplasia to invasive

development. Required for osteoblast differentiation and sonic hedgehog/SHH signaling response. Exhibits complex activity.

is instead stabilized by a 3' triple helical structure. This transcript is retained in the nucleus when

heteric guanine nucleotide-binding protein (G protein) (PubMed:18045877). Involved in the regulation

induced by B lymphocytes. In the recognition phase of humoral immunity, the membrane-bound immunoglobulin heavy chain proteins mediate signal transduction events that play a role in the regulation of cell development of the receptor is referred to as forward signaling while the signaling pathway downstream of the receptor (1), rather than under standard conditions. Acts as a sensor involved in energy homeostasis: regulation of 1 acts as a motor for the intracellular retrograde motility of vesicles and organelles along microtubules

ly regulate cell division. [provided by RefSeq, May 2016]

ion in neurons and neurite outgrowth (By similarity). Maintains also meiotic arrest in oocytes (B  
phatidylcholines on the surface of high and low density lipoproteins (HDLs and LDLs) (PubMed:

he elongating chondroitin polymer. Specific activity is much reduced compared to CHSY1.

DNA replication by promoting homologous recombination-mediated repair of replication fork-ass  
of the cell cycle, which may potentiate cells for Wnt signaling (PubMed:27821587). May regula

elongation factor B (P-TEFB), which is proposed to facilitate the transition from abortive to proc  
cts then as a sliding clamp platform on DNA for several proteins involved in long-patch base ex

tin-protein ligase complex which mediates the ubiquitination and subsequent proteasomal degr  
ow a 30-fold higher chemotactic activity.

oRNPs) involved in pre-rRNA processing and modification. snoRNAs of the box C/D class, like  
plex is required to target membrane protein cargos into vesicles assembled at cell bodies for de  
nd-dependent transcriptional activation by nuclear hormone receptors (PubMed:12215545, Pub  
on gene 3 protein: Inhibitory receptor on antigen activated T-cells (PubMed:7805750, PubMed:

te and lysophosphatidate (PubMed:17590538). Phospholipid phosphatases are involved in bot  
ome 3. This gene acts as a tumor suppressor, and plays a role in regulating the migration of tur  
||Apical membrane anion-exchanger with wide epithelial distribution that plays a role as a comp

nction of NK cells (PubMed:8421688).

activates a signaling cascade that leads to increased PPARA activity, and ultimately to increas

in the assembly of focal adhesion (PubMed:15004028).

ort signal. These 2 signals seem absent in EBLN-2 supporting an unrelated function in Human.

phosphorylation. Plays a critical role regulating PDPK1 membrane translocation in response to neuronal, vascular and epithelial development. Binds promiscuously Eph receptors residing on a

similarity).||Regulates APAF1 expression and plays an important role in the regulation of stress-

NA polymerase II as part of capped and polyadenylated primary transcripts (pri-miRNAs) that c

by CREB3 and reduces the amount of CREB3 in the cell. Able to down-regulate expression of peptide FF potentiates and sensitizes ASIC1 and ASIC3 channels.

ed in the regulation of exocytosis.

of the bacteria to lung cell lines. Reduction of levels of KRT10 keratin decrease adherence, over antigen-presenting cells and the T-lymphocyte rosetting with erythrocytes. In addition, the LFA-3/ accelerates the intrinsic rate of GTP hydrolysis of RAC1 or CDC42, leading to down-regulation o

adenosine, and so contributes indirectly to cellular signaling events. Acts as a positive regulator and appear to be involved in cargo selection and vesicle formation. AP-2 is involved in clathrin-coated vesicles as well Human cytomegalovirus (HCMV) infection.||Broad specificity aminopeptidase which plays

gamma-tubulin redistribution (By similarity).

ine metabolism is a critical regulator of innate and adaptive immune responses. Seems to be i

gene is located within a cluster of similar arylsulfatase genes on chromosome X. A related pse

ner with MAF, represses the transcription of genes under the control of the NFE2L2 oxidative stress response in the mammary epithelial cell line HC11 (By similarity).

ls and negatively regulates gene expression of proteins that promote the egress of tissue-resident cells. Participates in signal transduction stimulated by growth factor receptors, cytokine receptors, and apoptosis in a BAX- and BAK1-dependent manner or in a BAX- and BAK1-independent manner. Inhibits protein synthesis (PubMed:25106868, PubMed:14981510). Acts as a 3'-untranslated region (UTR)

which increases the stabilization of actin filament structure. In muscle tissues, inhibits the acton

or nuclear structures through potential interactions with actin. May bind DNA. Cytically cleaves CPEB3 following neuronal stimulation which abolishes CPEB3 translational repression. SREBP1 is a transcription factor that binds to sterol regulatory element binding proteins (SREBPs) between the basic helix-loop-helix leucine zipper motifs (CAVIN1/2/3/4) to the caveolae (PubMed:19262564). Interacts directly with G-protein associated glycosylated proteins, allowing stem cells to bind to lectins expressed by stromal cells or other marrow cells. Hydrolyzes ATP and ADP equally well.

6). Participates thereby in a wide variety of cellular functions including the activation, recirculation, and presentation of antigenic peptides by the invariant chain (Ii) complex until its release by HLA-DM in the endosome. Plays a critical role in MHC class II antigen presentation.

is a regulator of neural stem cells quiescence by mediating anchorage of neural stem cells to extracellular matrix (PubMed:21269602). This cadherin may play an important role in endothelial cell biology through its interaction with integrins. It is a negative regulator of neural cell growth.

is produced by lysosomal proteinases (PubMed:11054422, PubMed:19038966, PubMed:19038967).

of insulin. Type V collagen is a key determinant in the assembly of tissue-specific matrices (By similarity).

5'-ATN(9)CCAC[GA]-3' when NF-Y is bound to ERSE.

of proinflammatory chemokines, and thereby plays an important role in innate immunity and in inflammation.

of cross-linked TG/thyroglobulin in the thyroid follicle lumen (By similarity). Has also been implicated in the regulation of extracellular matrix degradation. Involved in the release of thyroid hormone thyroxine (T4) by limited proteolysis.

on molecule and is essential for tight junction integrity. Also involved in transepithelial migration (PubMed:237, PubMed:26997266, PubMed:27591049, PubMed:29291351, PubMed:18313383). Plays a role in type I (caspase-dependent) apoptotic and type II (caspase-independent) autophagic cell death signaling, and is a 5'-5' triphosphate-dependent RNA helicase, able to unwind both RNA-RNA and RNA-DNA duplexes. Possesses a conserved nuclear localization signal.

ty toward phosphotyrosine, phosphoserine and phosphothreonine residues.

able of mediating S1P-induced cell proliferation and suppression of apoptosis.

protein kinase A (PKA). Binds to the erythrocyte membrane glucose transporter-1 SLC2A1/GLUT1. The signaling pathway upstream of the receptor is referred to as forward signaling while the signaling pathway downstream of the receptor is referred to as reverse signaling.

688). Required for the function of REG3A in regulating keratinocyte proliferation and differentiation-activated protein kinase (MAPK), I-kappaB kinase/NF-kappaB and Rho (PubMed:28445455). Plasma membrane and soluble forms exhibit post-proline cleaving endopeptidase activity, with a major

in of pancreatic beta-cells. Appears to modulate glycerol gluconeogenesis in liver. Important regulator of SMAD2 and SMAD3 with the activin receptor complex, thereby blocking the activin signal. May modulate the cytoskeleton. Interaction with FLNA may allow neuroblast migration from the ventricular zone into the brain. May display structural functions at the Z lines in muscle cells. Critical for normal myogenesis and for embryonic development. Promotes proliferation, survival and migration of endothelial cells, and regulates axon guidance. Inactive FYN is phosphorylated on its C-terminal tail within the catalytic domain.

(PubMed:23084921). Plays a role in Vaccinia virus cell entry by apoptotic mimicry (PubMed:215084921) against different pathogen classes.

Targets to autophagolysosomes, providing broad host protection against different pathogen classes

phosphorylated S-nitryl-glycine, which is hydrolyzed to cysteine and glycine by dipeptidases. In the presence of high concentrations of S-nitryl-glycine, it stimulates the breakdown of ganglioside GM2 and glycolipid GA2 by beta-galactosidase (PubMed:8717357, PubMed:15302677, PubMed:16144831, PubMed:22715885, PubMed:25445488, PubMed:27084452). It stimulates only the breakdown of ganglioside GM2 and glycolipid GA2 by beta-galactosidase (PubMed:12515866, PubMed:16787920, PubMed:16705036, PubMed:23762476, PubMed:27084452). It is involved in transmembrane signaling systems. The G(i) proteins are involved in hormonal regulation of activation, and signaling events leading to their down-regulation. Phosphorylates a variety of GPCR substrates that acts by inhibiting the activity of the ubiquitin-conjugating enzyme UBE2N/Ubc13, thereby

in-C plays an important role in regulating the stability of red cells.

is the predominant thrombin inhibitor in place of antithrombin III (AT-III). Also inhibits chymotrypsin

is also involved in the transcription regulation of genes containing, or in close proximity to A+T-rich regions of condensed chromatin for other proteins through interactions with nucleosomal core histones and therefore

plays its role as co-chaperone. Functions as co-chaperone for HSPA1B and negatively regulates the proliferation of astrocytes. Ligand for integrins alpha-8/beta-1, alpha-9/beta-1, alpha-V/beta-3 and alpha-5/beta-1. Prevents ubiquitination until they associate with regulatory subunits.

(PubMed:78155). In neutrophils, stimulates phagocytosis probably by signaling through the IL15 receptor (IL15RA:ITGB4) is a receptor for laminin in epithelial cells and it plays a critical structural role in the regulation of IL4 and IL7. Constitutively binds to the ISRE promoter to activate IL7. Involved in cell cycle regulation of hepatitis A virus (HAV) and yellow fever virus (YFV) in an exonuclease-dependent manner. May also play a role

lishing action potential waveform and excitability of neuronal and muscle tissues. Inward rectifier

nin-5 is thought to be involved in (1) cell adhesion via integrin alpha-3/beta-1 in focal adhesio

Has high affinity for the Forssman pentasaccharide (PubMed:18005988). Ligand for HAVCR2 (vaccenolate) at carbon 13 to generate (11E,13Z)-octadecadienoate, likely participating in the bi

role in the aortic wall architecture (By similarity).

deamination of trimethylated 'Lys-4' of histone H3 (H3K4me3), a specific tag for epigenetic tra signal transduction from cell adhesion sites to the nucleus allowing successful integration of sig

onal.

obial activity and is able to permeabilize different ions through liposomal membranes.||Lactoferrin repressor SNIP1. May act synergistically with SMAD4 and YY1 in bone morphogenetic protein promoting hematogeneous tumor spread. Could be an adhesion molecule active in neural crest cell muscle development, but also in neuronal differentiation and survival. Plays diverse roles in trafficking to hepatocyte growth factor/HGF ligand. Regulates many physiological processes including

the DNA (PubMed:20159561, PubMed:20471948, PubMed:25417107, PubMed:27105114, PubMed:19714714). Mediates viral Tat protein, leading to a decrease in neuronal Tat's mediated neurotoxicity (PubMed:1

also play a role in neovascularization or angiogenesis. Hydrolyzes collagen type IV, laminin, nidogen

rotein.||Mediates the endocytosis of glycoproteins by macrophages. Binds both sulfated and nonsulfated

for MAX.

dian rhythms in gene expression, which are translated into rhythms in metabolism and behavior

VT3A-mediated signaling (PubMed:25029443, PubMed:27162350). In inner ear, crucial for spiral ganglion cell survival. This ligand-dependent signaling occurs through a G(q)-mediated pathway in melanocytic cells. Involved in gene regulation. Synthesizes higher oligomers of 2'-5'-oligoadenylates (2-5A) from ATP which th

formation and plasticity. Acts as downstream effector of the small GTPases CDC42 and RAC1  
ocrine peptides (PubMed:12699694). Alpha-amidation involves two sequential reactions, both of  
mitochondrion, including the monitoring of local cAMP levels at the outer mitochondrial membra  
ses fat metabolism in response to prolonged fasting, and as adaptation to a high-fat diet. Plays  
0 plays a critical role in TEM and is required for efficient trafficking of PECAM1 to and from the  
of asymmetric distribution of phospholipids. Phospholipid translocation seems also to be implic

2). Cleaves ASARM peptides between Ser and Glu or Asp residues (PubMed:18597632). Reg

of phospholipids between triglyceride-rich lipoproteins themselves (PubMed:7654777, PubMed  
(By similarity). Plays a role in RHOA activation and subsequent changes of the actin cytoskelet

TP-dependent proteolytic activity. This subunit is involved in antigen processing to generate cla  
3867277). Plays a role in disulfide bond formation in a variety of extracellular proteins (PubMec  
lation of SLP76 and LAT and mobilization of Ca(2+).||Isoform 1 plays a critical role in signaling  
seems to affect the substrate specificity of the first one.

osite effects on PTPRS oligomerization and regulation of neurite outgrowth. Contributes to the  
ses, phagocytosis of apoptotic cells and epithelial cell polarization. Augments the production c  
with distinct downstream effectors. Acts as a GTP sensor for GTP-dependent exocytosis of den  
prenylation. Functions in synaptic plasticity by contributing to the induction of long term potenti  
-6-phosphate receptor (M6PR). Also required for protein transport from the Golgi apparatus to

acellular calcium ions (PubMed:9837883, PubMed:10587439). Exhibits a chemotactic activity f

6, PubMed:20068036). The ligand-receptor pair CCL20-CCR6 is responsible for the chemotax  
re and Gram-negative bacteria (90-fold-higher when compared to CXCL5 and CXCL7).

dent and CX3CR1-independent manner. In the presence of CX3CR1, activates integrins by bin  
aces during the initial steps in inflammation. Critical for the initial leukocyte capture.

lar beta-catenin levels (By similarity). Has antiproliferative effects on vascular cells, in vitro and

in the organization of actin filament bundles and the formation of microspikes, membrane ruffle

ich enhances transcriptional activation (By similarity). Involved in the differentiation of naive CE

kinases, G protein-coupled receptors as well as cytokine receptors. Participates in signaling pat



n (PubMed:12711699). Appears to be involved in myosin II assembly. May modulate myosin II

4, MMP-15, MMP-16 and MMP-19.

members may be modulated by association with dominant-negative AES. Essential for the tran  
mTORC1, a signaling complex promoting cell growth in response to growth factors, energy lev

ading to its degradation by the proteasome, thereby regulating the actin cytoskeleton and cell n  
at promotes ubiquitination of target proteins, such as MAP3K14. The TRAF1/TRAF2 complex r  
for normal antibody isotype switching from IgM to IgG. Plays a role T-cell dependent immune re  
pa-B and probably JNK. Seems to be involved in apoptosis. Plays a role in mediating activation  
of influenza A virus NS1 protein.

component of the CTLH E3 ubiquitin-protein ligase complex (PubMed:29911972). In vitro cata  
PubMed:8643456, PubMed:1532799). Glucosylceramide is the core component of glycosphing

he nucleus, endoplasmic reticulum, and mitochondria, either laterally or terminally.

n of Tau phosphorylation (By similarity).

-specific organelle translocations (By similarity).

mal chondrocyte maturation and for normal bone mineralization during embryonic bone develo  
end. A truncated copy of this gene is found on the Y chromosome at the pseudoautosomal bou  
regulation of NF-kappa-B activation and apoptosis. Inhibits NF-kappa-B activation triggered by

ulates transcription of ARNTL/BMAL1, CLOCK and CRY1 by acting as a coactivator for RORA  
Regulates actin cytoskeletal reorganization via phosphorylation of PPP1R12C and MYL9/MLC:  
equent phosphorylation of MAPK1 and MAPK3. Promotes production of proinflammatory cytoki

rcates the paranodal region of the axo-glia junction. In association with contactin involved in th  
lay a role in mitochondrial DNA maintenance. A pseudogene of this gene is located on the sho  
associates with the 40S ribosome and facilitates the recruitment of eIF-1, eIF-1A, eIF-2:GTP:me

osteoblast differentiation and/or osteoblast activity in bone (By similarity).

20, PubMed:11114884, PubMed:22099306, PubMed:27422871). Binds RNA containing 5'-tern  
ty may be modulated by binding to the decoy receptors TNFRSF10C/TRAILR3, TNFRSF10D/T

lytic activation which initiates the subsequent cascade of caspases (aspartate-specific cysteine

e organization of a multimolecular complex that would interface incoming signals to the reorga

ruitment to focal contacts and cell migration.

r modifier of the MAP1 LC3 family (PubMed:16286508, PubMed:20168092, PubMed:24128730)

atic cells.

etrograde trafficking pathway for recycling proteins, such as mannose 6 phosphate receptor (M6PR) to the Golgi apparatus and the cytoskeleton. Induces lamellipodia independent of its GEF activity.

PTN12 and WAS and allow PTPN12 to dephosphorylate WAS. Has the potential to physically co-localize with the ketone bodies acetoacetate, beta-hydroxybutyrate and acetate (By similarity).

al.

al in mitogen-poor environments. Inhibits the SHH and WNT1 pathways, thereby enhancing adhesion.

blast into myofibroblast and myofibroblast amoeboid migration. Increases retinoic-acid regulator 1 (RAR1) and SMAD4 to the vicinity of the receptor complex and facilitate its interaction with receptor-regulated tyrosine kinases.

on events. Suppresses the integrin-induced tyrosine phosphorylation of paxillin (PXN). May play a role in cell adhesion.

omatin reader protein that recognizes and binds histone H3 trimethylated at 'Lys-9', dimethylated histone H3 and within mucin-associated glycans that can ultimately serve as SELL ligands. SELE is a cell surface receptor that binds to SELL ligands.

ors, it aids the coupling of surface receptors to intracellular calcium release. Isoforms can be differentially expressed in response to excitotoxic stress. Cytoplasmic MAPK8IP1 causes inhibition of JNK-regulated activation of transcription factors in Alzheimer disease. Cleaves aggrecan at the '392-Glu-|-Ala-393' site.

AH. Isoform 2 modulates SNCA monoubiquitination by SIAH1.

es. Acts as an organizer protein that allows NOX1- or NOX3-dependent reactive oxygen species to be transported from the late endosomes to the TGN. May also play a role in transport between the Golgi apparatus and the TGN. Binds to and activates small GTPases into their active GTP-bound form (PubMed:12628187, PubMed:1646446)

l by ANK2 to phosphatidylinositol 3-phosphate (PI3P)-positive early endosomes, where it inactivates TRAF2 binding to LMP1 and inhibits LMP1-mediated NF-kappa-B activation. Negatively regulates the expression of BimS. Isoform Bim-gamma induces apoptosis. Isoform Bim-alpha3 induces apoptosis upon activation of the receptor (By similarity). Required for basal and CXCL2 stimulated serine-threonine phosphorylation of IGF1R. May play a role in megakaryocytopoiesis.

PEB3 and recruiting CNOT7 which leads to target mRNA deadenylation and decay (PubMed:200000000).  
lamellipodia formation. The WAVE complex regulates actin filament reorganization via its interaction with the activation cluster TLR2:TLR6:CD14:CD36, this cluster triggers signaling from the cell surface via a MyD88-dependent mechanism. Binds to the complex neuropilin-1/plexin-1.

commonly occur in proteins with high turnover rates. Immunological characteristics of this protein are similar to those of mitofusin proteins (MFN1-2).

regulates platelet activation and/or aggregation (PubMed:14522983, PubMed:15231832, PubMed:176000000) and acts as an adapter protein in signal transduction cascades by binding to SH2 and SH3 domain-containing proteins.

demethylates trimethylated, dimethylated and monomethylated H3 'Lys-4'. Acts as a transcriptional repressor for pathway activation. Mechanistically, interacts with and mediates RABEP2 centrosomal localization.

hydrolyzes acetyl-SH (PubMed:16940157). Acyl-coenzyme A thioesterase 2/ACOT2 displays higher activity toward acylated and transformed cells that are characterized by high levels of phosphorylated metabolites, such as phosphoethanolamine.

signals carried by cAMP (By similarity).

F1. May be involved in translational regulation.

membrane.

involved in the transport of endoplasmic reticulum membrane into vesicles and the selection of cargo molecules (By similarity). May be involved in vesicle trafficking.

regulates mitochondrial motility. Crucial for recruiting OGT to the mitochondrial surface of neuronal projections. May play a role in intercellular adhesion.

involved in the recruitment of the endoplasmic reticulum to endosome tubules for fission (PubMed:302200000). Demethylates H3 'Lys-9', with a weaker activity than KDM4A, KDM4C and KDM4D. Demethylation of Lys-9 is associated with transcriptional activation.

interacts with the TGF-beta receptor ALK1. When overexpressed, induces the formation of cellular aggregates.

heart development.

triglyceride, phosphatidylcholine and phosphatidylethanolamine biosynthesis in the reticulum

causing mitotic arrest (By similarity). It also regulates mitochondrial function by mediating the u

329). Promotes in vitro the ability of TERT to elongate telomeres (PubMed:12676087, PubMed  
ent basal repression machinery in Shh signaling by increasing cAMP levels, leading to promote  
enols. May have a transcriptional activatory activity via its association with alpha-tocopherol. Pr  
ed exons during erythropoiesis (By similarity). RNA-binding protein that seems to act as a core

ose development (By similarity). Binding to class 4 semaphorins promotes downstream activati  
in the migration of cortical neurons during brain development via its interaction with UNC5D. M  
regulate ER Ca(2+) homeostasis (PubMed:16908669). Plays a critical role in oogenesis (PubM

atalyzes N-terminal pyroglutamate formation. In vitro, catalyzes pyroglutamate formation of N-te  
ng cell-associated C-terminal fragment which is later released by gamma-secretase. It has also

02554, PubMed:23601106, PubMed:22056990, PubMed:24336198, PubMed:26294762, PubM  
ponses, such as endothelial cell sprouting and migration in the forebrain and neural tube, and

s differentiation of T helper 1 cells (Th1).

linking these intracellular compartments (PubMed:25447204). The ORP3-VAPA complex stimu  
lic clearance of pathogenic bacteria. Isoform 4 binds the membrane surrounding Salmonella ar

alpha subunits, thereby driving them into their inactive GDP-bound form (PubMed:15096504).

H1.0 promoter is enhanced by interaction with RB1. Disrupts the interaction between DNA and

ertebrate development, where they locally inhibit Wnt regulated processes such as antero-post

neuronal apoptosis, including apoptosis in response to amyloid peptides derived from APP, and a pro-fibrogenic factor contributing to the pathogenesis of renal fibrosis through fibroblast activation. Mitochondrial apoptotic pathway, promotes caspase-8-dependent proteolytic maturation of BID independent of

(PMID:1729611). Also functions as a nucleolar sensor that regulates the activation of p53/TP53 in response to

able of inducing nuclear DNA damage. Displays an increased activity relative to isoform 1. ||Corresponds to

growth or actin cytoskeleton remodeling by binding to both SRC and PIP2. May function as a signaling

GKAP/PSD-95 and Homer, respectively, and the actin-based cytoskeleton. Plays a role in the regulation of

phate (dTMP). Phosphorylated by protein kinase 2 (CK2). Appears to target ATM to the plasma membrane. Appears to also regulate

expression (PubMed:14621294). Regulates SNCA expression in primary cortical neurons (PubMed:14621294).

PubMed:27018888).

temperatures higher than 52 degrees Celsius; is not activated by vanilloids and acidic pH.

the end of mitosis. Plays a role in endocytosis via clathrin-coated pits, but also clathrin-independent

steroids, retinoids, lipids and xenobiotics. [provided by RefSeq, Apr 2016]

activate fatty acids from exogenous sources for the synthesis of triacylglycerol destined for intracellular

; not act as a peptide transferase that transfers GalNAc onto serine or threonine residue on the

Med:30970241). Mediates the formation of endoplasmic reticulum-lipid droplets (ER-LD) containing

of a luminal glucose-6-phosphatase. May not play a role in homeostatic regulation of blood glucose

which has Notch. The gamma-secretase complex is an endoprotease complex that catalyzes the

; by exchanging bound GDP for free GTP.

with CDC42 and Rac to generate additional structures, increasing the diversity of actin-based morphology

C1-TSC2 complex and the GTPase RHEB. Plays an important role in responses to cellular energy

independent degradation (ODD) domains (N-terminal, NODD, and C-terminal, CODD) of HIF1A. Also

By similarity).

phosphatase activity which may control physical membrane displacements associated with vesicle

and maintenance of repressive chromatin configuration, contributing to a subset of the SETDB1

otrophic lateral sclerosis, but studies of other populations have not been able to replicate this  
4YH10 filaments, and the helicase DHX9.

re 3'-UTR of CDKN1A transcripts, leading to maintain the stability of CDKN1A transcripts, there  
ted pathway. Sustains B-cell lymphopoiesis in secondary lymphoid tissues and regulates FCEF

of ether lipids/plasmalogens and wax monoesters which synthesis requires fatty alcohols as si

ce and transcriptionally represses cyclin D1 expression. Regulates telomerase reverse transcrip

n the developing nervous system. Involved in down-regulation of growth, stabilization of wiring

erving as a molecular bridge for the transfer of cholesterol from the PM to the ER (By similarit

n-conjugating enzyme in the form of a thioester and then directly transfer the ubiquitin to target  
ost inactive by itself (PubMed:18082604). Also activates deubiquitinating activity of complexes

ilarity).

5663). Fructoselysine-3 phosphate adducts are unstable and decompose under physiological c  
ngth required for presentation on MHC class I molecules. Preferentially hydrolyzes the basic re  
gger their ubiquitination and proteasome-dependent degradation. In addition, interaction with SI

control, DQC) (PubMed:30190310). FBXL17 specifically recognizes and binds a conserved deg

location of PRKN (PubMed:14607334, PubMed:15087508, PubMed:19229105, PubMed:1996  
PK8, induces actin bundles formation and stabilization, thereby reducing actin plasticity, hence

γ-coupled chloride cotransporters respectively. Activates SCNN1A, SCNN1B, SCNN1D, SGK1,

nt PAK-2p34 kinase activity and changes its localization from the nucleus to the perinuclear re  
cycogen phosphorylase and enhances the rate at which it activates glycogen synthase and there  
ase complex (HDAC) to the nucleolus (PubMed:16820529). Binds DNA, apparently without sec

reventing for instance the specific phosphorylation of PKCs and thereby controlling cell migrati

of MDM2.

for segmental gene expression during hindbrain development.

differentiation (PubMed:16380219).

involved in the development of acute and chronic transplant rejection and in the regulation of lym  
s (By similarity). Also regulates the epithelial-to-mesenchymal transition in other epithelial cells  
aintenance of physiological function of outer hair cells and the protection of hair cells from acou  
ns (Probable).

positive role in the TNFalpha and IL-1beta signaling pathways. Mechanistically, induces the 'ly

al to fulfill cellular energy requirements and preventing excess ROS production. While LC3s are  
endritic cell (DC) migration by locally activating CDC42 at the leading edge membrane of DC (E

ed for the survival of both hematopoietic and endothelial precursors during specification (By sir





ar trafficking of alpha-4:beta-2 and alpha-7-containing nAChRs and may inhibit their expression or IL1B. Involved in postnatal glycogen storage and energy metabolism (By similarity). Inhibits the

olony formation in soft agar (PubMed:25349211).

n a genome-wide association study. Alternative splicing of this gene results in multiple transcrip

7141156). The complex formed with VCP has membrane fusion activity; membrane fusion activity

es at least two forms of creatine kinase, CKB and CKMT1A.

urons, neurite outgrowth and glial cell attachment. May play a key role in intracellular signaling

ays a role in the regulation of cell morphology and cytoskeletal organization.

NK activation (PubMed:22128169). Facilitates TNF-alpha-mediated recruitment of adapter pro

BBP. May be involved in regulation of gene expression during development and differentiation

inositol 1,3,4,5-tetrakisphosphate and then to inositol 1,3,4,5,6-pentakisphosphate (Ins(1,3,4,5,

defined by a 100-110 amino acid SRCR domain, which may mediate protein-protein interaction as a cytosolic activator of BRAF; upon binding to MAP2K1/MEK1, dimerizes with BRAF and promotes Bcr-1 recruitment to the cytoplasm. This protein has been shown to be an effective transporter of the Bcr-1 protein to the cytoplasm. It allows NOX1- or NOX3-dependent reactive oxygen species (ROS) generation and ROS localization (By similarity). Promotes neuronal adhesion (By similarity). May inhibit neurite outgrowth (PubMed:178883). Can inhibit the activity of ANO1 (PubMed:20056604, PubMed:22946059). Sphingosine, and its phosphorylated form sphingosine-1-phosphate are bioactive lipids that me

es. Alternative splicing results in multiple transcript variants encoding different isoforms. [provided by RefSeq, Feb 2017] [Agrin N-terminal 110 kDa subunit]: is involved in regulation of neurite outgrowth pro

autophagy, DNA damage response and apoptosis. Coordinates actin remodeling through tyrosine phosphorylation. The E3 ubiquitin ligase complex is necessary for efficient transferrin receptor recycling but not for EGFR degradation or ubiquitin-mediated metabolism.

Phosphorylates AMP and dAMP using ATP as phosphate donor, but phosphorylates only AMP when using dATP. The mitochondrial and cytosolic forms, can be distinguished by their electrophoretic mobilities, kinetic properties, and s

depolarization-contraction coupling (PubMed:24755653). Is a negative regulator of endocytosis

LDLR degradation, probably reduces PCSK9 protein levels via a translational mechanism but

apoptosis.

ion of APP-beta.

tain. Plays a central role in the response to DNA damage by translocating to the nucleus and ir

ix). Inhibits trypsin, chymotrypsin, plasmin, factor XIA and plasma and glandular kallikrein. Mod

42 is a more effective reductant than amyloid-beta protein 40. Amyloid-beta peptides bind to lip

nation during cell cycle cytokinesis. Regulates apical junction formation in bronchial epithelial c

n cells. Stimulates the release of the GDP-bound but not the GTP-bound RhoB protein. Also in

endocrine regulated secretory vesicles or the ruffled border of the osteoclast, thereby regulatin

es in both telomeres and euchromatin and in vitro binds DNA quadruplex structures. May help

and transcriptional regulation to maintain genomic stability. Plays a central role in the control

carboxylase (E1), lipoamide acyltransferase (E2) and lipoamide dehydrogenase (E3).

pathogenesis of a subset of high-grade B cell non-Hodgkin lymphoma. The N-terminal segmer

6.

Med:29909994). Signaling via NGFR and SORCS2 plays a role in synaptic plasticity and long-

30790544).

of P.falciparum RH5 results in BSG dimerization which triggers an increase in intracellular Ca(2

ng virions to the cell membrane and linking virions to each other. The tethered virions can be ir

/napses.

cells and normal and transformed fibroblast cells.

TGCGGT-3', within their regulatory regions via their runt domain, while CBFb is a non-DNA-bin

Receptor for SIRPA, binding to which prevents maturation of immature dendritic cells and inhib

an important role in retinal development.

1 kinase and controls the entrance into the cell cycle. Involved in initiation and maintenance of

cell cycle arrest in G1 and G2 phases. Acts as a tumor suppressor. Binds to MDM2 and blocks

Med:12176985, PubMed:17260971, PubMed:19996109). Inhibits formation of amyloid fibrils by and proliferation of vascular smooth muscle cells and thus, has a potential role in the maintenance as a regulatory B-type carboxypeptidase. CPD is a homolog of duck gp180, a hepatitis B vir

DNA and histones and may scavenge nuclear material released from damaged circulating cells

ibroblasts, myofibroblasts, endothelial and epithelial cells. Enhances fibroblast growth factor-inhins cell-adhesion properties. Can associate with both E- and N-cadherins. Originally believed t diseases such as breast cancer and possibly Alzheimer disease.

XCR4 to IS (PubMed:20215400). Plays a role in dendritic spine morphogenesis and organizati napses in the peripheral and central nervous systems and has a structural function in stabilizin plication protein A complex (RPA), leading to recruit DNA2 which cleaves the flap until it is too n (PubMed:19004829). Functions as a guanine nucleotide exchange factor (GEF), which activa PRC. Its binding to CAV1 and CARD11 induces T-cell proliferation and NF-kappa-B activation

ent RNA unwinding activity of both EIF4-A and EIF4-F.

es triggering the JAK2/STAT5 signaling cascade. In some cell types, can also activate STAT1 ognized by other nuclear hormone receptors. Involved in modulation of hormonal responses. R

ate and linoleate (PubMed:24269233). Preferentially activates arachidonate than epoxyeicosa major phospholipid located on the surface of VLDL (very low density lipoproteins) (PubMed:180 :tivates arachidonate and eicosapentaenoate as substrates (PubMed:21242590). Preferentially ss of elastic fiber assembly. Regulates osteoblast maturation by controlling TGF-beta bioavaila thesis when DNA polymerase encounters the 5'-end of a downstream Okazaki fragment. It ente oderm patterning and correct axial organization during embryonic development, normal skeletc

ophage function, chemotaxis, and cancer cell invasion. May play an essential role as a negative

on, degradation, or transcytosis. Also known as interceptor (internalizing receptor) or chemokine-linked glucans (PubMed:29061980).

onsense mutations, as well as those that affect splicing, result in a deficiency of this enzyme. In inflammatory responses.

extravasation as they serve as scaffolds for the display of the selectin ligand sialyl Lewis X by cellular elastic fibers (elastogenesis) and in the development of connective tissue. Seems to be in s then transferred to the lipamide cofactor of the H protein (GCSH).

te, the main excitatory neurotransmitter in the brain (PubMed:30575854, PubMed:30239721, Pomal storage disorder mucopolysaccharidosis type IIID (Sanfilippo D syndrome). Mucopolysac leading to maintain its aspartic-type peptidase activity.||Secreted protein that acts as a key reg

gen synthase (GYS1 or GYS2), EIF2B, CTNNB1/beta-catenin, APC, AXIN1, DPYSL2/CRMP2,

er complexes of SRF and PHOX1 and interacts cooperatively with PHOX1 to promote serum-ir oxidation pathway is the major energy-producing process in tissues and is performed through f s the major energy-producing process in tissues and is performed through four consecutive rea ilation, cell cycle progression and developmental events. Histone deacetylases act via the form l1C gene through DNA methylation. May play a role in formation and organization of heterochr ar endothelial growth factor, HILPDA, and other genes whose protein products increase oxygen NLLY) as well as tumor peptide antigens including MAGE1 (EADPTGHSY), MAGEA3 (EVDPIC ed from the cancer-testis antigen CTAG1A/NY-ESO-1, eliciting a polyclonal CD8-positive T cell

est in the spleen, where senescent erythrocytes are sequestered and destroyed. Heme oxyge cules (PubMed:12509468, PubMed:16010978, PubMed:7567451, PubMed:8264621). Single t

ylamide (LSD). Ligand binding causes a conformation change that triggers signaling via guanir Implicated in regulating a variety of cellular processes, including cellular growth, senescence, c

n general as heterodimer with IFNAR2 (PubMed:7665574, PubMed:10049744, PubMed:21854 24716, PubMed:7673114, PubMed:15356148). Required for signal transduction in contrast to li apparatus and the resulting receptor-ligand complex is transported to an acidic prelysosomal c omotes cell migration.

so exhibits IGF-independent antiproliferative and apoptotic effects mediated by its receptor TME



e-binding proteins (G proteins) (By similarity).

minogen activator and elastase (By similarity). Inhibits the kinase activity of RAF1 by inhibiting i of heterotrimeric G proteins assembly by trapping the preloaded G beta subunits inside the CC omain protein HNF1A and enhances its transcriptional activity.

rtial role in pregnancy establishment by proteolytic activation of a number of important factors s

ack regulation by U-PA which cleaves it into an inactive form.

xylysine residues in -Xaa-Lys-Gly- sequences in collagens (PubMed:8621606, PubMed:106864 within these structures. Isoform PML-4 restricts varicella zoster virus (VZV) via sequestration c ity).

lipid that regulates satiety. Receptor for peroxisome proliferators such as hypolipidemic drugs 38591). Many of the substrates contain a PxlxIT motif and/or a LxVP motif (PubMed:17498738 bMed:9268648, PubMed:9705292, PubMed:17893144). During the S phase of the cell cycle, t energy-producing pathways and inhibits energy-consuming processes: inhibits protein, carbohydi

igogenesis, cardiac hypertrophy, angiogenesis, platelet function and inflammation, by directly phc tion and epithelial morphogenesis. Regulates myeloid cell differentiation through SMAD6 phosph for ADGRG6 receptor. May play a role in iron uptake and iron homeostasis. Soluble oligome

ational gamma-carboxylation of specific glutamic acid residues by a vitamin K-dependent gamr ide proteoglycans, such as aggrecan, decorin and fibromodulin. Through cleavage of proteogly on signaling.||Saposin-A and saposin-C stimulate the hydrolysis of glucosylceramide by beta-gl ). Requires the other members of the gamma-secretase complex to have a protease activity. M GP-dependent proteolytic activity. This subunit is involved in antigen processing to generate cla

m 1 in increasing protein levels of PINK1.||Tumor suppressor. Acts as a dual-specificity protein i. Implicated the smooth muscle contractile response to PGE2 in various tissues.

cur (By similarity). In myoblasts, associates with tetraspanins CD9 and CD81 to prevent myotul um response factor (SRF)-dependent gene transcription.||Non-receptor protein-tyrosine kinase thelial-mesenchymal transition. Mediates beta-catenin dephosphorylation at adhesion junctions obin. Beta-catenin may be a substrate for the catalytic activity of PTPRK/PTP-kappa.

lent release of fatty acids from the sn-1 or sn-2 position of glycerophospholipids (PubMed:1961  
d G2 phases of the cell cycle and preferentially repairs DSBs resulting from replication fork coll:

quired for the biogenesis of motile cilia by governing growth and beating efficiency of motile cell  
osphates and activation of MAP kinases.

le leukotriene A4 (LTA-4) into leukotriene B4 (LTB-4) (By similarity).

ritical role in spermatogenesis and in intraflagellar transport processes (By similarity). May be i  
7, regulates translation through RPS6 and EIF4B phosphorylation, and mediates cellular prolifera-

ends on the other subunit in the heterodimer (PubMed:9829974, PubMed:9751058, PubMed:  
913, PubMed:11241183, PubMed:1476165). Contributes to Ca(2+) transport during excitation-

ies, changing chromatin structure by altering DNA-histone contacts within a nucleosome in an

s own chaperone activity, it may contribute to the interaction of HSC70 with various target prote  
urface receptors, signaling via protein kinases leads to activation of Jak kinases (TYK2 and JA  
strogen homeostasis, the sulfation of estrogens leads to their inactivation. Also sulfates dehydr  
. Acts as a negative regulator of MAP3K1/MEKK1. May also act as a cell cycle regulator by act  
he proteolytic release of several other cell-surface proteins, including p75 TNF-receptor, interle  
ceptors. Probably acts as integral component of corepressor complexes that mediates the recr

arator of hydrogen peroxide-mediated signaling events. Might participate in the signaling cascade  
d in cell cycle regulation or in DNA replication. The TFDP2:E2F complex functions in the contro  
1, TGFB2 and TGFB3 signal from the cell surface to the cytoplasm and is thus regulating a ple  
d:9792688). The tight junction acts to limit movement of substances through the paracellular s  
he proteins mediate signal transduction events that play a role in the regulation of cell develop  
:1B/TNFR2. This receptor mediates most of the metabolic effects of TNF-alpha. Isoform 2 bloc

cell division by controlling a set of genes required for this process. One of the activated genes  
e (SIDDT). [provided by RefSeq, Dec 2009]

(MST) activity (By similarity). Together with MRPL18, acts as a mitochondrial import factor for l



orylate cytidine and uridine nucleoside analogs such as 6-azauridine, 5-fluorouridine, 4-thiouridine.

oly of stress fibers in favor of filopodia formation. Plays a role in the formation of cell ruffles (By similarity). Binds to the protein tyrosine phosphatase SH-PTPase (SH-PTPase); some genes have been shown to contain a longer binding motif allowing enhanced binding.

mediates 'Lys-63'-linked polyubiquitination of the DDX58 N-terminal CARD-like region and may play a role in the regulation of the transcription factor NF- $\kappa$ B.

l. Reelin acts via both the VLDL receptor (VLDLR) and LRP8 to regulate DAB1 tyrosine phosphorylation.

varian follicles that are not selected to ovulate. Induces ovarian granulosa cell apoptosis, possibly via a p38-dependent transcriptional activation in response to activated Ras signaling.

overexcitability (By similarity). Promotes expression of the pore-forming alpha subunits at the cell surface. Binds to influenza A virus, SARS coronavirus (SARS-CoV), Marburg virus (MARV), Ebola virus and other enveloped RNA viruses. Has quercetin 2,3-dioxygenase activity (in vitro).

activity and regulates their signaling activities. The G(z)-alpha activity is inhibited by the phosphatase SH-PTPase and ceramide 1-phosphate/C1P (PubMed:9705349, PubMed:9607309, PubMed:1646730). Binds to the 5' cap of eukaryotic mRNA molecules between purine and uridine residues, which critically contributes to the suppression of leaky scanning.

actional 3-alpha-, 17-beta- and 20-alpha HSD. Can interconvert active androgens, estrogens and progestins. Plays a role in the regulation of cell fate. Not required for the proliferation of neural progenitor cells before the onset of neurogenesis (PubMed:22864114, PubMed:23622245, PubMed:25043379). Acts as an activator of the VEGFR signaling pathway.

grin-mediated cell adhesion and migration of airway smooth muscle cells. Suppresses cell motility and inhibits cell-cell interaction with IGF2R.

PLGF-2 isoform of PGF.

cognition component of a SCF-like ECS (Elongin BC-CUL2/5-SOCS-box protein) E3 ubiquitin-ligase complex. Binds to acetaldehyde and propanal. Displays complete lack of activity with citral (By similarity).

ELB/IER3 survival pathway, may provide pancreatic ductal adenocarcinoma with remarkable resistance to apoptosis. Downstream of NMDA receptors and CaMKK-CaMK1 signaling pathway.

), and the second step is the transfer of a phosphate group from ATP to APS yielding 3'-phosph

Involved in Golgi fragmentation. May be involved in phosphorylation of CDK1 on 'Tyr-15' to a lesser extent. Also involved in phosphorylation of ERK1 and/or MAPK1/ERK2, MAPK14, and MAPK8. Possibly involved in helper T-cell function. Similar to Ac transposable elements, but does not code for any transposase activity.

Also involved in the synthesis of ketone bodies acetoacetate, beta-hydroxybutyrate and acetate. Functions as high-affinity

cell adhesion and probably in cell-cell interactions. Mediates cell matrix adhesion in developing neurons. Involved in the biosynthesis of all gangliosides (membrane-bound glycosphingolipids) which play pivotal roles in cell signaling. Also involved in the regulation of SMAD3 and modulating the transcriptional activity of the SMAD3/SMAD4 complex. Possibly associated with

associated with the basal RNA polymerase II transcription machinery. Mediator is recruited to promoters and enhancers. Involved in the secretion of secretase-processed amyloid-beta protein 40 and amyloid-beta protein 42. ||Plays a role in

involved in innate defense mechanisms.

Involved in the regulation of HCO<sub>3</sub><sup>-</sup> from blood to cell. Enhanced expression in severe acid stress could be important for MHC class I molecules. Involved in the N-terminal trimming of cytotoxic T-cell epitope precursors. Involved in the recruitment of the ESCRT-III components to the cytoplasm for further rounds of MVB sorting. MVBs contain various signaling molecules and basal transcription factors. Participates in the transcriptional repressor activity produced by BCL-2. Involved in the regulation of actin (PubMed:24440334). In the absence of actin, it also functions as a NADPH oxidase product

of the

Involved in the regulation of Ras and Rap/Ras GTPases in intracellular signaling cascades. Acts also as an effector for Ras. A high Ca<sup>2+</sup> concentration may be necessary for the function of molecular chaperones involved in the regulation of transcription start sites and may alter chromatin structure, modifying access of transcription factors to the promoter (PubMed:20236627). Plays a role in preventing tumor onset (By similarity).

Involved in the regulation of the double-membrane structure that surrounds the Salmonella-containing vacuole (SCV) during infection. Involved in the regulation of DNA.

Involved in the regulation of the chromosomal passenger complex (CPC) from chromosomes to the spindle midzone in anaphase.

Involved in the regulation of STAT1 signaling and subsequent activation of JAK. Down-regulates SRC activity and signaling. Involved in the regulation of cell cycle progression and developmental events. Histone deacetylases act via the formation of large protein aggregates. Involved in the aggregation-prone proteins. Isoform B but not isoform A inhibits huntingtin aggregation. Has a role in the regulation of

May have a function in the urea cycle (PubMed:11566871).



inducible RAD18 loading, PCNA monoubiquitination, POLH recruitment to replication factories of this complex (By similarity).

Specifically converts active Rab3-GTP to the inactive form Rab3-GDP. Required for normal eye and 4 into its biologically less active metabolite, 12-oxo-leukotriene B4. This is an initial and key step to both spindle and cilia microtubules (PubMed:22493317). Increases the effects of NCOA2 in cy RNA polymerase II. The protein encoded by this gene is similar to cyclin-dependent kinase (PubMed:24554434, PubMed:25503564).

Translation repression activity of FMR1 in brain probably by mediating its association with EIF4E at ribosomes and binds acetylated histones via its bromodomain-like (BRDL) region and activates the pr

; PI4KB kinase activity (By similarity). Involved in long-term synaptic plasticity through its interaction

gamma-induced transcript-selective translation inhibition in inflammation processes. Upon interferon-γ, AC1 at the leading edge of migrating cells (PubMed:25074804, PubMed:25925950). Required for the potency of GDNF on neuronal survival. Controls CBLC function, converting it from an inhibitor of cell proliferation, but stimulates apoptosis by repressing CDKN1A under stress conditions. Acts as a negative regulator of LIMK1 by CDC42BPA and CDC42BPB in the lamellipodia. LRAP25-mediated CDC42BPA/

the TLR9, a nucleotide-sensing receptor in collaboration with PLD4 (By similarity). May be important

in recruiting with other (usually larger) basic-zipper proteins, such as NFE2L1/NRF1, and recruiting the

proteins. Unlike many F-box proteins, FBXL2 does not seem to target phosphodegron within its substrate. Required in spermatozoa for the formation of the inner dynein arms and biogenesis of the axon

5.

junctions at the blood-testis barrier.

in the sonic hedgehog (Shh) signaling pathway.

acts by binding to H3K36me3, a mark for transcriptional activation, and recruiting H3K36me3 hi

ubiquitination and consequent degradation of GORASP1, acting as a component of the ubiquitin ligase

-C (FLNC), essential for maintenance of normal contractile function.

h substrate and inhibitor of APC-FZR1 complex (PubMed:29875408, PubMed:17485488, PubM

gulates the BMP4 signaling in a dose-dependent manner (By similarity). Antagonist of BMP2; it

ells.

rerequisite for neurite outgrowth and plasticity at sites distant from the cell body (By similarity).

distinct DNA-binding specificities as compared to the canonical form and preferentially binds DN/

(PubMed:23990561). Required for ciliogenesis (PubMed:27666822, PubMed:23990561). Req  
on (By similarity).

nation of lamellipodia. Plays a role in cell adhesion, cell spreading, establishment or mainten  
dent of the palmitoyltransferase activity (PubMed:25299331).||Has a palmitoyltransferase activ  
RNA (PubMed:16129689, PubMed:27602518). Associated component of the WMM complex, ;

iny cells and extracellular matrices. Can also sulfate Gal residues in desulfated dermatan sulfa  
!075693). May play a role in cell-cell interactions (PubMed:17308099).

component MAVS. In turn, interferes with MAVS oligomerization, and disrupts the MAVS/TRAF

A replication (PubMed:16387653). May inhibit tumor progression by modulating the transcription

islation, but ubiquitin ligase activity is required for mRNA degradation.

plex, which is required for several steps in the initiation of protein synthesis (PubMed:17581632  
as energy-producing pathways and inhibits energy-consuming processes: inhibits protein, carb

ays filament nucleation and reduces formation of branched filaments (PubMed:12566430). Pla  
duced ATM phosphorylation, p53 activation and cell cycle arrest. Involved in myelopoiesis. Tra

2). Required for normal cell proliferation (By similarity).

TIM (STIM1 or STIM2)-dependent SOCE activity: possibly act by facilitating the deoligomerizati  
and HIPK2. Activation of this pathway causes binding to and phosphorylation of the histone m

ulates meiotic recombination and crossover homeostasis by physically dissociating strand invasion. Length required for presentation on MHC class I molecules. Strongly prefers substrates 9-16 residues as a pro-survival homeostatic factor that attenuates the development of cellular stress. Maintains and activates gene expression by binding a 5'-[CAT]A[CT][CT][CTG]GA[GAT]-3' motif present in the 5' UTR. In its active GTP-bound form together with the export receptor XPO1 on the other. Its phosphorylation. Regulates fast synaptic transmission mediated by glutamate (By similarity). Phosphorylates sphingosine-1-ceramide(d18:1(4E)) to produce globotriaosylceramide/globoside Gb3Cer (d18:1(4E)) (PubMed:14715245). Inhibits autophosphorylation of EGFR, ERBB2 and ERBB4. Important for normal keratinocyte survival (PubMed:14715245).

Translocation of PODXL to the apical membrane initiation sites (AMIS), apical surface formation and maintenance of endothelial barrier organization and function (PubMed:30455415). May have tumor suppressor function.

(PubMed:11115).

Independently of retinol conversion, may regulate liver metabolism upstream of MLXIPL/ChREBP. Inhibits phosphorylation of JNK and p38 (MAPK14).

Nuclear snRNPs contain a common set of Sm proteins SNRPB, SNRPD1, SNRPD2, SNRPD3, SNRPD4, SNRPD5, SNRPD6, SNRPD7, SNRPD8, SNRPD9, SNRPD10, SNRPD11, SNRPD12, SNRPD13, SNRPD14, SNRPD15, SNRPD16, SNRPD17, SNRPD18, SNRPD19, SNRPD20, SNRPD21, SNRPD22, SNRPD23, SNRPD24, SNRPD25, SNRPD26, SNRPD27, SNRPD28, SNRPD29, SNRPD30, SNRPD31, SNRPD32, SNRPD33, SNRPD34, SNRPD35, SNRPD36, SNRPD37, SNRPD38, SNRPD39, SNRPD40, SNRPD41, SNRPD42, SNRPD43, SNRPD44, SNRPD45, SNRPD46, SNRPD47, SNRPD48, SNRPD49, SNRPD50, SNRPD51, SNRPD52, SNRPD53, SNRPD54, SNRPD55, SNRPD56, SNRPD57, SNRPD58, SNRPD59, SNRPD60, SNRPD61, SNRPD62, SNRPD63, SNRPD64, SNRPD65, SNRPD66, SNRPD67, SNRPD68, SNRPD69, SNRPD70, SNRPD71, SNRPD72, SNRPD73, SNRPD74, SNRPD75, SNRPD76, SNRPD77, SNRPD78, SNRPD79, SNRPD80, SNRPD81, SNRPD82, SNRPD83, SNRPD84, SNRPD85, SNRPD86, SNRPD87, SNRPD88, SNRPD89, SNRPD90, SNRPD91, SNRPD92, SNRPD93, SNRPD94, SNRPD95, SNRPD96, SNRPD97, SNRPD98, SNRPD99, SNRPD100. Responsible likely encode proteins involved in the degradation of post-translationally modified proteins.

May play a role in apoptosis. Involved in the formation of microtubule bundles (By similarity).

Involved in the formation of the eye lens capsule (By similarity). Has high activity with the type IV collagen COL4A1, and low activity with type I collagen COL1A1. Shows both exoribonuclease and exodeoxyribonuclease activities. Does not activate ubiquitin-like peptides. Differs from UBE1 in its specificity for substrate E2 charge.

Prevents premature translation termination at the frameshifting site (PubMed:30682371). Regulates Hsp70, protein sorting and membrane trafficking and is required for prolonged survival of neurons. Binds to various substrates.

involved in protein-protein interactions. Subcellularly, the protein localizes to cytoplasmic bodies and the cargo-selective complex (CSC). The CSC is believed to be the core functional component of retromer and is involved in the regulation of asymmetric distribution of phospholipids. Phospholipid translocation seems also to be implicated in the inhibition of prostate tumor growth in vivo.

GlcNAc. Also able to catalyze the transfer of sulfate to position 6 of the N-acetylgalactosamine and SPIRE2 (PubMed:22330775, PubMed:21730168). Involved in intracellular vesicle transport

(PubMed:173190). Acts on LPA containing saturated or unsaturated fatty acids C16:0-C20:4 at the sn-1 position

and regulates circadian rhythms in gene expression, which are translated into rhythms in metabolism and behavior

via a heterotrimeric complex related to retromer cargo-selective complex (CSC) and essential for the formation of MVBs contain intraluminal vesicles (ILVs) that are generated by invagination and scission from

the plasma membrane. Lys-63'-linked polyubiquitination of IRAK1 allowing subsequent NF-kappa-B activation (PubMed:15111111)

associated with surfactant protein A/SP-A, pulmonary surfactant-associated protein D/SP-D and the lipid transporter ABCA1. Involved in the integrity and the organization of stable microtubule binding sites in the outer plate of the kinetochore and in cellular lipid transport. Plays a role in FGF signaling via its role in the rapid internalization of FGF receptors (PubMed:24163370).

Involved in the development of atherosclerosis. Also involved in organ detoxification by hydrolyzing exogenous xenobiotics. In rat acts as a GTPase for the small GTPase Rap. [provided by RefSeq, Sep 2015]

It can also bind to the non-methylated consensus sequence 5'-CTGCNA-3' also known as the CpG dinucleotides from pathogens, and mediated by the nucleotide-sensing receptor TLR9. It phosphorylates the microtubule-associated proteins MAP2 and MAP4 (PubMed:14594945). Involved in chemotactic response. Induces calcium mobilization. Binds to CXCR6/Bonzo.

are sensitive to Slit proteins thus inhibiting Slit signaling through ROBO1 (By similarity). Required for the cytosolic face of the membrane. In response to ER stress, transported to the Golgi, where

18-dihydroceramide), to a lesser extent on C2-ceramide and C6-dihydroceramide, but not on other ceramides. MND5A and MND5B are both required for catalytic activity of the CTLH E3 ubiquitin-protein ligase complex. MND5A interaction with WDR48 to have a high activity (PubMed:19075014, PubMed:26388029). Not

Probable) (PubMed:29911972). Binds proteins and peptides with a Pro/N-degron consisting of

15560782, PubMed:18411297, PubMed:19786558, PubMed:25083013). Acts as the negative regulator of (By similarity).

the elongating chondroitin polymer. Isoform 2 may facilitate PRKN transport into the mitochondria

The complex promotes relaxation of negative and positive supercoiled DNA and DNA decatenation. Specifically recognizes the E2 recognition site 5'-TTTC[CG]CGC-3'. Directly represses transcription of a subset of TGFB regulatory targets, such as POSTN (By similarity).

to fatty acyl-CoA substrates including palmitoyl-CoA and stearoyl-CoA (PubMed:15610069, PubMed:15610069,

PubMed:15610069, PubMed:24898248, PubMed:28219928). Plays a central role in mitochondrial calcium homeostasis and features associated with MYC, including promotion of apoptosis, alteration of morphology, enhanced mitochondrial biogenesis

pathway (PubMed:15378603). Functions as a scaffolding protein to promote G beta:gamma-mediated signaling. Only scarcely detected, suggesting that it only exists in some tissues.

gamma subunits of heterotrimeric G protein. Mediates the activation of RAC1 in a PI3K-dependent and form-specific manner (PubMed:11847232, PubMed:18957440, PubMed:23576435). Modulates

potently inhibits endothelial cell proliferation and angiogenesis (PubMed:9459295). May inhibit the function of Th2 specific factor.



res the GPI-anchor of RECK, leading to release RECK from the plasma membrane (By similarity mediated immunity (PubMed:30487606). Required for anti-tumor activity of T-cells by promoting ADAM10-mediated cleavage of CDH5 (By similarity).

yalin granules and the development of the barrier function of the epidermis (By similarity). Downregulates endothelial fenestrae contributing to the passage of water and solutes across

distinct role in decorating the cadherin domains with O-linked mannose glycans at specific regions. Has strong activity toward lactosylceramide (LacCer) and neolactotetraosylceramide (nLc(4)Cer) required for the resolution of meiotic double-strand breaks.

subunit, possibly by helping it fold into its correct conformation for activity.

in (PubMed:19951071). May affect bone resorption and help to maintain bone mass (PubMed:1

F-kappa-B via BCL10 and IKK. Stimulates the phosphorylation of BCL10. Also activates the TNF

NA resection by the MRE11-RAD50-NBN/NBS1 (MRN) complex by recruiting the MRN complex and DNA end resection kinase C proteins (By similarity).

phospholipase C (GlcCer) from the trans-Golgi network (TGN) to the plasma membrane and plays a pivotal role in the generation of 2 second messenger molecules diacylglycerol (DAG) and inositol 1,4,5-trisphosphate

LRP6 and frizzled receptors that are activated by extracellular Wnt receptors, triggering the canonical Wnt signaling pathway. Has a distinct role in decorating the cadherin domains with O-linked mannose glycans at specific regions. Regulates Schwann cells differentiation by mediating ubiquitination of GLUL. Promotes neurodegeneration. The ABL2B complex binds intraflagellar transport (IFT) complex B from the large pool pre-docked at the basal body.

hydroepiandrosterone (DHEA), pregnanolone, pregnenolone and allopregnanolone (PubMed:23

reorganization and for efficient endothelial cell elongation. In quiescent endothelial cells, triggers

16, PubMed:26068852, PubMed:28877472, PubMed:28222186, PubMed:30111836). Promotes

p3 releases Ca(2+) from intracellular stores. Essential for trophoblast and placental development. Promotes desensitization (By similarity).

Has a preference for membranes enriched in phosphatidylserine and phosphoinositides (Pi(4,5) biphosphate). Alternative splicing results in multiple transcript variants encoding different isoforms. [provided by RefSeq]

Acts like a sheddase by mediating the proteolytic release and secretion of active site-containing fragments. Located in a cluster on chromosome 16. Alternatively spliced transcript variants containing different 5' UTRs

metabolic fuel, by the action of four enzymes that constitute the Leloir pathway: GALM, GALK1 (galactose 4-epimerase)

This enzyme may be associated with the disease D-glyceric aciduria. Alternatively spliced transcript variants exist. p53/TP53-dependent transcription and apoptosis, suggesting an important role in p53/TP53 stress response

mediates endocytosis of Delta receptors.

1095, PubMed:12539043, PubMed:14739303). Ligand binding to these receptors results in TRIP1

mediating the assembly of an ENaC-regulatory complex (ERC).

located at the cell-cell contact site of the lateral membrane of the apical disk thereby regulating gap junction communication (By similarity). May also play a role in

fiber differentiation, probably by inhibiting FGF-mediated phosphorylation of ERK1/2 (By similar

) protein huntingtin (HTT) in case of endoplasmic reticulum stress by inhibiting the endocytosis after the penetration of retroviral nucleocapsids into target cells of infection and the initiation of phosphorylation of ERK1/2 (By similarity). Inhibits TGFB-induced epithelial-to-mesenchymal transition. The RNA polymerase III transcriptional repressor Maf1 to regulate gamma-aminobutyric acid A

multiple transcript variants. [provided by RefSeq, Dec 2014]

of a luminal glucose-6-phosphatase. May not play a role in homeostatic regulation of blood glucose

reticulum membrane from metaphase chromosomes.

dependent transcriptional activation, by participating in recruitment to androgen-receptor target

moting their degradation. Induces apoptosis via a p53/TP53-dependent but caspase-independent pathway. Required for efficient progress through mitosis and cytokinesis. Required for normal formation of glucose 1-phosphate. 5 or 6-phosphosugars are bad substrates, with the exception of glucose 6-phosphate. Mutations in this gene are associated with deafness. Mutations in this gene are associated with deafness.

activates GPR7 and GPR8 more efficiently than NPW30.

involve CEP152, CDK5RAP2 and CEP63 through a stepwise assembled complex at the centrosome.

(PubMed:16368756, PubMed:21224894). 3-oxoalanine modification, which is also named formyl

}]

form that is able to recruit to membranes different set of downstream effectors directly responsive to the activation of NPPA. Also acts as a cofactor with GATA4, a key cardiac regulator (By similarity).

acid starvation (PubMed:24310610).||Metabolic-stress sensing protein kinase that phosphorylates and to integrate endothelial Notch and Wnt signaling to control stalk cell proliferation and to stabilize saturated and unsaturated long chain fatty acyl-CoAs (C12-C20).

to fulfill cellular energy requirements and preventing excess ROS production. Whereas LC3s promote spinal neural progenitor cells differentiation.

ated arginine or lysine residues, to generate 'tailless nucleosomes', which may trigger transcription of RNA polymerase II as part of capped and polyadenylated primary transcripts (pri-miRNAs) that circulate in the blood [Wang et al., Nat Commun, Dec 2017]

exists in multiple transcript variants encoding isoforms that share sequence identity with the upstream protein and mediate neuronal transduction through interaction with the NMDA receptor subunit GRIN1 (By similarity).

is involved in regulating a many physiological and pathological processes including neuronal differentiation.

B heterooligomers regulate phenylephrine (PE)-stimulated ERK signaling in cardiac myocytes. ||Cell adhesion molecule that mediates both heterotypic cell-cell contacts via its interaction with alpha-5 beta-1 integrin (PubMed:26373694, PubMed:25450233).

conversion of fructose-1,6-biphosphate and fructose 1-phosphate to dihydroxyacetone phosphate and glyceraldehyde 3-phosphate. It leaves tRNA within anticodon loops to produce tRNA-derived stress-induced fragments (tiRNAs) that are involved in the regulation of APP-beta. Component of the LIN-10-LIN-2-LIN-7 complex, which associates with the neuronal cytoskeleton.

. Produces a large instantaneous current. Modulated by intracellular chloride ions and pH; acid

the formation of other types of polyubiquitin chains. The E3 ubiquitin-protein ligase activity is re  
to ssDNA over double-stranded DNA, enabling RAD51 to displace replication protein-A (RPA)

), BCR (B-cell receptor) and FCER1 (high affinity immunoglobulin epsilon receptor) signal trans  
CK1 or CDK2. The cyclin subunit confers the substrate specificity of these complexes and diffe  
It such as taurothiocholate sulfate (PubMed:16332456). May function as a cellular cisplatin tra  
/, and does not display selectivity based on the chirality of the substrate. It is also an essential  
Has a low bile-binding ability. May play a role in myelin formation.

the TOM complex to the sorting and assembly machinery (SAM complex) of the outer membra

OS1 and ABI1, forms a trimeric complex that participates in transduction of signals from Ras to  
repressor gene.

a major lipid in myelin, kidney and epithelial cells of small intestine and colon.

TAT5 pathway (By similarity).||The soluble form (GHBP) acts as a reservoir of growth hormone

amylcysteine synthetase deficiency has been implicated in some forms of hemolytic anemia. A

ones thereby play a central role in transcription regulation, DNA repair, DNA replication and ch  
res architectures and regulates cell adhesion, migration and differentiation. This is one of the is  
iding to it and promoting its dimerization.

ling and V(D)J recombination and probably other processes. Binds DNA with a preference to n  
similarity).

ctivation of MAPK1 and MAPK3. ||The insulin-like growth factors possess growth-promoting acti  
ling specificity to the enhancer element B of the flounder antifreeze protein gene intron. Binds t  
i, gonadal hormone secretion, germ cell development and maturation, erythroid differentiation,  
2953). Regulates the transcription of type I IFN genes (IFN-alpha and IFN-beta) and IFN-stimu  
+)/voltage sensitivity of the KCNMA1 channel. It also modifies KCNMA1 channel kinetics and a

ilarity).

DM2-7 ring are formed through the interaction surfaces of two neighboring subunits such that a DM2-7 ring are formed through the interaction surfaces of two neighboring subunits such that a DM2-7 ring are formed through the interaction surfaces of two neighboring subunits such that a factor for HOXA7 and HOXA9 in the induction of myeloid leukemias.

and also collagen type III, but at lower rate. It has no effect on type I, II, IV and V collagen. H into precursor Z to generate a dithiolene group. In the complex, serves as sulfur donor by being g (PubMed:23251525).

chain. The immediate electron acceptor for the enzyme is believed to be ubiquinone.

chain. The immediate electron acceptor for the enzyme is believed to be ubiquinone.

carboxylation of glutamate residues in prothrombin synthesis.

n through a cGMP-mediated signal transduction pathway. NO mediates vascular endothelial g tacts between Schwann cells and axons. Plays a role in the formation and maintenance of the

ion. Is an integral component of the pericentriolar material (PCM). May play an important role in

eotide (FGAM) and glutamate (By similarity).

participates mainly to the flop of phosphatidylcholine, phosphatidylethanolamine, beta-D-glucos

: glycogeneolysis in the testis. In vitro, phosphorylates PYGM (By similarity).

esis (ECO:0000269|PubMed:27694521).

ABA A receptor (By similarity). Regulates the turnover of receptors and thus contributes to the i hemic brain.

olved in proper maturation of stable RNA species such as rRNA, snRNA and snoRNA, in the e f the splicing-dependent multiprotein exon junction complex (EJC) deposited at splice junction c

al non-coding RNAs. Pol II is the central component of the basal RNA polymerase II transcriptic ssociated with two 19S regulatory particles, forms the 26S proteasome and thus participates in n factor C (RFC) clamp loader complex (PubMed:12578958). Acts then as a sliding clamp platf

of the multiprimed DNA template.

ruits and activates different proteins and complexes involved in DNA metabolism. Thereby, it p  
s a ribosomal protein that is a component of the 40S subunit and a member of the S14P family

IN2. Activates the splicing of MAPT/Tau exon 10. Alters pre-mRNA splicing patterns by antagc  
and apoptosis. Plays an important role in cellular stress response. Contributes to regulation of  
lated with reduced phosphorylation of CDK1. Plays a role as a positive regulator of the sonic he  
ession, signal transduction and transcription. Specifically recognizes phosphorylated CDKN1B/  
949). Can also transport L-cysteine (PubMed:21123949). Functions as a symporter that transp  
-type D simian retroviruses.||Sodium-dependent amino acids transporter that has a broad subs  
e priming, fusion and dilation of exocytotic fusion pores (PubMed:28288128, PubMed:3040482)  
ling of stem loop IV of U2 snRNA (PubMed:9716128, PubMed:27035939).

e building blocks of the spliceosome (PubMed:11991638, PubMed:18984161, PubMed:193256  
SUN3 and probably SYNE1 through a probable SUN1:SYNE3 LINC complex to the nuclear env  
at the cell membrane, and thereby contributes to increased channel activity. Slows down the in

/AMP2 which mediates the fusion of synaptic vesicles with the presynaptic plasma membrane.  
netic transcriptional repression by recruiting HP1 (CBX1, CBX3 and/or CBX5) proteins to methy

T-lymphocyte-specific enhancer element (5'-WWCAAAG-3') found in the promoter of the CD3E

ric properties. Plays a role in ER stress response, via its interaction with the activating transcrip  
the inflammatory response (PubMed:9237759, PubMed:10835634, PubMed:27022195). Also in  
mina and thereby help maintain the structural organization of the nuclear envelope. Possible re  
ation at a target site in duplex DNA. The scissile phosphodiester is attacked by the catalytic tyr  
of estrogen receptors alpha and beta while isoform 5 enhances the transcriptional activity of the  
rescue of pyrimidine bases for nucleotide synthesis.

CNA (PubMed:16531995). Has almost no deubiquitinating activity by itself and requires the inte  
ig mRNA transcripts by promoting their poly(A) tail removal or deadenylation, and hence provid

bule-based structures that protrude from the surface of epithelial cells.

afts. It interacts with caveolin-1. [provided by RefSeq, Jul 2008]

l carrier protein reductase activity, and thereby plays a role in mitochondrial fatty acid biosynthe

28, PubMed:14966270). Specifically recognizes and binds acylated histone H3, with a preference for acetylated H3 (PubMed:9751058, PubMed:10049700, PubMed:11557028, PubMed:10391915, PubMed:10570000). It is involved in regulation of gene expression, DNA repair, DNA replication and chromosomal stability. DNA accessibility is regulated

from *S.typhimurium* and *S.minnesota*.

, diacylglycerol pyrophosphate/DGPP, sphingosine 1-phosphate/S1P and ceramide 1-phosphate

and IFNG synthesis from T-helper 1 (Th1) cells (PubMed:10653850). Contributes to IL18-induced

expression (PubMed:9856465, PubMed:17141802, PubMed:17296725, PubMed:23418588, PubMed:26344098).

mediated phosphorylation and inhibition of SLC9A3 (PubMed:18829453). May also act as scaffold for the activation of ASIC3. May be involved in regulation of proton sensing in dorsal root ganglion cells. Involved in iron homeostasis, thus triggering the activity of Fe(2+) prolyl hydroxylase (PHD) enzymes, and leading to

its involvement in formation of short side-chains. Mediates initiation of polyglutamylation of nucleosomes (PubMed:11590237, PubMed:15824131). Its function related to the spindle assembly machinery is probably conserved (PubMed:17719545 PubMed:17681131, PubMed:23486064). Also involved in promoting ciliogenesis

P53. Acts as a regulator of cellular senescence and cellular ploidy by mediating phosphorylation of p53. It is involved in the cellular resistance to DNA damage stresses, like ionizing radiation (IR), ultraviolet (UV) and

its involvement in cell cycle progression, signal transduction, transcription and transcription-coupled nucleotide excision repair. It is involved in transcriptional regulation, cell cycle progression and developmental events (PubMed:10220000 PubMed:10220000 PubMed:10220000). It is involved in the nucleosome assembly process, bringing newly synthesized histones H3 and H4 to replicating DNA

It is an active ligand-binding subunit in mediating retinoid responses through target genes defined by retinoid response elements. It transports the copper ions to the Cu(A) site on the cytochrome c oxidase subunit II (MT-CO2/CCO2)



between AURKA and PLK1, thereby enhancing AURKA-mediated PLK1 phosphorylation.

→ conversion of lysophosphatidylserine (1-acyl-2-hydroxy-sn-glycero-3-phospho-L-serine or LPS) to phosphatidylserine (PS) is a key step in the activation of type I interferon and inhibits infection with vesicular stomatitis virus (By similarity). Pro

ubiquitination and subsequent degradation of target proteins: it mainly mediates the formation of (methyl-2-thiouridine (m<sup>2</sup>s<sup>2</sup>U) pseudouridine (m<sup>1</sup>acp<sup>3</sup>-Psi) conserved in eukaryotic 18S rRNA. Is not able to methylate 2-thiouridine. A component of the TACC3/ch-TOG/clathrin complex proposed to contribute to stabilization of kinetochore (K) and 4 snoRNAs.

regulation of timing of sister chromatid segregation, and maintenance of spindle pole architecture (PubMed). With TAF5L, acts as an epigenetic regulator essential for somatic reprogramming (By similarity).

Polymers of DNA polymerase delta complexes (Pol-delta3 and Pol-delta4, respectively), plays a role in high fidelity genomic DNA replication. Associates with SASS6, CENPJ/CPAP, CCP110, CEP135 and gamma-tubulin. When overexpressed, it is a candidate gene designates it to be a candidate for diseases such as Nance-Horan syndrome, sensorineural hearing loss pathway.

involved in immune regulation, stem cell pluripotent and self-renewal maintenance and embryonic development.

involved in the context (By similarity). The side chain of Glu-231 determines which of the two opposing actin monomers of the heptameric LSM2-8 complex binds specifically to the 3'-terminal U-tract of U6 snRNA (PubMed). It is compatible with extension and ligation by either removing 3'-phosphates from, or by phosphorylation of the 3'-terminal adenosine.

involved in proper maturation of stable RNA species such as rRNA, snRNA and snoRNA, in the eukaryotic cell.

involved in an important role in vertebrate development, where they locally inhibit Wnt regulated processes.

ion. In vitro shown to be involved in the homologous recombination mechanism for the repair of (glycosaminoglycans) sulfation, inhibits signaling by heparin-dependent growth factors, diminishes proliferation. The nucleoskeleton is a complex involved in the connection between the nuclear lamina and the cytoskeleton. The nucleoskeleton is involved in the presence of type I topoisomerases and converts nicked DNA into positive knotted forms. The nucleoskeleton is involved in proper maturation of stable RNA species such as rRNA, snRNA and snoRNA, in the eukaryotic dependent fashion. In contrast, it does not coactivate nuclear receptors for retinoic acid, vitamin D, and thyroid hormone.

Importance of this gene may be associated with survival in human glioblastoma patients. [provided by RefSeq]. The heptameric LSM2-8 complex binds specifically to the 3'-terminal U-tract of U6 snRNA (PubMed:16785495). Also binds heterodimeric complex with IL17RC (PubMed:16785495). Also binds heterodimeric complex with small molecules. Often, several claudin family members are coexpressed and interact with each other. Involved in chromatin assembly and with HIRA to promote replication-independent chromatin assembly. Required for cell cycle progression from G1 to S phases. Involved in the mitotic checkpoint complex (MCC) from the APC/C: not required for APC/C activity itself. Involved in the oxidative pathway.

Involved in the activation (such as CASP9) and inducing mitochondrial permeability transition. May be involved in the transport of proteins from the TOM complex to the sorting and assembly machinery (SAM complex) of the outer mitochondrial membrane.

Involved in stabilizing MDM2 stability. This promotes MDM2-mediated ubiquitination of p53/TP53 and its subsequent degradation. Involved in the stability of most compounds, and therefore their renal excretion, but it can also result in bioactive compounds that affect cell survival, morphology and differentiation (PubMed:23922215, PubMed:25620095). Uninvolved in the regulation of cell survival, morphology and differentiation.

Involved in the estimated 75% protein to rRNA composition compared to prokaryotic ribosomes, where this ribosomal protein may be involved in the atRA (all-trans retinoic acid) signaling through the STAT1-alpha (signal transducer and activator of transcription 1) pathway.

Involved in the estimated 75% protein to rRNA composition compared to prokaryotic ribosomes, where this ribosomal protein may be involved in the regulation of cell survival, morphology and differentiation. Involved in the regulation of cell survival, morphology and differentiation. May be a regulator of breast tumor cell invasion.

C (mitochondrial translation regulation assembly intermediate of cytochrome c oxidase complex)

phosphorylation of Glu residue of proteins with a Gly-Gln-Xaa-Xaa-Xaa-Arg motif (PubMed:18539146)

promote the resolution of double-strand DNA catenanes (intertwines) between sister chromatids.

necessary to ensure substrate recognition, and therefore, effectual transfer of the oligomannose

activity of DMC1 as well as DMC1 D-loop formation from double-strand DNA. This complex stabilizes

intra-S-phase and G/2M cell-cycle checkpoints and the maintenance of genome stability.

thought to act as a cellular signaling inhibitory receptor by recruiting cytoplasmic phosphatases like

mitochondrial function (By similarity). Maintains 16S rRNA levels and functions in mitochondrial

5828). The complex is probably involved in the transfer of the threonylcarbamoyl moiety of threonine

to the basal RNA polymerase II transcription machinery. Mediator is recruited to promoters like

3]

an estimated 75% protein to rRNA composition compared to prokaryotic ribosomes, where this ratio is

near deoxyinosine in conditions of energy deprivation.

organization of the microtubules during centriole duplication. A pseudogene of this gene is found and

stimulates its ATPase activity.

inhibited by interleukin 10.

cytochrome c oxidase subunit II (MT-CO2/COX2) (PubMed:29355485, PubMed:29381136). Interacts specifically

with

-rRNA sequences (PubMed:28115465).

mitochondrial

reticulum.

provided by RefSeq, Dec 2015]

absence of CDC42 (By similarity). May play an important role in the maintenance of sarcomere

and endoplasmic reticulum-associated degradation (ERAD) system (By similarity).

primary miRNA processing complex containing DGCR8 and DROSHA, thereby playing a role in

peptide bonds in oligopeptides (PubMed:16595688).

→ ciliary tip in response to activation of the SHH pathway, suggesting it is involved in the dynamic processes. Plays a key role in sensing and limiting infection by intracellular bacteria and DNA viruses.

cytochrome oxidase complex, the final protein carrier in the mitochondrial electron-transport chain.

10 acids at the blood-brain barrier and in the supply of maternal nutrients to the fetus through the placenta.

processes. Recruits ITCH, NEDD4 and SMURF2 to endosomal membranes. Negatively regulates the transition zone of primary cilia and acting as a barrier that prevents diffusion of transmembrane proteins.

18). Acts as a tension sensor that associates with catenated DNA which is stretched under tension.

axon guidance and cell migration (By similarity). Probable signaling receptor which may play a role in the replication checkpoint induced by hydroxyurea or ultraviolet light. Forms a complex with

in the replication checkpoint induced by hydroxyurea or ultraviolet light. Forms a complex with

decay (NMD) pathway (PubMed:23917022).

omes. Microtubule severing may promote rapid reorganization of cellular microtubule arrays and (PubMed:28544275).

incorporation of newly synthesized CENPA into centromeres via its interaction with the CENPA-NAC and clustered with the gene encoding ankyrin repeat and SOCS box-containing protein 7. Alters recruitment to DNA repair sites. Required for maintenance of chromosomal stability. Specifically binds to

→ been noted for this gene, however, not all are likely to encode viable protein products. [provided by

ation.

and tRNA(Gln) at the wobble position. ATP is required to activate the C2 atom of the wobble base pair. Required for bipolar spindle, which is needed for proper tension generation between sister chromatids. Required for localization of proximal CC proteins at the distal CC (By similarity). Maintenance of protein localization. Inhibits processive growth of centriolar microtubules. Acts as microtubule plus-end tracking protein. Required for G2/M checkpoint during doxorubicin-induced DNA damage.

t act on phosphatidate (By similarity).

beta gamma subunits of heterotrimeric G protein. May function downstream of heterotrimeric G protein-operated and store-independent Ca(2+)-influx. Regulates basal cytosolic and endoplasmic reticulum by promoting stabilization of ERCC6 by recruiting deubiquitinating enzyme USP7 to TC-NER complex.

heptameric LSM2-8 complex binds specifically to the 3'-terminal U-tract of U6 snRNA (PubMed:10550000). May mediate the membrane association of SRPR (By similarity).

requires its ABM domain and may implicate the stabilization of the interaction between HIF1AN and HIF1K1 and facilitates the ATR-dependent phosphorylation of both proteins. Can also bind specifically to DNA and differentiation (PubMed:23754376). May play a role in the control of male meiosis and incorporation of newly synthesized CENPA into centromeres via its interaction with the CENPA-NAC complex in the presence of type I topoisomerases and converts nicked DNA into positive knotted forms.

SIN3A and CTBP2. May be involved in the development of central and peripheral nervous system proteins (GABARAP, GABARAPL1, GABARAPL2 or MAP1LC3A). The ATG12-ATG5 conjugate.

species. RNase treatment of permeabilized cells indicates that the nucleolar localization is RNA dependent.

binds DNA with a strong preference for DNA substrates that mimic structures generated at stalled replication forks. Associates with the CENPA-CAD (nucleosome distal) complex and may be involved in incorporation of newly synthesized DNA.

- and very long-chain fatty acids (VLCFAs) per cycle. Condensing enzyme that elongates fatty  
 acyl-CoA to 3-hydroxyl metabolites. Exhibits reductive 3-beta-hydroxysteroid dehydrogenase activity toward  
 incorporation of newly synthesized CENPA into centromeres via its interaction with the CENPA-NAC  
 RNA. TREX is recruited to spliced mRNAs by a transcription-independent mechanism, binds to  
 the MLL2/MLL3 complex. Proposed to be recruited by PAXIP1 to sites of DNA damage where  
 substrates such as Muc2, Muc5AC, Muc7, and Muc13 (-58). May be involved in O-glycosylation in  
 the CENPA-CAD (nucleosome distal) complex and may be involved in incorporation of newly syn  
 thesized CBX1 (CBX1, CBX3 and/or CBX5) proteins to methylated histones. Mainly functions in heterochr

osomal snRNPs contain a common set of Sm proteins SNRPB, SNRPD1, SNRPD2, SNRPD3, SNI  
 and nuclear snRNPs contain a common set of Sm proteins SNRPB, SNRPD1, SNRPD2, SNRPD3, SNI

autosomal recessive neurometabolic disorder resulting in moderate to severe cognitive disability  
 T7/HBO1 specificity towards histone H4 acetylation (H4K5ac, H4K8ac and H4K12ac), regulatin  
 g gap junctions (DHJ) and hence stimulates TOP3A-mediated dissolution. Required for BLM phospho  
 tylation and remodeling of neuronal connections.

is not involved in deposition of H2A.Z/H2AZ1 in the nucleosome. May stabilize the evicted H2A.Z/H2AZ1  
 when probably delivered to ferrochelatase to catalyze Fe(2+) incorporation into protoporphyrin IX  
 (PubMed:15118078).

is repaired by homologous recombination in a manner that depends on its association with BRCA1.  
 involved in mineralization (PubMed:30082715, PubMed:29878199). Also involved in the regulation of cellular

is a component and in collaboration with CIAO1 specifically matures ACO1 and stabilizes IREB2, contain  
 ing a phosphorylated O-mannosyl trisaccharide (N-acetylgalactosamine-beta-1,3-N-acetylglucosa  
 mine-6-phosphate) (provided by RefSeq, Sep 2011]

VC5-SMC6 complex at replication-coupled interstrand cross-links (ICL) and DNA double-strand break repair. Constitutes the major lysosomal potassium channel. Consumption and ATP production and via its modulation of the respiratory chain activity can regulate mitochondrial function. It is involved in DNA replication and recombination intermediates and from DNA damage. Component of the NOLC1 and TCOF1: monoubiquitination promotes the formation of a NOLC1-TCOF1 complex that is involved in DNA replication and recombination intermediates and from DNA damage.

sn-glycerol-3-phosphate (phosphatidic acid or PA) by incorporating an acyl moiety at the sn-2 position. It is involved in the regulation of the activity of the enzyme.

and CEP120-mediated elongation dependent manner during the cell cycle S/G2 phase after formation of the mitotic spindle. It is involved in the regulation of the activity of the enzyme.

AURKB and controls the dynamic behavior of AURKB on mitotic chromosomes and thereby coordinates the cell cycle. PubMed:28437394, PubMed:28302793, PubMed:31693891, PubMed:31452512). RBM39 degradation is involved in the regulation of the activity of the enzyme. Mediator is recruited to promoters and enhancers and insertion into the late CIII dimeric intermediate within the mitochondrial inner membrane.

composed of a neuropilin and a plexin. The plexin modulates the affinity of the complex for specific ligands. It is involved in the regulation of the activity of the enzyme.

Angiotensin II receptor/AGTR1 (Probable). It is involved in the regulation of the activity of the enzyme.

defect. Mutations in this gene are associated with the autosomal recessive neurodegenerative disorder, spina-IV that contain it.

ome partitioning is accurate in both meiotic and mitotic cells and plays an important role in DNA  
xophages, and induces the release of pro-inflammatory cytokines such as TNF, IL1B, IL6, CCL  
092684).

port of Mg-ATP in exchange for phosphate, catalyzing the net uptake or efflux of adenine nucle

ebly promotes membrane rigidity (PubMed:30509349). Does not appear to have any effect on L

le-stranded DNA. Has low efficiency with single-stranded substrates. Requires molecular oxygen  
in ligase complex which mediates the ubiquitination and subsequent proteasomal degradation

ions (Chikaev et al., 2005 [PubMed 15676285]).[supplied by OMIM, Mar 2008]

siently associated nuclear transport factors. May play a role in the association of MAD1 with the

location of proteins into the endoplasmic reticulum. It also plays a role in the ubiquitin-mediatec

itely, also known as Laurin-Sandrow Syndrome. Alternatively spliced transcript variants have been  
d Holliday junctions. May be required in mitosis for the processing of stalled or collapsed replica

zation of stable microtubule binding sites in the outer plate of the kinetochore (PubMed:147387

ner ear, and for normal survival of hair cells in the organ of Corti (PubMed:17186462).



ver, and roles in inflammation and immune response. This family member plays a role in cell-cy  
, that appear to have been derived from the piggyBac transposons. This gene belongs to the s  
centriole amplification in multiciliated cells. Overexpression results in excess foci-bearing cent  
phase (PubMed:19502560).

negatively regulate bHLH-mediated transcription through an N-terminal repressor domain. Serve

involved in nuclear movement during fibroblast polarization and migration. Proposed to be invol  
; the function seems to depend on KCTD11:KCTD6 oligomerization. Can function as antagonis  
ded by RefSeq, Feb 2013]

r anaphase onset during mitosis, when chromosomes undergo bipolar attachment on spindle m  
x is a direct component of the kinetochore-microtubule interface and directly associates with mi

1 of RELA at 'Ser-536' (PubMed:24681962). May be involved in early neuronal development (B

14, PubMed:23530041, PubMed:26887952). Can use other acyl donors, but with less efficienc

glycolipids to glycoproteins (By similarity).

l proteins suggests that it may link receptor tyrosine phosphatase with its substrates at the plas  
aired for building functional cilia. Involved in the organization of the subapical actin network in n  
-fucose formed either by the de novo or salvage pathways is transported into the endoplasmic  
l metabolite Chivosazole F (PubMed:28796488).

ducts are an intron and two tRNA half-molecules bearing 2',3' cyclic phosphate and 5'-OH termi

ization of microtubules of centriolar origin, possibly to suppress aberrant cilia formation (PubMec

uridine of tRNAs at wobble position.

liates, also known as Holliday junctions, are formed during homologous recombination and DN  
s natural killer cells to secrete IFNG.

during endosome sorting (PubMed:18159949, PubMed:20175130). Involved in endocytic traffi

oration of newly synthesized CENPA into centromeres via its interaction with the CENPA-NAC

ensation of N-methylguanine with 2 carbon atoms from pyruvate to form the tricyclic 4-demeth  
lasmic reticulum Ca(2+) stores during autophagy. Contributes to BIK-initiated autophagy, while

logene is a member of the DUXA homeobox gene family. [provided by RefSeq, Jul 2008]

NA polymerase II as part of capped and polyadenylated primary transcripts (pri-miRNAs) that c

NA polymerase II as part of capped and polyadenylated primary transcripts (pri-miRNAs) that c  
nuclear pore complex (NPC) is mediated by KPNB1 through binding to nucleoporin FxFG repea

: involved in CDH1-mediated adhesion and signaling in epithelial cells.

nted and paternally expressed in many tissues. [provided by RefSeq, Nov 2015]

PubMed:23576762, PubMed:23665031). The BCR(KLHL3) complex acts by mediating ubiquitin  
the midbody to the cell membrane during cytokinesis. Plays key roles in controlling cell growth  
(PubMed:23870127). May play a significant role in podocyte cell migration (PubMed:24676636  
lly, and intercalate between neighboring cells, leading to convergence toward the mediolateral

rs (TLRs) through terminating NF-kappa-B activity. Essential component of a ubiquitin-editing p  
uring T-cells development. In the cytoplasm, plays a pivotal role in signal transduction via its as

4699129, PubMed:15062103, PubMed:15235793, PubMed:15239953, PubMed:15548592, Pu  
e transition, an essential step for the formation of an organized central spindle midzone and mi  
Enhances the incorporation of serine into phosphatidylserine and sphingolipids. May play a rol  
URKA localization to spindle microtubules (PubMed:18663142, PubMed:19208764). Activates

5). Also catalyzes the phosphorolysis of S-methyl-5'-thioadenosine into adenine and S-methyl-  
ie enhancer elements of a number of cellular promoters, including those of the class I MHC, int

increases glycogenolysis and relaxes the smooth muscle of trachea, stomach and gall bladder.  
gulation, DNA repair, DNA replication and chromosomal stability. DNA accessibility is regulated  
ration and apoptosis (PubMed:24784001, PubMed:16648480). During cytokinesis, targets to c  
3'-5' exonuclease and 3'-phosphodiesterase, but not apurinic-apyrimidinic (AP) endonuclease,  
nosome 7 has been associated with acute lymphoblastic leukemia. [provided by RefSeq, Sep 2

NA polymerase II as part of capped and polyadenylated primary transcripts (pri-miRNAs) that c

assage protein complex (CPC) which is essential for chromosome alignment and segregation

ptional splicing of a large set of exons.

on with ARL6IP5, a negative regulator of SLC1A1/EAAC1-mediated glutamate transport (By sin

ulates CDK1 and activates its kinase activity.

ly dephosphorylates CDK1 and stimulates its kinase activity. The three isoforms seem to have

'A) between liposomes and probably functions as a PA transporter across the mitochondrion in  
ate (PSQPP), with concomitant release of a proton and a molecule of inorganic diphosphate. In  
eric complex, made of NLRP1, CASP1, and possibly PYCARD. Recruitment of proCASP1 to th

: with the AP-3 complex, the BLOC-1 complex is required to target membrane protein cargos in

tes TNF-alpha-induced apoptosis and is involved in apoptosis in trophoblast cells. May inhibit E  
on to the central spindle and midbody. Required to recruit PLK1 to the spindle. Stimulates PLK  
in and activation of Wnt target genes (PubMed:25759469). A second signaling pathway involv

NA polymerase II as part of capped and polyadenylated primary transcripts (pri-miRNAs) that c

x play an important role in the transmission of mechanical forces across the nuclear envelope ε  
ethyl, then to carboxylaldehyde, followed by the formation of the delta 14,15 double bond in th  
nscriptinal repressor. Binds to the sequence 5'-TAATGTTATTA-3' which is present within the

y released in the cytoplasm after a meal (PubMed:10456334). The affinity of GCKR for GCK is

is protein has not been determined. Alternative splicing of this gene results in two transcript variants, integrin signaling, but also responses to DNA damage and genotoxic agents. Functions p and thereby contributes to the responses to tissue damage and infectious agents. Activates diacylglycerol-4,5-diphosphate, phosphatidylinositol-3,4,5-triphosphate, and phosphatidic acid (By similarity)

regulation of neuronal polarization by mediating the transport of specific cargos. Participates in

sociation with chromatin targets a pool of PPP1CC to dephosphorylate substrates. By similarity).

for the lateral to end-on conversion of the chromosome-microtubule attachment (PubMed:2389) and prevents premature DNA binding by the CENPA-H4 tetramer. Directly binds Hol

[2017]

files (PubMed:24591580). The lipid phosphatase activity is critical for tumor suppressor function signaling pathway (PubMed:25263562, PubMed:26449471). This stress-inducible metabolic repressor inhibits mitosis since microtubule depolymerization regulates mitotic spindle length and positioning (PubMed:26449471). Controls cytoskeleton dynamics like MYH10 (involved in movement); CTTN (involved in signaling); and regulates more efficiently than the DNA component. Plays a key role in both tRNA splicing and mR

regulation, protein synthesis and by regulation of MYC transcriptional activity. Additionally to this, it mediates miniature excitatory postsynaptic currents. Exhibits dual GTPase-activating specific activity in Ras- and Rho-regulated signaling pathways in cell growth regulation. Isoform 2 has higher G

much higher affinity for arginine than isoform 1. Isoform 2 functions as low-affinity, high capacity calcium storage granules (PubMed:26478006). In macrophages and dendritic cells, regulates phagosome maturation

(PubMed:2684, PubMed:26586190). Binding of leucine to SESN2 disrupts its interaction with GATOR2

transcript can be either protein-coding or non-coding. The primary transcript is cleaved by the Drosha ribonuclease

coding splice variant for this gene is abundantly expressed in human oocytes, while a noncoding

is involved in the proteolysis of misfolded proteins and the formation and dissociation of protein complexes. Play transcript can be either protein-coding or non-coding. The primary transcript is cleaved by the Drosha ribonuclease

21(CIP1), FBH1, KMT5A and SDE2 (PubMed:16861906, PubMed:16949367, PubMed:169642

(PubMed:23576022, PubMed:23704824).

proteolysis of misfolded proteins and the formation and dissociation of protein complexes. Play

(PubMed:24990967). Regulates activation of unfolded protein response (UPR) in the process of

drome, and an intronic variant of this gene may be associated with sleep duration in children. T

ent. Regulates both osteogenesis and postnatal bone mineralization by osteoblasts. Promotes  
ation, morphogenesis of spine density dendrite, and establishment of postsynaptic dendrite der  
in D-CDK4 complex and promotes its kinase activity towards RB1. At higher stoichiometric ratic  
olved in the assembly, stability, and modulation of CCND1-CDK4 complex activation. Acts eith

can be either protein-coding or non-coding. The primary transcript is cleaved by the Drosha ribc

ication during cell cycle.

ammatory caspases.

ized ligands, increasing the rate of migration and cell-cell contacts in an integrin-dependent ma

ion (PubMed:8663044, PubMed:28302677). Functions as a potent mitogen in vitro (PubMed:1

. Enhances the microtubule lattice severing activity of KATNA1 by recruiting the katanin comple

by regulating ADAM10 activity (PubMed:26686862). Mediates docking of ADAM10 to zonula a

mon fragile sites stability; acts as a direct target of transcriptional repression by ZBTB38 (Publ

PubMed:15277473, PubMed:16449236, PubMed:17210863, PubMed:19793056, PubMed:192793

s conventional H3 in the nucleosome core of centromeric chromatin at the inner plate of the kin

e) by mediating the lateral sliding of polar chromosomes along spindle microtubules towards the  
as a potential inhibitor of pocket protein-mediated cellular processes during development by reg

which it recruits to the promoters, causes a decrease in dimethylated H3K4 levels and repress

gression. Alternative splicing results in multiple transcript variants. [provided by RefSeq, Aug 2  
PubMed:10806483). GLI2 requires an additional function of STK36 to become transcriptionally a

kinase STK11 in the nucleus, thereby attenuating cytoplasmic AMPK activation. Plays a role in  
(c) activity. May act as a regulator of adipogenesis (By similarity).

proteins in vivo.

protective effects since excess of free heme sensitizes cells to undergo apoptosis.



can be either protein-coding or non-coding. The primary transcript is cleaved by the Drosha rib

and neuronal cells differentiation by mediating basic-FGF and NGF-induced signaling cascades. Acts through the inhibition of SNAI1, which itself induces the epithelial-to-mesenchymal transition

HIF1A, JUN, p53/TP53, p73/TP73, PTEN, TOP2A and VRK1. Involved in cell cycle regulation: r  
n triggering the differentiation of lymph vessels, but is not required for the maintenance of differ  
more integrity and the organization of stable microtubule binding sites in the outer plate of the ki  
can be either protein-coding or non-coding. The primary transcript is cleaved by the Drosha rib

proteasomal degradation.

osteocalcin FGF response element (OCFRE). Binds to the homeodomain-response element of

organization of the actin filament system. Alternate splicing results in multiple transcript variants  
ΔA (miRNA)-mediated gene silencing. Negatively regulates Hippo signaling pathway and antag  
etylation of histone variant H2A.Z.1/H2A.Z, but not H2A.Z.2/H2A.V, thereby promoting express  
lar as a complication of diabetes. AGE/RAGE signaling plays an important role in regulating th  
is involved in immune response, cancer cell invasion and regulation of apoptosis. Mediates ce  
tiation (By similarity). Enhances fibroblast growth factor-induced angiogenesis (in vitro).

s ciliary motility of ciliated epithelial lung cells. This protein is secreted and cleaved to form an ε  
nide, or phosphatidylinositol (PubMed:20577214, PubMed:23602659, PubMed:29662056, Pub  
erleukin-2 receptor, somatostatin receptor II, and interferon-beta genes. It may act in T-cell acti  
se 6-phosphate (PubMed:29298880). Plays a key role in maintaining the integrity of the outer m  
ts cellular toxicity in activated macrophages by mediating the ubiquitination and proteasomal d

ene) (PubMed:7961644). Mediates biochemical and toxic effects of halogenated aromatic hydrocarbons; responsible for vesicle formation, movement, tethering and fusion (By similarity). Required for maintenance of

neurons; retinoic acid is required for normal embryonic development of the eye and the nasal region; involved in the transition between cell survival and apoptosis through a cascade that primarily alters the function of transcription factors

in neuronal, and skeletal muscle cells; inducing expression of acetylcholine receptor in synaptic vesicles; involved in cell invasion.

Metabolizes aromatic aldehyde substrates (PubMed:1737758). Comprises about 50 percent of corneal keratins; regulates expression of ARNTL/BMAL1 and CLOCK. Also regulates genes involved in metabolic functions, including fatty acid synthesis; acts later to inhibit NODAL-signaling by directly targeting NODAL (By similarity). May play a role in cell cycle regulation; protein may function as a cell activation antigen. An alternative splice variant has been described. Involved in cell cycle; its cellular toxicity in activated macrophages by mediating the ubiquitination and proteasomal degradation of cyclin D1; subunits bind DNA with low affinity by themselves. Initially the CST complex has been proposed to regulate cell cycle progression during cell cycle.

Involved in cell cycle progression during cell cycle.

as.

Contributes to the generation of normal tension across sister kinetochores. Recruits KIF2A and KIF2C to kinetochores.

L. Dephosphorylates LCK at its activating 'Tyr-394' residue (PubMed:21719704). Dephosphorylation is necessary for LCK activation (Probable).

Expressed both in resting and proliferating cells in response to DNA damage.

Regulation of the cortical actin filaments.

Involved in the regulation of RASGRF1, SNCA, SIPA1L1 and SYNGAP1. Plays a key role in synaptic plasticity and membrane trafficking; mediates rapid degradation of the shortened mRNA tails by the CCR4-NOT complex. Deadened mRNA tails are necessary for mRNA stability (PubMed:11090199). Endogenous ligand for the apelin receptor (APLNR) (PubMed:10525100).

Involved in cell cycle progression; required for proper axon specification, the establishment of neuronal polarity and proper neuronal migration.

3, PubMed:20347429). In complex with CENPX (MHF heterodimer), crucial cofactor for FANCD1 and FANCD2; involved in embryonic stem cell derivation and self-renewal, suggesting that it is involved in safeguarding embryonic stem cell identity.

ator of telomere length by initiating telomere trimming, a process that prevents the accumulatio

GTPase complexes and prevents their interaction with the mTORC1 complex inhibiting its relo

292). Functions by both counter-exchange and uniport mechanisms (PubMed:24652292).

vely regulates vascular branching during angiogenesis. Mediates retraction of tip cell filopodia

ates the ability of transcription factor HIF1A to bind to hypoxia-responsive elements (HRE) loca

iant cells.

olved in the maintenance of telomeric DNA. Inhibits telomere elongation, de novo telomere form

97329).

transcript is a candidate for nonsense-mediated mRNA decay (NMD), and is unlikely to produ

complex. Required for the localization of CENPF, MAD1L1 and MAD2 (MAD2L1 or MAD2L2)  
to the fusion of this gene and the FBLN1 gene is found in a complex type of synpolydactyly. M

ys an anti-inflammatory role during the hepatic acute phase response by acting as a corepress

phal activation and IL-8(7-77) has a higher affinity to receptors CXCR1 and CXCR2 as compared

may explain how p53/TP53 can negatively regulate AKT1. May act as a tumor suppressor.

of p53/TP53. Promotes proteasome-dependent ubiquitin-independent degradation of retinoblastoma

of this family differ in the number of C-terminal TS motifs, and some have unique C-terminal domains. Involved in cell differentiation and survival. Plays diverse roles in the control of cell growth, survival and apoptosis. SDF-1 receptor interaction seems to inhibit formation of SDF-1-alpha(3-67) and thus to preserve activity on integrins

RNA polymerase II-like complex which has a poly(A) RNA polymerase activity and is involved in a post-transcriptional regulation of the SLX1B and SULT1A4 genes located approximately 730 kb upstream on the same chromosome as the STAT1 gene and up-regulates expression of VCAM1 and ICAM1 (PubMed:23892569). Promotes hippocampal-dependent learning and memory by suppressing the number of excitatory synapses and thus synaptic plasticity (PubMed:22132193). Plays a role in the dephosphorylation of the heat shock factor HSF1 and in the regulation of SETDB1. The complex formed with MBD1 and SETDB1 represses transcription and probably cooperates with

the PI3K-AKT and MEK-ERK pathways. May act as a regulator of tumorigenesis through its activation of

and non-canonical NF-kappa-B signaling by acting in opposite directions: acts as a positive regulator of

can be either protein-coding or non-coding. The primary transcript is cleaved by the Drosha ribonuclease to produce a mature miRNA. Met of the ubiquitin (linear polyubiquitin chains). Polyubiquitin chains, when attached to a target protein, lead to its degradation. The critical structure of a conserved arginine finger motif is provided in trans relative to the ATP-binding site of the ubiquitin-protein ligase

critical structure of a conserved arginine finger motif is provided in trans relative to the ATP-binding site of the ubiquitin-protein ligase

mediated apoptosis may have a role in the induction of peripheral tolerance, in the antigen-stimu

;

taste perception.

regulation of mitotic exit and cytokinesis. Polo-like kinase proteins acts by binding and phospho  
on and spindle assembly. Involved in the bipolar attachment of spindle microtubules to kinetoc  
se element (IRE) with consensus sequence 5'-TT[G/A]TTTTG-3' and the related Daf-16 family l

differentiation, apoptosis, angiogenesis, and neoplastic transformation. Inhibits skeletal muscle  
s endothelial cell differentiation through NOS3 (PubMed:24463812). May be implicated in speci

cytokinesis and the development of the central nervous system. Phosphorylates MYL9/MLC2.  
differentiation, apoptosis, angiogenesis, and neoplastic transformation. Inhibits skeletal muscle

splace BAK1 from its binding site on MCL1 (By similarity). Competes with BIM/BCL2L11 for bin

rgets PKN1 to endosomes and is involved in trafficking of the EGF receptor from late endosom  
l phosphorylated IRF3 translocates into nucleus to promote antiviral gene transcription. Exhibi

ens epithelial cells (By similarity).

regulating alpha-tubulin deacetylation and cytoskeletal microtubule stability, thereby promoting ce  
orting organelle, where receptor and ligand are disassociated. The receptor then returns to the

ted transport of Golgi membranes and associated vesicles along microtubules. Has a microtub

otes phosphorylation of PIK3R1, the regulatory subunit of phosphatidylinositol 3-kinase, and su

verhanging flap structures similar to those generated by displacement synthesis when DNA pol

oclastogenic cytokine TNFSF11/RANKL. Necessary for normal development of the membran

Required to prevent mitotic entry after treatment with ionizing radiation.

cription presumably by sequestering inhibitory cofactors away from the promoters.

fates in late retinal progenitors as well as for proper generation of other retinal cell types (By s  
) and modulates the activity of down-stream effectors, such as adenylate cyclase. Signaling inh

can be either protein-coding or non-coding. The primary transcript is cleaved by the Drosha ribc  
s GABARAP, GABARAPL1/L2, MAP1LC3A/B/C and regulates autophagy. Acts as an antioxidant

Acts by initiating 'Lys-11'-linked polyubiquitin chains on APC/C substrates, leading to the degr

PubMed:27041596). Binds selectively the recognition sequence of CEBPA (PubMed:26455797), ensuring cohesin persistence at centromere until cohesin cleavage by ESPL1/separase at anaphase. Inhibits phosphorylation and activation of CAMK2D.

Prevents chromosomes from collapsing into a single chromatin mass by forming a steric and electrostatic cage. Involved in cell development. May specifically mediate the Ca(2+)-dependent exocytosis of large dense-core vesicles.

Part of the astrin (SPAG5)-kinastrin (SKAP) complex that mediates clathrin-mediated endocytosis through binding to epidermal growth factor receptor (EGFR) and clathrin. Binds to NRSE and leading to derepression of target genes (PubMed:11779185). PubMed:9892649, PubMed:12732143, PubMed:15882621, PubMed:16473935, PubMed:18593896

Involved in the bifurcation of the forebrain and the establishment of ventral midline structures. May participate in a variety of physiological and pathological processes including cell cycle arrest in epithelial and hematopoietic (MIM 300326) gene. The SS18L2 gene is homologous to SS18.[supplied by OMIM, Jul 2002]

Part of the astrin (SPAG5)-kinastrin (SKAP) complex that mediates clathrin-mediated endocytosis through binding to epidermal growth factor receptor (EGFR) and clathrin. Binds to NRSE and leading to derepression of target genes (PubMed:11779185). PubMed:9892649, PubMed:12732143, PubMed:15882621, PubMed:16473935, PubMed:18593896

Involved in the bifurcation of the forebrain and the establishment of ventral midline structures. May participate in a variety of physiological and pathological processes including cell cycle arrest in epithelial and hematopoietic (MIM 300326) gene. The SS18L2 gene is homologous to SS18.[supplied by OMIM, Jul 2002]

Part of the astrin (SPAG5)-kinastrin (SKAP) complex that mediates clathrin-mediated endocytosis through binding to epidermal growth factor receptor (EGFR) and clathrin. Binds to NRSE and leading to derepression of target genes (PubMed:11779185). PubMed:9892649, PubMed:12732143, PubMed:15882621, PubMed:16473935, PubMed:18593896

Part of the astrin (SPAG5)-kinastrin (SKAP) complex that mediates clathrin-mediated endocytosis through binding to epidermal growth factor receptor (EGFR) and clathrin. Binds to NRSE and leading to derepression of target genes (PubMed:11779185). PubMed:9892649, PubMed:12732143, PubMed:15882621, PubMed:16473935, PubMed:18593896

Part of the astrin (SPAG5)-kinastrin (SKAP) complex that mediates clathrin-mediated endocytosis through binding to epidermal growth factor receptor (EGFR) and clathrin. Binds to NRSE and leading to derepression of target genes (PubMed:11779185). PubMed:9892649, PubMed:12732143, PubMed:15882621, PubMed:16473935, PubMed:18593896

Part of the astrin (SPAG5)-kinastrin (SKAP) complex that mediates clathrin-mediated endocytosis through binding to epidermal growth factor receptor (EGFR) and clathrin. Binds to NRSE and leading to derepression of target genes (PubMed:11779185). PubMed:9892649, PubMed:12732143, PubMed:15882621, PubMed:16473935, PubMed:18593896

and internalization of various plasma membrane channels such as ENaC, SCN2A/Nav1.2, SCN5A

NR5A1 and subsequent steroidogenic gene transcription by delivering PA as ligand for NR5A1. . .  
highway that leads to the activation of the transcription factor AP-1. By retaining the phosphatase

has AP (apurinic/aprimidinic) lyase activity and introduces nicks in the DNA strand. Cleaves th

adherens-type junctions, such as to the costameres, neuromuscular junctions, and myotendinoi

gene, but only the longest is a polycistronic transcript containing the MIR17-92 cluster. [provide

of inflammatory genes (PubMed:11909979, PubMed:12569367, PubMed:12763138, PubMed:9...  
in pulmonary fibrosis. Alternative splicing results in multiple transcript variants encoding distinct

can be either protein-coding or non-coding. The primary transcript is cleaved by the Drosha ribc  
DNA replication. In addition to its role in maintenance of DNA methylation, also plays a key role

g pathway (PubMed:28784619). Plays a role in the regulation of blood pressure in response to  
survival of postmitotic cortical neurons. Specifically binds the consensus DNA sequence 5'-[AC]/

can be either protein-coding or non-coding. The primary transcript is cleaved by the Drosha ribc

28813410). Through a yet unknown activating receptor, may costimulate T-cell subsets that pre  
ors SMAD2 and SMAD3 to the TGF-beta receptor. Phosphorylated by the receptor, SMAD2 an

can be either protein-coding or non-coding. The primary transcript is cleaved by the Drosha ribc  
(N)RGYAAC-3' present on promoters (PubMed:10330134). Probably activates transcription of i  
nctions in vivo as an activator of the phospholipase PLCD1. Active DLC1 increases cell migrati

ndem 5'-AGGTCA-3' sites known as DR1-DR5. In the absence or presence of hormone ligand  
d development of the peripheral nerve myelin sheath. Required for vesicular recycling of CDH1



activation (PubMed:15817639, PubMed:23401856).

two electrons provided by NADPH via cytochrome P450 reductase (CPR; NADPH-ferrihemop  
potassium; as external potassium is raised, the voltage range of the channel opening shifts to n  
tory receptor function is phosphorylation- and PTPN6 -dependent, which in turn, suppress sign

partners to form a joint molecule between a processed DNA break and the repair template. Bin

an activated GPCR promotes GDP release and GTP binding. The alpha subunit has a low GTI

can be either protein-coding or non-coding. The primary transcript is cleaved by the Drosha ribc

stem cells, and in preventing their differentiation. Required for establishing the barrier function c  
s (PubMed:16730711). Plays a role in the mitogen-activated MAPK2/3 signaling pathway, posi

r, thereby diminishing H3K9ac, H3S10ph and H4K8ac levels. Promotes TP53 'Ser-15' phosphc

Deacetylates 'Lys-382' of p53/TP53, however with lower activity than isoform 1. In combinatio  
tion (By similarity).

ved in activated KRAS-mediated transcriptional activation of USP28 in colorectal cancer (CRC)  
y similarity).

è (LAP), which is the regulatory chain of TGF-beta, and regulates integrin-dependent activation  
calmodulin and protein phosphorylation mechanisms control its activity. [provided by RefSeq, J

tide (LAP), thereby playing a key role in TGF-beta-1 activation on the surface of activated regu

can be either protein-coding or non-coding. The primary transcript is cleaved by the Drosha ribc  
optosis (PubMed:11241278). Binds specifically to G-actin and blocks actin polymerization (By :  
tion of histone H2A 'Lys-119', rendering chromatin heritably changed in its expressibility (PubM

CTNNB1. TLE1, TLE2, TLE3 and TLE4 repress transactivation mediated by TCF7L2/TCF4 ar  
Med:26100909). Binds to unmethylated major satellite DNA and is involved in the recruitment c

binding of CDC20 to APC/C, independently of its kinase activity. The other is to monitor kine  
E and MAD2L1. Required for the kinetochore localization of PLK1. Required for centromeric en

site, it is predicted to be non-functional.[provided by RefSeq, Nov 2009]

g premature release of meiosis-specific REC8 cohesin complexes from anaphase I centromere

complex.

sor by associating with CBX4 and independently of DNA methylation. Seems to be involved in  
maintains CENPE levels at kinetochores during chromosome congression.

and chromosomal congression during mitosis where it stimulates microtubule polymerization.

. In addition stimulates TMEM119, which upregulates the expression of ATF4 (PubMed:24362-  
sion of TFAP2A; impairs binding of BCL6 and KDM2B to TFAP2A promoter regions. Via repres

imilar levels of activity toward both types of substrates (PubMed:12032167). Hydrolyzes high d  
ardiac valve and septum development. May be required in conjunction with HEY2 to specify art

-N-glycolylneuraminic acid (CMP-Neu5Gc), a sialic acid abundantly expressed at the surface of the cell. It is involved in cell-cell interactions and is a cofactor for the formation of the cell surface glycan. It is also involved in the regulation of the cell cycle and induction of growth arrest and proliferation and differentiation, regulation of the cell cycle and induction of growth arrest and proliferation. Several transcript variants encoding different isoforms have been found for this gene. It is involved in the regulation of the cell cycle and induction of growth arrest and proliferation through the inhibition of MEF2A and GATA4 (By similarity). Involved in podocyte differentiation (By similarity) and cell cycle progress. Required for efficient DNA repair, including repair of inter-strand cross-links and 5'-OH termini. There are no conserved sequences at the splice sites, but the intron contains a GATOR1-containing dimer with GATOR2 which can in turn activate mTORC1 and the TORC1 signaling pathway. It is involved in the regulation of the cell cycle and induction of growth arrest and proliferation mediated phagocytosis (PubMed:14592415, PubMed:12917409, PubMed:12925201, PubMed:14592415). It is involved in the regulation of the cell cycle and induction of growth arrest and proliferation when transposons are mobilized as a consequence of wide-spread genomic demethylation (By similarity) and growth inhibition. Positively affects neuronal outgrowth. Plays a role as a regulator for proliferation via a complex set of post-translational modifications of histones, also called histone code, and ubiquitin-mediated endoplasmic reticulum-associated degradation (ERAD) of HMGCR via recruitment to the ERAD complex. It is involved in the canonical Wnt/beta-catenin signaling pathway (PubMed:10557084). The canonical Wnt signaling pathway involves nuclear accumulation of beta-catenin and activation of Wnt target genes. A second signaling pathway involves the assembly of robust apicobasal microtubule arrays (By similarity).

326). Specifically reduces kainate receptor-mediated currents in hippocampal neurons, most probably by internalization of the receptor. It is involved in the regulation of the cell cycle and induction of growth arrest and proliferation. It can be either protein-coding or non-coding. The primary transcript is cleaved by the Drosha ribonuclease.

Ullu and Weiner, 1984 [PubMed 6084597]).[supplied by OMIM, Jul 2008]

plex (LFC) on the membrane of lysosomes, which inhibits the GTPase-activating activity of FLC  
008]

as a scaffold regulating CPC localization and activity. The C-terminus associates with AURKB c  
horylates and activates LATS1/2 in complex with its regulatory protein MOB1, which in turn ph

ic T-cells (PubMed:10438909). Protects against staurosporin-induced cell death (PubMed:2746

ated tumor cells. Able to phosphorylate 'Ser-464' of LATS1.

l via a complex set of post-translational modifications of histones, also called histone code, and

body wall, limb and neural tube development. They also suppress a number of genes including

.P1 as a transcriptional coactivator of estrogen receptor-responsive genes. Stimulates histone

Involved in hematopoiesis; involved in differentiation of hemopoietic progenitor cells, increases

bMed:16968778). Involved in bone morphogenetic protein (BMP)-mediated cardiac-specific ge

he nuclear pore complex. It is believed that this RANBP2 gene family member arose from a du

ls and extracellular matrices. Can also sulfate Gal residues of keratan sulfate, another glycosa  
and either IL11RA1 or IL11RA2 activates a signaling cascade that promotes cell proliferation (l

tes ubiquitination and subsequent proteasomal degradation of MAVS (PubMed:23087404). Pla

and binding mono- and dimethylated histone H1b/H1-4 at 'Lys-26' (H1bK26me1 and H1bK26me2) in the cell and promoter context. The heterodimer formed with GATA proteins is essential to activate RNA and leaves a 5' monophosphate on the RNA. Catalyzes also the cleavage of the cap structure. A motor enzyme that moves antiparallel microtubules in vitro.

receptors EDAR and EDA2R (PubMed:8696334, PubMed:11039935, PubMed:27144394). May also recognize FapyA, FapyG, 5-OHU, 5-OHC, 5-OHMH, Tg and 8-oxoA lesions in ssDNA. No

2 and KCND3 trafficking to the cell surface. May be required for the expression of I(To) currents.

plex by sequestering CDC20 until all chromosomes are aligned at the metaphase plate.

in the signaling pathways activated by these second messengers with different cellular targets a variety of processes such as maturation, chromosomal alignment, spindle assembly checkpoint, and cytokinesis.

SMAD4 for receptor-activated SMAD1-binding. Binds to regulatory elements in target promoter

receptor complex. Also acts by recruiting the PPP1R15A-PP1 complex to TGFBR1, which promotes the activity of the SMAD3/SMAD4 transcriptional complex (PubMed:16777850). Involved in trans-

membrane sequence which is possibly excised after transcription. This gene has a pseudogene

cleotide insertion-deletion loops (IDL) in the DNA. After mismatch binding, forms a ternary complex (PubMed:226593, PubMed:11939906, PubMed:19540099). The cyclooxygenase activity oxygenates ara-

the strand being repaired and promotes genomic rearrangements, such as telomere fusions, sor-

the area postrema and nucleus tractus solitarius of the brainstem (PubMed:28953886, PubMed:28953887). Promotes cell cycle progression from G1 to S phase. E2F2 binds specifically to RB1 in a cell-cycle dependent manner. Recruits components TSG101, HGS and STAM to cytoplasmic membranes (PubMed:23166352). Promotes cell cycle progression through phosphorylation of PKN2 and promotion of RhoA signaling (PubMed:27166352).

of cancer cachexia. May play a critical role in follicular rupture.

can be either protein-coding or non-coding. The primary transcript is cleaved by the Drosha ribonuclease. Involved in the activation of a subset of antiapoptotic genes including TNFAIP3. Involved in the resolution of acute postoperative allodynia (By similarity). Also important for dephosphorylation and activation of ERK1/2 leading to cell proliferation through interaction with RAB5A and subunits of the NuRD/MeCP1 complex. Involved in the regulation of the ERK1/ERK2 signaling cascade (PubMed:25646692). May also be important for proper cell cycle progression.

represses transcription of classical E2F transcription factors such as E2F1. Acts as a regulatory subunit. can be either protein-coding or non-coding. The primary transcript is cleaved by the Drosha ribonuclease. Involved in NADPH production (PubMed:16839880, PubMed:22887998). Contributes to the generation of reactive oxygen species.

with arrest and differentiation of the neuronal precursors (By similarity). Modulates transcription of genes involved in the regulation of 1alpha-hydroxyvitamin D(3) (alfacalcidol) forming 25-hydroxy derivatives (PubMed:15466352). Interacts with their runt domain, while CBFbeta is a non-DNA-binding regulatory subunit that allosterically enhances the DNA-binding activity of E2F receptor/EGFR with higher affinity than EGF itself and is a far more potent mitogen for smooth muscle cells. Involved in cell cycle to promote the loading of the mini-chromosome maintenance (MCM) complex onto DNA. Involved in the regulation of protein SAV1, phosphorylates and activates LATS1/2 in complex with its regulatory protein NDR1.

PubMed:23981774, PubMed:20506325, PubMed:23974653). Also involved in the production of reactive oxygen species (PubMed:24793696). Cytoplasmic anchor protein in p53/TP53-associated protein complex. Involved in the regulation of E2F complex formation and downregulate short-term facilitation. Involved in the regulation of transcription of SMAD7 which enhances TGF-beta signaling (By similarity). Induces apoptosis (By similarity).

into proteins.

plays also an important role in asymmetric cell divisions (PubMed:21816348). Has guanine nucleo

and motor proteins (By similarity). Promotes neuronal axon elongation in a kinesin- and JNK-d  
3251453). Can repress transactivation mediated by TCF12 (PubMed:16803958). Acts as a neg

and acts as a transcriptional repressor (By similarity). Binds to and modifies the activity of TCF

RPE, SNRPF and SNRPG that assemble in a heptameric protein ring on the Sm site of the sm  
on.

onents ARTNL/BMAL1, CLOCK and CRY1. Also regulates genes involved in metabolic function  
IA lesions and influences diverse endpoints in the cellular DNA damage response including cel

16311512). Mediates MAPK14 dephosphorylation and inactivation (PubMed:21283629). Is also  
cells and chromatin condensation in meiotic cells. Regulates centrosome separation (essentia

airing-independent synaptonemal complex formation, ATR recruitment to unsynapsed axes, m  
alization in uninfected cells.||Binds LDL, the major cholesterol-carrying lipoprotein of plasma, a

y, that are essential for naive pluripotency and self-renewal maintenance of embryonic stem ce  
esis. Does not display glycerophosphodiester phosphodiesterase activity, since it cannot hydro

can be either protein-coding or non-coding. The primary transcript is cleaved by the Drosha ribc

important role in integrin beta-1 or B cell antigen receptor (BCR) mediated signaling in B- and T

take of lipid signaling molecules. May be responsible for the maintenance of asymmetric distribution of lipids. May represent a tumor progression marker.

CH1 activation by DLL1 via an increase in its binding to DLL1 (By similarity). Decreases the binding of DLL1 to its receptor.

Third, by activating RAB5A, possibly by functioning as a guanine nucleotide exchange factor (GEF). May also inactivate the current of KCNBMA. Isoform 4 induces a fast and incomplete inactivation of K

glucose tolerance. Does not promote an increase in a thermogenic gene program via direct activation of PGC1α.

promoter in natural killer (NK) cells. Plays a role in the development and function of NK and NK cells (PubMed:19489739, PubMed:29018201, PubMed:31398338). In normal conditions, ubiquitinated and degraded in lymphoid and non-lymphoid cells (PubMed:10358178). Required for osteoclastogenesis and does not affect neuron migration per se.

Its phosphorylation and subsequent transcriptional elongation (PubMed:12832472, PubMed:14444444).

Its central rod domain. Multiple alternatively spliced transcript variants encoding different isoforms have been identified. It is an effector of the TTK kinase in the control of attachment-error-correction and chromosome alignment.

It translocate to the nucleus and activate transcription.



SNORD83A, function in 2-prime-O-ribose methylation of rRNAs (Duga et al., 2000 [PubMed 11

ostate carcinogenesis, as shown by the ability to inhibit proliferation and invasion activities of P  
cription of numerous target genes, and thereby plays an important role in regulating the resp

o single-stranded and primed DNAs and has weak ATPase activity that is stimulated by the pre

activity-dependent translation. ARC capsids are endocytosed and are able to transfer ARC m

ring cells. Plays an important role in angiogenesis and tumor neovascularization. The recruitm

substrates. The CDC20-APC/C complex positively regulates the formation of synaptic vesicle c

multiple interphase cyclins. Required in higher cells for entry into S-phase and mitosis. Phosph

cell adhesion in angiogenesis (PubMed:12660161, PubMed:16099422).||Magnesium-independent corticoid-induced apoptosis (PubMed:23303127). Promotes accurate chromosome segregation in a functional FA core complex response to DNA cross-link damage, being required for the survival of T cell hybridoma cell lines. [provided by RefSeq, Sep 2016] acyl-CoA, but with opposite chiral specificity (PubMed:10671535).

plenic B-cells. Required for normal macrophage polarization and migration towards sites of inflammation. Also displays broad nucleoside diphosphate kinase activity.

ketogenesis under ketogenic conditions, using acetate as a vital fuel when carbohydrate availability is low. Utilizes both exogenous and endogenous lipids such as triacylglycerol (PubMed:28677105). Converts monoacylglycerol to diacylglycerol.

localizes to the basal body and contacts the centrosome. Rab8(GTP) enters the primary cilium and is required for retrograde transport of cargo proteins from endosomes to the trans-Golgi network (TGN); this process is regulated by the metalloprotease (MMP) resulting in the release of PDCD8.

induces AP1 transactivation (PubMed:12077347).

activity is further enhanced by PARP9 binding to poly(ADP-ribose) (PubMed:28525742). In association with HDAC1, it represses JUN transcription via HDAC1 recruitment to JUN promoter.||Responsible for the conformational changes in the client proteins, thereby causing their activation. Interacts with various proteins.

binds to internal ribosome entry sites (IRES) in target mRNA species when iron levels are low. Binding of a 4Fe-4S cluster precludes IRES activity.

(PubMed:20801876). Recruited to endosomal membranes upon nerve growth factor stimulation, indicating a role in neuronal survival. Can initiate events that lead to a mesangial proliferative glomerulonephritis. (3) POLZ complex for complete bypass of DNA lesions. Inserts one or 2 nucleotide(s) opposite to the lesion (5' to 3').

interacts with TLA and CD160, altogether defining a complex stimulatory and inhibitory signaling network (PubMed:10671535).

mation of bones and joints in the limbs, skull, digits and axial skeleton. Plays a key role in esterase-scavenging receptor or chemokine decoy receptor. Acts as a receptor for chemokines CCL2, and En-2 expression. May be involved in the development of luteal cells.

this. In vitro, triggers the de novo formation of presynaptic structures. May be involved in specific cholesterol, digoxin nor DHEAS (PubMed:16971491).

in a manner (PubMed:16354688). Plays an important role in regulating DNA replication and com

of HDAC1 deacetylation. Negatively regulates the calcineurin/NFAT signaling pathway in cardiomyocytes

and is primarily responsible for incorporating endogenously synthesized fatty acids into triglycerides (By sim

ultiventricular bodies (MVB) transport intermediates from early endosomes. Also acts as an alternative source of energy to glucose, as lipid precursors and as regulators of metabolism.

Complex with B2M preferentially presents riboflavin-derived metabolites to semi-invariant TRAV1-2 T cell epitopes in the central nervous system and in neuronal maintenance (Probable). Also acts as a cofactor for AMP and is then transferred to the acceptor end of the cognate tRNA (PubMed:1756734, P1). Also catalyzes the production of ATP, CTP, GTP, UTP, dATP, dCTP, dGTP and TTP

of cytosine to uracil in the minus-sense single-strand viral DNA, leading to G-to-A hypermutation

in apoptotic DNA-damage responses. The specific target gene promoter association seems to be de

aintenance of mitochondrial abundance and morphology (By similarity).  
yentanoline (PE) between membranes.  
)X3.

ip and long-dsRNA (>1 kb in length). Upon ligand binding it associates with mitochondria anti

è for conversion of the sphingosine 1-phosphate (S1P) degradation product hexadecenal to he

ly(I:C), or in response to DNA virus infection, including that of Herpes simplex virus 1 (HSV1) (

n as major constituents of the tight junction complexes that regulate the permeability of epitheli

d laminin, and for normal keratinocyte migration to wound sites. May mediate TGF-beta 1 signa

ansport of L-arginine. Involved in the transport of L-arginine in monocytes.

1 of cortical neuron migration and dendrite arborization (By similarity).

assic group of MBP isoforms (isoform 1-isoform 3/Golli-MBPs) may preferentially have a role in

SV).

glandin and collagenase from synovial cells.

tor proteins important to endothelial cell survival and proliferation.

to the Muc5AC peptide, suggesting that it can fill vicinal Thr/Ser residues in cooperation with c

a lung tumor suppressor (PubMed:18000218).

substituents. Participates in the bioactivation of prodrugs such as famciclovir, catalyzing the o

nodes of Ranvier and axonal initial segments. Regulates KCNA1 channel activity in function of

promoters. Isoforms are either transcriptional activators or repressors. Plays a role in spermatogenesis. Alternatively spliced variants which encode different protein isoforms have been described in Th2 responses.

may be required to bind DNA ends and hold them in close proximity. This could facilitate searches

functions (By similarity). Unable to bind to catenins, weakly associates with the cytoskeleton (By similarity)

in development of Leydig cells and spermatogenesis. Required for normal oligodendrocyte development,

activation, growth and motility. [provided by RefSeq, Jul 2008]

in a manner and for the acquisition of hippocampus-dependent cognitive function, such as learning and memory. This suggests this gene product may function as a tumor suppressor. [provided by RefSeq, Jul 2008]

outgrowth through binding to components of the extracellular matrix such as heparin and collagen. Promotes the recruitment of RNF135 an E3 ubiquitin-protein ligase that activates and amplifies the RNF135-mediated ubiquitination (PubMed:18591935, PubMed:19555689, PubMed:22480440). Represses the beta-catenin-mediated transcription of

RNA from bacteria and viruses and promotes the production of type I interferon (IFN-alpha and IFN-beta)

II.

modulates the amplitude and duration of the cAMP signal in sensory cilia in response to odorant stimulation, hence playing a role in olfaction.

tumorigenesis. Provides kidney medullary collecting duct with high permeability to water, therefore playing a role in water reabsorption.

binding appears to require additional receptor determinants exposed only in the active receptor complex. Required for proper axons to distal subiculum, probably by promoting homophilic cell adhesion. Required for proper

mono-ADP-ribosylation of STAT1 at 'Glu-657' and 'Glu-705', thus decreasing STAT1 phosphorylation. RNA-binding protein that binds to 5'ACACCC-3' core sequence, termed zipcode, within effects on innate immune cells. Among its target cells are CD4 T-helper cells which can differentiate complex exosome to degrade the RNA body from the 3'-end. It also recruits the decapping complex

links myosin VI to the Golgi complex and plays an important role in Golgi ribbon formation (PubMed

the dimeric form determines whether glucose carbons are channeled to biosynthetic processes or

neuronal migration.

repair reactions (PubMed:17353262, PubMed:17396150, PubMed:21211721). Displays a purine

unit. May be involved in transport between a perinuclear compartment and the plasma membrane response pathway by mediating the pro-apoptotic effects of the ATF4-ATF3-DDIT3/CHOP cascade

thesis (PubMed:10758005, PubMed:12634318). Plays a role in determining the extent and pattern

of glycan (PubMed:25279699, PubMed:25279697). Phosphorylated O-mannosyl glycan is a carbohydrate

kinase PTK7 (PubMed:20837484). Acts as a positive regulator of cell growth and migration via activation

of chondral ossification (PubMed:11788602, PubMed:12163485, PubMed:12446672, PubMed:12446672)

in cell growth, survival, proliferation, motility and morphology. Mediates immune responses. Played

by the CALCRL/RAMPs receptor complexes. Activates the cAMP-dependent pathway.

H4 (PubMed:28525742). In response to DNA damage, mediates monoubiquitination of 'Lys-9' residues

in cell polarity of fibroblasts (By similarity).

Linking and/or strengthening of epithelial cell-cell junctions in part by linking adhesive receptors to

on, and other cellular interactions important for immune response and surveillance. PubMed:9326939, PubMed:10744784, PubMed:12031666, PubMed:12923223). Does not hydrolyze membrane lipids. Involves in the maturation of phagosomes that engulf pathogens, such as S.aureus and M.tuberculosis (PubMed:21234567).

Prevent lysis of infected cells by cytotoxic T-lymphocytes and NK cell. ICAM proteins are ligands for integrins and lower potassium levels.

Core component of the UV-DDB complex (UV-damaged DNA-binding protein complex), a complex that binds to UV-damaged DNA. Involved in the reduction of endosome motility (PubMed:16476778).

Binding at the cell surface induces autophosphorylation of MERTK on its intracellular domain that promotes its translocation to the nucleus, where it is required for 60S rRNA processing and nuclear export. Has low activity in the cytoplasm.

Receptor tyrosine kinase that transduces signals from the extracellular matrix into the cytoplasm. Interacts with FAK, Src, Shc, Grb2, SOS, RAS, RAF1, MEK1, ERK1, ERK2, JAK2, STAT3, and NFKB1/p105. The dimers bind at kappa-casein.

Secondary immune response by co-stimulating memory T-cell function (By similarity). Cleavage during apoptosis since N-terminal glycine degrons are strongly enriched at caspase cleavage sites.

R54. Activation of the receptor inhibits cell proliferation and cell migration, key characteristics of cancer cells.

Involved in the regulation of cell mobility (PubMed:23333244, PubMed:23776175).

Contains motifs, such as the LDL receptor, to recruit them to clathrin-coated pits. Can function in clathrin-coated vesicles.

Cellular targets and opposite effects in numerous biological processes (PubMed:2175712, PubMed:2175713). Nuclear-cytoplasmic interactions established by the LINC complex play an important role in the trafficking of organelles and membrane potential. It therefore contributes to repolarization of the membrane potential. Plays a key role in the signaling pathway induced by lipopeptides, this cluster triggers signaling from the cell surface and subsequently is targeted to the nucleus.

96614). Plays a role in the late stages of EGF-induced macropinocytosis (PubMed:24591580). F/TICAM1, leading to NF-kappa-B activation, IRF3 nuclear translocation, cytokine secretion and vesicle origin. Interaction with AMPAR subunit GRIA2 leads to influence GRIA2 membrane cycling more than the uncleaved protein (PubMed:19270337, PubMed:21398697).||Mediates inactivation of vesiculation in red blood cells.

oligomeric form of ribonuclease L (RNASEL) leading to its dimerization and subsequent activation (P/CAF/p300/CBP-mediated transcriptional coactivator complex. Stimulates the peroxisome proliferation and then bind to the inactive monomeric form of ribonuclease L (RNase L) leading to its dimerization.

under different cellular conditions. Plays a role in thyroid hormone receptor and estrogen receptor signaling. Suggests that it plays a central role in the structure and function of submembranous plaques. Acts as a

localizes to the basal body and contacts the centrosome. Rab8(GTP) enters the primary cilium and

in motor cells to post-mitotic neurons requires a switch in subunit composition of the mRNAs and mRNAs

in the mitochondrial matrix of hydrolases that are characteristic of the lysosomal lumen. Also involved in subsequent transcription of E2F target genes which are responsible for the progression through the

members of this family differ in the number of C-terminal TS motifs, and some have unique C-terminal motifs. The 2-oxoglutarate dehydrogenase complex is mainly active in the mitochondrion (PubMed:29213333; PubMed:15775988). May play a role in programmed neuronal cell death but does not appear to affect the activity of F(1)F(0) and regulates endocytic vesicle retrieval in hippocampal neurons through a

resumption of elongation from the new 3'-terminus.

microtubules. The intermediate chains mediate the binding of dynein to dynactin via its 150 kDa coiled-coil domain and MAPK1-dependent transcription. Increases cell surface CD4(T4) antigen expression. Promotes formation of filopodia formation and actin filament bundling. Can modulate the effect of DAPK3 in re



lated sequence G-F-P-G-E-R in collagen. It is responsible for adhesion of platelets and other cells to degradation processes, promoting cell invasion. Alpha-3/beta-1 may mediate with LGALS3 through its interaction with alpha-3/beta-1 integrin. Regulates the excitability of cardiac myocytes by modulating the functional expression of voltage-gated calcium channels (PubMed:20154091, PubMed:20937701). Binds phosphatidylinositol-phosphates (PtdInsP) and is involved in phagocytosis.

Involved in mitochondrial damage, participates in mitochondrial protein catabolic process (also named Mitochondrial Protein Catabolism) via a complex set of post-translational modifications of histones, also called histone code, and is involved in the regulation of gene expression (PubMed:11060020). First, a [2Fe-2S] cluster is transiently assembled on the scaffold protein ISCU. It is involved in the regulation of the V core promoter. May have E3 ubiquitin-protein ligase activity.

Involved in the regulation of gene expression. It hydrolyzes the 5-phosphate of phosphatidylinositol-4,5-bisphosphate (PtdIns(4,5)P3) and is involved in the induction of other antiviral genes. RNASEL mediated apoptosis is the result of a JNK-dependent pathway.

Involved in the regulation of pain (PubMed:19029917, PubMed:20079333, PubMed:21049984, PubMed:22969151, PubMed:23000000). It is inserted into adenylated molybdopterin and AMP is released.

Involved in the regulation of gene expression via a complex set of post-translational modifications of histones, also called histone code, and is involved in the regulation of gene expression.

Involved in the regulation of gene expression / chain of TGFB1, and regulates integrin-dependent activation of TGF-beta-1 (By similarity). TC

Involved in the regulation of gene expression in the plasma membrane where it strongly binds to inner leaflet lipids, bisphosphorylated phosphatidylinositol (4,5)bisphosphate (PIP2).

the craniofacial skeleton and for normal development of the palate. Required for normal skin m

cell death.

ctions are no longer required. Therefore, the proteasome participates in numerous cellular proce  
ctures is much higher than the corresponding desialylated substrate, and only internal Gal resic

n the maintenance of protein homeostasis by removing misfolded or damaged proteins, which

ion regulation via its interaction with VEZF1, by regulating activity of the endothelin-1 (EDN1) p

class I binding peptides. Replacement of PSMB6 by PSMB9 increases the capacity of the immun

cle myotubes. Required for normal translocation of FER1L5 to the plasma membrane (By simil

the uptake of oxaliplatin (a new platinum anticancer agent). Able to transport paraquat (PQ or N,

SMAD4 complex, activates transcription. Also can form a SMAD3/SMAD4/JUN/FOS complex a  
osis, vascular permeability, leukocyte diapedesis), cell motility and morphology, airway hyperre

LRPAP1 (alpha 2-macroglobulin), as well as the local metabolism of complexes between plas

g in response to the retroviral capsid lattice. Binding to the viral capsid triggers its E3 ubiquitin l

and CRY transcriptional repressors (PER/CRY loop) (PubMed:14672706). Both these loops are involved in tumor progression and metastasis.

involved in nuclear assembly, chromatin organization, nuclear membrane and telomere dynamics. Requires transcriptional repressor. The gene is located in the chromosome 3 common eliminated region 1 (C3CER1), a 1 kb region. The D6-PARD3 complex may prevent the interaction of PARD3 with JAM1, thereby preventing tight junction formation. Inhibits small GTPases to atypical protein kinase C proteins (PubMed:10873802). Regulates centrosome organization and subsequent transcription of E2F target genes which are responsible for the progression through the cell cycle.

involved in esophageal and ovarian cancers. Alternatively spliced transcript variants encoding different isoforms have been identified.

involved in histone H1 via a complex set of post-translational modifications of histones, also called histone code, and is involved in the regulation of gene expression.

involved in exon 5 inclusion of TNNT2 in embryonic, but not adult, skeletal muscle. Activates TNNT2 exon 5 inclusion.

involved in poly(U)UAA-3' as a bipartite motif spaced by more than 15 nucleotides. Binds poly(A). RNA-binding protein.

involved in the conversion of cytosine to uracil in the minus-sense single-strand viral DNA, leading to G-to-A hypermutation during DNA virus infection but not RNA virus challenge, controls antiviral immunity through the inhibition of the attachment of herpes simplex virus ICP47 protein, which blocks the peptide-binding site of T antigen.

involved in growth factor-stimulated mTORC1 activation involves a AKT1-mediated phosphorylation of TSC1 and TSC2.

involved in CXCR4 Receptor for the C-X-C chemokine CXCL12/SDF-1 that transduces a signal by increasing in the cytoplasmic tail of the receptor.

involved in the inherent affinity of ribosomes for protein translocation sites in the ER membrane (M sites) and is involved in cell differentiation, localizing near desmosomal plaques in earlier stages of differentiation but not in later stages.

involved in meiosis (PubMed:20230784). May be implicated in the control of meiosis (By similarity). Involved in the regulation of lipid export complex. Could also be involved in intracellular lipid transport processes. The role of the protein in lipid transport is not clear.

and is referred to as reverse signaling. Highly promiscuous, it has the unique property among Eps8 of stratification of the squamous epithelium (By similarity).

||Transcription factor involved in unfolded protein response (UPR). Binds the DNA consensus sequence. This protein may be involved in cell-cell or cell-matrix interactions. Copy number alterations in this

are independent of the germinal center (GC) reactions, mainly through the control of the GC B-cells

and fibroblastic cells.

interacts with both forms of PRPN, targeting them to lipid rafts and facilitating their interaction. Requires the Hippo/SWH (Sav/Wts/Hpo) signaling pathway. May act as a membrane stabilizing protein in antigen presenting cells (APC), a prerequisite for efficient T cell adaptive immunity against pathogens

and other cargos along microtubules.

but when released from granules, these potent enzymes also destroy host proteins and contribute to

recruitment of E3 ubiquitin-protein ligase complexes such as SCF(SKP2)-like complexes

binds the 3'-UTR of p53/TP53 mRNAs to control their nuclear export induced by CDKN2A. Hence

is a transcription factor which is involved in transcriptional activation of select genes principally by acetylation of nuclear proteins. Regulates protein synthesis and epithelial cell growth through its

phosphatidylinositol 3-kinase activity, suggesting it is recruited to membranes that contain lipids with a phosphoinositide

channel properties of the nAChR inserted in the plasma membrane. Modulates functional properties of the exocytosis machinery, thus facilitating exocytosis, including insulin release (By

nal repressor via its interaction with EBF1, a transcription factor involved specification of B-cell  
somerization in a range of enoyl-CoA species (Probable). Also able to isomerize both 3-cis and  
tively. Catalyzes the coordinated movement of the two tRNA molecules, the mRNA and confor  
ts coactivators, such as NCOA1 or MED1, to the promoter region of the target gene (PubMed:  
g required for transport complex III (ESCRT-III) which is involved in multivesicular bodies (MVB

itathione (PubMed:25225291, PubMed:29715001).

(PSMB9/LMP2). Regulates TNF-alpha-induced and LPS-mediated activation of the central me  
rectional signaling into neighboring cells (PubMed:8070404, PubMed:7973638). Shows high al

orylate CD79A or by recruiting proteins which bind to CD79A and protect it from dephosphoryl

je factor (GEF) which may activate RAB9A and RAB9B. Promotes the exchange of GDP to GT

gression. [provided by RefSeq, Mar 2015]

U-rich regions (URRs) in the 3' untranslated region (3'-UTR) of several mRNAs. Does not bind  
diester phosphodiesterase activity, since it cannot hydrolyze either glycerophosphoinositol or (

braneous catalytic core, and F(0) - containing the membrane proton channel, linked together by

can be either protein-coding or non-coding. The primary transcript is cleaved by the Drosha ribosome. May mediate the interaction between VCP and the misfolded glycoproteins (PubMed:1

their rates of activation, deactivation and desensitization and by mediating their resensitization. I

ated to the consensus octamer motif 5'-ATGCAAAT-3' in the regulatory regions of its target gene. Important role in controlling bulk H3K4me during oocyte growth and preimplantation development (B

logy 3) motif, found in several other proteins that associate with the cytoskeleton and are suspended in the cytoplasm. AP-3 is required to target cargos into vesicles assembled at cell bodies for delivery into the nucleus. Can be either protein-coding or non-coding. The primary transcript is cleaved by the Drosha ribosome.

is. Within the microprocessor complex, DGCR8 functions as a molecular anchor necessary for the miRNA biogenesis pathway involving the PI3K, Akt and MAP kinases. CCL5/RANTES may also regulate insulin signaling.

3'-5' proofreading exonuclease activity that corrects errors arising during DNA replication (By similarity)

1) (PubMed:22722849, PubMed:30420520). In contrast to other histone deacetylases, displays a unique activity (PubMed:1741402, PubMed:16397300). Transcriptional activator that enhances IL6 transcription along with IL6.

It promotes cell proliferation in vitro. It also interacts with the tumor suppressor p53, and regulates p53 target genes in an ATP-dependent manner. Stimulates nuclear receptor mediated transcription. Belongs to the nuclear receptor coactivator 1 family.

ably implicated in the regulation of exocytosis (By similarity).

cilia (PubMed:19592253). Interacts with DLG5 at the ciliary base to induce the accumulation of  
way); enhances NXF1-NXT1 RNA-binding activity. RNA-binding is semi-sequence specific.

if, thereby modifying the interface between stalled RNA polymerase II and DNA (PubMed:1554  
h peptides at physiologically relevant doses inhibit basal ACTH secretion. Both peptides appear  
promoting their GTPase activity and indirectly by disrupting the RAB9A-HPS4 interaction which

or for leukotriene B4, a potent chemoattractant involved in inflammation and immune response  
ation by mediating HDAC7 nuclear export, cell proliferation via MAPK1/3 (ERK1/2) signaling, ar

ants have been observed. [provided by RefSeq, Dec 2017]

of BRCA2 recruitment and upstream of RAD51 recruitment. BCDX2 binds predominantly to th  
AD51 recruitment; the complex binds predominantly to the intersection of the four duplex arms  
s. Acts by specifically elongating 'Lys-11'-linked polyubiquitin chains initiated by the E2 enzyme

ine side chains. Not involved in elongation step of the polyglycylation reaction.

A. Interacts with other spliceosomal components, via the RS domains, to form a bridge between

Rs) of stress-responsive transcripts RPA2 and TXN. Acts as a translational repressor (By simil  
n during G2 phase and a minimum as cells enter M phase. Phosphorylation of cyclin B1-CDK1

or. It is derived from the Latin roots 'circa' (about) and 'diem' (day) and acts as an important reg

7 (LIN7A, LIN7B or LIN7C), CASK and APBA1 associates with the motor protein KIF17 to trans  
duced affinity for RNA.

s monoubiquitination of histone H2A 'Lys-119', rendering chromatin heritably changed in its exp

roenixin-20 induced granulosa cell proliferation during follicular growth (PubMed:30933929).  
o promote progression through the cell cycle via angiotensin I converting enzyme 2 and cyclin

onse and immune homeostasis, glial differentiation of neuroprogenitor cells, cell death of cardiac

ithesized CENPA into centromeres. Part of a nucleosome-associated complex that binds speci  
can be either protein-coding or non-coding. The primary transcript is cleaved by the Drosha ribc

teins from speckles to a diffuse nucleoplasmic distribution. Acts as a suppressor of hepatic gluc  
can be either protein-coding or non-coding. The primary transcript is cleaved by the Drosha ribc

7me3, respectively. Displays a preference for substrates with less methylation, loses activity wl  
ecules involved in centriole formation (PubMed:21059844, PubMed:20852615). Proposed to sr  
can be either protein-coding or non-coding. The primary transcript is cleaved by the Drosha ribc

It therefore negatively regulates cell spreading and cell migration.

ie. Promotes cell differentiation (By similarity).

ie. Promotes cell differentiation (By similarity).

ca-B-mediated transcription. In vitro, upon association with NFKB1/p50 has transcriptional activ  
ed:24396869, PubMed:28114273). In vitro also methylates unmodified 'Lys-20' (H4K20me0) of

and stearoyl-CoA (PubMed:15907797, PubMed:18765284). Gives rise to a mixture of 16:1 and



1α,25-dihydroxy-2β-(3-hydroxypropoxy)-cholecalciferol), a second-generation vitamin D analog, is a transcriptional activator of the sugar-phosphate structure of double-stranded DNA. Transcriptional repressor controlling transcription of the *CEP150* gene (complex III) and cytochrome c oxidase (complex IV, CIV), that cooperate to transfer electrons derived from NADH to oxygen. Required for CEP152 localization to the deuterosome. Marker of tumor progression. [provided by RefSeq, Dec 2017]

It is derived from the Latin roots 'circa' (about) and 'diem' (day) and acts as an important regulator of transcription factors such as ELK1 and ATF2. Accordingly, p38 MAPKs phosphorylate and activate HSP70. Acts as a chaperone-like protein that protects the hydrophobic precursors from aggregation. Functions as a regulator of apoptosis. Mediates effects of polyamines on neuronal process extension. It is derived from the Latin roots 'circa' (about) and 'diem' (day) and acts as an important regulator of transcription factors such as ELK1 and ATF2. Accordingly, p38 MAPKs phosphorylate and activate HSP70. Acts as a chaperone-like protein that protects the hydrophobic precursors from aggregation. Functions as a regulator of apoptosis. Mediates effects of polyamines on neuronal process extension.

A TRAF2-dependent pathway. Acts as a downstream mediator for CASP8-induced activation of HSP70. Acetylase activity has been observed in vitro (PubMed:11861901, PubMed:11726666, PubMed:11726666).

A molecule that contains AU-rich elements (AREs) found within the 3'-UTR of many proto-oncogenes and adenocarcinomas. Transcription from this gene is negatively regulated by insulin and insulin resistance. Involvement in stabilization of nucleolar transcription factor 1/UBTF on rDNA. Formation of SL1/TIF-IB complex. Functions as a transcription factor. It is derived from the Latin roots 'circa' (about) and 'diem' (day) and acts as an important regulator of transcription factors such as ELK1 and ATF2. Accordingly, p38 MAPKs phosphorylate and activate HSP70. Acts as a chaperone-like protein that protects the hydrophobic precursors from aggregation. Functions as a regulator of apoptosis. Mediates effects of polyamines on neuronal process extension. It is derived from the Latin roots 'circa' (about) and 'diem' (day) and acts as an important regulator of transcription factors such as ELK1 and ATF2. Accordingly, p38 MAPKs phosphorylate and activate HSP70. Acts as a chaperone-like protein that protects the hydrophobic precursors from aggregation. Functions as a regulator of apoptosis. Mediates effects of polyamines on neuronal process extension.

It is derived from the Latin roots 'circa' (about) and 'diem' (day) and acts as an important regulator of transcription factors such as ELK1 and ATF2. Accordingly, p38 MAPKs phosphorylate and activate HSP70. Acts as a chaperone-like protein that protects the hydrophobic precursors from aggregation. Functions as a regulator of apoptosis. Mediates effects of polyamines on neuronal process extension. It is derived from the Latin roots 'circa' (about) and 'diem' (day) and acts as an important regulator of transcription factors such as ELK1 and ATF2. Accordingly, p38 MAPKs phosphorylate and activate HSP70. Acts as a chaperone-like protein that protects the hydrophobic precursors from aggregation. Functions as a regulator of apoptosis. Mediates effects of polyamines on neuronal process extension.

, PubMed:18955485). (Microbial infection) Acts as an attachment factor for Human immunodeficiency virus (HIV). Can be either protein-coding or non-coding. The primary transcript is cleaved by the Drosha ribonuclease. Regulates the trafficking of endosomal alpha5beta1 integrin to the plasma membrane. Promotes the positive selection of thymocytes.

Mediates coupling to G proteins (PubMed:18165688). Ligand binding causes a conformational change.

Contributes to stimulation of phagocytosis of apoptotic retinal pigment epithelium (RPE) cells and neurons.

Can be either protein-coding or non-coding. The primary transcript is cleaved by the Drosha ribonuclease.

(PubMed:16617059, PubMed:17472963, PubMed:27642067, PubMed:18451993). Plays an important role in the regulation of cholesterol metabolism.

(PubMed:23763432). Also binds dehydroepiandrosterone (DHEA), pregnanolone, pregnenolone. Constitutes the major mechanism by which docosahexaenoic acid (DHA), an omega-3 fatty acid, is converted to 17-oxo-DHEA.

Is located in the erythrocyte membrane. Allelic variants, some of which lead to adverse transfusion reactions.

in stabilization of nucleolar transcription factor 1/UBTF on rDNA. Formation of SL1/TIF-IB excludes apoptosis.

Platelets: rapidly and quantitatively secreted from platelets in response to stimulation of platelet degranulation (By similarity).

Origin: It is derived from the Latin roots 'circa' (about) and 'diem' (day) and acts as an important regulator (PubMed:27789713).

Function: (PubMed:12482949). Involved in fluid-flow mechanosensation by the primary cilium in renal epithelial cells. Regulates the actin cytoskeleton and promotes synaptic transmission (By similarity).

Protein product. [provided by RefSeq, Oct 2011]

Family: family of ribosomal proteins. It is located in the cytoplasm. As is typical for genes encoding ribosomal proteins.

Function: regulates smooth muscle cells vasoconstriction. Positively regulates bone mineralization through abscisic acid. Physically binds the myristoyl moiety of a subset of N-terminally myristoylated proteins and is required for their function.

Function: binds to the DNA binding domain of the glucocorticoid receptor (nuclear receptor subfamily 1, group 1, member 1).

Function: involved in immune response. [provided by RefSeq, Dec 2017]

Function: involved in DNA replication, DNA repair and heterochromatin organization as well as in ribosomal RNA processing.

Function: may regulate the TRAX/TSN complex formation. Potentiates transcriptional repression.

ne biogenesis by suppressing the formation of aberrant centriolar protein complexes in the cytoplasm,

phenylpyruvate and alpha-oxo-gamma-methylbutyric acid. Can also use glyoxylate as a mitochondrial substrate.

membrane catalytic core, and F<sub>0</sub> - containing the membrane proton channel, linked together by the

association of CREBBP. Seems to act as a corepressor of SIX6 in regulating proliferation by

can be either protein-coding or non-coding. The primary transcript is cleaved by the Drosha ribonuclease

(PubMed:27193190, PubMed:27103069, PubMed:27617292, PubMed:28195531). In the context of neuronal differentiation, this mechanism occurs as neurons exit the cell cycle and become committed to their adult state. The

is involved in vesicle formation and in uptake of lipid signaling molecules. In vitro, its ATPase activity is stimulated by growth factors including FOS, OSM and PPARG. Recruits a histone deacetylase complex (By similarity)

can be either protein-coding or non-coding. The primary transcript is cleaved by the Drosha ribonuclease

can be either protein-coding or non-coding. The primary transcript is cleaved by the Drosha ribonuclease

can be either protein-coding or non-coding. The primary transcript is cleaved by the Drosha ribonuclease

is involved in catalyzing monoubiquitination of FANCD2, a key step in the DNA damage pathway (PubMed:16040000)

transporter SLC2A2 by binding specifically to its promoter region and recruiting PDX1 and addi

general. Members of this gene family are characterized by tandemly repeated copies of DUF1:

ed:10681376). Mechanistically, uses molecular oxygen inserting one oxygen atom into a subst

can be either protein-coding or non-coding. The primary transcript is cleaved by the Drosha ribc

the influx of which may activate a potassium current which hyperpolarizes the cell membrane.  
nit the myosin phosphatase activity to regulate myosin phosphorylation. Also critical to the mod  
APC/C complex. Also mediates deubiquitination of 'Lys-48'-linked polyubiquitin chains in vitro. F

By similarity).

n at the metaphase-anaphase transition permits replication in the succeeding cell cycle (PubM

can be either protein-coding or non-coding. The primary transcript is cleaved by the Drosha ribc  
LIMK1. Does not dephosphorylate peptides containing phospho-tyrosine (PubMed:15580268).

with NMDA receptor signaling. Overexpression or depletion of DLG4 changes the ratio of excitatory and inhibitory transmission. In addition to (C14)-containing phosphatidylcholines, may also act on other medium-chain fatty acids. Plays a role in terminal differentiation of interneurons, such as arcuate nucleus neurons (PubMed:14671321).

can be either protein-coding or non-coding. The primary transcript is cleaved by the Drosha ribonuclease.

enhance and telomere capping in mammalian cells.

gene. [provided by RefSeq, Oct 2009]

leading to disrupt the interaction of these protein components. This downregulation of ERAD may

the conversion of H<sub>2</sub>S to thiosulfate, and the sulfur dioxygenase (SDO) which uses GSS(-) as

sis induced by oxidative stress (PubMed:11007892, PubMed:22010141). Also protects against

breaks by homologous recombination. The complex may promote sister chromatid homologous

carcinomas (HNSCC) (PubMed:12414649, PubMed:15700036).

46 in the U5 small nuclear RNA. [provided by RefSeq, Jun 2010]

isNORD43, function in 2-prime-O-ribose methylation of rRNAs (Duga et al., 2000 [PubMed 1068

unique cytoplasmic tails. [provided by RefSeq, Jul 2008]

sylation. N-glycosylation occurs cotranslationally and the complex associates with the Sec61 complex. It can be either protein-coding or non-coding. The primary transcript is cleaved by the Drosha ribonuclease. It can be either protein-coding or non-coding. The primary transcript is cleaved by the Drosha ribonuclease.

It is a transmembrane protein with a GPI anchor that is directly involved in signal transduction (Mallya et al., 2002 [PubMed 12073333]). Positively regulates SHH signaling in the presence of SHH: dissociates from SUFU, autophosphorylates.

Results in multiple transcript variants. [provided by RefSeq, Aug 2014]

It is involved in the formation of a repressor complex and a recruitment of an activator complex. In resting neurons, transcription is repressed.

It is involved in the regulation of gene expression, thereby delaying the differentiation of neuronal progenitors and leading to an overall increase in cell proliferation (PubMed:25320081). Is inhibited strongly by pyridoxal 5'-phosphate, 4,7-diphenyl-1,10-phenanthroline.

It is involved in the final methylation step of the phospholipid remodeling pathway also known as the Lands cycle.



between TRPA1 and TRPV1, two molecular sensors and mediators of pain signals in dorsal root ganglia. Regulated by Polycomb activities in sexually uncommitted germ cells. Regulates expression of STRA8 from G1 to S phase. E2F1 binds preferentially RB1 in a cell-cycle dependent manner. It can mediate cell survival. Signaling appears to involve the PI3 kinase pathway. Involved in regulation of the secretory pathway. Increases the presence of the channel complex at the cell membrane (PubMed:15615847). Recruits

Required for normal hearing (PubMed:29293958).

Required for skeletal homeostasis. Promotes mammary mesenchyme differentiation and bud outgrowth in mammary glands.

)]

Identified by RefSeq, Jan 2009]

CIII) and cytochrome c oxidase (complex IV, CIV), that cooperate to transfer electrons derived from NADH to oxygen. Overexpression of this gene is associated with prostate cancer.

Binds to the consensus site 5'-GCGCCC-3' in the promoter of PTCH1 (By similarity).

It is thought to form molecular scaffolds for ribonucleoprotein complexes. It may act as a transcription factor.

Regulation of actin polymerization (PubMed:26573021).

Immunoglobulins serve as receptors which, upon binding of a specific antigen, trigger the clonal expansion, activation, growth and motility. [provided by RefSeq, Jul 2008]

The ephrin ligand is referred to as reverse signaling. Among GPI-anchored ephrin-A ligands, EFN1 regulates glycogen synthase synthesis by mediating phosphorylation of GYS1, leading to GYS1 recruitment to microtubules. May play a role in changing or maintaining the spatial distribution of cytoskeletal structures.

by similarity).

10329423, PubMed:19065001, PubMed:26195816). The cholesterol ester is then transported

associated double-strand breaks. It may act by mediating the assembly of RAD51 filaments on ssDNA to facilitate the transport and translation of mRNAs, modulating for instance the expression of proteins

transcription elongation by phosphorylating the CTD (carboxy-terminal domain) of the large subunit of RNA polymerase II. It is also involved in DNA damage repair (LP-BER). The 9-1-1 complex stimulates DNA polymerase beta (POLB) activity by

ubiquitination of target proteins (PubMed:14528312).

SNORD83B, function in 2-prime-O-ribose methylation of rRNAs (Duga et al., 2000 [PubMed 11111111]). It is involved in the delivery into neurites and nerve terminals. The BLOC-1 complex, in association with SNARE proteins, is involved in the delivery of BDNF (PubMed:18180299, PubMed:19131338). Plays an important role in neural progenitor cell proliferation (PubMed:8647185, PubMed:20421648). Delivers inhibitory signals upon binding to ligands, such as FGL1.

involved in the synthesis of lipids and the degradation or generation of lipid-signaling molecules like diacylglycerol in epidermal cells. The encoded protein is thought to function as a negative regulator of epidermal growth factor receptor signaling. A component of the pH buffering system for maintaining acid-base homeostasis. Acts as a versatile G-protein-coupled receptor.

involved in fatty acid oxidation and glucose uptake. Has intermediate affinity for globular and full-length

o insulin stimulation and serves as an adapter protein to recruit PDPK1 to activated insulin receptors on adjacent cells, leading to contact-dependent bidirectional signaling into neighboring cells. The s

-induced apoptosis. Promotes apoptosis by regulating three pathways, apoptosome up-regulat

can be either protein-coding or non-coding. The primary transcript is cleaved by the Drosha ribc

some cellular genes in CREBZF-expressing cells.

erexpression increases adherence. Neither protein has to be glycosylated for the interaction to  
'CD2 interaction may prime response by both the CD2+ and LFA-3+ cells.

if the active GTP-bound form (PubMed:7479768, PubMed:17116687). The central Dbl homolog

or of T-cell coactivation, by binding DPP4 (PubMed:20959412). Its interaction with DPP4 regulat  
dependent endocytosis in which cargo proteins are incorporated into vesicles surrounded by clathr  
s a role in the final digestion of peptides generated from hydrolysis of proteins by gastric and pa

involved in negative regulation of the survival capacity of activated CD4(+) and CD8(+) T cells (

seudogene has been identified in the pseudoautosomal region of chromosome Y. [provided by F

tress pathway (PubMed:24035498).

ent T-cell populations from non-lymphoid organs. Plays a role in the development, retention an  
G-protein coupled receptors, antigen receptors and integrins. Induces tyrosine phosphorylation  
manner (PubMed:27076518, PubMed:15102863). In response to endoplasmic reticulum stress (ER  
TR) ARE mRNA-binding adapter protein to communicate signaling events to the mRNA decay i

nyosin ATPase by binding to F-actin. This inhibition is attenuated by calcium-calmodulin and is

pressor activity, leading to translation of CPEB3 target mRNAs (By similarity).  
pper domain and the membrane attachment domain. Cleaves and activates caspase-6, -7 and  
lpha subunits and can functionally regulate their activity (By similarity). Involved in the costimul  
omponents. Presents carbohydrate ligands to selectins.

ion and homing of T-lymphocytes, hematopoiesis, inflammation and response to bacterial infec  
tigen processing by stabilizing peptide-free class II alpha/beta heterodimers in a complex soon

ependymocytes in the adult subependymal zone: upon cleavage by MMP24, CDH2-mediated ar  
rough control of the cohesion and organization of the intercellular junctions (By similarity). It as

967). Requires substrates with an unsubstituted N-terminus (PubMed:19038966).

similarity).

inflammatory processes. Plays an important role in the regulation of osteoclast proliferation and

ated in tumor invasion and metastasis (PubMed:3972105).

olysis of TG/thyroglobulin in the thyroid follicle lumen (PubMed:11082042).

1 of leukocytes through adhesive interactions with JAML a transmembrane protein of the plasm  
in important role in the regulation of pathways leading to NF-kappa-B activation (PubMed:1291  
depending on the cellular setting. Involved in regulation of starvation-induced autophagy. Regu  
ses 5' single-stranded RNA overhang nuclease activity. Possesses ATPase activity on various I

JT1, and hence stabilizes and attaches the spectrin-actin network to the erythrocytic plasma m  
the ephrin ligand is referred to as reverse signaling. Functions in axon guidance during develop

tion (PubMed:22727489).

. Can also be transactivated by cleaved F2R/PAR1. Involved in modulation of inflammatory response. Marked preference for Ala/Ser-Gly-Pro-Ser/Asn/Ala consensus sequences, on substrate such as

regulator of appetite and adiposity; increased expression of the protein in liver after nutrient excess modulate the RYR1 calcium channel activity. PPases accelerate the folding of proteins. It catalyzes the cortical plate. Various interactions and localizations of isoforms affect myotube morphology for maintaining the structural integrity of the muscle fibers.

regulates angiogenic sprouting. Signaling by activated FLT4 leads to enhanced production of VEGF domain. Following activation by PKA, the protein subsequently associates with PTK2/FAK1, allowing

1828). Plays a role in ebolavirus and marburgvirus cell entry by apoptotic mimicry (PubMed:171

(By similarity).

high concentrations of dipeptides and some amino acids, can also catalyze a transpeptidation reaction (PubMed:11929858, PubMed:23238346). Heteropentameric channels composed of GLRB and beta-hexosaminidase A. It extracts single GM2 molecules from membranes and presents them

Activates effector molecule RhoA by binding and activating RhoGEFs (ARHGEF12/LARG) (PubMed:11929858). beta-2-adrenergic receptor: they inhibit the cyclase in response to beta-adrenergic stimuli. May play a role in the regulation of gene expression, including adrenergic receptors, muscarinic acetylcholine receptors (more specifically Gi-coupled receptors) by inhibiting 'Lys-63'-linked ubiquitination (By similarity). In the nucleus, can both act as a co-receptor

in, but in a glycosaminoglycan-independent manner.

regions.

by replacing linker histones at target enhancer and/or promoter sites. Binds DNA with the consensus sequence

by translocation of BAX from the cytosol to mitochondria in response to cellular stress, thereby promoting apoptosis. beta-5: beta-5/beta-6. In tumors, stimulates angiogenesis by elongation, migration and sprouting of endothelial cells

receptor, composed of the subunits IL15RA, IL2RB and IL2RG, which results in kinase SYK activation

by hemidesmosome (By similarity). ITGA6:ITGB4 binds to NRG1 (via EGF domain) and this binding is required for the activation of the site II (H1NF-M) promoter region of H4 and activating transcription during the cell cycle. Additional roles in the maturation of snRNAs and rRNAs, and in ribosome biogenesis.

er potassium channels are characterized by a greater tendency to allow potassium to flow into

in and integrin alpha-6/beta-4 in hemidesmosomes, (2) signal transduction via tyrosine phosph

/TIM3 (PubMed:16286920). Binding to HAVCR2 induces T-helper type 1 lymphocyte (Th1) dec  
hydrogenation pathway of linoleic acid (LA) (18:2n-6).

nscriptional activation (PubMed:27735137). Shows no activity against histone H3 when it is trin  
gnals arising from soluble factors and cell-cell adhesion sites. Also suggested to serve as a sca

ricin binds to the bacterial surface and is crucial for the bactericidal functions. Has some antivii  
tein (BMP)-mediated cardiac-specific gene expression.

lls during embryonic development. Acts as surface receptor that triggers tyrosine phosphorylati  
re control of cell growth, survival and apoptosis via p38 MAPK signaling in muscle-specific and  
g proliferation, scattering, morphogenesis and survival. Ligand binding at the cell surface induc

PubMed:27545619). Specifically recognizes and binds acylated histone H3, with a preference fo  
16807369).

idogen, nascin-C isoform, fibronectin, and type I gelatin.

on-sulfated polysaccharide chains.

r. It is derived from the Latin roots 'circa' (about) and 'diem' (day) and acts as an important regu

al ganglion neurons to innervate auditory hair cells (PubMed:27162350).

Its activity is mediated by G proteins which activate the phosphoinositide signaling pathway. P  
en bind to the inactive monomeric form of ribonuclease L (RNase L) leading to its dimerization

. Activation by the binding of active CDC42 and RAC1 results in a conformational change and which are catalyzed by separate catalytic domains of the enzyme. The first step, catalyzed by the and of PKA-dependent phosphorylation of DNM1L (PubMed:28463107).||Cyclic nucleotide a role in glucose homeostasis and in maintaining normal blood glucose levels in function of nu lateral border recycling compartment (LBRC) and is also essential for the LBRC membrane tc ated in vesicle formation and in uptake of lipid signaling molecules. May play a role in asymme

ulates osteogenic cell differentiation and bone mineralization through the cleavage of the MEP

l:9132017, PubMed:11013307, PubMed:19321130, PubMed:21515415, PubMed:29883800). F on (PubMed:12196628, PubMed:15210733). Plays a role in axon guidance, invasive growth ar

ss I binding peptides. Replacement of PSMB5 by PSMB8 increases the capacity of the immu d:17331072, PubMed:30367560, PubMed:22801504, PubMed:23867277). In fibroblasts, requi transduction pathways and phosphoprotein network topology in red blood cells. May play a rol

inhibition of neurite and axonal outgrowth by chondroitin sulfate proteoglycans, also after nervi of reactive oxygen species (ROS) by NADPH oxidase.

se core vesicles. The RALA-exocyst complex regulates integrin-dependent membrane raft exo iation.

the endosomes. Promotes neuronal apoptosis by mediating endocytosis of the proapoptotic pi

for monocytes and basophils but not neutrophils or eosinophils (PubMed:8627182, PubMed:97

is of dendritic cells (DC), effector/memory T-cells and B-cells and plays an important role at sk

iding to the classical ligand-binding site (site 1) in integrins. In the absence of CX3CR1, binds to

in vivo, and can induce, in vivo, an angiogenic response. In vascular cell cycle, delays the G1

as, and stress fibers (PubMed:22155786). Important for the formation of a diverse set of cell pr

D4-positive T-cells into peripherally induced regulatory T (pT reg) cells under inflammatory conc

thways that control a diverse spectrum of biological activities including gene transcription, immu

regulation through MLCK during cell spreading, an initial step in cell migration. May play a role in transcriptional repressor activity of SIX3 during retina and lens development and for SIX3 transcription levels, and amino acids (PubMed:31036939). Interacts with Rag GTPases and increases the lysosomal migration. Its interaction with RHOB may regulate apoptosis. May enhance the PCNA-dependent recruitment of the antiapoptotic E3 protein-ubiquitin ligases BIRC2 and BIRC3 to TNFRSF1B/TNFR2. Involved in responses. Plays a role in the regulation of antiviral responses. Is an essential constituent of the complex of NF-kappa-B by EIF2AK2/PKR.

Mediates 'Lys-11'- and 'Lys-48'-linked polyubiquitination (PubMed:20061386). Capable, in vitro, to solubilize lipids/GSLs, amphipathic molecules consisting of a ceramide lipid moiety embedded in the outer leaflet of the plasma membrane.

Development. Plays a redundant role in maintaining joint integrity. Located on the Y-chromosome. Primary. It is transcribed, but not expected to make a Y-chromosome specific gene product. Altered expression of RIPK1 and TRAF6 but not of RELA. Inhibits also tumor necrosis factor (TNF) signaling.

and RORC. Involved in the regulation of ovarian function (By similarity). Plays a role in renal development (PubMed:21457715). In concert with MYO18A and LURAP1, is involved in modulating lamellipodium formation by monocytes and macrophages. Plays an important role in modulating inflammation and cell-cell signaling between axons and myelinating glial cells.

Located on the short arm of chromosome 17. Alternatively spliced transcript variants encoding multiple isoforms have been identified. Interacts with methionyl-tRNAi and eIF-5 to form the 43S pre-initiation complex (43S PIC). The eIF-3 complex is involved in the assembly of the 43S PIC.

Primary. Inhibits TNF signaling. Interacts with TRAILR4 and TNFRSF11B/OPG that cannot induce apoptosis. Involved in the regulation of apoptosis (via caspase proteases) mediating apoptosis. Promotes the activation of NF-kappa-B. Essential for ER stress-induced apoptosis. Involved in the regulation of the actin cytoskeleton at the plasma membrane. May promote neurite outgrowth (PubMed:11114884).



), PubMed:28404643, PubMed:22622177). Along with WDFY3, involved in the formation and a  
6PR), between lysosomes and the Golgi apparatus in a retromer-dependent manner (PubMed:  
uple CD2 and CD2AP to WAS. Acts downstream of CD2 and CD2AP to recruit WAS to the T-c  
ipogenesis. In addition, promotes expression of the gluconeogenic enzyme glucose-6-phosphat  
n of lipid-droplet biogenesis (By similarity). Down-regulates the expression of TGFB1 and TGFB  
ed Smads, such as SMAD2.||Plays a role in vesicle-mediated protein trafficking of the endocyt  
y a critical role as an adapter protein in the formation of the adhesion zone in osteoclasts. Neg  
ed at 'Lys-27' and trimethylated at 'Lys-27' (H3K9me3, H3K27me2 and H3K27me3, respectively  
LL ligands are present in high endothelial cells (HEVs) and play a central role in lymphocyte hc  
ifferently regulated and may play an important role in maintaining the plasticity at glutamatergic  
ity by retaining JNK in the cytoplasm and inhibiting JNK phosphorylation of c-Jun. May also pai  
s (ROS) generation and ROS localization. In association with ADAM12, mediates the neurotox  
: recycling endosomes and the Golgi. Required for maintenance of the Golgi structure, it is invc  
7). Involved in regulation of adherens junction between cells (PubMed:12628187). Plays a role  
ivates RAB22A, and promotes polarized trafficking to the leading edge of the migrating cells. P  
ates NF-kappaB signaling and cell survival upon DNA damage (PubMed:25861989). Plays a rc  
ssibly through a caspase-mediated pathway. Isoform BimAC and isoform BimABC lack the abil  
NEDD9 (By similarity). May be involved in the regulation of T-cell receptor-mediated IL2 produc

1336257).

ction with the Arp2/3 complex.

ance and subsequently is targeted to the Golgi in a lipid-raft dependent pathway (PubMed:16880

: species specific. This protein also undergoes N-terminal myristoylation. Alternative splicing re

uitation levels and thus stability of NRF2. Acts as a scaffold protein and facilitates autophagic  
16532, PubMed:18215137, PubMed:17222411). Interaction with CD9, on the contrary, attenua  
ntaining proteins. Role in G2-M progression in the cell cycle. Represses CBP-dependent trans

nal corepressor for FOXG1B and PAX9. Favors the proliferation of breast cancer cells by repre  
calization which is critical for ciliogenesis (PubMed:27224062).

ard long chain acyl CoAs (C14-C20) (PubMed:16940157, PubMed:10944470). The enzyme is i  
such as isopentenyl pyrophosphate.

y).

rocesses (PubMed:24995978). TRAK1 and RHOT form an essential protein complex that links

1460). Endosome membrane fission of early and late endosomes is essential to separate regioi  
s residue generates formaldehyde and succinate.

r extension, such as filipodia in association with ALK1. Involved at the immediate early stage of

endoplasmic membrane. Acts also as a nuclear transcriptional coactivator for PPARGC1A/PPA

ubiquitination and proteasomal degradation of the apoptosis inhibitor BIRC5 (PubMed:2577839;

:12699629). Overexpression induces telomere uncapping, chromosomal end-to-end fusions (to  
the PKA-dependent processing of GLI3 into GLI3R and repress the Shh signaling. In presence  
obably recognizes and binds some squalene structure, suggesting that it may regulate choleste  
gulatory factor of ER-alpha.

on of RHOA and phosphorylation of ERBB2 at 'Tyr-1248' (By similarity). Required for normal di  
Mediates axon growth cone collapse and plays a repulsive role in neuron guidance via its intera  
ed:30918116).

terminally truncated form of APP amyloid-beta peptides [Glu-3]-amyloid-beta. May be involved in  
been shown that it can cleave APP between residues 671 and 672. Responsible also for the p

Med:26431200, PubMed:28229507, PubMed:28834754, PubMed:29670289). Has deoxynucleo  
establishment of the blood-brain barrier (By similarity). Acts as a Wnt7-specific coactivator of c

ulates RRAS signaling which in turn attenuates integrin beta-1 (ITGB1) activation at the cell sur  
and recruits the ATG12-5-16L1 complex, initiating LC3 conjugation, autophagosomal membrane

Binds selectively to GNAZ and GNAI2 subunits, accelerates their GTPase activity and regulat

TCF4.

terior axial patterning, limb development, somitogenesis and eye formation. In the adult, Dkks a

is required for both normal cell body death and axonal pruning. Trophic-factor deprivation triggers independently of FADD in certain cell types and also mediates mitochondrial translocation of BAX in response to ribosome biogenesis perturbation, DNA damage and other stress conditions (PubMed:11101400). Constitutive NADPH oxidase which generates superoxide intracellularly upon formation of a complex with the membrane transduction protein involved in the differentiation of fibroblasts into adipocytes and possibly in the structural and functional organization of the dendritic spine and synaptic junction.

Can inhibit tumor cell growth by inhibiting AKT-mediated cell-survival. Also implicated in PI3K-regulated transcription (PubMed:19549071). Binds to the COL2A1 promoter and activates COL2A1 expression, as part of a complex with p53.

Involved in actin-dependent fluid-phase endocytosis. Plays a role in macropinocytosis. Promotes internalization of ligands.

Cellular storage (By similarity). Utilizes a wide range of saturated fatty acids with a preference for palmitic acid.

Acts as a protein receptor, but instead requires the prior addition of a GalNAc on a peptide before adding ligand.

Acts by forming a complex with RAB18 and ZW10 (PubMed:30970241). Binds to phosphatidylinositol (3-OH)-phosphate levels.

Mediates the intramembrane cleavage of integral membrane proteins such as Notch receptors and APP (amyloid precursor protein).

Phology.

Regulates energy levels and cellular stress, including responses to hypoxia and DNA damage. Regulates p53 activity and hydroxylates HIF2A. Has a preference for the CODD site for both HIF1A and HIF1B. Hydroxylates HIF1A and HIF1B.

Involved in budding or cell enlargement. The activities oscillate with a period length of 24 minutes and play a role in cell cycle regulation.

Mediates p53-dependent ERV silencing in embryonic stem cells.

association. Alternative splicing results in multiple transcript variants. [provided by RefSeq, Ma

by acting as a mediator of the p53/TP53 family to regulate CDKN1A. CDKN1A is a cyclin-depe  
R2/CD23 expression.

ubstrates (By similarity).

otase expression and telomerase activity in both ALT (alternative lengthening of telomeres)and

and restriction of plasticity in the adult CNS (PubMed:10667797, PubMed:11201742). Regulati

ty). Plays a crucial role in cholesterol homeostasis in the adrenal gland and has the unique abil

ted substrates.

containing USP12 (PubMed:19075014, PubMed:27650958, PubMed:27373336). Docks at the

onditions (PubMed:11522682, PubMed:11975663). Involved in intracellular deglycation in erythr  
residues Arg and Lys.

MAD7 activates autocatalytic degradation, which is prevented by interaction with SCYE1. Form



al cells.

ferritin receptor. May also bind tubulin. May play a role in the regulation of energy homeostasis.

of the inhibitor TFPI in endothelial cells (in vitro) (PubMed:21868574).

of P-ribosylation of GSK3B, leading to negatively regulate GSK3B kinase activity (PubMed:23330000).  
of per formation (PubMed:25448675).

of tosis regulating for instance endocytosed-EGF receptor trafficking. Alternatively, may regulate :

of ; protein may have important functions in the extracellular matrix. Alternative splicing results in

of ppressor. Negatively regulates, in vitro, trophoblast invasion during placental development and

of sidermal growth factor receptor/protein kinase B signaling during tumor pathogenesis. Alternatively  
ay play a role in calcium signaling by associating with calcium channel proteins. Alternative spli  
12]

of and process formation during migration (PubMed:22926142). May enhance calcium influx thro

located at the cell surface. May be involved in the control of anxiety.

→ premature or ectopic differentiation of preosteoblast cells during osteogenesis, possibly by ch

point variants. [provided by RefSeq, Feb 2015]

activity requires USO1-GOLGA2 tethering and BET1L (PubMed:17141156). VCPIP1 is also require

during synaptogenesis and in synaptic function (By similarity). Involved in the negative regulati

teins TRADD and RIPK1 to TNFRSF1A and regulates PAK4 protein stability via inhibition of its

of blood cells, endothelial cells and mammary epithelial cells.



,6)P5) (PubMed:12027805, PubMed:12223481, PubMed:28882892, PubMed:30624931). Phos

nd ligand binding. The encoded protein contains twelve SRCR domains, a transmembrane reg  
RAF-mediated phosphorylation of MAP2K1/MEK1 (PubMed:29433126). Interaction with BRAF  
cytotoxic drug maytansine, which is used in antibody-based targeting of cancer cells. [provided  
zation. Plays a role in mitotic clonal expansion during the immediate early stage of adipocyte d

mediate cellular signaling pathways regulating several biological processes including cell prolifera

ed by RefSeq, Mar 2014]

probably due to the presence of the glycosaminoglycan (GAG) side chains of heparan and chondr

ine phosphorylation of proteins controlling cytoskeleton dynamics like WASF3 (involved in bran  
n (PubMed:15772161). Involved in tight junction assembly in epithelial cells probably through ir

| GTP as phosphate donor (PubMed:19073142, PubMed:19766732, PubMed:23416111). Also  
subcellular localizations. Most Caucasians have two major isozymes, while approximately 50%

(By similarity). Is also involved in the regulation of intracellular vesicles sorting, modulation of f

also competes with LDLR for binding with PCSK9 (PubMed:18799458, PubMed:24808179, Pu

nducing apoptosis. May act by specifically recognizing and binding histone H2AX phosphorylate  
ulates the Cu/Zn nitric oxide-catalyzed autodegradation of GPC1 heparan sulfate side chains i  
oproteins and apolipoproteins E and J in the CSF and to HDL particles in plasma, inhibiting me  
ells.

inhibits the GDP/GTP exchange of RhoB but shows less ability to inhibit the dissociation of preb  
ing its activity. Involved in membrane trafficking and Ca(2+)-dependent membrane fusion. May p  
stabilizing G-rich regions into regular chromatin structures by remodeling G4 DNA and incorpo  
of the cell cycle in response to DNA damage. Acts by mediating ubiquitin E3 ligase activity that

nt involved in the translocation includes the region that shares a strong sequence similarity with

term depression (LTD). Binding to NGFR and SORCS2 promotes neuronal apoptosis. Promote

2+) in the erythrocyte (PubMed:28409866). This essential step leads to a rearrangement of the  
nternalized by endocytosis and subsequently degraded or they can remain on the cell surface.

nding regulatory subunit that allosterically enhances the sequence-specific DNA-binding capacit  
its cytokine production by mature dendritic cells. Interaction with SIRPG mediates cell-cell adhi

cell cycle exit during cell differentiation; prevents cell proliferation and regulates negatively cel  
its nucleocytoplasmic shuttling by sequestering it in the nucleolus. This inhibits the oncogenic a

y APP, APOC2, B2M, CALCA, CSN3, SNCA and aggregation-prone LYZ variants (in vitro) (Pu  
nce of vessel wall integrity and structure, in particular in atherogenesis. ||Vastatin, the C-termin  
rus-binding protein. Transcript variants utilizing alternative polyadenylation signals exist for this

i.

duced DNA synthesis.

o be a stable component of E-cadherin/catenin adhesion complexes and to mediate the linkag

on, including the localization of the dopamine receptor DRD1 to the dendritic spines (By similar  
ig the sarcolemma. Also implicated in signaling events and synaptic transmission.

short to bind RPA and becomes a substrate for FEN1. Also involved in 5'-end resection of DN.  
ates Rac Rho small GTPases by exchanging bound GDP for free GTP. Its GEF activity may be  
in a T-cell receptor/CD3-dependent manner. Its interaction with ADA also regulates lymphocyte

and STAT3. May also activate the LYN tyrosine kinase.

epresses transcriptional activity of the lutropin-choriogonadotropic hormone receptor/LHCGR g

trienoic acids (EETs) or hydroxyeicosatrienoic acids (HETEs) (By similarity).

103621). Has mainly an anabolic role in energy metabolism. Mediates hepatic lipogenesis. Pref  
' activates 8,9-EET > 14,15-EET > 5,6-EET > 11,12-EET. Modulates glucose-stimulated insulin  
bility and calibrating TGF-beta and BMP levels, respectively.

ers the flap from the 5'-end and then tracks to cleave the flap base, leaving a nick for ligation. A  
ogenesis and normal development of the gonadotropin-releasing hormone (GnRH) neuronal sy

è regulator of embryonic angiogenesis by inhibiting excessive proliferation of endothelial cells. (

e-scavenging receptor or chemokine decoy receptor. Has a promiscuous chemokine-binding pi

Deficiencies of this enzyme lead to Morquio A syndrome, a lysosomal storage disorder. [provid

leukocytes.

identical to the elastin-binding protein (EBP), a major component of the non-integrin cell surface

PubMed:30970188).

Charidosis type IIID is the least common of the four subtypes of Sanfilippo syndrome. [provided  
ulator of lysosomal function and as a growth factor involved in inflammation, wound healing and

, JUN, NFATC1/NFATC, MAPT/TAU and MACF1. Requires primed phosphorylation of the major

inducible transcription of a reporter gene driven by the C-FOS serum response element (SRE)

four consecutive reactions breaking down fatty acids into acetyl-CoA (PubMed:29915090). Amc

ctions breaking down fatty acids into acetyl-CoA (PubMed:29915090). Among the enzymes in

ation of large multiprotein complexes. Deacetylates SP proteins, SP1 and SP3, and regulates

omatrin, implying a functional role in the regulation of transcription and mitosis (By similarity).

delivery or facilitate metabolic adaptation to hypoxia. Plays an essential role in embryonic vas

3HLY) and WT1 (TSEKRPFMCAAY), all having in common a canonical motif with a negatively cl

l response against tumor cells (PubMed:29531227). Presents viral epitopes derived from HIV-1

ase 2 could be implicated in the production of carbon monoxide in brain where it could act as

-HNRNPC tetramers bind 230-240 nucleotides. Trimers of HNRNPC tetramers bind 700 nucleot

ne nucleotide-binding proteins (G proteins) and modulates the activity of down-stream effectors

differentiation, apoptosis, angiogenesis, and neoplastic transformation. Involved in myogenesis

1986). Type I interferon binding activates the JAK-STAT signaling cascade, and triggers tyrosin

other receptor subunit responsible for ligand binding (PubMed:7673114).

compartment where the low pH mediates the dissociation of the complex. This receptor also bir

EM219/IGFBP-3R.

through activation of insulin receptor substrates, IRS1/IRS2. Soluble IL4R (sIL4R) inhibits IL4- (532). Synergizes with IL12/interleukin-12 to induce IFNG synthesis from T-helper 1 (Th1) cells

target genes. Binds DNA and mediates the recruitment of the PRC2 complex to target genes. Chemical gradient. The channel is selective for K(+) ions at physiological potassium concentrations

chains and are clustered in a region on chromosome 17q21.2. [provided by RefSeq, Jul 2008]

signal transduction pathways (PubMed:10436159, PubMed:11832213, PubMed:12807904, PubMed:12807904, PubMed:12807904, PubMed:12807904)

rine.

the alpha-v/beta-3 and alpha-v/beta-5 receptors. Also binds to phosphatidylserine-enriched cell membranes. 1-6 linkage to the alpha-linked mannose of biantennary N-linked oligosaccharides (PubMed:10436159)

iotensin-2 and angiotensin 1-9 (PubMed:15283675). Involved in the degradation of atrial natriuretic peptide (ANP) and anti-tumor properties and inhibits cell migration and cell adhesion to FGF2 and vitronectin

Hydrogen sulfide in the brain, retina and vascular endothelial cells. Hydrogen sulfide H(2)S is an important signaling molecule. Its action is mechanically antagonized by MYH10.

the central part but not the margins of spreading cells), and lamellipodial extension; this function is essential for the

directional polarity of cilia, and for coordinated, unidirectional ciliary movement in the trachea. Requires weak ATP binding (By similarity). Functions in a variety of intracellular processes such as vesicle trafficking

a homo- or heterodimeric complex formed by the Rel-like domain-containing proteins RELB/p65 and NF-kB1/p50. A member of split locus (PubMed:21378985, PubMed:21378989). Affects the implementation of differentiation

in and chondrocyte maturation via a signaling pathway that involves MAP kinases and leads to

its activation and by dissociating the RAF1/MEK complex and acting as a competitive inhibitor of T chaperonin. Acts as a positive regulator of hedgehog signaling and regulates ciliary function

such as BMP2, CALD1 and alpha-integrins.

424, PubMed:15854030). These hydroxylysines serve as sites of attachment for carbohydrate of virion capsids in PML-NBs thereby preventing their nuclear egress and inhibiting formation of

and fatty acids. Regulates the peroxisomal beta-oxidation pathway of fatty acids. Functions as , PubMed:17502104, PubMed:23468591, PubMed:27974827, PubMed:22343722). In response the DNA polymerase alpha complex (composed of a catalytic subunit POLA1, an accessory subunit and lipid biosynthesis, as well as cell growth and proliferation. AMPK acts via direct phospho

phosphorylating targets such as RAF1, BCL2, CSPG4, TNNT2/CTNT, or activating signaling cascade phosphorylation. Involved in nephrogenesis by stimulating renal epithelial cell migration and tubulogenesis. Is toxic to cultured neuroblastoma cells and induce apoptosis (in vitro) (By similarity). Associated

with heparanase. The C-terminus is proline-rich containing PPXY and PXXP motifs found in a variety of heparanases, may release soluble FGF-glycosaminoglycan complexes that promote the range and intensity of heparanase activity. Acts as a heparanase inhibitor. Acts as a heparanase inhibitor. May play a role in intracellular signaling and gene expression or in linking chromatin to the nucleus. Acts as a heparanase inhibitor.

acts as a tyrosine phosphatase, dephosphorylating tyrosine-, serine- and threonine-phosphorylated proteins. Also

acts as a tyrosine phosphatase, dephosphorylating tyrosine-, serine- and threonine-phosphorylated proteins. Also

acts as a tyrosine phosphatase, dephosphorylating tyrosine-, serine- and threonine-phosphorylated proteins. Also

15464, PubMed:22605381, PubMed:22825852). For most substrates, PLA1 activity is much higher. Key determinant of DSB repair pathway choice, as it commits cells to HR by preventing c

ils. Also required for ciliated ependymal cell differentiation. Regulates the expression of genes i

nvolved in microtubule organization and regulation of transport in primary cilia.

eration, survival, and differentiation by modulating mTOR signaling and repressing pro-apoptoti

:10391915, PubMed:10574970, PubMed:30867591, PubMed:10903140). The heterodimer with contraction coupling in muscle. In a first phase, voltage-gated channels mediate the rapid incre

ATP-dependent manner. May stimulate the ATPase activity of the catalytic subunit of the comp

ains (By similarity).

K1) and to tyrosine phosphorylation of STAT1 and STAT2. The phosphorylated STATs dimerize. dehydroepiandrosterone (DHEA), pregnenolone, (24S)-hydroxycholesterol and xenobiotic compounds. acting as a polo kinase kinase: mediates phosphorylation of PLK1 in vitro; however such data require. Eukin 1 receptor type II, p55 TNF-receptor, transforming growth factor-alpha, L-selectin, growth commitment of the 19S proteasome complex, leading to the subsequent proteasomal degradation c

es of growth factors and tumor necrosis factor-alpha by regulating the intracellular concentration of cell-cycle progression from G1 to S phase. The E2F1:DP complex appears to mediate both. thora of physiological and pathological processes including cell cycle arrest in epithelial and hepatic space and as a boundary between the compositionally distinct apical and basolateral plasma membrane, activation, growth and motility. This encoded protein is a cell surface glycoprotein that is linked to TNF-alpha-induced apoptosis, which suggests that it regulates TNF-alpha function by antagonizing

is an inhibitor of cyclin-dependent kinases. Apoptosis induction seems to be mediated either by

the cytosolic 5S rRNA. Only the nascent unfolded cytoplasmic form is able to bind to the 5S rRNA

dine, 5-bromouridine, N(4)-acetylcytidine, N(4)-benzoylcytidine, 5-fluorocytidine, 2-thiocytidine, similarity). Plays an important role in the intracellular motility of vaccinia virus by functioning as a cofactor; the initial CG dinucleotide can be methylated greatly reducing the binding affinity. The effect may play a role in signal transduction that leads to the production of interferons in response to viral infection. Ubiquitylation and microtubule function in neurons. LRP8 has higher affinity for Reelin than VLDLR.

Ubiquitylation via apoptotic signaling pathway involving CASP8 and CASP3 activation, and poly(ADP-ribose) synthesis.

Cell membrane, and thereby increases channel activity (By similarity). Promotes potassium channels (EBOV), Dengue virus (DENV), West Nile virus (WNV), human immunodeficiency virus type 1 (HIV-1), and influenza A virus (IAV) entry into cells. Promotes phosphorylation and palmitoylation of the G-protein. Negatively regulates mu-opioid receptor-mediated signaling (304). Has no apparent extracellular phosphatase activity and therefore most probably acts intracellularly. Promotes the hydrolysis of catabolic uridine and the generation of purine-2',3'-cyclophosphate-terminated oligoribonucleotides.

Androgens and progestins with their cognate inactive metabolites. Preferentially transforms androstenedione to testosterone. Also involved postnatally in the subventricular zone (SVZ) neurogenesis by regulating the Wnt signaling pathway by mediating poly-ADP-ribosylation (PARsylation) of AXIN1 and AXIN2, and by promoting the ubiquitylation of AXIN1.

Cell adhesion, cell motility on or towards fibronectin possibly by driving alpha-v/beta-1 integrin (ITAGV-ITGB1) cell surface expression.

Protein ligase complex which mediates the ubiquitylation and subsequent proteasomal degradation of substrates.

Resistance to cell stress, such as starvation or gemcitabine treatment.

Signaling cascade, promotes the formation of spines and synapses in hippocampal neurons.



phoadenylylsulfate (PAPS: activated sulfate donor used by sulfotransferase). In mammals, PAPS

r degree, however tyrosine kinase activity is unclear and may be indirect. May be a downstream

finity pyruvate transporter.

and hematopoietic stem cells. Receptor for collagen III/COL3A1 in the developing brain and in  
the CNS including neuronal maturation and axonal and myelin formation (By similarity).

ociated with TGF-beta receptor internalization.

by direct interactions with regulatory proteins and serves as a scaffold for the assembly of a fur  
ys a regulatory role in the processing of the amyloid-beta A4 precursor protein (APP) and acts

or cell survival by mediating the influx of HCO<sub>3</sub><sup>(-)</sup> into the cells. Also mediates lithium-depender  
ursors. Digests the poly-Q peptides found in many cellular proteins. Digests tau from normal br  
n intraluminal vesicles (ILVs) that are generated by invagination and scission from the limiting m  
L6. Recruited by ZBTB7A to the androgen response elements/ARE on target genes, negativel  
cing H<sub>2</sub>O<sub>2</sub> (By similarity). Acts as a key regulator of the SRF signaling pathway elicited by n

ap1 by direct association with Rap1-GTP thereby leading to the amplification of Rap1-mediated  
ved in collagen folding. Required for proper insertion of the first transmembrane helix N-termin  
iption factors to DNA. During cortical development, controls the neural stem cell pool by inhibiti

ng *S.typhimurium* infection and subsequent xenophagy (By similarity). Involved in repair of DN/

ase and mediates the ubiquitination of AURKB. Ubiquitination of AURKB by BCR(KLHL21) E3

aling through MAP kinases.

iation of large multiprotein complexes. Involved in muscle maturation by repressing transcriptio  
stimulatory effect on the ATPase activity of HSP70 in a dose-dependent and time-dependent n

PubMed:12618084). Can utilize both NADH and NADPH.

autophosphorylation on several serine and/or threonine residues. Phosphorylates and inactivates methylation of histone H3 lysine 4 (By similarity).

essential for synaptic vesicle maturation in a subset of excitatory/glutamatergic but not inhibitory/GABAergic neurons and the RGD motif. Vascular ligand for integrin receptors which may play a role in vasodilation.

binds to EBOV, Dengue virus (DENV), West Nile virus (WNV), human immunodeficiency virus type 1 RNA. Implicated in translationally coupled mRNA turnover. Implicated with other RNA-binding proteins in the context of viral RNA.

Efficiently phosphorylates 5'-AMP-activated protein kinase (AMPK) (PubMed:20381137, PubMed:24095279, PubMed:25936802). Forms heterodimeric Rag complexes with RGS9 GTPase-activating protein (GAP) activity, hence contributes to the deactivation of G-protein stimulated proliferation of neural progenitor cells (By similarity).

in second messenger system.

Active on odorants and seems to be involved in olfaction; it could help clear lipophilic compounds from the olfactory epithelium.

Possible targets include TRPV4.

Coordination of each mitotic event. This cyclin shows the highest similarity with cyclin G. The transcription factor.

participates in heparan sulfate synthesis by supplying UDP-Glc-NAc, the donor substrate, and thus binds to the heparan sulfate synthase.

WDR45 is involved in autophagosome assembly downstream of WIPI2, regulating the size of formed autophagosomes and thus triggers its entry into the cilia (PubMed:28625565, PubMed:28428259).

Has lower affinities for donors or acceptors than MGAT4A, suggesting a role in regulating the mature length of the middle and short rows of stereocilia (By similarity).

APP C99, a C-terminal APP fragment, abolishes C99 interaction with PSEN1 and thus APP C99 cleavage is inhibited.

and efficient translesion DNA synthesis (PubMed:24657165). Plays a key role in the transcripti  
d brain development. May participate in neurodevelopmental processes such as proliferation, r  
p of metabolic inactivation of leukotriene B4.

γ glucocorticoid receptor-mediated repression and induction and in androgen receptor-mediate  
B which can also be a component of the Mediator complex. Alternative splicing results in multip

nd mRNA (By similarity). Regulates formation of membrane ruffles and lamellipodia. Plays a ro  
teasome by opening the gated channel for substrate entry. Binds to the core proteasome via

ction with PICK1 (By similarity). May also play a role in neuron differentiation through inhibition

on-gamma activation and subsequent phosphorylation dissociates from the ribosome and asse  
for normal organization of the cytoskeleton, including the actin cytoskeleton, microtubules and  
r to a promoter of RET degradation (By similarity). May play a role in receptor clustering and cy  
itive regulator of telomerase. Has negative and positive effects on RNA polymerase II-depende  
CDC42BPB targeting to LIMK1 and the lamellipodium results in LIMK1 activation and the subs

tant in myotube formation (PubMed:22428023). Plays a role in lysosomal homeostasis (PubMe

rem to specific DNA-binding sites. Interacts with the upstream promoter region of the oxytocin i

substrates but rather calmodulin-binding motifs and is thereby antagonized by calmodulin. This  
eme (PubMed:24360805).

stone demethylases RIOX1 or KDM2B, leading to demethylation of H3K36 and recruitment of i

se pathway that regulates Golgi morphogenesis and dendrite patterning in brain (PubMed:2157

Med:17234884, PubMed:17875940, PubMed:23708001, PubMed:23708605, PubMed:1692102

inhibits BMP2-mediated differentiation of osteoblasts (in vitro) (PubMed:27036124). Acts as inh

A with the sequence 5'-CGATACAA-3' (or closely related sequences) (PubMed:21924763). Pro

quired for proper regulation of SHH signaling (PubMed:27666822).

ice of cell polarity, and cell migration.

ity and palmitoylates NCDN thereby regulating its association with endosome membranes.

a complex that mediates N6-methyladenosine (m6A) methylation of RNAs, a modification that |

te. Preferentially sulfates in GlcA->GalNAc unit than in IdoA->GalNAc unit. Does not form 4, 6-

3/TRAF6 signalosome. This function probably serves as a brake to prevent excessive RLR sig

nal output of signaling pathways which regulate cell proliferation (PubMed:15251430, PubMed:

2, PubMed:25849773, PubMed:27462815). The eIF-3 complex associates with the 40S ribosor  
ohydrate and lipid biosynthesis, as well as cell growth and proliferation. AMPK acts via direct p

rys a role in cholesterol homeostasis. Influences plasma cholesterol levels through regulation o  
nscription factor. Binds to the oxygen responsive element of COX4I2 and represses its transcri

ion of STIM to efficiently turn off ORAI when the endoplasmic reticulum lumen is filled with the  
ethyltransferase SETDB1. The NLK-SETDB1 complex subsequently interacts with PPARG, lea

sion events and thereby promotes noncrossover repair by meiotic synthesis dependent strand  
dues long. Rapidly degrades 13-mer to a 9-mer and then stops. Preferentially hydrolyzes the r  
tains protein homeostasis and promotes cell survival through attenuation of endoplasmic reticu  
e Trex site and a 5'-TCA[AG][AG]TTNC-3' motif present in the MEF3 site of the muscle-specific  
orylation in the nucleus is required for U snRNA export complex assembly and export, while its  
; CLSPN.

Med:10748143). Also able to transfer galactose to galactosylceramide/beta-D-Gal-(1<->1')-Cer  
e proliferation and differentiation. Plays a role in modulating the response to steroid hormones

menogenesis (By similarity).

May play a role in adipocyte differentiation.

RPE, SNRPF and SNRPG that assemble in a heptameric protein ring on the Sm site of the sm  
teins in lysosomes. The primary defect in NCL disorders is thought to be associated with lysos

mer activity with COL1A1 (PubMed:18487197). Catalyzes hydroxylation of the first Pro in Gly-P  
s in presence of Mn(2+) (PubMed:29335528, PubMed:31127291). Acts as an exoribonuclease  
ging. Does not charge cell cycle E2s, such as CDC34. Essential for embryonic development. R

IV1 GAG-POL expression by inhibiting -1PRF (PubMed:30682371). Exhibits antiviral activity a  
esides, phosphorylation of phosphatidylinositol (PI) to phosphatidylinositol 4-phosphate (PI4P)

es. [provided by RefSeq, Jul 2008]

ner or respective retromer complex variants acting to prevent missorting of selected transmembranes located in vesicle formation and in uptake of lipid signaling molecules. The beta subunit may as

3 (GalNAc) residue of chondroitin. Also acts on core 2 mucin-type oligosaccharide and N-acetylgalactosamine along actin fibers, providing a novel link between actin cytoskeleton dynamics and intracellular

position using C18:1, C20:4 or C18:2-CoA as the acyl donor (PubMed:21173190). Also acts on

4. It is derived from the Latin roots 'circa' (about) and 'diem' (day) and acts as an important regulator of retromer-independent retrieval and recycling of numerous cargos such as integrin alpha-5/beta-1 from the limiting membrane of the endosome and mostly are delivered to lysosomes enabling degradation

(PubMed:12496252, PubMed:17675297). Mediates 'Lys-48'-linked polyubiquitination of RIPK3 leading to

5 ABCA3 (By similarity). By regulating both the proper expression and the degradation through ubiquitination (PubMed:14738735, PubMed:14699129). The NDC80 complex synergistically enhances the stability of FGFR1 that has been activated by FGF1 binding; this occurs most likely via the AP-2 complex

6 organophosphorus compounds. May contribute to cancer pathogenesis by promoting tumor

7 consensus kaiso binding site (KBS). Can also bind specifically to a single methyl-CpG pair and its presence is necessary for the translocation of CpG dinucleotides from early endosomes to late endosomes. Involved in regulation of the microtubule network, causing reorganization of microtubules into bundles

red for hindbrain axon midline crossing (PubMed:15105459).

re it is cleaved in a site-specific manner by resident proteases S1P/MBTPS1 and S2P/MBTPS

her lipids, such as various sphingosines (PubMed:11956206, PubMed:16269826, PubMed:197  
(PubMed:29911972). Catalytic activity of the complex is required for normal cell proliferation (f  
involved in deubiquitination of monoubiquitinated FANCD2 (PubMed:19075014).

an unmodified N-terminal Pro followed by a small residue, and has the highest affinity for the p

imb of a novel autoregulatory feedback loop (DEC loop) which differs from the one formed by t

ria. In collaboration with PRKN, isoform 2 may enhance cell viability and protect cells from oxid

ation through cleavage and ligation cycles.

of classical E2F transcription factors such as E2F1: component of a feedback loop in S phase

bMed:15907797, PubMed:22745828). Gives rise to a mixture of 16:1 and 18:1 unsaturated fat

meostasis by mediating mitochondrial calcium extrusion: calcium efflux is essential for mitocho  
cement of anchorage-independent growth, tumorigenic conversion, promotion of genomic insta

iated PLCB2 plasma membrane translocation and subsequent activation in leukocytes (PubMe

: manner. May be an important mediator of Rac signaling, acting directly downstream of both G  
; KCND3/Kv4.3 currents (PubMed:23576435). Isoform 4 does not increase KCND2 expression

angiogenesis by binding to the heparan sulfate proteoglycans involved in growth factor signalin

ty). May contribute to the osmotic regulation of cellular glycerophosphocholine (By similarity).  
; the degradation of PDCD1/PD-1; the PDCD1-mediated inhibitory pathway being exploited by

vn-regulates NQO1, leading to increased mitomycin c resistance.

ind regulating transcellular versus paracellular flow in different organs. Plays a specific role in e

gions. Also acts as O-mannosyl-transferase on other proteins such as PDIA3.

er; paragloboside), resulting in the synthesis of Lc(3)Cer and neolactopentaosylceramide (nLc

19951071). Acts as a negative regulator of macrophage-mediated inflammation by inhibiting m

ORC1 signaling pathway.

κ to the repair site and by promoting the complex nuclease activity (PubMed:26215093). Proba

e in the synthesis of complex glycosphingolipids. Binding of both phosphatidylinositol 4-phosph  
phate (IP3). DAG mediates the activation of protein kinase C (PKC), while IP3 releases Ca(2+)

anonical Wnt signaling pathway to increase expression of target genes. Also regulates the can  
gions. Also acts as O-mannosyl-transferase on other proteins such as PDIA3.

eration by mediating 'Lys-48'-linked polyubiquitination and subsequent degradation of AKT1 in ε  
t the base of the cilium and thus triggers its entry into the cilia (PubMed:28625565, PubMed:28

3161870).

s rearrangement of the actin cytoskeleton, but does not alter microtubule alignment.



s activation of an innate immune response by inducing the oligomerization and polyubiquitination

nt. May participate in cytokinesis by hydrolyzing PIP2 at the cleavage furrow.

phosphate) like the plasma membrane. Its membrane-bending activity might be important for  
q, Dec 2015]

ectodomains of glycan-modifying glycosidase and glycosyltransferase enzymes such as MGA  
TRs, but encoding the same protein, have been identified. [provided by RefSeq, Jul 2008]

lactokinase), GALT (galactose-1-phosphate uridylyltransferase) and GALE (UDP-galactose-4'-ε

variants have been described. [provided by RefSeq, Jan 2009]

s response such as DNA damage. In cytoplasm, acts as a nucleation-promoting factor for both

IF recruitment through its TIR domain (PubMed:12471095, PubMed:12539043, PubMed:14735

the regulation of mitochondrial respiration and mitochondrial DNA copy number maintenance (

ity). Attenuates actin stress fiber formation via inhibition of TESK1-mediated phosphorylation c  
pathway.

reverse transcription, it can induce the conversion of cytosine to uracil in the minus-sense sing  
sition in lens epithelial cells (By similarity).

receptor surface expression. In addition, the protein has been identified as a component of the

ucose levels.

genes (By similarity).

ent mechanism. However, its overexpression also produces a decrease of the ubiquitin-depend  
the cleavage furrow at the end of mitosis. Modulates endocytosis of cell-surface proteins, such  
hosphate. Also synthesizes ribose 1,5-bisphosphate. Has only low phosphopentomutase and  
d with autosomal recessive deafness. [provided by RefSeq, Dec 2012]

osome that recruits CDK2 required for centriole duplication (PubMed:26297806).

lglycine (fGly), occurs in the maturation of arylsulfatases and some alkaline phosphatases that

isible for vesicle formation, movement, tethering and fusion. The low intrinsic GTPase activity o

ates the alpha subunit of eukaryotic translation initiation factor 2 (EIF2S1/eIF-2-alpha) in response to stress and is essential for the survival of cells. It is involved in the regulation of cell cycle and cell death. It is also involved in the regulation of angiogenesis and is essential for the formation of new endothelial connections during angiogenesis (PubMed:19154719). During somitogenesis, it is involved in the regulation of the cell cycle and is essential for the formation of somites.

are involved in elongation of the phagophore membrane, the GABARAP/GATE-16 subfamily is

tion elongation (PubMed:28847961). Preferentially recognizes and cleaves monomethylated adenosine (m6A) sites in RNA. The primary transcript is cleaved by the Drosha ribonuclease (RNase) DROSHA.

m gene product, but they contain distinct C-termini due to frameshifts versus the downstream gene product.

ion and neuronal survival, hair follicle development and cycling, FSH production by the pituitary gland.

ion with CD6, as well as homotypic cell-cell contacts (PubMed:7760007, PubMed:15496415, PubMed:15496415).

and either glyceraldehyde-3-phosphate or glyceraldehyde, respectively. [provided by RefSeq, Jun 2015]. It is involved in the regulation of protein synthesis and triggers the assembly of stress granules (SGs). Angiogenesis is regulated by the expression of KIF17 to transport vesicles containing N-methyl-D-aspartate (NMDA) receptor subunit 1 (NMDAR1).

ic pH shifts the activation to more negative voltages (By similarity).

quired for its tumor suppressor function. The BRCA1-BARD1 heterodimer coordinates a divers from ssDNA and stabilizing RAD51-ssDNA filaments by blocking ATP hydrolysis. Part of a PAI

sduction pathways. In naive T-cells, inhibits VAV1 activation upon TCR engagement and impos renentially interacts with and activates CDK1 and CDK2 throughout the cell cycle.

nsporter.

enzyme for the phosphorylation of numerous nucleoside analogs widely employed as antiviral :

ane. Acts as a chaperone-like protein that protects the hydrophobic precursors from aggregatic

Rac by activating the Rac-specific guanine nucleotide exchange factor (GEF) activity. Acts as :

in plasma and may be a modulator/inhibitor of GH signaling.

lternative splicing results in multiple transcript variants encoding different isoforms. [provided b

romosomal stability. DNA accessibility is regulated via a complex set of post-translational modi sozymes catalyzing that reaction (By similarity).

on-canonical DNA structures such as single-stranded DNA. Can bent DNA and enhance DNA

vity. Major fetal growth hormone in mammals. Plays a key role in regulating fetoplacental deve to the insulin II gene RIPE3B enhancer region. May be involved in translation (By similarity). DN insulin secretion, nerve cell survival, embryonic axial development or bone growth, depending lated genes (ISG) by binding to an interferon-stimulated response element (ISRE) in their prom lters its pharmacological properties. It slows down the activation and the deactivation kinetics c

critical structure of a conserved arginine finger motif is provided in trans relative to the ATP-binding site. The critical structure of a conserved arginine finger motif is provided in trans relative to the ATP-binding site. The critical structure of a conserved arginine finger motif is provided in trans relative to the ATP-binding site.

However, upon interaction with CSPG4, it may be involved in degradation and invasion of type I collagen. It is also hydroxylated (-COSH) at its C-terminus by MOCS3. After interaction with MOCS2B, the structure is modified.

It is involved in VEGF-induced angiogenesis in coronary vessels and promotes blood clotting through its interaction with von Willebrand factor. Nodes of Ranvier on myelinated axons. Nodes of Ranvier contain clustered sodium channels that are essential for action potential propagation.

It is involved in preventing premature centrosome splitting during interphase by inhibiting NEK2 kinase activity.

It is involved in the transport of sphingomyelin and sphingomyelins (PubMed:8898203). Energy-dependent efflux pump responsible for the transport of various lipids.

It is involved in the maintenance of GABA-mediated synaptic inhibition. Its aberrant expression could contribute to the development of epilepsy.

It is involved in the elimination of RNA processing by-products and non-coding 'pervasive' transcripts, such as antisense transcripts. The EJC is a dynamic structure consisting of core proteins and several peripheral proteins.

It is involved in the formation of the pre-40S ribosome. It is composed of mobile elements that move relative to each other. RPB7 is part of the RNA polymerase II holoenzyme. It is involved in the ATP-dependent degradation of ubiquitinated proteins. The 26S proteasome plays a key role in the degradation of ubiquitinated proteins. It is involved in the formation of DNA for several proteins involved in long-patch base excision repair (LP-BER) (PubMed:11111111).

plays an essential role both in DNA replication and the cellular response to DNA damage (PubMed:100000000). It is a member of the family of ribosomal proteins. The protein, which contains a C2-C2 zinc finger-like domain that can bind

and modulates the effects of splicing regulators, like RBMX. Binds to the AG-rich SE2 domain in the SMN2 protein. Involved in renal Na(+) retention, renal K(+) elimination, salt appetite, gastric acid secretion, intestinal Na(+) transport, and hedgehog pathway, acting downstream of PTCH1 (PubMed:16024801, PubMed:9372240). Plays a role in p27kip and is involved in regulation of G1/S transition. Degradation of CDKN1B/p27kip also recruits one amino acid molecule together with two or three Na(+) ions and one proton, in parallel with a substrate specificity, with a preference for zwitterionic amino acids. It accepts as substrates all neutral amino acids (PubMed:100000000). Mechanistically, acts by increasing local Ca(2+) release from microdomains which is essential for

the function of the channel (PubMed:23333303, PubMed:25555158, PubMed:26912367, PubMed:28502770, PubMed:100000000). It is involved in accurate posterior sperm head localization of the complex. May anchor and regulate the activation rate of the calcium channel CACNA1C.

STX1A and SNAP25 are localized on the plasma membrane while VAMP2 resides in synaptic vesicles. Mainly functions in heterochromatin regions, thereby playing a central role in transcriptional regulation.

It is a member of the E gene. Represses expression of the T-cell receptor gamma gene in alpha-beta T-cell lineages.

It is a transcription factor 6 alpha (ATF6) which produces adaptive ER stress response factors (By similarity). Involved in LPS-independent inflammatory responses triggered by free fatty acids, such as palmitic acid. Acts as a receptor for attachment of lamin filaments to the inner nuclear membrane. May be involved in the regulation of the enzyme, resulting in the formation of a DNA-(5'-phosphotyrosyl)-enzyme intermediate. Isoform 5 also mediates cell death induced by a combination of interferon gamma and TNF.

Interacts with WDR48 to have a high activity (PubMed:18082604, PubMed:26388029).

It is a mechanism for attenuating protein synthesis (PubMed:9703499, PubMed:10330172, PubMed:100000000).

It is a member of the HSD17B8 family. Within the heterotetramer, HSD17B8 binds NADPH and is involved in the reduction of NADPH (PubMed:19571038, PubMed:25203508).



3) into phosphatidylserine (1,2-diacyl-sn-glycero-3-phospho-L-serine or PS) (LPSAT activity). Has also notes also activation of TBK1 and IRF3. Involved in the ubiquitination of erythropoietin (EPO) and

of 'Lys-11'-linked polyubiquitin chains and, to a lower extent, the formation of 'Lys-48'- and 'Lys-63'-linked polyubiquitin chains. Has also an essential role in 40S ribosomal subunit and kinetochore fibers of the mitotic spindle by acting as inter-microtubule bridge. The TACC3/ch-TACC3 complex is involved in the formation of kinetochore fibers of the mitotic spindle by acting as inter-microtubule bridge. The TACC3/ch-TACC3 complex is involved in the formation of kinetochore fibers of the mitotic spindle by acting as inter-microtubule bridge. The TACC3/ch-TACC3 complex is involved in the formation of kinetochore fibers of the mitotic spindle by acting as inter-microtubule bridge.

is involved in the formation of kinetochore fibers of the mitotic spindle by acting as inter-microtubule bridge. The TACC3/ch-TACC3 complex is involved in the formation of kinetochore fibers of the mitotic spindle by acting as inter-microtubule bridge. The TACC3/ch-TACC3 complex is involved in the formation of kinetochore fibers of the mitotic spindle by acting as inter-microtubule bridge.

is involved in the formation of kinetochore fibers of the mitotic spindle by acting as inter-microtubule bridge. The TACC3/ch-TACC3 complex is involved in the formation of kinetochore fibers of the mitotic spindle by acting as inter-microtubule bridge. The TACC3/ch-TACC3 complex is involved in the formation of kinetochore fibers of the mitotic spindle by acting as inter-microtubule bridge.

is involved in the formation of kinetochore fibers of the mitotic spindle by acting as inter-microtubule bridge. The TACC3/ch-TACC3 complex is involved in the formation of kinetochore fibers of the mitotic spindle by acting as inter-microtubule bridge. The TACC3/ch-TACC3 complex is involved in the formation of kinetochore fibers of the mitotic spindle by acting as inter-microtubule bridge.

is involved in the formation of kinetochore fibers of the mitotic spindle by acting as inter-microtubule bridge. The TACC3/ch-TACC3 complex is involved in the formation of kinetochore fibers of the mitotic spindle by acting as inter-microtubule bridge. The TACC3/ch-TACC3 complex is involved in the formation of kinetochore fibers of the mitotic spindle by acting as inter-microtubule bridge.

is involved in the formation of kinetochore fibers of the mitotic spindle by acting as inter-microtubule bridge. The TACC3/ch-TACC3 complex is involved in the formation of kinetochore fibers of the mitotic spindle by acting as inter-microtubule bridge. The TACC3/ch-TACC3 complex is involved in the formation of kinetochore fibers of the mitotic spindle by acting as inter-microtubule bridge.

is involved in the formation of kinetochore fibers of the mitotic spindle by acting as inter-microtubule bridge. The TACC3/ch-TACC3 complex is involved in the formation of kinetochore fibers of the mitotic spindle by acting as inter-microtubule bridge. The TACC3/ch-TACC3 complex is involved in the formation of kinetochore fibers of the mitotic spindle by acting as inter-microtubule bridge.



of double-strand breaks (DSBs). Its localization to DNA damage foci requires RNF8 and UBE2N  
ation, and facilitates apoptosis in response to exogenous stimulation.

ucleocytoplasmic interactions established by the LINC complex play an important role in the tra

in the presence of type II topoisomerases (PubMed:11136719). Early in neurogenesis, may pla  
elimination of RNA processing by-products and non-coding 'pervasive' transcripts, such as antis  
n D, progesterone receptor, nor glucocorticoid. Acts as a coactivator for estrogen receptor alph

RefSeq, Sep 2016]

d:10523320).

s formed by IL17A and IL17F as part of a heterodimeric complex with IL17RC (PubMed:18684  
h other, and this determines the overall permeability. CLDN15 forms tight junctions that media

quired for the formation of senescence-associated heterochromatin foci (SAHF) and efficient ser

If, but promotes the turnover of CDC20 and MCC on the APC/C, thereby participating in the re

n hypoxia-induced cell death of neuronal cells probably by promoting release of AIFM1 from mi  
er membrane. Acts as a chaperone-like protein that protects the hydrophobic precursors from a

uent degradation.

vation to form active metabolites. Sulfates dopamine, small phenols such as 1-naphthol and p-  
ider investigation for its potential diagnostic and therapeutic uses (PubMed:23922215, PubMec

ratio is reversed. Another difference between mammalian mitoribosomes and prokaryotic ribos  
nal transducer and activator of transcription 1-alpha) pathway. [provided by RefSeq, Aug 2013]

ratio is reversed. Another difference between mammalian mitoribosomes and prokaryotic ribos  
ed in the estrogen-induced cell proliferation and cell cycle progression of breast cancer cells.

x) complex. Probably shuttles between the presequence translocase and respiratory-chain ass

(By similarity). Methylates ETF1 on 'Gln-185'; ETF1 needs to be complexed to ERF3 in its GT  
Condensin-mediated compaction likely increases tension in catenated sister chromatids, provi  
core to the nascent glycoproteins. Multiple transcript variants encoding different isoforms have  
stabilizes presynaptic RAD51 and DMC1 filaments formed on single strand DNA to capture doubl

ce PTPN6/SHP-1 and PTPN11/SHP-2 via their SH2 domains that block signal transduction thro

drial ribosome assembly by regulating the biogenesis of the 39S ribosomal subunit (By similarit  
onylcarbamoyl-AMP (TC-AMP) to the N6 group of A37 (PubMed:22912744, PubMed:2880582  
by direct interactions with regulatory proteins and serves as a scaffold for the assembly of a fur

ratio is reversed. Another difference between mammalian mitoribosomes and prokaryotic ribos

1 chromosome 5.[provided by RefSeq, Jan 2009]

cifically with newly synthesized MT-CO2/COX and its copper center-forming metallochaperone

s and/or in the assembly of myofibrils into sarcomeres. Implicated in regulation of actin polyme

in RNA-mediated gene silencing (RNAi) by miRNAs. Binds capped RNAs (m7GpppG-capped f

ic transport of SHH signaling molecules within the cilium. Not required for ciliary assembly. Its i  
s. Acts as nuclear and cytosolic DNA sensor involved in innate immune response. Can sense r

.||Plays a role in apoptosis. Suppression of the anti-apoptotic members or activation of the pro-  
ne placenta.

s KCNH2 potassium channel activity by decreasing its cell-surface expression and interfering w  
: proteins between the cilia and plasma membranes. Involved in neuronal differentiation. As a p

sion until it is resolved during anaphase (PubMed:17218258, PubMed:23973328). Functions as

role in myogenic differentiation through activation of the stress-activated MAPK cascade.

TIMELESS and this complex regulates DNA replication processes under both normal and stres

d the release of microtubules from the centrosome following nucleation. Microtubule release fro

: complex (PubMed:16622420). Plays an important role in chromosome congression and in the  
native splicing results in multiple transcript variants. [provided by RefSeq, Jun 2017]

nds branched DNA: binds both single-stranded DNA (ssDNA) and double-stranded DNA (dsDN

ed by RefSeq, Sep 2008]

ase.

ed for localization of KIZ, AKAP9 and gamma-tubulin ring complexes (gamma-TuRCs) (PubMe  
lization at the photoreceptor-specific distal CC is essential for normal microtubule stability and i  
that stabilizes centriolar microtubules and inhibits microtubule polymerization and extension fro

proteins in neutrophils.

ticulum Ca(2+) concentrations. Upon mild variations of the endoplasmic reticulum Ca(2+) concentrations, preventing UV-induced degradation of ERCC6 by the proteasome. Interacts with the

d:10523320).

id APBA3.

ally to branched DNA structures and may associate with S-phase chromatin following formation dynamic (By similarity).

); complex. Acts in coordination with KNL1 to recruit the NDC80 complex to the outer kinetochore in the presence of type II topoisomerases.

systems. Essential for the inhibitory function of regulatory T-cells (Treg). Mediates FOXP3-mediated gate plays a role of an E3 and promotes the transfer of ATG8-like proteins from ATG3 to phospho

pendent. Further studies suggest that the protein is associated with ribosome biogenesis through

lication forks, and anchors RBBP8/CtIP to DSB sites to promote DNA end resection and ensui synthesized CENPA into centromeres.

acids with 12, 14 and 16 carbons with higher activity toward C16:0 acyl-CoAs. Catalyzes the synthesis of 5-beta-androstanes, 5-beta-pregnanes, 4-pregnenes and bile acids. May also reduce endoplasmic reticulum chaperone complex. Modulates the kinetochore-bound levels of NDC80 complex.

binds to mRNA upstream of the exon-junction complex (EJC) and is recruited in a splicing- and cap-dependent manner. The PAGR1:PAXIP1 complex is required for cell survival in response to DNA damage independent of p53. Expressed in the kidney.

synthesizes CENPA into centromeres. Plays an important role in the correct PLK1 localization to kinetochores. Promotes heterochromatin formation in pericentromeric regions, thereby playing a central role in the establishment of constitutive heterochromatin.

Interacts with RPE, SNRPF and SNRPG that assemble in a heptameric protein ring on the Sm site of the small nuclear ribonucleoproteins (snRNPs).

Location: [provided by RefSeq, Jul 2008]

Function: Regulates DNA replication initiation, regulating DNA replication initiation (PubMed:20129055, PubMed:20129056). Involved in DNA replication initiation. Within the BLM complex, required for BLM and TOP3A stability.

Interacts with H2AZ1-H2B dimer, thus shifting the equilibrium towards dissociation and the off-chromatin state. Involved in heme synthesis (By similarity).

Involved in calcium homeostasis (PubMed:30082715, PubMed:31191616). Does not show transport activity.

Interacts with cytosolic iron-sulfur protein maturation with cellular iron regulation (PubMed:23891004). Involved in the synthesis of O-mannosyl trisaccharide (O-mannose-6-phosphate-beta-1,4-mannose). Phosphorylated O-mannosyl trisaccharide is a carbohydrate.

d breaks (DSBs) sites on chromatin during DNA repair in response to stalled replication forks (F

ulate skeletal muscle differentiation and insulin secretion by pancreatic beta-cells. Involved in c

he SLX1-SLX4 structure-specific endonuclease that resolves DNA secondary structures gener  
that acts as a platform to connect RNA polymerase I with enzymes responsible for ribosomal p

position of the glycerol backbone (PubMed:19318427).

ation of the initiating cartwheel structure (PubMed:27185865). Required for the recruitment of c

ordinates faithful mitotic progression and completion of cytokinesis.

tion results in splicing defects and death in cancer cell lines (PubMed:28437394, PubMed:2830  
by direct interactions with regulatory proteins and serves as a scaffold for the assembly of a fur  
brane.

cific semaphorins, and its cytoplasmic domain is required for the activation of down-stream sig

ase spastic ataxia-3 (SPAX3). [provided by RefSeq, Apr 2014]

A repair. Required for efficient DNA double-stranded break repair.

.2 and nitric oxide (By similarity). May play a role in inhibition of proliferation and migration (Put

otides into or from the mitochondria.

.CPUFA synthesis (PubMed:30509349).

en, alpha-ketoglutarate and iron.

of target proteins.

e NPC.

d proteasomal degradation of proteins for which signal-mediated translocation to the endoplas

æen described. [provided by RefSeq, Sep 2010]

ation forks.

35). The NDC80 complex synergistically enhances the affinity of the SKA1 complex for microtu

cell adhesion and angiogenesis. It functions in filopodia formation, cell migration and tube formation. It is a member of the subfamily of piggyBac transposable element derived (PGBD) genes. The PGBD proteins appear to be widely expressed in various tissues and are considered as potential tumor markers.

Required for the recruitment of STIL to the procentriole and for STIL-mediated centrosome amplification.

Acts as a key regulator of acinar cell function, stability, and identity. Also required for normal organ development.

Involved in actin-dependent nuclear movement via association with transmembrane actin-associated protein 1 (TM6SF1). Also involved in the Hedgehog pathway by affecting the nuclear transfer of transcription factor GLI1; the function is dependent on the presence of TM6SF1.

Involved in microtubule dynamics leading to silencing of the spindle checkpoint (PubMed:17093495). The SKA1 complex is composed of SKA1, SKA2, and SKA3, which bind to microtubules as oligomeric assemblies (PubMed:19289083, PubMed:19360002). The complex functions to stabilize microtubules and prevent premature exit from metaphase.

(By similarity).

(By similarity). Ceramides generated by CERS6 play a role in inflammatory response (By similarity).

Plasma membrane. In polarized epithelial cells, involved in efficient trafficking of TGFA to the cell surface. Also involved in the function of multiciliated epithelial cells. Seems to recruit INT to basal bodies of motile cilia which subsequently anchor to the endoplasmic reticulum, where it serves as a substrate for N- and O-glycosylations by fucosyltransferases. Functions in the regulation of cell cycle progression.

Intracellular. There are no conserved sequences at the splice sites, but the intron is invariably located at the 5' end of the coding sequence.

Involved in the regulation of primary cilium assembly (PubMed:21620453). Following activation by NEK2 involved in disassembly of primary cilium during G2/M transition.



A repair, and their resolution is necessary for proper chromosome segregation (PubMed:19020000). Involved in trafficking of EGF (PubMed:20175130). Involved in transferrin receptor recycling. Regulates the trafficking of EGF (PubMed:20175130). Involved in transferrin receptor recycling. Regulates the trafficking of EGF (PubMed:20175130).

› complex.

› l-lysine, an intermediate in lysine biosynthesis (By similarity).

› it is not involved in BIK-dependent activation of caspases. Involved in life span control, probably

› can be either protein-coding or non-coding. The primary transcript is cleaved by the Drosha ribonuclease.



nilarity). Plays a role in the formation and stabilization of endoplasmic reticulum tubules (PubMed:23931759).

a different level of activity.

intermembrane space to provide PA for CL synthesis in the inner membrane (PubMed:23931759). In the second half-reaction, PSQPP undergoes heterolysis, isomerization, and reduction with NADPH. The inflammasome promotes its activation and CASP1-catalyzed IL1B and IL18 maturation and

into vesicles assembled at cell bodies for delivery into neurites and nerve terminals. The BLOC-

BIRC4 indirectly by activating the mitochondrial apoptosis pathway. After translocation to mitochondria, phosphorylation of RACGAP1 to allow recruitment of ECT2 to the central spindle. Acts as an activator of PKC and calcium fluxes has been seen for some family members, but it is not yet clear if it

can be either protein-coding or non-coding. The primary transcript is cleaved by the Drosha ribonuclease

and in nuclear movement and positioning. Probable anchoring protein which tethers the nucleus to the cell membrane and facilitates the release of sterol core and concomitant release of formic acid (PubMed:20149798, PubMed:8619637). Inhibits the first intron of the KRAS gene and inhibits its expression. ESXR1-C has the ability to inhibit cyc

modulated by fructose metabolites: GCKR with bound fructose 6-phosphate has increased aff

variants encoding different isoforms. [provided by RefSeq, Jul 2008]

primarily as negative regulator, but can also function as activator, depending on the context. Re downstream signaling cascades via the G(i)/G(o), G(12)/G(13), and G(q) families of heteromeric y). Weakly binds 25-hydroxycholesterol (PubMed:17428193).

the mobilization of SHTN1 and in the accumulation of PIP3 in the growth cone of primary hipp

1108).

cell junctions.

1. Antagonizes the PI3K-AKT/PKB signaling pathway by dephosphorylating phosphoinositides; regulator may also play a role in protection against oxidative and genotoxic stresses (By similarity); 31171830). Acts as an angiogenesis inhibitor: inhibits migration, proliferation and network formation; or TUBA1 and TUBB (microtubule subunits). Binds directly F-actin and regulates actin cytoskeleton; 3'-end formation. Component of the tRNA splicing endonuclease complex: phosphorylates

role on tumorigenesis, can also negatively regulate insulin secretion by inhibiting the activation of Ras and Rap. May be involved in certain forms of brain injury, leading to long-term learning deficits; AP activity (By similarity).

transporter involved in the transport of the cationic amino acids (arginine, lysine and ornithine) into the nucleus; regulation by controlling the conversion of early phagosomal compartments into late phagosomes

thereby activating the TORC1 signaling pathway (PubMed:26449471, PubMed:26586190). This

endonuclease III enzyme to produce an approximately 70-nt stem-loop precursor miRNA (pre-miRNA)

splice variant subject to nonsense-mediated decay is the predominant splice variant expressed

plays a pivotal role in the protein quality control system, ensuring the correct folding of proteins, the endonuclease III enzyme to produce an approximately 70-nt stem-loop precursor miRNA (pre-miRNA)

240, PubMed:17085480, PubMed:18703516, PubMed:18794347, PubMed:18794348, PubMed

is a pivotal role in the protein quality control system, ensuring the correct folding of proteins, the adaptation to ER stress in liver, by maintaining translation of CPE-regulated mRNAs in conditions of ER stress.

This gene is highly expressed in colon cancers and in a human basal-like breast cancer cell line. It is involved in apoptosis in chondrocytes, but can also promote cancer cell proliferation. Required for normal function in cortical pyramidal neurons (By similarity). Involved in homologous recombination (HR) process, inhibits the kinase activity of the cyclin D-CDK4 complex. Inhibits DNA synthesis by DNA polymerase as an inhibitor or an activator of cyclin type D-CDK4 complexes depending on its phosphorylation state.

is processed by RNase III enzyme to produce an approximately 70-nt stem-loop precursor miRNA (pre-miRNA).

Induces the formation of apical actin-dependent microvilli. Involved in the formation of a

721615, PubMed:3964259, PubMed:3732516). Can induce angiogenesis (PubMed:23469107,

ax to microtubules. Can block microtubule minus-end growth and reversely this function can be

dherens by interacting with ADAM10 and, in a PDZD11-dependent manner, with the zonula ad

Med:24726359).

310, PubMed:25786029, PubMed:27804176). Acts either as a transcriptional activator or repre:

metochore (PubMed:18072184). The presence of CENPA subtly modifies the nucleosome struc

e spindle equator and by aiding the establishment and maintenance of connections between ki  
gulating the activity of RB proteins during cell division and proliferation. May play a regulatory o

ses transcription (PubMed:20389281, PubMed:20562920). The N-terminal SNAG domain comp

[017]

ctive, but the enzyme does not need to possess an active kinase catalytic site for this to occur

the vascular response to injury (By similarity).

onuclease III enzyme to produce an approximately 70-nt stem-loop precursor miRNA (pre-miR)

May also regulate IRS1 and IRS2 signaling in insulin-producing cells.

(By similarity). Represses transcriptional activation mediated by CTNNB1 in the Wnt signaling

required for entry into S phase and cytokinesis. Phosphorylates BCL2L1, leading to regulate th  
entiated lymphatic endothelial cells. Plays an important role in postnatal angiogenesis, where it  
inetochores (PubMed:15548592). The NDC80 complex synergistically enhances the affinity of th  
onuclease III enzyme to produce an approximately 70-nt stem-loop precursor miRNA (pre-miR)

the ALPL promoter.

. [provided by RefSeq, Dec 2008]

onizes phosphorylation of YAP1. Acts as a transcriptional corepressor for SNAI1 and SNAI2/SI  
sion of target genes (PubMed:31527837).||Involved in global genome nucleotide excision repair  
re production/expression of TNF-alpha, oxidative stress, and endothelial dysfunction in type 2 c  
|| adhesion to the extracellular matrix via integrin-dependent signaling, by mediating angiotensi

alpha chain and a beta chain bridged by disulfide bonds. [provided by RefSeq, Jan 2010]

Med:24929359, PubMed:11923095). In contrast to proapoptotic SPHK2, has a negative effect  
vation.

mitochondrial membrane by preventing the release of apoptogenic molecules from the intermem  
egradation of NOS2 (PubMed:21199876). Acts as a bridge which links NOS2 with the ECS E3



ocarbons (PubMed:7961644). Involved in cell-cycle regulation (PubMed:12213388). Likely to p  
ining the structural integrity of the Golgi apparatus, possibly by mediating interactions with cyto

1 (By similarity).

scription factors that regulate pro- and antiapoptotic genes. Dephosphorylation of 'Ser-473' of *A*

esicles during the formation of the neuromuscular junction; stimulating lobuloalveolar budding ;

l epithelial soluble proteins (By similarity). May play a role in preventing corneal damage cause  
ding lipid metabolism and the inflammatory response. Acts as a receptor for heme which stimi  
in hematopoietic differentiation (PubMed:8096636).

but its full-length sequence has not been determined. This gene is closely linked to other CTL/  
egradation of NOS2 (PubMed:21199876). Acts as a bridge which links NOS2 with the ECS E3  
to protect telomeres from DNA degradation (PubMed:19854130). However, the CST complex t

ANKRD53 to the mitotic spindle and spindle poles. May participate in p53/TP53-regulated grow

lates ZAP70 at its activating 'Tyr-493' residue (PubMed:16461343). Dephosphorylates the immr

ory by regulating the Ras and Rap protein signaling: required for overactivity-dependent spine  
As are then degraded by two alternative mechanisms, namely exosome-mediated 3'-5' exonucl  
;157). Drives internalization of the apelin receptor (By similarity). Apelin-36 dissociates more ha

ration.

l in both binding and ATP-dependent remodeling of DNA. Stabilizes FANCM (PubMed:203474  
n embryonic stem cell identity. Compared to EZH2-containing complexes, it is less abundant in em

on of aberrantly long telomeres (PubMed:28082411). Also acts as a transcription regulator that

localization to lysosomes and its activation. Thereby, may indirectly regulate cell growth, proliferat

on endothelial growth cones in response to netrin (By similarity). It also acts as a dependence

ted within the enhancer/promoter of hypoxia-inducible target genes and hence inhibits HRE-dri

ation and telomere addition to DSBs via catalytic inhibition of telomerase. Reduces the proces

ce a protein product. [provided by RefSeq, Jun 2013]

to kinetochores. Involved in the response of gonadal tissues to follicle-stimulating hormone.  
Multiple alternatively spliced transcript variants encoding different isoforms have been found for

or: inhibits the hepatic acute phase response by preventing dissociation of the N-CoR corepress

ad to IL-8(1-77), respectively.

astoma RB1 protein. Inhibits DAXX-mediated apoptosis by inducing its ubiquitination and degra

omains. The encoded preproprotein is proteolytically processed to generate the mature enzyme  
sis via p38 MAPK signaling in muscle-specific and/or growth factor-related transcription. In cer  
local sites. Also binds to atypical chemokine receptor ACKR3, which activates the beta-arrestin

onal quality control mechanism. Polyadenylation with short oligo(A) tails is required for the deg  
mosome. The read-through transcript is a candidate for nonsense-mediated mRNA decay (NM  
tes leukocyte adhesion to endothelial cells (PubMed:23892569). Regulates migration of monoc  
ius regulating basal and evoked synaptic transmission. Crucial for normal neuronal developme  
d ribosomal protein S6 kinase (S6K) by the protein phosphatase PP2A (PubMed:25816751, Pl  
ouples DNA methylation and histone H3 'Lys-9' trimethylation (H3K9me3) activity (Probable).

stivation of phospholipid signaling.

ator of the canonical pathway and suppresses constitutive activation of non-canonical NF-kapp

onuclease III enzyme to produce an approximately 70-nt stem-loop precursor miRNA (pre-miR)  
rget protein, have different functions depending on the Lys residue of the ubiquitin that is linke

nding site of the Walker A box of the adjacent subunit. The six ATPase active sites, however, a

lated suicide of mature T-cells, or both. The secreted isoforms 2 to 6 block apoptosis (in vitro).

phosphorylating proteins are that already phosphorylated on a specific motif recognized by the POLO box domain and is a key regulator for the onset of cytokinesis during mitosis. Required for central/midline binding element (DBE) with consensus sequence 5'-TT[G/A]TTTAC-3' (PubMed:10358076). Acts

in cardiac myocyte differentiation. Regulates the circadian clock by repressing the transcription and differentiation of neuronal cell lineages in the brain (By similarity). May participate

in cardiac myocyte differentiation. Regulates the circadian clock by repressing the transcription

and binding to MCL1 and can displace BIM/BCL2L11 from its binding site on MCL1.

transfers to lysosomes. Also required for stability and nuclear trafficking of AKT1/AKT which promotes an antiproliferative activity via the up-regulation of cell cycle negative regulators CDKN1A/p21

cell migration and TGF-beta-induced epithelial to mesenchymal transition (EMT), potentially through cell membrane surface.

role plus end-directed motility.

Subsequent activation of the kinase AKT1. KITLG/SCF and KIT also transmit signals via GRB2 a

polymerase encounters the 5'-end of a downstream Okazaki fragment. Required for somatic hyp

ous bones of the skull (By similarity). May play a role in tumor suppression (Probable).

(By similarity). During spinal cord neurogenesis, inhibits V2a interneuron fate (PubMed:17728344).  
Inhibits adenylate cyclase activity. Regulates the release of 5-hydroxytryptamine in the brain, and

RNase III enzyme to produce an approximately 70-nt stem-loop precursor miRNA (pre-miRNA) and plays a major role in p53/TP53-driven oxidative stress response. Possesses both a p53

regulation of APC/C substrates by the proteasome and promoting mitotic exit.

Regulates myeloid cell differentiation by altering the expression of CEBPA in a COP1-dependent phase. Essential for proper chromosome segregation during mitosis and this function requires

charge barrier: the protein has a high net electrical charge and acts as a surfactant, dispersing vesicles (DCVs) and other dense-core vesicles (By similarity).

promotes stable microtubule-kinetochore attachments (PubMed:21402792). Required for kinetochore

binding to both poly- and mono-ubiquitin and regulates ligand-induced degradation of EGFR, thereby

however, in another study, does not appear to be implicated in repressor activity of a NRSE motif (9). Core component of the UV-DDB complex (UV-damaged DNA-binding protein complex), a complex

that participates in the transmission of nuclear signals during development and in the adult, as illustrated by

hematopoietic cells, control of mesenchymal cell proliferation and differentiation, wound healing, and

regulation; no demethylase activity toward H3K9me2, while it has high activity toward H3K27me2. Demethylase

activity, by participating in recruitment to androgen-receptor target genes, resulting in H3 'Lys-9' demethylation and CBL. Activates the AKT1 signaling pathway by phosphorylation of PIK3R1, the regulatory subunit

of cell stresses and induces cell cycle arrest and apoptosis in response to ER stress (PubMed:10832222).

SCN3A/Nav1.3, SCN5A/Nav1.5, SCN9A/Nav1.7, SCN10A/Nav1.8, KCNA3/Kv1.3, KCNH2, EAAT

Acts synergistically with NR5A1 on CYP17 transcriptional activity.

Recruits the complex PP2A into the cytoplasm, prevents the dephosphorylation of the AP-1 subunit JUN w

the DNA backbone by beta-delta elimination to generate a single-strand break at the site of the r

cell-cell junctions within striated muscle cells.

as determined by RefSeq, May 2012]

Accession: NM\_068751, PubMed:18511904, PubMed:9873047). Phosphorylates CREB1 and ATF1 in response to various stimuli. Multiple isoforms. A paralog of this gene which also has a trypsin-like peptidase domain, FAM1

acts as a Dicer-like nuclease III enzyme to produce an approximately 70-nt stem-loop precursor miRNA (pre-miRNA).||The PDCD1-mediated inhibition of SMAD3 then form a heteromeric complex with SMAD4 that translocates to the nucleus to regulate gene expression.||in chromatin modification: through its tudor-like regions and PHD-type zinc fingers, specifically

regulates signaling via G protein-coupled receptors and GNAQ. Plays a role in regulating the constrictor muscle gene expression. ACATCTG[GT][AC]-3' which contains the E box core, and acts by recruiting chromatin remodel

acts as a Dicer-like nuclease III enzyme to produce an approximately 70-nt stem-loop precursor miRNA (pre-miRNA)

predominantly produce interleukin-10 (IL10) (PubMed:10581077).||The PDCD1-mediated inhibition of SMAD3 then form a heteromeric complex with SMAD4 that translocates to the nucleus to regulate gene expression.||in chromatin modification: through its tudor-like regions and PHD-type zinc fingers, specifically acts as a Dicer-like nuclease III enzyme to produce an approximately 70-nt stem-loop precursor miRNA (pre-miRNA).||the testis-specific histone gene H1-6 (By similarity).

increases cell migration velocity but reduces directionality.

acts mainly as an activator of gene expression due to weak binding to corepressors (PubMed:10581077) and TF. May also function in lipid trafficking. Protects cells from spindle disruption damage. Fu

rotein reductase). Catalyzes the hydroxylation of carbon hydrogen bonds of atRA primarily at C

more positive voltages. The inward rectification is mainly due to the blockage of outward current  
al transduction of associated receptors by dephosphorylation of their downstream effectors. PI

ds to single-stranded DNA in an ATP-dependent manner to form nucleoprotein filaments which

Pase activity that converts bound GTP to GDP, thereby terminating the signal. Both GDP relea

onuclease III enzyme to produce an approximately 70-nt stem-loop precursor miRNA (pre-miR)

of the skin and for postnatal maturation and maintenance of the ocular surface. Involved in the  
tively regulates G1-to-S-phase transition of the cell cycle (PubMed:18959821). In endothelial c

orylation and nuclear accumulation, which causes cell cycle arrest (By similarity).

1, the two isoforms exert an additive effect. Isoform 2 regulates p53/TP53 expression and cellu

cells (PubMed:24623306). Binds to the USP28 promoter in colorectal cancer (CRC) cells (Put

of TGF-beta (PubMed:22278742). Able to outcompete LTBP1 for binding to LAP regulatory cf  
Jul 2008]



latory T-cells (Tregs) (Probable). Required during vasculogenesis (By similarity).

onuclease III enzyme to produce an approximately 70-nt stem-loop precursor miRNA (pre-miR) (By similarity). Together with DNASE1L3, plays a key role in degrading neutrophil extracellular traps (By similarity). Component of a PRC1-like complex that mediates monoubiquitination of histone H2A (By similarity).

and CTNNB1. Expression of dominant-negative mutants results in cell-cycle arrest in G1. Necessary for the Polycomb repressive complex 2 (PRC2) to major satellites (By similarity). Stimulates the

chore activities that depend on the kinetochore motor CENPE. Required for kinetochore localization and enrichment of AUKRB in prometaphase. Plays an important role in defining SGO1 localization and

as. Is thus essential for an accurate gametogenesis. May act by targeting PPP2CA to centromeres (By similarity).

gene silencing (By similarity). In association with DNMT1 and via the recruitment of CTCFL/BCOR, mediates

451).

expression of TFAP2A acts as a negative regulator of osteo-dentogenic capacity in adult stem cells; (By similarity).

density lipoproteins (HDL) more efficiently than other lipoproteins (PubMed:12032167, PubMed:12032168). Promotes maintenance of neuronal precursor cells and glial versus neuronal cell fate or identity. Promotes maintenance of neuronal precursor cells and glial versus neuronal cell fate or identity.

of many cells in vertebrates (PubMed:9624188). However, it may play a role in Wnt signaling (PubMed:29634919). Acts as a central dissolvase of membraneless organelles during the G2-t of target genes. The PHF2-ARID5B complex acts as a coactivator of HNF4A in liver. Require

rogrammed cell death following DNA damage. Stimulates both innate and acquired immune re

æ. [provided by RefSeq, Jul 2014]

(By similarity). Inhibits MYOCD activity. Is a negative regulator of TP53 acetylation. Inhibits NF-oss-links. Stimulates DNA decatenation mediated by TOP2A. Prevents sister chromatid exchar is invariably located at the same site in the gene, placing the splice sites an invariant distance izing pathway.

4570867). Binds APOA1 and may function in apolipoprotein-mediated phospholipid efflux from

similarity). Has been proposed to act as a cardiolipin hydrolase to generate phosphatidic acid æ 53/p73-induced cell death (By similarity). d nucleosome remodeling.

ruitment of the reductase to the ubiquitin ligase, AMFR/gp78. May play a role in growth and diff

'beta-catenin signaling pathway leads to the activation of disheveled proteins, inhibition of GSK

ing pathway involving PKC and calcium fluxes has been seen for some family members, but it is

robably by modulating channel properties (By similarity).

onuclease III enzyme to produce an approximately 70-nt stem-loop precursor miRNA (pre-miR)

ON, thereby inactivating mTORC1 and promoting nuclear translocation of TFEB and TFE3 (PubMed:235036).

and nucleosome remodeling.

with MCAM/MUC18, C/EBP alpha and MYC. AP-2-alpha is the only AP-2 protein required for early transcription factor activity. Binds to chromatin.

in hematopoietic cell adhesion to fibronectin and seems to contribute to the adhesion of hematopoietic cells.

gene expression (By similarity). Binds to BMP response element (BMPRE) DNA sequences within the promoter region.

duplication event 3 Mb distal to RANBP2. Alternative splicing has been observed for this locus and the protein is glycosylated with N-linked oligosaccharides, including sialyl N-acetyllactosamine (sialyl LacNAc) oligosaccharide (PubMed:12919066). Signaling leads to the activation of intracellular protein kinases and the phosphorylation of serine and threonine residues.

plays a role in dendrite formation by melanocytes (PubMed:23999003).

2) and histone H4 at 'Lys-20' (H4K20me1 and H4K20me2), leading to condense chromatin and activate expression of genes such as NFE2, ITGA2B, alpha- and beta-globin, while it represses expression on mRNAs. Does not hydrolyze cap analog structures like 7-methylguanosine nucleoside 1

may also play a role in cell adhesion (By similarity).

activity on 8-oxoG detected. Also shows weak DNA-(apurinic or apyrimidinic site) lyase activity

is in the heart (By similarity).

and opposite effects in numerous biological processes (PubMed:8626589, PubMed:15544348).  
kinases (PubMed:26246606). Required for normal spindle positioning during mitosis and for the

regions.

is its dephosphorylation. Positively regulates PDPK1 kinase activity by stimulating its dissociation.  
transcriptional activation of a subset of NOTCH1 target genes including MYC. Involved in thymocyte

on chromosome X. [provided by RefSeq, Jul 2008]

complex with the MutL alpha heterodimer, which is thought to be responsible for directing the downregulation  
of lipoxygenase (AA, C20:4(n-6)) to the hydroperoxy endoperoxide prostaglandin G2 (PGG2), and the

one of them leading to cellular transformation (PubMed:25642963, PubMed:25643323). POLQ is

:28846097, PubMed:28846098, PubMed:28846099). It then triggers the activation of neurons I  
bably plays a role in regulating protein degradation via its interaction with NEDD4 (PubMed:157  
104747).

onuclease III enzyme to produce an approximately 70-nt stem-loop precursor miRNA (pre-miR  
23. May be involved in regulating folliculogenesis. Through interaction with OCBA/POU2AF1, a  
of MAPK1/3 in local wound tissue, which further contributes to resolution of acute pain (By simi  
mplex (PubMed:15016378). Plays a role in immune response by modulating phagocytosis, infl:  
chromosome congression and alignment during mitosis through its interaction with KIF22.

or of S-phase by recognizing and binding the E2-related site 5'-TTCCCGCC-3' and mediating re  
onuclease III enzyme to produce an approximately 70-nt stem-loop precursor miRNA (pre-miR  
1 of reduced glutathione to cause a decrease in intracellular reactive oxygen species (ROS) cor  
regulation mediated by ESR1. Involved in mitochondrial depolarization and neurite outgrowth.  
65040, PubMed:18511070). Mechanistically, uses molecular oxygen inserting one oxygen atom  
nces the sequence-specific DNA-binding capacity of RUNX. The heterodimers bind to the core  
oth muscle cells than EGF. Also acts as a diphtheria toxin receptor.  
to generate pre-replication complexes (pre-RC)(PubMed:14672932). Required also for mitosis  
MOB1, which in turn phosphorylates and inactivates YAP1 oncoprotein and WWTR1/TAZ. Pho  
hydrogen sulfide, a gasotransmitter with signaling and cytoprotective effects on neurons (By si  
Regulates the subcellular localization of p53/TP53 and subsequent function (PubMed:1252679  
similarity).

otide dissociation inhibitor (GDI) activity towards G(i) alpha proteins, such as GNAI1 and GNAI3

ependent manner. Activates cofilin at axon tips via local activation of JNK, thereby regulating fi  
gative regulator of adipogenesis (By similarity). The AML1-MTG8/ETO fusion protein frequently

7/TCF1, thereby inhibiting transcription and modulates normal gamma-delta T-cell developmer

all nuclear RNA to form the core snRNP. In the cytosol, the Sm proteins SNRPD1, SNRPD2, S

ns, including lipid and bile acid metabolism, adipogenesis, gluconeogenesis and the macropha  
ll-cycle checkpoint activation, recombinational repair and maintenance of genomic stability. Rec

› an important regulator of global heterochromatin silencing and critical in maintaining genome  
il for the formation of bipolar spindles and high-fidelity chromosome separation) by phosphoryla

eiotic silencing of unsynapsed chromatin (MSUC) or meiotic surveillance.

and transports it into cells by endocytosis. In order to be internalized, the receptor-ligand compl

lls (ESCs). Specifically promotes SPRY1 and RSPO1 transcription activation through recogniti  
lyze either glycerophosphoinositol or glycerophosphocholine.

› nuclease III enzyme to produce an approximately 70-nt stem-loop precursor miRNA (pre-miR)

Γ-cells. Integrin beta-1 stimulation leads to recruitment of various proteins including CRK, NCK

duction of phosphatidylserine (PS) in spermatozoa membranes. Involved in acrosome reactions

binding of JAG1 to NOTCH2 but not that of DLL1 (PubMed:11346656). Essential mediator of son

GEF) for RAB5A, by exchanging bound GDP for free GTP, and facilitating Ras-activated recep  
CNMA1 channel that is detectable only at large depolarizations. In contrast, isoform 1 does no

on on adipocytes, but acts by stimulating several immune cell subtypes to enter the adipose tis

of T-cells and in innate immunity. Controls the proliferation and homing of CD8+ T-cells via the h  
and degraded in the cytoplasm by the BCR(KEAP1) complex (PubMed:11035812, PubMed:1561  
regulates many genes important for osteoclast differentiation and function (By similarity).

580347, PubMed:15713661, PubMed:15201869). May also regulate NF-kappa-B, ESR1, NR3C

ive been found for this gene. [provided by RefSeq, Jul 2010]

iment.

0684968]).[supplied by OMIM, Mar 2008]

'C-3 prostate cancer cells.

onse to growth factors, DNA damage, and ischemia. Plays a role in the regulation of cell survival

presence of primed DNA, replication protein A (RPA) and by proliferating cell nuclear antigen (PCNA)

RNA into the cytoplasm of neurons. Acts as a key regulator of synaptic plasticity: required for p

ent of VAV2, VAV3 and PI3-kinase p85 subunit by phosphorylated EPHA2 is critical for EFNA1

clustering at active zone to the presynaptic membrane in postmitotic neurons. CDC20-APC/C-i

orylates PARVA/actopaxin, APC, AMPH, APC, BARD1, Bcl-xL/BCL2L1, BRCA2, CALD1, CAS



ndent phospholipid phosphatase of the plasma membrane that catalyzes the dephosphorylation during mitosis (PubMed:25847991). May act as a tumor suppressor (PubMed:25847991). May stability and nuclear localization of FA core complex proteins, as well as for FANCD2 monoubic

mmation. Regulates cytoskeleton rearrangement and cell spreading in T-cells, and contributes

lability is insufficient (By similarity).

cyglycerides to free fatty acids and glycerol. Hydrolyzes of 2-arachidonoylglycerol and prostagl

rd promotes extension of the ciliary membrane. Firstly the BBSome associates with the ciliary r  
he function seems to require its catalytic activity. Involved in regulation of autophagy (PubMed:

on with DTX3L and in presence of E1 and E2 enzymes, mediates NAD(+)-dependent mono-AD  
deacetylation of lysine residues on the N-terminal part of the core histones (H2A, H2B, H3 and  
amically with various co-chaperones that modulate its substrate recognition, ATPase cycle and

cludes RNA binding.

rectly regulates neurite outgrowth (By similarity). Plays a role in myoblast fusion (By similarity).  
ephritis, including influx of monocytes and macrophages and production of extracellular matrix (the  
the lesion, the primer is further extended by the tetrameric POLZ complex. In the case of 1,2-di

PubMed:9462508, PubMed:10754304, PubMed:18193050, PubMed:23761635). Signals via the

Establishing boundaries between skeletal elements during development. Regulation of GDF6 expression, CCL8, CCL13, CCL19, CCL21 and CCL25. Chemokine-binding does not activate G-protein-mediated

regulation of excitatory synapses. Required to maintain wakefulness quality and normal synchronization

of chromosome fragile sites (CFS) stability in a RBBP6- and MCM10-dependent manner; represses expression

of genes (PubMed:28717008).

Functions also as an acyl-CoA retinol acyltransferase (ARAT) (By similarity). Also able to

act as

transcriptional regulator of genes controlling female reproductive function. May play a role in gene expression (PubMed:24100331, PubMed:23263184). The phosphorylation of EPRS1, induced by interferon- $\gamma$  (IFN- $\gamma$ ) from the corresponding diphosphate substrates with either ATP or GTP as phosphate donors

in the subsequent plus-strand viral DNA. The resultant detrimental levels of mutations in the

depend on corepressors, such as CTBP1 or CTBP2 and MTA1. The regulation of SIRT1 transcription

ral signaling protein (MAVS/IPS1) which activates the IKK-related kinases: TBK1 and IKKε w

xadecenoic acid (PubMed:22633490).

By similarity) (PubMed:22863753). May affect TLR4 signaling by acting at the level of TRAF6 t

a. While some claudin family members play essential roles in the formation of impermeable ba  
aling in tumor progression.

the early developing brain long before myelination, maybe as components of transcriptional cc

other GALNT proteins. Prefers Muc1a as substrate.

oxidation step from 6-deoxypenciclovir to penciclovir, which is a potent antiviral agent. Is probab

dietary Mg(2+) levels, and thereby contributes to the regulation of renal Mg(2+) reabsorption (f

ogenesis and is involved in spermatid maturation (PubMed:10373550).

ed; however, not all variants have been fully characterized. [provided by RefSeq, Jul 2008]

for short or long regions of sequence homology in the recombining DNA templates, and may a

similarity).

development and normal myelination in the spinal cord and cerebellum. Plays an important role in v

and long-term memory (By similarity). Plays a role in the actin and microtubule cytoskeleton on  
08]

gen I.||The gamma-CTF peptide, C30, is a potent enhancer of neuronal apoptosis.

G-I-mediated antiviral signaling in an RNA length-dependent manner through ubiquitination-dep  
nin pathway (canonical Wnt signaling pathway) in a CCAR2-dependent manner by sequesterin

IFN-beta) (PubMed:18724357, PubMed:18818105, PubMed:19433799, PubMed:19776740, P

se contributing to the generation of action potentials. Regulates smooth muscle cell proliferatio

by permitting water to move in the direction of an osmotic gradient. Slightly permeable to urea ;

information. The beta-arrestins target many receptors for internalization by acting as endocytic

dendrite morphogenesis and axon targeting in the vertebrate visual system, thereby playing a

lation which negatively regulates pro-inflammatory cytokine production in macrophages in resp

on the 3'UTR of ITGA3. Binds to CUG triplet repeat expansion in myotonic dystrophy muscle cell

differentiate in type 1 effector cells (TH1), type 2 effector cells (TH2) and IL17 producing helper T-cell

complex DCP1-DCP2 through RNA helicase p72 (DDX17) to remove the cap structure of the vir

id:27534431). Plays a role in the activation of innate immune response during viral infection. M

or used for glycolytic ATP production. The transition between the 2 forms contributes to the con

nic-aprimidinic (AP) endonuclease and 3'-5' exonuclease activities in vitro. Also able to introdu

ane, apparently linked to the ABCA1-mediated cholesterol secretion pathway. Recruits CYTH1

ade (PubMed:19109178). Negative regulator of Notch signaling pathway involved in embryonic

tern of sulfation of heparan sulfate. Compared to other NDST enzymes, its presence is absolut

strate is a carbohydrate structure present in alpha-dystroglycan (DAG1), which is required for b

tion of MMP15. Involved in the formation of the fibrovascular tissues in association with pro-MM

17145758). Moreover, is involved in the metabolism of aggrecan (By similarity).

ys a role in B-cell development, proliferation, migration, and function. Required for B-cell recept

1' of histone H4 (H4K91ub1) (PubMed:19818714). The exact role of H4K91ub1 in DNA damag

o the actin cytoskeleton. May be involved in signal transduction from cell adhesion sites to the r

oxylate long and very long straight chain acyl-CoAs or 2-methyl- and 4-methyl-branched acyl-CoAs (PubMed:255211). Plays an important role in the control of melanin production and melanosome biogenesis.

Is for the leukocyte adhesion protein LFA-1 (integrin alpha-L/beta-2). During leukocyte trans-endothelial migration, it forms a complex that recognizes UV-induced DNA damage and recruits proteins of the nucleotide excision repair pathway.

Provides docking sites for downstream signaling molecules. Following activation by ligand, interacts with intrinsic GTPase activity. GTPase activity is increased by contact with 60S ribosome subunit.

Involved in cell growth and survival by binding growth factor GAS6 and which is thus regulating many physiological processes. The B sites in the DNA of their target genes and the individual dimers have distinct preferences for

specific cleavage sites. Also important in the quality control of protein N-myristoylation in which N-myristoylation is essential for the function of many proteins.

Involved in tumor metastasis. Kp-10 is a decapeptide derived from the primary translation product, isolated from a human melanoma cell line (PubMed:15544348).

Involved in cell migration, PubMed:25315659). Regulates lipopolysaccharide (LPS)-induced endothelial cell migration (PubMed:15544348).

Involved in clathrin-mediated endocytosis independently of the AP-2 complex. Involved in endocytosis of integrins and growth factor receptors (PubMed:15544348).

Also plays an important role in the biosynthesis of complex lipids (Probable). Can transmit mechanical forces across the nuclear envelope and in nuclear movement and positioning. Plays a role in controlling excitability in a number of systems, such as regulation of the contraction of smooth muscle cells. Involved in the transport of proteins to the Golgi in a lipid-raft dependent pathway (PubMed:16880211). Acts via MYD88 and TRAF6.

d the inflammatory response.

olig (By similarity).

of the lipoprotein lipase LPL, and thereby plays a role in the regulation of triglyceride clearance

PubMed:10464285, PubMed:9880569, PubMed:11682059). Activation of RNASEL leads to degradation of cell surface receptors PPARA transcriptional activity. Enhances estrogen-dependent transcription and subsequent activation. Activation of RNase L leads to degradation of cellular as well as

transactivation (PubMed:10454579, PubMed:25219498). Also involved in androgen receptor transactivation

is a substrate for VE-PTP and is required by it to stimulate VE-cadherin function in endothelial cells

and promotes extension of the ciliary membrane. Firstly the BBSome associates with the ciliary rootlet

BAF complexes. As neural progenitors exit mitosis and differentiate into neurons, npBAF complexes

involved in mitochondrion degradation of damaged mitochondria by promoting the formation of vacuoles in the G(1) phase. Hypophosphorylates RB1 in early G(1) phase. Cyclin D-CDK4 complexes are required for

al domains. The encoded preproprotein is proteolytically processed to generate the mature protein (1711). A fraction of the 2-oxoglutarate dehydrogenase complex also localizes in the nucleus and is found in non-neuronal cells (PubMed:15781252, PubMed:15775988). Acts as a negative feedback regulator of the association with DMN1L and stimulation of its GTPase activity in synaptic vesicles. May attenuate

component (p150-glued) DCNT1. Involved in membrane-transport, such as Golgi apparatus, late endosome and lysosome. Involved in the anti-inflammatory response of macrophages and positively regulates TLR-induced reorganization of actin cytoskeleton and focal adhesion dissolution.

ells to collagens, modulation of collagen and collagenase gene expression, force generation and  
e stimulation by CSPG4 of endothelial cells migration.

of Kv4 channels. Functional regulator of Kv1.5 channel. During long-term depression in hippocampus

's), with some preference for PtdIns(3)P (By similarity).

ALM) leading to the degradation of damaged proteins inside mitochondria. The physical interaction

and nucleosome remodeling. Has broad antibacterial activity. May contribute to the formation of tubules

in a second step, the cluster is released from ISCU, transferred to a glutaredoxin GLRX5, followed by

inositol 1,3,4,5-tetrakisphosphate (PubMed:9108392, PubMed:10764818, PubMed:8769125). Activates the  
ant stress-response pathway leading to cytochrome c release from mitochondria and caspase-3 activation

(PubMed:24368842). Regulates the levels of fatty acids that serve as signaling molecules and promotes

and nucleosome remodeling. Has broad antibacterial activity. May contribute to the formation of tubules

3F-beta-1 activation mediated by LRRC33/NRROS is highly localized: there is little spreading of

phosphatidylinositols, such as phosphatidylinositol (4,5)-bisphosphate (PubMed:28459430). Mediates signaling



orphogenesis during embryonic development. Plays an important role in wound healing, where

esses, including cell cycle progression, apoptosis, or DNA damage repair.

dues are sulfated. May function in the sulfation of sialyl N-acetyllactosamine oligosaccharide cl

could impair cellular functions, and by removing proteins whose functions are no longer require

romoter (By similarity).

oproteasome to cleave model peptides after hydrophobic and basic residues.

arity). Regulates the equilibrium between cell surface-associated and cell surface-dissociated c

,N-dimethyl-4,4'-bipyridinium); a widely used herbicide. Responsible for the secretion of cationic c

it the AP-1/SMAD site to regulate TGF-beta-mediated transcription. Has an inhibitory effect on  
activity and other activities relevant to asthma. Required for tonic airway smooth muscle contra

minogen activators and their endogenous inhibitors. May modulate cellular events, such as AP

ligase activity, and in concert with the heterodimeric ubiquitin conjugating enzyme complex UBI

are interlocked as it represses the expression of PER1/2 and in turn is repressed by PER1/2 and is essential for normal development of peripheral nervous system and skeletal muscle and for muscle survival. A 1.4 Mb region that is commonly deleted in diverse tumors. A related pseudogene has been identified in the same region. Plays a role in cell-cell junction assembly (By similarity). Plays a role in regulating monocyte transmigration involved in cell-cell junction organization and function. Essential for the centrosomal recruitment of key proteins that control the G(1) phase. Hypophosphorylates RB1 in early G(1) phase. Cyclin D-CDK4 complexes are recruited to the centrosome in G(1) phase.

Alternative forms have been found for this gene. [provided by RefSeq, Dec 2009]

involved in nucleosome remodeling.

Regulates transcription factor activity by antagonizing the repressive effect of PTB. Acts as both an activator and repressor of transcription. Its transcriptional activities are down-regulated by tyrosine kinase PTK6 (PubMed:10564820, PubMed:19561594).

Involved in the subsequent plus-strand viral DNA replication. The resultant detrimental levels of mutations in the plus-strand DNA are reduced through the cleavage of CGAS, rendering it inactive (PubMed:28314590). In apoptotic cells, cleaved by caspase-3. Inhibited by human cytomegalovirus US6 glycoprotein, which binds to the luminal side of the ER.

Inhibits the TSC2, which leads to the activation of the RHEB GTPase that potently activates the protein kinase mTOR.

Regulates intracellular calcium ion levels and enhancing MAPK1/MAPK3 activation (PubMed:10452968, PubMed:10452969).

(By similarity).

Involved in keratin filament then dispersing throughout the cytoplasm in terminally differentiating cells. The type II keratins are involved in the formation of the keratin filament network.

Involved in cilium assembly (PubMed:21211617).

Regulation of cellular lipid homeostasis may not be limited to macrophages. Prevents cell death by transcriptional regulation of lipid metabolism.

h receptors to bind and to be physiologically activated by both GPI-anchored ephrin-A and trar

sequence 5'-GTGXGCXGC-3' (PubMed:21767813). In the absence of endoplasmic reticulum (l  
gene have been observed in neurofibromatosis type 1-associated glomus tumors. Alternative

proliferation and survival. Recruited by ZBTB7A to the androgen response elements/ARE on t

ired for proper skeletal muscle differentiation by sequestering FGF2 in lipid rafts preventing its  
i. May inhibit PI3 kinase by binding to AGAP2 and impairing its stimulating activity. Suppresses  
ans (PubMed:25493333). Binding of alpha-beta TR to pMH complex initiates TR-CD3 clusterin

oute to mortality. Regulates the activity of the neutrophil proteases elastase, cathepsin G, prote

plexes. A TRIM21-containing SCF(SKP2)-like complex is shown to mediate ubiquitination of CE

se, may regulate p53/TP53 expression and mediate in part the CDKN2A anti-proliferative activit

eosomal histones H4 and H2A (PubMed:14966270). This modification may both alter nucleosc  
inding to the adapter protein SFN and by stimulating Akt/mTOR pathway (By similarity). Involv

ide headgroup (Ref.6).

es of nicotinic acetylcholine receptors (nAChRs) to prevent excessive excitation, and hence ne  
/ similarity).

lineage; this interaction preventing EBF1 to bind DNA and activate target genes.

3-trans double bonds into the 2-trans form in a range of enoyl-CoA species (By similarity). With conformational changes in the ribosome.

17344214). May mediate cellular responses to activated FGFR1, FGFR2, FGFR3 and FGFR4 (By similarity). May be involved in the formation and sorting of endosomal cargo proteins into MVBs. MVBs contain intraluminal vesicles.

Mediator of innate immunity NF-kappa-B by promoting TNF-alpha-mediated proteasomal degradation of I-kappa-B. May have specificity for the receptor tyrosine kinase EPHB1/ELK (PubMed:8070404, PubMed:7973638). Can

ation.

GTPase, converting inactive GDP-bound Rab proteins into their active GTP-bound form. ||[[Isoform 3]:

to miRNAs. May play a role during primordial germ cell (PGC) survival (By similarity). However, it is not a phospholipid, but glycerophosphocholine.

It consists of a central stalk and a peripheral stalk. During catalysis, ATP synthesis in the catalytic domain is

onuclease III enzyme to produce an approximately 70-nt stem-loop precursor miRNA (pre-miR) (PubMed:22607976). May be involved in endoplasmic reticulum stress-induced pre-e

Does not show subunit-specific AMPA receptor regulation and regulates all AMPAR subunits.

ies. Regulates the expression of specific genes involved in differentiation and survival within a (by similarity). Required during the transcriptionally active period of oocyte growth for the establis

ected to play important roles in signal transduction. Alternatively spliced transcript variants have neurites and nerve terminals.

onuclease III enzyme to produce an approximately 70-nt stem-loop precursor miRNA (pre-miR)

the recognition of pri-miRNA at dsRNA-ssRNA junction and directs DROSHA to cleave 11 bp a secretion by pancreatic islet cells through activation of this receptor.

nilarity). Involved in DNA synthesis during DNA repair (PubMed:20227374, PubMed:27573199)

strong preference for a specific histone mark, H3K18Ac, directly linked to control of gene expression and as heterodimer with CEBPB (PubMed:1741402).

gene expression. Its deletion enhances angiogenesis in vivo. Many experimental evidences de neural progenitors-specific chromatin remodeling complex (npBAF complex) and the neuron-spe

KIF7 and GLI2 at the ciliary tip for GLI2 activation (By similarity).

18521). It is required for transcription-coupled repair complex formation (PubMed:16916636). It is required to act in brain and pituitary gland to facilitate the loss of plasma volume, actions which complex is required for RAB32/38 activation (PubMed:26620560).

and plays a role in cardiac hypertrophy, VEGFA-induced angiogenesis, genotoxic-induced apoptosis.

at the intersection of the four duplex arms of the Holliday junction and to junction of replication fork of the Holliday junction (HJ) and to junctions of replication forks. Involved in HJ resolution and UBE2C/UBCH10 on APC/C substrates, enhancing the degradation of APC/C substrates by the

in the 5'- and 3'-splice site binding components, U1 snRNP and U2AF. Binds to purine-rich RNA (By similarity). Promotes assembly of stress granules (SGs), when overexpressed. Its activation occurs exclusively on 'Tyr-15' and phosphorylation of monomeric CDK1 does not occur. Its ac

regulator of a wide array of physiological functions including metabolism, sleep, body temperature and transport vesicles containing N-methyl-D-aspartate (NMDA) receptor subunit NR2B along microtubule

accessibility (PubMed:21282530). Binds to histone H3 trimethylated at 'Lys-9' (H3K9me3) or at 'L

D1. [provided by RefSeq, Dec 2017]

myocytes, adipogenesis and angiogenesis. Functions as an endoribonuclease involved in mRN

specifically to histone H3-containing nucleosomes at the centromere, as opposed to nucleosomes c  
nuclease III enzyme to produce an approximately 70-nt stem-loop precursor miRNA (pre-miRN

oneogenesis and glucose output by repressing PPARGC1A transcriptional activity on glucone  
nuclease III enzyme to produce an approximately 70-nt stem-loop precursor miRNA (pre-miRN

then progressively more methyl groups are incorporated into H3K27, H3K27me0 > H3K27me1 :  
to detach PLK4 away from PLK4:CEP92 complexes in early G1 daughter centriole and to reposition  
nuclease III enzyme to produce an approximately 70-nt stem-loop precursor miRNA (pre-miRN

ation activity and, together with NFKB1/p50 and RELA, is recruited to LCN2 promoters. Promc  
f histone H4 and nucleosomes (PubMed:24396869). H4 'Lys-20' trimethylation represents a sp

l 18:1 unsaturated fatty acids (PubMed:15610069). Plays an important role in lipid biosynthesis

vitamin D analog, into 1alpha,25-dihydroxy vitamin D3; this reaction occurs via enzymatic  
nuclear and viral gene expression in a phosphorylated and acetylated status-dependent manner

from NADH and succinate to molecular oxygen, creating an electrochemical gradient over the

regulator of a wide array of physiological functions including metabolism, sleep, body temperature

a broad range of proteins and it has been estimated that they may have approximately 200 to  
tion and guide them through the mitochondrial intermembrane space.

ion and survival. May play an important role in brain development and function, and in skeletal  
regulator of a wide array of physiological functions including metabolism, sleep, body temperature

of NF-kappa-B. Required for the activation of CASP8 in FAS-mediated apoptosis. Required for

11677242, PubMed:11739383). Has also been shown to be involved in MSH2 deacetylation (P

genes and cytokine mRNAs. Binds both to nuclear and cytoplasmic poly(A) mRNAs. Binds to p

-like growth factors, and may regulate the expression of genes involved in metabolism. [provided  
udes the association of TBP with TFIID subunits. Recruits RNA polymerase I to the rRNA gene

role in the primary cilium by controlling ciliary growth and phosphoinositide 3-kinase (PI3K) sig

order structures. This gene is a histone pseudogene found on chromosome 1. [provided by Ref  
ent and cooperates with the transcription factor 1 complex (PTF1) bound to the enhancer A ele  
romosome. The read-through transcript is a candidate for nonsense-mediated mRNA decay (I  
a central stalk and a peripheral stalk. During catalysis, ATP synthesis in the catalytic domain c



deficiency virus type 1 (HIV-1) and facilitates its capture by platelets (PubMed:16940507).||C-type  
nuclease III enzyme to produce an approximately 70-nt stem-loop precursor miRNA (pre-miR)

brane and involved in invasive cell migration. In T-cells involved in endosome-to-membrane rec

range that triggers signaling via guanine nucleotide-binding proteins (G proteins) and modulate

macrophages.

nuclease III enzyme to produce an approximately 70-nt stem-loop precursor miRNA (pre-miR)

le in embryo implantation and parturition through its ability to trigger prostanoid production (By

e and allopregnanolone (PubMed:23763432, PubMed:23161870).

l that is essential for normal brain growth and cognitive function, enters the brain (PubMed:260)

s, are known. [provided by RefSeq, Jul 2008]

udes the association of TBP with TFIID subunits.

granulation (PubMed:25171405). May also have serine/threonine protein kinase activity. Requ

gulator of a wide array of physiological functions including metabolism, sleep, body temperature

epithelium (By similarity). Acts as a regulator of cilium length, together with PKD2 (By similarity).

osomal proteins, there are multiple processed pseudogenes of this gene dispersed through the

sorption of calcium from the intestine. Plays dual roles in osteoclast differentiation and survival  
ed for their localization. Binds myristoylated GNAT1 and is required for G-protein localization a

amily 3, group C, member 1). This action blocks the glucocorticoid receptor from being activatec

synthesis (PubMed:10648783, PubMed:21854770, PubMed:23797032, PubMed:26089203, Pi

by NR1D1 and THRB (By similarity).

plasm and thus preserving mitotic spindle integrity. Prevents the formation of the STIL-CENPJ c  
io-group acceptor (in vitro).

y a central stalk and a peripheral stalk. During catalysis, ATP synthesis in the catalytic domain  
directly repressing cyclin-dependent kinase inhibitors, including the p27Kip1 promoter (By sim

onuclease III enzyme to produce an approximately 70-nt stem-loop precursor miRNA (pre-miR  
plex, C9orf72 and SMCR8 probably constitute the catalytic subunits that promote the exchange  
e transition from proliferating neural stem/progenitor cells to post-mitotic neurons requires a sw  
is selectively and stereospecifically stimulated by phosphatidylserine (PS). The flippase compl  
ty).

onuclease III enzyme to produce an approximately 70-nt stem-loop precursor miRNA (pre-miR

onuclease III enzyme to produce an approximately 70-nt stem-loop precursor miRNA (pre-miR

onuclease III enzyme to produce an approximately 70-nt stem-loop precursor miRNA (pre-miR

3916645, PubMed:17938197, PubMed:19111657, PubMed:19589784, PubMed:28437106). Als

tional transcription factors. Regulates the expression of SLC6A9, a glycine transporter which re

220 protein domains. Gene copy number variations in the human chromosomal region 1q21.1,

rate, and reducing the second into a water molecule, with two electrons provided by NADPH vi

onuclease III enzyme to produce an approximately 70-nt stem-loop precursor miRNA (pre-miR

In the ear, this may lead to a reduction in basilar membrane motion, altering the activity of aud  
ulation of cardiac contractility and to the maintenance of proper cardiac conduction activity prok  
Phosphorylation at Ser-628 during G1/S phase maximizes the deubiquitinase activity, leading to

ed:9635433, PubMed:14993212, PubMed:24064211). Inhibits histone acetyltransferase activity

onuclease III enzyme to produce an approximately 70-nt stem-loop precursor miRNA (pre-miR  
Pyridoxal phosphate (PLP) phosphatase, which also catalyzes the dephosphorylation of pyridc

tory to inhibitory synapses in hippocampal neurons. May reduce the amplitude of ASIC3 acid-e  
in-containing and oxidatively truncated phospholipids.

nacrine and bipolar cells in the developing retina (By similarity). Likely to play a regulatory role

onuclease III enzyme to produce an approximately 70-nt stem-loop precursor miRNA (pre-miR)

be needed to protect the cell from overactive protein degradation. Several transcript variants e

s substrate (PubMed:24981631). The thermodynamic coupling of the irreversible SDO and rev

amyloid-beta peptide-induced apoptosis (PubMed:11007892).

is recombination by recruiting the SMC1-SMC3 cohesin complex to double-strand breaks. The c

34968]).[supplied by OMIM, Mar 2008]

complex at the channel-forming translocon complex that mediates protein translocation across the membrane. It is phosphorylated by protein kinase C (PKC) and protein kinase A (PKA) and is a substrate for the RNA polymerase III enzyme to produce an approximately 70-nt stem-loop precursor miRNA (pre-miRNA).

[supplied by OMIM, Mar 2008]

phosphorylates and mediates phosphorylation of GLI2, activating it and promoting its nuclear translocation.

Transcription of the c-FOS promoter is inhibited by BRG1-dependent recruitment of a phospho-RB1-t

neuronal increase in neuronal production (PubMed:29856954). Acts by enhancing the Notch signaling pathway. Inhibited by L-threonine, tannic acid, and mercurials (mercury dichloride, mersalyl acid, p-hydroxymercuribenzoate).

of ganglia (DRG) neurons. Mechanistically, it weakens their interaction, thereby releasing the inhibitor, a central downstream effector for the meiotic program. Acts independently of retinoic acid (RA) to mediate both cell proliferation and TP53/p53-dependent apoptosis. Blocks adipocyte differentiation pathway involving endoplasmic reticulum (ER) export sites (ERESs) and ER to Golgi transport required for functional expression of L-type calcium channels that contain CACNA1D as pore-forming

by modulating mesenchymal cell responsiveness to BMPs. Upregulates BMPRII expression in

from NADH and succinate to molecular oxygen, creating an electrochemical gradient over the

transcriptional regulator for numerous genes, including some genes involved in cancer metastasis

pansion and differentiation of B lymphocytes into immunoglobulin-secreting plasma cells. Sec

EA5 most probably constitutes the cognate/functional ligand for EPHA5. Functions as an axon guidance factor. May be involved in glucose-stimulated insulin production in pancreas and regulation of insulin secretion. Binds and inhibits the catalytic activity of neuronal nitric oxide synthase. Promotes trans



back to the liver. Has a preference for plasma 16:0-18:2 or 18:O-18:2 phosphatidylcholines (Pt

DNA. Within the complex, may act as a scaffold.

involved in synaptic plasticity in neurons (By similarity). Involved in regulation of growth as eryt

of RNA polymerase II (RNAP II) (PubMed:9499409, PubMed:15563843). The activity of this co  
y increasing its affinity for the 3'-OH end of the primer-template and stabilizes POLB to those s

0684968]).[supplied by OMIM, Mar 2008]

teins, is also proposed to be involved in neurite extension. Plays a role in intracellular vesicle tr  
ition and self-renewal through the regulation of specific genes involved brain development, incl  
\_1 (By similarity). FGL1 constitutes a major ligand of LAG3 and is responsible for LAG3 T-cell i

ylglycerol (PubMed:28851360).

rowth factor-induced signaling. Alternative splicing results in multiple transcript variants encoding  
IDS-sensitive inorganic and organic anion transporter that mediates the uptake of monovalent

h adiponectin. Required for normal revascularization after chronic ischemia caused by severing

receptor, thus promoting PKB/AKT1 phosphorylation and transduction of the insulin signal. Signaling pathway downstream of the receptor is referred to as forward signaling while the signaling pathway upstream of the receptor is referred to as reverse signaling.

ion, LGALS3/galectin-3 down-regulation and NF-kappa-B inactivation. Regulates the redistribution of integrins.

Drosha/DGCR8 complex and RNase III enzyme to produce an approximately 70-nt stem-loop precursor miRNA (pre-miRNA).

occur. Plays a role in the establishment of the epidermal barrier on plantar skin.

cy (DH) domain functions as guanine nucleotide exchange factor (GEF) that modulates the GTPase activity of Rho GTPases.

ates lymphocyte-epithelial cell adhesion (PubMed:11772392). Enhances dendritic cell immunoregulation. Regulates the formation of clathrin-coated vesicles (CCVs) which are destined for fusion with the early endosome. Involved in the processing of various peptides including peptide hormones and pancreatic proteases. Also involved in the processing of various peptides including peptide hormones.

(PubMed:27745970). May suppress inflammation-related signaling in asthmatic airway epithelial cells.

[RefSeq, Jul 2011]

aid long-term establishment of adaptive and innate tissue-resident lymphocyte T cell types in non-small cell lung cancer. Regulates the expression of BCAR1 in response to integrin regulation. Activation of BMX by integrins is mediated by PTEN. Promotes mitochondrial apoptosis through downstream BAX/BAK1 activation and positive regulation of the Bcl-2 family. Involved in the regulation of the cell cycle machinery (PubMed:25106868). Functions by recruiting the CCR4-NOT deadenylase complex to target mRNAs for degradation.

is potentiated by tropomyosin. Interacts with actin, myosin, two molecules of tropomyosin and with the actin-myosin complex.

-9. Involved in the cleavage of huntingtin. Triggers cell adhesion in sympathetic neurons through a secretory signal essential for T-cell receptor (TCR)-mediated T-cell activation. Its binding to DPP4 is

essential for cell adhesion (PubMed:7528188). Engages, through its ectodomain, extracellular matrix components such as laminin after their synthesis and directing transport of the complex from the endoplasmic reticulum to the cell

membrane. Cell-cell anchorage is affected, leading to modulate neural stem cell quiescence. CDH2 may be involved in cell-cell adhesion. Associates with alpha-catenin forming a link to the cytoskeleton (PubMed:10861224). Acts in conjunction with

integrins in cell differentiation, the regulation of bone resorption, and is required for normal bone development.

CDH2 is a membrane protein of leukocytes. The interaction between both receptors also mediates the activation of integrins (PubMed:7689, PubMed:12917691). Contributes to the regulation of cell survival, proliferation and differentiation. Regulates myosin phosphorylation in both smooth muscle and non-muscle cells. In smooth muscle, CDH2 is involved in RNA, but not DNA polynucleotides. May play a role in RNA clearance at DNA double-strand breaks.

CDH2 is a membrane protein. Plays a role in maintaining the functional integrity of PKA-activated erythrocyte shape and membrane. Involved in the guidance of commissural axons, that form a major interhemispheric connection.

ponses and regulation of innate and adaptive immunity, and acts as a sensor for proteolytic enzymes. Interacts with alpha-2-antiplasmin SERPINF2 and SPRY2 (PubMed:14751930, PubMed:16223769, PubMed:16223769).

Increases circulating satiety hormones and reduces appetite-stimulating neuropeptides and inhibits the cis-trans isomerization of proline imidic peptide bonds in oligopeptides. Promotes muscle growth and myogenesis. Isoform 6 accelerates muscle differentiation in vitro.

Interacts with EGFC, and to a lesser degree VEGFA, thereby creating a positive feedback loop that enhances FAK1 phosphorylation, activation and targeting to focal adhesions. Involved in the regulation of cell migration.

(PubMed:1005688).||Ligand for tyrosine-protein kinase receptors AXL, TYRO3 and MER whose signaling pathway is involved in cell migration.

Participates in the regulation of cell division, transferring the gamma-glutamyl moiety to an acceptor amino acid to form a new gamma-glutamyl amino acid. Interacts with GLRA1. GLRA1 are activated by lower glycine levels than homopentameric GLRA1 (PubMed:8717357). Interacts with beta-hexosaminidase A for cleavage of N-acetyl-D-galactosamine and conversion to N-acetyl-D-glucosamine (PubMed:15240885, PubMed:12515866, PubMed:16202387). GNA12-dependent Rho signaling is involved in cell division.

Interacts with GPCR subtypes (including M2/M4 subtypes), dopamine receptors and opioid receptors. In addition to GPCRs, also participates in the regulation of transcription, depending on the context (PubMed:24943844). Acts as a transcriptional repressor and coactivator of transcription, depending on the context (PubMed:24943844). Acts as a transcriptional repressor and coactivator of transcription, depending on the context (PubMed:24943844).

Consensus sequence 5'-[AC]A[AT]T[AG]TT[GT][AG][CT]T[CT]-3' (By similarity). Proposed to play a role in cell division.

Protects cells against apoptosis (PubMed:14752510). Promotes apoptosis in response to cellular stress in endothelial cells (PubMed:19884327).

(PubMed:15123770).

Signaling is essential for NRG1-ERBB signaling (PubMed:20682778). ITGA6:ITGB4 binds to IGF1 and promotes cell growth. Antagonizes IRF1 transcriptional activation.

the cell rather than out of it. Their voltage dependence is regulated by the concentration of extracellular calcium. (3) phosphorylation of pp125-FAK and p80, (3) differentiation of keratinocytes.

Also stimulates bactericidal activity in infected macrophages by causing

methylation on 'Lys-9' (H3K9me3) or 'Lys-27' (H3K27me3) or when 'Lys-4' is monomethylated (H3K4me1). It is a scaffolding protein upon which distinct protein complexes are assembled in the cytoplasm and in the nucleus.

It has antifungal activity against papillomavirus infection. N-terminal region shows strong antifungal activity against

phosphorylation of FYN and PTK2/FAK1, and a transient increase in the intracellular calcium concentration. It is involved in growth factor-related transcription. Plays a critical role in the regulation of neuronal apoptosis. It is involved in the autophosphorylation of MET on its intracellular domain that provides docking sites for downstream signaling molecules.

It is involved in the regulation of histone H3 that is crotonylated (PubMed:25417107, PubMed:27105114, PubMed:27545619, PubMed:16286920).

It is a regulator of a wide array of physiological functions including metabolism, sleep, body temperature, and circadian rhythm.

It also plays a role as an intracellular G protein-coupled receptor involved in melanosome biogenesis and subsequent activation. Activation of RNase L leads to degradation of cellular RNA as well as viral RNA.

a subsequent autophosphorylation on several serine and/or threonine residues. Phosphorylate peptidyl alpha-hydroxylating monooxygenase (PHM) domain, is the copper-, ascorbate-, and O<sub>2</sub> phosphodiesterase with a dual-specificity for the second messengers cAMP and cGMP, which nutrient levels and under starvation. Plays a role in the generation of reactive oxygen species.

to be targeted around migrating leukocytes (PubMed:19342684). Trans-homophilic interaction in the asymmetric distribution of phospholipids in the canicular membrane. May have a role in transport of bile

E-derived ASARM peptide (PubMed:18597632). Promotes dentin mineralization and renal phosphate

Facilitates the transfer of a spectrum of different lipid molecules, including diacylglycerol, phospholipids, and cell migration (PubMed:12198496).

Recruits the proteasome to cleave model peptides after hydrophobic and basic residues. Involved in the generation of a red for normal incorporation of laminin into the extracellular matrix, and thereby for normal cell-cell interactions in osteoclast formation and function (By similarity).||Isoform 2 acts as a negative regulator of

cell proliferation. Plays a role in stimulating neurite outgrowth in response to the heparan sulfate proteoglycan

cytosis and growth signaling (PubMed:20005108). Key regulator of LPAR1 signaling and component of the

precursor forms of BDNF (proBDNF) and NGFB (proNGFB). Also acts as a receptor for neurotrophins

92674, PubMed:8195247). May be involved in the recruitment of monocytes into the arterial wall

in and mucosal surfaces under homeostatic and inflammatory conditions, as well as in pathological conditions

to a second site (site 2) in integrins which is distinct from site 1 and enhances the binding of other

proteins to the cell cycle phase and entry into the S phase (By similarity). In kidney development, inhibits tubule formation

protrusions, such as filopodia, and for cell motility and migration (PubMed:20393565, PubMed:21400000)

conditions (By similarity). Binds to the promoter region of the FOXP3 gene and promotes its transcription

cell cycle response, cell adhesion, cell cycle progression, apoptosis, migration, and transformation. Inhibits

in invadopodial function (PubMed:19109420).||[Isoform 2]: May be involved in modulation of fc

tional auto-repression (By similarity).

osomal localization and activity of Rag GTPases and thereby regulates mTORC1 translocation

nt DNA polymerase delta activity.

veral E3 ubiquitin-protein ligase complexes. May have E3 ubiquitin-protein ligase activity and pr

ubiquitinate histone H2A (PubMed:8132613).

ter leaflet of the membrane, linked to one of hundreds of different externally oriented oligosacc

rnatively spliced transcript variants encoding different isoforms have been found for this gene.

F), IL-1 and TLR4-induced NF-kappa-B activation in a dose-dependent manner. Overexpressic

velopment (PubMed:28381549).

ar actomyosin retrograde flow that is crucial to cell protrusion and migration (PubMed:1885416

T-cell-mediated immune responses. Promotes axon growth in the embryonic olfactory bulb. Pr

ave been observed for this gene. [provided by RefSeq, Feb 2011]

stimulates mRNA recruitment to the 43S PIC and scanning of the mRNA for AUG recognition. T

ress-induced apoptosis.

PubMed:15695813). May play a possible role in cell cycle regulation by contributing to cell cycle

autophagic degradation of cytoplasmic ubiquitin-containing inclusions (p62 bodies, ALIS/aggres  
:24788816). Recruits LRRK2 to the Golgi complex and stimulates LRRK2 kinase activity (PubM  
:cell:APC contact site so as to promote the actin polymerization required for synapse induction c  
atase (G6PC).

32 but not of TGFB3 (By similarity). May play a role in the regulation of alveolar generation.  
ic membrane transport pathway. Believed to act as a component of the putative CORVET endo  
atively regulates B-cell antigen receptor (BCR) signaling.

/) (PubMed:19808672, PubMed:28402439). Part of multimeric repressive chromatin complexes  
oming at sites of inflammation. Participates in biosynthesis of the SELL ligand sialyl 6-sulfo Lew

: synapses. Negatively regulates T cell activation by inhibiting the calcineurin-NFAT pathway. A  
rticipate in ApoER2-specific reelin signaling. Directly, or indirectly, regulates GLUT2 gene expres

ic effect of amyloid-beta peptide.

olved in the biogenesis of noncentrosomal, Golgi-associated microtubules through recruitment c  
in cell migration (PubMed:20679435).

art of the ANK2/RABGAP1L complex which is required for the polarized recycling of fibronectin  
ole as an adapter to assemble ZC3H12A, USP10 in a deubiquitination complex which plays a n  
lity to induce apoptosis.

ction through the activation of the JNK pathway in T-cells (By similarity).[[[Isoform 2]: May be in



0211). Acts via MYD88 and TRAF6, leading to NF-kappa-B activation, cytokine secretion and ti  
sults in multiple transcript variants that encode the same protein. [provided by RefSeq, Oct 201

: degradation of protein aggregates by interacting with p62/SQSTM1, ATG16L1 and LC3B/MAP2  
ates platelet aggregation induced by PDPN (PubMed:18541721). Through MSN or EZR interac  
riptional activation apparently by competing with other nuclear factors for binding to CBP. Also  
ssing tumor suppressor genes such as BRCA1 and HOXA5 (PubMed:24952722). In contrast,  
involved in enhancing the hepatic fatty acid oxidation in mitochondria (By similarity).

KIF5 to mitochondria for light chain-independent, anterograde transport of mitochondria (By si  
ns destined for lysosomal degradation from carriers to be recycled to the plasma membrane (P  
f adipocyte differentiation (By similarity). May bind to the 5'-GCCTGTCTTT-3' DNA sequence o

ARA to modulate lipid metabolism gene expression (By similarity). Is involved in adipocyte differentiation (PubMed:28218735).

telomeric DNA persists at the fusion points) and did not perturb TRF2 telomeric localization (PubMed:18270267). Upon activation of SHH, it is removed from primary cilia and is internalized into recycling endosomes, preventing cholesterol biosynthesis by increasing the transfer of squalene to a metabolic active pool in the cell.

differentiation and migration of neuronal cells during brain corticogenesis and for normal embryonic development with UNC5D, and possibly also other UNC-5 family members. Plays a role in fibroblast growth factor receptor signaling.

inhibits the N-terminal pyroglutamate formation of several amyloid-related plaque-forming peptides. Regulates the proteolytic processing of CLTRN in pancreatic beta cells (PubMed:21907142).

inhibits deoxyribonucleoside triphosphate (dNTPase) activity, which is required to restrict infection by viruses, such as HIV-1. Regulates canonical Wnt signaling: required to deliver RECK-bound Wnt7 to frizzled by assembling a high molecular weight complex.

inhibits cell cycle progression (PubMed:18270267, PubMed:25447204). With VAPA, may regulate ER morphology (PubMed:18270267), cell cycle progression, and engulfment of Salmonella. Component of the autophagy machinery that controls the degradation of organelles.

regulates their signaling activities. Negatively regulates mu-opioid receptor-mediated activation of the mitogen-activated protein kinase pathway.

is implicated in bone formation and bone disease, cancer and Alzheimer disease (By similarity).

regulates the cleavage of surface APP by beta-secretase to release sAPP-beta which is further cleaved and activates BAX-dependent apoptosis coupled to activation of caspase-9, -2 and -3. Involved in DNA damage response (PubMed:21741933, PubMed:24120868, PubMed:27829214). DNA damage or perturbation of ribosomes interacts with CYBA/p22phox. Regulates signaling cascades probably through phosphatases inhibition in other cell types (By similarity). Plays a role in ciliogenesis.

Involved in muscle differentiation, the regulation of AP-1 activity (plasma membrane bound AP-1 receptor complex with SOX9 (By similarity)). Plays a role in chondrocyte differentiation (By similarity).

Regulates internalization of TNFR. Promotes degradation of EGFR after EGF signaling. Stimulates the GTPase activity of C16-C18 unsaturated fatty acids (By similarity). It was suggested that it may also stimulate fatty acid synthesis by adding additional GalNAc moieties. Some peptide transferase activity is however not excluded, consistent with its ability to phosphorylate inositol 3-phosphate (PtdIns3P) through FYVE-type zinc finger (PubMed:11739631, PubMed:11739632). Promotes the degradation of amyloid-beta precursor protein). Specifically promotes the gamma-cleavage of APP CTF-alpha (a

regulates p53/TP53-mediated apoptosis in response to DNA damage via its effect on mTORC1 activity. Its cytoplasmic domain is phosphorylated HIFs are then targeted for proteasomal degradation via the von Hippel-Lindau ubiquitin ligase complex.

Plays a role in control of the ultradian cellular biological clock.

y 2013]

endent kinase inhibitor transcriptionally regulated by the p53/TP53 family to induce cell cycle ar

telomerase-positive cell lines.

es the radial migration of cortical neurons via an RTN4R-LINGO1 containing receptor complex

lity to localize to the PM based on the level of membrane cholesterol (By similarity). In lipid-poo

distal end of the USP12 fingers domain and induces a cascade of structural changes leading t

arocytes (PubMed:11975663). Involved in the response to oxidative stress by mediating deglyc

is a stable complex with the TGF-beta receptor-mediated phosphorylated SMAD2 and SMAD3

in: aberrant BTB dimer are then ubiquitinated by the SCF(FBXL17) complex and degraded by t

ed:23933751, PubMed:24660806, PubMed:24751536, PubMed:24784582, PubMed:24896175  
ing the protein kinase C and calmodulin signal transduction systems (By similarity).

12A3, by phosphorylation which appears to prevent membrane trafficking of SLC12A3. Also int

lycogen synthase and glycogen phosphorylase phosphatase activities of PP1. Dramatically inc  
oinositol phosphates (phosphoinositol 3-phosphate, phosphoinositol 4-phosphate and phosph

veral ZFP36-associated mRNAs, such as TNF-alpha and GM-CSF, in response to stress (Publ

d fetus with a suitable immunological environment throughout pregnancy. Both isoform 1 and is  
1 factors and minus-end stabilizers, thereby destabilizing microtubules at the adherens junction  
ne pyrophosphate transporter in colon, may mediate the absorption of microbiota-generated th

PubMed:22084099, PubMed:23152791). Modulates also STAT3 activity through negative regu

essential for a later stage in autophagosome maturation. Promotes primary ciliogenesis by remo  
omoting CDC42 activation at T cell leading edge membrane (PubMed:28028151). Is involved in

. Represses Wnt/beta-catenin-stimulated transcription, probably by targeting CTNNB1 to protei

2125). Involved in translesion DNA synthesis in response to DNA damage via its interaction with  
slow endocytic recycling of endocytosed proteins back to the plasma membrane. May indirectly

multiple transcript variants encoding distinct proteins. [provided by RefSeq, Jul 2008]

may be involved in the development of the placenta in vivo. May also have a role in ovarian de-

velopment. Alternative splicing results in multiple transcript variants encoding different isoforms. [provided by RefSeq, Jul 2008]  
Alternative splicing results in multiple transcript variants. [provided by RefSeq, Apr 2017]

through CACNA1E and stimulate programmed cell death (PubMed:15258581).

changing the internal signal transduction response of osteoblasts to external growth factors.

ad, but not its deubiquitinating activity (PubMed:17141156). Together with NSFL1C/p47, regula

on of receptor tyrosine kinase-coupled cellular responses induced by cell adhesion, growth fact

; ubiquitin-mediated proteasomal degradation (PubMed:24130170). Inhibits PPP1CA phosphat

sphorylates inositol 1,3,4,6-tetrakisphosphate (Ins(1,3,4,6)P4) (PubMed:12223481). Phosphory

ion and a cytoplasmic domain. Alternative splicing results in multiple transcript variants encoding  
enhances KSR2-mediated phosphorylation of MAP2K1 (in vitro). Blocks MAP3K8 kinase activity  
by RefSeq, Dec 2016]  
differentiation (By similarity).

tion, apoptosis and differentiation (PubMed:20207939). Has a better catalytic efficiency toward

chitin sulfate attached to the Ser/Thr- and Gly/Ser-rich regions. Also involved in modulation of gl

rich formation); ANXA1 (involved in membrane anchoring); DBN1, DBNL, CTTN, RAPH1 and E  
interaction with MICALL2. Links MICALL2 to the actin cytoskeleton and recruits it to the tight junc

displays broad nucleoside diphosphate kinase activity (PubMed:19073142, PubMed:19766732;  
of East Asians have the cytosolic isozyme but not the mitochondrial isozyme. A remarkably high



BACE1 trafficking and the control of amyloid-beta production (PubMed:27179792). In neuronal  
bMed:22848640).

ed on 'Tyr-142' (H2AXY142ph) at double-strand breaks (DSBs), recruiting other pro-apoptosis f  
n fibroblasts (By similarity).

etal-catalyzed oxidation of lipoproteins. APP42-beta may activate mononuclear phagocytes in th  
ound GTP.

play a role in the assembly of the V-type ATPase complex. In aerobic conditions, involved in int  
rating H3.3-containing nucleosomes. Catalytic component of the chromatin remodeling comple  
: is required for its tumor suppressor function. Also forms a heterodimer with CSTF1/CSTF-50 t

those of BCL7B and BCL7C. Two transcript variants encoding different isoforms have been f

as neuronal growth cone collapse (By similarity).||Important signaling molecule that activates sig

erythrocyte cytoskeleton required for the merozoite invasion (PubMed:28409866).||[Isoform 1]  
In either case, their spread as cell-free virions is restricted. Its target viruses belong to diverse 1

ty of RUNX. The heterodimers bind to the core site of a number of enhancers and promoters, in  
esion, enhances superantigen-dependent T-cell-mediated proliferation and costimulates T-cell

l differentiation, but is required for the proliferation of specific cell types (e.g. erythroid and hem  
action of MDM2 by blocking MDM2-induced degradation of p53 and enhancing p53-dependent

bMed:12047389, PubMed:17412999, PubMed:17407782). Does not require ATP (PubMed:11111111). A cytoskeletal fragment comprising the NC1 domain, inhibits aortic endothelial cell proliferation and causes atherosclerosis. [provided by RefSeq, Jul 2008]

Recruits cortical actin to the actin cytoskeleton at adherens junctions. In contrast, cortical actin was found to be excluded from adherens junctions in cells lacking p120<sup>cas</sup>.

Involved in memory-related synaptic plasticity in the hippocampus (By similarity).

Acts as a double-strand break (DSB) repair factor: recruited by BLM and mediates the cleavage of 5'-flap DNA structures. Its activity is enhanced by ELMO1 (PubMed:8657152).

Acts as a cell adhesion molecule in epithelial cell adhesion. In association with FAP is involved in the pericellular proteolysis of the extracellular matrix.

Represses the expression of the renin/REN gene and the oxytocin-neurophysin/OXT gene. Represses the triiodothyronine receptor (TR) gene.

Differentially uses myristate, laurate, arachidonate and eicosapentaenoate as substrates. Both isoforms are involved in endothelin-1 secretion by regulating the levels of unesterified EETs (By similarity). Modulates prostaglandin synthase activity.

Also involved in the long patch base excision repair (LP-BER) pathway, by cleaving within the alpha-helical region of the DNA. Phosphorylates PLCG1, FRS2, GAB1 and SHB. Ligand binding leads to the activation of the protein tyrosine kinase.

Can promote endothelial cell proliferation, survival and angiogenesis in adulthood. Its function is regulated by the protein tyrosine kinase.

profile, interacting with inflammatory chemokines of both the CXC and the CC subfamilies but not identified by RefSeq, Jul 2008]

is a receptor expressed on fibroblasts, smooth muscle cells, chondroblasts, leukocytes, and certain

by RefSeq, Jul 2008]

and cell proliferation (PubMed:28541286, PubMed:28073925, PubMed:18378771, PubMed:2845

diversity of its substrates. In skeletal muscle, contributes to insulin regulation of glycogen synthesis

1. Acts as a coregulator for USF1 by binding independently two promoter elements, a pyrimidine  
among the enzymes involved in this pathway, the trifunctional enzyme exhibits specificity for long-chain  
involved in this pathway, the trifunctional enzyme exhibits specificity for long-chain fatty acids (PubMed:  
their function. Component of the BRG1-RB1-HDAC1 complex, which negatively regulates the (

cellularization, tumor angiogenesis and pathophysiology of ischemic disease. Heterodimerizes with  
a charged Asp or Glu residue at position 3 and a Tyr anchor residue at the C-terminus (PubMed:1  
HIV gag-pol (TPQDLNTML) and Nef (RPQVPLRPM) (PubMed:25808313). Displays self-peptides

is a neurotransmitter.

peptides (PubMed:8264621). May play a role in the early steps of spliceosome assembly and pre-r

ceptors, such as adenylate cyclase. Signaling inhibits adenylate cyclase activity. Arrestin family member  
by inhibiting skeletal muscle and cardiac myocyte differentiation and promoting muscle precursor

the phosphorylation of a number of proteins including JAKs, TYK2, STAT proteins and the IFN $\gamma$  receptor

binds IGF2. Acts as a positive regulator of T-cell coactivation, by binding DPP4.

-mediated cell proliferation and IL5 up-regulation by T-cells.  
s and natural killer (NK) cells (Probable) (PubMed:10653850).

s in embryonic stem cells. Does not have histone demethylase activity but regulates activity of v  
ations and at neutral pH, but becomes permeable to Na(+) at subphysiological K(+) levels and i

Med:15660133, PubMed:16230460, PubMed:18028908, PubMed:22328514, PubMed:2363367

all surfaces in a receptor-independent manner. Zona pellucida-binding protein which may play e  
1395745, PubMed:30140003). Catalyzes an important step in the biosynthesis of branched, cor

retic factor (ANF) (PubMed:2531377, PubMed:2972276). Displays UV-inducible elastase activi  
1. Ligand for integrin $\alpha$ 5 $\beta$ 3 on the surface of blood vessels.||Ubiquitous metalloproteinase th

synaptic modulator, signaling molecule, smooth muscle contractor and neuroprotectant. Its prc  
n is mechanically antagonized by MYH9.

quired for normal, polarized cilia organization in brain ependymal epithelial cells (By similarity).  
cular membrane trafficking and cell migration (By similarity). Required for the structural integrity

5, RELB, NFKB1/p105, NFKB1/p50, REL and NFKB2/p52. The dimers bind at kappa-B sites in  
itiation, proliferation and apoptotic programs (By similarity). Involved in bone remodeling and h

the activation of the transcription factor RUNX2. Regulates remodeling of the extracellular mat

of MEK phosphorylation. HCNP may be involved in the function of the presynaptic cholinergic

units and are essential for the stability of the intermolecular collagen cross-links (Probable).  
f infectious virus particles. The sumoylated isoform PML-4 restricts rabies virus by inhibiting viru

transcription activator for the ACOX1 and P450 genes. Transactivation activity requires hetero  
e to increased Ca(2+) levels, dephosphorylates and activates phosphatase SSH1 which result:  
bunit POLA2 and two primase subunits, the catalytic subunit PRIM1 and the regulatory subunit  
horylation of metabolic enzymes, and by longer-term effects via phosphorylation of transcrip

ade involving MAPK1/3 (ERK1/2) and RAP1GAP. Involved in cell proliferation and cell growth  
enesis. Also involved in angiogenesis through stimulation of endothelial cell proliferation, migra  
tation with GPC1 (via its heparan sulfate chains) targets PRNP to lipid rafts. Also provides Cu

ariety of signaling and cytoskeletal proteins. This gene is highly expressed in the spinal cord. S  
ensity of FGF signals in the extracellular space. Regulates the availability of insulin-like growth  
2.1.46). Saposin-C apparently acts by combining with the enzyme and acidic lipid to form an a  
ar membrane. May function in the cytoplasmic partitioning of proteins. The holoprotein funcio

so acts as a lipid phosphatase, removing the phosphate in the D3 position of the inositol ring fr

the actin cytoskeleton, formation and disassembly of focal adhesions and cell protrusions, cell  
ppo pathway, in a cell density-dependent manner. May function as a tumor suppressor.

higher than PLA2 activity (PubMed:19615464). Shows O-acyltransferase activity, catalyzing the t  
classical non-homologous end-joining (NHEJ). Functions downstream of the MRN complex and  
involved in ciliary assembly (DYNC2LI1, FOXJ1 and BBS4) and genes involved in ciliary motility

the function of BAD and DAPK1 (PubMed:9770464, PubMed:16223362, PubMed:17360704, Pu

SLC3A2 functions as sodium-independent, high-affinity transporter that mediates uptake of le  
rise of cytoplasmic Ca(2+) levels due to release of Ca(2+) stores from the endoplasmic reticul  
complex (PubMed:10078207, PubMed:29374058). Belongs to the neural progenitors-specific chron

ize and associate with ISGF3G/IRF-9 to form a complex termed ISGF3 transcription factor, that  
s like ethinylestradiol, equalenin, diethyl stilbesterol and 1-naphthol at significantly lower efficien  
require additional evidences in vivo.

hormone receptor, MUC1 and the amyloid precursor protein (PubMed:12441351). Acts as an i  
of transcription repressor complexes, thereby allowing cofactor exchange (PubMed:21240272).

ions of H<sub>2</sub>O<sub>2</sub>).

cell proliferation and apoptosis. Blocks adipocyte differentiation by repressing CEBPA binding  
matopoietic cells, control of mesenchymal cell proliferation and differentiation, wound healing,  
membrane domains of epithelial and endothelial cells. Necessary for lumenogenesis, and particu  
known to complex with integrins. This gene is expressed in different carcinomas. The use of a  
ionizing its biological activity.

y stimulation of BAX and FAS antigen expression, or by repression of Bcl-2 expression. Its pro-

NA.

5-methylcytidine, and N(4)-anisoylcytidine.

is an adapter for recruiting WASL to vaccinia virus.

Effect on transcription regulation is depending upon the context in which it binds and diverse mechanisms.

infection (PubMed:17392790, PubMed:23950712). Mediates 'Lys-63'-linked polyubiquitination of

. LRP8 is thus a key component of the Reelin pathway which governs neuronal layering of the

se) polymerase (PARP) cleavage. Has no hyaluronidase activity in embryonic fibroblasts in vitro

channel closure via a mechanism that does not involve physical obstruction of the channel pore (Put  
(HIV-1) and hepatitis C virus (HCV). Can inhibit: influenza virus hemagglutinin protein-mediated

activation of the G-proteins (By similarity).

intracellularly (PubMed:16467304). Also acts on N-oleoyl ethanolamine phosphate/N-(9Z-octadecenoic  
nucleotides (PubMed:31778653). In turn, RNase T2 degradation products promote the RNA-de

one (4-dione) to testosterone.

SVZ neuroblasts survival and ependymal wall integrity. May also mediate local repair of brain  
2 key components of the beta-catenin destruction complex: poly-ADP-ribosylated target proteins

surface expression via ERK1/2 inactivation. Cleaves E-cadherin in response to growth factor deprivation

degradation of target proteins.

S is the sole source of sulfate; APS appears to be only an intermediate in the sulfate-activation  
n target of Notch signaling pathway during eye development.

involved in regulation of cortical development, specifically in maintenance of the pial basement m

functional preinitiation complex with RNA polymerase II and the general transcription factors.  
as an inhibitor of the amyloid-beta peptide aggregation and fibrils deposition. Plays a role in the

it HCO<sub>3</sub><sup>-</sup> cotransport. May be regulated by osmolarity.

rain more efficiently than tau from Alzheimer disease brain.

membrane of the endosome and mostly are delivered to lysosomes enabling degradation of m  
ly regulates androgen receptor signaling and androgen-induced cell proliferation (PubMed:208  
erve growth factor and serum: mediates oxidation and subsequent depolymerization of nuclear

l signaling. Shows weak activity on HRAS. It is controversial whether RAPGEF2 binds cAMP ar  
us of TM4SF20 into the ER lumen, may act as a ceramide sensor for regulated alternative tran  
ing the switch from proliferative to differentiating progenitors. Beyond progenitor cells, promote:

A damage caused by ionizing radiation, which subsequently improves cell survival by decreasir

ubiquitin ligase complex may not lead to its degradation by the proteasome.

n of myocyte enhancer MEF2C. During muscle differentiation, it shuttles into the cytoplasm, all  
anner and hence acts as a co-chaperone of HSP70. Also reduces cellular toxicity and caspas



as the protein phosphatase SSH1, leading to increased inhibitory phosphorylation of the actin b

mediated synapses (By similarity). In collaboration with UNC13A, facilitates neuronal dense c  
ular development and remodeling (PubMed:10428823). May act as an adapter that mediates

(HIV-1) and vesicular stomatitis virus (VSV). Can inhibit: influenza virus hemagglutinin protein-  
cytoplasmic deadenylation/translational and decay interplay of the FOS mRNA mediated by the

PK) trimer, including that consisting of PRKAA1, PRKAB1 and PRKAG1. This phosphorylation  
n RRAGC or RRAGD and cycles between an inactive GDP-bound and an active GTP-bound fo  
rotein signaling initiated by D(2) dopamine receptors (PubMed:27677260). May play an importa

odorant molecules from the sensory epithelium.

script of this gene was found to be expressed constantly during cell cycle progression. [providex

e involved in growth factor signaling.

ing autophagosomes (PubMed:28561066). Probably recruited to membranes through its PtdIns

ing that, under physiological conditions, it is not the main contributor in N-glycan biosynthesis.

avage by gamma-secretase, most probably through stabilization of the direct interaction betwee

onal regulation of T lymphocyte development (By similarity).

migration and differentiation before synapse formation, and non-synaptic vesicular release of n

d induction (PubMed:17116691).

le transcript variants encoding distinct isoforms. [provided by RefSeq, Jul 2014]

le in axon outgrowth. Binds to F-actin but not to RNA. Part of the WAVE complex that regulate its C-terminus, which occupies the same binding sites as the proteasomal ATPases, opening tl

of the activity of N-type voltage-gated calcium channel (By similarity).

embles into the GAIT complex which binds to stem loop-containing GAIT elements in the 3'-UT the vimentin intermediate filaments (By similarity). Plays a role in endoplasmic reticulum-assoc /toskeletal polarity in the junction between T-cell and antigen-presenting cell (By similarity). Ma ent transcription.

equent phosphorylation of CFL1 which is important for lamellipodial F-actin regulation.

d:28128235). Involved in the regulation of endosomal protein sorting (PubMed:29368044).

receptor gene (PubMed:8932385, PubMed:16549056). May be a transcriptional enhancer in th

s is the case for the cyclins CCND2 and CCND3 which polyubiquitination and subsequent degr

the PRC2 complex that mediates H3K27me3 methylation, followed by de novo silencing. Recr

72988). Mediates ubiquitination and degradation of IRS1 in a mTOR-dependent manner: the C

29). During G1 phase, plays a role as substrate of APC-FZR1 complex E3 ligase (PubMed:298

inhibitor of monocyte chemotaxis. Can inhibit the growth or viability of normal cells but not transfo

promotes ESC self-renewal and pluripotency (By similarity).|Transcriptional repressor (PubMed:1

plays a role in the efficiency of mRNA splicing and RNA processing (PubMed:27602518). Plays

di-O-sulfated GalNAc when chondroitin sulfate C is used as an acceptor.

inhibiting (PubMed:23545497). Interferes with the TNFalpha-triggered NF-kappa-B pathway by in

15528276). Can suppress brain tumor angiogenesis through transcriptional repression of REL

ne and facilitates the recruitment of eIF-1, eIF-1A, eIF-2:GTP:methionyl-tRNAi and eIF-5 to for  
phosphorylation of metabolic enzymes, and by longer-term effects via phosphorylation of transc

of intestinal cholesterol absorption. May act as a scaffold protein by regulating NPC1L1 transpo  
sition under hypoxia conditions (4% oxygen), as well as normoxia conditions (20% oxygen) (Pu

appropriate Ca(2+) levels, and thus preventing the overload of the cell with excessive Ca(2+) ic  
ading to methylation of PPARG target promoters at histone H3K9 and transcriptional silencing.

annealing (SDSA) as well as disassembly of D loop recombination intermediates. Also disassembles residue Leu and peptides with a hydrophobic C-terminus, while it has weak activity toward peptidyl transferase (ER) stress and the subsequent induction of unfolded protein response (UPR) (PubMed:27111111); genes enhancer. Acts cooperatively with EYA proteins to transactivate their target genes through phosphorylation in the cytoplasm causes export complex disassembly. It is recycled back to

(PubMed:10748143). Globoside Gb3Cer is a glycosphingolipid of the globo series, one of the most abundant in the uterus. Required for normal response to progesterone in the uterus and for fertility. Med

all nuclear RNA to form the core snRNP. In the cytosol, the Sm proteins SNRPD1, SNRPD2, and SNRPD3 have a cytosolic storage function. [provided by RefSeq, Oct 2008]

pro-Hyp sequences where Hyp is 4-hydroxyproline (PubMed:18487197). Has no activity on substrates in mitochondrion, possibly by regulating ATP production and mitochondrial translation (PubMed:18487197). Required for UBD/FAT10 conjugation. Isoform 2 may play a key role in ubiquitin system and may

act against dengue virus (DENV) and can inhibit the replication of all DENV serotypes. May block the first committed step in the generation of phosphatidylinositol 4,5-bisphosphate (PIP2), a

brane cargo proteins into the lysosomal degradation pathway. The recruitment of the CSC to the membrane is dependent on the presence of phospholipids. Required for the proper folding, assembly and ER

glycosaminoglycan oligomer with a lower efficiency. Has weak or no activity toward keratan sulfate and heparan sulfate. Required for asymmetric spindle positioning, asymmetric oocyte division and

lysophosphatidylcholine, lysophosphatidylinositol and lysophosphatidylserine using C18:1 or C18:0

regulator of a wide array of physiological functions including metabolism, sleep, body temperature, and cell growth. (ITGA5:ITGB1) (PubMed:28892079). The recruitment of the retriever complex to the endosome is required for the degradation of membrane proteins, such as stimulated growth factor receptors, lysosomal enzymes, and

to its subsequent proteasome-dependent degradation; preferentially recognizes and mediates the

the endoplasmic reticulum-associated protein degradation pathway of these proteins plays a critical role in the regulation of cell cycle. The high affinity of the SKA1 complex for microtubules and may allow the NDC80 complex to track depolymerizing microtubules. Promotes the localization of SACM1L at endoplasmic reticulum-plasma membrane contact sites

for cell migration.

can bind hemimethylated DNA but with a lower affinity compared to methylated DNA (PubMed:14594945, PubMed:25123532). Required for the initiation of axoneme extension and localization to lysosomes, where TLR9 is located (PubMed:29130391).

Required for the initiation of axoneme extension and localization to lysosomes, where TLR9 is located (PubMed:29130391).

2. The released N-terminal cytosolic domain is translocated to the nucleus to effect transcriptional repression (PubMed:168031). Shows a greater preference for D-erythro isomer of ceramides (PubMed:16269826). Inhibits transcription of the PER and CRY transcriptional repressors (PER/CRY loop). Both these loops are interlocked and regulate circadian rhythms (PubMed:29911972). The CTLH E3 ubiquitin-protein ligase complex is not required for the degradation of the PER and CRY transcriptional repressors (PER/CRY loop). Both these loops are interlocked and regulate circadian rhythms (PubMed:29911972).

peptide Pro-Gly-Leu-Trp (PubMed:29632410). Binds peptides with an N-terminal sequence of the PER and CRY transcriptional repressors (PER/CRY loop). Both these loops are interlocked and regulate circadian rhythms (PubMed:29911972).

the PER and CRY transcriptional repressors (PER/CRY loop). Both these loops are interlocked and regulate circadian rhythms (PubMed:29911972).  
relative stress.

by repressing the expression of E2F1, thereby preventing p53/TP53-dependent apoptosis. Plays a role in the regulation of cell cycle progression (PubMed:15610069, PubMed:15907797). Involved in neuronal cell proliferation and differentiation (PubMed:15610069, PubMed:15907797).

ty acids (PubMed:15610069, PubMed:15907797). Involved in neuronal cell proliferation and differentiation (PubMed:15610069, PubMed:15907797).

ndrial function and cell survival, notably in cardiomyocytes (By similarity). Regulates rates of glycolysis, and inhibition of hematopoietic differentiation (By similarity).

PubMed:22065575, PubMed:23625927). Core component of the CTLH E3 ubiquitin-protein ligase complex (PubMed:22065575, PubMed:23625927).

protein-coupled receptors and phosphoinositide 3-kinase.

at the cell membrane (PubMed:18957440). Isoform 4 retains KCND3 in the endoplasmic reticulum (PubMed:18957440).

g (By similarity). Inhibits VEGFA-induced endothelial cell proliferation and migration. Seems to inhibit VEGFA-induced endothelial cell proliferation and migration (By similarity).

tumors to attenuate anti-tumor immunity and facilitate tumor survival (PubMed:30487606). May

embryonic development.

(5)Cer), respectively. Probably plays a central role in regulating neolacto-series glycolipid synth

macrophage production of inflammatory cytokines, probably through suppression of the MAPK si

by by regulating the localization of the MNR complex, indirectly regulates the recruitment of do

ate (PIP) and ARF1 are essential for the GlcCer transfer ability. Also required for primary cilium  
from intracellular stores. Required for acrosome reaction in sperm during fertilization, probably

onical Wnt/beta-catenin-dependent pathway and non-canonical Wnt signaling by acting as an in

axons: degradation of AKT1 prevents AKT1-mediated phosphorylation of GSK3B, leading to G  
428259). Involved in the early steps in cilia formation by recruiting the ciliary vesicles (CVs) to t

on of TRAF6, which leads to the activation of TAK1 and IKK through a proteasome-independent

the subsequent action of clathrin and adaptors in the formation of clathrin-coated vesicles. Inv

T5, B4GAT1 and B4GALT1 (PubMed:25354954, PubMed:25827571). Catalyzes the intramem

epimerase) (PubMed:30451973). Involved in the maintenance of the equilibrium between the b

1 branched and unbranched actin filaments. Activates the Arp2/3 complex to induce branched a

3303). Distinct protein-interaction motifs allow recruitment of the effector proteins TBK1, TRAF6

(PubMed:28295037).



of cofilin (PubMed:18216281). Inhibits TGFB-induced epithelial-to-mesenchymal transition in le

le-strand viral DNA, leading to G-to-A hypermutations in the subsequent plus-strand viral DNA.

: human centrosome. Alternative splicing results in multiple transcript variants. [provided by Ref

dent stability of BAX, a pro-apoptotic protein, ultimately leading to protection of cell death; But, n as APP and PRNP; this then modulates the secretion of APP and PRNP peptides. Promotes phosphoglucomutase activities.

use the hydrated form of 3-oxoalanine as a catalytic nucleophile (PubMed:12757706, PubMed

of RAB43 is activated by USP6NL. Involved in retrograde transport from the endocytic pathway

nse to low amino acid availability (PubMed:25329545). Plays a role as an activator of the integrin signaling pathway involved in maintenance of proper somite segmentation and proper numbers of somites and is essential for a later stage in autophagosome maturation (By similarity).

and dimethylated arginine residues of histones H2, H3 and H4 (PubMed:28847961). After initial processing by RNase III enzyme to produce an approximately 70-nt stem-loop precursor miRNA (pre-miRNA) from the gene coding sequence. [provided by RefSeq, Dec 2010]

gland, wound healing, extracellular matrix production, immunosuppression and carcinogenesis (PubMed:15048703, PubMed:16352806, PubMed:23169771, PubMed:24945728). Promotes T-cell proliferation (PubMed:19112008) and induces vascularization of normal and malignant tissues. Angiogenic activity is regulated by the protein unit NR2B along microtubules (By similarity).

se range of cellular pathways such as DNA damage repair, ubiquitination and transcriptional regulation. The 93kDa subunit is a component of the DNA double-strand break (DSB)-scaffolded HR complex containing RAD51C and which is thought to play a role in DNA repair.

Requires a requirement for CD28 costimulation for proliferation and IL-2 production. Also acts by promoting

and chemotherapeutic agents (PubMed:12808445).

Importin and guide them through the mitochondrial intermembrane space. The TIMM8-TIMM13 complex

is a direct regulator of actin dynamics by binding actin filaments and has both barbed-end actin filament

[by RefSeq, Apr 2015]

regulation of histones, also called histone code, and nucleosome remodeling. Required for chromatin

flexibility by looping thus providing a mechanism to promote activities on various gene promoters

development. IGF-II is influenced by placental lactogen. Also involved in tissue differentiation. Positive regulator of integrin binding protein specific to 5'-phosphorylated single-stranded guanine-rich sequence related to the 5' end of the 3' untranslated region of the 5' subunit. Inhibins appear to oppose the functions of activins.

Regulators (PubMed:11846977, PubMed:16846591, PubMed:16979567, PubMed:20049431). Acts as a positive regulator of the channel. Acts as a negative regulator of smooth muscle contraction by enhancing the calcium

rding site of the Walker A box of the adjacent subunit. The six ATPase active sites, however, a  
rding site of the Walker A box of the adjacent subunit. The six ATPase active sites, however, a  
rding site of the Walker A box of the adjacent subunit. The six ATPase active sites, however, a

collagen by melanoma cells.

ulfur is then transferred to precursor Z to form molybdopterin.||Catalytic subunit of the molybdo

ough the activation of platelets.

hat are crucial for the saltatory propagation of action potentials along myelinated axons. During

y at the centrosome.

ble for decreased drug accumulation in multidrug-resistant cells (PubMed:2897240, PubMed:9

the genesis and progression of lung carcinoma. Acts as an inhibitor of PPP1C.

sense RNA species and promoter-upstream transcripts (PROMPTs), and of mRNAs with proce  
nuclear and cytoplasmic associated factors that join the complex only transiently either during E

t of a subcomplex with RPB4 that binds to a pocket formed by RPB1, RPB2 and RPB6 at the b  
ole in the maintenance of protein homeostasis by removing misfolded or damaged proteins that  
d:15871698). The 9-1-1 complex stimulates DNA polymerase beta (POLB) activity by increasii

Med:9430682). In the cellular response to DNA damage, the RPA complex controls DNA repair and to zinc, can enhance the tumor suppressor activity of Ras-related protein 1A (KREV1). It is l

5' UTR exon 7 RNA. Binds to pre-mRNA.

+/H(+) exchange and nutrient transport, insulin-dependent salt sensitivity of blood pressure, and as an important role in the regulation of centriole duplication. Required for the onset of pro-centriole formation. Requires CKS1. Recognizes target proteins ORC1, CDT1, RBL2, KMT2A/MLL1, CDK9, RAG2, FUS, and with the counter-transport of one K(+) ion (PubMed:7521911, PubMed:8857541, PubMed:2669444). Transports central amino acids, including glutamine, asparagine, and branched-chain and aromatic amino acids. Required for the enhancement of ATP-induced exocytosis (PubMed:30404828). Acts also as a molec

Med:28781166, PubMed:28076346). Component of both the pre-catalytic spliceosome B complex and the SUN3 the nuclear envelope. Involved in maintenance of the nuclear envelope integrity. May as

vesicles. The pairing of the three SNAREs from the N-terminal SNARE motifs to the C-terminal motifs is required for the establishment of constitutive heterochromatin at pericentric and telomere regions. H3 'Lys-9

(By similarity). Required for the development of natural killer receptor-positive lymphoid tissue

nitrate, and Ni(2+). Responses triggered by Ni(2+) require non-conserved histidines and are, therefore, under the control of initiation of DNA replication through its interaction with NAKAP95. Thymopoietin (TPO) binds to the 3' end and the expulsion of a 3'-OH DNA strand. The free DNA strand then undergoes passage a 3' end. -beta and retinoic acid.

Med:10751406, PubMed:11279239, PubMed:12115244, PubMed:12748283, PubMed:1518710

H; CBR4 binds NADPD (PubMed:25203508).

diacetylated at 'Lys-14' and 'Lys-27' (H3K14ac and H3K27ac) (PubMed:29437725, PubMed:30867591). Functions as an amino acid exchanger (PubMed:11557028

and nucleosome remodeling.

(PubMed:17379599). Also acts on N-oleoyl ethanolamine phosphate/N-(9Z-octadecenoyl)-ethanolamin

(By similarity).

This complex regulates DNA replication processes under both normal and stress conditions, si

(PubMed:23082202).

and glutamylation of CGAS, leading to impair the nucleotidyltransferase activity of CGAS.

by effecting the fusion of recycling endosomes to basal bodies during cilia formation (By simila

activity of the myosin protein phosphatase 1 (PP1) complex. Acts by mediating phosphorylation and folding of newly synthesized PIKKs. Promotes assembly, stabilizes and maintains the activity

(PubMed:19112177, PubMed:19679664, PubMed:23455478, PubMed:27565346, PubMed:20385). In addition to histones, deacetylates other proteins: plays a central role in microtubule- and complete the histone octamer. It may play a role in heterochromatin maintenance in proliferati

consists of two similar hexanuclotide half-sites spaced by four nucleotides (By similarity). Plays an ir

has also weak lysophosphatidylethanolamine acyltransferase activity (LPEAT activity). Favors p and interleukin-3 (IL-3) receptors. Thus, through maintaining basal levels of cytokine receptors,

3'-linked polyubiquitin chains.

unit biogenesis independent on its methyltransferase activity, facilitating the incorporation of rit  
OG/clathrin complex is required for the maintenance of kinetochore fiber tension (PubMed:2129

ore attachments. May contribute to the regulation of separase activity. May regulate AURKA lo  
C regulatory network to orchestrate gene expression programs to control embryonic stem cell s

activity. Stabilizes the Pol-delta complex and plays a major role in Pol-delta stimulation by PC  
trioles adjoining each parental centriole during S phase. Phosphorylates 'Ser-151' of FBXW5 c  
ndrome. Alternate splicing results in multiple transcript variants. [provided by RefSeq, Feb 201

d:31767635, PubMed:31827282). Some complexes also catalyze acetylation of histone H4 at

ERN1/IRE1-mediated unfolded protein response (UPR) by mediating AMPylation or de-AMPy  
id may function in a chaperone-like manner, facilitating the efficient association of RNA proces:

sense RNA species and promoter-upstream transcripts (PROMPTs), and of mRNAs with proce

n. In the adult, Dkks are implicated in bone formation and bone disease, cancer and Alzheimer

J. Recruits TP53BP1 to DNA damage foci and, at least in particular repair processes, effective transmission of mechanical forces across the nuclear envelope and in nuclear movement and possibly play an essential role to ensure accurate mitotic chromosome condensation in neuron stem cells sense RNA species and promoter-upstream transcripts (PROMPTs), and of mRNAs with processia. Acts as a transcriptional corepressor via its interaction with the NFKB1 NF-kappa-B subunit.

971). Receptor for IL17C as part of a heterodimeric complex with IL17RE (PubMed:21993848) to the paracellular transport of small monovalent cations along a concentration gradient, due to senescence-associated cell cycle exit.

sponsiveness of the spindle assembly checkpoint. Also required for degradation of CDC20.

mitochondria to cytoplasm and its translocation to the nucleus; however, the involvement of caspase aggregation and guide them through the mitochondrial intermembrane space (By similarity).

nitrophenol and thyroid hormones, including 3,3'-diiodothyronine, triiodothyronine, reverse triiodothyronine (PubMed:25620095). May play a role as a regulator of cellular cholesterol homeostasis (PubMed:19580000).

omes is that the latter contain a 5S rRNA. Among different species, the proteins comprising the ribosome are conserved.

omes is that the latter contain a 5S rRNA. Among different species, the proteins comprising the ribosome are conserved.



embly intermediates in a process that promotes incorporation of early nuclear-encoded subuni

P-bound form to be efficiently methylated (PubMed:18539146, PubMed:20606008). Also acts :  
iding directionality for type II topoisomerase-mediated strand exchanges toward chromatid dec:  
: been found for this gene. [provided by RefSeq, Nov 2008]

ble-strand DNA. This complex stimulates both synaptic and presynaptic critical steps in RAD51

ough dephosphorylation of signaling molecules. Receptor for PIANP.

ty).

8). TPRKB acts as an allosteric effector that regulates the t(6)A activity of the complex. TPRKE  
nctional preinitiation complex with RNA polymerase II and the general transcription factors.

omes is that the latter contain a 5S rRNA. Among different species, the proteins comprising the

s SCO1, SCO2 and COA6 (PubMed:29381136). Probably facilitates MT-CO2/COX2 associatic

rization and cell adhesion. Plays a role in angiogenesis.

RNA); however interaction is probably mediated via its interaction with NCBP1/CBP80 compon

role in intraflagellar transport is mainly seen in tissues rich in ciliated cells such as kidney and testis. It is a non-self dsDNA that serves as template for transcription into dsRNA. The non-self RNA polymerase II transcribes this dsDNA into dsRNA.

apoptotic members of the Bcl-2 family leads to altered mitochondrial membrane permeability resulting in the release of cytochrome c.

with channel maturation through recruitment of NEDD4L to the Golgi apparatus and multivesicular bodies. It is a positive modulator of classical Wnt signaling, may play a crucial role in ciliary signaling during ciliogenesis.

is an ATP-dependent DNA translocase (PubMed:23973328, PubMed:28977671). Can promote Holliday junction resolution.

Under stress conditions, stabilizes replication forks and influences both CHEK1 phosphorylation and the inhibition of Cdc25A.

Its recruitment from the mitotic spindle poles may allow depolymerization of the microtubule end proximal to the kinetochore.

is involved in the recruitment of CENP-O complex (which comprises CENPO, CENPP, CENPQ and CENPU), CENP-E and CENP-F.

is involved in DNA replication (PubMed:11311434, PubMed:11311435). Participates in S phase and G2 phase checkpoint activation upon DNA damage.

is involved in centriole duplication. Required for CDK5RAP22, CEP152, WDR62 and CEP170 to prevent photoreceptor degeneration (By similarity).

is involved in the formation of the distal ends of centrioles (PubMed:15047868, PubMed:27219064, PubMed:27306797). It is involved in the formation of the distal ends of centrioles.

entrated, translocates from the endoplasmic reticulum to the plasma membrane where it probably associates with the elongating form of RNA polymerase II (RNA pol IIo) and facilitates its ubiquitination at UV damage.

is a component of the pre-replication complex (pre-RC). This may indicate a role for this protein as a sensor of DNA damage. It is also involved in the regulation of gene silencing in regulatory T-cells (Treg) via recruitment of corepressor CTBP1 (By similar mechanism to that of poly(ADP-ribose) polymerase-1 (PARP1) and poly(ADP-ribose) (PAR) in the presence of N-ethylmaleimide (PE). This step is required for the membrane association of ATG8-like proteins.

It is also involved in the regulation of gene silencing in regulatory T-cells (Treg) via recruitment of corepressor CTBP1 (By similar mechanism to that of poly(ADP-ribose) polymerase-1 (PARP1) and poly(ADP-ribose) (PAR) in the presence of N-ethylmaleimide (PE). This step is required for the membrane association of ATG8-like proteins.

It is also involved in the regulation of gene silencing in regulatory T-cells (Treg) via recruitment of corepressor CTBP1 (By similar mechanism to that of poly(ADP-ribose) polymerase-1 (PARP1) and poly(ADP-ribose) (PAR) in the presence of N-ethylmaleimide (PE). This step is required for the membrane association of ATG8-like proteins.

It is also involved in the regulation of gene silencing in regulatory T-cells (Treg) via recruitment of corepressor CTBP1 (By similar mechanism to that of poly(ADP-ribose) polymerase-1 (PARP1) and poly(ADP-ribose) (PAR) in the presence of N-ethylmaleimide (PE). This step is required for the membrane association of ATG8-like proteins.

ynthesis of unsaturated C16 long chain fatty acids and, to a lesser extent, C18:0 and those with  
ogenous and exogenous alpha-dicarbonyl compounds and xenobiotic alicyclic ketones.

pendent manner to a region near the 5' end of the mRNA where it functions in mRNA export to  
idently of the MLL2/MLL3 complex (PubMed:19124460). However, its function in DNA damage

the mitotic kinetochores. A scaffold protein responsible for the initial recruitment and maintenar  
atin at pericentric and telomere regions. H3 'Lys-9' trimethylation is also required to direct DNA

all nuclear RNA to form the core snRNP. In the cytosol, the Sm proteins SNRPD1, SNRPD2, S  
all nuclear RNA to form the core snRNP. In the cytosol, the Sm proteins SNRPD1, SNRPD2, S

24065767). May also promote acetylation of nucleosomal histone H4 by KAT5 (PubMed:15502

e (PubMed:24463511). Inhibits activity of protein phosphatase 2A (PP2A). Does not inhibit pro

ivity towards bile acids or steroid sulfates (including taurocholate, cholate, chenodeoxycholate,

). May play a role in chromosome segregation through establishment of sister chromatid cohes  
hydrate structure present in alpha-dystroglycan (DAG1), which is required for binding laminin G

PubMed:25931565). Promotes the recruitment of SLF2 and the SMC5-SMC6 complex to DNA

cytochrome b translation and/or stability.

acted during DNA repair and recombination. Has endonuclease activity towards branched DNA processing and modification, leading to remodel the translational program of differentiating cells

centriolar proteins, such as POC1B, POC5 and CEP135, into the distal portion of centrioles (Pt

102793, PubMed:31693891). Aryl sulfonamide anticancer drugs change the substrate specificity of the preinitiation complex with RNA polymerase II and the general transcription factors.

signaling events in the cytoplasm (By similarity).

PubMed:30456879, PubMed:29131025).

nic reticulum has failed. May therefore function in the endoplasmic reticulum stress-induced pr

ibules and may allow the NDC80 complex to track depolymerizing microtubules (PubMed:2308

tion. Due to its presence at higher levels in tumor endothelium than in normal tissue endothelium, it is thought to be novel, with no obvious relationship to other transposases, or other known protein families.

centriole amplification (PubMed:22020124).

cytoplasmic localization in exocrine cells and for mitochondrial calcium ion transport. May function as a

transducer of signals from the nucleus to the cytoplasm. It is found in transverse actin (TAN) lines which are bound to F-actin cables and couple the nucleus to retrograde transport. Its function probably occurs via HDAC1 down-regulation, keeping GLI1 acetylated and inactive. Inhibits

the complex is a direct component of the kinetochore-microtubule interface and directly associates with microtubules. It facilitates the processive movement of microspheres along a microtubule in a depolymerization-

inhibitory). Acts as a regulator of metabolism and hepatic lipid accumulation (By similarity). Under

the cell surface. Regulates the ability of LPAR2 to activate ERK and RhoA pathways. Regulates the JNK pathway. It also interacts with actin-modifying proteins such as DAAM1 (By similarity). In cooperation with integrins, it mediates the signaling of glycosylated structures expressed on cell surfaces or secreted in biological fluids are believed to

be located at the same site in the gene, placing the splice sites an invariant distance from the constant structure.

It is present in the G2/M phase but does not disassemble fully formed ciliary axonemes. As cilium assembly and disassembly

1614, PubMed:26682650). Cleaves HJs by a nick and counter-nick mechanism involving dual trafficking of endosomal alpha5beta1 integrin to the plasma membrane and involved in invasive c

bly via its function as regulator of autophagy.

onuclease III enzyme to produce an approximately 70-nt stem-loop precursor miRNA (pre-miR)



RNase III enzyme to produce an approximately 70-nt stem-loop precursor miRNA (pre-miRNA) in a Dicer-independent mechanism. At the nucleoplasmic side of the NPC, Ran binds to importin-beta and

PubMed:23387299, PubMed:23453970, PubMed:23576762, PubMed:23665031). The BCR(KLHL3) has kinase activity. Also involved in the regulation of growth-related processes in adipocytes and myotubes.

May serve as nuclear receptor.

involved in the regulation of inflammatory signaling pathways. In cooperation with TAX1BP1 promotes disassembly of the IL9R, IL15R and IL21R. Following ligand binding to cell surface receptors, phosphorylates specific

kinase binding sites in the outer plate of the kinetochore (PubMed:15548592). The NDC80 complex is involved in chromosome positioning and bipolar spindle stabilization (By similarity).

involved in (By similarity).

phosphorylation (PubMed:18663142, PubMed:19208764). TPX2 is inactivated upon binding to

involved in (PubMed:31978345). Acts as a regulator of innate immunity in macrophages by modulating the expression of HIV-1 gene expression. Isoform 2 and isoform 3 also bind to the IPCS (IRF1 and p53 complex).

involved in nucleosome remodeling.

involved in (PubMed:1431929). Regulates cell growth through regulation of cell cycle progression and cytokinesis (Pip2). Key role in DNA damage response (DDR) by being conveniently positioned at the replication fork.

RNase III enzyme to produce an approximately 70-nt stem-loop precursor miRNA (pre-miRNA)

localization of this complex; directs CPC movement to different locations from the inner centromere

ed:24262037). Negatively regulates apoptosis, possibly by modulating the activity of caspase-9

9). Likewise, the TRIAP1:PRELID3A complex mediates the transfer of phosphatidic acid (PA) to ADP or NADH to form squalene. It is the first committed enzyme of the sterol biosynthesis pathway. Secretion in the extracellular milieu. Activation of NLRP1 inflammasome is also required for HM

1 complex, in association with SNARE proteins, is also proposed to be involved in neurite exten

tion. Mitochondria, promotes translocation of BAX to mitochondria and cytochrome c release from mitochondria. It is an oncogene for promoting bladder cancer cells proliferation, apoptosis inhibition and carcinogenesis. It represents a distinct pathway or if it can be integrated in the canonical pathway, as PKC seem

to activate RNase III enzyme to produce an approximately 70-nt stem-loop precursor miRNA (pre-miR)

is associated to the cytoskeleton by binding PLEC which can associate with the intermediate filament system. Mechanistically, uses molecular oxygen inserting one oxygen atom into a substrate, and reduces its own iron turnover.

High affinity for GCK, while GCKR with bound fructose 1-phosphate has strongly decreased affinity for

quired for the initiation of the B-cell response, but also for its down-regulation and termination.  
G proteins. Signaling inhibits adenylyl cyclase activity and decreases cellular cAMP levels (Pu

ocampal neurons in a tubulin and actin-dependent manner. In the developing telencephalon, c

and thereby modulating cell cycle progression and cell survival (PubMed:19647222, PubMed:200000000). May positively regulate the transcription by NFE2L2 of genes involved in the response to oxidation by endothelial cells as well as angiogenesis (PubMed:15467828, PubMed:16488400, PubMed:16488400). Plays a role in the regulation of skeletal structure through its F-actin-bundling activity. Involved in the regulation of cell adhesion and cell migration. Phosphorylates the 5'-terminus of the tRNA 3'-exon during tRNA splicing; this phosphorylation event is a prerequisite for the activity of MAPK1/3 (ERK1/2), through SOCS6. Involved also in the control of energy metabolism and in the regulation of learning and memory deficits (By similarity).

(PubMed:9174363). May play a role in classical or alternative activation of macrophages via inhibition of the transcription factor IRF3 (By similarity). In macrophages and dendritic cells, specifically involved in TLR3- and TLR4-induced signaling.

This stress-inducible metabolic regulator also plays a role in protection against oxidative and genotoxic stress.

miR-143-3p (miR-143-3p), which is further cleaved by the cytoplasmic Dicer ribonuclease to generate the mature miR-143-3p.

miR-143-3p is expressed in somatic tissues. [provided by RefSeq, Aug 2019]

miR-143-3p is involved in the regulation of protein re-folding of misfolded proteins and controlling the targeting of proteins for subsequent degradation. miR-143-3p, which is further cleaved by the cytoplasmic Dicer ribonuclease to generate the mature miR-143-3p.

l:19332548, PubMed:20129063, PubMed:23478441, PubMed:23478445, PubMed:23677613, |

re-folding of misfolded proteins and controlling the targeting of proteins for subsequent degradation in which global protein synthesis is inhibited (By similarity). Required for cell cycle progression.

This gene also produces a ARHGAP11A-SCG5 readthrough transcript and ARHGAP11A-SC

development of the inner ear. Phosphorylates PLCG1, CBL and FRS2. Ligand binding leads to repair pathway. Required for proper resolution of DNA double-strand breaks (DSBs) by HR. Is involved in regulation of polymerase delta by competing with POLD3 for PCNA binding (PubMed:11595739). Plays an important role in cell cycle regulation and/or stoichiometry.

miR-145-3p (miR-145-3p), which is further cleaved by the cytoplasmic Dicer ribonuclease to generate the mature miR-145-3p.

preapical plasma membrane subdomain to set up initial epithelial polarization and the apical lumen.

PubMed:28302677). Mediates phosphorylation of ERK1/2 and thereby promotes retinal lens f  
enhanced by the katanin complex (PubMed:28436967). May have a preferential role in regula

lherens protein PLEKHA7 (PubMed:30463011).

ssor (PubMed:11782474). Binds to the consensus binding site 5'-[G/C][A/T]AAA[T/C]AA[A/C]-3'

ture and the way DNA is wrapped around the nucleosome and gives rise to protruding DNA en  
netochores and spindle microtubules (PubMed:7889940, PubMed:23891108, PubMed:253955  
r permissive role in the normal embryonic cardiomyocyte cell cycle and in promoting continued

oetes with histone H3 for the same binding site on the histone demethylase complex formed by

(PubMed:10806483). Required for postnatal development, possibly by regulating the homeost

NA), which is further cleaved by the cytoplasmic Dicer ribonuclease to generate the mature miR

pathway. May act by recruiting the corepressors CTBP1 and HDAC3. May be involved in neur

e G2 checkpoint and progression to cytokinesis during mitosis. Plays a key role in response to  
t is functionally redundant with SOX17. Interaction with MEF2C enhances transcriptional activa  
ne SKA1 complex for microtubules and may allow the NDC80 complex to track depolymerizing  
NA), which is further cleaved by the cytoplasmic Dicer ribonuclease to generate the mature miR

LUG-dependent repression of E-cadherin transcription. Acts as a hypoxic regulator by bridging  
- (GG-NER) by acting as damage sensing and DNA-binding factor component of the XPC com  
diabetes. Interaction with S100A12 on endothelium, mononuclear phagocytes, and lymphocyte  
in-2-induced activation of integrin beta-1 (ITGB1) in cardiac fibroblasts. Phosphorylates MARCK

t on intracellular ceramide levels, enhances cell growth and inhibits apoptosis (PubMed:161182

brane space and subsequent apoptosis (PubMed:18350175).

ubiquitin ligase complex components ELOC and CUL5 (PubMed:21199876).

lay an important role in the development and maturation of many tissues (PubMed:12213388).  
plasmic scaffolding proteins.

Akt triggers apoptosis and decreases cell proliferation. Also controls the phosphorylation of AKT  
and milk production in the mammary gland and inducing differentiation of mammary tumor cells

d by ultraviolet light (By similarity).

ulates its interaction with the NCOR1/HDAC3 corepressor complex, enhancing transcriptional r

CTL/D superfamily members on chromosome 12p13 in the natural killer gene complex region. [E3  
ubiquitin ligase complex components ELOC and CUL5 (PubMed:21199876).

has been shown to be involved in several aspects of telomere replication. The CST complex in

with suppression.

immune system activator SKAP2 (PubMed:21719704). Positively regulates toll-like receptor (TLR)-

remodeling by phosphorylating the Ras activator RASGRF1 and the Rap inhibitor SIPA1L1 leading to  
leolytic degradation, or deadenylation-dependent mRNA decapping and subsequent 5'-3' exonuclease  
wardly than (pyroglutamate)apelin-13 from APLNR (By similarity). Hormone involved in the regulation of

128, PubMed:20347429). In complex with CENPX and FANCM (but not other FANCD1 proteins), important in  
embryonic stem cells, has weak methyltransferase activity and plays a less critical role in forming



binds to promoter regions (PubMed:7969177, PubMed:24382891, PubMed:28500257). Regul:

ation and autophagy.

receptor required for apoptosis induction when not associated with netrin ligand (PubMed:1259

ven transcriptional activation. |[Isoform 4]: Attenuates the ability of transcription factor HIF1A a

ssivity of telomerase by displacing active telomerase from DNA ends. Releases telomerase by

this gene. [provided by RefSeq, May 2011]

sor complex (PubMed:20159957). Binds to the sequence element 5'-AACGACCGACCTTGAG-

ation. Component of the TRIM28/KAP1-MDM2-p53/TP53 complex involved in stabilizing p53.

3. Expression of this gene may be regulated by the cytokine TNF-alpha. [provided by RefSeq, M  
ebellar granule neurons, phosphorylated and sumoylated MEF2A represses transcription of NL  
pathway and acts as a scavenger receptor for SDF-1. Binds to the allosteric site (site 2) of inte

radative activity of the exosome on several of its nuclear RNA substrates. Doesn't need a cofac  
ID), and is thus unlikely to produce a protein product. [provided by RefSeq, Feb 2017]

ocytes from the splenic reservoir to sites of inflammation (By similarity).

nt, distribution, and electrical activity in the neocortex. Necessary for proper development of me  
dbMed:26496226). Involved in the regulation of cell proliferation and resistance to thermal stres

alpha-B signaling. The target proteins for its E3 ubiquitin-protein ligase activity include: RIPK1, RIP

NA), which is further cleaved by the cytoplasmic Dicer ribonuclease to generate the mature miF  
d: Lys-6-linked may be involved in DNA repair; Lys-11-linked is involved in ERAD (endoplasmic

are likely to contribute differentially to the complex helicase activity.

ox domains. Phosphorylates BORA, BUB1B/BUBR1, CCNB1, CDC25C, CEP55, ECT2, ERCC  
dzone spindle assembly and cleavage furrow formation. Key component of the cytokinesis che  
ctivity suppressed by insulin (PubMed:10358076). Main regulator of redox balance and osteobl

ional activator activity of the CLOCK-ARNTL/BMAL1 heterodimer. Restricts the CLOCK and AF  
in kidney development and may be involved in podocyte differentiation (By similarity). During e

ional activator activity of the CLOCK-ARNTL/BMAL1 heterodimer (By similarity).

es endothelial cell survival during vascular development. Serves as a microtubule-dependent si  
1 and CDKN1B/p27. Normally, CDKN1B/p27 turnover is regulated by COPS5, which binds CD

ugh the inhibition of KDM8 (PubMed:28455245).

ind activation of RAS, RAF1 and the MAP kinases MAPK1/ERK2 and/or MAPK3/ERK1. KITLG

ermutation (SHM) and class switch recombination (CSR) of immunoglobulin genes. Essential fc

thereby affects neural activity. May also play a role in regulating the release of other neurotran

NA), which is further cleaved by the cytoplasmic Dicer ribonuclease to generate the mature miF  
;TP53-independent intracellular reactive oxygen species (ROS) regulatory function and a p53/

ent manner (By similarity). Controls macrophage, eosinophil and neutrophil differentiation via th interaction with PPP2R1A. Its phosphorylated form is necessary for chromosome congression

chromosomes and enabling independent chromosome motility (PubMed:27362226). Binds DN,

chore oscillations and dynamics of microtubule plus-ends during live cell mitosis, possibly by f

contributing to the accumulation of EGFR at the limiting membrane of early endosomes. Down

otif-containing reporter construct nor in inhibitory activity on the isoform 1 transcriptional repres: complex that recognizes UV-induced DNA damage and recruit proteins of the nucleotide excisio

y the down-modulation of the RXR alpha activities.

extracellular matrix production, immunosuppression and carcinogenesis. The formation of the

thylates H3K9me2 in absence of H3K4me3. Has activity toward H4K20Me1 only when nucleos

emethylation and transcriptional activation. Involved in spermatogenesis by regulating expressi subunit of phosphatidylinositol 3-kinase. Activated KIT also transmits signals via GRB2 and act

15322075, PubMed:15775988). Plays a dual role both as an inhibitor of CCAAT/enhancer-bin

1, KCNQ2/Kv7.2, KCNQ3/Kv7.3 or CLC5 (PubMed:26363003, PubMed:27445338). Promotes

hich is required for proper activation of the transcription factor (PubMed:28609714). Both inhibi

removed base with both 3'- and 5'-phosphates. Has DNA glycosylase/lyase activity towards mis

se to mitogenic or stress stimuli such as UV-C irradiation, epidermal growth factor (EGF) and a  
11A, is located only 16 kb from this gene on human chromosome 11q12.1. [provided by RefSe

NA), which is further cleaved by the cytoplasmic Dicer ribonuclease to generate the mature miR  
/ recognizes and binds histone H3 trimethylated at 'Lys-9' (H3K9me3) and unmethylated at 'Arg

and relaxation of vascular smooth muscle (By similarity). Binds EIF2B5 and blocks its activity,  
ling multiprotein complexes. May also play a role in the organization of chromosomes in the nu

NA), which is further cleaved by the cytoplasmic Dicer ribonuclease to generate the mature miR

ry pathway is exploited by tumors to attenuate anti-tumor immunity and escape destruction by  
gulate transcription. Through interaction with SMAD2 and SMAD3, LDLRAD4 may compete wit  
NA), which is further cleaved by the cytoplasmic Dicer ribonuclease to generate the mature miR

l:12554770). The RXRA/RARB heterodimer can act as a repressor on the DR1 element and as  
junctions in p53/TP53-dependent mitotic spindle checkpoint. Regulates microtubule dynamics a

3-4 and C-18. Has no activity toward 9-cis and 13-cis retinoic acid stereoisomers (PubMed:220

t by internal magnesium. Can be blocked by extracellular barium or cesium.

ays a role in immune response, of T cells, natural killer (NK) and neutrophils (PubMed:184247;

1 are essential for the homology search and strand exchange (PubMed:26681308). Part of a P,

se and GTP hydrolysis are modulated by numerous regulatory proteins (PubMed:8774883, Pu

NA), which is further cleaved by the cytoplasmic Dicer ribonuclease to generate the mature miR

differentiation of epithelial cells and may also function in skeletal and kidney development. Cor  
ells, enhances key inflammatory mediators and inflammatory response through the modulation

lar stress response and is in turn repressed by p53/TP53 presenting a SIRT1 isoform-depende

PubMed:24623306).

rain of TGF-beta (PubMed:22278742). Controls activation of TGF-beta-1 (TGFB1) on the surfa

NA), which is further cleaved by the cytoplasmic Dicer ribonuclease to generate the mature miRNAs (NETs) (By similarity). NETs are mainly composed of DNA fibers and are released by neutrophils. The H2A 'Lys-119' on the X chromosome and is required for normal silencing of one copy of the X chromosome.

Essential for the maintenance of the epithelial stem-cell compartment of the small intestine. ERCC6L translocase and ATPase activities (PubMed:28977671).

Regulates the localization of CENPE. Negatively regulates PLK1 activity in interphase cells and suppresses centrosome duplication thereby affects sister chromatid cohesion. Acts as a substrate for anaphase-promoting complex.

Essential for the localization of cohesin, thus leading to cohesin dephosphorylation (By similarity). Essential for recruiting KIF2C to kinetochores.

Involved in the activation of BAG1 gene expression by modulating dimethylation of promoter.

The function implies inhibition of methylation on histone H3 'Lys-4' (H3K4me3) and 'Lys-36' (H3K9me3).

(PubMed:10192396).

Essential for neuronal fate specification. Represses transcription by the cardiac transcriptional activators GATA4 and GATA5.



PubMed:19890979).

o-M transition, after the nuclear-envelope breakdown: acts by mediating phosphorylation of mu  
ad for adipogenesis: regulates triglyceride metabolism in adipocytes by regulating expression o

sponses through the activation of specific target genes and can act as a transcriptional activatc

kappa-B activation through repression of EP300-dependent RELA acetylation.

age and homologous recombination.

from the constant structural features of the tRNA body. Isoform 1 probably carries the active s

cells (PubMed:12917409, PubMed:14570867, PubMed:14592415). May also mediate cholestc

at mitochondrial surface (By similarity). Although it cannot be excluded that it can act as a phos

ifferentiation of tissues involved in metabolic control. May play a regulatory role during G0/G1 tra

3 kinase, nuclear accumulation of beta-catenin and activation of Wnt target genes (PubMed:1

s not yet clear if it represents a distinct pathway or if it can be integrated in the canonical pathw

NA), which is further cleaved by the cytoplasmic Dicer ribonuclease to generate the mature miF

PubMed:31672913). Upon amino acid restimulation, disassembly of the LFC complex liberates the

CTC to the inner centromere, and the microtubule binding activity within the central SAH domain controls the expression of YAP1 and WWTR1/TAZ, thereby regulating cell proliferation, migration and epithelial

cell morphogenesis of the lens vesicle. Together with the CITED2 coactivator, stimulates the PIT1

expression of hematopoietic precursor cells to the bone marrow stroma. Isoform 2 or the nuclear form is probably involved

in cardiac activating regions (By similarity).

At least two variants are described. Additional splicing is suggested but complete sequence for further

studies. May play a role in the maintenance of naive T-lymphocytes in the spleen.

Phosphorylation of STAT3.

and repress transcription. Recognizes and binds p53/TP53 monomethylated at 'Lys-382', leading to repression of KLF1. May be involved in regulation of some genes in gonads. May also be involved in hydrolysis of triphosphate (m7GpppG). Also hydrolysis m7G- and m227G U3-capped RNAs but with less efficiency.

In vivo, appears to be the primary enzyme involved in removing Sp and Gh from ssDNA in nucleosomes.

Also plays an important role in the biosynthesis of complex lipids (PubMed:8626589). Displays cytoplasmic localization of NUMA1 and DCTN1 to the cell cortex during metaphase (PubMed:27335426). Functions in the regulation of

cytoplasmic localization of NUMA1 and DCTN1 to the cell cortex during metaphase (PubMed:27335426). Functions in the regulation of postmitotic positioning of centrosomes and T cell development (By similarity). Involved in the regulation of postmitotic positioning of centrosomes

stream MMR events, including strand discrimination, excision, and resynthesis. ATP binding and hydrolysis by the peroxidase activity reduces PGG2 to the hydroxy endoperoxide PGH2, the precursor of all 2

acts as an inhibitor of homology-recombination repair (HR) pathway by limiting RAD51 accumulation

ocalized within the parabrachial nucleus and central amygdala, which constitutes part of the limbic system (PubMed:102776429). May also contribute to the regulation of gene expression in the nucleus (PubMed:102776429).

miR-145 (miR-145), which is further cleaved by the cytoplasmic Dicer ribonuclease to generate the mature miR-145, acts as a coactivator of B-cell-specific transcription. Plays a role in spermiogenesis and oogenesis (PubMed:102776429).

Promotes cell differentiation by regulating MAPK1/MAPK3 activity and regulating the expression of genes involved in inflammatory and innate immune responses. In macrophages, enhances Fc-gamma receptor-mediated phagocytosis (PubMed:102776429).

miR-145 (miR-145), which is further cleaved by the cytoplasmic Dicer ribonuclease to generate the mature miR-145, acts as a coactivator of B-cell-specific transcription. Plays a key role in polyploidization of cells in placenta and oogenesis (PubMed:102776429).

miR-145 (miR-145), which is further cleaved by the cytoplasmic Dicer ribonuclease to generate the mature miR-145, acts as a coactivator of B-cell-specific transcription. Plays a key role in polyploidization of cells in placenta and oogenesis (PubMed:102776429).

miR-145 (miR-145), which is further cleaved by the cytoplasmic Dicer ribonuclease to generate the mature miR-145, acts as a coactivator of B-cell-specific transcription. Plays a key role in polyploidization of cells in placenta and oogenesis (PubMed:102776429).

miR-145 (miR-145), which is further cleaved by the cytoplasmic Dicer ribonuclease to generate the mature miR-145, acts as a coactivator of B-cell-specific transcription. Plays a key role in polyploidization of cells in placenta and oogenesis (PubMed:102776429).

miR-145 (miR-145), which is further cleaved by the cytoplasmic Dicer ribonuclease to generate the mature miR-145, acts as a coactivator of B-cell-specific transcription. Plays a key role in polyploidization of cells in placenta and oogenesis (PubMed:102776429).

), and thereby regulates their activity (By similarity).

lopodial dynamics and enhancing axon elongation. Its binding to kinesin heavy chains (KHC), found in leukemic cells is involved in leukemogenesis and contributes to hematopoietic stem/

nt and differentiation of IL17A expressing gamma-delta T-cells (By similarity). Regulates expres

SNRPE, SNRPF and SNRPG are trapped in an inactive 6S pICln-Sm complex by the chaperon

ge inflammatory response. Acts as a receptor for heme which stimulates its interaction with the quired for efficient homologous recombination-dependent repair of double-strand breaks (DSBs

integrity (By similarity).

ating centrosomal proteins such as CROCC, CEP250 and NINL, resulting in their displacement

exes must first cluster into clathrin-coated pits.

on and direct binding of a specific DNA sequence in their promoter regions. Involved in early ei

VA), which is further cleaved by the cytoplasmic Dicer ribonuclease to generate the mature miF

and SHPTP2 to the tyrosine phosphorylated form. Required for correct adhesion and migrator

and binding of spermatozoa to zona pellucida.

nite segmentation and patterning (By similarity).

tor endocytosis.

t induce detectable inactivation of KCNMA1. Two or more subunits of KCNMB3 are required to

sue and activate their prothermogenic actions. Stimulates an eosinophil-dependent increase in

kruppel-like factors KLF4 and KLF2 (By similarity). Controls cell senescence in a p53-dependent  
01839, PubMed:29018201). In response to oxidative stress, electrophile metabolites inhibit act

C1 and CIITA-dependent transcriptional activity (PubMed:15940264, PubMed:15941832, PubM

al, proliferation and cell death. Activates expression of p53/TP53 and TGFB1, and thereby help

NA). The CTF18-RFC complex catalyzes the ATP-dependent loading of PCNA onto primed an

rotein synthesis-dependent forms of long-term potentiation (LTP) and depression (LTD) and fo

-induced RAC1 GTPase activation and vascular endothelial cell migration and assembly. Exer

nduced degradation of NEUROD2 induces presynaptic differentiation.

P8, CDC7, CDC20, CDC25A, CDC25C, CC2D1A, CENPA, CSNK2 proteins/CKII, FZR1/CDH1

n of a variety of glycerolipid and sphingolipid phosphate esters including phosphatidate/PA, lys  
play a negative role in adipogenesis through the regulation of lipolytic and antilipogenic gene e  
ubiquitination in response to DNA damage.

to the regulation of T-cell responses. Promotes osteoclastic bone resorption; this requires both  
landins (PubMed:21049984).

membrane and binds to RAB3IP/Rabin8, the guanosyl exchange factor (GEF) for Rab8 and the  
:22354992). May act as a molecular switch between endosomal and autophagosomal transport

P-ribosylation of ubiquitin which prevents ubiquitin conjugation to substrates such as histones (H4). Histone deacetylation gives a tag for epigenetic repression and plays an important role in  
chaperone function (PubMed:11274138, PubMed:15577939, PubMed:15937123, PubMed:27

Involved in the unidirectional retrograde dendritic transport of endocytosed BACE1 and in efficacy  
(By similarity).

intrastrand d(GpG)-cisplatin cross-link, inserts dCTP opposite the 3' guanine (PubMed:2444990)

TRAF2-TRAF3 E3 ligase pathway to promote immune cell survival and differentiation (PubMed:10800000)



ession seems to be a mechanism for evolving species-specific changes in skeletal structures.  $\epsilon$  mediated signal transduction but instead induces beta-arrestin recruitment, leading to ligand inte

y of cerebral cortex activity during wakefulness and sleep.

ssion of MCM10 which plays an important role in DNA-replication (PubMed:24726359). Acts as

to use 1-monoalkylglycerol (1-MAkG) as an acyl acceptor for the synthesis of monoalkyl-mono

relial barriers (PubMed:26795251, PubMed:24695216, PubMed:20581831). Signature pyrimidi  
ene transcription by transactivating GNRH1 promoter and repressing PENK promoter (By simil  
gamma, dissociates the protein from the aminoacyl-tRNA synthetase multienzyme complex and  
r. Shows substrate preference of CDP > UDP > ADP > GDP > TDP.

proviral genome, along with a deamination-independent mechanism that works prior to the prc

ption in response to nutrient deprivation seems to involve CTBP1. In cooperation with MTA1 (ir

which phosphorylate interferon regulatory factors: IRF3 and IRF7 which in turn activate transcrip

ubiquitination, decreasing the activating 'Lys-63'-linked ubiquitination and leaving unchanged th

carriers, others mediate the permeability to ions and small molecules. Often, several claudin fam

complexes, and may also be involved in signaling pathways in T-cells and neural cells. Differenti

ly involved in the regulation of reactive oxygen species homeostasis. May be a prominent sourc

PubMed:23903368).

also stimulate the activity of DNA ligases and/or restrict the nuclease activity of MRE11 to prevent

wound healing. Signaling is modulated by the formation of heterodimers with PDGFRB (By similar

organization; negatively regulates focal adhesion (FA) assembly promoting malignant glial cell m

pendent and -independent mechanisms (PubMed:28469175, PubMed:31006531). Upon activation of CCAR2 to the cytoplasm, thereby impairing its ability to inhibit SIRT1 which is involved in the

PubMed:23027953, PubMed:23910378, PubMed:23747010, PubMed:30842659). Innate immun

1. Regulates the stability of growth factor receptors, including PDGFRB (Probable).

and may function as a water and urea exit mechanism in antidiuresis in collecting duct cells. It

; adapters (CLASPs, clathrin-associated sorting proteins) and recruiting the GPRCs to the adap

key role in the development of the visual pathway. Regulates the formation in ipsilateral retina

ponse to IFNG stimulation (PubMed:27796300). However, the role of ADP-ribosylation in the pr  
s by sequestering the target RNAs. Seems to regulate expression and localization of ITGA3 by  
lls (TH17). It drives rapid clonal expansion of naive but not memory CD4 T-cells. It also strongly  
al mRNA to initiate its degradation from the 5'-end. Its target viruses belong to families which ir

Mechanistically, recruits TBK1 at the Golgi apparatus, promoting its trans-phosphorylation after

ontrol of glycolysis and is important for tumor cell proliferation and survival (PubMed:17308100, F

ice nicks at hydroxyuracil and other types of pyrimidine base damage (PubMed:17353262, Put

l, CYTH2, CYTH3 and CYTH4 to the plasma membrane in the GDP-bound form. Regulates the  
: neurogenesis: acts by inhibiting Notch cleavage by furin, maintaining Notch in an immature in

tely required. Participates in biosynthesis of heparan sulfate that can ultimately serve as L-sele  
inding laminin G-like domain-containing extracellular proteins with high affinity (PubMed:25279  
MP2 (PubMed:12714657). Cleaves ADGRB1 to release vasculostatin-40 which inhibits angioge

tor (BCR) signaling. Mediates B-cell proliferation response to anti-IgM, anti-CD40 and IL4 stimu

e response is still unclear but it may function as a licensing signal for additional histone H4 pos

nucleus. Plays an important role in regulation of the kinase activity of AURKA for mitotic commi

oAs (PubMed:10744784, PubMed:12923223).

sis (PubMed:23084991). In concert with RAB32, regulates the proper trafficking of melanogen

endothelial migration, ICAM1 engagement promotes the assembly of endothelial apical cups thro

repair pathway (the NER pathway) to initiate DNA repair (PubMed:15448697, PubMed:16260

sts with GRB2 or PLCG2 and induces phosphorylation of MAPK1, MAPK2, FAK/PTK2 or RAC1  
S.

including cell survival, cell proliferation, migration and differentiation. Ligand binding at the cell  
different kappa-B sites that they can bind with distinguishable affinity and specificity. Different c

l-terminal glycine degrons are conditionally exposed after a failure of N-myristoylation (PubMed

ed in conditioned medium of first trimester trophoblast. Kp-10, but not other kisspeptins, increa

ibMed:23776175). Is involved in the regulation of skin pigmentation through the control of mela

egrin beta-1; this function seems to redundant with the AP-2 complex and seems to require DA

n also phosphorylate 1-alkyl-2-acylglycerol in vitro as efficiently as diacylglycerol provided it coi  
sitioning. May be involved in nucleus-centrosome attachment and nuclear migration in neural p  
both muscle, the tuning of hair cells in the cochlea, regulation of transmitter release, and innate  
F6, leading to NF-kappa-B activation, cytokine secretion and the inflammatory response.

→ from the blood serum and in lipid metabolism (PubMed:19270337, PubMed:21398697, PubM

radation of cellular as well as viral RNA, resulting in the inhibition of protein synthesis, thus term  
ctivation mediated by estrogen receptors. Acts also as a transcriptional corepressor; interferes  
is viral RNA, resulting in the inhibition of protein synthesis, thus terminating viral replication. Ca

ransactivation (By similarity). Plays a pivotal role in the transactivation of NF-kappa-B, SRF and

cells. Can replace beta-catenin in E-cadherin/catenin adhesion complexes which are proposed

membrane and binds to RAB3IP/Rabin8, the guanosyl exchange factor (GEF) for Rab8 and the

exes which contain ACTL6A/BAF53A and PHF10/BAF45A, are exchanged for homologous alte

cuole-like structures (named MIV), which engulf and degrade unhealthy mitochondria by accun  
major integrators of various mitogenenic and antimitogenic signals. Also substrate for SMAD3,

tein, which may regulate hemostatic balance and function as a tumor suppressor. Mutations in  
nd is required for lysine succinylation of histones: associates with KAT2A on chromatin and prc  
gulator of the ATF4-dependent transcription during the ISR: while TRIB3 expression is promot  
te inflammation impairing NLRP1-inflammasome activation, hence CASP1 activation and IL1B

endosomes and lysosomes. Has a critical role in neurodevelopment (PubMed:31079899).

→ed activation of CEBPB. Involved in the prevention of autoimmunity; this function implicates bi

and organization of newly synthesized extracellular matrix.

in hippocampal neurons, it recruits ADAM10 to the plasma membrane (PubMed:23676497).

Regulation of SPATA18/MIEAP, BNIP3 and BNIP3L/NIX at the mitochondrial outer membrane regulates the functional antimicrobial barrier of the colonic epithelium, and to the bactericidal activity of macrophages. It is involved in the regulation of iron metabolism, mediated by the formation of mitochondrial [2Fe-2S] proteins, the synthesis of [4Fe-4S] clusters and iron-sulfur cluster assembly.

It acts as a negative regulator of B-cell antigen receptor signaling. Mediates signaling from the FC-γ2b receptor to the FasL-dependent apoptosis. Therefore, activation of RNASEL could lead to elimination of virus infected cells. It promotes cancer cell migration, invasion and tumor growth (PubMed:20079333).

It regulates the functional antimicrobial barrier of the colonic epithelium, and to the bactericidal activity of macrophages. It is involved in the regulation of iron metabolism, mediated by the formation of mitochondrial [2Fe-2S] proteins, the synthesis of [4Fe-4S] clusters and iron-sulfur cluster assembly. It is involved in the regulation of iron metabolism, mediated by the formation of mitochondrial [2Fe-2S] proteins, the synthesis of [4Fe-4S] clusters and iron-sulfur cluster assembly. It is involved in the regulation of iron metabolism, mediated by the formation of mitochondrial [2Fe-2S] proteins, the synthesis of [4Fe-4S] clusters and iron-sulfur cluster assembly.

It is involved in the regulation of iron metabolism, mediated by the formation of mitochondrial [2Fe-2S] proteins, the synthesis of [4Fe-4S] clusters and iron-sulfur cluster assembly. It is involved in the regulation of iron metabolism, mediated by the formation of mitochondrial [2Fe-2S] proteins, the synthesis of [4Fe-4S] clusters and iron-sulfur cluster assembly.

It appears to be involved in three stages: inflammation, proliferation and remodeling. Plays an

ains attached to glycoproteins. Participates in biosynthesis of selectin ligands. Selectin ligands

ed. Therefore, the proteasome participates in numerous cellular processes, including cell cycle

aveolae by constraining caveolae at the cell membrane (PubMed:25588833).

drugs across the brush border membranes.

wound healing probably by modulating both growth and migration of primary keratinocytes and  
action that is necessary for physiological and asthmatic airway resistance. Necessary for gastro

MP metabolism, kinase-dependent intracellular signaling, neuronal calcium signaling as well as

E2V1-UBE2N (also known as UBC13-UEV1A complex) generates 'Lys-63'-linked polyubiquitin



d CRY1/2 (PubMed:15193144). Represses the activity of the circadian transcriptional activator  
atellite cell proliferation (PubMed:10080180, PubMed:22431096, PubMed:10814726, PubMed  
rtified on chromosome 2. [provided by RefSeq, Sep 2011]  
n integrity of epithelial barrier (By similarity). Ligand for integrin alpha-L/beta-2 involved in mem  
ontrol centrosomal microtubule organization (PubMed:20719959).  
major integrators of various mitogenic and antimitogenic signals. Also substrate for SMAD3,

or of a pair of coregulated exons: promotes inclusion of the smooth muscle (SM) exon but exc  
, PubMed:26758068). Involved in splice site selection of vascular endothelial growth factor (Pu

proviral genome, along with a deamination-independent mechanism that works prior to the pro  
aves SPHK2 which is released from cells and remains enzymatically active extracellularly (Pub  
the TAP complex and inhibits peptide translocation by specifically blocking ATP-binding to TAF

inase activity of mTORC1. Amino acid-signaling to mTORC1 requires its relocalization to the ly

PubMed:28978524, PubMed:18799424, PubMed:24912431). Involved in the AKT signaling casc

s are clustered in a region of chromosome 12q13. Two transcript variants encoding two differer

orting cytotoxic 7beta-hydroxycholesterol (PubMed:17408620).

transmembrane ephrin-B ligands including EFNA1 and EFNB3. Upon activation by ephrin ligands,

ER) stress, inserted into ER membranes, with N-terminal DNA-binding and transcription activation. Alternative splicing results in multiple transcript variants. [provided by RefSeq, Aug 2011]

target genes, negatively regulates androgen receptor signaling and androgen-induced cell proliferation.

binding to receptors (FGFRs) and inhibiting the FGF-mediated signaling.

inhibits cell proliferation and tumorigenesis by inhibiting the CUL4A-RBX1-DDB1-VprBP/DCAF1 E3 ubiquitin ligase complex on the cell surface and intracellular activation of LCK that phosphorylates the ITAM motifs of

trypsin-3, chymase, chymotrypsin, and kallikrein-3 (PubMed:11747453, PubMed:30692621). Activates

MDM2 ('Thr-187' phosphorylated-form), thereby promoting its degradation by the proteasome.

activity. May also bind CCNB1 mRNA. Alternatively, may also regulate p53/TP53 activity through direct

histone-DNA interactions and promote interaction of the modified histones with other proteins which are involved in tissue repair. May be a marker of basal cell differentiation in complex epithelia and therefore

neurodegeneration. Enhances desensitization by increasing both the rate and extent of desensitization.

h HSD17B4, catalyzes the hydration of trans-2-enoyl-CoA and the dehydrogenation of 3-hydro

(PubMed:12873986). Binds to the interleukin-6 (IL-6)-responsive elements identified in the pro  
sicles (ILVs) that are generated by invagination and scission from the limiting membrane of the

ation of ubiquitinated-I-kappa-B-alpha. Required for TNF-alpha-induced p65 nuclear translocat  
also bind EPHB2 and EPHB3 (PubMed:8070404). Binds to, and induces collapse of, commiss

May block ERK2 activation stimulated by ABL1 (Probable). May alter cell morphology and cell

; does not seem to be essential for PGC migration (By similarity).

of F(1) is coupled via a rotary mechanism of the central stalk subunits to proton translocation. F

NA), which is further cleaved by the cytoplasmic Dicer ribonuclease to generate the mature miRNA. This pathway is a form of post-transcriptional quality control, a mechanism that selectively attenuates the translocation of newly synthesized

subset of neuronal lineages. It has been shown that activation of some of these genes requires establishment and/or maintenance of bulk H3K4 trimethylation (H3K4me3), global transcriptional silencing

has been identified. One transcript variant is experimentally supported, but it doesn't encode a protein

NA), which is further cleaved by the cytoplasmic Dicer ribonuclease to generate the mature miRNA

way form the junction to release hairpin-shaped pre-miRNAs that are subsequently cut by the cytoplasmic

1). Along with DNA polymerase POLD1 and DNA polymerase POLK, has a role in excision repair

transcription (PubMed:22722849, PubMed:30653310). H3K18Ac is mainly present around the transcription

to demonstrate that this gene is a lincRNA tumor suppressor. [provided by RefSeq, Mar 2012]

specific chromatin remodeling complex (nBAF complex). During neural development a switch from

It recruits the CSA complex (DCX(ERCC8) complex), nucleotide excision repair proteins and ERF1 to mediate their hypotensive effects in blood vessels.

It is involved in cell proliferation and flagellin-stimulated inflammatory response. Phosphorylates the epidermal growth factor receptor.

It is involved in DNA replication. The BCDX2 complex was originally reported to bind single-stranded DNA, single-stranded gDNA, and thus in processing HR intermediates late in the DNA repair process; the function may be linked to the proteasome and promoting mitotic exit (PubMed:19820702, PubMed:19822757, PubMed:27184444).

It recognizes DNA sequences, either 5'-AGSAGAGTA-3' (S=C or G) or 5'-GTTCGAGTA-3'. Can bind to beta-glucuronidase.

Its activity increases during S and G2 phases and decreases at M phase when it is hyperphosphorylated.

It is involved in blood pressure, endocrine, immune, cardiovascular, and renal function. Consists of two major subunits.

It is involved in synaptic vesicle exocytosis (By similarity). This complex may have the potential to couple synaptic vesicle exocytosis to the cell cycle.

lys-27' (H3K27me3) (By similarity). Plays a role in the lineage differentiation of the germ layers

NA decay (PubMed:19909337). Modulates the inflammatory response by promoting the degrac

containing CENPA. Component of the heterotetrameric CENP-T-W-S-X complex that binds and  
NA), which is further cleaved by the cytoplasmic Dicer ribonuclease to generate the mature miF

ogenic genes via its phosphorylation. Phosphorylates PPP2R5B thereby stimulating the asser  
NA), which is further cleaved by the cytoplasmic Dicer ribonuclease to generate the mature miF

> H3K27me2 (PubMed:22323599, PubMed:30923826). Compared to EZH1-containing comple  
n PLK4 at the outer boundary of a newly forming CEP152 ring structure (PubMed:24997597). /  
NA), which is further cleaved by the cytoplasmic Dicer ribonuclease to generate the mature miF

otes transcription of LCN2 and DEFB4. Is recruited to IL-6 promoters and activates IL-6 but dec  
specific tag for epigenetic transcriptional repression. Mainly functions in pericentric heterochroma

s. Plays an important role in regulating the expression of genes that are involved in lipogenesis

hydroxylation and spontaneous O-dehydroxypropylation (PubMed:26038696).

er, by binding to matrix attachment regions (MARs) of DNA and inducing a local chromatin-loop

inner membrane that drives transmembrane transport and the ATP synthase. Cytochrome c o:

er, blood pressure, endocrine, immune, cardiovascular, and renal function. Consists of two majc

300 substrates each. Some of the targets are downstream kinases such as MAPKAPK2, which

muscle stem cell differentiation (By similarity).

er, blood pressure, endocrine, immune, cardiovascular, and renal function. Consists of two majc

histone gene transcription and progression through S phase.

PubMed:26221039). The physiological relevance of protein/histone deacetylase activity is uncle

poly(G) and poly(A), but not to poly(U) or poly(C) RNA homopolymers. Binds to the 5'-ACUAGC

ed by RefSeq, May 2015]

er promoter via interaction with RRN3.

signaling and stability (By similarity).

Seq, Oct 2015]

ement; MEIS2 is not involved in complex DNA-binding. Probably in complex with PBX1, is invol  
NMD), and is thus unlikely to produce a protein product. [provided by RefSeq, Feb 2017]

of F(1) is coupled via a rotary mechanism of the central stalk subunits to proton translocation (F

is a lectin-like receptor that functions as a platelet receptor for the lymphatic endothelial marker, FcγRIIb (CD102b), which is further cleaved by the cytoplasmic Dicer ribonuclease to generate the mature miR-155.

Regulation of signaling pathways including T-cell receptor (TCR), CD28 and ITGAL; proposed to be implicated in the regulation of these receptors.

is the activity of down-stream effectors, such as adenylate cyclase (PubMed:10906333, PubMed:105868).

is a lectin-like receptor that functions as a platelet receptor for the lymphatic endothelial marker, FcγRIIb (CD102b), which is further cleaved by the cytoplasmic Dicer ribonuclease to generate the mature miR-155.

is a phospholipase A2 (PLA2) enzyme (PubMed:105868). Preferentially hydrolyzes the ester bond of the fatty acyl group attached at sn-2 position of phospholipids.

is a phospholipase A2 (PLA2) enzyme (PubMed:105868). Transports LPC carrying long-chain fatty acids such as LPC oleate and LPC palmitate with the help of apolipoproteins.



required for longitudinal bone growth through regulation of chondrocyte differentiation. May be involved

in blood pressure, endocrine, immune, cardiovascular, and renal function. Consists of two major

The dynamic control of cilium length is essential in the regulation of mechanotransductive signaling

in the genome. [provided by RefSeq, Jul 2008]

by regulating RANKL-induced calcium oscillations in preosteoclasts and mediating calcium extrusion and trafficking in sensory neurons. Probably plays a role in trafficking proteins in photoreceptor cells

and thereby stops it from regulating the transcription of its target genes. This transcript is also

(PubMed:26503245). Its double-stranded DNA helicase activity requires either a minimal 5'-single

complex (which can induce the formation of aberrant centriolar protein complexes) by interferin

of F(1) is coupled via a rotary mechanism of the central stalk subunits to proton translocation. F

ilarity). Inhibits TGF-beta signaling through interaction with SMAD4 and NCOR1. Binds to chro

NA), which is further cleaved by the cytoplasmic Dicer ribonuclease to generate the mature miF

e of GDP to GTP, converting inactive GDP-bound RAB8A and RAB39B into their active GTP-b  
itch in subunit composition of the npBAF and nBAF complexes. As neural progenitors exit mito

ex ATP8A1:TMEM30A seems to play a role in regulation of cell migration probably involving flij

NA), which is further cleaved by the cytoplasmic Dicer ribonuclease to generate the mature miF

NA), which is further cleaved by the cytoplasmic Dicer ribonuclease to generate the mature miF

NA), which is further cleaved by the cytoplasmic Dicer ribonuclease to generate the mature miF

so mediates monoubiquitination of FANCL and FANCI (PubMed:16916645, PubMed:17938197

regulates the glycine concentration in synaptic junctions in the central nervous system, by binding

where most DUF1220 domains are located, have been implicated in a number of developmental processes, including the development of a cytochrome P450 reductase (NADPH--hemoprotein reductase) (PubMed:11555828, PubMed:11555829)

miRNA), which is further cleaved by the cytoplasmic Dicer ribonuclease to generate the mature miRNA

of auditory nerve fibers and reducing the range of dynamic hearing. This may protect against acoustic trauma, possibly through the regulation of cellular calcium homeostasis. Phosphorylates PLN, a regulator of the phospholipase C $\beta$  to prevent degradation of cyclin-A (CCNA1 and CCNA2) (PubMed:21596315). Plays an important role in the regulation of

activity of KAT7/HBO1 in a CDT1-dependent manner, inhibiting histone H4 acetylation and DNA replication

miRNA), which is further cleaved by the cytoplasmic Dicer ribonuclease to generate the mature miRNA. Phosphorylates pyridoxamine 5'-phosphate (PNP) and pyridoxamine 5'-phosphate (PMP), with order of substrate preference

evoked currents by retaining the channel intracellularly. May regulate the intracellular trafficking

in the development of the ventral forebrain (By similarity). May play a role in craniofacial patter

NA), which is further cleaved by the cytoplasmic Dicer ribonuclease to generate the mature miF

ncoding different isoforms have been found for this gene. [provided by RefSeq, Feb 2016]

versible TST reactions provides a model for the physiologically relevant reaction with thiosulfate

complex is required for telomere maintenance via recombination and mediates sumoylation of  $\epsilon$

he endoplasmic reticulum (ER). All subunits are required for a maximal enzyme activity. May be  
NA), which is further cleaved by the cytoplasmic Dicer ribonuclease to generate the mature miF  
NA), which is further cleaved by the cytoplasmic Dicer ribonuclease to generate the mature miF

islocation. Phosphorylates in vitro GLI2, as well as GLI1 and GLI3, although less efficiently. Als

-HDAC1 repressor complex. Upon calcium influx, RB1 is dephosphorylated by calcineurin, which

ng pathway via two different mechanisms that probably work in parallel to reach the same effec  
ate) (PubMed:25320081). Participates in mitochondrial genome maintenance, regulation of mi

inhibition of TRPA1 by TRPV1 and increasing the single-channel open probability of the TRPA1-TRPV1 complex (TRPA1-TRPV1). In males, not required for germ-cell sex determination, but required to allow the spermatogonium to differentiate by binding to specific promoters repressing CEBPA binding to its target gene promoters (PubMed:1309651).

Regulates the activity of L-type calcium channels that contain CACOP1 subunit (PubMed:1309651).

in the mammary mesenchyme and this increases the sensitivity of these cells to BMPs and allows for their differentiation.

inner membrane that drives transmembrane transport and the ATP synthase. Cytochrome c oxidase subunit I.

and cell migration, and it is involved in cell cycle regulation. Its upregulation in multiple cancer types is associated with poor prognosis.

secreted immunoglobulins mediate the effector phase of humoral immunity, which results in the elimination of pathogens.

guidance molecule during development and may be involved in the development of the retina. It is also involved in the regulation of glucagon secretion by glucose in alpha cells; however such data require additional evidence. It is also involved in the activation functions of ESR1 and plays a role in the nuclear localization of ESR1. It regulates a variety of cellular processes.

PubMed:8820107). Also produced in the brain by primary astrocytes, and esterifies free cholesterol

proliferating T cells. T cell progenitors shift from a highly proliferative state towards their terminal phase of differentiation (P

complex is regulated by binding with 7SK snRNA (PubMed:11713533). Plays a role during muscle atrophy in mice where LP-BER proceeds; endonuclease FEN1 cleavage activity on substrates with double

trafficking.

regulation of REST (PubMed:23178126). Also controls the expression of genes involved in somatic development. Inhibitory function (By similarity). Following TCR engagement, LAG3 associates with CD3-TCR

has several different isoforms. [provided by RefSeq, Feb 2016]

anions like chloride, bicarbonate, formate and hydroxyl ion and divalent anions like sulfate and

endothelial cells of blood vessels (By similarity).



signaling pathway downstream of the ephrin ligand is referred to as reverse signaling. Binds to receptor tyrosine kinases and mediates the translocation of APAF1 into the nucleus after proapoptotic stress. Down-regulates the expression of LGN (Leucine-Glycine-Nucleation factor A), which is further cleaved by the cytoplasmic Dicer ribonuclease to generate the mature miR-145.

Regulates CDC42, RHOA and RAC1. Promotes the conversion of CDC42, RHOA and RAC1 from inactive to active GTP-bound states.

Involved in chemotaxis and chemokinesis by affecting dendritic cell costimulatory molecule expression and cytokines and chemokines. The clathrin lattice serves as a mechanical scaffold but is itself unable to bind directly to membrane receptors, such as angiotensin III and IV, neuropeptides, and chemokines. May also be involved in the regulation of cell migration.

Involved in the regulation of cell migration (PubMed:27214549). May contribute to the immune evasion of H.pylori by restricting M1 migration.

Expressed in lymphoid organs, such as the skin and gut, but also in other nonbarrier tissues like liver and spleen. Mediates the activation of FAK2/FAK1, a key mediator of integrin signaling events leading to the regulation of actin cytoskeleton dynamics. Mediates the regulation of PERK-mediated unfolded protein response (By similarity). Activates apoptosis independent of p53 and probably other components of the cytoplasmic RNA decay machinery to the bound ARE-catalyzed mRNA decay.

Interacts with calmodulin. Also plays an essential role during cellular mitosis and receptor capping. Involved in the regulation of cell migration.

gh RET cleavage.

nduces T-cell proliferation and NF-kappa-B activation in a T-cell receptor/CD3-dependent man

uch as hyaluronan/HA, collagen, growth factors, cytokines or proteases and serves as a platfor  
the endosomal/lysosomal system where the antigen processing and binding of antigenic peptid

in neuronal recognition mechanism. In hippocampal neurons, may regulate dendritic spine den  
cert with KRIT1 and MPP5 to establish and maintain correct endothelial cell polarity and vascul

it. Required for normal male and female fertility. Promotes reorganization of the actin cytoskele

on of gamma-delta T-cells, a subpopulation of T-cells residing in epithelia and involved in tissue  
entiation via its effects on NF-kappa-B activation (PubMed:12917690). Negative regulator of W  
, regulates myosin either directly by phosphorylating MYL12B and MYL9 or through inhibition o  
eaks (DSBs), thereby facilitating the template-guided repair of transcriptionally active regions o

ee and the membrane mechanical properties. Plays also a role as a modulator of actin dynamic  
nection between the 2 temporal lobes of the cerebral cortex. Also involved in guidance of contr

zymes generated during infection. Generally is promoting inflammation. Can signal synergistic: d:16480718, PubMed:16410248, PubMed:17381073, PubMed:18095711, PubMed:21288888,

thus seems to provide a feedback mechanism to limit weight gain.

s FLT4 signaling. Modulates KDR signaling by forming heterodimers. The secreted isoform 3 n regulation of cell adhesion and motility through phosphorylation of CTNNB1 (beta-catenin) and

is implicated in cell growth and survival, cell adhesion and cell migration. GAS6/AXL signaling

na-glutamyl compound. Initiates extracellular glutathione (GSH) breakdown, provides cells with '). Plays an important role in the down-regulation of neuronal excitability (PubMed:11929858, P ersion to GM3 (By similarity). Has cholesterol transfer activity (PubMed:17552909).

ubsequently regulates transcription factor AP-1 (activating protein-1) (By similarity). GNA12-de

hosphorylates various substrates: Hsc70-interacting protein/ST13, TP53/p53, HDAC5, and arr s as a transcription coactivator in adipocytes by promoting the recruitment of PPARG to promot

a role in translating the epigenetic signatures into cell type-specific enhancer-driven transcriptio

ilar stress mediated by exposure to anisomycin or UV (PubMed:24512202).

nd this binding is essential for IGF1 signaling (PubMed:22351760). ITGA6:ITGB4 binds to IGF

acellular potassium; as external potassium is raised, the voltage range of the channel opening

ng macrophage activation and IL1B secretion which restricts intracellular bacterial growth (By s

H3K4me1) or dimethylated (H3K4me2) (PubMed:27735137). Also mediates deamination of me  
nucleus.

gainst C.albicans. Contains two BBXB heparin-binding consensus sequences that appear to fo

is (By similarity).

stream signaling molecules. Following activation by ligand, interacts with the PI3-kinase subuni

PubMed:30374167, PubMed:30385749). Crotonylation marks active promoters and enhancers

, blood pressure, endocrine, immune, cardiovascular, and renal function. Consists of two major

esis, organization and transport.

ral RNA, resulting in the inhibition of protein synthesis, thus terminating viral replication. Can m

as MAPK4 and MAPK6 and activates the downstream target MAPKAPK5, a regulator of F-actin  
2- dependent stereospecific hydroxylation (with S stereochemistry) at the alpha-carbon (C-alpha  
are key regulators of many important physiological processes. Plays an important role in growth

may play a role in endothelial cell-cell adhesion via cell junctions (PubMed:27958302). Hetero-  
acids into the canaliculus, uptake of bile acids from intestinal contents into intestinal mucosa

phosphate reabsorption by cleaving DMP1- and MEPE-derived ASARM peptides (PubMed:185971

phatidic acid, sphingomyelin, phosphatidylcholine, phosphatidylinositol, phosphatidylglycerol, ce

eneration of spliced peptides resulting from the ligation of two separate proteasomal cleavage  
cell adhesion and cell migration (PubMed:23704371, PubMed:30367560, PubMed:23867277).  
insulin receptor (IR) signaling in skeletal muscle. Regulates insulin-induced tyrosine phosphory

roteoglycan GPC2. Required for normal brain development, especially for normal developmen

etes with GRK2 for binding to LPAR1 thus affecting the signaling properties of the receptor. Re

nsin. May promote mineralization of the extracellular matrix during osteogenic differentiation by

all during the disease process of atherosclerosis (PubMed:8107690).

gy, including cancer and various autoimmune diseases (PubMed:21376174). CCL20 acts as a

er integrin ligands to site 1 (PubMed:23125415, PubMed:24789099). The soluble form is chem

on and bud growth in metanephroi (By similarity). Inhibits WNT1/WNT4-mediated TCF-depend

1685497, PubMed:23184945). Mediates reorganization of the actin cytoskeleton and axon grow

ription, and might thereby contribute to pT reg cell differentiation in the spleen and lymph node:

Due to functional redundancy between members of the SRC kinase family, identification of the

ocal adhesions. Supervillin-mediated down-regulation of focal adhesions involves binding to TR

and activity in lysosome (PubMed:31036939). Involved in the regulation of lysosomal morpho

romote 'Lys-63'-linked ubiquitination of target proteins. Inhibits activation of NF-kappa-B in resp

haride structures (PubMed:8643456). Glycosphingolipids are essential components of membr

[provided by RefSeq, Nov 2008]

on sensitizes cells to TNF-induced apoptosis. Is a potent inhibitory factor for osteoclast differen

0). Phosphorylates: PPP1R12A, LIMK1 and LIMK2 (PubMed:11340065, PubMed:11399775). I  
omotes attachment, spreading and dendrite outgrowth in melanocytes.

The eIF-3 complex is also required for disassembly and recycling of post-termination ribosomal

progression after DNA replication arrest (PubMed:20883816).

osome-like induced structures). Along with WDFY3, required to recruit ubiquitinated proteins to F

Med:29212815). Regulates neuronal process morphology in the intact central nervous system (I

during T-cell activation (By similarity). Down-regulates CD2-stimulated adhesion through the co

osomal tethering complexes which is proposed to be involved in the Rab5-to-Rab7 endosome c

s, where it is required for transmission and restoration of repressive histone marks, thereby pre  
vis X and in lymphocyte homing to Peyer patches. Has no activity toward O-linked sugars. Its si

acts by competing with calcineurin/PPP3CA for NFAT protein binding, hence preventing NFAT e  
ression and beta-cell function. Appears to have a role in cell signaling in mature and developing

of CLASP1 and CLASP2.

1 receptor ITGA5 ITGB1 to the plasma membrane that enables continuous directional cell migr  
egative feedback response to attenuate NF-kappaB activation through the deubiquitination of I

involved in the BCAR1/CAS-mediated JNK activation pathway.||Acts as an adapter protein that n

he inflammatory response. Recognizes mycoplasmal macrophage-activating lipopeptide-2kD (1

[2]

1LC3B. In turn, protects the cell against oxidative stress-induced cell death as a consequence of  
tion promotes epithelial-mesenchymal transition (EMT) leading to ERZ phosphorylation and trig  
) acts as a putative regulator of mRNA stability and/or translation rates and mediates mRNA nu

may act as a tumor suppressor for melanoma. Represses the CLOCK-ARNTL/BMAL1 heterod

milarity).

PubMed:30220460).

of the MB1 domain in the myelin basic protein (MBP) promoter (By similarity).



rentiation. May also be involved in mitochondrial fission by converting phosphatidic acid to diacylglycerol.

PubMed:12676087, PubMed:12699629). Binds to the single-stranded 5'-(GTGTGG)(4)GTGT-3' tetranucleotide, inhibiting its activity and allowing activation of the Shh signaling. Its ligand is unknown (By similarity).

neuronal brain development (By similarity). Regulates the migration of cerebellar granule cells in the presence of growth factor-mediated signaling cascades. Required for normal organization of the cardiac base.

HIV-1: dNTPase activity reduces cellular dNTP levels to levels too low for retroviral reverse transcription. Interacts with the RECK-ADGRA2-Fzd-LRP5-LRP6 complex (PubMed:30026314). ADGRA2-tethering factor.

PubMed:16143324). Has a role in regulation of the actin cytoskeleton, cell polarity and cell adhesion. It is involved in autophagy, the major intracellular degradation process by which cytoplasmic materials are packaged into autophagosomes.

G-proteins (By similarity).

y).

ved to release an N-terminal fragment of APP (N-APP). N-APP binds TNFRSF21; this triggers  
n macrophage pyroptosis, a caspase-1-dependent inflammatory form of cell death and is the n  
e biogenesis disrupt the interaction between NOP53 and RPL11 allowing RPL11 transport to tl  
on. May function as an oxygen sensor regulating the KCNK3/TASK-1 potassium channel and H

gulator that translocates to the nucleus) and the promotion of apoptosis induced by tumor necro

ase activity of DNM1. Promotes DNM1 oligomerization. Promotes activation of the Arp2/3 com

rtly acid oxidation (By similarity). At the villus tip of the crypt-villus axis of the small intestine ma

sidering that its appropriate peptide substrate may remain unidentified.

256955).

Also named APP-CTF) by the gamma-secretase complex to generate amyloid-beta, while it red

role in the response to hypoxia depends on the cell type; it mediates mTORC1 inhibition in fibr  
ation complex. Under hypoxic conditions, the hydroxylation reaction is attenuated allowing HIF:

rest. Isoform 1, but not isoform 2, has the ability to induce cell cycle arrest in G1 and maintain

(By similarity). Acts as a negative regulator of central nervous system angiogenesis. Inhibits sp

or conditions localizes to the ER membrane and in response to excess cholesterol in the PM is

to the activation of the enzyme (PubMed:27650958, PubMed:27373336). Activates deubiquitin

ation of NFE2L2/NRF2, glycation impairing NFE2L2/NRF2 function (By similarity). Also able to

. In this way, SMAD2 may recruit substrates, such as SNON, for ubiquitin-mediated degradatio

the proteasome (PubMed:30190310). The ability of the SCF(FBXL17) complex to eliminate cc

), PubMed:25527291). Targets PRKN to dysfunctional depolarized mitochondria through the pl

inhibits the renal K(+) channel, KCNJ1, via a kinase-independent mechanism by which it induces

reases basal and insulin-stimulated glycogen synthesis upon overexpression in hepatocytes (B  
oinositol 5-phosphate) via the same basic sequence motif that mediates DNA binding and nucl

Med:21964062). Required for ZFP36 localization to cytoplasmic stress granule (SG) and P-bod

oform 2 appear to be redundant in their ability to modulate CD4 T-cell responses. Isoform 2 is  
s and mediating constriction of the apical endfoot (By similarity). In addition, may also act as a  
iamine pyrophosphate and contribute to host thiamine (vitamin B1) homeostasis (PubMed:243

ilation of PIAS3, either by degradation of PIAS3 through the ubiquitin-proteasome pathway or e

ving OFD1 from centriolar satellites via the autophagic pathway. Through its interaction with th  
1 NK cell cytotoxicity by controlling polarization of microtubule-organizing center (MTOC), and p

asomal degradation. Binds the DNA sequence 5'-AACCAAT-3'.

:h PCNA (PubMed:24695737).

/ play a role in neurite outgrowth.

velopment, granulosa cell differentiation and luteinization (PubMed:21321049, PubMed:22229

eq, Feb 2016]

ites the centrosomal levels of kinase AURKA/Aurora A during mitotic progression by promoting

tors or insulin. Mediates negative regulation of phagocytosis, mast cell activation and dendritic

ase activity (PubMed:19945436, PubMed:19389623).

phosphorylates glycerol-3-phospho-1D-myo-inositol 4,5-bisphosphate to glycerol-3-phospho-1D-myo-inos

ing different isoforms. [provided by RefSeq, Jul 2014]

activity and MAP3K8-mediated signaling. Acts as a negative regulator of MAP3K3-mediated activat

Is unsaturated long-chain ceramides, including C18:1-, C20:1- and C24:1-ceramides (PubMed:

growth factor signaling (By similarity).||[Isoform 1]: heparan sulfate basal lamina glycoprotein tha

NAH (involved in signaling); or MAPT and PXN (microtubule-binding proteins). Phosphorylation  
actions (By similarity). May also function as a transcriptional coactivator, stimulating transcriptio

2, PubMed:23416111). Plays a role in controlling cellular ATP levels by regulating phosphorylat  
higher frequency of acute alcohol intoxication among East Asians than among Caucasians could

circuits, endocytosis regulation may influence the internalization of PHF-tau aggregates (By si

factors such as MAPK8/JNK1. Required for histone H4 acetylation at double-strand breaks (DS

he brain and elicit inflammatory responses. Promotes both tau aggregation and TPK II-mediate

racellular iron homeostasis, thus triggering the activity of Fe(2+) prolyl hydroxylase (PHD) enzy  
x ATRX:DAXX which has ATP-dependent DNA translocase activity and catalyzes the replicatio  
to modulate mRNA processing and RNAP II stability by inhibiting pre-mRNA 3' cleavage.

ound for this gene. [provided by RefSeq, Jul 2008]

gnaling cascades downstream of NTRK2 (PubMed:11152678). During development, promotes

: May induce the production of pro-inflammatory cytokines such as IL6 in monocytes.||Plays an  
families, including retroviridae: human immunodeficiency virus type 1 (HIV-1), human immunoc

ncluding murine leukemia virus, polyomavirus enhancer, T-cell receptor enhancers, LCK, IL3 a  
activation. May play a role in membrane transport and/or integrin dependent signal transductic

atopoietic cells). Essential for cell proliferation within the dentate gyrus of the hippocampus an  
transactivation and apoptosis. Also induces G2 arrest and apoptosis in a p53-independent ma



123922). Maintains partially unfolded proteins in a state appropriate for subsequent refolding by  
; cell apoptosis.

und to be much more dynamic than E-cadherin/catenin complexes and CTNNA1 was shown n

ssDNA, while the 3'-ssDNA cleavage is prevented by the presence of RPA. Also involved in DN  
ie extracellular matrix (ECM), the migration and invasion of endothelial cells into the ECM. May

nine-dependent and -independent transcriptional activity of the thyroid hormone receptor gene

forms exhibit the same level of activity (By similarity).

γ E2 secretion (PubMed:21242590).

purinic/aprimidinic (AP) site-terminated flap. Acts as a genome stabilization factor that preven  
f several signaling cascades. Activation of PLCG1 leads to the production of the cellular signal

n promoting cell proliferation seems to be cell-type specific. Promotes PGF-mediated proliferat

act with homeostatic chemokines. Acts as a receptor for chemokines including CCL2, CCL5, CC

in cancer cell types. In elastin producing cells, associates with tropoelastin intracellularly and fi

3791, PubMed:12526812). Regulates protein trafficking to lysosomes and, also the activity of l

; by phosphorylating and inhibiting GYS1 activity and hence glycogen synthesis. May also med

α-rich initiator (Inr) and an upstream E-box. Required for the formation of functional ARID3A DN

chain fatty acids (PubMed:30850536). Mitochondrial trifunctional enzyme is a heterotetrameric

PubMed:30850536). Mitochondrial trifunctional enzyme is a heterotetrameric complex composed

CREST-mediated transcription in resting neurons. Upon calcium stimulation, HDAC1 is release

with ARNT; heterodimer binds to core DNA sequence 5'-TACGTG-3' within the hypoxia respons

402688, PubMed:7504010, PubMed:17189421, PubMed:20364150, PubMed:25880248, Publ

including a peptide derived from the signal sequence of HLA-DPB1 (APRTVALTA) (PubMed:7

mRNA splicing. N6-methyladenosine (m6A) has been shown to alter the local structure in mRN

ers inhibit signaling via G proteins and mediate activation of alternative signaling pathways. Re

sor cells proliferation. Inhibits the binding of E2A-containing protein complexes to muscle creat

alpha- and beta-subunits themselves (PubMed:7665574, PubMed:21854986). Can form an ac

various histone methyltransferase complexes. In embryonic stem cells, it associates with the PI upon acidification of the extracellular medium (PubMed:21653227, PubMed:22431633). The h

7). Activated by upstream kinases including ROCK1, PAK1 and PAK4, which phosphorylate LI

a role in gamete interaction.

mplex-type N-glycans, such as those found on EGFR, TGFR (TGF-beta receptor) and CDH2 (F

ity toward skin preelastic and elastic fibers (PubMed:20876573).

at is involved in diverse functions such as remodeling of the vasculature, angiogenesis, tissue

roduction by the 3MST/CAT pathway is regulated by calcium ions.

y of the Golgi apparatus via the p53-dependent pro-survival pathway (PubMed:16507995). App

the DNA of their target genes and the individual dimers have distinct preferences for different  
omeostasis. In collaboration with RELA/p65 enhances NFATc1 promoter activity and positively

trix by up-regulation of the collagenases MMP1, MMP2 and MMP13, and thereby facilitates cel

neurons of the central nervous system. HCNP increases the production of choline acetyltransferase

al mRNA and protein synthesis. The cytoplasmic isoform PML-14 can restrict herpes simplex v

indimerization with RXRA and is antagonized by NR2C2. May be required for the propagation of  
s in cofilin dephosphorylation (PubMed:15671020). In response to increased Ca(2+) levels follic  
t PRIM2) is recruited to DNA at the replicative forks via direct interactions with MCM10 and WC  
n regulators. Also acts as a regulator of cellular polarity by remodeling the actin cytoskeleton; p

arrest by positive and negative regulation of the cell cycle. Can promote cell growth by phospho  
ation and vascular-like structure formation.

(2+) or ZN(2+) for the ascorbate-mediated GPC1 deaminase degradation of its heparan sulfate

several alternatively spliced transcript variants have been found for this gene. [provided by RefSeq  
factors (IGFs) by cleaving IGF-binding proteins. Inhibits signaling mediated by TGF-beta family  
activated complex, rather than by solubilizing the substrate.][Saposin-B stimulates the hydrolysis  
as a calcium-leak channel that allows the passive movement of calcium from endoplasmic re

om phosphatidylinositol 3,4,5-trisphosphate, phosphatidylinositol 3,4-diphosphate, phosphatidy

cycle progression, cell proliferation and apoptosis. Required for early embryonic development

transfer of a fatty acyl group from glycerophospholipid to the hydroxyl group of lysophospholipid  
and ATM, promotes ATR activation and its recruitment to DSBs in the S/G2 phase facilitating the  
y (DNAH11, DNAH9 and DNAH5) (By similarity). Together with RFX6, participates in the differ

PubMed:16213824). In fibroblast, is required for EGF-stimulated phosphorylation of CREB1 and I

large neutral amino acids such as phenylalanine, tyrosine, L-DOPA, leucine, histidine, methionin  
um. SLC8A1 mediates the export of Ca(2+) from the cell during the next phase, so that cytopla  
natin remodeling complex (npBAF complex) and the neuron-specific chromatin remodeling con

enters the nucleus (PubMed:28753426). ISGF3 binds to the IFN stimulated response element  
ncy (PubMed:11006110, PubMed:19589875). Does not sulfonate cortisol, testosterone and do

activator of Notch pathway by mediating cleavage of Notch, generating the membrane-associat

g to its target gene promoters (PubMed:20176812).

extracellular matrix production, immunosuppression and carcinogenesis. The formation of the  
larly efficient epithelial polarization and barrier formation (By similarity). Plays a role in the reg  
ternate polyadenylation sites has been found for this gene. [provided by RefSeq, Jul 2008]

-apoptotic activity is activated via its interaction with PPP1R13B/ASPP1 or TP53BP2/ASPP2 (F

mechanisms of action include direct activation or repression, indirect activation or repression via cofactor IFIH1 (PubMed:30193849). Promotes ISGylation of 14-3-3 sigma (SFN), an adapter protein in the forebrain during embryonic brain development. Binds the endoplasmic reticulum resident receptor

o. Has no hyaluronidase activity in granulosa cells in vitro.

PubMed:7649300, PubMed:11825900). Promotes KCNA4 channel closure (PubMed:7649300, PubMed:11825900) and viral entry, MARV and EBOV GP1,2-mediated viral entry and SARS-CoV S protein-mediated

1-(sn-3'-phosphoryl)-ethanolamine phosphate, a potential physiological compound (PubMed:9607309). Through independent activation of TLR8 (PubMed:31778653). Plays also a key role in degradation of mitochondria

ventricular wall damage.

These proteins are recognized by RNF146, which mediates their ubiquitination and subsequent degradation

activation. Plays a role in glomerular cell migration. Plays a role in pathological neovascularization

pathway. May have an important role in skeletogenesis during postnatal growth (By similarity)

membrane integrity and in cortical lamination (By similarity). Binding to the COL3A1 ligand inhibits

the induction of neurite outgrowth. Functions as a protease inhibitor by blocking access of secreted

membrane proteins, such as stimulated growth factor receptors, lysosomal enzymes and lipids. (PubMed:112024). Mediates the NR1D1-dependent repression and circadian regulation of TSHB expression. Promotes F-actin, leading to increase MKL1/MRTF-A presence in the nucleus and promote SRF:MKL1/MRTF-A

and cGMP (PubMed:23800469, PubMed:10801446) or not (PubMed:10608844, PubMed:10548444) nuclear localization (RAT) (PubMed:27499293).

stimulates neurite outgrowth in newborn neurons migrating to reach the cortical plate. May activate or repress

apoptosis (By similarity). Inhibits PTK2/FAK1 and PTK2B/PYK2 kinase activity, affecting the

regulation of the expression of myocyte enhancer factors. Involved in the MTA1-mediated epigenetic methylation activity.

binding/depolymerizing factor cofilin. Decreased cofilin activity may lead to stabilization of actin

ore vesicles fusion as well as controls the location and efficiency of their synaptic release (By s  
the interaction between FBN1 and ELN (PubMed:17255108).

·mediated viral entry, MARV and EBOV GP1,2-mediated viral entry, SARS-CoV S protein-medi  
major coding-region determinant of instability (mCRD) domain.

is stimulated in response to Ca(2+) signals (By similarity). Seems to be involved in hippocamp  
orm (PubMed:20381137, PubMed:24095279, PubMed:25936802). In its active form participates  
ant role in neuronal signaling, including in the parasympathetic, but not sympathetic, control of l

d by RefSeq, Jan 2017]

s3P activity (PubMed:28561066).

en APBA2 and APP. The intracellular fragment A1c1CD suppresses APBB1-dependent transact



eurotransmitters.

s actin filament reorganization via its interaction with the Arp2/3 complex. Actin remodeling acti  
he closed structure of the proteasome via an active gating mechanism. Component of the sper

IR of diverse inflammatory mRNAs (such as ceruplasmin) and suppresses their translation. In t  
iated endosome fission: localizes to endosome membrane tubules and promotes recruitment c  
y anchor the podocyte slit diaphragm to the actin cytoskeleton in renal glomerolus. Also require

ie up-regulation of the oxytocin receptor gene at parturition (PubMed:10527846).

adation are inhibited by calmodulin. Through CCND2 and CCND3 degradation induces cell-cyc

uits the PRC2 complex to CpG islands and contributes to embryonic stem cell self-renewal. Als

ul7-RING(FBXW8) complex recognizes and binds IRS1 previously phosphorylated by S6 kinas

75408). Then switches as an inhibitor of APC-FZR1 complex during S and G2 leading to cell-c  
rmed cells when is overexpressed (By similarity).

8347093, PubMed:26647308). Can act with CTBP1 to synergistically repress transcription but

s a key role in m6A methylation, possibly by binding target RNAs and recruiting the WMM com

teracting with cellular inhibitors of apoptosis proteins (cIAPs) and thereby inhibiting their recruit

A/NFKB3 target genes when complexed with RELA (PubMed:15029197). May also specifically

m the 43S pre-initiation complex (43S PIC). The eIF-3 complex stimulates mRNA recruitment t  
ription regulators. Also acts as a regulator of cellular polarity by remodeling the actin cytoskelet

rtation, an essential protein for cholesterol absorption, to the plasma membrane by recruiting M  
ibMed:23303788). May repress COX4I2 transactivation induced by CHCHD2 and RBPJ (PubM

ons.

The resulting loss of PPARG target gene transcription inhibits adipogenesis and promotes oste

assembles T loops and prevents telomere fragility by counteracting telomeric G4-DNA structures, which ends with charged C-terminus. May play a role in the inactivation of peptide hormones. May be (PubMed:7740623).

through interaction and nuclear translocation of EYA protein. Acts synergistically with SIX1 to regulate the nucleus via the importin alpha/beta heterodimeric import receptor. The directionality of nuclear

major types of neutral root structures of glycosphingolipids, that constitute a significant portion of cell membranes. Mediates epithelial estrogen responses in the uterus by regulating ESR1 levels and activation. Implicated in

SNRPE, SNRPF and SNRPG are trapped in an inactive 6S pICln-Sm complex by the chaperon

structures that lack 4-hydroxyproline in the third position (PubMed:18487197).

(PubMed:29335528). Also involved in the response to DNA damage (PubMed:26807646, PubMed:31111111). May influence spermatogenesis and male fertility.

the protein translation of DENV RNA via its association with cellular mRNA-binding proteins and the precursor of the second messenger inositol 1,4,5-trisphosphate (InsP3).

ne endosomal membrane involves RAB7A and SNX3. The CSC seems to associate with the cy to Golgi exit of the ATP8A2:TMEM30A flippase complex. ATP8A2:TMEM30A may be involved

and oligosaccharides containing the Galbeta1-4GlcNAc. Catalyzes 6-O-sulfation of beta-benzyl ( sion and polar body extrusion during female germ cell meiosis (By similarity). Plays a role in re:

:20:4-CoA (PubMed:21173190). Has a preference for arachidonoyl-CoA as a donor (By similar

, blood pressure, endocrine, immune, cardiovascular, and renal function. Consists of two major omal membrane involves CCC and WASH complexes (PubMed:28892079). In the endosomes s and lipids. The MVB pathway appears to require the sequential function of ESCRT-O, -I,-II ar

the degradation of the 'Thr-182' phosphorylated form of RIPK3 (PubMed:29883609). Negative

rucial role in pulmonary surfactant homeostasis (By similarity). Has an anti-fibrotic activity by ne polymerizing microtubules (PubMed:23085020).

t sites (EPCS) (PubMed:27044890).

:16354688). Plays a role in postnatal myogenesis, may be involved in the regulation of satellite

during cilium assembly (PubMed:23400999). Regulates the centrosomal location of ODF2 and

on of specific target genes. Plays a critical role in chondrogenesis by activating the transcription

Binds phosphoinositides (PubMed:19168031).

adation of enzymes involved in gluconeogenesis, such as FBP1 (PubMed:29911972).

he type Pro-[Ala,Gly]-[Leu,Met,Gln,Ser,Tyr]-[Glu,Gly,His,Ser,Val,Trp,Tyr]. Does not bind peptic

as it represses the expression of PER1 and in turn is repressed by PER1/2 and CRY1/2. Repri

ys a key role in polyploidization of cells in placenta and liver by regulating the endocycle, proba

fferentiation through down-regulation of EGFR/AKT/MAPK and Wnt signaling pathways (PubM

ucose-dependent insulin secretion in pancreatic beta-cells during the first phase of insulin secr

mplex that selectively accepts ubiquitin from UBE2H and mediates ubiquitination and subsequ

ulum and negatively regulates its expression at the cell membrane.

inhibit VEGFA-mediated signaling by blocking the interaction of VEGFA to its receptor KDR/VE

γ indirectly stimulate the activity of transcription factor KLF7, a regulator of neuronal differentiat

nesis during embryonic development.

gnaling pathway (PubMed:26438880).

ownstream effector RAD51 to DNA damage sites including DBSs and ICLs (PubMed:23401855

n formation, possibly by being involved in the transport of raft lipids to the apical membrane, an  
γ by acting as an important enzyme for intracellular Ca(2+) mobilization in the zona pellucida-in

nhibitor of ZNRF3, an important regulator of the Wnt signaling pathway. Acts as a ligand for friz

SK3B activation and phosphorylation of DPYSL2/CRMP2 followed by destabilization of microtu  
the distal end of the mother centriole where they fuse to initiate cilium assembly. Involved in mi

it mechanism (PubMed:15492226, PubMed:26068852). TIFA-dependent innate immune respo

olved in adaptor protein complex AP-2-dependent endocytosis of the transferrin receptor, it also

brane cleavage of the envelope glycoprotein gp130 and/or the leader peptide gp18LP of the sir

eta- and alpha-anomers of galactose, therefore ensuring a sufficient supply of the alpha-anom

actin filament networks. Also catalyzes actin polymerization in the absence of Arp2/3, creating

3 and RIPK1, which in turn, lead to the activation of transcription factors IRF3 and IRF7, NF-ka

ns epithelial cells (By similarity).

. The resultant detrimental levels of mutations in the proviral genome, along with a deamination

[Seq, Nov 2014]

it is not an anti-apoptotic protein per se.

membrane tubulation (in vitro). May promote the formation of macropinosomes.

l:15657036, PubMed:15907468, PubMed:25931126, PubMed:16368756). Known substrates in

to the Golgi apparatus. Involved in the transport of Shiga toxin from early and recycling endosc



rated stress response (ISR) required for adaptation to amino acid starvation (By similarity). EIF  
nd vertebrae. Required for proper anterior-posterior somite patterning. Proposed to function in

cleavage, continues to digest histones tails via its aminopeptidase activity (PubMed:28847961  
VA), which is further cleaved by the cytoplasmic Dicer ribonuclease to generate the mature miF

. Activin is also thought to have a paracrine or autocrine role in follicular development in the ov

ll activation and proliferation via its interactions with CD6 (PubMed:15048703, PubMed:163528

interaction with RNH1 in vivo.

gulation to maintain genomic stability. Regulates centrosomal microtubule nucleation. Requires repair by HR. May participate in S phase checkpoint activation. Binds selectively to ssDNA, and to promoting PIK3R1/p85 ubiquitination, which impairs its recruitment to the TCR and subsequent ac

plex mediates the import of proteins such as TIMM23, SLC25A12/ARALAR1 and SLC25A13/AF

lament capping and actin bundling activities depending on the context. Displays barbed-end ac

checkpoint-mediated arrest of cell cycle progression in response to low doses of ionizing radiation a

ers by enhancing transcription factor binding and/or bringing distant regulatory sequences into c

ively regulates myogenic transcription factor MYOD1 function by facilitating the recruitment of t  
to the immunoglobulin mu chain switch region. Preferentially binds to the 5'-GGGCT-3' motif. I

as a more potent activator of the IFN-beta (IFNB) gene than the IFN-alpha (IFNA) gene and pl  
cium sensitivity to KCNMA1. Its presence is also a requirement for internal binding of the KCN

are likely to contribute differentially to the complex helicase activity. Required for the entry in S phase.  
are likely to contribute differentially to the complex helicase activity.

are likely to contribute differentially to the complex helicase activity (By similarity). Interacts with

pterin synthase complex, a complex that catalyzes the conversion of precursor Z into molybdox

development, nodes of Ranvier are formed by the fusion of two heminodes. Required for norr

038218).

missing defects, thereby limiting or excluding their export to the cytoplasm. The RNA exosome m  
EJC assembly or during subsequent mRNA metabolism. Participates in the regulation of alterna

base of the clamp element. The RBP4-RPB7 subcomplex seems to lock the clamp via RPB7 in  
t could impair cellular functions, and by removing proteins whose functions are no longer requir  
ng its affinity for the 3'-OH end of the primer-template and stabilizes POLB to those sites where

and DNA damage checkpoint activation. Through recruitment of ATRIP activates the ATR kinase located in the cytoplasm. Variable expression of this gene in colorectal cancers compared to ac

alt sensitivity of peripheral glucose uptake, cardiac repolarization and memory consolidation. U  
ole formation and proper mitotic progression. During procentriole formation, is essential for the  
OXO1, UBP43, and probably MYC, TOB1 and TAL1. Degradation of TAL1 also requires STUB  
90923). Mediates Cl(-) flux that is not coupled to amino acid transport; this avoids the accumul  
ds, and excludes methylated, anionic, and cationic amino acids (PubMed:8702519, PubMed:29  
xular chaperone in its multimeric membrane-bound state, assisting in the folding of synaptic fus

and activated spliceosome C complexes (PubMed:11991638, PubMed:28502770, PubMed:28  
sist the organization and assembly of outer dense fibers (ODFs), a specific structure of the spe

al anchors leads to the formation of the SNARE complex, which brings membranes into close p  
' trimethylation is also required to direct DNA methylation at pericentric repeats. SUV39H1 is ta

: inducer T-cells (By similarity). TLE1, TLE2, TLE3 and TLE4 repress transactivation mediated

erefore, species-specific (PubMed:20711192). Both M.tuberculosis HSP70 (dnaK) and HSP65  
'P) and Thymopentin (TP5) may play a role in T-cell development and function. TP5 is an immu  
round the unbroken strand thus removing DNA supercoils. Finally, in the religation step, the Df

01, PubMed:15634918, PubMed:17030620, PubMed:16702957, PubMed:20702587, PubMed:2

071723, PubMed:29900004). Also able to recognize and bind crotonylated histone H3 (PubMed:12117417, PubMed:12225859, PubMed:30867591). May play a role in the transport

of inorganic phosphate, a potential physiological compound (PubMed:9607309). Through its extracellular

domain stabilizes replication forks and influences both CHEK1 phosphorylation and the intra-S phase of

the cell cycle (PubMed:129769719). Required for correct spindle formation and has a role in regulating cytokinesis and genomic

stability. A subunit of the myosin PP1 complex: phosphorylated PPP1R12A then interacts with 14-3-3, leading to recruitment of mTORC1 and mTORC2 complexes, which regulate cell growth and survival in response to nutrient

availability (PubMed:11961546, PubMed:22748924). CRLs complexes and ARIH1 collaborate in the regulation of independent cell motility by mediating deacetylation of tubulin (PubMed:12024216, PubMed:20312971). Also involved in regulating cell growth and survival in response to nutrient availability by bringing newly synthesized cbx proteins to heterochromatic DNA replication foci.

Important role in the regulation of cholesterol homeostasis, regulating cholesterol uptake through

polyunsaturated fatty acyl-CoAs as acyl donors compared to saturated fatty acyl-CoAs. Seems RNF41 is involved in the control of hematopoietic progenitor cell differentiation into myeloeryth

cytosomal protein S19 during the formation of pre-ribosomes (By similarity). 97582, PubMed:23532825). May be involved in the control of cell growth and differentiation. M:

calization to mitotic spindle, but not to centrosomes and CCNB1 localization to both mitotic spii state. Functions with MYC to activate target gene expression through RNA polymerase II pause

NA (PubMed:10219083, PubMed:10852724, PubMed:11595739, PubMed:16510448, PubMed during the G1/S transition, leading to inhibit FBXW5 ability to ubiquitinate SASS6. Its central ro 0]

'Lys-5', 'Lys-8' and 'Lys-12' (H4K5ac, H4K8ac and H4K12ac, respectively), regulating DNA rep

lation of HSPA5/BiP (PubMed:25601083). In unstressed cells, acts as an adenylyltransferase k sing factors with their substrates. Component of the cytoplasmic LSM1-LSM7 complex, which i

ssing defects, thereby limiting or excluding their export to the cytoplasm. The RNA exosome m

r disease (PubMed:17143291). Inhibits the pro-apoptotic function of KREMEN1 in a Wnt-indep

DNA damage response appears to require the association with TP53BP1 phosphorylated by A

sitioning. Specifically, SYNE2 and SUN2 assemble in arrays of transmembrane actin-associate

; ultimately affecting neuron pool and cortex size (PubMed:27737959).

ssing defects, thereby limiting or excluding their export to the cytoplasm. The RNA exosome m

, possibly by interfering with the transactivation domain of NFKB1. Induces apoptosis in breast

). Activation of IL17RA leads to induction of expression of inflammatory chemokines and cytoki

selective permeability for Na(+), Li(+) and K(+) ions, but selects against Cl(-) ions. Plays an ir

ases has been reported conflictingly.

othyronine and thyroxine.

3955). May function as sterol isomerase (PubMed:25566323). May alter the activity of some cy

mitoribosome differ greatly in sequence, and sometimes in biochemical properties, which pre

mitoribosome differ greatly in sequence, and sometimes in biochemical properties, which pre

ts into these complexes.

as a N(6)-adenine-specific DNA methyltransferase by mediating methylation of DNA on the 6th adenine. Required for decatenation of chromatin bridges at anaphase. Early in neurogenesis, and DMC1-promoted homologous pairing. May inhibit HIV-1 viral protein TAT activity and mo

3 is not required for tRNA modification (PubMed:22912744, PubMed:28805828).

3 mitoribosome differ greatly in sequence, and sometimes in biochemical properties, which pre

3 on with the MITRAC assembly intermediate containing MT-CO1/COX1, thereby participating in

ent of the CBC complex. Involved in cell cycle progression at S phase. Does not directly confer



estis. Essential for male fertility, spermiogenesis and sperm flagella formation. Plays a role in the induction of type I interferon by Epstein-Barr virus-encoded RNAs (EBERs) induce type I interferon

resulting in release of cytochrome c into the cytosol. Binding of cytochrome c to Apaf-1 triggers

apoptosis in the nucleus where it mediates KCNH2 degradation (PubMed:26363003). May modulate EGFR signaling in cerebellum embryonic development (PubMed:21623382).

regulates cell-cell junction branch migration (in vitro) (PubMed:23973328).

intra-S phase checkpoint in response to genotoxic stress.

binds to spindle pole, leading to poleward microtubule flux and poleward motion of chromosome.

recruits CENPE and PLK1 to the kinetochores (PubMed:25395579).

regulates and CEP63 centrosomal localization and promotes the centrosomal localization of CDK2 (PubMed:22020000)

Required for centriole elongation and for STIL-mediated centriole amplification (PubMed:22020000)

ably activates the Ca(2+) release-activated Ca(2+) (CRAC) channels ORAI1, ORAI2 and ORAI3, leading to promote RNA pol II backtracking to allow access to the nucleotide excision sites,

which monitors the integrity of DNA replication forks.

ity).

proteins. The formation of the ATG8-phosphatidylethanolamine conjugates is essential for autophagy.

this locus and two splice variants encoding distinct isoforms have been identified. [provided by RefSeq]

g (NHEJ) (PubMed:29042561). Required for the dynamic movement of AURKA at the centrosomes.

low desaturation degree. May participate in the production of saturated and monounsaturated

the cytoplasm via the TAP/NFX1 pathway. The TREX complex is essential for the export of K<sub>4</sub>

has been questioned (By similarity). During immunoglobulin class switching in activated B-cell

ence of the kinetochore PLK1 population until its degradation. Involved in transcriptional repress

methylation at pericentric repeats. SUV39H1 is targeted to histone H3 via its interaction with R

SNRPE, SNRPF and SNRPG are trapped in an inactive 6S pICln-Sm complex by the chaperon

SNRPE, SNRPF and SNRPG are trapped in an inactive 6S pICln-Sm complex by the chaperon

2158). Promotes apoptosis (PubMed:16046545). May act as a renal tumor suppressor (PubMe

tein phosphatase 1. May play a role in cerebellar development and synaptogenesis.

estrone-3-sulfate, dehydroepiandrosterone sulfate (DHEAS) and pregnenolone sulfate).

ion. May induce apoptosis in collaboration with APAF1 (PubMed:25716227).

-like domain-containing extracellular proteins with high affinity. Only shows kinase activity wher

lesions (PubMed:25931565).

substrates, introducing single-strand cuts in duplex DNA close to junctions with ss-DNA. Has a  
in favor of neural crest specification (PubMed:26399832).

PubMed:27185865). Also required for centriole-to-centrosome conversion during mitotic progres:

of DCAF15 by acting as a molecular glue that promotes binding between DCAF15 and weak ε

e-emptive quality control, a mechanism that selectively attenuates the translocation of newly sy

5020).

um, it is considered to be a candidate for tumor vascular targeting. [provided by RefSeq, Jan 2008]  
es. [provided by RefSeq, Jul 2008]

a unique regulator of gene expression in several different embryonic and postnatal cell lineages

actin flow (By similarity). Overexpression can recruit Ran GTPase to the nuclear periphery (PubMed:19289083). Inhibits cell growth and tumorigenicity of medulloblastoma (MDB) (PubMed:21472142). Involved in

h microtubules as oligomeric assemblies (PubMed:19289083). The complex facilitates the process in a microtubule-  
-coupled manner (PubMed:19289083). In the complex, it mediates the microtubule-stimulated c

high fat diet, palmitoyl- (C16:0-) ceramides generated by CERS6 specifically bind the mitochondria

IK signaling cascade via its interaction with FZD4 and VANGL2.

NVS may downregulate the canonical Wnt pathway and promote the Wnt-PCP pathway by regulating the Wnt-PCP pathway. It also  
play a critical role in cell-cell adhesion and recognition processes.

structural features of the tRNA body. The tRNA splicing endonuclease is also involved in mRNA processing

assembly is proposed to coexist in a dynamic equilibrium may suppress nascent cilium assembly

coordinated incisions that lead to the formation of ligatable nicked duplex products. Cleavage of  
cell migration (By similarity). In T-cells involved in endosome-to-membrane recycling of receptor

NA), which is further cleaved by the cytoplasmic Dicer ribonuclease to generate the mature miF

NA), which is further cleaved by the cytoplasmic Dicer ribonuclease to generate the mature miR and the three components separate and importin-alpha and -beta are re-exported from the nucleus.

3) complex also mediates ubiquitination and degradation of CLDN8, a tight-junction protein required for cell adhesion. May be involved in regulating spermatogenesis and in the RACGAP1 pathway in neurons.

E2-E3 ubiquitin protein ligase complexes in IL-1R and TNFR-1 pathways; affected are at least several specific tyrosine residues on the cytoplasmic tails of the receptor, creating docking sites for STATs.

synergistically enhances the affinity of the SKA1 complex for microtubules and may allow the N

importin-alpha (PubMed:26165940). At the onset of mitosis, GOLGA2 interacts with importin-a

the purine nucleotide metabolism, thereby regulating the metabolic function and bioenergetic status. (Common sequence) DNA sequence in the promoter region of interferon regulatory factor 1 and p53.

PubMed:24854087). During cell cycle progression acts through SCF-dependent proteasomal ubiquitination network to coordinate DNA replication with DNA repair and DNA damage tolerance pathways (PubMed

NA), which is further cleaved by the cytoplasmic Dicer ribonuclease to generate the mature miR

3) during prometaphase to midbody during cytokinesis and participates in the organization of the



9 (CASP9). Inhibits cleavage of CASP9-dependent substrates and downstream markers of apo

between liposomes (in vitro) and probably functions as a PA transporter across the mitochondri  
:hway.

HMGB1 secretion. The active cytokines and HMGB1 stimulate inflammatory responses. Inflamma

nsion (By similarity). As part of the BORC complex may play a role in lysosomes movement an

ondria. Seems to promote the redistribution of BIRC4 from the cytoplasm to the nucleus, proba  
ric progression (PubMed:17409436).

is to be required for Wnt-mediated inactivation of GSK-3 kinase. Both pathways seem to involv

NA), which is further cleaved by the cytoplasmic Dicer ribonuclease to generate the mature miF

am. Plays a role in the regulation of aortic epithelial cell morphology, and is required for flow-inc  
ng the second into a water molecule, with two electrons provided by NADPH via cytochrome P.

· GSK and does not inhibit GSK activity (PubMed:23621087, PubMed:23733961).

Plays an important role in the regulation of B-cell differentiation, proliferation, survival and apoptosis (PubMed:26091040). Signaling triggers an increase of cytoplasmic  $Ca^{2+}$  levels (PubMed:19656000).

Cooperates with SHTN1 to promote both the transition from the multipolar to the bipolar stage and the subsequent migration of the cell.

14070612).

oxidative stress by facilitating the SQSTM1-mediated autophagic degradation of KEAP1 (PubMed:16707096, PubMed:19204325). This inhibitory effect is selective to endothelial cells as n and motility through phosphorylation of key regulators of these processes such as CRK, CRK<sup>II</sup>. Prerequisite for the subsequent ligation of the two exon halves and the production of a mature tRNA

and regulation of AMPK activity in modulating MYC and PPARGC1A protein levels and cell growth

its role in arginine transport.

reduced production of pro-inflammatory cytokines by regulating the endosomal TLR3- TICAM1/TIRAP

toxic stresses. May negatively regulate protein translation in response to endoplasmic reticulum

RNA and antisense miRNA star (miRNA\*) products. The mature miRNA is incorporated into a RISC

degradation. This is achieved through cycles of ATP binding, ATP hydrolysis and ADP release, mediated by Dicer. The mature miRNA is incorporated into a RISC

PubMed:27906959). CDT1 degradation in response to DNA damage is necessary to ensure pr

ation. This is achieved through cycles of ATP binding, ATP hydrolysis and ADP release, medi  
sion, specifically for cytokinesis and chromosomal segregation (PubMed:26398195). Plays a ro

:G5 protein. [provided by RefSeq, Feb 2019]

o the activation of several signaling cascades. Activation of PLCG1 leads to the production of tl  
required for recovery of stalled replication forks, and directly contributes to genomic stability. In  
portant role in controlling cell cycle progression and DNA damage-induced G2 arrest (PubMed

RNA and antisense miRNA star (miRNA\*) products. The mature miRNA is incorporated into a F

men formation during renal tubulogenesis. Plays a role in cancer development and aggressive

iber differentiation (PubMed:29501879).

ting neurogenesis.

3' in promoter of target genes (PubMed:7957066, PubMed:11782474, PubMed:12533514, Pub

ds that are less well-ordered and rigid compared to nucleosomes containing histone H3 (PubM

i79). The transport of pole-proximal chromosomes towards the spindle equator is favored by m  
mitosis in transformed, abnormally dividing neonatal cardiomyocytes. Interaction with RB direc

r KDM1A and RCOR1, and thereby inhibits demethylation of histone H3 at 'Lys-4' (in vitro) (Put

asis of cerebral spinal fluid or ciliary function (By similarity). Essential for construction of the cer

RNA and antisense miRNA star (miRNA\*) products. The mature miRNA is incorporated into a F

on differentiation (By similarity).

stress: rapidly activated upon stress stimulation, such as ionizing radiation, reactive oxygen sp  
tion. Besides, required for normal hair development.

microtubules (PubMed:23085020).

RNA and antisense miRNA star (miRNA\*) products. The mature miRNA is incorporated into a F

an association between the prolyl hydroxylases and VHL enabling efficient degradation of HIF  
plex (PubMed:10734143, PubMed:19609301, PubMed:20649465, PubMed:9734359, PubMed:  
s triggers cellular activation, with generation of key proinflammatory mediators. Interaction with  
KS, which phosphorylates and activates PTK2/FAK, leading to the spread of cardiomyocytes. I

219). Involved in the regulation of inflammatory response and neuroinflammation. Via the produ

Regulates the circadian clock by inhibiting the basal and circadian expression of the core circ

T3. Dephosphorylates STK4 on 'Thr-387' leading to STK4 activation and apoptosis (PubMed:20  
s; stimulating Schwann cell proliferation; implication in the development of the myocardium suc  
pression. Recognizes two classes of DNA response elements within the promoter of its target  
provided by RefSeq, Jul 2008]

hibits telomerase and is involved in telomere length homeostasis; it is proposed to bind to newl

-induced type 1 interferon production (PubMed:23871208). Promotes host antiviral responses i

ading to their degradation by the proteasome. Conversely, phosphorylates the Rap activator R/  
cleolytic degradation by XRN1. Also acts as an important regulator of the HIF1A-mediated hyp  
cardiac precursor cell movements during gastrulation and heart morphogenesis (By similarity)

rapidly recruited to blocked forks and promotes gene conversion at blocked replication forks (P  
H3K27me3, which is required for embryonic stem cell identity and proper differentiation.

ates expression of a small subset of genes, including MTFP1 (PubMed:28500257). Regulates

18906). Mediates apoptosis by activating DAPK1. In the absence of NTN1, activates DAPK1 by

and EPAS1/HIF2A to bind to hypoxia-responsive elements (HRE) located within the enhancer/p

unwinding the short telomerase RNA/telomeric DNA hybrid that is the intermediate in the telom

-3' of the enhancer II of hepatitis B virus genes, a critical cis-element of their expression and re



/TP53. Also component of the TRIM28/KAP1-ERBB4-MDM2 complex which links growth factor

[Mar 2016]

JR77 promoting synaptic differentiation. Associates with chromatin to the ZNF16 promoter. Integrins and activates integrins ITGA5:ITGB3, ITGA4:ITGB1 and ITGA5:ITGB1 in a CXCR4-inde

ctor for polyadenylation activity (in vitro) (PubMed:21788334, PubMed:21855801). Required for

megakaryocytes and platelets and for bone marrow B-lymphopoiesis. Required for B-cell survival assays (PubMed:22132193, PubMed:25355627, PubMed:26496226). Involved in the cell cycle chec

RIPK2, RIPK3, RIPK4, CASP3, CASP7, CASP8, IKBKE, TRAF1, and BCL10. Acts as an importar

RNA and antisense miRNA star (miRNA\*) products. The mature miRNA is incorporated into a FcγR3 (endoplasmic reticulum-associated degradation) and in cell-cycle regulation; Lys-29-linked is involved in lys

6L, FBXO5/EMI1, FOXM1, KIF20A/MKLP2, CENPU, NEDD1, NINL, NPM1, NUDC, PKMYT1/ckpoint, a process required to delay abscission to prevent both premature resolution of intercellular junctions and controls bone mass (By similarity). Orchestrates the endocrine function of the

RNTL/BMAL1 localization to the cytoplasm. Plays a role in both the input and output pathways. Early embryonic development is involved in tissue-specific differentiation processes that are dependent on

signal that is required for the myosin contractile ring formation during cell cycle cytokinesis. Requires KIF1B/p27 in the nucleus and exports it to the cytoplasm for ubiquitin-dependent degradation.

i/SCF and KIT promote activation of STAT family members STAT1, STAT3 and STAT5. KITLG

or male and female meiosis.

ismitters. May play a role in vasoconstriction.

RNA and antisense miRNA star (miRNA\*) products. The mature miRNA is incorporated into a RISC complex. Positively regulates p53/TP53 and p73/TP73.

the COP1-binding domain (By similarity). Interacts with MAPK kinases and regulates activation c and for the proper attachment of spindle microtubule to the kinetochore. Necessary for kinetoc

A, with a preference for supercoiled DNA and AT-rich DNA (PubMed:10878551). Does not con

forming a link between spindle microtubule plus-ends and mitotic chromosomes to achieve faith

stream effector of CDC42 which mediates CDC42-dependent cell migration via phosphorylatic

sor activity (PubMed:11741002). Post-transcriptional inactivation of REST by SRRM4-depende in repair pathway (the NER pathway) to initiate DNA repair (PubMed:10882109, PubMed:1127

receptor complex composed of 2 TGFBR1 and 2 TGFBR2 molecules symmetrically bound to

ome is used as a substrate and when not histone octamer is used as substrate.

on of target genes such as PRM1 and TNP1 which are required for packaging and condensati tion of RAS, RAF1 and the MAP kinases MAPK1/ERK2 and/or MAPK3/ERK1. Promotes ac

ding protein (C/EBP) function and as an activator of other genes (By similarity). Acts as a domi

ubiquitination and degradation of SGK1 and TNK2. Ubiquitinates BRAT1 and this ubiquitination

its and activates the TLR2-dependent signaling pathway (PubMed:26599367). Positively regulates

mismatched uracil and thymine, in particular in U:C and T:C mismatches. Specifically binds 5-hydroxymethyl

doxorubicin (PubMed:11909979, PubMed:9873047). Plays an essential role in the control of REB1 (PubMed:24381480, Apr 2014]

miRNA and antisense miRNA star (miRNA\*) products. The mature miRNA is incorporated into a R-loop (H3K9me0), respectively, and recruits chromatin proteins. Enriched in pericentric heterochromatin

, thereby inhibiting the translation of mRNA into protein (PubMed:19736320).

cytosol.

miRNA and antisense miRNA star (miRNA\*) products. The mature miRNA is incorporated into a R-loop

the immune system, thereby facilitating tumor survival (PubMed:28813417, PubMed:28813418)

with ZFYVE9 and SMAD4 and prevent propagation of the intracellular signal (PubMed:20129061).

miRNA and antisense miRNA star (miRNA\*) products. The mature miRNA is incorporated into a R-loop

as an activator on the DR5 element (PubMed:29021580). In concert with RARG, required for skeletal muscle development and maintains euploidy.

20119, PubMed:9228017, PubMed:9716180). May play a role in the oxidative metabolism of x

30, PubMed:23696226). Upon TCR/CD3 complex stimulation, inhibits TCR-mediated cytotoxici

ALB2-scaffolded HR complex containing BRCA2 and RAD51C and which is thought to play a r

bMed:18434541). Signaling is mediated via effector proteins, such as adenylate cyclase. Inhibi

RNA and antisense miRNA star (miRNA\*) products. The mature miRNA is incorporated into a F

tributes to the down-regulation of p53/TP53 transcription.

of NF-kappaB transcriptional regulatory activity (PubMed:19684084). Involved in the regulatio

ant auto-regulatory loop. [[SirtT1 75 kDa fragment]: Catalytically inactive 75SirT1 may be involv

ice of activated regulatory T-cells (Tregs) (PubMed:19750484, PubMed:19651619). Required f

RNA and antisense miRNA star (miRNA\*) products. The mature miRNA is incorporated into a F  
phils to bind pathogens during inflammation (By similarity). Degradation of intravascular NETs l  
X chromosome in XX females. May stimulate ubiquitination of histone H2A 'Lys-119' by recruit

some amplification. Also implicated in triggering apoptosis in polyploid cells that exit aberrantly  
plex or cyclosome (APC/C) in complex with its activator CDH1 (APC/C-Cdh1). Necessary for en

o the inner centromere and for correcting defective kinetochore attachments. Involved in centro

histone H3 at H3K4 and H3K9. Isoforms 4 and 5 are probably not functional due to the deletio

H3K36me2).

A4 and GATA6 and by the neuronal bHLH factors ASCL1/MASH1 and NEUROD4/MATH3 (Pu

Multiple serine and threonine residues in unstructured domains of proteins, such as SRRM1 and of adipogenic genes. Overexpression leads to induction of smooth muscle marker genes, suggest

or and repressor regulating target genes by binding to an interferon-stimulated response element

site for 5'-splice site cleavage. The tRNA splicing endonuclease is also involved in mRNA processing

sterol efflux (PubMed:14570867). May regulate cellular ceramide homeostasis during keratinocyte

phospholipase in some circumstances, it should be noted that cardiolipin hydrolase activity is either

transition of cell growth.

0557084). A second signaling pathway involving PKC and calcium fluxes has been seen for skeletal

muscle, as PKC seems to be required for Wnt-mediated inactivation of GSK-3 kinase. Both pathways

miRNA and antisense miRNA star (miRNA\*) products. The mature miRNA is incorporated into a RISC



e GTPase-activating activity of FLCN, leading to activation of mTORC1 and subsequent cytoplasmic reorganization of the AURKB/C complex. AURKB/C directs AURKB/C toward substrates near microtubules (PubMed:15316025, PubMed:12925766). AURKB/C is involved in epithelial-mesenchymal transition (EMT) induction. Binds to multiple functional elements of the human

PITX2 P1 promoter transcription activation. Associates with chromatin to the PITX2 P1 promoter region.

Involved in transcriptional regulation via interaction with MLLT10.

Number of transcripts has not been determined. [provided by RefSeq, Jul 2008]

to repress p53/TP53-target genes. Also recognizes and binds RB1/RB monomethylated at 'Lysine' and in cardiac development, in a non-redundant way with ZFPM2/FOG2 (By similarity). Mutations in this gene cause developmental disabilities. Has broad substrate specificity with manganese or cobalt as cofactor and can act on

neonatal tissues. Seems to be an important facilitator of cell proliferation in certain populations, such as

has specificity for diacylglycerol substrates with an arachidonoyl acyl chain at the sn-2 position, with a preference for 1,3-bis(sn-3'-phosphatidyl)-sn-glycerol. Required for initial activation of CDK1 at centrosomes. Phosphorylates numerous target proteins

of pyramidal neurons in the developing cerebral cortex (PubMed:30639322).

and hydrolysis play a pivotal role in mismatch repair functions. The ATPase activity associated with this protein is required for the synthesis of prostaglandin G<sub>2</sub>-series prostaglandins and thromboxanes (PubMed:7947975, PubMed:7592599, PubMed:9264444).

mediated recombination at resected ends (PubMed:25642963). POLQ-mediated MMEJ may be required to promote

mergency circuit' that shapes feeding responses to stressful conditions (PubMed:28953886). Or  
00294, PubMed:15793005). Binds DNA (in vitro) and may play a synergistic role with STAT6 in

RNA and antisense miRNA star (miRNA\*) products. The mature miRNA is incorporated into a RISC  
complex.

pression of AP1 transcription factors (PubMed:29043977).  
mediated phagocytosis through interaction with RAB31 leading to activation of PI3K/Akt signaling.

liver by regulating the endocycle, probably by repressing genes promoting cytokinesis and anti-  
RNA and antisense miRNA star (miRNA\*) products. The mature miRNA is incorporated into a RISC  
complex (PubMed:16839880, PubMed:19713938, PubMed:23726973, PubMed:22887998, PubMed:

by NADPH via cytochrome P450 reductase (CPR; NADPH-ferrihemoprotein reductase) (PubMed:  
enhancer, T-cell receptor enhancers, LCK, IL3 and GM-CSF promoters. CBF complexes repres

logene (By similarity).

genes important for cell proliferation, cell death, and cell migration. SAV1 is required for STK3/

promotes kinesin-1 motility along microtubules and is essential for axon elongation and progenitor cell self-renewal (PubMed:23812588).

expression of BLK in the differentiation of IL17A expressing gamma-delta T-cells (By similarity). Promotes

the assembly of the core snRNP. Dissociation by the SMN complex of

the NCOR1/HDAC3 corepressor complex, enhancing transcriptional repression. Recognizes two different signaling pathways.

is recruited from the centrosomes. Regulates kinetochore microtubule attachment stability in mitosis via p

is essential for embryonic development (By similarity). Plays also a role in induced pluripotent stem cells (iPSCs) r

expression of miRNA and antisense miRNA star (miRNA\*) products. The mature miRNA is incorporated into a RISC

complex in T-cells (PubMed:17174122).

› block the KCNMA1 tetramer.

› IL4 expression and promotes alternative activation of adipose tissue macrophages, which are

nt manner. Can also promote cellular transformation through inhibition of the p16 pathway.

ivity of the BCR(KEAP1) complex, promoting nuclear accumulation of NFE2L2/NRF2, heterodi

Med:17088550). Plays a role in the regulation of DNA virus-mediated innate immune response I

os prevent tumor formation. Required for normal progress through mitosis and normal proliferat

id gapped DNA. Interacts with and stimulates DNA polymerase POLH. During DNA repair synt

r the formation of long-term memory. Regulates synaptic plasticity by promoting endocytosis of

ts anti-oncogenic effects in tumor cells through activation and down-regulation of EPHA2. Activ

, CDK7, CEBPB, CHAMP1, DMD/dystrophin, EEF1 proteins/EF-1, EZH2, KIF11/EG5, EGFR,

phosphatidate/LPA, diacylglycerol pyrophosphate/DGPP, sphingosine 1-phosphate/S1P and expression (By similarity).||[Isoform Alpha-2]: Has lower transcriptional activation activity than is

with PTK2B/PYK2 and SRC. May inhibit differentiation and activity of osteoprogenitor cells. Funct

ion. The Rab8-GTP localizes to the cilium and promotes docking and fusion of carrier vesicles to it and is involved in reprogramming vesicle trafficking upon autophagy induction. Involved in the

(PubMed:28525742). During DNA repair, PARP1 recruits PARP9/BAL1-DTX3L complex to DNA for transcriptional regulation, cell cycle progression and developmental events. Represses MEF2-1 (PubMed:353360, PubMed:29127155). Engages with a range of client protein classes via its interaction

with client sorting of BACE1 to axons implicating a function in neuronal APP processing (By similarity

with MEF2-1)6). Particularly important for the repair of UV-induced pyrimidine dimers (PubMed:10385124, F

unctions: PubMed:19915044, PubMed:9153189, PubMed:9162022). Participates in bidirectional cell-cell contact

Seems to positively regulate differentiation of chondrogenic tissue through the growth factor receptor signaling pathway. Plays an important role in controlling the migration of immune and cancer cells that

acts as a transcriptional activator. May be involved in the differentiation and/or survival of late postmitotic

monoacylglycerol (MAMAG) (PubMed:28420705).

Non-enzymatic microbial antigens are generated via non-enzymatic condensation of metabolite intermediates (e.g., acetylaldehyde).

It recruits it to the GAIT complex that binds to stem loop-containing GAIT elements in the 3'-UTR

of viral integration, together exert efficient antiretroviral effects in infected target cells. Selectively

indicated for an association with the NuRD complex) represses transcription from CCND1/cyclin D1



tion of antiviral immunological genes, including interferons (IFNs); IFN-alpha and IFN-beta. Re

ie degradative 'Lys-48'-linked ubiquitination (PubMed:22863753). Inhibits the PI3K-AKT-mTOR

ily members are coexpressed and interact with each other, and this determines the overall per

ial splicing events combined with optional post-translational modifications give a wide spectrum

ce of superoxide generation via the one-electron reduction of molecular oxygen. Also may cata

ent nucleolytic degradation past a given point (PubMed:11741547, PubMed:9590181, PubMed:

arity).

igration in an actin-, microtubule- and MAP1A-dependent manner (PubMed:20543869). Also in

tion, associates with mitochondria antiviral signaling protein (MAVS/IPS1) that activates the IKK  
deacetylation and negative regulation of beta-catenin (CTNB1) transcriptional activity (PubMe

ie response is triggered in response to non-CpG double-stranded DNA from viruses and bacter

may play an important role in gastrointestinal tract water transport and in glycerol metabolism (

ter protein 2 complex 2 (AP-2) in clathrin-coated pits (CCPs). However, the extent of beta-arre

l mapping to both the dorsal lateral geniculate nucleus (dLGN) and the superior colliculus (SC)

evention of STAT1 phosphorylation has been called into question and it has been suggested th  
y transporting it from the nucleus to cytoplasm at adhesion plaques. May play a role in myotoni  
y synergizes with IL-12 to trigger interferon-gamma/IFN-gamma production of naive CD4 T-cell  
clude retroviridae: human immunodeficiency virus type 1 (HIV-1), moloney and murine leukem

RLR or TLR3 stimulation (PubMed:27538435). In turn, activated TBK1 phosphorylates its dow

PubMed:18191611, PubMed:21620138). Promotes in a STAT1-dependent manner, the expres

PubMed:17396150). Together with PARP3, promotes the retention of the LIG4-XRCC4 complex o

e microtubule-dependent intracellular vesicular transport from early endosome to recycling end  
active form, thereby promoting neurogenesis in embryos (PubMed:22445366).

ctin ligands, thereby playing a role in inflammatory response (PubMed:10758005, PubMed:126  
699, PubMed:25279697). Required for axon guidance; via its function in O-mannosylation of a  
nesis (PubMed:22330140).

ulation. Promotes cytokine production in response to TLR4 and TLR9. Required for antibody cl

st-translational modifications such as H4 'Lys-20' methylation (H4K20me) (PubMed:19818714).

itment. Also a component of the IL-1 signaling pathway modulating IL-1-induced NFkB1 activa

ic enzymes TYR, TYRP1 and DCT/TYRP2 to melanosomes in melanocytes (By similarity).

ough ARHGEF26/SGEF and RHOG activation.

596, PubMed:16407242, PubMed:16940174). The UV-DDB complex preferentially binds to cyc

. MERTK signaling plays a role in various processes such as macrophage clearance of apoptc

surface induces dimerization and autophosphorylation of AXL. Following activation by ligand, /  
dimer combinations act as transcriptional activators or repressors, respectively. NF-kappa-B is

l:31273098).

sed intracellular Ca(2+) levels in isolated first trimester trophoblasts. Kp-10 is a paracrine/endo

inocyte migration in the epidermis (PubMed:23333244).

AB2 binding to endocytosis accessory EH domain-containing proteins such as EPS15, EPS15L

ntains an arachidonoyl group (PubMed:15544348). Also involved in the production of alkyl-lyso  
rogenitors implicating LINC complex association with SUN1/2 and probably association with cy  
; immunity. In smooth muscles, its activation by high level of Ca(2+), caused by ryanodine rece

led:27929370, PubMed:29899144). May also play a role in regulating glucose homeostasis and

minating viral replication (PubMed:10464285, PubMed:9880569). Can mediate the antiviral effect with the binding of the transcription factors HIF1A or STAT2 and the p300/CBP transcriptional machinery. Can mediate the antiviral effect via the classical RNase L-dependent pathway or an alternative pathway.

and AP1. Acts as a mediator of transrepression between nuclear receptor and either AP1 or NF- $\kappa$ B.

to couple cadherins to the actin cytoskeleton (By similarity).

and the Rab8-GTP localizes to the cilium and promotes docking and fusion of carrier vesicles to the cilium.

and alternative ACTL6B/BAF53B and DPF1/BAF45B or DPF3/BAF45C subunits in neuron-specific complex.

regulating lysosomes. The physical interaction of SPATA18/MIEAP, BNIP3 and BNIP3L/NIX at the lysosome promotes the phosphorylation and ubiquitination of SMAD3 in a cell-cycle-dependent manner and repressing its transcriptional activity.

this gene may be associated with microcornea, myopic chorioretinal atrophy, and telecanthus (PubMed:17418785). Provides succinyl-CoA to histone succinyltransferase KAT2A (PubMed:29211711).

regulated by ATF4, TRIB3 protein interacts with ATF4 and inhibits ATF4 transcription activity (By similarity). Isoform Bcl-X(S) promotes apoptosis. Potent inhibitor of cell death.

binding to polyubiquitin. Involved in leukocyte integrin activation during inflammation; this function is mediated by the interaction with the ubiquitin-proteasome system.

lates the opening of a pore in the mitochondrial double membrane in order to mediate the trans  
nnotic fluid.

their target-specific insertion into the recipient apoproteins. Cluster assembly on ISCU depends

gamma-RIIB receptor (FCGR2B), playing a central role in terminating signal transduction from  
ad cells under some circumstances. In the crosstalk between autophagy and apoptosis propos

nnotic fluid.

nce of localized and selective activation of TGF-beta-1 by LRRC33/NRROS (By similarity). Indi

as well as in response to viral agents (PubMed:28045099). Exhibits bactericidal activity (PubMe

important role in angiogenesis and blood vessel development. Involved in fibrotic processes, il

s are present in high endothelial cells (HEVs) and play a central role in lymphocyte homing at s

progression, apoptosis, or DNA damage repair.

l by altering the TGF-mediated chemotaxis of monocytes. This effect on wound healing appear  
intestinal motility. Implicated in the regulation of endothelial as well as vascular permeability, p

neurotransmission (PubMed:11907044, PubMed:12888553, PubMed:12713657). Acts as an a

chains, which in turn are catalysts in the autophosphorylation of the MAP3K7/TAK1 complex (i

: CLOCK-ARNTL/BMAL1|ARNTL2/BMAL2 heterodimer by competing for the binding to E-box elements (PubMed:11799477, PubMed:18551513). Required for osteoblastogenesis and bone formation (PubMed:11812992). Involved in platelet activation (PubMed:11812992). Involved in T-cell and neutrophil transmigration (PubMed:11812992). Involved in platelet activation (PubMed:11812992). Involved in phosphorylating SMAD3 in a cell-cycle-dependent manner and repressing its transcriptional activity (PubMed:11812992).

Promotes inclusion of the non-muscle (NM) exon in actinin pre-mRNAs. Promotes inclusion of exon 21 and exon 22 in CD44 pre-mRNAs (PubMed:15901763). In vitro regulates CD44 alternative splicing by direct binding to purine-rich exons (PubMed:15901763).

Together with TRIM21, together exert efficient antiretroviral effects in infected target cells. Selectively inhibits HIV-1 integration (PubMed:20197547).

Inhibits the conformational rearrangement of TAP induced by peptide binding. Inhibits the nuclear translocation of NF- $\kappa$ B (PubMed:15901763).

Inhibits mTORC1 activation mediated by the Ragulator complex and the Rag GTPases. Activated mTORC1 up-regulates SREBP1c (PubMed:24912431).

Plays a role in regulation of cell migration, e.g. during wound healing (PubMed:24912431).

No fully functional isoforms have been found for this gene.[provided by RefSeq, Oct 2010]



, modulates cell morphology and integrin-dependent cell adhesion through regulation of the Ration domains oriented toward the cytosolic face of the membrane. In response to ER stress, traferation (PubMed:20812024).

biquitin-protein ligase complex.

CD3G, CD3D, CD3E and CD247 enabling the recruitment of ZAP70. In turn, ZAP70 phosphor

acts also as a potent intracellular inhibitor of GZMH by directly blocking its proteolytic activity (Pu

Monoubiquitinates IKBKB that will negatively regulates Tax-induced NF-kappa-B signaling. Ne

ect protein-protein interaction. Interacts with p53/TP53 and promotes cell-cycle arrest over apc

sh positively regulate transcription (PubMed:14966270). This complex may be required for the efore indicative of a certain type of epithelial 'stem cells'. Acts as a promoter of epithelial prolifer

zation of alpha-4:beta-2-containing nAChRs and slowing recovery from desensitization. Promo

xyacyl-CoA, but with opposite chiral specificity (PubMed:15060085). Regulates the amount of promoters of various acute-phase protein genes (PubMed:12359225). Activated by IL31 through the endosome and mostly are delivered to lysosomes enabling degradation of membrane protein

ion in renal tubular epithelial cells (RTECs). May be involved in dendritic cell (DC) maturation, tural axons/growth cones in vitro (By similarity). May play a role in constraining the orientation c

growth (Probable).

Part of the complex F(1) domain and of the central stalk which is part of the complex rotary ele

RNA and antisense miRNA star (miRNA\*) products. The mature miRNA is incorporated into a F  
resized proteins into the endoplasmic reticulum and reroutes them to the cytosol for proteasom

s its N-terminal domain, maybe through a neuronal-specific cofactor. Ativates BCL2 expression  
rning that preceeds resumption of meiosis, oocyte survival and normal zygotic genome activati

otein. [provided by RefSeq, Jul 2008]

RNA and antisense miRNA star (miRNA\*) products. The mature miRNA is incorporated into a F  
cytoplasmic DICER to generate mature miRNAs (PubMed:26027739, PubMed:26748718). The

air (NER) synthesis following UV irradiation (PubMed:20227374).

ription start site of genes and has been linked to activation of nuclear hormone receptors; SIRT

1 a stem/progenitor to a postmitotic chromatin remodeling mechanism occurs as neurons exit tl

300 to the sites of RNA polymerase II-blocking lesions (PubMed:16916636). Plays an important

role in the signaling pathway of epidermal growth factor receptor (EGFR) on dual threonine residues, which leads to the suppression of epidermal g

rowth factor receptor (EGFR) on dual threonine residues, which leads to the suppression of epidermal g

rowth factor receptor (EGFR) on dual threonine residues, which leads to the suppression of epidermal g

rowth factor receptor (EGFR) on dual threonine residues, which leads to the suppression of epidermal g

rowth factor receptor (EGFR) on dual threonine residues, which leads to the suppression of epidermal g

rowth factor receptor (EGFR) on dual threonine residues, which leads to the suppression of epidermal g

rowth factor receptor (EGFR) on dual threonine residues, which leads to the suppression of epidermal g

in embryonic development (By similarity). Involved in sexual development, acting as activator of

induction of a set of translationally active cytokine-induced inflammation-related mRNAs, such as

It supercoils DNA, and plays an important role in kinetochore assembly. CENPT has a fundamental role in the regulation of miRNA and antisense miRNA star (miRNA\*) products. The mature miRNA is incorporated into a RISC

complex by PP2A phosphatase with the PPP2R5B-AKT1 complex leading to dephosphorylation of CENPT. CENPT has a fundamental role in the regulation of miRNA and antisense miRNA star (miRNA\*) products. The mature miRNA is incorporated into a RISC

complex. In mice, it is more abundant in embryonic stem cells and plays a major role in forming H3K27me3. Also plays a key role in deuterosome-mediated centriole amplification in multiciliated cells that can generate multiple flagella. CENPT has a fundamental role in the regulation of miRNA and antisense miRNA star (miRNA\*) products. The mature miRNA is incorporated into a RISC

complex. Increases TNF-alpha production in response to LPS. Seems to be involved in the induction of inflammation in adipose tissue. CENPT has a fundamental role in the regulation of miRNA and antisense miRNA star (miRNA\*) products. The mature miRNA is incorporated into a RISC

complex and in regulating mitochondrial fatty acid oxidation (By similarity). Plays an important role in bone development and in regulating mitochondrial fatty acid oxidation (By similarity). Plays an important role in bone development

remodeling. Acts as a docking site for several chromatin remodeling enzymes (e.g. PML at the

cytochrome c oxidase is the component of the respiratory chain that catalyzes the reduction of oxygen to water

major components: the central clock, residing in the suprachiasmatic nucleus (SCN) of the brain, and

which are activated through phosphorylation and further phosphorylate additional targets. Plays a role

major components: the central clock, residing in the suprachiasmatic nucleus (SCN) of the brain, and

is weak and could be very weak (PubMed:28516954). May play a role in the promotion of late stage

5'-3' RNA consensus sequence.

involved in transcriptional regulation by KLF4. Isoform 3 and isoform 4 can bind to a EPHA8 promoter

(PubMed:29917077). ATP5MD is a minor subunit of the mitochondrial membrane ATP synthase

DPN (PubMed:18215137). After ligand activation, signals via sequential activation of SRC and RNA and antisense miRNA star (miRNA\*) products. The mature miRNA is incorporated into a F

ed in T-cell proliferation and effector function. In dendritic cells involved in endosome-to-membr

ed:10773016, PubMed:10075644, PubMed:9872744, PubMed:24305054). Signaling inhibits ac

RNA and antisense miRNA star (miRNA\*) products. The mature miRNA is incorporated into a F

ition of phospholipids (phospholipase A2 activity) (PubMed:7794891, PubMed:8619991, PubM

h a minimum acyl chain length of 14 carbons (By similarity). Does not transport docosahexaen

ectly involved in protein transport from the Golgi apparatus to the plasma membrane (By simil

or components: the central clock, residing in the suprachiasmatic nucleus (SCN) of the brain, a

aling (By similarity). The cilium length response creates a negative feedback loop whereby flui

fusion in mature osteoclasts (By similarity). Regulates insulin sensitivity through calcium/calmo  
cells. Plays important roles in mediating Src family kinase signals for the completion of cytokine

o thought to regulate the transcriptional activity of other receptors, such as androgen, progester

3-stranded tail length of approximately 15 nt (flap substrates) or 10 nt length single-stranded ga



g with the interaction of STIL with CENPJ (PubMed:25385835). Plays a role in the regulation o

Part of the complex F(1) domain and of the central stalk which is part of the complex rotary ele

matin DNA via its DACHbox-N domain (By similarity).

RNA and antisense miRNA star (miRNA\*) products. The mature miRNA is incorporated into a F

ound form, thereby promoting autophagosome maturation (PubMed:27103069). The C9orf72-  
sis and differentiate into neurons, npBAF complexes which contain ACTL6A/BAF53A and PHF

ppase-mediated translocation of phosphatidylethanolamine (PE) at the plasma membrane. Act

RNA and antisense miRNA star (miRNA\*) products. The mature miRNA is incorporated into a F

RNA and antisense miRNA star (miRNA\*) products. The mature miRNA is incorporated into a F

RNA and antisense miRNA star (miRNA\*) products. The mature miRNA is incorporated into a F

7, PubMed:19111657, PubMed:19589784). May contribute to ubiquitination and degradation of

ing to its transcription start site. May play a role in ocular development and astrocyte function (B

tal and neurogenetic diseases such as microcephaly, macrocephaly, autism, schizophrenia, cc  
d:14559847, PubMed:12865317, PubMed:15805301, PubMed:15041462, PubMed:18577768,

RNA and antisense miRNA star (miRNA\*) products. The mature miRNA is incorporated into a F

c trauma.

of calcium pumps and may regulate sarcoplasmic reticulum calcium uptake in myocytes. May e  
nt role in the regulation of DNA replication by stabilizing the licensing factor CDT1 (PubMed:27

ication licensing (PubMed:20129055). Inhibits the transcriptional activity of a subset of Hox pro

RNA and antisense miRNA star (miRNA\*) products. The mature miRNA is incorporated into a F  
ence PLP > PNP > PMP (PubMed:14522954).

of ADR1B. Also regulates AMPA-type glutamate receptor (AMPA) immobilization at postsynaptic sites.

neurite outgrowth and morphogenesis and may be involved in the early development of diencephalic subdivisions.

miRNA and antisense miRNA star (miRNA\*) products. The mature miRNA is incorporated into a RISC complex.

as the sulfane donor (PubMed:24981631).

shelterin complex (telosome) components.

is involved in N-glycosylation of APP (amyloid-beta precursor protein). Can modulate gamma-secretase and antisense miRNA star (miRNA\*) products. The mature miRNA is incorporated into a RISC complex and antisense miRNA star (miRNA\*) products. The mature miRNA is incorporated into a RISC complex

also acts as a regulator of autophagy: following cellular senescence, able to induce autophagy.

which leads to release of the repressor complex. At the same time, there is increased recruitment of

Notch (PubMed:29856954). Enhances Notch signaling pathway in a non-cell-autonomous manner and mitochondrial membrane potential and mitochondrial respiration (PubMed:20453889). Upon INS

.TRPV1 complex.

onia to efficiently accomplish the meiotic prophase.

bMed:20176812). Positively regulates transcription of RRP1B (PubMed:20040599).

ACNA1B as pore-forming subunit (PubMed:8107964).

ws them to respond to BMP4 in a paracrine and/or autocrine fashion. BMP4 signaling in the m

xidase is the component of the respiratory chain that catalyzes the reduction of oxygen to wate

ous tissues has been associated with the proliferation and metastasis of tumor cells. [provided

mination of bound antigens (PubMed:20176268, PubMed:22158414). The antigen binding site

ectal, entorhino-hippocampal and hippocamposeptal pathways. Together with EFNA5 plays als  
ces. May play a role in regulation of protein translation by phosphorylating EEF1A1, leading to  
poptotic activities of BCL2L11 by sequestering it to microtubules. Upon apoptotic stimuli the BC

rol on nascent APOE-containing lipoproteins secreted from glia and influences cerebral spinal

PubMed:14593112). May be involved in apoptosis (PubMed:14593112).

e differentiation; P-TEFB complex interacts with MYOD1; this tripartite complex promotes the t  
s, nick, or gap flaps of distinct sequences and lengths; and DNA ligase I (LIG1) on long-patch b

velopment and regulates, for instance, lymphoblast proliferation (PubMed:23178126).

in the immunological synapse and directly inhibits T-cell activation (By similarity). May inhibit a

d oxalate. Functions in multiple exchange modes involving pairs of these anions, which include

ptor tyrosine kinase including EPHA4, EPHA3 and EPHB4. Together with EPHB4 plays a centi

ALS3 by inhibiting NFKB1 (By similarity).

RNA and antisense miRNA star (miRNA\*) products. The mature miRNA is incorporated into a F

the GDP-bound to the GTP-bound form (PubMed:7479768). Functions as an important negati

kines secretion (By similarity). Enhances CD4+ T-cell differentiation and proliferation (PubMed  
rane components. Clathrin-associated adaptor protein (AP) complexes which can bind directly  
ie cleavage of peptides bound to major histocompatibility complex class II molecules of antiger

acrophage activation and polyamine metabolism (By similarity). In fetal dendritic cells may play

kidney, and therefore may provide immediate immunological protection against reactivating infi  
eton and cell motility. Plays a critical role in TNF-induced angiogenesis, and implicated in the s  
evidently of heterodimerization with survival-promoting BCL2 and BCL2L1 through induction of  
containing mRNAs, and hence promotes ARE-mediated mRNA deadenylation and decay proce

ed in Schwann cell migration during peripheral nerve regeneration (By similarity).



ner (PubMed:17287217). Recruits CTNNB1 to caveolar membranes and may regulate CTNNB

m for signal transduction by assembling, via its cytoplasmic domain, protein complexes contain  
les to MHC class II takes place. Serves as cell surface receptor for the cytokine MIF.

isity.

lar lumen (By similarity). These effects are mediated by recruitment and activation of the Par p

ston, regulates formation of membrane ruffles, cell adhesion and cell migration. Plays a role in l

homeostasis and repair. Upon epithelial CXADR-binding, JAML induces downstream cell sign  
/nt signaling (PubMed:20227366). Inhibits HDAC6 and thereby promotes acetylation of alpha-t  
f smooth muscle myosin phosphatase (SMPP1M) via phosphorylation of PPP1R12A; the inhib  
f the genome. Together with RELA, acts as a coactivator to enhance NF-kappa-B-mediated tra

s in fibroblasts; acts as a negative regulator of the RhoA activation pathway. In platelets, functi  
ralateral inner ear efferent growth cones at the midline and of retinal ganglion cell axons to the

ally with TLR4 and probably TLR2 in inflammatory responses and modulates TLR3 signaling. (PubMed:24371721). Degrade also gelatin, heat-denatured type I collagen, but not native colla

may function as a decoy receptor for VEGFC and/or VEGFD and play an important role as a ne CTNND1 (delta-catenin). Regulates cytoskeletal remodeling by phosphorylating several protei

plays a role in various processes such as endothelial cell survival during acidification by prever

a local cysteine supply and contributes to maintain intracellular GSH level. It is part of the cell (PubMed:23238346). Contributes to the generation of inhibitory postsynaptic currents (PubMed:2

pendent Rho signaling also regulates protein phosphatase 2A activation causing dephosphory

estin-1/ARRB1. Phosphorylation of ARRB1 by GRK5 inhibits G-protein independent MAPK1/M ters: acts by inhibiting the activity of the ubiquitin-conjugating enzyme UBE2N/Ubc13, leading to

nal programs. Its differential recruitment to chromatin is dependent on distribution of histone H:

2 and this binding is essential for IGF2 signaling (PubMed:28873464).

shifts to more positive voltages. The inward rectification is mainly due to the blockage of outwa

similarity). Ligand for P4HB; the interaction retains P4HB at the cell surface of Th2 T-helper cel

thylated TAF10, a member of the transcription factor IID (TFIID) complex, which induces relea

orm the predominate functional GAG-binding site.||Lactoferroxins A, B and C have opioid antag

it PIK3R1, PLCG1, SRC, GRB2, STAT3 or the adapter GAB1. Recruitment of these downstrea

s and confers resistance to transcriptional repressors (PubMed:25417107, PubMed:27105114,

components: the central clock, residing in the suprachiasmatic nucleus (SCN) of the brain, an

mediate the antiviral effect via the classical RNase L-dependent pathway or an alternative antivir

polymerization and cell migration. Additionally, phosphorylates TNNI3/troponin I to modulate c  
a) of the C-terminal glycine of the peptidylglycine substrate (PubMed:12699694). The second s  
th and invasion of malignant melanoma cells (e.g. pseudomyxoma peritonei (PMP) cell line) (P  
ilic interaction with CD177 plays a role in transendothelial migration of neutrophils (PubMed:17  
or both. In cooperation with ABCB4 may be involved in establishing integrity of the canalicular  
632, PubMed:18162525). Inhibits the cleavage of MEPE by CTSB/cathepsin B thus preventing  
arebroside and phosphatidyl ethanolamine (PubMed:9132017). Plays an important role in HDL  
products that are not contiguous in the parental protein (PubMed:27049119). Acts as a major c  
ylation of insulin receptor (IR) and insulin receptor substrate 1 (IRS-1), phosphorylation of prote  
t of the pituitary gland and the olfactory bulb. Functions as tyrosine phosphatase (PubMed:852  
required for anchorage-independent proliferation of transformed cells (PubMed:19306925). Dur  
scavenging extracellular LPL. Probably required in adipocytes for the formation of specialized  
chemotactic factor that attracts lymphocytes and, slightly, neutrophils, but not monocytes (Pub  
notactic for T-cells and monocytes and not for neutrophils. The membrane-bound form promote  
ent transcription.  
with cone collapse in response to NGF (PubMed:22155786).  
s during inflammation (By similarity). Plays a redundant role with SOX4 and SOX11 in cell surv  
specific role of each SRC kinase is very difficult. SRC appears to be one of the primary kinase:

IP6. Plays a role in cytokinesis through KIF14 interaction (By similarity).

logy and autophagy (PubMed:31036939).

ponse to LTBR stimulation. Inhibits TRAF2-mediated activation of NF-kappa-B. Down-regulates

ane microdomains that mediate membrane trafficking and signal transduction. They are implic

tiation.

May play a role in TFRC-mediated iron uptake (PubMed:20188707). In concert with FAM89B/L

complexes and subsequently prevents premature joining of the 40S and 60S ribosomal subun

ML bodies in the nucleus (PubMed:24128730, PubMed:20168092). May regulate the activation

CNS) (By similarity). May play a role in the formation of typhoid toxin transport intermediates during

upling of PTPN12 to CD2. Also has a role in innate immunity and the inflammatory response. F

conversion probably implicating MON1A/B, and via binding SNAREs and SNARE complexes to

servicing the epigenetic landscape (PubMed:28402439). Required for chromatin targeting and substrate specificity may be influenced by its subcellular location. Sulfates GlcNAc residues at the

activation by PPP3CA (PubMed:18218901).

nerve terminals. May function as a regulator of vesicle transport, through interactions with the

ation (By similarity).

IKBKG or TRAF6 in response to interleukin-1-beta (IL1B) stimulation or upon DNA damage (PubMed:11111111).

mediates cell signaling pathways involved in cellular functions such as cell adhesion and migration

VALP-2), soluble tuberculosis factor (STF), phenol-soluble modulin (PSM) and B.burgdorferi or

of endomembrane damage.

gging RHOA activation leading to cell migration increase and invasiveness (PubMed:1704696)  
uclear export. Positively regulates the association of constitutive transport element (CTE)-conta

imer-mediated transcriptional activation of the core clock component PER2 (By similarity).

ylglycerol (By similarity).

olomeric DNA, but not to a telomerase RNA template component (TER) (PubMed:12676087, P

developing brain (By similarity). Plays a role in RHOA activation and subsequent changes of tl  
ement membrane during embryogenesis, and for normal embryonic epicardium and heart morp

nscription to occur, blocking early-stage virus replication in dendritic and other myeloid cells (P  
unction does not rely on its G-protein coupled receptor (GPCR) structure but instead on its com

on (PubMed:18270267). Binds to phosphoinositides with preference for PI(3,4)P2 and PI(3,4,5  
to autophagosomes and delivered to lysosomes for degradation (PubMed:20505359, PubMed:



caspase activation and degeneration of both neuronal cell bodies (via caspase-3) and axons (major constituent of the ASC pyroptosome which forms upon potassium depletion and rapidly re-enters the nucleoplasm where it can inhibit MDM2 and allow p53/TP53 activation (PubMed:24120868, HIF1A activity. May regulate insulin signaling cascade. May play a role in apoptosis, bone resorption

and osteoclast formation. When bound to PKB, it inhibits it probably by decreasing PKB level of phosphorylation

and is recruited to the plasma membrane by WASL, and thereby plays a role in the reorganization of the F-actin cytoskeleton. Binds to

and may sensitize epithelial cells to apoptosis specifically triggered by the death ligand TRAIL. May have a role in

regulating the epsilon-cleavage of APP CTF-alpha, leading to a low production of AICD.

is expressed in fibroblasts and thymocytes, but not in hepatocytes (By similarity). Required for mTORC1-mediated signaling to escape degradation resulting in their translocation to the nucleus, heterodimerization with h

the stability of CDKN1A transcripts induced by p53/TP53. Also acts as a mRNA splicing factor

proliferation, migration and sprouting of primary brain microvascular endothelial cells (MVECs). Also

recruited to the endoplasmic reticulum-plasma membrane contact sites (EPCS) which is mediated

by increasing the catalytic turnover without increasing the affinity of deubiquitinating enzyme

phosphorylate p-sinosamines and ribulosamines (PubMed:14633848).

n. Enhances the inhibitory activity of SMAD7 and reduces the transcriptional activity of SMAD2

Compromised BTB dimers is required for the differentiation and survival of neural crest and neuro

phosphorylation of MFN2 (PubMed:23620051). Activates PRKN in 2 steps: (1) by mediating pho

clearance of the protein from the cell surface by clathrin-dependent endocytosis. WNK4 appea

by similarity).

lear import (PubMed:19015240, PubMed:26609676).|[Isoform 2]: Functions as transcription re

ly (PB) in response to stress (PubMed:21964062).

shown to enhance the induction of cytotoxic T-cells and selectively stimulates interferon gamma  
transcription factor that specifically activates the expression of the CD40 receptor and its ligan  
(79411).

exclusion of PIAS3 from the nucleus (PubMed:20516148).

e reticulophagy receptor TEX264, participates in the remodeling of subdomains of the endopla  
possibly regulating CCDC88B-mediated lytic granule transport to MTOC during cell killing (Publ

724).

AURKA removal from centrosomes in prophase (PubMed:23649807). Also, regulates spindle

cell activation. CD47 binding prevents maturation of immature dendritic cells and inhibits cytoki

itol 3,4,5-trisphosphate (PubMed:30420721, PubMed:28882892). Plays an important role in Ml

ion of ERK, JNK and NF-kappa-B pathways, inhibiting MAP3K3-mediated interleukin-8 produc

:16940153, PubMed:18945876, PubMed:20207939, PubMed:20089856). Saturated long-chain

at plays a central role in the formation and the maintenance of the neuromuscular junction (NM,

n of WASF3 is critical for the stimulation of lamellipodia formation and cell migration. Involved in  
n mediated by the nuclear hormone receptors PPARG and RARA (PubMed:22351778).

tion and activation of the energy sensor protein kinase AMPK (PubMed:24767988, PubMed:26  
be related to the absence of a catalytically active form of the mitochondrial isozyme. The incre

milarity). May be involved in the regulation of MYC activity and the control cell proliferation (Put

3Bs). Its ability to specifically bind modified histones and chromatin modifying enzymes such as

and phosphorylation. Interaction with overexpressed HADH2 leads to oxidative stress and neuro

mes, and leading to HIF1A hydroxylation and subsequent proteasomal degradation (PubMed:2

on-independent deposition of histone H3.3 in pericentric DNA repeats outside S-phase and telc

the survival and differentiation of selected neuronal populations of the peripheral and central r

an important role in targeting the monocarboxylate transporters SLC16A1, SLC16A3, SLC16A8,

deficiency virus type 2 (HIV-2), simian immunodeficiency viruses (SIVs), equine infectious anen

and GM-CSF promoters (Probable). Essential for the development of normal hematopoiesis (Pu

on. May prevent premature elimination of red blood cells. May be involved in membrane perme

d the subventricular zone of the lateral ventricles. Required during thymocyte development. Pre

ner by preventing the activation of cyclin B1/CDC2 complexes. Binds to BCL6 and down-regu

y other chaperones, such as HSPA8/HSC70 (PubMed:11123922). Does not refold proteins by

ot to bind to F-actin when assembled in the complex suggesting a different linkage between ac

NA replication checkpoint independently of Okazaki fragments processing. Possesses different

' be involved in the promotion of lymphatic endothelial cells adhesion, migration and tube forma

in a cell type-specific manner. The corepressing function towards thyroid hormone receptor be

ts flaps from equilibrating into structures that lead to duplications and deletions. Also possesses  
ing molecules diacylglycerol and inositol 1,4,5-trisphosphate. Phosphorylation of FRS2 triggers

tion of endothelial cells, proliferation of some types of cancer cells, but does not promote prolife



IL7, CCL11, CCL13, CCL14, CCL17, CXCL5, CXCL6, IL8/CXCL8, CXCL11, GRO, RANTES, M

functions as a recycling molecular chaperone which facilitates the secretions of tropoelastin and

lysosomal enzymes (PubMed:28453791, PubMed:28541286). Facilitates also the acidification of

and regulate the development of insulin resistance by regulating activation of transcription factors. Regu

luciferase (Luc) reporter gene expression in the presence of NF- $\kappa$ B-binding complexes and for activation of immunoglobulin heavy-chain transcription upon B-ly

phosphatase complex composed of two proteins, the trifunctional enzyme subunit alpha/HADHA described by

one of two proteins, the trifunctional enzyme subunit alpha/HADHA carries the 2,3-enoyl-CoA hydratase

activity from the complex and CREBBP is recruited, which facilitates transcriptional activation. Deac

tivator element (HRE) of target gene promoters (By similarity). Activation requires recruitment of transcri

ptase (PubMed:30530481, PubMed:19177349, PubMed:24395804, PubMed:26758806). A number of HLA

class II alleles (HLA-DQ2 and HLA-DQ8) present to CD8-positive T cells viral epitopes derived from EBV/HHV

As and long non-coding RNAs (lncRNAs) via a mechanism named 'm(6)A-switch', facilitating b

regulates the release of 5-hydroxytryptamine, dopamine and acetylcholine in the brain, and ther

apeutic kinase E-box enhancer. Regulates the circadian clock by repressing the transcriptional acti

ve IFN $\beta$ 1 receptor by itself and activate a signaling cascade that does not involve activation of

RC2 complex and inhibits trimethylation of 'Lys-27' of histone H3 (H3K27me3) by the PRC2 co  
omodimer has very low potassium channel activity, when expressed in heterologous systems, &

MK1 on a threonine residue located in its activation loop (PubMed:10436159). LIMK1 subsequ

PubMed:10395745, PubMed:22614033, PubMed:30140003). Via its role in the biosynthesis of

repair, tumor invasion, inflammation, and atherosclerotic plaque rupture. As well as degrading

ears to be involved in a very early step of clathrin-mediated endocytosis in polarized epithelial

kappa-B sites that they can bind with distinguishable affinity and specificity. Different dimer cor  
regulates RANKL-induced osteoclast differentiation (PubMed:29149593). Positively regulates

I migration and tumor cell invasion. Promotes fibroblast migration and proliferation, and thereby

erase but not acetylcholinesterase. Seems to be mediated by a specific receptor (By similarity)

irus-1 (HHV-1) replication by sequestering the viral E3 ubiquitin-protein ligase ICP0 in the cytoplasm.

clock information to metabolic pathways regulated by PER2.

Following mitochondrial depolarization, dephosphorylates DNM1L inducing DNM1L translocation to the nucleus (By similarity). The primase subunit of the polymerase alpha complex initiates DNA synthesis probably by indirectly activating myosin. Beta non-catalytic subunit acts as a scaffold on which it

phosphorylates and activates RAF1, which mediates the activation of the MAPK/ERK signaling cascade.

side chains (By similarity).

[Seq, Mar 2010]

family members. This activity requires the integrity of the catalytic site, although it is unclear whether it hydrolyzes galactose-6-phosphate sulfate by arylsulfatase A (EC 3.1.6.8), GM1 gangliosides by beta-galactosidase, or phosphatidylcholine from the plasma membrane to cytosol and is involved in calcium homeostasis (PubMed:16959576). Is a regulator

of inositol 3-phosphate and inositol 1,3,4,5-tetrakisphosphate with order of substrate preference

and placenta development. Required for embryonic angiogenesis, normal cardiomyocyte migration

1 (PubMed:19615464). Shows N-acyltransferase activity, catalyzing the calcium-independent tr  
generation of ssDNA. Component of the BRCA1-RBBP8 complex that regulates CHEK1 activa

entiation of 4 of the 5 islet cell types during endocrine pancreas development, with the exceptio

histone H3 at 'Ser-10', which results in the subsequent transcriptional activation of several imm

ne and tryptophan (PubMed:9751058, PubMed:11557028, PubMed:11311135, PubMed:11564  
ismic Ca(2+) levels rapidly return to baseline. Required for normal embryonic heart developme

plex (nBAF complex). During neural development a switch from a stem/progenitor to a postmil

(ISRE) to activate the transcription of IFN-stimulated genes (ISG), which drive the cell in an ar  
amine (PubMed:7779757, PubMed:11006110).

ted intermediate fragment called Notch extracellular truncation (NEXT) (PubMed:24226769). P

receptor complex composed of 2 TGFBR1 and 2 TGFBR2 molecules symmetrically bound to t  
ulation of cell migration by targeting CDC42BPB to the leading edge of migrating cells (PubMex

PubMed:12524540). However, this activity is inhibited when the interaction with PPP1R13B/ASI

factor recruitment, or activation or repression by disruption of binding sites or conformational D  
mplicated in the regulation of a large spectrum signaling pathway (PubMed:16352599, PubMec  
otor-associated protein (RAP). Binds dimers of beta 2-glycoprotein I and may be involved in the

PubMed:11825900). Modulates the functional properties of KCNA5 (By similarity). Enhances KC  
I viral entry. Also implicated in cell adhesion and control of cell growth and migration. Plays a ke

igh dephosphorylation of these bioactive lipid mediators produces new bioactive compounds ar  
hondrial RNA and processing of non-coding RNA imported from the cytosol into mitochondria (

i (PubMed:19759537, PubMed:21478859). Also mediates PARsylation of BLZF1 and CASC3,

1. May play a role in cartilage remodeling. May be proteolytically processed, during sperm epi

promotes neuronal migration and activates the RhoA pathway by coupling to GNA13 and possibly GNA12.

binds to APP cleavage sites.

In conjunction with the ESCRT machinery also appears to function in topologically equivalent membrane remodeling (By similarity). The NCOR1-HDAC3 complex regulates the circadian expression of the core circadian clock gene transcription. Does not activate SRF:MKL1/MRTF-A through RhoA (PubMed:11359771).

Its binding to ligand-activated beta-1 adrenergic receptor ADRB1 leads to the activation of RhoA (PubMed:11359771).

Expresses critical genes for neural stem cell fate such as SOX2, EOMES and ROBO2 (By similarity).

Involved in downstream signaling pathways (PubMed:10769033, PubMed:12221124). Plays a role as a transcription factor.

Regulates the expression of ESR1 in breast cancer. Serves as a corepressor of RARA and causes repression of RARA target genes.

filaments. Phosphorylates LIMK1, a kinase that also inhibits the activity of cofilin. Phosphorylat

similarity).

iated viral entry and VSV G protein-mediated viral entry. Induces cell cycle arrest and mediates

al activation of CREB1 (By similarity). May play a role in neurite growth. Isoform 3 may promote  
s in the relocalization of mTORC1 to the lysosomes and its subsequent activation by the GTPa  
heart rate (By similarity).

tivation stimulated by APP C-terminal intracellular fragment (AICD), most probably by competin

ivity is regulated by RAC1. Regulator of epithelial morphogenesis. As component of the WAVE matoproteasome, a form of the proteasome specifically found in testis: binds to acetylated hist

he GAIT complex interacts with m7G cap-bound eIF4G at or near the eIF3-binding site and blo of TMCC1, leading to recruitment of the endoplasmic reticulum to endosome tubules for fission and for cytokinesis (PubMed:15800069). Plays a role in epithelial cell junctions formation (PubM

ole arrest in G(0) (PubMed:22020328, PubMed:22323446). SCF(FBXL2) also mediates PIK3R:

so binds dimethylated at 'Lys-36' (H3K36me2). Isoform 1 and isoform 2 inhibit transcription from ie (RPS6KB1 or RPS6KB2) (PubMed:18498745). The Cul7-RING(FBXW8) complex also medi:



ycle commitment (PubMed:29875408). As APC inhibitor, prevents the degradation of APC sub

CTPBP1 is not essential (By similarity). Plays an important role in the specification and differer

plex (PubMed:27602518). Involved in random X inactivation mediated by Xist RNA: acts by bin

ment to TNFR1 (PubMed:25681446). Prevents also the activation of NF-kappa-B by associatir

suppress loss of contact inhibition elicited by activated oncogenes such as MYC (PubMed:15C

o the 43S PIC and scanning of the mRNA for AUG recognition. The eIF-3 complex is also requ  
ton; probably by indirectly activating myosin. Gamma non-catalytic subunit mediates binding to

MYO5B to NPC1L1, and thus facilitates cholesterol uptake (By similarity).

led:23303788). Binds preferentially to DNA containing cytidine-phosphate-guanosine (CpG) dir

æoblastogenesis in mesenchymal stem cells (MSCs). Negative regulator of the canonical Wnt/b

which together ensure the dynamics and stability of the telomere.

involved in the regulation of blood pressure through the inactivation of angiotensin II and/or the

ate target genes involved in formation of various organs, including muscle, kidney, gonad, gang  
uclear export is thought to be conferred by an asymmetric distribution of the GTP- and GDP-bou

of mammalian cell membranes (Probable). Globotriaosylceramide/globoside Gb3Cer in blood a  
ortant for regulation of endometrium cell proliferation. Important for normal prenatal and perinat

e CLNS1A that controls the assembly of the core snRNP. Dissociation by the SMN complex of

255466). Acts as 3'-5' exodeoxyribonuclease for double-strand breaks resection and efficient h

viral RNA. Can also limit the replication of hepatitis C virus (HCV), West Nile virus (WNV), Chil

cytoplasmic domain of cargo proteins predominantly via VPS35; however, these interactions seen in regulation of neurite outgrowth, and, reconstituted to liposomes, predominantly transport:

GlcNAc but not alpha- or beta-benzyl GalNAc.

responds to DNA damage, cellular stress and hypoxia by protecting CDKN1A against degradation

ity). Has also a modest lysophosphatidylinositol acyltransferase (LPIAT) activity, converts lysophosphatidylcholine

components: the central clock, residing in the suprachiasmatic nucleus (SCN) of the brain, and drives the retrieval and recycling of NxxY-motif-containing cargo proteins by coupling to SNX and -III complexes. ESCRT-III proteins mostly dissociate from the invaginating membrane before

ly regulates necroptosis by reducing RIPK3 expression (PubMed:29883609). Mediates 'Lys-63

negatively regulating the secretion of type I and type III collagens (PubMed:28939891). This calc

cells self-renewal (By similarity).

phosphorylates ODF2 in vitro (PubMed:23400999). Plays a role in cell cycle progression, spec

of SEC23A, which promotes the transport and secretion of cartilage matrix proteins, and poss

les with an acetylated N-terminal Pro residue (PubMed:29632410).

resses the activity of the circadian transcriptional activator: CLOCK-ARNTL/BMAL1 heterodime

ably by repressing genes promoting cytokinesis and antagonizing action of classical E2F protei

led:22745828).

etion: acts by mediating efflux of calcium from mitochondrion, thereby affecting cytoplasmic ca

ent proteasomal degradation of the transcription factor HBP1 (PubMed:29911972). Acts as a n

EGFR2. Modulates endothelial cell migration in an integrin-dependent manner implicating integ

ion, without promoting KLF7 ubiquitination (By similarity).

i). The MCM8-MCM9 complex is dispensable for DNA replication and S phase progression (Pu

id for membrane tubulation.

duced acrosome reaction. May play a role in cell growth. Modulates the liver regeneration in cc

zzled FZD8 and LRP6. May negatively regulate the TGF-beta pathway (PubMed:21727895, Pu

ubule assembly in axons (Probable).

icrotubule (MT) anchoring to the centrosomes (PubMed:28659385).

Response is triggered by ADP-D-glycero-beta-D-manno-heptose (ADP-Heptose), a potent PAMP pre

o functions in the AP-2-independent endocytosis of the LDL receptor.

mian foamy virus independent of prior ectodomain shedding by furin or furin-like proprotein cor

er for GALK1 (PubMed:12753898). Also active on D-glucose although shows a preference for

unbranched filaments. Contributes to cell motility by controlling actin dynamics. May promote th

ppa-B and FADD respectively (PubMed:12471095, PubMed:12539043, PubMed:14739303). P

independent mechanism that works prior to the proviral integration, together exert efficient an

include GALNS, ARSA, STS and ARSE (PubMed:12757706, PubMed:15907468, PubMed:1565

comes to the trans-Golgi network. Required for the structural integrity of the Golgi complex. Play

EIF2S1/eIF-2-alpha phosphorylation in response to stress converts EIF2S1/eIF-2-alpha in a global  
a negative feedback loop to destabilize Notch 1 intracellular domain (NICD) and downregulate

). Additionally, may play a role in protein biosynthesis by modifying the translation machinery (l  
miRNA and antisense miRNA star (miRNA\*) products. The mature miRNA is incorporated into a R

ary. Within the receptor complex, type-2 receptors (ACVR2A and/or ACVR2B) act as a primary

2006, PubMed:24945728). Contributes to the formation and maturation of the immunological syn



Required for normal cell cycle progression from G2 to mitosis. Required for appropriate cell cycle arrest and ssDNA in tailed duplexes and replication fork structures. May play a role in the extension step of telomere maintenance. In activated T-cells, inhibits PLCG1 activation and calcium mobilization upon restimulation.

RALGAP2, while the predominant TIMM9-TIMM10 70 kDa complex mediates the import of much of the mitochondrial DNA. RALGAP2 is involved in actin capping activity when associated with ABI1, thereby regulating actin-based motility processes.

and for efficient repair of DNA double strand breaks (DSBs) specifically when modified by C-terminal phosphorylation. RALGAP2 is involved in the repair of DNA double strand breaks in close proximity (PubMed:7797075, PubMed:11909973, PubMed:19522541, PubMed:18413230).

transcriptional coactivators, thereby controlling muscle terminal differentiation (By similarity). Interacts with tRNA-Tyr. Stimulates the transcription of the human neurotropic virus JCV.

plays a critical role in both the early and late phases of the IFNA/B gene induction (PubMed:16811111). Inhibits the activity of the voltage-gated calcium channel alpha1A channel opener dehydrosoyasaponin I (DHS-1) triterpene glycoside and for external binding.

phase and for cell division. Plays a role in terminally differentiated hair cells development of the  
MCMBP.

pterin. Acts by mediating the incorporation of 2 sulfur atoms from thiocarboxylated MOCS2A into

nal clustering of sodium channels at heminodes; not required for the formation of mature nodes

may be involved in Ig class switch recombination (CSR) and/or Ig variable region somatic hypermutation  
ative pre-mRNA splicing. Associates to spliced mRNA within 60 nt upstream of the 5'-splice site

the closed conformation thus preventing double-stranded DNA to enter the active site cleft. The  
ed. Associated with the PA200 or PA28, the 20S proteasome mediates ubiquitin-independent  
LP-BER proceeds; endonuclease FEN1 cleavage activity on substrates with double, nick, or gap

ase a master regulator of the DNA damage response (PubMed:24332808). It is required for the adjacent normal tissues has been observed, although no correlation between the level of expres

p-regulates Na(+) channels: SCNN1A/ENAC, SCN5A and ASIC1/ACCN2, K(+) channels: KCN  
: correct loading of SASS6 and CENPJ to the base of the procentriole to initiate procentriole as  
1. Recognizes CDKN1A in association with CCNE1 or CCNE2 and CDK2. Promotes ubiquitina  
ation of negative charges due to aspartate and Na(+) symport (PubMed:8857541, PubMed:266  
9872227). Through binding of the fusogenic protein syncytin-1/ERVW-1 may mediate trophobla  
sion components called SNAREs (Soluble NSF Attachment Protein REceptors) at presynaptic p  
;781166, PubMed:28076346). Is also a component of the minor U12 spliceosome (PubMed:15  
arm tail.

roximity and results in final fusion. Participates in the calcium-dependent regulation of acrosom  
rgeted to histone H3 via its interaction with RB1 and is involved in many processes, such as re

by TCF7 and CTNNB1. May also act as feedback transcriptional repressor of CTNNB1 and TCF

(groEL-2) act via this protein to stimulate NF-kappa-B expression (PubMed:15809303). In com  
unomodulating pentapeptide. TP and TP5 may play a role in T-cell development and function.  
VA 3'-OH attacks the covalent intermediate to expel the active-site tyrosine and restore the DN.

20221403, PubMed:21775632, PubMed:27193233, PubMed:23644599, PubMed:25815583). A

ad:30071723). May also recognize and bind histone H3 succinylated at 'Lys-122' (H3K122succ t of L-DOPA across the blood-brain barrier (By similarity). May act as the major transporter of t

r phosphatase activity allows both the hydrolysis and the cellular uptake of these bioactive lipid

checkpoint in response to genotoxic stress (PubMed:17141802, PubMed:17296725). TIMELESS

ie stability via cooperation with CALM1 and CETN2 (PubMed:16760425).

ading to reduced dephosphorylation of myosin MLC2 by myosin PP1. May be involved in DNA nutrient and hormonal signals. May be involved in telomere length regulation.

in tandem to mediate ubiquitination of target proteins, ARIH1 mediating addition of the first ubiq 08065). Promotes deacetylation of CTTN, leading to actin polymerization, promotion of autoph

h MYLIP-dependent ubiquitination of LDLR, VLDLR and LRP8 (PubMed:19481530). Interplays

to be the major enzyme contributing to LPCAT activity in the liver. Lysophospholipid acyltransferase in murine and human lymphoid lineages (By similarity). Contributes to the maintenance of steady-state ERBB3 levels by r

ay contribute to cancer (PubMed:14767476).

ndle and centrosomes (PubMed:18361916, PubMed:21402792). Involved in centriole duplication and centrosome release (By similarity).

l:24035200). Pol-delta3 and Pol-delta4 are characterized by the absence or the presence of PCNA in centriole replication suggests a possible role in tumorigenesis, centrosome aberrations be

lication initiation, regulating DNA replication initiation (PubMed:10438470, PubMed:19187766,

oy mediating AMPylation of HSPA5/BiP at 'Thr-518', thereby inactivating it (By similarity). In res s thought to be involved in mRNA degradation by activating the decapping step in the 5'-to-3' n

may be involved in Ig class switch recombination (CSR) and/or Ig variable region somatic hyperr

endent manner, and has anti-apoptotic activity (By similarity).

ATM at 'Ser-25'. Together with TP53BP1 regulates ATM association. Proposed to recruit PAGR

and nuclear (TAN) lines which are bound to F-actin cables and couple the nucleus to retrograde

may be involved in Ig class switch recombination (CSR) and/or Ig variable region somatic hypermutation in cancer cells, but not in other cancer cells, via a caspase-2 mediated pathway that involves mit

genes such as CXCL1, CXCL8/IL8 and IL6 (PubMed:16785495, PubMed:17911633, PubMed:18111111). Important role in paracellular Na(+) transport in the intestine and in Na(+) homeostasis. Required

cytochrome P450 proteins (PubMed:22292588).

Prevents easy recognition by sequence homology. This gene encodes a 28S subunit protein that f

Prevents easy recognition by sequence homology. This gene encodes a 39S subunit protein. [prov

position of adenine (N(6)-methyladenosine) (PubMed:30017583). N(6)-methyladenosine (m6A) may play an essential role to ensure accurate mitotic chromosome condensation in neuron stem cells. It also modulate the activity of proteasomes through association with PSMC3. Acts as a tissue specific co-repressor of transcription factors.

Prevents easy recognition by sequence homology. This gene encodes a 28S subunit protein that binds to the 28S ribosomal subunit.

Involved in merging the MT-CO1/COX1 and MT-CO2/COX2 assembly lines (PubMed:29381136).

Not involved in arsenite resistance but rather modulates arsenic sensitivity. Independently of its activity on mitochondrial DNA, it is involved in the regulation of the mitochondrial DNA replication.

he early development of the kidney. May be involved in the regulation of ureteric bud initiation (n and NF- Kappa-B through the RIG-I pathway (By similarity).

the activation of caspase-9, which then accelerates apoptosis by activating other caspases.

naling. Together with NDFIP1, limits the cytokine signaling and expansion of effector Th2 T-ce

led:26297806).

)124). Required for the recruitment of CEP295 to the proximal end of new-born centrioles at the



3. May inhibit STIM1-mediated Ca(2+) influx.  
sion repair machinery. Not involved in processing oxidative damage.

magy and for the cytoplasm to vacuole transport (Cvt). Preferred substrate is MAP1LC3A. Also :

[ RefSeq, Jul 2008]

omes and spindle apparatus during the cell cycle (PubMed:20596670).

of VLCFAs of different chain lengths that are involved in multiple biological processes as precursors

of Kaposi's sarcoma-associated herpesvirus (KSHV) intronless mRNAs and infectious virus production

is involved in transcription regulation of downstream switch regions at the immunoglobulin heavy chain

locus.

SMN2 and is involved in many processes, such as cell cycle regulation, transcriptional repression

of CLNS1A that controls the assembly of the core snRNP. Dissociation by the SMN complex of

of CLNS1A that controls the assembly of the core snRNP. Dissociation by the SMN complex of

(PMID:16046545). Negatively regulates canonical Wnt signaling; at least in part, cooperates with NF- $\kappa$ B

where the GalNAc-beta-3-GlcNAc-beta-terminus is linked to the 4-position of O-mannose, suggesting

Preference for 5'-flap structures, and promotes symmetrical cleavage of static and migrating H

sion, but is dispensable for cartwheel removal or centriole disengagement (PubMed:25131205)

affinity interactor RBM39 (PubMed:31686031, PubMed:31819272). Aryl sulfonamide anticancer

synthesized proteins into the endoplasmic reticulum and reroutes them to the cytosol for proteas

012]

s. Binds to the E-box consensus sequence 5'-CANNTG-3' (By similarity).

PubMed:27541860).

regulating protein levels of ANK1 isoform Mu17 probably implicating CUL3-dependent protea

cessive movement of microspheres along a microtubule in a depolymerization-coupled manner  
oligomerization (PubMed:19289083). Affinity for microtubules is synergistically enhanced in the

rdial fission factor MFF, thereby promoting mitochondrial fragmentation and contributing to the

ulating expression and subcellular location of disheveled proteins. Stabilizes protein levels of J

rocessing via its association with pre-mRNA 3'-end processing factors, establishing a link betwe

bly and, potentially, ciliar re-assembly in cells that have already disassembled their cilia ensurir

f the first strand is rate limiting, while second strand cleavage is rapid. Largely monomeric, dim  
s including T-cell receptor (TCR), CD28 and ITGAL; proposed to be implicated in T cell prolifera

RNA and antisense miRNA star (miRNA\*) products. The mature miRNA is incorporated into a F

RNA and antisense miRNA star (miRNA\*) products. The mature miRNA is incorporated into a RISC complex and exported to the cytoplasm where GTP hydrolysis releases Ran from importin. The directionality of nucleic acid transport is determined by the Ran gradient.

Required for paracellular chloride transport in the kidney (By similarity).

Cellular proliferation. Shows strong GAP (GTPase activation) activity towards CDC42 and RAC1 and

E3 ligases TRAF6, TRAF2 and BIRC2, and E2 ubiquitin-conjugating enzymes UBE2N and UBE2L3 proteins. Subsequently, phosphorylates the STATs proteins once they are recruited to the receptor.

Associated with the APC80 complex to track depolymerizing microtubules (PubMed:23085020). Plays a role in chromosome segregation.

Importin alpha, liberating TPX2 from importin-alpha, allowing TPX2 to activate AURKA kinase and stimulate cell cycle progression.

Induced in the state of macrophages (PubMed:31978345). Enables a purine nucleotide cycle between adenosine and guanosine triphosphate. Isoform 1 is involved in transcription regulation of these genes. Isoform 2 does not activate transcription.

Ubiquitin-dependent protein catabolic process which controls CDKN1B degradation, resulting in p53-mediated transcriptional activation (PubMed:24939902). Acts as a loading platform to recruit DDR proteins that allow completion of DNA double-strand break repair.

RNA and antisense miRNA star (miRNA\*) products. The mature miRNA is incorporated into a RISC complex and exported to the cytoplasm where GTP hydrolysis releases Ran from importin. The directionality of nucleic acid transport is determined by the Ran gradient.

Associated with the centrosome spindle by associating with polymerized microtubules (PubMed:20826784). Involved in centrosome maturation and organization.

ptosis but not CASP9 itself (PubMed:12754298). May be involved in protein transport, membr

ion intermembrane space (in vivo) (PubMed:26071602). Mediates cell survival by inhibiting acti

asomes can also induce pyroptosis, an inflammatory form of programmed cell death (PubMed::

d localization at the cell periphery. Associated with the cytosolic face of lysosomes, the BORC

ably independent of BIRC4 inactivation which seems to occur in the cytoplasm. The BIRC4-XA

re interactions with G-proteins. May be involved in transduction and intercellular transmission o

RNA and antisense miRNA star (miRNA\*) products. The mature miRNA is incorporated into a F

duced centrosome polarization and directional migration in aortic endothelial cells.

450 reductase (CPR; NADPH-ferrihemoprotein reductase) (PubMed:20149798, PubMed:86190



ptosis, and is important for immune self-tolerance. Acts downstream of several immune receptors (e.g., CD28, BTLA-1, HVEM, VISTA, PubMed:19733258, PubMed:26091040). Activates RALA; this leads to the activation of p38

and the radial migration of cortical neurons from the ventricular zone toward the superficial layer

d:23274085). May have an alkylhydroperoxide reductase activity born by the N-terminal domain it does not affect the migration of smooth muscle cells or fibroblasts (PubMed:15467828, PubMed:15467829), DOK1 or ARHGAP35. Adhesion-dependent phosphorylation of ARHGAP35 promotes its association with DOK1 (PubMed:24766809, PubMed:24766810). Its role in tRNA splicing and maturation is required for cell growth.

RIF and TLR4- TICAM1/TRIF signaling pathways (PubMed:27881733).

1 stress, via TORC1 (PubMed:24947615). May positively regulate the transcription by NFE2L2 through the transcription factor NF- $\kappa$ B. May positively regulate the transcription of the RNA-induced silencing complex (RISC), which recognizes target mRNAs through imperfect base pairing.

iated by co-chaperones. The co-chaperones have been shown to not only regulate different steps in the transcription of the RNA-induced silencing complex (RISC), which recognizes target mRNAs through imperfect base pairing.

oper cell cycle regulation of DNA replication (PubMed:16861906, PubMed:16949367, PubMed

iated by co-chaperones. The co-chaperones have been shown to not only regulate different steps  
le as an oncogene promoting tumor growth and progression by positively regulating translation

he cellular signaling molecules diacylglycerol and inositol 1,4,5-trisphosphate. Phosphorylation  
teracts with PARP1 and mediates MRE11-dependent DNA end resection during replication fork  
:9106657).

RNA-induced silencing complex (RISC), which recognizes target mRNAs through imperfect base

ness by inducing cell migration and invasion through its interaction with the actin-binding protein

Med:14506133, PubMed:19793056, PubMed:27804176). Upon DNA-binding, promotes DNA t

led:27499292, PubMed:26878239). May serve as an epigenetic mark that propagates centrom

icrotubule tracks that are detyrosinated (PubMed:25908662). Acts as a processive bi-directional  
acts embryonic stem cells toward a cardiac lineage. Involved in the regulation of DNA synthesis

PubMed:20389281, PubMed:21300290, PubMed:23721412). During EMT, involved with LOXL2 in

central pair apparatus of motile cilia.

RNA-induced silencing complex (RISC), which recognizes target mRNAs through imperfect base

species (ROS), hyperosmotic stress, UV irradiation and hypoxia. Involved in DNA damage response

RNA-induced silencing complex (RISC), which recognizes target mRNAs through imperfect base

1A. In podocytes, may play a role in the regulation of actin dynamics and/or foot process cytoskeleton  
PubMed:10873465, PubMed:12509299, PubMed:12547395, PubMed:19941824, PubMed:20028083, F  
S100B after myocardial infarction may play a role in myocyte apoptosis by activating ERK1/2  
Involved in the control of the directional transport of ITGB1 in mesenchymal cells by phosphorylation

Directly converts sphingosine 1-phosphate to sphingosine, stimulates TRAF2 E3 ubiquitin ligase activity, and promotes activation

adian component PER1 (PubMed:28602820). Inhibits PER1 by repressing the CLOCK-ARNTL

0513427). Dephosphorylates RPS6KB1 and is involved in regulation of cap-dependent translat

ish as trabeculation of the developing heart. Isoform 10 may play a role in motor and sensory ne

t genes and can bind to DNA as either monomers or homodimers, depending on the nature of

ly telomerase-synthesized 3' overhangs and to terminate telomerase action implicating the ass

mediated by type 1 interferon (By similarity). Regulates NOD2-induced pro-inflammatory cytoki

APGEF2 and the Ras inhibitor SYNGAP1, promoting their activity. Also regulates synaptic plas  
oxic response. Required for HIF1A mRNA stability independent of poly(A) tail length regulation  
. Has an inhibitory effect on cytokine production in response to T-cell receptor/CD3 cross-linkin

ubMed:20347428). In complex with CENPT, CENPW and CENPX (CENP-T-W-S-X heterotetra

expression the J and/or S elements in MHC II promoter (PubMed:7969177). Acts as a negative

reducing its autoinhibitory phosphorylation at Ser-308 thereby increasing its catalytic activity (I  
romoter of hypoxia-inducible target genes and hence inhibits HRE-driven transcriptional activat

erage reaction. Possesses an intrinsic strand annealing activity.

gulation. May be responsible for the liver-specific activity of enhancer II, probably in combinatic

r and DNA damage response pathways. Mediates ubiquitination and subsequent proteasome c

pendent manner (PubMed:29301984). Acts as a positive regulator of monocyte migration and

r cytoplasmic polyadenylation of mRNAs involved in carbohydrate metabolism, including the glu

l and proliferation in response to BCR stimulation, efficient IgG1 antibody responses to T-cell-d  
ckpoint and survival in response to ionizing radiation (PubMed:19238419, PubMed:22132193).

rt regulator of innate immune signaling via regulation of Toll-like receptors (TLRs), Nodlike rece

RNA-induced silencing complex (RISC), which recognizes target mRNAs through imperfect bas  
osomal degradation; Lys-33-linked is involved in kinase modification; Lys-48-linked is involved



MYT1, KIZ, PPP1R12A/MYPT1, PRC1, RACGAP1/CYK4, SGO1, STAG2/SA2, TEX14, TOPO  
llular chromosome bridges and accumulation of DNA damage: phosphorylates CHMP4C, leadi  
e skeleton in regulating glucose metabolism (By similarity). Iso acts as a key regulator of chond

of the circadian clock: in the input component, is involved in modulating the magnitude of photi  
pendent on class II bHLH factors and namely modulates the differentiation program initiated by

aired for genotoxic stress-induced cell death in breast cancer cells.

IFIT3 sequesters COPS5 in the cytoplasm, thereby increasing nuclear CDKN1B/p27 protein le

SCF and KIT promote activation of PLCG1, leading to the production of the cellular signaling

miRNA-induced silencing complex (RISC), which recognizes target mRNAs through imperfect base pairing and stimulates their capacity to induce apoptosis and regulate cell cycle. In response to double

of MAP kinases, but has no kinase activity (PubMed:15299019, PubMed:26455797).  
nuclear localization of PLK1 and CENPF. May play a role in the tension sensing mechanism of th

tribute to the internal structure of mitotic chromosomes (By similarity). May play a role in chrom

ful cell division (PubMed:23035123). May be involved in UV-induced apoptosis via its interacti

on of BCAR1. May be involved both in adult synaptic function and plasticity and in brain develop

ent alternative splicing into isoform 3 is required in mechanosensory hair cells in the inner ear fc  
8856, PubMed:11705987, PubMed:16260596, PubMed:12944386, PubMed:14751237). The L

the cytokine dimer results in the phosphorylation and the activation of TGFBR1 by the constit

on of sperm chromatin. Involved in obesity resistance through regulation of metabolic genes su  
activation of STAT family members STAT1, STAT3, STAT5A and STAT5B. Activation of PLCG1

inant-negative regulator of C/EBP-induced transcription: dimerizes with members of the C/EBP

n is enhanced in the presence of NDFIP1 (PubMed:25631046). Plays a role in dendrite formati  
ates the TLR2 signaling pathway to activate specifically the downstream p38 and JNK MAP kin  
roxymethylcytosine (5hmC), suggesting that it acts as a specific reader of 5hmC.

LA transcriptional activity in response to TNF and upon glucocorticoid, associates in the cytopl

RNA-induced silencing complex (RISC), which recognizes target mRNAs through imperfect bas  
romatin where it recruits different chromatin modifiers required for this chromatin replication. Al

RNA-induced silencing complex (RISC), which recognizes target mRNAs through imperfect bas

). The interaction with PDCD1/PD-1 inhibits cytotoxic T lymphocytes (CTLs) effector function (  
, PubMed:24627487). Also involved in down-regulation of the androgen receptor (AR), enhanci  
RNA-induced silencing complex (RISC), which recognizes target mRNAs through imperfect bas

keletal growth, matrix homeostasis and growth plate function (By similarity).

enobiotics such as tazarotenic acid (PubMed:26937021).

ity by blocking granule exocytosis by mediating homophilic binding to adjacent cells, allowing in

ole in DNA repair by HR. Plays a role in regulating mitochondrial DNA copy number under con

its adenylate cyclase activity, leading to decreased intracellular cAMP levels (By similarity). The

RNA-induced silencing complex (RISC), which recognizes target mRNAs through imperfect bas

n of heat shock response, seems to play a positive feedback with HSF1 to modulate heat-shoc

ed in regulation of apoptosis. May be involved in protecting chondrocytes from apoptotic death

or epithelial fusion during palate development by regulating activation of TGF-beta-3 (TGFB3)

RNA-induced silencing complex (RISC), which recognizes target mRNAs through imperfect base pairing by DNASE1 and DNASE1L3 is required to prevent formation of clots that obstruct blood vessel  
ing the complex to target sites (By similarity). Inhibits ubiquitination and subsequent degradation

from mitotic arrest. May play a role for tumor suppression.

Ensuring proper chromosome segregation and binding to BUB3 is essential for this function. Can

promote enrichment of AUKRB in prometaphase.

Presence of two conserved methyltransferase motifs. Functions as a transcriptional corepressor by associating

(PubMed:15485867). Involved in the regulation of liver cancer cells self-renewal (PubMed:259857

PCM1 (PubMed:29973724). Does not mediate disassembly of all membraneless organelles: demonstrating that it may also act as a regulator of smooth muscle cell differentiation and proliferation.

ent (ISRE) in their promoters. Its target genes for transcriptional activation activity include: gene

ssing via its association with pre-mRNA 3'-end processing factors, establishing a link between

te differentiation (PubMed:12925201). Involved in lipid raft organization and CD1D localization

undetectable in vitro, or very low (PubMed:21397848). In addition, cardiolipin is almost exclusi

ome family members, but it is not yet clear if it represents a distinct pathway or if it can be integ

ys seem to involve interactions with G-proteins. May be involved in transduction and intercellul

RNA-induced silencing complex (RISC), which recognizes target mRNAs through imperfect bas

asomic retention of TFEB and TFE3 (PubMed:31672913). Together with FLCN, regulates autophagy (PubMed:27332895). The flexibility of the SAH domain is proposed to allow AURKB/C to follow the chorionic somatomammotropin-B gene enhancer.

region.



s-860'. Participates in the ETV6-mediated repression. Probably plays a role in cell proliferation.

various RNA species. Binds to the U8 snoRNA; metal is not required for RNA-binding. May pl:

for example neural stem/progenitor cells and tumor cells, suggesting a role in replication-assoc

with the highest activity toward 1-octadecanoyl-2-(5Z,8Z,11Z,14Z-eicosatetraenoyl)-sn-glycerol t  
rs, including ARHGEF2, BORA, BRCA1, CDC25B, DLGP5, HDAC6, KIF2A, LATS2, NDEL1, P

with MutS alpha regulates binding similar to a molecular switch: mismatched DNA provokes AC  
1177, PubMed:16373578, PubMed:22942274, PubMed:26859324, PubMed:27226593). This c

ote the survival of cells with a compromised HR repair pathway, thereby preventing genomic h:

in hepatocytes, inhibits growth hormone signaling (By similarity).

in the nucleus in regulating the expression of various cytokines (PubMed:15793005). May regul

RNA-induced silencing complex (RISC), which recognizes target mRNAs through imperfect bas

In response to LPS, modulates inflammatory responses by playing a key role on the regulatio

agonizing action of classical E2F proteins (E2F1, E2F2 and/or E2F3). Required for placental de  
RNA-induced silencing complex (RISC), which recognizes target mRNAs through imperfect bas  
ed:23817040). Plays a role in promoting protection against cell death during hypoxia by decrea

led:12867411, PubMed:15465040, PubMed:18511070).

is ZBTB7B transcription factor during cytotoxic (CD8+) T cell development. They bind to RUNX

MST2 and STK4/MST1 activation and promotes cell-cycle exit and terminal differentiation in de

ration. Regulates cortical neuronal migration by mediating NTRK2/TRKB anterograde axonal tr

notes brown adipocyte differentiation (By similarity). Inhibitor of WNT signaling (PubMed:20028

CLNS1A from the trapped Sm proteins and their transfer to an SMN-Sm complex triggers the

classes of DNA response elements within the promoter of its target genes and can bind to DN

phosphorylation of NDC80. Involved in regulation of mitotic checkpoint protein complex via phos

eprogramming (PubMed:28740264).

RNA-induced silencing complex (RISC), which recognizes target mRNAs through imperfect bas

is required for the increased expression of the thermogenic and anti-inflammatory gene program

merization with one of the small Maf proteins and binding to ARE elements of cytoprotective ta

by assembling into the HDP-RNP complex, a complex that serves as a platform for IRF3 phospho

tion of hepatocytes after partial hepatectomy. Mediates responses to ischemia and hypoxia; re

thesis, involved in loading DNA polymerase POLE at the sites of local damage (PubMed:20227:

f AMPA receptors (AMPARs) in response to synaptic activity: this endocytic pathway maintains

rates EPHA2 by inducing tyrosine phosphorylation which leads to its internalization and degrad

FANCG, FOS, GFAP, GOLGA2/GM130, GRASP1, UBE2A/hHR6A, HIST1H1 proteins/histone

ceramide 1-phosphate/C1P (PubMed:9705349, PubMed:9607309, PubMed:27694435). Also ε  
isoform Alpha. Exerts a dominant negative effect on isoform Alpha trans-repression mechanism

ions in signaling downstream of integrin and collagen receptors, immune receptors, G-protein c

the base of the ciliary membrane. Required for proper BBSome complex assembly and its cilia  
trafficking of ATG9A upon activation of autophagy. May regulate the recruitment of ATG9A-AI

A damage sites via PARP9 binding to ribosylated PARP1 (PubMed:23230272). Subsequent P  
dependent transcription.

with various co-chaperone proteins or complexes, that act as adapters, simultaneously able to

l). Plays a role in the formation of the ciliary vesicle (CV), an early step in cilium biogenesis. Pri

PubMed:11743006). Although inserts the correct base, may cause base transitions and transve

t signaling between antigen presenting cells and lymphocytes. In response to ligation of TNFSF

ceptors subunits BMPR1A, BMPR1B, BMPR2 and ACVR2A, leading to the activation of SMAD  
t express chemokine receptors CCR7 and CCR9, by reducing the availability of CCL19, CCL2

otic neurons (By similarity).

mediates of the riboflavin pathway with by-products arising from other metabolic pathways suc

R of diverse inflammatory mRNAs (such as ceruplasmin), suppressing their translation. Interfe

r targets single-stranded DNA and does not deaminate double-stranded DNA or single- or douk

α-D1 and CDKN1C/p57Kip2 specifically in quiescent cells. Involved in regulation of the Wnt sigi

responsible for detecting the Picornaviridae family members such as encephalomyocarditis virus

pathway possibly by directly interacting with the phosphatidylinositol 3-kinase regulatory subunit

permeability. CLDN1 is required to prevent the paracellular diffusion of small molecules through tight

family of isomers, with each of them potentially having a specialized function. Induces T-cell proliferation

regulate nitric oxide (NO) production via the reduction of nitrite to NO with NADH or aldehyde as electron



:9705271, PubMed:9651580). The complex may also be required for DNA damage signaling vi

involved in neuroblastoma G1/S phase cell cycle progression and cell proliferation inhibition by ε

K-related kinases TBK1 and IKKε which in turn phosphorylate the interferon regulatory factor ε  
(PubMed:24824780).

ria delivered to the cytoplasm (PubMed:26300263). Acts by binding cyclic dinucleotides: recogn

By similarity).

protein involvement appears to vary significantly depending on the receptor, agonist and cell type.

. May also be involved in the differentiation of the fibroblast-like cells in the superficial layer of r

that the inhibition of phosphorylation may be the result of sumoylation of STAT1 'Lys-703' (PubMed  
c dystrophy pathophysiology (DM).

s, binds to the cytokine receptor WSX-1/TCCR. Another important role of IL-27 is its antitumor  
via virus (MoMLV) and xenotropic MuLV-related virus (XMRV), filoviridae: ebola virus (EBOV) a

downstream partner IRF3 to produce IFN-beta. Plays a neuroprotective role in the eye and optic ne

expression of the immune checkpoint protein CD274 in ARNTL/BMAL1-deficient macrophages (By si

on chromatin and accelerate DNA ligation during non-homologous end-joining (NHEJ) (PubMed

osome process.

334318). Required for the exosomal release of SDCBP, CD63 and syndecan (PubMed:226604  
alpha-dystroglycan (DAG1) (By similarity).

class switch mediated by TLR9. Involved in the antigen presentation function of B-cells. Involved

PARP1-dependent PARP9-DTX3L-mediated ubiquitination promotes the rapid and specific re

tion by influencing the assembly and activity of the PRKCZ-SQSTM1-TRAF6 multiprotein signa

clobutane pyrimidine dimers (CPD), 6-4 photoproducts (6-4 PP), apurinic sites and short mismatches.

otic cells, platelet aggregation, cytoskeleton reorganization and engulfment. Functions in the retina.

ALX binds and induces tyrosine phosphorylation of PI3-kinase subunits PIK3R1, PIK3R2 and FAK. Its activity is controlled by various mechanisms of post-translational modification and subcellular compartmentalization.

ocrine regulator in fine-tuning trophoblast invasion generated by the trophoblast itself. The receptor is expressed in the placenta.

.1 and ITSN1. Involved in endocytosis of cystic fibrosis transmembrane conductance regulator/CFTR.

phosphatidic acid, another bioactive lipid, through the phosphorylation of 1-alkyl-2-acetyl glycerophospholipids. It is involved in the regulation of cytoplasmic dynein-dynactin motor complexes; SYNE1 and SYNE2 may act redundantly. Required for the function of the sarcolemmal Na<sup>+</sup> pump in the sarcolemmal reticulum, regulates the membrane potential. In cochlea cells, its null mutation causes deafness.

and insulin sensitivity (Probable). Inhibits proliferation, migration, and tubule formation of endothelial cells.

Acts via the classical RNASEL-dependent pathway or an alternative antiviral pathway independent of RNase L. Participates in sex determination and early gonad development by stimulating the alternative antiviral pathway independent of RNase L. Displays antiviral activity against Chikungunya virus (ChikV).

Interacts with IκBα (PubMed:12077347). May play a role in the development of neuromuscular junction (PMID:12077347).

Localizes to the base of the ciliary membrane. The BBSome complex, together with the LTZL1, controls SMN2 expression.

Component of the nBAF complex, together with the NPBAF complex, controls SMN2 expression.

The mitochondrial outer membrane regulates the opening of a pore in the mitochondrial double membrane. Component of the ternary complex, cyclin D1/CDK4/CDKN1B, required for nuclear translocation of cyclin D1.

Associated with cone-rod dystrophy in human patients. [provided by RefSeq, May 2016]

Disrupts insulin signaling by binding directly to Akt kinases and blocking their activation (PMID:12077347). Inhibits activation of caspases. Appears to regulate cell death by blocking the voltage-dependent calcium entry.

Interaction with SELPLG is mediated by association with SELPLG and dependent on phosphorylation by SRC-family kinases.

location of lysosomal proteins from the cytoplasm to the mitochondrial matrix. May function as

as on the function of the cysteine desulfurase complex NFS1-LYRM4/ISD11, which serves as th

activating immune/hematopoietic cell receptor systems. Acts as a negative regulator of myeloid  
induced to induce autophagy as an early stress response to small double-stranded RNA and at later

directly plays a role in Toll-like receptor (TLR) signaling: ability to inhibit TLR-mediated NF-kappa

(PubMed ID:27281216).||Plays a role in the TP53-regulated cellular response to DNA damage probably k

n which transformation of interstitial fibroblasts into myofibroblasts plus collagen deposition occ

ites of inflammation.

s to be hormone-sensitive. Regulator of chondrogenesis and osteogenesis and inhibits early h  
robably via the regulation of cytoskeletal rearrangements. In the nervous system it has been st

lpha-2-macroglobulin receptor (PubMed:26142438).

includes TAK1, TAB2, and TAB3). Activation of the MAP3K7/TAK1 complex by autophosphory

elements (5'-CACGTG-3') found within the promoters of its target genes (PubMed:15560782). I  
d:12075506, PubMed:15317753, PubMed:18611980). Also prevents fat infiltration of muscle a  
ubMed:10753840).

ctivity. Component of the ternary complex, cyclin D2/CDK4/CDKN1B, required for nuclear trans

d exclusion of exon 5 of the NMDA receptor R1 pre-mRNA. Involved in the apoB RNA editing ε  
κonic enhancer (By similarity). Can regulate alternative splicing of neurexins NRXN1-3 in the la  
r targets single-stranded DNA and does not deaminate double-stranded DNA or single- or dou  
d by human adenovirus E3-19K glycoprotein, which binds the TAP complex and acts as a tape  
regulates protein synthesis by phosphorylating key regulators of mRNA translation and ribosom  
j (PubMed:28978524). Acts as a receptor for extracellular ubiquitin; leading to enhanced intrac

c, Rap and Rho GTPases activity. Plays an important role in the development of the nervous s

nsported to the Golgi, where it is cleaved in a site-specific manner by resident proteases S1P/I

ylates LAT, which recruits numerous signaling molecules to form the LAT signalosome. The L/

ibMed:23269243). During inflammation, limits the activity of inflammatory caspases CASP1, C/

gatively regulates IFN-beta production post-pathogen recognition by polyubiquitin-mediated de

optosis enhancing preferentially the DNA binding and transactivation of p53/TP53 on cell-cycle

activation of transcriptional programs associated with oncogene and proto-oncogene mediated

ation by acting a regulator of immune response in skin: promotes Th1/Th17-dominated immune

tes large amplitude ACh-evoked currents through alpha-4:beta-2 nAChRs. Is involved in regula



medium-chain dicarboxylic fatty acids which are essential regulators of all fatty acid oxidation p

L31RA (PubMed:15194700). Acts as a regulator of inflammatory response by regulating differ  
is, such as stimulated growth factor receptors, lysosomal enzymes and lipids. The MVB pathwa

the process by which immature dendritic cells differentiate into fully competent antigen-presenti  
of longitudinally projecting axons (By similarity).

ment. Rotation of the central stalk against the surrounding alpha(3)beta(3) subunits leads to hy

RNA-induced silencing complex (RISC), which recognizes target mRNAs through imperfect base pairing and subsequent degradation (PubMed:26565908).

and protects neuronal cells from apoptosis (via the N-terminal domain). Induces neuronal proliferation (By similarity).

RNA-induced silencing complex (RISC), which recognizes target mRNAs through imperfect base pairing and subsequent degradation (PubMed:26565908).  
heme-bound DGCR8 dimer binds pri-miRNAs as a cooperative trimer (of dimers) and is active

thereby acts as a transcription repressor (PubMed:22722849). Moreover, H3K18 hypoacetylation

the cell cycle and become committed to their adult state. The transition from proliferating neural

nt role in regulating the choice of the DNA double-strand breaks (DSBs) repair pathway and G:

rowth factor (EGF)-induced MAPK8/JNK1 activation and subsequent JUN phosphorylation. Ph

a PALB2-scaffolded HR complex containing BRCA2 and RAD51C and which is thought to play in vitro; it is however unclear whether UBE2D1/UBCH5 acts as an E2 enzyme for the APC/C in

aired for cellular apoptosis in response to cisplatin treatment.

ation.

nd the peripheral clocks that are present in nearly every tissue and organ system. Both the cen

receptor) to neuronal postsynaptic density and may function in localizing synaptic vesicles at sy

of NR5A1 expression (PubMed:19361780).

IL6 and IL12B, during the early phase of inflammation (PubMed:26320658). Prevents aberrant

mental role in kinetochore assembly and function. It is one of the inner kinetochore proteins, with RNA-induced silencing complex (RISC), which recognizes target mRNAs through imperfect base

AKT1. Phosphorylates: PTPN1, SRSF1 and SRSF3. Regulates the alternative splicing of tissue RNA-induced silencing complex (RISC), which recognizes target mRNAs through imperfect base

, which is required for embryonic stem cell identity and proper differentiation. The PRC2/EED-E generate more than 100 centrioles (By similarity). Overexpression of CEP152 can drive amplification RNA-induced silencing complex (RISC), which recognizes target mRNAs through imperfect base

inflammatory genes activated through TLR/IL-1 receptor signaling. May promote apoptosis (By similarity) in these regions. KMT5C is targeted to histone H3 via its interaction with RB1 family proteins (F

body energy homeostasis (By similarity). Contributes to the biosynthesis of membrane phospholipids

e MHC-I locus) and also by recruiting corepressors (HDACs) or coactivators (HATs) directly to

r. Electrons originating from reduced cytochrome c in the intermembrane space (IMS) are trans

nd the peripheral clocks that are present in nearly every tissue and organ system. Both the cen

ole in myoblast differentiation and also in the down-regulation of cyclin D1 in response to hypox

nd the peripheral clocks that are present in nearly every tissue and organ system. Both the cen

s of autophagy, possibly autophagosome-lysosome fusion and/or lysosomal exocytosis in neur

ter sequence containing the DNA motif 5'-CGGTCA-3'; in cooperation with a PBX protein (such

: required for dimerization of the ATP synthase complex and as such regulates ATP synthesis i

1 SYK tyrosine kinases leading to activation of PLCG2 (PubMed:18955485).

2 RNA-induced silencing complex (RISC), which recognizes target mRNAs through imperfect base

3 pairings and recycling of major histocompatibility complex (MHC) class II probably involving retromer and

4 adenylyl cyclase, stimulates phospholipase A2, activates potassium channels, inactivates voltage-

5 RNA-induced silencing complex (RISC), which recognizes target mRNAs through imperfect base

6 pairing (PubMed:9425121, PubMed:10358058, PubMed:17472963, PubMed:18451993). Selectively hydrolyzes

7 phosphatidylcholine to release free fatty acid in unesterified fatty acid (By similarity). Specifically required for blood-brain barrier for

arity).

nd the peripheral clocks that are present in nearly every tissue and organ system. Both the cen

d shear-mediated deflection of the primary cilium, which decreases intracellular cAMP, leads to

rdulin signaling pathway by regulating AKT1 activation and NOS3 activation in endothelial cells  
esis via RAB11A.

one and mineralocorticoid receptors, that can bind to its GRE mimic region. Multiple functions

apped DNA substrates of a partial duplex DNA structure for helicase loading and translocation ;

of DNA virus-mediated innate immune response by assembling into the HDP-RNP complex, a c

ment. Rotation of the central stalk against the surrounding alpha(3)beta(3) subunits leads to hy

RNA-induced silencing complex (RISC), which recognizes target mRNAs through imperfect bas

SMCR8 complex also acts as a regulator of autophagy initiation by interacting with the ATG1/L  
F10/BAF45A, are exchanged for homologous alternative ACTL6B/BAF53B and DPF1/BAF45B

s as aminophospholipid translocase at the plasma membrane in neuronal cells.

RNA-induced silencing complex (RISC), which recognizes target mRNAs through imperfect bas

RNA-induced silencing complex (RISC), which recognizes target mRNAs through imperfect bas

RNA-induced silencing complex (RISC), which recognizes target mRNAs through imperfect bas

BRCA1 (PubMed:19887602). In vitro able to promote polyubiquitination using all 7 ubiquitin L<sub>1</sub>



y similarity).

ognitive disability, congenital heart disease, neuroblastoma, and congenital kidney and urinary t

PubMed:19965576, PubMed:20972997, PubMed:10681376). Catalyzes the hydroxylation of c:

RNA-induced silencing complex (RISC), which recognizes target mRNAs through imperfect bas

also phosphorylate FXD1/PLM which is able to induce chloride currents. May also play a role  
'296872).

teins, enrolling them in cell proliferative control (PubMed:22615398).

RNA-induced silencing complex (RISC), which recognizes target mRNAs through imperfect bas

aptic density keeping the channels in an activated state in the presence of glutamate and preve

isions (By similarity).

RNA-induced silencing complex (RISC), which recognizes target mRNAs through imperfect bas



secretase cleavage of APP by enhancing endoproteolysis of PSEN1.

RNA-induced silencing complex (RISC), which recognizes target mRNAs through imperfect base pairing.

of CREBBP to the promoter by a CREST-dependent mechanism, which leads to transcriptional activation.

via direct interaction with NOTCH2 (PubMed:29856954). Also promotes Notch signaling pathway. IGF1 stimulation regulates cell growth and proliferation by controlling mitochondrial DNA replication.

mesenchyme, in turn, triggers epithelial outgrowth and augments MSX2 expression, which cause

r. Electrons originating from reduced cytochrome c in the intermembrane space (IMS) are trans

by RefSeq, Mar 2015]

is formed by the variable domain of one heavy chain, together with that of its associated light

so a role in synaptic plasticity in adult brain through regulation of synaptogenesis. In addition to increase translation efficiency. May also participate in respiratory regulation.

DL2L11-DYNLL1 complex dissociates from cytoplasmic dynein and translocates to mitochondri

fluid (CSF) APOE- and APOA1 levels. Together with APOE and the cholesterol transporter AE

ranscriptional activity of MYOD1 through its CDK9-mediated phosphorylation and binds the chr  
ase excision repair substrates. The 9-1-1 complex is necessary for the recruitment of RHNO1 t

ntigen-specific T-cell activation in synergy with PDCD1/PD-1, possibly by acting as a corecept

chloride-bicarbonate, chloride-oxalate, oxalate-formate, oxalate-sulfate and chloride-formate e

ral role in heart morphogenesis and angiogenesis through regulation of cell adhesion and cell r

RNA-induced silencing complex (RISC), which recognizes target mRNAs through imperfect bas

ve regulator of neuronal RAC1 activity (By similarity). Regulates macrophage functions such as

:20959412). Acts as a positive modulator of adenosine receptors ADORA1 and ADORA2A, by  
to both the clathrin lattice and to the lipid and protein components of membranes are consider  
presenting cells. May have a role in angiogenesis and promote cholesterol crystallization. Ma

' a role in promoting immune suppression and T cell TNF-alpha production during gestation (Pt

ections or viral reinfection (By similarity). Binds specifically to the PRDI element in the promote  
signaling of TEK and FLT1 receptors, 2 important receptor families essential for angiogenesis. I  
mitochondrial outer membrane permeabilization, in a BAX- and BAK1-independent manner, in  
esses (PubMed:25106868). Binds to 3'-UTR ARE of numerous mRNAs (PubMed:20506496, Pt

β1-mediated signaling through the Wnt pathway (By similarity). Negatively regulates TGFB1-me

ning receptor kinases and membrane proteases (PubMed:18757307, PubMed:23589287). Suc

olarity complex and RAP1B (PubMed:20332120). Required for activation of PRKCZ and for the

lipoprotein clearance.

aling events in gamma-delta T-cells through PI3-kinase and MAP kinases. It results in prolifer  
ubulin and stabilization of microtubules (PubMed:19893491). Plays a role in the regulation of n  
ition of SMPP1M functions to enhance muscle responsiveness to Ca(2+) and promote a contrac  
anscriptional activation. Acts as a positive transcriptional regulator of cyclin CCND2 expression.

ons as a regulator of internal calcium mobilization across the dense tubular system that affects  
optic disk. In addition to axon guidance, also regulates dendritic spines development and matu



has a protective role in establishing the endothelial barrier; the activity involves coagulation factor type I and IV, vitronectin, tenascin, laminin, fibronectin, fibrin or casein (PubMed:9065413)

negative regulator of VEGFC-mediated lymphangiogenesis and angiogenesis. Binding of vasculature including the actin regulator WAS and the microtubule-associated proteins MAP2 and MAP1

preventing apoptosis, optimal cytokine signaling during human natural killer cell development, hepatocellular carcinoma

antioxidant defense mechanism. Isoform 3 seems to be inactive. (PubMed:25445488).

regulation of its target proteins (PubMed:15525651, PubMed:17565996). Promotes tumor cell invasion

MAPK3 signaling downstream of 5HT4-receptors. Phosphorylation of HDAC5, a repressor of myoD, leads to stabilization of KDM4A and subsequent histone H3 'Lys-9' (H3K9) demethylation (By similarity)

3 methylated at 'Lys-5' (H3K4me2) in estrogen-regulated genes. Involved in the development of the

ard current by internal magnesium.

Is, increasing disulfide reductase activity at the plasma membrane, altering the plasma membr:

se of TAF10 from promoters, leading to inhibition of TFIID-dependent transcription (PubMed:24

onist activity. Lactoferroxin A shows preference for mu-receptors, while lactoferroxin B and C h

im effectors by MET leads to the activation of several signaling cascades including the RAS-EF

PubMed:27545619). Recognizes and binds histone H3 crotonylated at 'Lys-9' (H3K9cr), and w

d the peripheral clocks that are present in nearly every tissue and organ system. Both the cent

ral pathway independent of RNase L. The secreted form displays antiviral effect against vesicu

calcium sensitivity and relaxation kinetics of thin myofilaments. May also be involved in early ne step, catalyzed by the peptidylglycine amidoglycolate lyase (PAL) domain, is the zinc-depender (PubMed:24705027).

7580308). Homophilic ligation of PECAM1 prevents macrophage-mediated phagocytosis of nei membrane thus protecting hepatocytes from bile salts. Together with TMEM30A is involved in

MEPE degradation (PubMed:12220505).

remodeling which involves modulating the size and composition of HDL (PubMed:29883800).

component of interferon gamma-induced sensitivity. Plays a key role in apoptosis via the degra

kinase B and glycogen synthase kinase-3 and insulin induced stimulation of glucose uptake

4829). Mediates dephosphorylation of NTRK1, NTRK2 and NTRK3 (By similarity). Plays a role

ing mitosis, supports the stabilization and elongation of the intracellular bridge between dividing

storage vesicles containing the glucose transporter SLC2A4/GLUT4 (GLUT4 storage vesicles,

PubMed:9038201, PubMed:11352563). Involved in the recruitment of both the proinflammatory IL

as adhesion of those leukocytes to endothelial cells. May play a role in regulating leukocyte ad

ival of developing tissues such as the neural tube, branchial arches and somites, thereby contr

s activated following engagement of receptors and plays a role in the activation of other proteir

; proteolytic processing of NFKB2, and thereby inhibits non-canonical activation of NF-kappa-B

ated in many fundamental cellular processes, including growth, differentiation, migration, morp

.RAP25 mediates the targeting of LIMK1 to the lamellipodium resulting in its activation and sub

its prior to initiation (PubMed:17581632). The eIF-3 complex specifically targets and initiates tr

n of NFkB1 by TNF-alpha, nerve growth factor (NGF) and interleukin-1. May play a role in titin/

uring Salmonella enterica serovar Typhi (S.Typhi) epithelial cell infection (PubMed:22042847).

Recruited to inflammasomes by MEFV. Induces formation of pyroptosomes, large supramolecu

o mediate tethering and docking events during SNARE-mediated membrane fusion. The CORV

aximal enzymatic activity of Polycomb repressive complex 2 (PRC2); acts as a positive regula  
terminal, non-reducing ends of oligosaccharide chains.

JNK-signaling components and motor proteins. Functions as an anti-apoptotic protein and whc

PubMed:25861989). Promotes UBP10-induced deubiquitination of TRAF6 in response to DNA d

ion, tissue organization, and the regulation of the immune response (PubMed:12432078, Publ

uter surface protein A lipoprotein (OspA-L) cooperatively with TLR2 (PubMed:11441107). In co

96, PubMed:21376833). Interaction with CD44 promotes directional cell migration in epithelial cells  
during mRNA with large polyribosomes and translation initiation. According to some authors, is r

PubMed:12699629).||Plays a role in nonsense-mediated mRNA decay (PubMed:18974281, Pub

he actin cytoskeleton (PubMed:12183458). Plays a role in axon guidance, invasive growth and  
ohogenesis.

ubMed:19525956, PubMed:21613998, PubMed:21720370, PubMed:23602554, PubMed:2360  
mbined capacity to interact with RECK extracellularly and recruit the Dishevelled scaffolding pro

)P3 (PubMed:16143324). Also binds 25-hydroxycholesterol and cholesterol (PubMed:1742819  
:28561066). Involved in an early step of the formation of preautophagosomal structures (PubM

via caspase-6). Negatively regulates oligodendrocyte survival, maturation and myelination. Plays a role in recruiting and activating caspase-1. In innate immune response believed to act as an integral adapter protein (PubMed:27829214). It may also positively regulate the function of p53/TP53 in cell cycle arrest and lipopolysaccharide-mediated activation of NF- $\kappa$ B. May produce superoxide in the nucleus.

phosphorylation.

localizes to membranes enriched in phosphatidylinositol 4,5-bisphosphate and promotes membrane tubulation.

may have a role in the survival of glioma cells.

involved in defense against viral protein synthesis and virus replication (By similarity). Inhibits neuronal cell cycle progression, HIF1B, and increased expression of hypoxia-inducible genes. EGLN1 is the most important isoform.



. Specifically regulates the expression of FGFR2-IIIb, an epithelial cell-specific isoform of FGFR2

so induces the retraction of MVECs lamellipodia and filopodia in a ROCK pathway-dependent manner

mediated by the GRAM domain (By similarity). At the EPCS, the sterol-binding VASt/ASTER domain

recruits the substrate (PubMed:19075014, PubMed:27373336). In complex with USP12, acts as a

! Coexpression of SMURF2 with SMAD1 results in considerable decrease in steady-state level

onal cells (By similarity). The SCF(FBXL17) complex mediates ubiquitination and degradation of PRKN. (1) mediating phosphorylation at 'Ser-65' of PRKN and (2) mediating phosphorylation of ubiquitin, converting PRKN to act as a molecular switch that can vary the balance between NaCl reabsorption and K(+) reabsorption.

pressor; isoform 2 has lower transcription repressor activity than isoform 1 and isoform 3. |||Isoform 1 is the major isoform expressed in most tissues.

IL-2 production in the presence of T-cell receptor signaling. CD40L/CD154, two cell surface molecules on lymphocytes that are critical for antigen-dependent T-cell activation.

ER stress, which then fuse with lysosomes for degradation. (PMID:25762780).



orientation during mitosis (PubMed:23649807).

ine production by mature dendritic cells.

LKL-mediated necroptosis via its role in the biosynthesis of inositol pentakisphosphate (InsP5)

tion.

ceramides and unsaturated very long-chain ceramides are also good substrates, whereas sat

J) and directs key events in postsynaptic differentiation. Component of the AGRN-LRP4 recept

n the regulation of cell adhesion and motility through phosphorylation of key regulators of these

980435). Plays a protective role in the cellular response to oxidative stress (PubMed:19130894).  
ased exposure to acetaldehyde in individuals with the catalytically inactive form may also conf

PubMed:8782822). Has actin bundling activity and stabilizes actin filaments against depolymerization.

Interacts with KAT5/TIP60, probably explains its transcription activation activity. Functions in association with GPC1 in lipid rafts. Also binds GPC1 in lipid rafts. Appicans elicit adhesion of neural cells to the extracellular matrix.

PubMed:28296633).

Involved in the in vitro remodeling of H3.3-containing nucleosomes. Its heterochromatin target is the inactivation of H3.3-containing nucleosomes.

Participates in axonal growth, pathfinding and in the modulation of dendritic growth in the nervous systems.

Interacts with SLC16A11 and SLC16A12 to the plasma membrane (PubMed:21778275). Plays pivotal roles in the replication of the human immunodeficiency virus (HIV), human cytomegalovirus (HCMV), influenza virus (IAV), feline immunodeficiency virus (FIV), prototype foamy virus (PFV), Mason-Pfizer virus (MPV).

PubMed:17431401). Acts synergistically with ELF4 to transactivate the IL-3 promoter and with ELK1. Ability changes induced following virus infection.

Promotes the production of newborn neurons, probably by modulating G1 length. Promotes, at least in part, BCL6-induced transcriptional repression. Binds to E2F1 and MYC and blocks their transcriptional activity.

itself (PubMed:11123922). Binding to cell surface receptors triggers internalization of the chap

tin and adherens junctions components. The homodimeric form may regulate actin filament as

enzymatic activities, such as single-stranded DNA (ssDNA)-dependent ATPase, 5'-3' helicase  
ation. When overexpressed, enhanced cell proliferation, a process inhibited by GPC3. Acts also

eta/THRB involves at least in part the inhibition of THRB binding to triiodothyronine response el

5'-3' exonuclease activity on nicked or gapped double-stranded DNA, and exhibits RNase H a  
recruitment of GRB2, GAB1, PIK3R1 and SOS1, and mediates activation of RAS, MAPK1/ER

eration of normal fibroblasts (in vitro). Has very high affinity for VEGFA and relatively low protei

ILCP-1, TARC and also for the malaria parasites *P.vivax* and *P.knowlesi*. May regulate chemok

and its assembly into elastic fibers.

of lysosomes, causing degradation of mature CTSD by CTSB (PubMed:28073925). In addition

regulates protein synthesis by controlling the activity of initiation factor 2B (EIF2BE/EIF2B5) in the

lymphocyte activation.

where carries the 2,3-enoyl-CoA hydratase and the 3-hydroxyacyl-CoA dehydrogenase activities  
hydratase and the 3-hydroxyacyl-CoA dehydrogenase activities, while the trifunctional enzyme sub  
ethylates TSHZ3 and regulates its transcriptional repressor activity. Deacetylates 'Lys-310' in RE

transcriptional coactivators such as CREBBP and EP300. Activity is enhanced by interaction with  
A-A\*01:01-restricted peptides carry a post-translational modification with oxidation and N-termir  
V-4 EBNA3 (QAKWRLQTL), eliciting cytotoxic T cell response.||Allele B\*13:02: Presents multip

binding of HNRNPC, leading to regulation of mRNA splicing (PubMed:25719671).

whereby affects neural activity, nociceptive processing, pain perception, mood and behavior. Besides  
activator activity of the CLOCK-ARNTL/BMAL1 heterodimer.

of the JAK-STAT pathway (By similarity).



mplex, thereby playing a key role in differentiation of embryonic stem cells and normal development and can function as weakly inward rectifying potassium channel (PubMed:8605869, PubMed:8605869).

iently phosphorylates and inactivates the actin binding/depolymerizing factors cofilin-1/CFL1, cofilin-2/CFL2, and cofilin-3/CFL3.

complex N-glycans, plays an important role in the activation of cellular signaling pathways, regulation of cell growth, and cell adhesion.

extracellular matrix proteins, can also act on several nonmatrix proteins such as biglycan, decorin, fibronectin, laminin, and perlecan.

cells (PubMed:11447109). May act as a regulator of F-actin dynamics (By similarity). As part of the Arp2/3 complex, it is involved in the formation of the actin nucleation site.

mbinations act as transcriptional activators or repressors, respectively. NF-kappa-B is controlled by I-kappa-B. I-kappa-B is involved in the regulation of self-renewal of liver cancer cells (PubMed:25985737).

y contributes to cutaneous wound healing.

olasm. Isoform PML-6 shows restriction activity towards human cytomegalovirus (HCMV) and is

located in the mitochondrion (PubMed:18838687). Dephosphorylates heat shock protein HSPB1 (By synthesis by oligomerising short RNA primers on both leading and lagging strands (PubMed:17893744). The AMPK complex assembles, via its C-terminus that bridges alpha (PRKAA1 or PRKAA2) and

gamma subunits, and/or by up-regulating CDKN1A, which facilitates active cyclin-dependent kinase (CDK) c

yclin-dependent kinase (CDK) activity. TGF-beta proteins are themselves degraded. By acting on TGF-beta signaling, may regulate alpha-galactosidase (EC 3.2.1.23) and globotriaosylceramide by alpha-galactosidase A (EC 3.2.1.22). Site of mitochondrial-endoplasmic reticulum membrane tethering and modulates calcium ions shut

in vitro PtdIns(3,4,5)P3 > PtdIns(3,4)P2 > PtdIns3P > Ins(1,3,4,5)P4 (PubMed:26504226, Pub

Med:11252222). Regulates axon growth and neuronal cell proliferation, and normal heart development. Regulates axon growth and neuronal cell

transfer of a fatty acyl group at the sn-1 position of phosphatidylcholine (PC) and other glycerophospholipids and controls cell cycle G2/M checkpoints on DNA damage (PubMed:10764811, PubMed:10764811).

in of pancreatic PP (polypeptide-producing) cells. Regulates transcription by forming a heterodimer with p300.

mediate-early genes (PubMed:9770464, PubMed:10436156). In response to mitogenic stimulation, it phosphorylates and activates transcription factors such as c-Jun and c-Fos.

1694, PubMed:12117417, PubMed:12225859, PubMed:25998567, PubMed:30867591). The cytoskeleton and the onset of heart contractions.

mitotic chromatin remodeling mechanism occurs as neurons exit the cell cycle and become committed to a postmitotic state.

antiviral state. In response to type II IFN (IFN-gamma), STAT1 is tyrosine- and serine-phosphorylated and translocates to the nucleus.

Plays a role in the proteolytic processing of ACE2 (PubMed:24227843). Plays a role in hemostasis and thrombolysis.

The cytokine dimer results in the phosphorylation and the activation of TGFBR1 by the constitutive active TGFBR2 (PubMed:21240187). Plays an important role in podosome formation and associated function, thus regulating cell migration.

PP1 or TP53BP2/ASPP2 is displaced by PPP1R13L/iASPP (PubMed:12524540). In cooperation with p300, it represses transcription of p53 target genes.

NA changes. Its activity is regulated by transcription factors and cytoplasmic proteins that have  
d:17069755). Mediates estrogen action in various target organs (PubMed:22452784). Mediates  
e suppression of platelet aggregation in the vasculature. Highly expressed in the initial segment

NB2 channel activity (By similarity). Binds NADPH and has NADPH-dependent aldoketoreduct  
ey role in the antiproliferative action of IFN-gamma either by inhibiting the ERK activation or by

nd may regulate signal transduction in different cellular processes (Probable). Indirectly regulat  
PubMed:28730546, PubMed:30184494). Participates as well in degradation of mitochondrion-  
-

followed by recruitment of RNF146 and subsequent ubiquitination (PubMed:21478859). Media

idymal maturation and the acrosome reaction. May play a role in sperm-egg binding through its

NA12 (PubMed:22238662). Plays a role in the maintenance of hematopoietic stem cells and/or

membrane fission events, such as the terminal stages of cytokinesis and enveloped virus budding.  
clock gene ARTNL/BMAL1 and the genes involved in lipid metabolism in the liver (By similarity).  
PubMed:24440334).

leads to the Ras activation through the G(s)-alpha signaling pathway. Involved in the cAMP-induc

l). Plays an essential role in the development of lymphoid tissue-inducer (LTi) cells, a subset ne

modulator of TGF-beta-signaling by restricting substrate specificity of RNF111 (By similarity). F

s its deacetylation (PubMed:28167758). In association with RARA, plays a role in the repressio

tes integrin beta5/ITGB5 and thus regulates cell motility. Phosphorylates ARHGEF2 and activa

› apoptosis by caspase activation and in p53-independent manner.

› neurite elongation, while isoform 1 may promoter neurite branching.

› se RHEB (PubMed:20381137, PubMed:25936802). Involved in the RCC1/Ran-GTPase pathw:

› ig with AICD for APBB1-binding. May modulate calcium-mediated postsynaptic signals (By sim

1 complex, required for BDNF-NTRK2 endocytic trafficking and signaling from early endosome ones and promotes degradation of histones, thereby participating actively to the exchange of h

ocks the recruitment of the 43S ribosomal complex. Involved in methylation of rRNA. (PubMed:30220460). Endosome membrane fission of early and late endosomes is essential to (PubMed:22891260).

2 ubiquitination and proteasomal degradation thereby regulating phosphatidylinositol 3-kinase s

1 an HSV-tk promoter.

ates ubiquitination of MAP4K1/HPK1: recognizes and binds autophosphorylated MAP4K1/HPK

strates at multiple levels: by interacting with APC and blocking access of APC substrates to the

ntiation of lung epithelium. Acts cooperatively with FOXP4 to regulate lung secretory epithelial c

ding Xist RNA and recruiting the WMM complex, which mediates m6A methylation, leading to t

ing with CUL1 and thus inhibiting NF-kappa-B inhibitor alpha/NFKBIA degradation that remains

029197). Represses hypoxia inducible factor's (HIF) activity by interacting with HIF prolyl hydro:

ired for disassembly and recycling of post-termination ribosomal complexes and subsequently  
AMP, ADP and ATP, leading to activate or inhibit AMPK: AMP-binding results in allosteric acti

nucleotides over CpH (H=A, T, and C), hemimethylated-CpG and hemimethylated-hydroxymetf

eta-catenin signaling pathway. Binds to and phosphorylates TCF7L2/TCF4 and LEF1, promoti



generation of bradykinin in the kidney.

glia, olfactory epithelium and cranial skeleton. Plays a role in several important steps of muscle and forms of Ran between the cytoplasm and nucleus. Its compartmentalized phosphorylation c

and tissue cell membranes is the antigen Pk of blood histogroup P (PubMed:10747952).  
tal lung development (By similarity).

CLNS1A from the trapped Sm proteins and their transfer to an SMN-Sm complex triggers the

homologous recombination (PubMed:20603073, PubMed:26807646). Plays a key role in contro

kungunya virus (CHIKV), herpes simplex virus type 1 (HHV-1) and human adenovirus (PubMec

em to be of low affinity and retromer SNX proteins may also contribute to cargo selectivity thus s phosphatidylserine (PS) and to a lesser extent phosphatidylethanolamine (PE). The ATP8A1

on, and thereby plays a role in stress-induced cell cycle arrest (PubMed:23375502). Also acts  
phosphatidylinositol (LPI) into phosphatidylinositol (By similarity).

d the peripheral clocks that are present in nearly every tissue and organ system. Both the cent  
17, a cargo essential for the homeostatic maintenance of numerous cell surface proteins assoc  
e the ILV is released. The ESCRT machinery also functions in topologically equivalent membra  
U-linked ubiquitination of RIPK1 (PubMed:29883609).

cium-binding protein also transiently associates with immature PCSK6 and regulates its secreti

cifically in the G1/S checkpoint (PubMed:25123532). Reduces neuronal cell survival (PubMed:

likely that of ER biogenesis-related genes (By similarity). In a neuroblastoma cell line, protects c

er by competing for the binding to E-box elements (5'-CACGTG-3') found within the promoters c

ns (E2F1, E2F2 and/or E2F3). Required for placental development by promoting polyploidizatic

lcium responses (PubMed:23056385). Required for store-operated Ca(2+) entry (SOCE) and c

egative regulator of the canonical Wnt signaling pathway through preventing ubiquitination of b

rin ITGA5:ITGB1 and to a lesser extent ITGAV:ITGB3 and ITGAV:ITGB5 (By similarity). May n

PubMed:23401855). However, may play a non-essential for DNA replication: may be involved in t

cooperation with nuclear PKC. Overexpression up-regulates the Erk signaling pathway and prolif

PubMed:21909076, PubMed:22615920). Acts as a key regulator of angiogenesis by controlling v

present in all Gram-negative and some Gram-positive bacteria: ADP-Heptose is recognized by Al

invertase (PC)-mediated cleavage proteolysis (PubMed:23132852). May also have the ability to

galactose over glucose (PubMed:12753898).

the rapid formation of a branched actin network by first nucleating new mother filaments and the

phosphorylation by TBK1 on the pLxIS motif leads to recruitment and subsequent activation of t

retroviral effects in infected target cells. Selectively targets single-stranded DNA and does not

57036).

is a role in the maturation of phagosomes that engulf pathogens, such as *S.aureus* and *M.tube*

protein synthesis inhibitor, leading to a global attenuation of cap-dependent translation, and the Notch signal, preventing expansion of the Notch signal into the anterior somite domain (By

PubMed:29915238). Acts as Fe(2+) and 2-oxoglutarate-dependent monooxygenase, catalyzing RNA-induced silencing complex (RISC), which recognizes target mRNAs through imperfect base

activin receptors whereas the type-1 receptors like ACVR1B act as downstream transducers of

apoptosis via its interactions with CD6 (PubMed:15294938, PubMed:16352806). Mediates homotypic

ts after ionizing irradiation in both the S-phase and the G2 phase of the cell cycle. Involved in tr  
o after strand invasion at replication-dependent DNA double-strand breaks; together with PALB  
ation and promotes anergy. In B-cells, acts by ubiquitinating SYK and promoting its proteasome

more proteins. Probably necessary for normal neurologic development.

: capping activity is auto-inhibited and inhibition is relieved upon ABI1 interaction. Also shows a

terminal phosphorylation.

), PubMed:19965638, PubMed:20123072). Involved in V(D)J recombination by acting as a cof

adults, involved in glucose metabolism in adipose tissue, skeletal muscle and liver (Probable).

46591, PubMed:16979567, PubMed:20049431). Found in an inactive form in the cytoplasm of  
ing of the agonist hormone 17-beta-estradiol (E2). Increases the binding activity of charybdotox



: cochlea and induces cells apoptosis.

to precursor Z to generate a dithiolene group.

s with normal sodium channel clusters. Required, together with GLDN, for maintaining NFASC

mutation (SHM) by targeting AICDA deamination activity to transcribed dsDNA substrates. In th  
s. Component of the PSAP complex which binds RNA in a sequence-independent manner and

ie RPB4-RPB7 subcomplex binds single-stranded DNA and RNA (By similarity). Binds RNA.  
protein degradation. This type of proteolysis is required in several pathways including spermat  
gap flaps of distinct sequences and lengths; and DNA ligase I (LIG1) on long-patch base excisi

recruitment of the DNA double-strand break repair factors RAD51 and RAD52 to chromatin, in addition to the severity of the disease has been found. As is typical for genes encoding ribosomal proteins, the mutation of this gene is associated with a severe form of ribosomopathy.

ROMK1, KCNA1-5, KCNQ1-5 and KCNE1, epithelial Ca(2+) channels: TRPV5 and TRPV6 (PubMed:22020124).

Regulation and destruction of CDH1 in a CK1-Dependent Manner, thereby regulating cell migration. (PubMed:190923). Plays an important role in L-glutamate and L-aspartate reabsorption in renal tubuli (PubMed:1190923). Plays an important role in osteoclast syncytialization, the spontaneous fusion of their plasma membranes, an essential process for bone resorption. Also involved in the regulation of the plasma membrane in conjunction with cysteine string protein-alpha/DNAJC5 (PubMed:2079828).

(PubMed:146077). As part of the U7 snRNP it is involved in histone 3'-end processing (PubMed:129753).

Involved in the regulation of the exocytosis of insulin in pancreatic beta cells (PubMed:23091057). Plays also an important role in the exocytosis of insulin in pancreatic beta cells (PubMed:23091057). Plays also an important role in the exocytosis of insulin in pancreatic beta cells (PubMed:23091057).

F7L2 target genes.

Complex with TLR6, promotes sterile inflammation in monocytes/macrophages in response to oxidized low-density lipoprotein (oxLDL). TP5 is an immunomodulating pentapeptide.

A phosphodiester backbone. As an essential component of the RMI complex it is involved in chromosome segregation.

Acts as an 3'-untranslated region (UTR) ARE mRNA-binding adapter protein to communicate signal to the 3'-UTR ARE binding protein (AUF1).

); additional evidences are however required to confirm this result in vivo (PubMed:29463709).  
tyrosine in fibroblasts (Probable). May mediate blood-to-retina L-leucine transport across the inr

mediators from the milieu, regulating signal transduction in different cellular processes (PubM

3 promotes TIPIN nuclear localization (PubMed:17141802, PubMed:17296725). Involved in cel

. damage response: phosphorylates p53/TP53 at 'Ser-15' and 'Ser-392' and is recruited to the (

ubiquitin on CRLs targets (PubMed:27565346). The functional specificity of the E3 ubiquitin-protei  
agosome-lysosome fusion and completion of autophagy (PubMed:30538141). Involved in the I

; functionally with RORA for the regulation of genes involved in liver metabolism (By similarity).

erases (LPLATs) catalyze the reacylation step of the phospholipid remodeling pathway also known as the Landsman cycle. It is also known for mediating its growth factor-independent degradation. Involved in the degradation of the inhibitory

protein. Required for CDK5RAP2, CEP152, WDR62 and CEP63 centrosomal localization and promotion of

OLD4. They exhibit differences in catalytic activity. Most notably, Pol-delta3 shows higher proofreading activity, a mutation frequently observed in tumors. Also involved in deuterosome-mediated centriole amplification

(PubMed:20129055, PubMed:24065767). Specificity of the HBO1 complexes is determined by

response to endoplasmic reticulum stress, acts as a phosphodiesterase by mediating removal of 5' caps from mRNAs in the

mutagenesis (SHM) by targeting AICDA deamination activity to transcribed dsDNA substrates. In the

1 to sites of DNA damage and the PAGR1:PAXIP1 complex is required for cell survival in resp

actin flow during actin-dependent nuclear movement. May be involved in nucleus-centrosome ;

mutation (SHM) by targeting AICDA deamination activity to transcribed dsDNA substrates. In th  
ochondrial membrane permeabilization but does not require other caspases. May also act as a

684971).

d for normal Na(+)-dependent intestinal nutrient uptake.

has been called mitochondrial ribosomal protein S35 in the literature. [provided by RefSeq, Jul ;

vided by RefSeq, Jul 2008]

λ) DNA is significantly enriched in exonic regions and is associated with gene transcriptional activity in stem cells, ultimately affecting neuron pool and cortex size (By similarity). Seems to have lineage-specific function as an activator of hormone-dependent transcription mediated by nuclear receptors.

belongs to the ribosomal protein S18P family. The encoded protein is one of three that has significant

lncRNAs, necessary and sufficient to promote neural stem cell self-renewal. Does so by directly binding to

(By similarity).

Its by promoting degradation of JAK1, probably by ITCH- and NEDD4L-mediated ubiquitination

is centriolar microtubule wall during early S phase in a PLK4-dependent manner (PubMed:2718

acts as an autocatalytic E2-like enzyme, catalyzing the conjugation of ATG12 to itself, ATG12 (



sors of membrane lipids and lipid mediators.

tion. Plays a role in apoptosis negative control involved in brain development.

heavy-chain (Igh) locus independently of the MLL2/MLL3 complex (By similarity). Involved in both

and regulation of telomere length. May participate in regulation of higher-order chromatin organi-

CLNS1A from the trapped Sm proteins and their transfer to an SMN-Sm complex triggers the

CLNS1A from the trapped Sm proteins and their transfer to an SMN-Sm complex triggers the

PHP4 in this function (PubMed:22654112).

ing that this disaccharide serves as the substrate recognition motif.

Holliday junctions (HJs). Resolves HJs by generating two pairs of ligatable, nicked duplex produ

). Binds to and stabilizes centriolar microtubule (PubMed:27185865).

r drugs also promote ubiquitination and degradation of RBM23 and PRPF39 (PubMed:316938)

osomal degradation (By similarity). By controlling the steady-state expression of the IGF1R recep

somal degradation (PubMed:22573887).

(PubMed:19289083). Affinity for microtubules is synergistically enhanced in the presence of the presence of the ndc-80 complex and may allow the ndc-80 complex to track depolymerizing n

development of obesity (By similarity).

ADE1 and promotes its translocation to the nucleus leading to cooperative inhibition of canonic

pre-tRNA splicing and pre-mRNA 3'-end formation, suggesting that the endonuclease subu

g the completion of cilium removal in the later stages of the cell cycle (PubMed:26290419).

erizes on the HJ and the first nick occurs upon dimerization at the junction (PubMed:26578604

ration and effector function. In dendritic cells involved in endosome-to-membrane recycling of r

RNA-induced silencing complex (RISC), which recognizes target mRNAs through imperfect bas

RNA-induced silencing complex (RISC), which recognizes target mRNAs through imperfect base pairing. Nuclear import is thought to be conferred by an asymmetric distribution of the GTP- and GDP-bound

and less towards RHOA. Essential for the early stages of embryogenesis. May play a role in regulat

UBE2D3. In cooperation with TAX1BP1 promotes ubiquitination of UBE2N and proteasomal degradation of receptor. Phosphorylated STATs then form homodimer or heterodimers and translocate to the nucleus

chromosome congression and is essential for the end-on attachment of the kinetochores to spindle

ulates local microtubule nucleation (PubMed:26165940).

guanine and inosine monophosphate and adenylosuccinate that prevents cytoplasmic acidification and HIV-1 gene expression. Isoform 2 and isoform 3 may be involved in apoptosis.

positive regulation of cyclins, including CCNE1, CCND1 and CCNB1 (PubMed:24854087). During DNA replication after DNA damage and promote postreplication repair: Monoubiquitinated PCNA le

RNA-induced silencing complex (RISC), which recognizes target mRNAs through imperfect base

the recruitment of CPC to centromeres during early mitosis via association with histone H3 ph

ane trafficking, or cell signaling during hematopoietic maturation (PubMed:10995579).

ivation of caspase-9 which prevents induction of apoptosis (PubMed:15735003).

22665479, PubMed:17418785). May be activated by muramyl dipeptide (MDP), a fragment of l

complex may recruit ARL8B and couple lysosomes to microtubule plus-end-directed kinesin m

F1 complex mediates down-regulation of BIRC5/survivin; the process requires the E3 ligase ac

f polarity information during tissue morphogenesis and/or in differentiated tissues.

RNA-induced silencing complex (RISC), which recognizes target mRNAs through imperfect bas

637).

ors, including the B-cell receptor, CD79A, CD79B, CD5, CD19, CD22, FCER1, FCGR2, FCGR3, phospholipase C (PLC) and the formation of inositol 1,4,5-trisphosphate (PubMed:19306925). S

of the neocortex. Involved in cerebral cortex growth (By similarity). Acts as an oncogene for pr



n of the protein (By similarity). Was originally reported to contribute to oxidative stress resistance (PubMed:16488400, PubMed:16707096).

Association with RASA1, resulting in recruitment of ARHGAP35 to the cell periphery where it inhibits RAS signaling for cerebellar development (PubMed:24766809, PubMed:24766810). Component of the pre-m

of genes involved in the response to oxidative stress by facilitating the SQSTM1-mediated autophagy.

e pairing with the miRNA and most commonly results in translational inhibition or destabilization of the target mRNA.

steps of the ATPase cycle, but they also have an individual specificity such that one co-chaperone binds to the substrate protein and facilitates its folding, while the other binds to the substrate protein and facilitates its unfolding.

PMID:17085480). CDKN1A/p21(CIP1) degradation during S phase or following UV irradiation is essential for cell cycle progression.

steps of the ATPase cycle, but they also have an individual specificity such that one co-chaperonin is specific for each step.

PMID:22138752). Stimulates proliferation of melanocytes.

of FRS2 triggers recruitment of GRB2, GAB1, PIK3R1 and SOS1, and mediates activation of PI3K. Contributes to genomic stability by preventing telomere dysfunction.

pairing with the miRNA and most commonly results in translational inhibition or destabilization of the target mRNA.

in EZR. Affects EZR-dependent signaling events, leading to increased activities of the MAPK cascade.

ending (PubMed:7957066, PubMed:14506133). Acts as a transcriptional coactivator (PubMed

ere identity through replication and cell division (PubMed:15475964, PubMed:15282608, Publ

al tracker of dynamic microtubule tips; after chromosomes have congressed, continues to play  
and hence cell cycle progression, via its C-terminus. Has a potential role regulating skeletal my

1 negatively regulating pericentromeric heterochromatin transcription (By similarity). SNAI1 recr

e pairing with the miRNA and most commonly results in translational inhibition or destabilization

ase and G1/S transition checkpoint by phosphorylating CDC25A, p53/TP53 and p73/TP73. Ph

e pairing with the miRNA and most commonly results in translational inhibition or destabilization

architecture (By similarity). In the course of podocyte injury, shuttles into the nucleus and acts as a transcription factor (PubMed:20798892). Has only a low DNA repair activity by itself which is stimulated by RAD23B and p53/TP53 signaling (By similarity). Receptor for amyloid beta peptide. Contributes to the transcription of vimentin (VIM), an intermediate filament (IF) protein. In epithelial cells, associates with a

activation of NF-kappa-B in response to TNF signaling leading to IL17 secretion (PubMed:2057721)

/BMAL1 heterodimer mediated transcriptional activation of PER1. The heterodimer ARNT:AHR

ion (PubMed:21986499). Inhibits cancer cell proliferation and may act as a tumor suppressor.

uron development. Binds to ERBB4 (PubMed:10867024, PubMed:7902537). Binds to ERBB3

the response element. Binds as a monomer to a response element composed of the consensu

ociation with the ACD:POT1 complex thus interfering with its telomerase stimulation activity. Tr

ne secretion and autophagy (PubMed:23991106).

tivity independently of kinase activity, via its interaction with NSF that disrupts the interaction b

g; the oral intake of apelin in the colostrum and the milk might therefore modulate immune res

amer), involved in the formation of a functional kinetochore outer plate, which is essential for ki

↗ regulator of cell proliferation by specifically activating expression of ARF, a tumor suppressor

By similarity).

tion (PubMed:16126907, PubMed:17998805, PubMed:19694616, PubMed:20416395). May ac

on with other hepatocyte transcription factors. Key regulator of cholesterol 7-alpha-hydroxylase

degradation of DYRK2 in nucleus. Ubiquitinates IGF1R and SNAI1 and promotes them to prote

a negative regulator of monocyte adhesion via the LYN kinase. Stimulates migration of monoc

ucose transporter SLC2A1/GLUT1 (PubMed:28383716). Plays a role in replication-dependent I

pendent antigens and for normal induction of germinal center B-cells. May also be involved in  
Associates with chromatin to the CDC25B promoter (PubMed:22132193).

ceptors (NLRs) and RIG-I like receptors (RLRs), collectively referred to as pattern recognition rec

e pairing with the miRNA and most commonly results in translational inhibition or destabilizatio  
in protein degradation via the proteasome; Lys-63-linked is involved in endocytosis, DNA-dam

ORR, p73/TP73, TPT1, WEE1 and HNRNPU. Plays a key role in centrosome functions and the ability to retain abscission-competent VPS4 (VPS4A and/or VPS4B) at the midbody ring until abscission. Regulates the mitotic entry of skeletal progenitor cells in response to lipid availability: when lipids levels are low, it inhibits mitotic entry.

In the input component, contributes to the regulation of a variety of liver clock genes. In the output component, contributes to the regulation of a variety of liver clock genes. Upregulates the pro-endocrine factor NEUROG3 (By similarity). During myogenesis, may play a role during

myogenesis. Upregulates CDKN1A/p21 by downregulating MYC, a repressor of CDKN1A/p21. Can negatively regulate CDKN1A/p21.



molecules diacylglycerol and inositol 1,4,5-trisphosphate. KITLG/SCF acts synergistically with

e pairing with the miRNA and most commonly results in translational inhibition or destabilization. Double-strand DNA breaks, promotes p53/TP53 phosphorylation on 'Ser-46' and subsequent apoptosis.

e spindle-assembly checkpoint by regulating PLK1 kinetochore affinity. Isoform 3 plays a role i

atin organization (PubMed:24867636). It is however unclear whether it plays a direct role in ch

on with PRPF19; however, these results need additional evidences (PubMed:24718257).

ment. Activates AKT1 by phosphorylating it on 'Tyr-176'. Phosphorylates AR on 'Tyr-267' and

or derepression of neuronal genes and hearing (By similarity).||Transcriptional repressor which  
JV-DDB complex preferentially binds to cyclobutane pyrimidine dimers (CPD), 6-4 photoproduct

tively active TGFBR2. Activated TGFBR1 phosphorylates SMAD2 which dissociates from the r

ich as PPARA and UCP1.

leads to the production of the cellular signaling molecules diacylglycerol and inositol 1,4,5-trisph

family, impairs their association with C/EBP binding sites in the promoter regions, and inhibits

ion by melanocytes (PubMed:23999003). Involved in the regulation of TOR signaling (PubMed

ases and promote the polarization of macrophages toward the pro-inflammatory M1 phenotype

asm with the glucocorticoid receptor NR3C1 and contributes to RELA inhibition and repression

e pairing with the miRNA and most commonly results in translational inhibition or destabilization  
so localizes to euchromatic regions where it negatively regulates transcription possibly by impa

e pairing with the miRNA and most commonly results in translational inhibition or destabilization

By similarity). The blockage of the PDCD1-mediated pathway results in the reversal of the existing ubiquitination and proteasome-mediated degradation of AR, probably by recruiting NEDD4  
e pairing with the miRNA and most commonly results in translational inhibition or destabilization

interaction with and phosphorylation by LCK and interaction with the TCR/CD3 complex which re

ditions of oxidative stress in the presence of RAD51C and XRCC3. Also involved in interstrand

an inactive GDP-bound form prevents the association of RGS14 with centrosomes and is require

ed pairing with the miRNA and most commonly results in translational inhibition or destabilizatio

ns to downregulate downstream gene expression (PubMed:17603013). Plays a role in the regulation of hemato

cytotoxicity by associating with cytochrome C and interfering with apoptosome assembly. ||NAD-dependen

(By similarity).

e pairing with the miRNA and most commonly results in translational inhibition or destabilization and cause organ damage following inflammation (By similarity).

n of TP53, and thereby plays a role in regulating transcription of TP53 target genes (PubMed:1

l regulate chromosome segregation in a kinetochore-independent manner. Can phosphorylate

ociating with ZHX1. Required for DUX4 silencing in somatic cells (PubMed:27153398).

Disassembly of P-body and nucleolus is not regulated by DYRK3 (PubMed:29973724). Dissolutes and represses the cytomegalovirus enhancer.

Is involved in anti-viral response, such as IFN-alpha/beta, DDX58/RIG-I, TNFSF10/TRAIL, OAS1, and MDA5.

Involved in pre-tRNA splicing and pre-mRNA 3'-end formation, suggesting that the endonuclease subunits are involved in the processing of pre-tRNA and pre-mRNA.

Expressed on thymocytes and antigen-presenting cells, which plays an important role in natural killer T-cell development.

PLD6 is primarily found on the inner mitochondrial membrane, while PLD6 localizes to the outer mitochondrial membrane.

Involved in the canonical pathway, as PKC seems to be required for Wnt-mediated inactivation of GSK3.

Involved in the transmission of polarity information during tissue morphogenesis and/or in differentiated tissues.

miR-143 binds to the 3' UTR of the miRNA and most commonly results in translational inhibition or destabilization of the target mRNA.

phagy: following phosphorylation by ULK1, interacts with GABARAP and promotes autophagy (l  
ow substrates on dynamic microtubules while ensuring CPC docking to static chromatin (By sim

. Overexpression induces multinucleated cells, suggesting that it is required to accomplish normal  
may a role in the regulation of snoRNAs and mRNAs degradation. Acts also as a phosphatase; f  
ciated DNA repair.

the main diacylglycerol intermediate within the phosphatidylinositol turnover cycle (PubMed:197  
CARD3, PPP1R2, PLK1, RASSF1, TACC3, p53/TP53 and TPX2. Regulates KIF2A tubulin depc

DP-->ATP exchange, resulting in a discernible conformational transition that converts MutS alpt  
complex transformation is initiated by abstraction of hydrogen at carbon 13 (with S-stereochemi

avoc by resolving unrepaired lesions (By similarity). The polymerase acts by binding directly the



ate the expression of numerous cytokines, such as TNF, CCL2, CCL5, CXCL1, IL1A and IL10

e pairing with the miRNA and most commonly results in translational inhibition or destabilization

of TLR4 signaling and in the nuclear translocation of RELA/NF-kappa-B p65 and the secretion

development by promoting polyploidization of trophoblast giant cells. Also involved in DNA damage  
e pairing with the miRNA and most commonly results in translational inhibition or destabilization  
sing mitochondria ROS levels in a HK2-dependent manner through a mechanism that is independent

binding sequence within the ZBTB7B locus acting as transcriptional silencer and allowing for

developing epithelial tissues. Plays a role in centrosome disjunction by regulating the localization

transport during brain development (By similarity). Acts as an adapter that bridges the interactio

1982).

assembly of core snRNPs and their transport to the nucleus.

As either monomers or homodimers, depending on the nature of the response element. Bind

phorylation of CDC20 and MAD2L1. Plays an active role in chromatin condensation during the

e pairing with the miRNA and most commonly results in translational inhibition or destabilizatio

is in fat. Required for some cold-induced thermogenic responses, suggesting a role in metabol

target genes (PubMed:19489739, PubMed:29590092). The NFE2L2/NRF2 pathway is also activ

phorylation and subsequent innate immune response activation through the cGAS-STING path

gulates the expression of proteins such as IL1B and CXCL2 that are involved in inflammatory p

374).

levels of surface AMPARs in response to chronic changes in neuronal activity through synapti

lation. Acts as a negative regulator in the tumorigenesis of gliomas by down-regulating EPHA2

H1, HMGA1, HIVEP3/KRC, LMNA, LMNB, LMNC, LBR, LATS1, MAP1B, MAP4, MARCKS, M

acts on N-oleoyl ethanolamine phosphate/N-(9Z-octadecenoyl)-ethanolamine phosphate, a pot

(PubMed:20484466).||[Isoform Alpha-B]: More effective than isoform Alpha in transcriptional a

coupled receptors (GPCR), cytokine, chemokine and growth factor receptors, and mediates res

ary localization.

P2-containing vesicles to autophagic membranes (PubMed:24603492).

ARP1-dependent PARP9/BAL1-DTX3L-mediated ubiquitination promotes the rapid and specifi

interact with the specific client and the central chaperone itself (PubMed:29127155). Recruitm

posed to be required for the fusion of distal appendage vesicles (DAVs) to form the CV by rec

ersions depending upon the context. May play a role in hypermutation at immunoglobulin genes

14/LIGHT, delivers costimulatory signals to T cells, promoting cell proliferation and effector fur

1-SMAD5-SMAD8 complex. The regulation of chondrogenic differentiation is inhibited by NOG  
1, and CCL25 through internalization. Negatively regulates CXCR3-induced chemotaxis. Regul

ch as glycolysis. Typical potent antigenic metabolites are 5-(2-oxoethylideneamino)-6-D-ribitylar

ron-gamma can therefore redirect, in specific cells, the EPRS1 function from protein synthesis

ole-stranded RNA. Exhibits antiviral activity against simian immunodeficiency virus (SIV), hepat

naling pathway probably by association with TCF7L2 and preventing TCF7L2 and CTNNB1 as:

; (EMCV) and mingo encephalomyocarditis virus (ENMG). Can also detect other viruses such :

it p85 (PIK3R1/PIK3R2) and disrupting the association between PIK3R1/PIK3R2 and the cataly

ght junctions in the epidermis and is required for the normal barrier function of the skin. Require

ation.

electron donor. May play a role in adipogenesis.

a activation of the ATM kinase (PubMed:15064416). In telomeres the MRN complex may mod

stimulating ubiquitination of NF-kappa-B subunit RELA and NF-kappa-B degradation in a COM

s IRF3 and IRF7, activating transcription of antiviral immunological genes including the IFN- $\alpha$ p

izes and binds cyclic di-GMP (c-di-GMP), a second messenger produced by bacteria, and cyc



. Internalized arrestin-receptor complexes traffic to intracellular endosomes, where they remain  
mandibular condylar cartilage into chondrocytes.

Med:29858569). Mono-ADP-ribosylates STAT6; enhancing STAT6-dependent transcription (Pu

activity as well as its antiangiogenic activity with activation of production of antiangiogenic che  
nd marburg virus (MARV), togaviridae: sindbis virus (SINV) and Ross river virus (RRV). Specifi

erve. May act by regulating membrane trafficking and cellular morphogenesis via a complex th

milarity).

l:21211721).

13).

l in B-cell chemotaxis in response to CXCL13 and sphingosine 1-phosphate (S1P). Required for

recruitment of 53BP1/TP53BP1, UIMC1/RAP80, and BRCA1 to DNA damage sites (PubMed:23:

aling complex. Functions as an HDAC-dependent corepressor for a subset of GFI1 target gene

atches (PubMed:15448697, PubMed:16260596, PubMed:16407242, PubMed:16940174). Also

linal pigment epithelium (RPE) as a regulator of rod outer segments fragments phagocytosis. P

PK3R3; but also GRB2, PLCG1, LCK and PTPN11. Other downstream substrate candidates for  
activation as well as by interactions with other cofactors or corepressors. NF-kappa-B comple

ceptor is also essential for normal gonadotropin-released hormone physiology and for puberty. Th

CFTR. Involved in endocytosis of megalin/LRP2 lipoprotein receptor during embryonal develop

rol (PubMed:22627129).

ed for centrosome migration to the apical cell surface during early ciliogenesis. May be involved  
number and kinetic properties partly determine the characteristic frequency of each hair cell and th

lial cells and reduces vascular leakage (PubMed:14583458, PubMed:17068295). Upon heterol

nt of RNASEL (PubMed:21142819). In addition, it may also play a role in other cellular processes including transcription activation of SRY. Plays a role in controlling left-right patterning during embryonic development (PubMed:10555555). Interacts with CHIKV, Dengue virus, Sindbis virus (SINV) and Semliki forest virus (SFV).

PubMed:26924529). May play a role in late myogenic differentiation (By similarity).

MO ciliary trafficking and contributes to the sonic hedgehog (SHH) pathway regulation. Required for

the multipotent neural stem cells. The nBAF complex along with CREST plays a role regulating

membrane in order to mediate the translocation of lysosomal proteins from the cytoplasm to the Golgi apparatus. Regulates the location and activity of the cyclin D-CDK4 complex. Exhibits transcriptional corepressor activity

(By similarity). May bind directly to and mask the 'Thr-308' phosphorylation site in AKT1 (By similarity). Interacts with the voltage-dependent anion channel (VDAC) by binding to it and preventing the release of the caspase activator

kinases. Interacts with HIV-1 matrix protein and is packaged into virions and overexpression can

a tumor suppressor.

e sulfur donor for cluster synthesis, the iron-binding protein frataxin as the putative iron donor,

d cell proliferation/survival and chemotaxis, mast cell degranulation, immune cells homeostasis  
stages of prolonged stress to activate caspase-dependent proteolytic cleavage of BECN1 to te

α-B activation and cytokine production is probably a consequence of its role in TGF-beta-1 sign

by cooperating with TP53 (PubMed:16897187, PubMed:18223688).

ours. The CUB domain has mitogenic activity in coronary artery smooth muscle cells, suggestin

ealing of bone fractures. Positively regulates PDPK1 kinase activity by stimulating its dissociati  
rown to control the growth initiation of astrocytic processes in culture and to participate in trans

lation results in the induction and expression of NF-kappa-B and MAPK-responsive inflammatc

Negatively regulates its own expression and the expression of DBP and BHLHE41/DEC2 (PubMed:10811100) and bone marrow, helping to maintain the volume and strength of skeletal muscle and bone (PubMed:10811100).  
location and activity of the cyclin D-CDK4 complex (By similarity).

activity. Increases COX2 mRNA stability and inhibits COX2 mRNA translation in epithelial cells (PubMed:10811100).  
minin G-like domain 6 containing the evolutionary conserved neurexin alternative spliced segment (PubMed:10811100).  
double-stranded RNA. Exhibits antiviral activity against simian immunodeficiency virus (SIV), hepatitis B virus (HBV), and hepatitis C virus (HCV) (PubMed:10811100).  
protein inhibitor, preventing MHC class I/TAP association. Expression of TAP1 is down-regulated in tumor cells (PubMed:10811100).  
protein synthesis. mTORC1 phosphorylates EIF4EBP1 and releases it from inhibiting the elongation factor 4E (eIF4E) (PubMed:10811100).  
intracellular calcium ions and reduced cellular cAMP levels (PubMed:20228059). Binds bacterial lipopolysaccharide (LPS) (PubMed:10811100).

system controlling different steps of axonal guidance including the establishment of the corticos

MBTPS1 and S2P/MBTPS2. The released N-terminal cytosolic domain is translocated to the ni

AT signalosome propagates signal branching to three major signaling pathways, the calcium, th

ASP4 and CASP5 by suppressing their caspase-recruitment domain (CARD) oligomerization a

degradation of IRF3. Mediates the ubiquitin-mediated proteasomal degradation of IgG1 heavy ch

arrest target genes over proapoptotic target genes. May also regulate the ubiquitination and st

growth induction, tumor suppressor mediated growth arrest and replicative senescence, apopt

environment contributing to the development of basaloid skin tumors (By similarity). May act a

ation of the nAChR pentameric assembly in the endoplasmic reticulum. Shifts stoichiometry for

pathways (By similarity). Also involved in the degradation of long-chain dicarboxylic acids through

differentiation of naive CD4(+) T-cells into T-helper Th17 or regulatory T-cells (Treg): deacetylation pathway appears to require the sequential function of ESCRT-0, -I, -II and -III complexes. ESCRT-III

inhibits the function of dendritic cells that initiate T-cell responses. Mediates mitotic non-disjunction and chromosome instability

hydrolysis of ATP in three separate catalytic sites on the beta subunits (By similarity).



e pairing with the miRNA and most commonly results in translational inhibition or destabilization

cess outgrowth and the coordinate expression of genes encoding synaptic proteins. Exerts its r

e pairing with the miRNA and most commonly results in translational inhibition or destabilization

e in triggering pri-miRNA cleavage, whereas the heme-free DGCR8 monomer binds pri-miRNA

lation has been reported as a marker of malignancy in various cancers and seems to maintain

stem/progenitor cells to postmitotic neurons requires a switch in subunit composition of the np

2/M checkpoint activation; DNA-dependent ATPase activity is essential for this function (PubMed)

osphorylates RIN1, inducing RIN1 binding to 14-3-3 proteins YWHAB, YWHAE and YWHAZ a

/ a role in DNA repair by HR. Plays a role in regulating mitochondrial DNA copy number under c  
i vivo. Also involved in ubiquitination and subsequent degradation of VHL, resulting in an accur

itral and peripheral clocks can be reset by environmental cues, also known as Zeitgebers (Gerr

rnapses where it is recruited by beta-catenin and cadherin. Required to localize Kir2 channels,

: T-cell-mediated immune reaction by degradation of multiple mRNAs controlling T-cell activation

most further proteins binding downstream. Required for normal chromosome organization and  
e pairing with the miRNA and most commonly results in translational inhibition or destabilization

3 factor (F3) pre-mRNA in endothelial cells. Phosphorylates PAGE4 at several serine and threonine  
e pairing with the miRNA and most commonly results in translational inhibition or destabilization

3ZH2 complex may also serve as a recruiting platform for DNA methyltransferases, thereby linking  
ation of centrioles (PubMed:20852615).

e pairing with the miRNA and most commonly results in translational inhibition or destabilization

ilarity). Involved in the induction of T helper 17 cells (Th17) differentiation upon recognition of  
RBL1, RBL1 and RBL2) (By similarity). Facilitates TP53BP1 foci formation upon DNA damage at

pids, cholesterol esters and triglycerides (By similarity).

promoters and enhancers. Modulates genes that are essential in the maturation of the immune system. Transferred via the dinuclear copper A center (CU(A)) of subunit 2 and heme A of subunit 1 to the a

entral and peripheral clocks can be reset by environmental cues, also known as Zeitgebers (Gerritsma et al. 2004). In adrenal cells suggesting MAPK12 may inhibit cell proliferation while promoting differential

entral and peripheral clocks can be reset by environmental cues, also known as Zeitgebers (Gerritsma et al. 2004).

roblastoma cells (PubMed:23801752, PubMed:29968769). May play a role in homologous recombination

as PBX2) is proposed to be involved in the transcriptional activation of EPHA8 in the development of the eye. Located in the mitochondria (PubMed:21345788, PubMed:29917077).

e pairing with the miRNA and most commonly results in translational inhibition or destabilization and subsequently allowing antigen sampling, loading and presentation during T-cell activation. Ir

ge-dependent calcium-channels and modulates inositol phospholipid hydrolysis (PubMed:1007

e pairing with the miRNA and most commonly results in translational inhibition or destabilization

zes sn-2 arachidonoyl group from membrane phospholipids, providing the precursor for eicosa

nation and function, probably by mediating lipid transport (By similarity). Not required for centra

entral and peripheral clocks can be reset by environmental cues, also known as Zeitgebers (Gerr

o cilium shortening and thus decreases flow-induced signaling (By similarity). May be an ion-ch

(PubMed:29104511).

have been associated with this transcript, including cellular growth arrest and apoptosis. It has

along DNA in a 5' to 3' direction (PubMed:18499658, PubMed:22102414). The helicase activity

complex that serves as a platform for IRF3 phosphorylation and subsequent innate immune res

hydrolysis of ATP in three separate catalytic sites on the beta subunits (By similarity).

e pairing with the miRNA and most commonly results in translational inhibition or destabilizatio

JLK1 kinase complex and modulating its protein kinase activity (PubMed:27617292). Positively or DPF3/BAF45C subunits in neuron-specific complexes (nBAF). The npBAF complex is essei

e pairing with the miRNA and most commonly results in translational inhibition or destabilizatio

e pairing with the miRNA and most commonly results in translational inhibition or destabilizatio

e pairing with the miRNA and most commonly results in translational inhibition or destabilizatio

ys residues, but may prefer 'Lys-11'-, 'Lys-27'-, 'Lys-48'- and 'Lys-63'-linked polyubiquitination (l

tract anomalies. Altered expression of some gene family members is associated with several ty  
arbon-hydrogen bonds. Exhibits high catalytic activity for the formation of hydroxyestrogens fro

e pairing with the miRNA and most commonly results in translational inhibition or destabilizatio

in synaptic plasticity.

e pairing with the miRNA and most commonly results in translational inhibition or destabilizatio



enting synaptic depression.

e pairing with the miRNA and most commonly results in translational inhibition or destabilizatio



e pairing with the miRNA and most commonly results in translational inhibition or destabilization  
e pairing with the miRNA and most commonly results in translational inhibition or destabilization

activation. The CREST-BRG1 complex also binds to the NR2B promoter, and activity-dependent

may in a cell-autonomous manner through inhibition of cis DLL1-NOTCH2 interactions, which preclude  
proliferation and transcription, the ratio of mitochondria-to nuclear-encoded components of the elec

as the mammary mesenchyme to inhibit hair follicle formation within the nipple sheath (By simil

sferred via the dinuclear copper A center (CU(A)) of subunit 2 and heme A of subunit 1 to the a

chain. Thus, each immunoglobulin has two antigen binding sites with remarkable affinity for a p

its function in the nervous system, the interaction of EPHA5 with EFNA5 mediates communica

tion and sequesters BCL2 thus neutralizing its antiapoptotic activity.

3CA1, plays a key role in the maturation of glial-derived, nascent lipoproteins. Required for rem

romatin of promoters and enhancers of muscle-specific genes; this event correlates with hyperj  
to sites of double-stranded breaks (DSB) occurring during the S phase. RAD9A possesses 3'->

or for PDCD1/PD-1 (By similarity). Negatively regulates the proliferation, activation, effector fun

exchange. Apical membrane chloride-bicarbonate exchanger that mediates luminal chloride abs

migration. EPHB4-mediated forward signaling controls cellular repulsion and segregation from I

e pairing with the miRNA and most commonly results in translational inhibition or destabilizatio

s CSF-1 directed motility and phagocytosis through the modulation of RAC1 activity (By similar

enhancing their ligand affinity via conformational change (PubMed:23193172). Stimulates plas  
ed to be the major clathrin adaptors contributing the CCV formation. AP-2 also serves as a carg  
y have a role in amino acid transport by acting as binding partner of amino acid transporter SL

PubMed:28614294). Regulates RPS6KB1 signaling, which promotes endothelial cell senescence

r of the beta-interferon gene (PubMed:1851123). Drives the maturation of B-lymphocytes into I  
Required for the phosphorylation and activation of STAT3, a transcription factor involved in cell  
response to inhibition of ERAD-proteasome degradation system, resulting in cytochrome c rele  
PubMed:25106868, PubMed:14981510). Promotes ARE-containing mRNA decay of the low-den

mediated activation of SMAD2/3 by mediating the internalization of TGFBR1 from membrane raft:

h effectors include PKN2, the RhoGTPases RAC1 and RHOA, Rho-kinases and phospholipase

localization of phosphorylated PRKCZ, PARD3, TIAM1 and RAP1B to the cell junction (PubM

ation and production of cytokines and growth factors by T-cells that in turn stimulate epithelial ti  
microtubule dynamics, and thereby contributes to the regulation of cell proliferation, cell polariza  
actile state. Phosphorylates MYL12B in non-muscle cells leading to reorganization of actin cyto  
. Binds to the cyclin CCND2 promoter region. Associates with chromatin at the NF-kappa-B pro

platelet granule secretion pathways and aggregation. Also required for the formation of a dive  
ration and stimulates the formation of excitatory synapses. Upon activation by EFNB1, abolish

tor X. Regulates endothelial cell barrier integrity during neutrophil extravasation, probably follows; PubMed:2172980, PubMed:7923219, PubMed:10347120, PubMed:10455171, PubMed:1237

in growth factors to isoform 1 or isoform 2 leads to the activation of several signaling cascades; T. Promotes cell survival by phosphorylating AGAP2/PIKE-A and preventing its apoptotic cleav

c regeneration, gonadotropin-releasing hormone neuron survival and migration, platelet activat

sion and metastasis by activating RhoA/ROCK signaling pathway and up-regulating proinflamm

myocyte enhancer factor 2 (MEF2) leading to nuclear export of HDAC5 and allowing MEF2-mediated; y). Promotes cholesterol efflux by acting as a transcription coactivator (PubMed:19481530). Ac

of multiple endoderm-derived organ systems such as liver, pancreas, lung and prostate; FOXA'



ane redox state and enhancing cell migration (PubMed:21670307). Ligand for CD44; the intera

5959397). LOXL2-mediated deamination of TAF10 results in transcriptional repression of gene

have somewhat higher degrees of preference for kappa-receptors than for mu-receptors.||Lacto

ERK, PI3 kinase-AKT, or PLCgamma-PKC. The RAS-ERK activation is associated with the morp

with slightly lower affinity histone H3 crotonylated at 'Lys-18' (H3K18cr) (PubMed:27105114). Al

ral and peripheral clocks can be reset by environmental cues, also known as Zeitgebers (Germ

lar stomatitis virus (VSV), herpes simplex virus type 2 (HSV-2), and encephalomyocarditis virus

neuronal development.

at cleavage of the N-C-alpha bond, producing the alpha-amidated peptide and glyoxylate (Publ

ighboring viable leukocytes by transmitting a detachment signal (PubMed:12110892). Promote uptake of the synthetic drug alkylphospholipid perifosine. Involved in the microvillus formation i

Also plays a key role in the uptake of cholesterol from peripheral cells and tissues that is subse

idation of the apoptotic inhibitor MCL1. May be involved in the inflammatory response pathway

(By similarity).

in down-regulation of signaling cascades that lead to the activation of Akt and MAP kinases (E

g cells. Cooperates with EXOC2 to recruit other components of the exocyst to the early midbod

, or GSVs). These vesicles provide a stable pool of SLC2A4 and confer increased responsiven

17 producing helper T-cells (Th17) and the regulatory T-cells (Treg) to sites of inflammation. Re

hesion and migration processes at the endothelium (PubMed:9024663, PubMed:9177350).

ributing to organogenesis (By similarity).

tyrosine kinase (PTK) families. Receptor clustering or dimerization leads to recruitment of SR

i. Promotes ubiquitination and proteasomal degradation of MAP3K14.

ogenesis, cell-to-cell and cell-to-matrix interactions. They are required for instance in the prop

sequent phosphorylation of CFL1 which is important for lamellipodial F-actin regulation (By sim

anslation of a subset of mRNAs involved in cell proliferation, including cell cycling, differentiat

TTN downstream signaling in muscle cells. May regulate signaling cascades through ubiquitin:

ilar structures composed of oligomerized PYCARD dimers which form prior to inflammatory apc

ET complex is proposed to function as a Rab5 effector to mediate early endosome fusion prot

tor of PRC2 activity by bridging the pre-existing histone H3K27me3 and newly recruited PRC2

ose level seems to influence the beta-cell death or survival response. Acts as a scaffold protein

amage (PubMed:25861989). May control negatively TRAF2-mediated NF-kappa-B activation s

ved:20881139). Plays a role in integrin-mediated cell adhesion through BCAR1-CRK-RAPGEF

complex with TLR4, promotes sterile inflammation in monocytes/macrophages in response to oxi

and tumor cells (PubMed:20962267). In lymph nodes (LNs), controls fibroblastic reticular cells (not involved in the nucleocytoplasmic export of unspliced (CTE)-containing RNA species accor

PubMed:19060897, PubMed:20930030, PubMed:17053788). Is thought to provide a link to the ml

cell migration (PubMed:15184888). May modulate the activity of RAC1 and CDC42 (By similar

PubMed:11106, PubMed:23364794, PubMed:25038827, PubMed:26101257, PubMed:22056990, PubMed:30026314). Binds to the glycosaminoglycans heparin, heparin sulfat

13).

PubMed:20505359, PubMed:28561066). Binds and is activated by phosphatidylinositol 3-phosphate

ys a role in signaling cascades triggered by stimulation of T-cell receptors, in the adaptive immu  
cter in the assembly of the inflammasome which activates caspase-1 leading to processing and  
st and apoptosis through direct interaction, preventing its MDM2-dependent ubiquitin-mediated  
us and play a role in regulating gene expression upon cell stimulation. Isoform 3 is not function

ulation. Has lower affinity for membranes enriched in phosphatidylinositol 3-phosphate.

differentiation and neurite outgrowth mediated by NGF via its effect on mTORC1 activity. Requi  
zyme under normoxia and, through regulating the stability of HIF1, involved in various hypoxia-i

R2. Plays a role in myogenic differentiation.

nanner (By similarity).||[Isoform B]: Mainly function in endothelial cells and vascular smooth mu

1 binds to the cholesterol in the PM and facilitates its transfer from the PM to ER (By similarity).

as a potential tumor suppressor by positively regulating PHLPP1 stability (PubMed:24145035).

I of SMAD1 protein and a smaller decrease of SMAD2 level. Negatively regulates TGFB1-induc



of BACH1 (PubMed:24035498, PubMed:30190310). The SCF(FBXL17) complex is also involved

in the maturation of BACH1 to its fully-active form (PubMed:24660806, PubMed:24751536, PubMed:24784582, PubMed:

11268217) secretion to maintain integrated homeostasis. Phosphorylates NEDD4L. Acts as a scaffold to

form 3]: Functions as transcription repressor; its activity is marginally lower than that of isoform

11268217) secretion to maintain integrated homeostasis. Phosphorylates NEDD4L. Acts as a scaffold to

dent-B-cell development (PubMed:11268217). Binds to A/T-rich promoters (PubMed:11268217).

endoplasmic reticulum turnover (PubMed:31006538, PubMed:31006537).





and inositol hexakisphosphate (InsP6). Binding of these highly phosphorylated inositol phosph

urated very long-chain ceramides and short-chain ceramides are poor substrates (PubMed:200

or complex that induces the phosphorylation and activation of MUSK. The activation of MUSK

processes such as BCAR1, CRK, CRKL, DOK1, EFS or NEDD9. Phosphorylates multiple rec

5, PubMed:23474458, PubMed:26980435).

er greater susceptibility to many types of cancer. This gene encodes a mitochondrial isoform, v

tion in vitro (PubMed:28893863).

th TSHZ3, SET and HDAC factors as a transcriptional repressor, that inhibits the expression of  
illar matrix and may regulate neurite outgrowth in the brain.||Functions as a cell surface recepto

ting is proposed to involve a combinatorial readout of histone H3 modifications (specifically me

rowth and morphology. Major regulator of synaptic transmission and plasticity at adult synapse

in spermatogenesis, embryo implantation, neural network formation and tumor progression. St  
er monkey virus (MPMV), human T-cell leukemia virus type 1 (HTLV-1), Rous sarcoma virus (R

\_F2 to transactivate the BLK promoter (PubMed:10207087, PubMed:14970218). Inhibits KAT6

ast in astrocytes, changes in patterns of gene expression, changes in the actin cytoskeleton in  
riptional activator activity but has no effect on MYC transcriptional repression. Binds to TOP1/

erone-client complex and subsequent lysosomal or proteasomal degradation (PubMed:215057

sembly and inhibit actin branching by competing with the Arp2/3 complex for binding to actin fil

and endonuclease activities. While the ATPase and endonuclease activities are well-defined a  
o as a serine exopeptidase with a dipeptidyl peptidase activity that regulates various physiologi

ements (TREs) by NR2F6. Inhibits NFATC transcription factor DNA binding and subsequently i

ctivity. Also involved in replication and repair of rDNA and in repairing mitochondrial DNA.  
K2, MAPK3/ERK1 and the MAP kinase signaling pathway, as well as of the AKT1 signaling pa

n kinase activity; may function as a negative regulator of VEGFA signaling by limiting the amou

ine bioavailability and, consequently, leukocyte recruitment through two distinct mechanisms: v

, functions as wound-related growth factor that acts directly on dermal fibroblasts and endothel

same manner as glycogen synthase. In Wnt signaling, GSK3B forms a multimeric complex with

while the trifunctional enzyme subunit beta/HADHB bears the 3-ketoacyl-CoA thiolase activity  
unit beta/HADHB described here bears the 3-ketoacyl-CoA thiolase activity (PubMed:8135828  
ELA and thereby inhibits the transcriptional activity of NF-kappa-B. Deacetylates NR1D2 and at

both, NCOA1 or NCOA2. Interaction with redox regulatory protein APEX seems to activate CT,  
nal acetylation being the most frequent (PubMed:25880248). Fails to present highly immunoge  
ole HIV-1 epitopes derived from gag (RQANFLGKI, GQMREPRGSDI), nef (RQDILDLWI), gag-

es, plays a role in vasoconstriction of cerebral arteries.

ment. In cardiac cells, it is required to repress expression of cyclin-D1 (CCND1) by activating n  
978667, PubMed:15820677, PubMed:21653227, PubMed:22431633, PubMed:23169818, Pub

ofilin-2/CFL2 and destrin/DSTN, thereby preventing the cleavage of filamentous actin (F-actin),

rganization of the actin cytoskeleton, cell-cell adhesion and cell migration. MGAT5-dependent l

il 1 and beta-type CGRP promoting vasoconstriction. Also cleaves KISS at a Gly-|-Leu bond. A

f the DISP complex, may regulate the association of septins with actin and thereby regulate the

d by various mechanisms of post-translational modification and subcellular compartmentalizati



influenza A virus strains PR8(H1N1) and ST364(H3N2). Sumoylated isoform PML-4 and isoform

nilarity). Dephosphorylates and activates transcription factor NFATC1 (PubMed:19154138). In 144). These primers are initially extended by the polymerase alpha catalytic subunit and subsequent gamma subunits (PRKAG1, PRKAG2 or PRKAG3).

complex formation in glioma cells. In intestinal cells stimulated by the phorbol ester PMA, can tr

many physiological processes, including retinal angiogenesis and neuronal survival and maturation. Apoptin-B forms a solubilizing complex with the substrates of the sphingolipid hydrolases. Saponin titling between ER and mitochondria (PubMed:21285369).

Med:16824732). The lipid phosphatase activity is critical for its tumor suppressor function. Antic

cell migration, axon branching and synapse formation; required for normal development of the ne



has been shown to abrogate or completely inhibit YY1-mediated activation or repression. For example, it is involved in the ubiquitination and subsequent proteasomal degradation of ZFHX3 (PubMed:22452784). It is expressed in the testis of the epididymis, where it affects the functional expression of clusterin and phospholipid hydroxylase activity (By similarity). Has broad substrate specificity and can catalyze the reduction of methylglutathione, arresting cell growth in G1 phase in a p53-dependent manner. Acts as a positive regulator of cell cycle progression, for instance, cell cycle G1/S phase transition through its phospholipid phosphatase activity associated cytosolic rRNAs (PubMed:30385512). It mediates PARsylation of TERF1, thereby contributing to the regulation of telomere length (PubMed:15125442). It contains a disintegrin domain.

ase activity (By similarity). Has broad substrate specificity and can catalyze the reduction of methylglutathione, arresting cell growth in G1 phase in a p53-dependent manner. Acts as a positive regulator of cell cycle progression, for instance, cell cycle G1/S phase transition through its phospholipid phosphatase activity associated cytosolic rRNAs (PubMed:30385512).

es, for instance, cell cycle G1/S phase transition through its phospholipid phosphatase activity associated cytosolic rRNAs (PubMed:30385512).

tes PARsylation of TERF1, thereby contributing to the regulation of telomere length (PubMed:15125442).

; disintegrin domain.

leukemia stem cells in bone marrow niche (By similarity). Plays a critical role in cancer progres

ng (HIV-1 and other lentiviruses). VPS4A/B are required for the exosomal release of SDCBP, C  
y).

sed Ras and Erk1/2 signaling pathway that leads to sustained inhibition of long term melanoger

ecessary for the formation of secondary lymphoid organs: peripheral lymph nodes and Peyer's

functions as a DNA-binding transcription factor (PubMed:12095676). Is a potent regulator of th

in of microRNA-10a and thereby in the inflammatory response (PubMed:28167758).

tes the downstream target RHOA that plays a role in the regulation of assembly of focal adhes

ay (PubMed:9394008). May play a direct role in a TNF-alpha signaling pathway leading to indu

ilarity).

is (By similarity). May act as an invasion suppressor in cancers.  
histones during spermatogenesis. Also involved in DNA damage response in somatic cells, by p

o separate regions destined for lysosomal degradation from carriers to be recycled to the plas

signaling and autophagy (PubMed:23604317). PCYT1A monoubiquitination by SCF(FBXL2) ar

1, leading to its degradation, thereby affecting cell proliferation and differentiation (PubMed:24

ε D-box coreceptor, formed by FZR1 and ANAPC10; by suppressing ubiquitin ligation and chain

cell fate and regeneration by restricting the goblet cell lineage program; the function may involve

target YTHDC1 reader on Xist RNA and promoting transcription repression activity of Xist (PubMed:

bound to NF-kappa-B (PubMed:28152074). Interacts with the BRCA1-BARD1 heterodimer and

xylase 2 (EGLN1) (PubMed:15897452). Can enhance apoptosis induced by serum starvation in

prevents premature joining of the 40S and 60S ribosomal subunits prior to initiation (PubMed:15897452).  
vation of alpha catalytic subunit (PRKAA1 or PRKAA2) both by inducing phosphorylation and p

γl-CpG (PubMed:29276034).

ng the dissociation of the TCF7L2/LEF1/beta-catenin complex from DNA, as well as the ubiqui

development. Controls the genesis of hypaxial myogenic progenitors in the dermomyotome by cycle may also contribute to the directionality of export. Binds strongly to m7G-capped U1 and l

assembly of core snRNPs and their transport to the nucleus.

During the initial steps of chromosomal break repair, it is recruited to chromatin in a damage-depe

(PubMed:26735137, PubMed:27974568). Binds nucleic acids with a higher affinity for ssRNA and ssDNA



questioning the classical function of the CSC. The SNX-BAR retromer mediates retrograde tra  
:TMEM30A flippase complex seems to play a role in regulation of cell migration probably invol

in the nucleus: together with SPIRE1 and SPIRE2, promotes assembly of nuclear actin filamen

ral and peripheral clocks can be reset by environmental cues, also known as Zeitgebers (Germ  
ciated with processes that include cell migration, cell adhesion, nutrient supply and cell signalin  
ine fission events, such as the terminal stages of cytokinesis and the budding of enveloped viru

on (PubMed:16433634).

15009667). Plays a role in energy homeostasis by regulating satiety and metabolic rate (By sin

cells from ER stress-induced death (PubMed:17178827). In vitro activates transcription of target

of its target genes (PubMed:25083013). Negatively regulates its own expression and the expression

of trophoblast giant cells. Acts as a promoter of sprouting angiogenesis, possibly by acting as a

Ca<sup>2+</sup> release-activated Ca<sup>2+</sup> (CRAC) channel regulation: sodium transport by SLC8B1 leads to

beta-catenin CTNNB1 by the beta-catenin destruction complex, thus negatively regulating CTNNB1

negatively regulate the activity of homotrimeric non-collagenous domain 1 (PubMed:11257123).

the activation of the prereplicative complex (pre-RC) during G(1) phase by recruiting CDC6 to tl

feration.

ascular stability and pruning: acts by activating the non-canonical Wnt signaling pathway in enc

\_PK1, which phosphorylates TIFA at Thr-9, leading to TIFA homooligomerization and subsequent

serve as a shedding protease for subsequent intramembrane proteolysis by SPPL2A and SPPL2B

then activating Arp2/3 to branch off these filaments. The p53/TP53-cofactor and actin activator also

the transcription factor IRF3 to induce expression of type I interferon and exert a potent immunomodulatory

It deaminates double-stranded DNA or single- or double-stranded RNA. Exhibits antiviral activity

in tuberculosis.

thus to a reduced overall utilization of amino acids, while concomitantly initiating the preferential  
(/ similarity).

(S)-stereospecific hydroxylation at C-3 of 'Lys-22' of DRG1 and 'Lys-21' of DRG2 translation factors  
pairing with the miRNA and most commonly results in translational inhibition or destabilization

of activin signals. Activin binds to type-2 receptor at the plasma membrane and activates its signaling

pathway interactions with cells that express ALCAM (PubMed:15496415, PubMed:16352806). Requirement

transcriptional regulation of P21 in response to DNA damage. Required for FANCD2 targeting to DNA. FANCD2 is involved in both POLH localization at collapsed replication forks and DNA polymerization at stalled replication forks. Promotes FANCD2 ubiquitination and degradation. Slightly promotes SRC ubiquitination. May be involved in EGFR ubiquitination and

actin bundling activity when associated with BAIAP2, enhancing BAIAP2-dependent membrane

actor of the RAG complex: acts by stimulating cleavage and RAG protein binding at the 23 bp s

Acts as a ligand for integrin which is required for IGF2 signaling (PubMed:28873464).

in uninfected cells and following viral infection, double-stranded RNA (dsRNA), or toll-like receptor 3 (TLR3) ligand (CTX) toxin to KCNMA1 peptide blocker by increasing the CTX association rate and decreasing

and sodium channel clusters at mature nodes of Ranvier.

in the cytoplasm, the RNA exosome complex is involved in general mRNA turnover and specifically it is proposed to be recruited to the EJC prior to or during the splicing process and to regulate s

ogenesis (20S-PA200 complex) or generation of a subset of MHC class I-presented antigenic p on repair substrates (PubMed:15314187, PubMed:15556996, PubMed:15871698). The 9-1-1 c



in response to DNA damage. Also recruits to sites of DNA damage proteins like XPA and XPG. In addition to the main protein, there are multiple processed pseudogenes of this gene dispersed through the genome.

Other proteins include: chloride channels: BSND, CLCN2 and CFTR, glutamate transporters: SLC1A3/EAAT1, SLC1A2.

Through the ubiquitin-mediated proteasomal degradation of hepatitis C virus non-structural protein 5 (NS5) (PubMed:21123949). Plays a redundant role in the rapid removal of released glutamate from the brain in placental development (PubMed:10708449, PubMed:23492904).

32). This chaperone activity is important to sustain normal SNARE-complex assembly during apoptosis (PubMed:19111919).

hormones such as insulin or glucagon-like peptide 1 (GLP-1) (By similarity).

cell cycle and entering differentiation, repression by the PML-RARA fusion protein, BMP-induced

oxidized low-density lipoprotein (oxLDL) or amyloid-beta 42. In this context, the initial signal is provided by

chromosome separation and the processing of homologous recombination intermediates to limit

signaling events to the mRNA decay machinery (PubMed:15687258, PubMed:23644599). Recruited to

Plays a key role in histone variant H2AZ1/H2A.Z deposition into specific chromatin regions: re  
ner blood-retinal barrier (By similarity). Can mediate the transport of thyroid hormones triiodoth

ed:10962286, PubMed:12909631, PubMed:15461590, PubMed:17379599). It is for instance e:

ll survival after DNA damage or replication stress by promoting DNA repair (PubMed:17141802

CDKN1A/WAF1 promoter to participate in transcription activation by p53/TP53. May also act as

n ligase complexes depends on the variable substrate recognition components. As a compone  
MTA1-mediated epigenetic regulation of ESR1 expression in breast cancer (PubMed:2441353;

own as the Lands cycle.

r of apoptosis BIRC6 and thus is an important regulator of cell death by promoting apoptosis. *A*

notes the centrosomal localization of CDK2 (PubMed:26297806). In non-mitotic cells, upon stre

reading activity than Pol-delta4 (PubMed:19074196, PubMed:20334433). Although both Pol-d  
ion in multiciliated that can generate more than 100 centrioles. Also involved in trophoblast diff

the scaffold subunit: complexes containing BRPF scaffold (BRPF1, BRD1/BRPF2 or BRPF3) c

ATP (de-AMPylation) from HSPA5/BiP at 'Thr-518', leading to restore HSPA5/BiP activity (By s

ie cytoplasm, the RNA exosome complex is involved in general mRNA turnover and specifically

onse to DNA damage; the function is probably independent of MLL-containing histone methyltr  
attachment. During interkinetic nuclear migration (INM) at G2 phase and nuclear migration in n  
ie cytoplasm, the RNA exosome complex is involved in general mRNA turnover and specifically  
in inhibitor of cyclin A-associated kinase. Also acts a component of the CENPA-CAD (nucleoso

activation (PubMed:30017583). May also play a role in the modulation of arsenic-induced toxicity  
-specific role in T-cell development (PubMed:14532007).

significant sequence similarity to bacterial S18 proteins. The primary sequences of the three huma

binding SOX2 promoter and positively regulating its transcription (By similarity).

| (By similarity).

35865). May be involved in the control of centriolar-microtubule growth by acting as a regulator

conjugation to ATG3 playing a role in mitochondrial homeostasis but not in autophagy. ATG7 (l

1 estrogen receptor-regulated gene transcription and estrogen-stimulated G1/S cell-cycle trans

nization during spermatogenesis. Recruited by the large PER complex to the E-box elements c

assembly of core snRNPs and their transport to the nucleus.

assembly of core snRNPs and their transport to the nucleus.



icts. Interacts with the structure-specific ERCC4-ERCC1 endonuclease and promotes the clea

91, PubMed:31626998, PubMed:31686031).||Substrate-recognition component of the DCX(DC

ctor, indirectly regulates the insulin-like growth factor receptor signaling pathway (PubMed:2665

the ndc-80 complex and may allow the ndc-80 complex to track depolymerizing microtubules (P  
microtubules (PubMed:23085020).

cal Wnt signaling (PubMed:21498478, PubMed:22654112). Acts as negative regulator of the hi

initiates function in multiple RNA-processing events.

↳). Efficiently cleaves both single and double HJs contained within large recombination intermediates  
major histocompatibility complex (MHC) class II probably involving retromer and subsequently a

e pairing with the miRNA and most commonly results in translational inhibition or destabilization

e pairing with the miRNA and most commonly results in translational inhibition or destabilization of mRNA. It is involved in the regulation of the exchange of Ran between the cytoplasm and nucleus.

regulating cortical activity through RHOA during cytokinesis. May participate in the regulation of sulfhydrylase activity.

ubiquitination of UBE2N and UBE2D3. Upon TNF stimulation, deubiquitinates 'Lys-63'-polyubiquitin chains in the nucleus to activate gene transcription. For example, upon IL2R activation by IL2, JAK1 and JAK3.

regulates microtubules (PubMed:25743205, PubMed:23891108).

and balances the cytoplasmic-mitochondrial redox interface (PubMed:31978345). The purine ring is involved in the regulation of the cell cycle.

regulates late neurogenesis, regulates the cerebellar, cerebral cortex and olfactory bulb development. It is involved in the regulation of the cell cycle and leads to recruitment of transcription (TLS) polymerases, while 'Lys-63'-linked polyubiquitination of UBE2N and UBE2D3.

e pairing with the miRNA and most commonly results in translational inhibition or destabilization of mRNA. It is involved in the regulation of the exchange of Ran between the cytoplasm and nucleus.

phosphorylated at 'Thr-3' (H3pT3) during mitosis (PubMed:20929775). The complex with RAN plays a role in the regulation of the cell cycle.

bacterial peptidoglycan, in a NOD2-dependent manner (PubMed:18511561). Contrary to its mc

otor (PubMed:25898167). May play a role in cell proliferation (PubMed:15381421).

ctivity of BIRC4. Seems to be involved in cellular sensitivity to the proapoptotic actions of TRAIL

e pairing with the miRNA and most commonly results in translational inhibition or destabilizatio

1A, TLR2 and TLR4. Plays a role in the inflammatory response to bacterial lipopolysaccharide. Signaling mediates activation of down-stream MAP kinases (By similarity). Contributes to the reg

·omoting bladder cancer cells proliferation, apoptosis inhibition and carcinogenic progression (F

ce by reducing PRDX1 (PubMed:15105503). However, this could not be confirmed (By similarit  
ibits RHO. Phosphorylates multiple receptor tyrosine kinases like PDGFRB and other substrate  
RNA cleavage complex II (CF-II), which seems to be required for mRNA 3'-end formation. Also

ophagic degradation of KEAP1 (PubMed:23274085). May also mediate TP53 inhibition of TOR  
n of the target mRNA. The RefSeq represents the predicted microRNA stem-loop. [provided by

ie may promote folding of a substrate while another may promote degradation. The affinity for p  
n of the target mRNA. The RefSeq represents the predicted microRNA stem-loop. [provided by



essential to control replication licensing (PubMed:18794348, PubMed:19332548). KMT5A degrad

it may promote folding of a substrate while another may promote degradation. The affinity for p  
; (PubMed:27857118). In contrast to CPEB1 and CPEB3, does not play role in synaptic plastici

RAS, MAPK1/ERK2, MAPK3/ERK1 and the MAP kinase signaling pathway, as well as of the A  
action (PubMed:23776040).||May play a role in uric acid excretion.

n of the target mRNA. The RefSeq represents the predicted microRNA stem-loop. [provided by

and PI3K pathways in cancer cells.

l:26565916). Stimulates Indian hedgehog (Ihh)-induced target gene expression mediated by the

Med:26878239, PubMed:20739937, PubMed:21478274). Required for recruitment and assembly

an active role at kinetochores, enhancing their links with dynamic microtubule ends (PubMed:20739937, PubMed:21478274). Involved in dendritic cell regulation of T-cell

recruits LOXL2 to pericentromeric regions to oxidize histone H3 and repress transcription which leads to

n of the target mRNA. The RefSeq represents the predicted microRNA stem-loop. [provided by

osphorylates p53/TP53 in response to reactive oxygen species (ROS), thereby promoting p53/

n of the target mRNA. The RefSeq represents the predicted microRNA stem-loop. [provided by

s a transcription regulator that represses WT1-dependent transcription regulation, thereby tran  
} and RAD23A. Has a preference to bind DNA containing a short single-stranded segment but  
anslocation of amyloid-beta peptide (ABPP) across the cell membrane from the extracellular to  
nd phosphorylates keratin-8 (KRT8), which induces targeting of desmoplakin at desmosomes ε

4). In response to TNF and in parallel to NF-kappa-B activation, negatively regulates RANTES

It binds to core DNA sequence 5'-TGCGTG-3' within the dioxin response element (DRE) of target

Dephosphorylation of PRKCA and PRKCB leads to their destabilization and degradation. Dephosphorylation (PubMed:20682778). Acts as a ligand for integrins and binds (via EGF domain) to integrins ITGA1

is half-site motif 5'-[A/G]GGTCA-3' preceded by an A/T-rich 5' sequence (RevRE), or as a homodimer

The CST complex is also proposed to be involved in fill-in synthesis of the telomeric C-strand precursor

between NSF and the GRIA2 subunit of AMPARs, leading to a rapid rundown of AMPAR-mediated responses in neonates (By similarity). Plays a role in early coronary blood vessels formation (By similarity)

centriole-microtubule attachment and faithful mitotic progression (PubMed:19620631). As a component of

isoform of CDKN2A (PubMed:24382891).

act as a tumor suppressor and inhibits malignant cell transformation (PubMed:17998805).||[Isofo

gene (CYP7A) expression in liver. May also contribute to the regulation of pancreas-specific g

ribosomal degradation (PubMed:12821780, PubMed:15053880, PubMed:15195100, PubMed:15

macrophages and T-lymphocytes through its receptors, CXCR4 and ACKR3, and decreases monocyte

histone mRNA degradation, probably through terminal uridylation of mature histone mRNAs. M

is involved in neurogenesis and in the development of cortical architecture (By similarity). Isoforms that lack

receptors (PRRs). Protects cells from spontaneous formation of the ripoptosome, a large multi-pr

tion of the target mRNA. The RefSeq represents the predicted microRNA stem-loop. [provided by  
GenBank] involved in age responses as well as in signaling processes leading to activation of the transcription factor

assembly of bipolar spindles by phosphorylating KIZ, NEDD1 and NINL. NEDD1 phosphorylation checkpoint signaling is terminated at late cytokinesis (PubMed:22422861, PubMed:24811111). When levels are low, translocates to the nucleus and promotes expression of SOX9, which induces chondrogenesis.

Block-controlled genes involved in lipid metabolism.

Regulate the transition of myoblasts from the proliferative phase to the differentiation phase (By similarity).

Positively regulate the apoptotic effects of IFIT2.

other cytokines, probably interleukins.

n of the target mRNA. The RefSeq represents the predicted microRNA stem-loop. [provided by  
osis. Acts as a tumor suppressor by inducing cell death by an autophagy and caspase-depend



n maintaining centriole cohesion involved in controlling spindle pole integrity. Involved in centric

chromatin organization or whether it is an indirect consequence of its function in maintaining mitoc

'Tyr-363' thereby promoting its recruitment to androgen-responsive enhancers (AREs). Phospho

binds neuron-restrictive silencer element (NRSE) and represses neuronal gene transcription in  
its (6-4 PP), apurinic sites and short mismatches (PubMed:10882109, PubMed:11278856, Pub

receptor and interacts with SMAD4. The SMAD2-SMAD4 complex is subsequently translocated

phosphate. KIT signaling is modulated by protein phosphatases, and by rapid internalization an

the expression of C/EBP regulated genes (By similarity). Positively regulates the transcription c

:27694961). Ubiquitinates and regulates protein levels of NTRK1 once this one is activated by

ε (PubMed:28471450). It may also play a role in the regulation of inflammation induced by high

of inflammatory gene expression (PubMed:12628924, PubMed:18511904). In skeletal myobla

n of the target mRNA. The RefSeq represents the predicted microRNA stem-loop. [provided by  
acting DNA methylation and histone modifications. Has E3 ubiquitin-protein ligase activity by m

n of the target mRNA. The RefSeq represents the predicted microRNA stem-loop. [provided by

austed T-cell phenotype and the normalization of the anti-tumor response, providing a rationale  
(PubMed:18703514).

n of the target mRNA. The RefSeq represents the predicted microRNA stem-loop. [provided by

recruits PTPN6 resulting in dephosphorylation of CD247 and ZAP70 (PubMed:18424730). Also

cross-link repair (PubMed:26253028).

and for the translocation of RGS14 from the cytoplasm to the plasma membrane. Required for n

n of the target mRNA. The RefSeq represents the predicted microRNA stem-loop. [provided by

proliferation even if the mechanisms are unknown (By similarity). In cancers such as thyroid or lung

histone deacetylase that links transcriptional regulation directly to intracellular energetics and

n of the target mRNA. The RefSeq represents the predicted microRNA stem-loop. [provided by 9098711). May also regulate the ubiquitin-mediated proteasomal degradation of other proteins

BUB3. The BUB1-BUB3 complex plays a role in the inhibition of APC/C when spindle-assembl

on of membraneless organelles at the onset of mitosis is also required to release mitotic regulat

31/2, PIAS1/GBP, EIF2AK2/PKR and RSAD2/viperin; antibacterial response, such as NOS2/IN

; function in multiple RNA-processing events. Isoform 2 is responsible for processing a yet unkr

ll development and activation (By similarity). Plays a role in phagocytosis of apoptotic cells by r

rial membrane, facing the cytosol (PubMed:21397848). Has been shown to be a backbone-nor

GSK-3 kinase. Both pathways seem to involve interactions with G-proteins. May be involved ir

ues. Coreceptor along with RYK of Wnt proteins, such as WNT1.

n of the target mRNA. The RefSeq represents the predicted microRNA stem-loop. [provided by

PubMed:25126726). In addition to its role in mTORC1 signaling, also acts as a co-chaperone c  
ilarity). Activates AURKB and AURKC (PubMed:27332895). Required for localization of CBX5

nal mitosis.

hydrolyzes the non-canonical purine nucleotides inosine diphosphate (IDP) and deoxyinosine d

744926, PubMed:22108654, PubMed:23274426). Can also phosphorylate diacylglycerol substr  
polymerase activity. Required for normal axon formation. Plays a role in microtubule remodeling

na into a sliding clamp capable of hydrolysis-independent diffusion along the DNA backbone. T  
istry), followed by insertion of molecular O<sub>2</sub> to form the endoperoxide bridge between carbon 9

e 2 ends of resected double-strand breaks, allowing microhomologous sequences in the overh:

(PubMed:10200294, PubMed:15793005).

n of the target mRNA. The RefSeq represents the predicted microRNA stem-loop. [provided by

n of pro- and anti-inflammatory cytokines. Also functions as a negative regulator of innate immu

age response: up-regulated by p53/TP53 following genotoxic stress and acts as a downstream  
n of the target mRNA. The RefSeq represents the predicted microRNA stem-loop. [provided by  
endent of its fructose-bisphosphatase activity (PubMed:23185017). In response to cardiac darr

cytotoxic T cell differentiation.

l of NEK2 to centrosomes, and its ability to phosphorylate CROCC and CEP250. In conjunctor



n between NTRK2/TRKB and KLC1 and drives NTRK2/TRKB axonal but not dendritic anterog

s as a monomer to a response element composed of the consensus half-site motif 5'-[A/G]GG'

; first meiotic division through phosphorylation of HMGA2. Phosphorylates: PPP1CC; SGO1; N

n of the target mRNA. The RefSeq represents the predicted microRNA stem-loop. [provided by

ic adaptations to cold temperatures (By similarity).

rated in response to selective autophagy: autophagy promotes interaction between KEAP1 and

way (PubMed:28712728).

processes and development of tissue damage after ischemia. Regulates biosynthesis of luteiniz

c scaling, thereby contributing to neuronal homeostasis. Acts as a postsynaptic mediator of act

and FAK. Can evoke collapse of embryonic neuronal growth cone and regulates dendritic spin

CM2, MCM4, MKLP1, MYB, NEFH, NFIC, NPC/nuclear pore complex, PITPNM1/NIR2, NPM1,

essential physiological compound (PubMed:9607309). Has both an extracellular and an intracellular activity, but not repression activity. [[Isoform Alpha-C1]: Has transcriptional activation activity.

Responds to cellular stress. Forms multisubunit signaling complexes with SRC and SRC family members.

Facilitates recruitment of 53BP1/TP53BP1, UIMC1/RAP80, and BRCA1 to DNA damage sites (PubMed:11376341, PubMed:14734526). Hydrolysis of ATP and co-chaperone followed by client protein forms a functional chaperone. After the

recruiting SNARE complex component SNAP29. Is required for recruitment of transition zone proteins (PubMed:11376341, PubMed:14734526). Forms a Schiff base with 5'-deoxyribose phosphate derivatives (PubMed:10754304). Interacts with CD160 on NK cells, enhancing IFNG production and

i (PubMed:26643732). Also involved in the induction of adipogenesis from mesenchymal stem  
ates T-cell development in the thymus.

minouracil (5-OE-RU) and 5-(2-oxopropylideneamino)-6-D-ribitylaminouracil (5-OP-RU), produc  
to translation inhibition (PubMed:15479637, PubMed:23071094). Also functions as an effector

itis B virus (HBV), herpes simplex virus 1 (HHV-1) and Epstein-Barr virus (EBV) and may inhib

sociation with promoters of TCF-responsive genes. Seems to repress transcription from E2F1 ;

as dengue virus (DENV), west Nile virus (WNV), and reovirus. Also involved in antiviral signaling

ytic subunit p110 (PIK3CA/PIK3CB/PIK3CD) and reducing PIK3R1/PIK3R2 activation. Via its re

ed for normal water homeostasis and to prevent excessive water loss through the skin, probably

ulate t-loop formation (PubMed:10888888).

MD1- and actin-dependent manner (PubMed:10564580, PubMed:28604741). May play a role i

pha and IFN-beta interferons (PubMed:28469175, PubMed:31006531). Ligands include 5'-triph

ilic GMP-AMP (cGAMP), a messenger produced by CGAS in response to DNA virus in the cyto

uncoupled from G-proteins. Two different modes of arrestin-mediated internalization occur. Cl

PubMed:27796300). In macrophages, positively regulates MRC1 expression in response to IL4 s

okines.

ically targets the multiply spliced but not unspliced or singly spliced HIV-1 mRNAs for degradat

at contains Rab8 and huntingtin (HD). Mediates the interaction of Rab8 with the probable GTF

or proliferation, signaling and cytokine production of naive, effector and memory T-cells. Requir

230272). By monoubiquitinating histone H2B H2BC9/H2BJ and thereby promoting chromatin re

s. Acts as a transcriptional corepressor for SNAI1 and SNAI2/SLUG-dependent repression of E



functions as a component of numerous distinct DCX (DDB1-CUL4-X-box) E3 ubiquitin-protein

plays also an important role in inhibition of Toll-like receptors (TLRs)-mediated innate immune r

or AXL are CBL, NCK2, SOCS1 and TNS2. Recruitment of GRB2 and phosphatidylinositol 3 kinases are held in the cytoplasm in an inactive state complexed with members of the NF-kappa-B

the hypothalamic KiSS1/GPR54 system is a pivotal factor in central regulation of the gonadotropin

secretion. Required for recycling of the TGF-beta receptor. Involved in CFTR trafficking to the late

endosome. Involved in nuclear remodeling during sperm head formation in spermatogenesis; a probable SUN3:SAH1 complex thereby helps to establish a tonotopic map. Kinetics of KCNMA1 channels are determined by all

logous expression, inhibits the adhesion of endothelial cell to the extracellular matrix (ECM), ar

ses such as apoptosis, cell growth, differentiation and gene regulation (PubMed:21142819). Me  
yogenesis; potentiates transcriptional activation of NODAL-mediated gene transcription in the l

d for proper BBSome complex assembly and its ciliary localization.

; the activity of genes essential for dendrite growth (By similarity). Muscle-specific component c

æ mitochondrial matrix.

with INSM1 on the NEUROD1 and INS promoters in a cell cycle-independent manner.

ilarity). Interacts with the NF-kappa-B transactivator p65 RELA and inhibits its phosphorylation  
ator, CYC1, from the mitochondrial membrane. Also acts as a regulator of G2 checkpoint and p

n inhibit viral replication. May regulate matrix nuclear localization, both nuclear import of PIC (F

and the electron transfer chain comprised of ferredoxin reductase and ferredoxin, which receive

, integrin alpha-IIb/beta-3 signaling in platelets and JNK signaling in B-cells. Regulates proliferation, terminate autophagy and promote apoptosis (PubMed:26263979). Might play a central role in th

aling (PubMed:23545260).

ing a role beyond the maintenance of the latency of the PDGF domain. In the nucleus, PDGFC s

on from the 14-3-3 protein YWHAQ which acts as a negative regulator.

mitter release at synapses formed between cultured sympathetic ganglion cells. Critical particip

ory genes, thereby leading to an innate immune response in the infected cell. Restricts infectior

Med:14672706). Acts as a corepressor of RXR and the RXR-LXR heterodimers and represses  
PubMed:10587585). Required for cardiac homeostasis (PubMed:10580070, PubMed:12927431,

after radiation injury (By similarity). Modulates the cellular apoptosis program by regulating CO  
ient 4 (AS4) involved in neurexin selective targeting to postsynaptic partners such as neuroligin  
itis B virus (HBV) and human T-cell leukemia virus type 1 (HTLV-1) and may inhibit the mobility  
oy human Epstein-Barr virus vIL-10 protein, thereby affecting the transport of peptides into the  
initiation factor 4E (eIF4E). mTORC1 phosphorylates and activates S6K1 at 'Thr-389', which th  
opolysaccharide (LPS) et mediates LPS-induced inflammatory response, including TNF secreti

pinal projections. May also control the segregation of motor and sensory axons during neuromi

ucleus to effect transcription of specific target genes. Plays a critical role in bone formation thrc

re mitogen-activated protein kinase (MAPK) kinase and the nuclear factor NF-kappa-B (NF-kB)

nd enzymatic activation (PubMed:30692621). When secreted, promotes the proliferation of bel

lain, which is linked to the VCP-mediated ER-associated degradation (ERAD) pathway. Promot

ability of CDKN1A promoting DNA damage-induced cell cycle arrest. Also plays a role in mega

iosis, and DNA repair (PubMed:14966270). The NuA4 complex ATPase and helicase activities

as an autoantigen in the immunopathogenesis of psoriasis, with certain peptide regions being a

m high sensitivity alpha-4(2):beta-2(3) to low sensitivity alpha-4(3):beta-2(2) nAChR (By similar

gh peroxisomal beta-oxidation (PubMed:15060085).

and oxidation of lysine residues by LOXL3, leads to disrupt STAT3 dimerization and inhibit its tr  
proteins mostly dissociate from the invaginating membrane before the ILV is released (PubMec

ility, in long-term in vitro culture and cancers, by abbreviating mitotic phase and impairing the l

n of the target mRNA. The RefSeq represents the predicted microRNA stem-loop. [provided by

major developmental effects in somatosensory neurons and in brainstem nuclei involved in mot

n of the target mRNA. The RefSeq represents the predicted microRNA stem-loop. [provided by

s as a dimer and is much less active. Both double-stranded and single-stranded regions of a p

the transformed phenotype of cancer cells (PubMed:22722849). Also able to mediate deacetyl

BAF and nBAF complexes. As neural progenitors exit mitosis and differentiate into neurons, η



ed:25820262). Regulates the DNA repair pathway choice by inhibiting non-homologous end joi

nd increased competition with RAF1 for binding to GTP-bound form of Ras proteins (NRAS, Hf

conditions of oxidative stress in the presence of RAD51 and RAD51C.

nulation of HIF1A (PubMed:16819549). In vitro able to promote polyubiquitination using all 7 ul

man for 'timegivers'). The predominant Zeitgeber for the central clock is light, which is sensed b

GABA transporter (SLC6A12) and EGFR/ERBB1, ERBB2, ERBB3 and ERBB4 to the basolate

on, such as those encoding cytokines (IL6 and IL2), cell surface receptors (ICOS, TNFRSF4 an

normal progress through mitosis.

n of the target mRNA. The RefSeq represents the predicted microRNA stem-loop. [provided by

nine residues and this phosphorylation attenuates the ability of PAGE4 to potentiate the transc  
n of the target mRNA. The RefSeq represents the predicted microRNA stem-loop. [provided by

king two epigenetic repression systems. Genes repressed by the PRC2/EED-EZH2 complex inc

n of the target mRNA. The RefSeq represents the predicted microRNA stem-loop. [provided by

antigen by T cell antigen receptor (TCR) (By similarity).

nd proficient non-homologous end-joining (NHEJ)-directed DNA repair by catalyzing the di- anc

→ T-cell CD8SP from thymocytes. Required for the switching of fetal globin species, and beta- a  
active site in subunit 1, a binuclear center (BNC) formed by heme A3 and copper B (CU(B)). Th

man for 'timegivers'). The predominant Zeitgeber for the central clock is light, which is sensed t  
tion. Phosphorylates DLG1. Following osmotic shock, MAPK12 in the cell nucleus increases its

man for 'timegivers'). The predominant Zeitgeber for the central clock is light, which is sensed t

ombination (PubMed:21247901). May promote DNA mismatch repair (PubMed:26221039).

ng midbrain. May be involved in regulation of myeloid differentiation. Can bind to the DNA seq

n of the target mRNA. The RefSeq represents the predicted microRNA stem-loop. [provided by  
involved in Arp2/3 complex-dependent actin assembly driving Salmonella typhimurium invasion

'5644). Calcium is required for high affinity binding to GABA (By similarity). Plays a critical role

n of the target mRNA. The RefSeq represents the predicted microRNA stem-loop. [provided by

noid biosynthesis via the cyclooxygenase pathway (PubMed:18451993, PubMed:7794891, Pul

al nervous system vascular morphogenesis (By similarity). Acts as a transporter for tunicamycin

man for 'timegivers'). The predominant Zeitgeber for the central clock is light, which is sensed by

annel regulator. Involved in adhesive protein-protein and protein-carbohydrate interactions.

also been identified as a potential tumor suppressor, with its down-regulation associated with c

is capable of displacing duplex regions up to 100 bp, which can be extended up to 500 bp by

response activation through the cGAS-STING pathway (PubMed:28712728).

n of the target mRNA. The RefSeq represents the predicted microRNA stem-loop. [provided by

regulates initiation of autophagy by regulating the RAB1A-dependent trafficking of the ATG1/L  
ntial for the self-renewal/proliferative capacity of the multipotent neural stem cells. The nBAF  $\alpha$

n of the target mRNA. The RefSeq represents the predicted microRNA stem-loop. [provided by

n of the target mRNA. The RefSeq represents the predicted microRNA stem-loop. [provided by

n of the target mRNA. The RefSeq represents the predicted microRNA stem-loop. [provided by

PubMed:20061386).

types of cancer. This gene family contains numerous pseudogenes. [provided by RefSeq, May 2016]  
m estrone (E1) and 17beta-estradiol (E2), namely 2-hydroxy E1 and E2, as well as D-ring hydr

n of the target mRNA. The RefSeq represents the predicted microRNA stem-loop. [provided by

n of the target mRNA. The RefSeq represents the predicted microRNA stem-loop. [provided by

n of the target mRNA. The RefSeq represents the predicted microRNA stem-loop. [provided by





n of the target mRNA. The RefSeq represents the predicted microRNA stem-loop. [provided by  
n of the target mRNA. The RefSeq represents the predicted microRNA stem-loop. [provided by

ent induction of NR2B expression involves a release of HDAC1 and recruitment of CREBBP (B

omotes neuronal differentiation (By similarity).

ctron transport chain resulting in control of mitochondrial ROS production (PubMed:20453889,

arity). Promotes colon cancer cell migration and invasion in an integrin alpha-6/beta-1-depende

active site in subunit 1, a binuclear center (BNC) formed by heme A3 and copper B (CU(B)). Th

particular antigen. The variable domains are assembled by a process called V-(D)-J rearranger

tion between pancreatic islet cells to regulate glucose-stimulated insulin secretion (By similarity

odeling high-density lipoprotein particles into their spherical forms (PubMed:10722751). Cataly

phosphorylation of the CTD domain of RNA pol II (By similarity). In addition, enhances MYOD1  
·5' double stranded DNA exonuclease activity. Its phosphorylation by PRKCD may be required

ction and homeostasis of both CD8(+) and CD4(+) T-cells (PubMed:7805750, PubMed:864718

sorption and bicarbonate secretion by the small intestinal brush border membrane and contribu

EFNB2-expressing cells. May play a role in constraining the orientation of longitudinally projecti

n of the target mRNA. The RefSeq represents the predicted microRNA stem-loop. [provided by

ity).

aminogen activation (PubMed:15016824). Plays a role in male fertility (PubMed:21919946, Pub  
go receptor to selectively sort the membrane proteins involved in receptor-mediated endocytos  
C6A19 and regulating its activity (By similarity).

æ and inflammation and implicates NOS3/eNOS dysfunction (PubMed:22928666). Can inhibit e

g secreting cells (PubMed:12626569). Associates with the transcriptional repressor ZNF683 to  
l differentiation. Also involved in interleukin-6 (IL6) induced differentiation. Plays also a role in p  
ease (PubMed:27076518). In response to DNA damage, mediates intrinsic apoptotic process in  
sity lipoprotein (LDL) receptor (LDLR) mRNA in response to phorbol 12-myristate 13-acetate (f

s leading to its subsequent degradation (PubMed:25893292).

e C that coordinate signaling pathways promoting calcium mobilization and actin-mediated cytc

led:20332120).

issues repair.

tion, cell migration, and angiogenesis (PubMed:18222923, PubMed:20194890). Required for r  
skeleton. Isoform 2 can phosphorylate myosin, PPP1R12A and MYL12B. Overexpression lead  
promoter region via association with RELA. Binds to poly(A) RNA. May be involved in 3'-end cleav

rse set of cell protrusions, such as filopodia and lamellipodia, necessary for platelet cell spread  
es the ARHGEF15-mediated negative regulation on excitatory synapse formation. Controls oth

ving proteolytic cleavage by PRTN3 (PubMed:23202369). Proposed to have a bronchoprotective role (PubMed:176466, PubMed:16223769, PubMed:16651416, PubMed:18095711). Also has dipeptidyl peptidase activity.

isoform 2 seems to be less efficient in signal transduction, because it has a truncated C-terminal domain. Participates in signal transduction pathways that regulate the integrity of the glomerular slit diaphragm, or regulation of thrombotic responses.

regulatory cytokine production (PubMed:23762476, PubMed:16787920, PubMed:16705036, PubMed:16705036).

regulated transcription. Phosphorylation of TP53/p53, a crucial tumor suppressor, inhibits TP53/p53 transcriptional activity. Acts as a regulator of B-cell development by inhibiting UBE2N/Ubc13, thereby restricting the activation of B-cells.

FOXA1 and FOXA2 seem to have at least in part redundant roles (By similarity). Modulates the transcription of genes involved in cell cycle regulation.

action enhances binding of SMAD3 to the FOXP3 promoter, leading to up-regulation of FOXP3

s required for embryonic stem cell pluripotency including POU5F1/OCT4, NANOG, KLF4 and  $\xi$

transferrin is a major iron-binding and multifunctional protein found in exocrine fluids such as b

throgenetic effects while PI3K/AKT coordinates prosurvival effects. During embryonic developm

so recognizes and binds histone H3 acetylated and butyrylated at 'Lys-9' (H3K9ac and H3K9b

ian for 'timegivers'). The predominant Zeitgeber for the central clock is light, which is sensed by

s (EMCV) and stimulates the alternative antiviral pathway independent of RNase L.



Med:12699694). Similarly, catalyzes the two-step conversion of an N-fatty acylglycine to a prim

s macrophage-mediated phagocytosis of apoptotic leukocytes by tethering them to the phagocytosis polarized epithelial cells; the function seems to be independent from its flippase activity. Req

requently transported to the liver for degradation and excretion (PubMed:21736953). Two distinct

. In cancer cells, substitution of isoform 1 (E2) by isoform 2 (E1) results in immunoproteasome

by similarity). Down-regulates TLR9-mediated activation of NF-kappa-B, as well as production of cytokines (PubMed:18756269).

ess to insulin. May also mediate transport from the endoplasmic reticulum to the Golgi.

required for optimal migration of thymic natural regulatory T cells (nTregs) and DN1 early thymo

C to the receptor complexes where it phosphorylates the tyrosine residues within the receptor c

er development and functioning of the nervous system. As an example of their role in signal tra

ilarity). Triggers the formation of an extrusion apical actin ring required for epithelial extrusion c

on and apoptosis, and uses different modes of RNA stem-loop binding to exert either translatio

ation. Adapter that mediates the interaction between TRAF6 and CYLD (By similarity). May be

optosis. Binding to MEFV allows MEFV to bind to PYCARD and facilitates pyroptosome formati

ably in specific endosome subpopulations (PubMed:25266290). Functions predominantly in Al

on neighboring nucleosomes (PubMed:22009739). Acts as a corepressor for REST by facilitat

that coordinates with SH3RF1 in organizing different components of the JNK pathway, includi

signaled by CD40, TNFR1 and TNFR2.

1 signaling and activation of the small GTPase RAP1 (PubMed:12432078). Promotes cell migr

idized low-density lipoprotein (oxLDL) or amyloid-beta 42. In this context, the initial signal is pro

(FRCs) adhesion to the extracellular matrix (ECM) and contraction of the actomyosin by maintain  
ing to (PubMed:22253824). RNA-binding protein that plays a role in the regulation of alternati

RNA degradation machinery as it has endonuclease activity required to initiate NMD, and to se

rity).

ed:24336198, PubMed:28229507, PubMed:26294762, PubMed:26431200). Likewise, suppress  
ate, chondroitin sulfate and dermatan sulfate (PubMed:16982628).

(PtdIns3P) forming on membranes of the endoplasmic reticulum upon activation of the upstre:

une response and in the regulation of T-cell differentiation and proliferation. Negatively regulate  
d secretion of proinflammatory cytokines. The function as activating adapter in different types o  
proteasomal degradation (PubMed:22522597). Originally identified as a tumor suppressor, it n  
al. Isoform 5 and isoform 6 display reduced activity.

red for normal neuron migration during embryonic brain development. Plays a role in neuronal  
nfluenced processes such as angiogenesis in retinal and cardiac functionality. Target proteins

muscle cells, is also involved in immune system regulation (Probable). Modulator of vascular rem

In case of infection by Herpesvirus saimiri, may play a role in vesicular transport or membrane

uced epithelial-mesenchymal transition and myofibroblast differentiation (PubMed:30696809).

ed in the regulation of the hedgehog/smoothened (Hh) signaling pathway by mediating the ubiquitination of Smoothened (SMO) (PubMed ID:25527291). Required for ubiquinone reduction by mitochondrial complex I by mediating phosphorylation of UQCRC1. Inhibits and internalizes SLC4A4 as well as CFTR activities and surface expression, recruits STK39 which mediates its ubiquitination.

1.

7). It is unclear how it can both act as a microtubule organizer and as a transcription factor; additional studies are needed.







ates to MLKL mediates the release of an N-terminal auto-inhibitory region, leading to activation

389856). Also hydrolyzes dihydroceramides to produce dihydrosphingosine (PubMed:2020793)

in myotubes induces the formation of NMJ by regulating different processes including the trans

receptor tyrosine kinases and more particularly promotes endocytosis of EGFR, facilitates the form

which has a low  $K_m$  for acetaldehydes, and is localized in mitochondrial matrix. Alternative splic

of CASP4. Associates with chromatin in a region surrounding the CASP4 transcriptional start site  
and performs physiological functions on the surface of neurons relevant to neurite growth, ne

methylation states of H3K9 and H3K4) and association with CBX5. Involved in maintaining telome

es in many regions of the CNS. The versatility of BDNF is emphasized by its contribution to a re

stimulates adjacent fibroblasts to produce matrix metalloproteinases (MMPs). Seems to be a rec  
(SV) and murine leukemia virus (MLV), flaviviridae: hepatitis C virus (HCV), filoviridae: ebola v

B-dependent transcriptional activation (By similarity). Involved in lineage commitment of immat

cluding loss of stress fibers, and enhanced motility during cell differentiation. Prevents myeloid  
TOPOI and stimulates its activity. This complex binds to rRNA gene promoters and may play a

'92). Protects cells against apoptosis and against cytolysis by complement (PubMed:2780565)

aments. May play a crucial role in cell differentiation.

and play a key role in Okazaki fragments processing and DSB repair, the 5'-3' DNA helicase act  
cal processes by cleaving peptides in the circulation, including many chemokines, mitogenic gr

its transcriptional activity. Acts as transcriptional repressor of IL-17 expression in Th-17 differer

athway. Promotes phosphorylation of SHC1, STAT1 and PTPN11/SHP2. In the nucleus, enhan

ment of free VEGFA and preventing its binding to KDR. Likewise, isoforms lacking a transmembr

when expressed in endothelial cells, it sustains the abluminal to luminal transcytosis of tissue-d

lial cells to promote division, migration and the formation of capillary-like tubule structures (By s

h APC, AXIN1 and CTNNB1/beta-catenin and phosphorylates the N-terminus of CTNNB1 lead

(PubMed:8135828, PubMed:29915090, PubMed:30850536). Independently of the subunit bet:  
), PubMed:29915090, PubMed:30850536).

rogates the effect of KAT5-mediated relieving of NR1D2 transcription repression activity. Com

AD and potentiates activation by NCOA1 and CREBBP. Involved in the axonal distribution and  
nic peptides from the EBV latent antigens (PubMed:18779413).||Allele A\*02:01: A major allele  
pol (RQYDQILIE, GQGQWTYQI) and rev (LQLPPLERL), all having in common a Gln residue ε

nethylation of 'Lys-9' of histone H3 (H3K9me) by the GLP1/EHMT1 and G9a/EHMT2 histone m  
PubMed:25001086). Channel activity is modulated by activation of serotonin receptors (By similar

, and stabilizing the actin cytoskeleton (PubMed:11832213, PubMed:15660133, PubMed:16230

EGFR N-glycosylation enhances the interaction between EGFR and LGALS3 and thereby prev

ppears to have a role in myocardial cell death pathways. Contributes to myocardial oxidative st

actin cytoskeleton (PubMed:29467281). May play a role in transporting DAB2 from the plasm

on as well as by interactions with other cofactors or corepressors. NF-kappa-B complexes are l

n PML-12 show antiviral activity against encephalomyocarditis virus (EMCV) by promoting nucl

response to increased  $\text{Ca}^{2+}$  levels, regulates NFAT-mediated transcription probably by deph  
quently transferred to polymerase delta and polymerase epsilon for processive synthesis on the

igger a cell cycle arrest program which is associated with the accumulation of the hyper-phosp

ation during development. Intracellularly, degrades TSC2, leading to the activation of TSC2 dov  
sin-D is a specific sphingomyelin phosphodiesterase activator (EC 3.1.4.12).||Saposins are spe

agonizes the PI3K-AKT/PKB signaling pathway by dephosphorylating phosphoinositides and th

ervous system. Plays a role in osteogenesis and differentiation of osteoblasts. Functions in inte



dylethanolamine (NAPE), which serves as precursor for N-acylethanolamines (NAEs) (PubMed:19202191, PubMed:19759395, PubMed:20064462, PubMed:20829486). During immu  
ed:20148032). Represses transcription of MAP1A in non-neuronal cells but not in neuronal cell

n factors and the cofactor CREBBP (PubMed:16223362). Upon insulin-derived signal, acts ind

l, PubMed:10903140). The complexes function as amino acid exchangers (PubMed:11557028

itotic neurons requires a switch in subunit composition of the npBAF and nBAF complexes. As

AF), migrates into the nucleus and binds to the IFN gamma activated sequence (GAS) to drive

as the proteolytic cleavage of LAG3, leading to release the secreted form of LAG3 (By similarity

ceptor and interacts with SMAD4. The SMAD2-SMAD4 complex is subsequently translocated  
ipates in the junctional retention and stability of the transcription factor DBPA, but is not involve

ion is largely independent of transcription. Induces the transcription of long intergenic non-codii

For example, it acts as a repressor in absence of adenovirus E1A protein but as an activator in its presence.

It is also involved in the regulation of peroxisomal enzymes such as peroxisomal acyl-CoA oxidase and peroxisomal glutathione peroxidase (PHGPx), two proteins required for sperm maturation. May also be involved in

regulation of osteoblast differentiation. It is also involved in the regulation of osteoblast differentiation by mediating PARylation of osteoblasts. It is also involved in the regulation of osteoblast differentiation by mediating PARylation of osteoblasts.

(By similarity).

Involved in centrosome maturation during prometaphase by mediating PARylation of centrosomes (PM1739745).

ision by inhibiting VEGFA production threereby inhibiting angiogenesis through a signaling pathv

ND63 and syndecan (PubMed:22660413).

resis by reducing dendrite extension and melanin synthesis. Provides also inhibitory signals for  
patches. Acts as a developmental checkpoint and regulates thymocyte positive selection towa  
e RB1 pathway through induction of RB1 expression (PubMed:14533007). Plays a crucial role

ions and actin stress fibers. Stimulates cell survival by phosphorylating the BCL2 antagonist of

ction of cell death (PubMed:8995684).

promoting degradation of histones following DNA double-strand breaks.

na membrane (PubMed:30220460). Required for normal cell proliferation, cell migration, and n

and subsequent degradation regulates synthesis of phosphatidylcholine, which is utilized for form

:362026). Associated component of the 3M complex, suggesting that it mediates some of 3M c

n elongation by APC by preventing the UBE2C and UBE2S activities (PubMed:23708605, Pub

re regulation of AGR2. Essential transcriptional regulator of B-cell development. Involved in reg

Med:27602518). Functions in the regulation of alternative or illicit splicing, possibly by regulatin

d regulates its activity. Specifically binds 'Lys-6'-linked polyubiquitin chains. Interaction with autc  
n mammary epithelial cell line HC11 (By similarity).

17581632). The eIF-3 complex specifically targets and initiates translation of a subset of mRN/  
reventing dephosphorylation of catalytic subunits. ADP also stimulates phosphorylation, withou

mination and subsequent proteolysis of LEF1. Together these effects inhibit the transcriptional ε

y transactivating PAX3 and the delamination and migration of the hypaxial precursors from the J5 small nuclear RNAs (snRNAs) in a sequence-unspecific manner and phosphorylation-indep

endent manner and functionally interacts with the MRN complex to accelerate resection through

VA than for dsDNA (PubMed:27974568).||Isoform 4 does not inhibit programmed ribosomal fra

transport of cargo proteins from endosomes to the trans-Golgi network (TGN) and is involved in driving flippase-mediated translocation of phosphatidylethanolamine (PE) at the plasma membrane.

acts in response to DNA damage in order to facilitate movement of chromatin and repair factors.

known for 'timegivers'). The predominant Zeitgeber for the central clock is light, which is sensed by cryptochromes (PubMed:28892079). Involved in copper-dependent ATP7A trafficking between the trans-Golgi network and lysosomes (HIV-1 and other lentiviruses). ESCRT-III proteins are believed to mediate the necessary vesicle trafficking.

promotes adipogenesis by activating JNK1 and inhibiting the p38MAPK pathway, and is involved in insulin resistance (obesity-related insulin resistance).



t genes via direct binding to the CRE site (PubMed:17178827).

ssion of DBP and BHLHE41/DEC2. Acts as a corepressor of RXR and the RXR-LXR heterodin

is a transcription activator: associates with HIF1A, recognizes and binds the VEGFA promoter,

is to promote calcium-shuttling that modulates mitochondrial redox status, thereby regulating S

NB1 degradation (PubMed:27098453). Serves as a scaffold to coordinate PI3K/AKT pathway-c

.||Probably plays a major role in determining the retinal structure as well as in the closure of the

he origin recognition complex (ORC) (PubMed:15684404). Probably by regulating HR, plays a

dothelial cells (By similarity) (PubMed:21727895, PubMed:21909076, PubMed:22615920). Car

ent activation of proinflammatory NF-kappa-B signaling (PubMed:30111836).

9L2B of the envelope glycoprotein gp130 (PubMed:23132852). Plays a role in the regulation of

activities are regulated via its subcellular location (By similarity).

ity against invading pathogens (PubMed:25636800). Component of a multi-helicase-TICAM1 c

also against hepatitis B virus (HBV), equine infectious anemia virus (EIAV), xenotropic MuLV-r

l translation of ISR-specific mRNAs, such as the transcriptional activator ATF4, and hence allo

ctors (TRAFAC), promoting their interaction with ribonucleic acids (RNA) (PubMed:29915238).  
n of the target mRNA. The RefSeq represents the predicted microRNA stem-loop. [provided by

rine-threonine kinase. The activated receptor type-2 then phosphorylates and activates the typ

ired for normal hematopoietic stem cell engraftment in the bone marrow (PubMed:24740813). |

to sites of DNA damage. May function as a transcriptional regulator. Inhibits lipid synthesis by blocking activity. In concert with NPM1, regulates centrosome duplication. Interacts with the TREX-2 complex and internalization. May be functionally coupled with the E2 ubiquitin-protein ligase UB2D3. In a

cell extensions and promoting filopodial protrusions. Involved in the regulation of processes such

as spacer of conserved recombination signal sequences (RSS) (By similarity). Proposed to be involved

in (TLR) signaling, is phosphorylated by IKBKE and TBK1 kinases (PubMed:22394562, PubMed:19111111) increasing the dissociation rate.

$\gamma$  degrades inherently unstable mRNAs containing AU-rich elements (AREs) within their 3' untranslated regions. It is involved in the specific excision of introns in specific transcription subsets. Involved in the establishment and maintenance of the 20S-PA28 complex.

peptides (20S-PA28 complex).

complex is necessary for the recruitment of RHNO1 to sites of double-stranded breaks (DSB) caused by DNA damage.

that are involved in nucleotide excision repair and is required for this mechanism of DNA repair. Alternatively spliced transcript variants encoding different isoforms have been found for th

A2 /EAAT2, SLC1A1/EAAT3, SLC1A6/EAAT4 and SLC1A7/EAAT5, amino acid transporters: 3

tein 5A, has an antiviral activity towards that virus.

synaptic cleft, which is essential for terminating the postsynaptic action of glutamate (By simila

ging (PubMed:20798282). Plays also a role in the regulation of the dopamine neurotransmissio

l repression, repression of switch recombination to IgA and regulation of telomere length. Comp

ided by oxLDL- or amyloid-beta 42-binding to CD36. This event induces the formation of a hete

DNA crossover formation in cells. Has DNA decatenation activity (PubMed:30057030). It is rec

its deadenylase CNOT7 (and probably the CCR4-NOT complex) via association with CNOT1,



cognizes and binds H3K14ac and H3K27ac on the promoters of actively transcribed genes and thyronine (T3) and thyroxine (T4) across the cell membrane (PubMed:11564694, PubMed:12225

essential for the extracellular hydrolysis of S1P and subsequent conversion into intracellular S1P

!, PubMed:17296725, PubMed:26344098, PubMed:30356214). In response to double-strand b

s a tumor malignancy-associated factor by promoting tumor invasion and metastasis under reg

nt of the CSA complex promotes the ubiquitination of ERCC6 resulting in proteasomal degradat  
2). In addition to its protein deacetylase activity, plays a key role in the degradation of misfolded

Acts also as a PRKN modifier that accelerates its degradation, resulting in a reduction of PRKN

stress induction, inhibits mammalian target of rapamycin complex 1 (mTORC1) association and re

elta3 and Pol-delta4 process Okazaki fragments in vitro, Pol-delta3 may also be better suited to  
differentiation by phosphorylating HAND1, leading to disrupt the interaction between HAND1 and I

direct KAT7/HBO1 specificity towards H3K14ac, while complexes containing JADE (JADE1, JA

similarity). Although it is able to AMPylate RhoA, Rac and Cdc42 Rho GTPases in vitro, Rho G

γ degrades inherently unstable mRNAs containing AU-rich elements (AREs) within their 3' untra

transferase (HMT) complexes. However, this function has been questioned (By similarity). Prom

neural progenitors its LINC complex association with SUN1/2 and probable association with cyto

chrome  $\gamma$  degrades inherently unstable mRNAs containing AU-rich elements (AREs) within their 3' untranscribed (some distal) complex, a complex recruited to centromeres which is involved in assembly of kineto

by mediating the conversion of monomethylarsonous acid (3+) into the less toxic dimethylarsc

an mitochondrial S18 proteins are no more closely related to each other than they are to the prc

of tubulin release (PubMed:27306797).

E1-like enzyme) facilitates this reaction by forming an E1-E2 complex with ATG3. Promotes pri

ition (PubMed:19039327). Acts as transcriptional cofactor for nuclear hormone receptors. Inhib

of the circadian target genes such as PER2 itself or PER1, contributes to the conversion of loca

vage of bubble structures. Interacts with the structure-specific MUS81-EME1 endonuclease and

CAF15) complex, a cullin-4-RING E3 ubiquitin-protein ligase complex that mediates ubiquitination



92333).

ubMed:23085020). In the complex, it mediates the interaction with microtubules (PubMed:1928

ippo pathway by association with LATS1 and modifying LATS1-dependent phosphorylation and

diates. Exhibits a weak sequence preference for incision between two G residues that reside in  
allowing antigen sampling, loading and presentation during T-cell activation. Involved in Arp2/3

n of the target mRNA. The RefSeq represents the predicted microRNA stem-loop. [provided by

n of the target mRNA. The RefSeq represents the predicted microRNA stem-loop. [provided by

fate transport in male germ cells.

chains on RIPK1 and catalyzes the formation of 'Lys-48'-polyubiquitin chains. This leads to RIP  
} molecules bind to IL2R beta (IL2RB) and gamma chain (IL2RG) subunits inducing the tyrosin

nucleotide cycle consumes aspartate and releases fumarate in a manner involving fatty acid ox

through regulation of apoptosis, cell proliferation and cell division (By similarity). Also is require  
f PCNA is involved in error-free pathway and employs recombination mechanisms to synthesiz

n of the target mRNA. The RefSeq represents the predicted microRNA stem-loop. [provided by

ays a role in mitotic spindle formation by serving as a physical scaffold to help deliver the RAN

ouse ortholog, not activated by Bacillus anthracis lethal toxin (PubMed:19651869). It is unclear

.. May be a tumor suppressor by mediating apoptosis resistance of cancer cells.

n of the target mRNA. The RefSeq represents the predicted microRNA stem-loop. [provided by

Mediates the responses to cytokines and growth factors in hematopoietic progenitors, platelet: regulation of cell shape. Promotes Rho-dependent reorganization of the actin cytoskeleton in neu

PubMed:17409436).

ty).

es which are involved in endocytosis regulation such as

o phosphorylates the 5'-terminus of exogenously introduced short interfering RNAs (siRNA

!C1 signaling upon genotoxic stress (PubMed:18692468). Has an alkylhydroperoxide reductase

/ RefSeq, Sep 2009]

olypeptides is regulated

/ RefSeq, Sep 2009]

ation is also important for a proper regulation of mechanisms such as TGF-beta signaling, cell

opolypeptides is regulated

ity, learning and memory (By similarity).

.KT1 signaling pathway. Plays a role in the regu

/ RefSeq, Sep 2009]



e transcription factor GLI2, and hence regulates endochondral ossification (By similarity). Acts

ly of kinetochore proteins, and as a consequence required for progress through mitosis, chrom

23955301). Suppresses chromosome congression in NDC80-depleted cells and co  
cell immunity against chlamydia.

ads to release of heterochromatin component CBX5/HP1A, enabling chromatin reor

/ RefSeq, Sep 2009]

TP53-mediated apoptosis. Phosphorylates CHEK2 in response to DNA damage

/ RefSeq, Sep 2009]

slating changes in slit diaphragm str  
not to damaged oligonucleotides (PubMed:10734143, PubMed:19609301, PubMed:20649465)  
) the intracellular space in cortical neurons.  
and regulates cell-cell contact. Phosp

induction through p38 MAPK signaling pathway (PubMed:23935096). In

et gene promoters and activates their transcription (PubMed:28602820).

osphorylates RAF1 inhibiting its kinase activity (PubMed:2

AV:ITGB3 or ITGA6:ITGB4. Its binding to integrins and su

odimer to a direct repeat of the core motif spaced by two nucleotides (Rev

obably implicating recruitment and activation of DNA po

ted current that occludes long term depression. Required for procentri

imilarity). Mediates myocardial contractility

component of MHF and CENP-T-W-S-X complexes, binds DNA and bends it to form a nucleos

Form 5]: Attenuates the ability of transcription factor H

enes and play important roles in embryonic deve

1632057, PubMed:16337594, PubMed:17290220, PubMed:19098711, PubMed:19219073, Put

adherence to surfaces coated with ICAM-1, a ligand for beta-2 integr

lay play a role in sister chromatid cohesion (PubMed:18172165

the repressor domain are more active than isoform

rotein complex that has the capability to ki

[ RefSeq, Sep 2009]

NF-kappa-B. Linear

ion promotes subsequent targeting of the gamma-tubulin ring complex (gTuRC) to the centrosome (14515). AURKB phosphorylates the CPC complex subunits BIRC5/survivin, promoting mitotic progression, hydrogenic commitment and suppresses fatty acid oxidation (By similarity). Acts

ty). Positively regulates HAMP transcription

[ RefSeq, Sep 2009]

ent mechanism. Can reduce cell migration by regulating the expressi

oligomeric enrichment of AUKRB in prometaphase.

metaphase chromosomes dispersed (Probable).

phosphorylates WWOX on 'Tyr-287'. Phosphorylates MCF2, thereby e

found in non-neuronal cells (PubMed:123995

PubMed:11705987, PubMed:16260596, PubMed:12944386). Also functions as the substrate reco

moves to the nucleus where it modulates the transcription of the TGF-beta-regulated

and degradation of the receptor. Activated KIT promotes phosphorylation

of TRIB3, IL6, IL8, IL23, TNFRSF10B/DR5, PPP1R15A/GADD34,



NGF (PubMed:27445338).

glucose through the PKB/AKT signaling pathway (PubMed:29168081). Also i

ists is required for phosphorylation of RELA at 'Ser-276' during oxidative stress

/ RefSeq, Sep 2009]

ediating the ubiquitination of target

/ RefSeq, Sep 2009]

æ for cancer immunotherapy (By similarity).

/ RefSeq, Sep 2009]

inhibits T cell proliferation and cytokine production through inhi

ormal cytokinesis during mitosis (PubMed:17635935). Required for cortical

/ RefSeq, Sep 2009]

cancer, it has been described as promoter of cell proliferatio

participates in the coordinat

[ RefSeq, Sep 2009]

like FANK1 to regulate apoptosis (PubMed:14765135, PubMed:

ly checkpoint is activated and inhibits the ubiquitin ligase activity of

ators, such as ZNF207, from liquid-unmixed organelles where they a

IOS; anti-proliferative response, such as p53/TP

rown RNA substrate. The complex co

macrophages (By similarity). Macrophage phagocytosis is stimulated by APO

1-specific, single strand-specific nuclease

1 transduction and intercellular transmission of polarity information during ti

[ RefSeq, Sep 2009]

of HSP90AA1/Hsp90: inhibits the ATPase activity of HSP90AA1/Hsp90, leading to activation of mitotic centromeres (PubMed:21346195). Controls the kinetochore localization of

iphosphate (dITP) as well as guanosine diphosphate (GDP), deoxyguanosine diphosphate (dG

ates with a linoleoyl acyl chain at the sn-2 position but much less effi  
during neurite extension. Important for microtubule formation and/or stabiliza

his transition is crucial for mismatch repair. MutS alpha may als  
and 11 that defines prostaglandins. The insertion of a second molecule of O<sub>2</sub> (bis-oxygenase

angs to form base pairs. It then extends each strand from the base-paired region using the o

[ RefSeq, Sep 2009]

une response via inhibition of AKT1 signaling pathway by forming a complex

effector of p53/TP53-dependent repression by medi

[ RefSeq, Sep 2009]

rage stress, mediates p53-induced inhibition of myocyte mitophagy through ROS

1 with STK3/MST2, activates the transcriptional activity of

rade transport, which is essential for subsequent BDNF-trig

TCA-3' preceded by an A/T-rich 5' sequence (RevRE), or as a homodimer to a d

ECAB3 and NPM1. Essential for localization of MAD2L1 t

/ RefSeq, Sep 2009]



↓ SQSTM1/p62 and subsequent inactivation of the BCR(KEAP1) complex, leading to NFE2L2/↑

zing hormone (LHB) in the pituitary (By similarity). Regulates t

tivity-dependent synapse elimination in the developin

ie morphogenesis.

, NCL, NUCKS1, NPM1/numatrin, ORC1, PRKAR2A, EEF1E1/p18, EIF3F/p47, p53/TP53, NOI

ar phosphatase activity, allowing the hydrolysis and the cellular uptake of these b

.||[Isoform Alpha-C2]: Has transcriptional activation activity.||[Isofo

members upon activation; this leads to the pho

l:23230272, PubMed:28525742). In response to DNA damage, PARP9-DTX3L complex is req

è completion of the chaperoning process, properl

teins CEP290, RPGRIP1L, TMEM67 and B9D2, and of IFT20 foll

è at abasic sites, but does not have any lyase activity, preventing the release of the 5'-de

id anti-tumor immune response (PubMed:23761635). In the context of bacterial i

cells. This mechanism acts through the growth factor r

cts of condensation of 5-amino-6-D-ribityaminouracil (5-A-RU) with glyoxal or meth

r of the mTORC1 signaling pathway by promoting, through SLC27A1, th

it the mobility of LTR and non-LT

and ATOH1 which involves ARID1A, indicative for the participation of a distinct SWI

ing in response to viruses containing a dsDN

regulation of the PI3K-AKT-mTOR pathway, controls cell proliferation,

y via an indirect effect on the expression levels

in tumor development (PubMed:10564580).

osphorylated ssRNAs and dsRNAs but also short dsRNAs (<1 kb in l

isol (PubMed:21947006, PubMed:23258412, PubMed:23707065, PubMed:23722158, PubMec

ass A receptors, like ADRB2, OPRM1, ENDR

stimulation by promoting STAT6 phosphorylation (PubMed:27796300). Mono-ADP-ribosylates I

ion. Isoform 1 is a more potent viral inhibitor t

ase-activating protein TBC1D17 during Rab8-mediate

ed for T-cell receptor (TCR) signaling. Mediat

emodeling, positively regulates STAT1-dependent interferon-stimulated gene transcription and

E-cadherin transcription. Acts as a hyp

ligase complexes which mediate the ubiquitination and subsequent proteasomal degradation of

response by activating STAT1, which selectively induces

kinase regulatory subunits by AXL leads to the downregulation of the I-kappa-B family. In a conventional

hypothalamic-pituitary-gonadal axis at puberty and in adulthood

endosome. Involved in several receptor-mediated signaling pathways

YNE1/KASH1 LINC complex may tether spermatid nuclei to posterior centrosomes. Involved in alternative splicing, phosphorylation, and protein stability



and inhibits the reorganization of the actin cytoskeleton, formatio

ay act as a negative regulator of lactation, stopping lactation  
left lateral plate mesoderm (LPM). Plays

of the BAF complex, a multiprotein complex involved in transcriptional a

and thus its transcriptional activation activity (P  
progression to cytokinesis during mitosis.

reintegration complex) and export of GAG polyprotein and viral

re their electrons from NADH (By

ation of osteoclast precursors, macrophage programming, p  
re regulation of mRNA turnover (PubMed:11585831). Cleave

seems to have additional function.

oant in signaling sequences that

1 by N-tropic murine leukemia virus (

the ligand-induced RXRA and NR1H3/LXRA transactivation activity (PubMed:19786558). Ma  
PubMed:18611980, PubMed:23666920).||Prelamin-A/C can accelerate smooth muscle cell se

OX2-mediated prostaglandin E2 (PGE2) expressio

is and LRRTM family members (PubMed:26

y of LTR and non-LTR retrotransp

endoplasmic reticulum and subsequent peptide loadi

hen promotes protein synthesis by phosphorylating PDCD4 and targeting it

on by monocytes (PubMed:11276205). Involved in hematopoiesis and in cardiac ventricular

vascular circuit development. In addition to its role i

ough the transcription of COL1A1, and possibly COL

) pathways, leading to the mobilization of transcription factors tha

ta-cells via its protease inhibitory function (PubMed:

tes IRF8 ubiquitination, which enhanced the ability of IRF8 to stimulate cytokin

karyocytes differentiation.

seem to be, at least in part, contributed by the association of

a major target for aut

ity). In vitro modulates alpha-3:beta-4-containing nAChR

transcription activity (PubMed:28065600). Involved in cell cycle regulation by inducing  
d:12860994, PubMed:18209100). The ESCRT machinery also func

kinetochore localization of MAD2L1 during the pro

/ RefSeq, Sep 2009]

tor control. Stimulates the binding a

/ RefSeq, Sep 2009]

ri-miRNA are required for its binding (PubMed:15531877, PubMed:15574589, PubMed:155891

ation of histone H3 at 'Lys-36' (H3K36Ac) in the context of nucleosomes (PubMed:3065

oBAF complexes which contain ACTL6A/BAF53A and PHF10/BAF45A, a

ning (NHEJ), thereby promoting the homologous recombination (HR)-mediat

RAS and KRAS). Acts downstream of the heterotrimeric G-protein beta/g

biquitin Lys residues, except 'Lys-48'-linked polyubiquitination (Pu

oy retina and signals directly to the S

eral membrane of epithelial cells. May increase the amplitude of ASIC



id TNFR2) and transcription factor (REL) (By similarity). Inh

/ RefSeq, Sep 2009]

riptional activator activity of JUN (PubMed:28289210).

/ RefSeq, Sep 2009]

clude HOXC8, HOXA9, MYT1, CDKN2A and retinoic acid target genes. EZH2 can also methylate

/ RefSeq, Sep 2009]

d trimethylation of 'Lys-20' of histone H4 (PubMed:28114273). Ma

ind gamma-globin genes regulation during erythroid differe

e BNC reduces molecular oxygen to 2 water molecules using 4

oy retina and signals directly to the S

; association with nuclear DLG1, thereby causing dissocia

oy retina and signals directly to the S

ence 5'-TGACAG-3'in the activator ACT sequence of the D

[ RefSeq, Sep 2009]

independent of ruffling. Involved in th

in the fine-tuning of inhibitory synaptic transmission (PubMed:9844003). Pre-synaptic GABA re

[ RefSeq, Sep 2009]

PubMed:9425121, PubMed:10358058, PubMed:17472963). In an alternative pathway of eicosan

1, an inhibitor of asparagine-link

oy retina and signals directly to the S

cancer in multiple d

the replication protein A (RPA) or the cohesion CTF18-replication f

/ RefSeq, Sep 2009]

JLK1 kinase complex to the phagophore which leads to autophagosome formation (PubMed) complex along with CREST plays a role regulating the activity of gen

/ RefSeq, Sep 2009]

/ RefSeq, Sep 2009]

/ RefSeq, Sep 2009]

2013]

oxylated E1 and E2 at the C15-alpha and C16-alpha positions (PubMed:11555828, PubMed:1

/ RefSeq, Sep 2009]

/ RefSeq, Sep 2009]

/ RefSeq, Sep 2009]





/ RefSeq, Sep 2009]

/ RefSeq, Sep 2009]

y similarity).

PubMed:17596519). Participates in dendritic cell endocytosis

ent manner through activation of Rac1. Osteostatin is a potent inhib

e BNC reduces molecular oxygen to 2 water molecules using 4

ment and can then be subjected to somatic hypermutations whic

y).

izes the hydrolysis of 1-O-alkyl-2-acetyl-sn-glycero-3-

-dependent transcription through interaction with PKN1  
for the formation of the 9-1-1 complex.

35, PubMed:20421648). Also mediates immune tolerance:

ites to intracellular pH regulation in the duodenal

ing axons.

[ RefSeq, Sep 2009]

(PubMed:26166670). Plays a protective role in early postimplantation embryos. AP-2 seems to play a role in the recycling

endothelial autophagy independently of its enzymatic activity

chromatin at gene promoter regions

programming adaptation

in a TP53-dependent manner (PubMed:15102863). Plays a role in granulosa cell apoptosis

after PMA treatment in a p38 MAPK-dependent manner (PubMed:25106868). Positively regulates  $\epsilon$

cytoskeleton reorganization essential for cell migration and adhesion (PubMed

normal cell cycle progress and normal cytokinesis (PubMed:17495026, Pu  
leads to condensation of actin stress fibers into thick bundles. Involves  
degradation and polyadenylation of pre-mRNAs. Component of the tRNA-sp

cellular motility and migration. Acts as  
regulator of several aspects of development including angiogenesis

ve role in airway epithelium, but also shown to compromi  
lase activity, exhibiting the ability to hydrolyze the prolyl bond two residues from the N-terminus

nus and therefore lacks several phosphorylation sites. Mediate  
it diaphragm (an essential part of the glomeru

ed:27084452). Inhibits CDH1-mediated cell adhesion in process independent from Rho activat

i-mediated apoptosis. Phosphorylation of ST13 regulates internalizat  
vation of Toll-like receptors (TLRs) an

criptional activity of nuclear hormone rec

expression and increased induced regulatory T (iTreg) cell stabilit

SOX2 (By similarity). Involved in epithelial to mesenchymal transit

breast milk and mucosal secretions

ent, MET signaling plays a role in gastrulation, develop

u, respectively), but with lower affinity than crotonylated histone H3 (PubMed:25417107, PubM

γ retina and signals directly to the S

ary fatty acid amide and glyoxylate (By similarity).

ytic cells; PECAM1-mediated detachment signal appears to be disable  
uired for the preservation of coc

ct forms of PLTP exist in plasma: an active form that can t

deficiency. Required for the differentiation of

of TNF, interferon alpha and interferon beta (PubMed:

ocyte progenitor cells (By similarity). C-terminal processed forms

cytoplasmic domains. Plays an impo



induction, they regulate the leptin receptor/LEPR in th

of apoptotic cells (PubMed:29162624).

nal activation or repression (PubMed:25849773).||D

involved in cell differentiation, apoptosis, immune response and regulation of K(+)

ion. Regulates endocytosis and cell migration in neutrophils.

PPL1-containing endosomes and in degradative but not recycling trafficking

ing histone-lysine N-methyltransferase EHMT2 recruitment and H3K9 dimethylat

ng RAC1 or RAC2, MAP3K11/MLK3 or MAP3K7/TA

ration and invasion through the extracellular matrix (PubMed

provided by oxLDL- or amyloid-beta 42-binding to CD36. Thi

aining ERM proteins (EZR; MSN and RDX) and MYL9 activation through associ  
ve splicing and influences mRNA splice site

serve as an adapter for UPF1 to protein phosphatase 2A (PP2A), thereby triggering UPF1 dephosphorylation

suppresses LINE-1 retrotransposon activity (PubMed:24035396, PubMed:29610582, PubMed:242173)

recruits ULK1 and PI3 kinases (PubMed:28561066). Once activated, WIPI2 recruits at phagophore

as T-cell responses and the release of cytokines

f inflammasomes is mediated by the pyrin and CARD domains and

may also play a role in cell proliferation and apoptosis by positively regul

cell death.

are preferentially recognized via a LXXLAP motif.

odeling, promotes the migration of endotheli

: fusion events necessary for transport to lysosomes. Induces lysosomal vesicle forma

ubiquitination and degradation of SUFU, allowing the release of GLI1 from SUFU for p

phosphorylation of complex I subunit NDUFA10 (By similarity).

ates the inhibition (By similarity).

ditional evidences are requi







1 of the kinase. Essential for activated phospho-MLKL to oligomerize and local

9, PubMed:20628055). It is the ceramidase that controls the levels of circulating sphi

scription of specific genes and the

nation of neuromuscular synapses through MUSK, inhibits PDGFR

ing results in multiple transcript

α(s).

neuronal adhesion and axonogenesis. In

are structural integrity in embryonic stem cells which pr

ange of adaptive neuronal responses including long-term potentiation (LTP

ceptor for oligomannosidic glycans. In vitro, promotes outgrowth of astro  
virus (EBOV) and marburg virus (M

ure T cell precursors. CBF complexes repress ZBTB7B transcription facto

differentiation by  
role in rRNA transcription and/or maturation. Intera

. Intracellular forms interact with ubiquitin and SCF (SKP1-CUL1-F-box protein) E3 ubiquitin-pro

tivity is subject to debate. According to various reports, th

rowth factors, neuropeptides and pe

rtiated CD4(+) T cells and may be involved in induct

ices RPS6KA1 and CREB1 activity and contributes to the regulation of trans

ane domain, such as isoform

erived chemokines and their subsequent presentation to circulating I

similarity). Also promotes epithelial cel

ing to its degradation mediated by ubiquitin/proteasomes. Phosphory

a, the trifunctional enzyme subunit alpha/HADHA also has a monolysocardioliip

iponent of a RCOR/GFI/KDM1A/HDAC complex that suppre

transport of mitochondria in neurons during hypoxia.

in human populations, presents immunodominant viral epitopes derived from IAV M/matrix pro  
at position 2 and mainly hydrophobic amino acids Leu, Ile or Val at the C-terminus. Associated

methytransferases. Also acts as a transcriptional repressor (LIMK1). Heterodimeric channels containing KCNK1 and KCNK2 have much higher activity, a

0460, PubMed:23633677). In this way LIMK1 regulates several actin-dependent biological pr

vents rapid EGFR endocytosis and prolongs EGFR signaling. Required for

stress by regulating the activity of GSK3beta

a membrane to specific cellular targets (B

held in the cytoplasm in an inactive s

ear sequestration of viral polymerase (P3D-POL) with

osphorylating NFAT and promoting its nuclear translocation (PubMed:26248042). Dephosphor  
e lagging and leading strand, respectively (By similarity). In the primase co

horylated growth-suppressive form of RB1 and i

vnstream targets.

pecific low-molecular mass non-enzymic proteins, they part

hereby modulating cell cycle progression and ce

egrin signal transduction, but also in signaling do

1:19615464, PubMed:22605381, PubMed:22825852). Promotes keratinocyte differentiation, immunoglobulin heavy chain class-switch recombination, promotes microhomology-mediated alternative splicing (PubMed:12411430).

Directly on the transcription regulation of several genes by phosphorylating GSK3B at 'Ser-9'

(PubMed:10903140, PubMed:12117417, PubMed:12225859, PubMed:30867591). Required for

neural progenitors exit mitosis and differentiate into neurons, npBAF

the expression of the target genes, inducing a cellular anti

apoptosis (PubMed:12411430).

translocates to the nucleus where it modulates the transcription of the TGF-beta-regulated genes. It is involved in its shuttling to the nucleus (By similarity)

targeting RNA p21 (lincRNA-p21) and lincRNA-Mkln1. Lin



ence. Acts synergistically

also function as an endocytic receptor. Not re

tenone and 4-oxo-trans-2-nonenal (in vitro) (By similarity).

of HEPACAM2/MIKI (PubMed:22864114). May also regulate vesicle trafficking and modulate

way mediated by PRKCA (PubMed:16757564, PubMed:2172458

cell proliferation of melanoma cells and promotes their apoptosis in a cAMP-inde

rd T cell lineage commitment. Required

in muscular differentiation (PubMed:12163359). Plays an indispensable

cell death BAD. Alternativel

ormal formation of lamellipodia (By similarity). Required for

nation of membranes and of pulmonary surfactant (By similarity).

omplex functions (PubMed:24793695).

Med:23708001, PubMed:16921029). Plays a role in genome integrity preservation by coordina

ulation of cardiac muscle cell prolife

ing m6A methylation (PubMed:16129689). Inhibits pre-mRNA splicing (PubMed:2104

ubiquitinated BRCA1 leads to the inhibition of the E3 ubiquiti

As involved in cell proliferation, including cell cyc  
it stimulating already phosphorylated catalyt

activation of canonical Wnt/beta-catenin target genes. Negative regul

ventral lip to the limb buds through the  
dependent manner (By similarity). Plays also a role in the biogenesis of U3

h its 3'-5' exonuclease activity, which efficiently processes double-stranded D

meshifting (-1PRF). Does not bind to ribosomes.

endosome-to-plasma membrane transport for cargo protein recycling.  
ie. Required for the formation of the ATP8A2, ATP8B1 and ATP8B2 P-

after DNA damage (PubMed:26287480). Protects cells again

γ retina and signals directly to the S  
lgi network and vesicles in the cell periphery; the function i  
vesicle extrusion and/or membrane fission activities, possi

triggers apoptosis by activating the JNK1 pathway (By similarity). Phosphorylates mTORC1 co

ners and represses the ligand-induced RXRA/B/G, NR1H3/LXRA, NR1H4 and VDR transactiva

which is different from canonical E2 recog

OCE activity (PubMed:28219928). Involved in B-lymphocyte chemotax

driven cell growth and migration (PubMed:26895380). Protects cells from oxidative stress-induc

neural tube.



key role during gametogenesis (By similarity). Stabilizes MCM9 protein (PubMed:23401855, Pi

1 also amplify Wnt signaling pathway independently of LGR4-6 receptors

cellular glycosylation processes (PubMed:25354954). Required to link T-cell antigen rec

omplex that acts as a cytoplasmic sensor of viral double-stranded RNA (dsRNA) and pl

related virus (XMRV) and s

wing ATF4-mediated reprogramm

.  
/ RefSeq, Sep 2009]

e-1 receptor such as ACVR1B. Once activated, the

Mediates attachment of dendritic cells onto endothelial cells via homotypic in

binding to inactive phosphorylation  
complex (transcription and export complex 2) subunits PCID2 and SEM1,

association with CBL, required for proper function

involved in axonal filopodia growth, stereocilia

involved in the innate immune response to nucleic acids by acting as a promoter

(PubMed:25636800, PubMed:27302953). This induces a conformational change, leading to its

translated regions, and in RNA surveillance pathways, preventing translation  
maintenance of epithelia cell-cell adhesion. Potential

occurring during the S phase (PubMed:21659603). Isoform 1 possesses 3'->5' double

(PubMed:7697716). Plays also a role in base excision repair (BER) is gene. [provided by RefSeq, Mar 2

SLC1A5/ASCT2, SLC38A1/SN1 and SLC6A19, creatine transporter: SLC6A8,

ity). Contributes to glutathione biosynthesis and protection against oxid

in by associating with the dopamine transporter (DAT1) and thereby mo

ponent of the eNoSC (energy-depe

rodimer of TLR4 and TLR6, which is rapidly internalized and triggers inflamma

quired for mtDNA decatenation and segregation after

and hence promotes ARE-mediated mRNA deadenylation (PubMed:23644599). Functions als

d recruits NuA4-related complex to deposit H2AZ1/H2A.Z (PubMed:29437725). H2AZ  
;859). When associated with LAPTM4B, the heterodimer formed by SLC3A2 and SLC7A5 is re

⤴ (PubMed:17379599). Involved in the regulation of inflammation, platelets activation,

reaks (DSBs), accumulates at DNA damage sites and promotes homologous recombination r

ulation and phosphorylation by AKT1. Suppresses Fas-induced apoptos

ation. Recruits the E2 ubiquitin-conjugating enzyme CDC34 to the complex and brings it  
d proteins: when misfolded proteins are too abundant to be d



l activity, influencing the balan

recruits the mTORC1 component RPTOR to stress granules (SGs), thereby preventing mTORC

o fulfill this task, exhibiting near-absence of strand displacement activity  
MDFIC and activate HAND1. Phosphorylates

ADDE2 and JADE3) scaffold direct KAT7/HBO1 specificity towards histone H4 (PubMed:1918776

TPases do not constitute physiological substrates (PubMed:

anslated regions, and in RNA surveillance pathways, preventing translation

notes ubiquitination of PCNA following UV irradiation and may regulate re

oplasmic dynein-dynactin motor complexes functions to pull the

anslated regions, and in RNA surveillance pathways, preventing translation  
ochore proteins, mitotic progression a

onic acid (PubMed:21193388, PubMed:25997655). It however only plays a limited

okaryotic S18 proteins. Pseudogenes correspondin



primary ciliogenesis by removing OFD1 from centriolar satellites via the auto

mits the induction properties of several steroid receptors suc

al chromatin to a heterochromatin

d promotes the cleavage of 3'-flap and replication fork-li

on and degradation of target proteins (PubMed:16949367, PubMed:31452512). The DCX(DCA





39083, PubMed:23085020).

d localization of WWTR1/TAZ (PubMed:21555462).

a T-rich region of DNA (PubMed:28049850). Has also e  
complex-dependent actin assembly driving Sa

[ RefSeq, Sep 2009]

K1 proteasomal degradation and consequently termination of the TNF- or LP  
e phosphorylation of both receptor subunits on th

idation and ATP-citrate lyase activity (PubMed:31978345). Participates in pattern

id for chromosome congression and alignment durin  
e across the lesion (PubMed:24695737).

[ RefSeq, Sep 2009]

effector molecule TPX2 to microtubules (PubMed:18591255). May counterac

whether isoform 2 is involved in inflammasome formation. It is not cleaved within the F

[ RefSeq, Sep 2009]

s, erythrocytes, and in mature myeloid cells,  
ironal cells and neurite retraction (PubMed:26091040). Promotes

è acti

cycle progression, DNA repair and cell

also as a transcriptional core

osome segregation and cytok



). This feature is prop

ome-like stru



Med:19837670,

ome, an important step for



ognition module for the DCX (DDB2-CUL4













DP

activity) yield





NR



NO/p54NRB, PAPOLA, PLEC/plectin, RB1, TPPP,

aired for efficient non-homologou





l:26229117, Pu

PARP

thus STA

of target proteins (PubMed:1473946









inescenc





161,









receptor

acid biosynthesis





4559847, PubMed:12865317, PubMed:1













early adipogenesis by prom



s of

ion (PubMed:11976333, PubMed:1

e











osphorylatio

94). Not able to restrict in

















0

rotein 1 (GILGFVFTL),  
with succe



ylates an

tive end joining (A

or targeting of SLC7A5 and SLC7A8 to the plasma membra

the subcellular









iting DNA replication



mpl

atio

ced a

ubMed













o by recruiting components of the cytop

recruited to

1 hyper

36, P













(F15) complex act
