# Supplementary material for: Transcriptomic profiling and pathway analysis of cultured human lung microvascular endothelial cells following ionizing radiation exposure
Source: PubMed Central journal article supplement (PMC8688546; doi:10.1038/s41598-021-03636-7), 2021-12-20
Supplement: 41598_2021_3636_MOESM2_ESM.pdf [file 41598_2021_3636_MOESM2_ESM.pdf]

## EndMT focused heatmaps

| EndMT  | 2 hr   | 4 hr   | 6 hr   | 8 hr   | 24 hr  | Name                                                            |
|--------|--------|--------|--------|--------|--------|-----------------------------------------------------------------|
| PLAU   | 0.655  | 0.743  | 1.531  | 1.733  | 4.057  | Plasminogen Activator, Urokinase                                |
| BMP2   | 0.568  | 0.699  | 0.78   | 0.88   | 3.549  | Bone Morphogenetic Protein 2                                    |
| CXCR4  | -0.328 | 0.669  | 1.207  | 1.198  | 3.156  | C-X-C Motif Chemokine Receptor 4                                |
| PLAT   | 0.286  | 0.133  | 0.307  | 0.919  | 3.139  | Plasminogen Activator, Tissue Type                              |
| SELE   | 1.765  | 1.732  | 0.2    | -0.316 | 2.629  | Selectin E                                                      |
| ICAM1  | 0.116  | 1.137  | 0.956  | 0.963  | 2.611  | Intercellular Adhesion Molecule 1                               |
| LAMC2  | 0.301  | 0.138  | 0.436  | 0.755  | 2.528  | Laminin Subunit Gamma 2                                         |
| ACTA2  | 0.589  | 1.186  | 1.511  | 1.996  | 2.44   | Actin Alpha 2, Smooth Muscle                                    |
| JUP    | 0.184  | 0.078  | 0.302  | 0.906  | 2.285  | Junction Plakoglobin                                            |
| CDH11  | 0.058  | 0.173  | 0.157  | 0.536  | 2.215  | Cadherin 11                                                     |
| SMAD3  | 0.35   | 0.642  | 0.889  | 0.778  | 1.727  | SMAD Family Member 3                                            |
| ETS1   | 0.681  | 0.683  | 0.691  | 0.738  | 1.723  | ETS Proto-Oncogene 1, Transcription Factor                      |
| NID2   | 0.549  | 0.329  | 0.038  | 0.325  | 1.658  | Nidogen 2                                                       |
| SOX7   | 0.015  | 0.482  | 0.322  | 0.495  | 1.643  | SRY-Box Transcription Factor 7                                  |
| MMP14  | 0.146  | 0.245  | 0.376  | 0.702  | 1.439  | Matrix Metalloproteinase 14                                     |
| ZNF703 | 0.299  | -0.096 | 0.079  | 0.434  | 1.358  | Zinc Finger Protein 703                                         |
| DAB2   | 0.268  | 0.172  | 0.338  | 0.612  | 1.317  | DAB Adaptor Protein 2                                           |
| CXADR  | -0.415 | -0.526 | -0.075 | -0.033 | 1.303  | CXADR Ig-Like Cell Adhesion Molecule                            |
| NT5E   | 0.158  | 0.006  | 0.086  | 0.525  | 1.245  | 5'-Nucleotidase Ecto                                            |
| FAP    | 0.212  | -0.016 | 0.023  | 0.274  | 1.235  | Fibroblast Activation Protein Alpha                             |
| CDH2   | 0.466  | 0.151  | -0.159 | 0.274  | 1.23   | Cadherin 2                                                      |
| FZD8   | 0.611  | -0.308 | -0.472 | -0.175 | 1.151  | Frizzled Class Receptor 8                                       |
| CDH5   | 0.296  | 0.123  | 0.162  | 0.555  | 1.134  | Cadherin 5                                                      |
| PECAM1 | 0.173  | -0.033 | -0.028 | 0.422  | 1.117  | Platelet And Endothelial Cell Adhesion Molecule 1               |
| VIM    | 0.342  | 0.131  | 0.061  | 0.442  | 1.098  | Vimentin                                                        |
| RGCC   | 0.21   | -0.079 | 0.149  | -0.071 | 1.078  | Regulator Of Cell Cycle                                         |
| CAV1   | -0.221 | 0.049  | 0.249  | 0.554  | 1.076  | Caveolin 1                                                      |
| CLDN5  | -0.447 | -0.406 | -0.143 | 0.22   | 1.07   | Claudin 5                                                       |
| TWIST2 | 0.002  | -0.308 | -0.21  | 0.097  | 0.991  | Twist Family BHLH Transcription Factor 2                        |
| COL5A2 | 0.165  | 0.155  | 0.097  | 0.521  | 0.914  | Collagen Type V Alpha 2 Chain                                   |
| SOX18  | 0.578  | -0.377 | -0.394 | -0.286 | 0.904  | SRY-Box Transcription Factor 18                                 |
| DDR2   | -0.259 | -0.089 | 0.141  | 0.004  | 0.877  | Discoidin Domain Receptor Tyrosine Kinase 2                     |
| BCL9L  | 0.22   | -0.204 | 0.229  | 0.47   | 0.817  | BCL9 Like                                                       |
| CD44   | 0.327  | 0.121  | -0.009 | 0.348  | 0.817  | CD44 Molecule (Indian Blood Group)                              |
| ICAM2  | -0.259 | -0.171 | 0.195  | 0.628  | 0.803  | Intercellular Adhesion Molecule 2                               |
| SPOCK1 | 0.332  | 0.159  | -0.02  | 0.379  | 0.801  | SPARC (Osteonectin), Cwcv And Kazal Like Domains Proteoglycan 1 |
| CD34   | -0.042 | 0.042  | 0.015  | 0.261  | 0.73   | CD34 Molecule                                                   |
| PRKCA  | 0.484  | 0.01   | 0.109  | 0.498  | 0.695  | Protein Kinase C Alpha                                          |
| PTK2   | 0.209  | -0.065 | 0.171  | 0.521  | 0.688  | Protein Tyrosine Kinase 2                                       |
| PLAUR  | 0.124  | -0.07  | 0.018  | 0.291  | 0.634  | Plasminogen Activator, Urokinase Receptor                       |
| DLL4   | -1.421 | -0.079 | -0.042 | 0.022  | 0.448  | Delta Like Canonical Notch Ligand 4                             |
| TGFBR1 | 0.838  | 0.422  | 0.084  | 0.017  | 0.349  | Transforming Growth Factor Beta Receptor 1                      |
| SNAI1  | 0.589  | 0.052  | 0.166  | 0.33   | 0.156  | Snail Family Transcriptional Repressor 1                        |
| PIK3R3 | 0.795  | -0.05  | -0.054 | 0.308  | 0.147  | Phosphoinositide-3-Kinase Regulatory Subunit 3                  |
| HEY1   | 1.199  | -0.237 | -0.721 | -0.516 | -0.154 | Hes Related Family BHLH Transcription Factor With YRPW Motif 1  |
| FGF2   | 1.11   | 0.858  | 0.306  | 0.435  | -0.171 | Fibroblast Growth Factor 2                                      |
| GATA2  | 0.703  | -0.471 | -0.245 | -0.038 | -0.682 | GATA Binding Protein 2                                          |
| CTGF   | 0.08   | 0.015  | -0.302 | -0.351 | -0.983 | Cellular Communication Network Factor 2                         |
| POSTN  | 0.212  | 0.188  | -0.047 | 0.307  | -1.011 | Periostin                                                       |
| TAGLN  | 0.268  | 0.042  | 0.149  | -0.09  | -1.029 | Transgelin                                                      |
| EGFL7  | -0.533 | -0.363 | -0.366 | -0.746 | -1.174 | EGF Like Domain Multiple 7                                      |
| FLT1   | 0.478  | -0.075 | -0.503 | -0.318 | -1.467 | Fms Related Receptor Tyrosine Kinase 1                          |
| HEY2   | 1.175  | -0.446 | -0.329 | 0.153  | -1.524 | Hes Related Family BHLH Transcription Factor With YRPW Motif 2  |
| BMP4   | -0.653 | -0.086 | -0.581 | -0.489 | -2.128 | Bone Morphogenetic Protein 4                                    |
| IGFBP3 | -0.076 | -0.008 | -0.263 | -0.119 | -3.927 | Insulin Like Growth Factor Binding Protein 3                    |
| IGFBP1 | -0.049 | -0.109 | -0.561 | -0.532 | -4.25  | Insulin Like Growth Factor Binding Protein 1                    |

Supplemental Table 2: Data used for the generation of focused heatmaps

## Cell cycle heatmaps

| Cell cycle | 2 hr   | 4 hr   | 6 hr   | 8 hr   | 24 hr  | Name                                                                         |
|------------|--------|--------|--------|--------|--------|------------------------------------------------------------------------------|
| CDKN2B     | 0.673  | 0.852  | 0.679  | 0.885  | 2.224  | Cyclin Dependent Kinase Inhibitor 2B                                         |
| CCND2      | -0.489 | 0.35   | 0.967  | 0.829  | 2.169  | Cyclin D2                                                                    |
| CDKN1A     | 2.376  | 2.121  | 1.81   | 1.717  | 2.078  | Cyclin Dependent Kinase Inhibitor 1A                                         |
| MDM2       | 2.096  | 1.75   | 1.922  | 1.397  | 1.909  | MDM2 Proto-Oncogene                                                          |
| GADD45A    | 1.233  | 1.076  | 1.153  | 0.88   | 1.778  | Growth Arrest And DNA Damage Inducible Alpha                                 |
| SMAD3      | 0.35   | 0.642  | 0.889  | 0.778  | 1.727  | SMAD Family Member 3                                                         |
| CCNA1      | -0.14  | -0.322 | -0.009 | 0.526  | 0.932  | Cyclin A1                                                                    |
| CCND1      | 0.182  | 0.036  | 0.269  | 0.607  | 0.925  | Cyclin D1                                                                    |
| GSK3B      | 0.301  | 0.177  | 0.169  | 0.422  | 0.762  | Glycogen Synthase Kinase 3 Beta                                              |
| TFDP2      | 0.182  | 0.011  | -0.198 | 0.043  | 0.655  | Transcription Factor Dp-2                                                    |
| HDAC1      | 0.241  | -0.041 | -0.027 | 0.089  | 0.612  | Histone Deacetylase 1                                                        |
| CDK6       | 0.442  | 0.3    | 0.078  | -0.058 | 0.605  | Cyclin Dependent Kinase 6                                                    |
| ABL1       | 0.452  | -0.128 | 0.075  | 0.424  | 0.59   | ABL Proto-Oncogene 1, Non-Receptor Tyrosine Kinase                           |
| YWHAQ      | 0.278  | 0.103  | -0.003 | 0.28   | 0.446  | Tyrosine 3-Monooxygenase/Tryptophan 5-Monooxygenase Activation Protein Theta |
| RBL2       | -0.215 | -0.142 | 0.09   | 0.169  | 0.443  | RB Transcriptional Corepressor Like 2                                        |
| PTTG1      | -0.427 | -0.578 | -0.465 | -0.255 | 0.147  | PTTG1 Regulator Of Sister Chromatid Separation, Securin                      |
| CCNB1      | -0.946 | -1.877 | -1.593 | -0.76  | -0.194 | Cyclin B1                                                                    |
| BUB1       | -0.659 | -1.189 | -1.047 | -0.361 | -0.228 | BUB1 Mitotic Checkpoint Serine/Threonine Kinase                              |
| PCNA       | 0.474  | 0.599  | 0.35   | -0.004 | -0.305 | Proliferating Cell Nuclear Antigen                                           |
| RBL1       | 0.429  | 0.244  | 0.032  | 0.082  | -0.307 | RB Transcriptional Corepressor Like 1                                        |
| CCNB2      | -0.564 | -1.02  | -1.08  | -0.587 | -0.315 | Cyclin B2                                                                    |
| TTK        | -0.795 | -0.904 | -0.851 | -0.191 | -0.319 | TTK Protein Kinase                                                           |
| CDC14A     | -0.01  | 0.315  | -0.54  | -0.833 | -0.401 | Cell Division Cycle 14A                                                      |
| CDC25B     | -0.455 | -0.642 | -0.403 | -0.207 | -0.433 | Cell Division Cycle 25B                                                      |
| MCM7       | 0.471  | 0.088  | -0.221 | -0.182 | -0.443 | Minichromosome Maintenance Complex Component 7                               |
| CCNH       | -0.108 | -0.048 | -0.111 | 0.008  | -0.469 | Cyclin H                                                                     |
| MCM3       | 0.445  | -0.035 | -0.519 | -0.464 | -0.506 | Minichromosome Maintenance Complex Component 3                               |
| CDK2       | 0.229  | 0.169  | -0.208 | -0.292 | -0.532 | Cyclin Dependent Kinase 2                                                    |
| E2F4       | 0.194  | -0.21  | -0.217 | -0.217 | -0.534 | E2F Transcription Factor 4                                                   |
| BUB1B      | -0.606 | -0.783 | -0.771 | -0.304 | -0.575 | BUB1 Mitotic Checkpoint Serine/Threonine Kinase B                            |
| WEE1       | -0.493 | -0.498 | -0.554 | -0.643 | -0.618 | WEE1 G2 Checkpoint Kinase                                                    |
| MCM4       | 0.538  | 0.034  | -0.495 | -0.496 | -0.635 | Minichromosome Maintenance Complex Component 4                               |
| PLK1       | -1.146 | -2.204 | -1.641 | -0.69  | -0.644 | Polo Like Kinase 1                                                           |
| CDC20      | -0.911 | -1.817 | -1.549 | -0.721 | -0.673 | Cell Division Cycle 20                                                       |
| CDK1       | -0.58  | -0.475 | -0.509 | -0.371 | -0.709 | Cyclin Dependent Kinase 1                                                    |
| CDKN1B     | -0.677 | -0.178 | -0.237 | -0.16  | -0.719 | Cyclin Dependent Kinase Inhibitor 1B                                         |
| CCNA2      | -0.504 | -0.78  | -0.736 | -0.267 | -0.755 | Cyclin A2                                                                    |
| MCM6       | 0.583  | 0.067  | -0.575 | -0.527 | -0.765 | Minichromosome Maintenance Complex Component 6                               |
| MCM5       | 0.449  | 0.034  | -0.409 | -0.269 | -0.797 | Minichromosome Maintenance Complex Component 5                               |
| SKP2       | -0.319 | -0.282 | -0.331 | -0.302 | -0.812 | S-Phase Kinase Associated Protein 2                                          |
| CDC25A     | 0.825  | -0.142 | -0.686 | -0.819 | -0.874 | Cell Division Cycle 25A                                                      |
| DBF4       | -0.809 | -0.754 | -0.654 | -0.706 | -1.007 | DBF4 Zinc Finger                                                             |
| ORC6       | 0.22   | -0.2   | -0.572 | -0.876 | -1.053 | Origin Recognition Complex Subunit 6                                         |
| CDC6       | 0.76   | 0.119  | -0.487 | -0.553 | -1.115 | Cell Division Cycle 6                                                        |
| PKMYT1     | 0.144  | 0.15   | -0.198 | -0.356 | -1.116 | Protein Kinase, Membrane Associated Tyrosine/Threonine 1                     |
| CDC45      | 0.187  | 0.107  | -0.297 | -0.526 | -1.255 | Cell Division Cycle 45                                                       |
| CDC7       | -0.231 | -0.2   | -0.22  | -0.412 | -1.261 | Cell Division Cycle 7                                                        |
| CCNE1      | 0.606  | -0.068 | -0.611 | -1.211 | -1.268 | Cyclin E1                                                                    |
| CDKN2D     | -0.131 | -0.501 | -0.056 | 0.151  | -1.294 | Cyclin Dependent Kinase Inhibitor 2D                                         |
| CDKN2C     | -0.494 | -0.742 | -0.661 | -0.237 | -1.402 | Cyclin Dependent Kinase Inhibitor 2C                                         |
| ORC1       | 0.767  | 0.053  | -0.699 | -0.621 | -1.408 | Origin Recognition Complex Subunit 1                                         |
| ESPL1      | -0.963 | -0.673 | -0.507 | -0.599 | -1.448 | Extra Spindle Pole Bodies Like 1, Separase                                   |
| E2F1       | 0.526  | 0.049  | -0.852 | -1.497 | -1.559 | E2F Transcription Factor 1                                                   |
| E2F2       | 0.741  | -0.278 | -0.795 | -1.422 | -1.942 | E2F Transcription Factor 2                                                   |
| CCNE2      | 0.858  | 0.194  | -0.632 | -1.459 | -1.955 | Cyclin E2                                                                    |

## Apoptosis focused heatmaps

| Apoptosis | 2 hr   | 4 hr   | 6 hr   | 8 hr   | 24 hr  | Name                                                                   |
|-----------|--------|--------|--------|--------|--------|------------------------------------------------------------------------|
| APAF1     | 0.385  | 0.292  | 0.25   | 0.253  | 0.704  | Apoptotic Peptidase Activating Factor 1                                |
| BAX       | 0.229  | 0.339  | 0.427  | 0.561  | 0.477  | BCL2 Associated X, Apoptosis Regulator                                 |
| BBC3      | 2.09   | 1.701  | 1.827  | 1.627  | 2.389  | BCL2 Binding Component 3                                               |
| BCL2A1    | -0.106 | -0.257 | 0.089  | 0.339  | 1.801  | BCL2 Related Protein A1                                                |
| BCL2L1    | 0.49   | 0.528  | 0.68   | 1.035  | 1.091  | BCL2 Like 1                                                            |
| BCL2L11   | 0.161  | 0.661  | 0.383  | 0.283  | 2.781  | BCL2 Like 11                                                           |
| BIRC3     | 0.633  | 2.139  | 1.267  | 0.358  | 2.021  | Baculoviral IAP Repeat Containing 3                                    |
| BIRC5     | -0.528 | -0.629 | -0.731 | -0.558 | -0.465 | Baculoviral IAP Repeat Containing 5                                    |
| BNIP3L    | 0.211  | 0.322  | 0.589  | 0.994  | 1.679  | BCL2 Interacting Protein 3 Like                                        |
| BOK       | 0.194  | 0.013  | 0.223  | 0.45   | 0.971  | BCL2 Family Apoptosis Regulator BOK                                    |
| CAPN2     | 0.179  | 0.065  | 0.218  | 0.549  | 1.275  | Calpain 2                                                              |
| CASP1     | -0.067 | 0.361  | 0.956  | 1.02   | 2.191  | Caspase 1                                                              |
| CASP10    | -0.109 | 0.349  | 0.312  | 0.334  | 0.577  | Caspase 10                                                             |
| CASP2     | 0.422  | -0.032 | -0.217 | -0.069 | -0.066 | Caspase 2                                                              |
| CASP3     | 0.098  | 0.271  | 0.344  | 0.542  | 0.909  | Caspase 3                                                              |
| CASP6     | 0.081  | -0.071 | -0.07  | 0.248  | 0.687  | Caspase 6                                                              |
| CASP7     | -0.045 | 0.311  | 0.608  | 0.652  | 1.356  | Caspase 7                                                              |
| CTSB      | 0.246  | 0.054  | 0.004  | 0.405  | 0.971  | Cathepsin B                                                            |
| CTSF      | -0.063 | -0.001 | -0.077 | 0.067  | 0.745  | Cathepsin F                                                            |
| CTSK      | 0.175  | 0.331  | 0.277  | -0.022 | 1.581  | Cathepsin K                                                            |
| CTSO      | 0.271  | 0.342  | 0.219  | 0.537  | 1.147  | Cathepsin O                                                            |
| CTSS      | 0.063  | 0.339  | 0.41   | 0.72   | 2.041  | Cathepsin S                                                            |
| CTSZ      | 0.222  | 0.065  | 0.014  | 0.463  | 0.755  | Cathepsin Z                                                            |
| DAB2IP    | 0.55   | -0.14  | -0.063 | 0.09   | 0.222  | DAB2 Interacting Protein                                               |
| ERN1      | -0.352 | 0.484  | 0.365  | -0.057 | 0.072  | Endoplasmic Reticulum To Nucleus Signaling 1                           |
| FAS       | 0.871  | 1.51   | 1.348  | 0.91   | 1.263  | Fas Cell Surface Death Receptor                                        |
| GADD45A   | 1.233  | 1.076  | 1.153  | 0.88   | 1.778  | Growth Arrest And DNA Damage Inducible Alpha                           |
| HELLS     | 0.074  | 0.357  | -0.262 | -0.368 | -0.982 | Helicase, Lymphoid Specific                                            |
| IKBKB     | -0.246 | 0.115  | 0.393  | 0.069  | 0.376  | Inhibitor Of Nuclear Factor Kappa B Kinase Subunit Beta                |
| IRF1      | 0.798  | 1.008  | 0.237  | 0.132  | 1.986  | Interferon Regulatory Factor 1                                         |
| IRF6      | 0.73   | -0.035 | -0.809 | -0.98  | -2.681 | Interferon Regulatory Factor 6                                         |
| ITPR3     | -0.115 | -0.192 | 0.305  | -0.011 | 0.712  | Inositol 1,4,5-Trisphosphate Receptor Type 3                           |
| JUN       | -1.228 | 0.261  | 0.284  | 0.323  | 1.119  | Jun Proto-Oncogene, AP-1 Transcription Factor Subunit                  |
| MAP3K5    | 0.412  | -0.123 | -0.204 | 0.073  | 0.009  | Mitogen-Activated Protein Kinase Kinase Kinase 5                       |
| MDM2      | 2.096  | 1.75   | 1.922  | 1.397  | 1.909  | MDM2 Proto-Oncogene                                                    |
| NFKBIA    | 1.116  | 0.659  | 0.216  | 0.081  | 0.853  | NFKB Inhibitor Alpha                                                   |
| NFKBIE    | 0.458  | 0.669  | 0.246  | 0.033  | 0.738  | NFKB Inhibitor Epsilon                                                 |
| PARP3     | -0.116 | 0.155  | 0.246  | 0.119  | 0.546  | Poly(ADP-Ribose) Polymerase Family Member 3                            |
| PARP4     | 0.233  | -0.003 | 0.207  | 0.588  | 0.924  | Poly(ADP-Ribose) Polymerase Family Member 4                            |
| PIDD1     | -0.072 | 0.509  | 0.455  | -0.274 | -0.081 | P53-Induced Death Domain Protein 1                                     |
| PIK3CD    | -0.223 | 0.604  | 0.742  | 0.654  | 1.672  | Phosphatidylinositol-4,5-Bisphosphate 3-Kinase Catalytic Subunit Delta |
| PIK3R3    | 0.795  | -0.05  | -0.054 | 0.308  | 0.147  | Phosphoinositide-3-Kinase Regulatory Subunit 3                         |
| PMAIP1    | 0.575  | 0.715  | 0.526  | 0.14   | 1.243  | Phorbol-12-Myristate-13-Acetate-Induced Protein 1                      |
| RELB      | 0.213  | 1.85   | 1.101  | 0.575  | 1.811  | RELB Proto-Oncogene, NF-KB Subunit                                     |
| TNFRSF10B | 0.268  | 0.646  | 0.424  | 0.098  | 0.79   | TNF Receptor Superfamily Member 10b                                    |
| TNFRSF10C | 0.313  | 1.014  | 1.167  | 1.334  | 1.729  | TNF Receptor Superfamily Member 10c                                    |
| TNFRSF1B  | 0.105  | -0.373 | -0.357 | -0.217 | -1.109 | TNF Receptor Superfamily Member 1B                                     |
| TNFRSF21  | 0.384  | 0.236  | 0.274  | 0.495  | 1.893  | TNF Receptor Superfamily Member 21                                     |
| TNFSF10   | -0.457 | -0.028 | 0.174  | 0.223  | 2.081  | TNF Superfamily Member 10                                              |
| TP53      | 0.15   | 0.235  | 0.221  | 0.448  | 0.695  | Tumor Protein P53                                                      |
| TRAF1     | -0.272 | 1.614  | 1.3    | 0.337  | 2.844  | TNF Receptor Associated Factor 1                                       |
| TRAF3     | 0.167  | 0.429  | 0.202  | 0.116  | 0.686  | TNF Receptor Associated Factor 3                                       |
| TUBA1A    | 0.18   | -0.151 | -0.214 | 0.164  | 0.686  | Tubulin Alpha 1a                                                       |

## DNA Damage focused heatmaps

| DNA damage | 2 hr   | 4 hr   | 6 hr   | 8 hr   | 24 hr  | Name                                                           |
|------------|--------|--------|--------|--------|--------|----------------------------------------------------------------|
| ABL1       | 0.452  | -0.128 | 0.075  | 0.424  | 0.59   | ABL Proto-Oncogene 1, Non-Receptor Tyrosine Kinase             |
| APAF1      | 0.385  | 0.292  | 0.25   | 0.253  | 0.704  | Apoptotic Peptidase Activating Factor 1                        |
| ATRIP      | -0.064 | 0.133  | -0.112 | -0.277 | -0.86  | ATR Interacting Protein                                        |
| BAX        | 0.229  | 0.339  | 0.427  | 0.561  | 0.477  | BCL2 Associated X, Apoptosis Regulator                         |
| BBC3       | 2.09   | 1.701  | 1.827  | 1.627  | 2.389  | BCL2 Binding Component 3                                       |
| BRCA1      | 0.028  | 0.14   | 0.021  | 0.027  | -0.579 | BRCA1 DNA Repair Associated                                    |
| BRCA2      | 0.082  | 0.052  | -0.186 | -0.309 | -0.823 | BRCA2 DNA repair associated                                    |
| CASP3      | 0.098  | 0.271  | 0.344  | 0.542  | 0.909  | Caspase 3                                                      |
| CCNB1      | -0.946 | -1.877 | -1.593 | -0.76  | -0.194 | Cyclin B1                                                      |
| CCNB2      | -0.564 | -1.02  | -1.08  | -0.587 | -0.315 | Cyclin B2                                                      |
| CCND1      | 0.182  | 0.036  | 0.269  | 0.607  | 0.925  | Cyclin D1                                                      |
| CCND2      | -0.489 | 0.35   | 0.967  | 0.829  | 2.169  | Cyclin D2                                                      |
| CCNE1      | 0.606  | -0.068 | -0.611 | -1.211 | -1.268 | Cyclin E1                                                      |
| CCNE2      | 0.858  | 0.194  | -0.632 | -1.459 | -1.955 | Cyclin E2                                                      |
| CDC25A     | 0.825  | -0.142 | -0.686 | -0.819 | -0.874 | Cell Division Cycle 25A                                        |
| CDK1       | -0.58  | -0.475 | -0.509 | -0.371 | -0.709 | Cyclin Dependent Kinase 1                                      |
| CDK2       | 0.229  | 0.169  | -0.208 | -0.292 | -0.532 | Cyclin Dependent Kinase 2                                      |
| CDK6       | 0.442  | 0.3    | 0.078  | -0.058 | 0.605  | Cyclin Dependent Kinase 6                                      |
| CDKN1A     | 2.376  | 2.121  | 1.81   | 1.717  | 2.078  | Cyclin Dependent Kinase Inhibitor 1A                           |
| CDKN1B     | -0.677 | -0.178 | -0.237 | -0.16  | -0.719 | Cyclin Dependent Kinase Inhibitor 1B                           |
| DDB1       | 0.463  | 0.259  | 0.231  | 0.648  | 0.635  | Damage Specific DNA Binding Protein 1                          |
| DDB2       | 0.652  | 1.191  | 1.211  | 1.142  | 1.125  | Damage Specific DNA Binding Protein 2                          |
| E2F1       | 0.526  | 0.049  | -0.852 | -1.497 | -1.559 | E2F Transcription Factor 1                                     |
| ERCC6      | -0.397 | -0.15  | -0.389 | -0.599 | -1.726 | ERCC Excision Repair 6, Chromatin Remodeling Factor            |
| FANCD2     | -0.135 | 0.114  | 0.084  | -0.014 | -0.573 | FA Complementation Group D2                                    |
| FANCA      | -0.387 | 0.035  | -0.073 | -0.766 | -1.489 | FA Complementation Group A                                     |
| FANCB      | -0.122 | -0.093 | -0.481 | -0.77  | -1.134 | FA Complementation Group B                                     |
| FANCE      | -0.069 | -0.247 | -0.371 | -0.569 | -1.044 | FA Complementation Group E                                     |
| FANCF      | -0.555 | -0.014 | 0.164  | 0.405  | 0.551  | FA Complementation Group F                                     |
| FANCG      | -0.08  | -0.08  | -0.213 | -0.408 | -0.943 | FA Complementation Group G                                     |
| FANCI      | 0.084  | 0.21   | 0.135  | 0.229  | -0.602 | FA Complementation Group I                                     |
| FANCL      | -0.222 | -0.007 | -0.128 | -0.277 | -0.338 | FA Complementation Group L                                     |
| FANCM      | -0.19  | -0.157 | -0.382 | -0.341 | -0.53  | FA Complementation Group M                                     |
| FAS        | 0.871  | 1.51   | 1.348  | 0.91   | 1.263  | Fas Cell Surface Death Receptor                                |
| GADD45A    | 1.233  | 1.076  | 1.153  | 0.88   | 1.778  | Growth Arrest And DNA Damage Inducible Alpha                   |
| H2AFX      | -0.526 | -0.741 | -0.723 | -0.366 | -0.877 | H2A.X Variant Histone                                          |
| MDM2       | 2.096  | 1.75   | 1.922  | 1.397  | 1.909  | MDM2 Proto-Oncogene                                            |
| PIDD1      | -0.072 | 0.509  | 0.455  | -0.274 | -0.081 | P53-Induced Death Domain Protein 1                             |
| PMAIP1     | 0.575  | 0.715  | 0.526  | 0.14   | 1.243  | Phorbol-12-Myristate-13-Acetate-Induced Protein 1              |
| PML        | -0.006 | 0.198  | 0.288  | 0.391  | 0.86   | PML Nuclear Body Scaffold                                      |
| RAD1       | 0.078  | -0.003 | -0.23  | -0.342 | -0.658 | RAD1 Checkpoint DNA Exonuclease                                |
| RAD51      | 0.573  | 0.08   | -0.372 | -0.194 | -0.586 | RAD51 Recombinase                                              |
| RAD52      | -0.9   | 0.006  | 0.162  | -0.537 | -0.59  | RAD52 Homolog, DNA Repair Protein                              |
| RAD9A      | -0.424 | -0.21  | -0.281 | -1.161 | -1.309 | RAD9 Checkpoint Clamp Component A                              |
| RPA2       | 0.199  | 0.025  | -0.217 | -0.114 | -0.448 | Replication Protein A2                                         |
| RRM2B      | 0.606  | 1.02   | 1.008  | 1.006  | 1.278  | Ribonucleotide Reductase Regulatory TP53 Inducible Subunit M2B |
| TP53       | 0.15   | 0.235  | 0.221  | 0.448  | 0.695  | Tumor Protein P53                                              |
| SESN1      | 1.545  | 1.359  | 1.31   | 1.108  | 1.605  | Sestrin 1                                                      |
| TNFRSF10B  | 0.268  | 0.646  | 0.424  | 0.098  | 0.79   | TNF Receptor Superfamily Member 10b                            |

## Senescence focused heatmaps

| Senescence | 2 hr   | 4 hr   | 6 hr   | 8 hr   | 24 hr  | Name                                                                   |
|------------|--------|--------|--------|--------|--------|------------------------------------------------------------------------|
| IL1A       | 0.258  | 0.519  | 1.256  | 1.02   | 3.087  | Interleukin 1 Alpha                                                    |
| NFATC2     | 0.762  | 0.812  | 1.642  | 1.81   | 2.853  | Nuclear Factor Of Activated T Cells 2                                  |
| CDKN2B     | 0.673  | 0.852  | 0.679  | 0.885  | 2.224  | Cyclin Dependent Kinase Inhibitor 2B                                   |
| CCND2      | -0.489 | 0.35   | 0.967  | 0.829  | 2.169  | Cyclin D2                                                              |
| CDKN1A     | 2.376  | 2.121  | 1.81   | 1.717  | 2.078  | Cyclin Dependent Kinase Inhibitor 1A                                   |
| MDM2       | 2.096  | 1.75   | 1.922  | 1.397  | 1.909  | MDM2 Proto-Oncogene                                                    |
| GADD45A    | 1.233  | 1.076  | 1.153  | 0.88   | 1.778  | Growth Arrest And DNA Damage Inducible Alpha                           |
| SMAD3      | 0.35   | 0.642  | 0.889  | 0.778  | 1.727  | SMAD Family Member 3                                                   |
| ETS1       | 0.681  | 0.683  | 0.691  | 0.738  | 1.723  | ETS Proto-Oncogene 1, Transcription Factor                             |
| PIK3CD     | -0.223 | 0.604  | 0.742  | 0.654  | 1.672  | Phosphatidylinositol-4,5-Bisphosphate 3-Kinase Catalytic Subunit Delta |
| CAPN2      | 0.179  | 0.065  | 0.218  | 0.549  | 1.275  | Calpain 2                                                              |
| TRAF3IP2   | -0.336 | -0.164 | 0.344  | 0.873  | 1.162  | TRAF3 Interacting Protein 2                                            |
| SQSTM1     | 0.163  | 0.662  | 0.472  | 0.484  | 1.064  | Sequestosome 1                                                         |
| MAP2K3     | 0.474  | 0.289  | 0.361  | 0.606  | 1.049  | Mitogen-Activated Protein Kinase Kinase 3                              |
| CCNA1      | -0.14  | -0.322 | -0.009 | 0.526  | 0.932  | Cyclin A1                                                              |
| CCND1      | 0.182  | 0.036  | 0.269  | 0.607  | 0.925  | Cyclin D1                                                              |
| FOXO1      | 0.586  | 0.567  | 0.406  | 0.49   | 0.888  | Forkhead Box O1                                                        |
| TGFBR2     | -0.134 | -0.081 | 0.064  | 0.292  | 0.815  | Transforming Growth Factor Beta Receptor 2                             |
| HLA-A      | 0.24   | 0.136  | 0.034  | 0.398  | 0.799  | Major Histocompatibility Complex, Class I, A                           |
| PPP3CA     | 0.244  | -0.113 | -0.152 | 0.092  | 0.781  | Protein Phosphatase 3 Catalytic Subunit Alpha                          |
| ITPR3      | -0.115 | -0.192 | 0.305  | -0.011 | 0.712  | Inositol 1,4,5-Trisphosphate Receptor Type 3                           |
| ZFP36L2    | -0.183 | 0.393  | 0.014  | -0.018 | 0.7    | ZFP36 Ring Finger Protein Like 2                                       |
| CDK6       | 0.442  | 0.3    | 0.078  | -0.058 | 0.605  | Cyclin Dependent Kinase 6                                              |
| PTEN       | 0.157  | 0.241  | 0.099  | 0.303  | 0.6    | Phosphatase And Tensin Homolog                                         |
| RBL2       | -0.215 | -0.142 | 0.09   | 0.169  | 0.443  | RB Transcriptional Corepressor Like 2                                  |
| PPP1CB     | 0.227  | 0.117  | 0.125  | 0.36   | 0.44   | Protein Phosphatase 1 Catalytic Subunit Beta                           |
| ZFP36L1    | -0.386 | 0.272  | 0.159  | 0.134  | 0.379  | ZFP36 Ring Finger Protein Like 1                                       |
| TGFBR1     | 0.838  | 0.422  | 0.084  | 0.017  | 0.349  | Transforming Growth Factor Beta Receptor 1                             |
| PIK3R3     | 0.795  | -0.05  | -0.054 | 0.308  | 0.147  | Phosphoinositide-3-Kinase Regulatory Subunit 3                         |
| SIRT1      | 0.708  | 0.084  | -0.089 | 0.055  | 0.058  | Sirtuin 1                                                              |
| CCNB1      | -0.946 | -1.877 | -1.593 | -0.76  | -0.194 | Cyclin B1                                                              |
| LIN54      | 0.41   | 0.053  | -0.195 | -0.052 | -0.295 | Lin-54 DREAM MuvB Core Complex Component                               |
| RBL1       | 0.429  | 0.244  | 0.032  | 0.082  | -0.307 | RB Transcriptional Corepressor Like 1                                  |
| CCNB2      | -0.564 | -1.02  | -1.08  | -0.587 | -0.315 | Cyclin B2                                                              |
| MAPK11     | -0.242 | 0.172  | 0.156  | -0.327 | -0.329 | Mitogen-Activated Protein Kinase 11                                    |
| MAPK14     | 0.147  | -0.232 | -0.432 | -0.257 | -0.446 | Mitogen-Activated Protein Kinase 14                                    |
| CDK2       | 0.229  | 0.169  | -0.208 | -0.292 | -0.532 | Cyclin Dependent Kinase 2                                              |
| E2F4       | 0.194  | -0.21  | -0.217 | -0.217 | -0.534 | E2F Transcription Factor 4                                             |
| RAD1       | 0.078  | -0.003 | -0.23  | -0.342 | -0.658 | RAD1 Checkpoint DNA Exonuclease                                        |
| CDK1       | -0.58  | -0.475 | -0.509 | -0.371 | -0.709 | Cyclin Dependent Kinase 1                                              |
| LIN52      | -0.1   | -0.239 | -0.467 | -0.45  | -0.744 | Lin-52 DREAM MuvB Core Complex Component                               |
| CCNA2      | -0.504 | -0.78  | -0.736 | -0.267 | -0.755 | Cyclin A2                                                              |
| MAPK12     | -0.209 | -0.107 | -0.207 | -0.7   | -0.784 | Mitogen-Activated Protein Kinase 12                                    |
| CDC25A     | 0.825  | -0.142 | -0.686 | -0.819 | -0.874 | Cell Division Cycle 25A                                                |
| CCNE1      | 0.606  | -0.068 | -0.611 | -1.211 | -1.268 | Cyclin E1                                                              |
| RAD9A      | -0.424 | -0.21  | -0.281 | -1.161 | -1.309 | RAD9 Checkpoint Clamp Component A                                      |
| E2F1       | 0.526  | 0.049  | -0.852 | -1.497 | -1.559 | E2F Transcription Factor 1                                             |
| E2F2       | 0.741  | -0.278 | -0.795 | -1.422 | -1.942 | E2F Transcription Factor 2                                             |
| CCNE2      | 0.858  | 0.194  | -0.632 | -1.459 | -1.955 | Cyclin E2                                                              |
| IGFBP3     | -0.076 | -0.008 | -0.263 | -0.119 | -3.927 | Insulin Like Growth Factor Binding Protein 3                           |

Inflammatory response focused heatmaps

| Inflammmator | 2 hr   | 4 hr   | 6 hr   | 8 hr   | 24 hr  | Name                                        |
|--------------|--------|--------|--------|--------|--------|---------------------------------------------|
| TNFSF15      | -0.336 | 0.56   | 1.691  | 2.056  | 5.46   | TNF Superfamily Member 15                   |
| LTB          | -0.335 | -0.08  | 0.314  | -0.081 | 4.73   | Lymphotoxin Beta                            |
| TNFRSF4      | -0.87  | 0.619  | 1.209  | 0.905  | 3.413  | TNF Receptor Superfamily Member 4           |
| CXCR4        | -0.328 | 0.669  | 1.207  | 1.198  | 3.156  | C-X-C Motif Chemokine Receptor 4            |
| IL1A         | 0.258  | 0.519  | 1.256  | 1.02   | 3.087  | Interleukin 1 Alpha                         |
| FGF16        | -0.12  | -0.09  | 0.293  | 0.444  | 2.89   | Fibroblast Growth Factor 16                 |
| LGALS9       | 0.146  | 0.208  | 0.164  | 0.546  | 2.621  | Galectin 9                                  |
| CCL2         | -0.31  | 1.245  | 0.886  | 0.285  | 2.573  | C-C Motif Chemokine Ligand 2                |
| CXCL5        | 0.026  | 0.853  | 0.856  | 0.919  | 2.548  | C-X-C Motif Chemokine Ligand 5              |
| IL32         | 0.221  | 0.52   | 0.757  | 0.823  | 2.378  | Interleukin 32                              |
| SDC1         | 0.418  | 1.19   | 1.271  | 1.696  | 2.248  | Syndecan 1                                  |
| IL4I1        | -0.032 | 0.639  | 0.856  | 1.265  | 2.175  | Interleukin 4 Induced 1                     |
| UBE2L6       | 0.151  | 0.088  | 0.325  | 0.744  | 2.148  | Ubiquitin Conjugating Enzyme E2 L6          |
| TNFSF10      | -0.457 | -0.028 | 0.174  | 0.223  | 2.081  | TNF Superfamily Member 10                   |
| LIF          | 1.374  | 1.709  | 1.827  | 0.972  | 2.039  | LIF Interleukin 6 Family Cytokine           |
| BIRC3        | 0.633  | 2.139  | 1.267  | 0.358  | 2.021  | Baculoviral IAP Repeat Containing 3         |
| TNFSF9       | 2.12   | 2.236  | 1.847  | 1.801  | 1.995  | TNF Superfamily Member 9                    |
| PSMB9        | 0.065  | 0.433  | 0.738  | 1.047  | 1.989  | Proteasome 20S Subunit Beta 9               |
| CSF1         | 0.517  | 1.239  | 0.384  | -0.155 | 1.945  | Colony Stimulating Factor 1                 |
| TNFRSF21     | 0.384  | 0.236  | 0.274  | 0.495  | 1.893  | TNF Receptor Superfamily Member 21          |
| TNFSF4       | -0.075 | 0.605  | 0.874  | 0.867  | 1.852  | TNF Superfamily Member 4                    |
| IRAK2        | 0.414  | 0.909  | 0.684  | 0.616  | 1.847  | Interleukin 1 Receptor Associated Kinase 2  |
| TNFRSF10C    | 0.313  | 1.014  | 1.167  | 1.334  | 1.729  | TNF Receptor Superfamily Member 10c         |
| IL12A        | 0.544  | 1.478  | 1.564  | 0.608  | 1.6    | Interleukin 12A                             |
| IL15         | -0.049 | 0.746  | 0.866  | 0.542  | 1.459  | Interleukin 15                              |
| UBA7         | -0.206 | 0.146  | 0.505  | 0.205  | 1.343  | Ubiquitin Like Modifier Activating Enzyme 7 |
| KSR2         | -0.12  | -0.429 | 0.466  | 0.455  | 1.32   | Kinase Suppressor Of Ras 2                  |
| TNFSF18      | -0.978 | 0.252  | 0.425  | 0.086  | 1.224  | TNF Superfamily Member 18                   |
| MMP1         | 0.188  | 0.008  | -0.019 | 0.382  | 1.212  | Matrix Metalloproteinase 1                  |
| TNFRSF14     | -0.287 | 0.599  | 1.079  | 0.845  | 1.149  | TNF Receptor Superfamily Member 14          |
| VIM          | 0.342  | 0.131  | 0.061  | 0.442  | 1.098  | Vimentin                                    |
| SQSTM1       | 0.163  | 0.662  | 0.472  | 0.484  | 1.064  | Sequestosome 1                              |
| RALA         | 0.354  | -0.169 | -0.301 | -0.111 | 1.055  | RAS Like Proto-Oncogene A                   |
| CXCL3        | 0.966  | 0.711  | -0.194 | -0.468 | 0.981  | C-X-C Motif Chemokine Ligand 3              |
| GBP3         | -0.246 | 0.092  | 0.457  | 0.628  | 0.973  | Guanylate Binding Protein 3                 |
| CSF3         | -1.789 | -0.501 | 0.25   | -0.337 | 0.392  | Colony Stimulating Factor 3                 |
| FGF2         | 1.11   | 0.858  | 0.306  | 0.435  | -0.171 | Fibroblast Growth Factor 2                  |
| CXCL8        | -0.937 | 0.012  | -0.628 | -1.346 | -0.567 | C-X-C Motif Chemokine Ligand 8              |
| IL11         | 1.145  | 0.329  | -0.282 | -0.618 | -0.61  | Interleukin 11                              |
| TNFRSF11A    | 0.151  | -0.005 | -0.228 | -0.326 | -1.091 | TNF Receptor Superfamily Member 11a         |
| TNFRSF1B     | 0.105  | -0.373 | -0.357 | -0.217 | -1.109 | TNF Receptor Superfamily Member 1B          |
| IL21R        | 1.534  | 0.253  | -0.048 | 0.011  | -1.148 | Interleukin 21 Receptor                     |
| PTGS2        | 2.054  | 0.236  | -0.45  | -0.748 | -1.219 | Prostaglandin-Endoperoxide Synthase 2       |
| IL18         | -0.09  | 0.102  | -0.466 | -0.288 | -1.287 | Interleukin 18                              |
| RPS6KA5      | 0.836  | -0.031 | -0.089 | -0.295 | -1.319 | Ribosomal Protein S6 Kinase A5              |
| EGR1         | -0.777 | -0.185 | -1.158 | -1.788 | -1.733 | Early Growth Response 1                     |
| MAOA         | 0.196  | -0.101 | -0.418 | -0.229 | -2.023 | Monoamine Oxidase A                         |
| IL1RL1       | 0.252  | 0.076  | -0.4   | -0.477 | -2.633 | Interleukin 1 Receptor Like 1               |
| IRF6         | 0.73   | -0.035 | -0.809 | -0.98  | -2.681 | Interferon Regulatory Factor 6              |
| CXCL12       | 0.749  | 0.03   | -0.782 | -1     | -3.244 | C-X-C Motif Chemokine Ligand 12             |
